# Supplementary material for: Temporal variation in the vocal behaviour of southern right whales in the Auckland Islands, New Zealand
Source: R Soc Open Sci. 2019 Mar 20;6(3):181487. doi: 10.1098/rsos.181487 (PMC6458419; doi:10.1098/rsos.181487)
Supplement: Summary of the analysis of the southern right whale vocalisation data [file rsos181487supp1.xlsx]

## Sheet: DATA
LineNumber	Folder	DSGnumber	RWcalls	NoOfCalls	CallsPerHr	MeanCallsFor24hPeriod	MeanAdjustedCallRate	Upcall	UpcallsPerHr	Downcall	Gunshot	TonalLow	LongTonalLow	Pulsive	Hybrid	High	VeryHigh	Blow	UpcallDetector	Season	Date	Month	Time	NauticalTwilightTimes	DielPeriod
2	2011	0018	Yes	9	216	222.857	-6.85714	3	72	0	0	0	0	2	0	4	0	0	7	Winter	2011-07-22	July	13:30		Afternoon
3	2011	0020	Yes	18	432	222.857	209.143	12	288	1	0	1	2	2	0	0	0	0	10	Winter	2011-07-22	July	14:00		Afternoon
4	2011	0022	Yes	3	72	222.857	-150.857	2	48	0	0	0	0	1	0	0	0	0	2	Winter	2011-07-22	July	14:30		Afternoon
5	2011	0024	Yes	7	168	222.857	-54.8571	0	0	0	0	0	0	0	0	7	0	0	1	Winter	2011-07-22	July	15:00		Afternoon
6	2011	0026	Yes	4	96	222.857	-126.857	3	72	0	1	0	0	0	0	0	0	0	3	Winter	2011-07-22	July	15:30		Afternoon
7	2011	0028	Yes	12	288	222.857	65.1429	3	72	0	0	1	1	5	1	1	0	0	4	Winter	2011-07-22	July	16:00		Afternoon
8	2011	0030	Yes	9	216	222.857	-6.85714	1	24	0	5	1	0	1	1	0	0	0	5	Winter	2011-07-22	July	16:30		Afternoon
9	2011	0032	Yes	7	168	222.857	-54.8571	4	96	1	0	1	0	0	0	1	0	0	4	Winter	2011-07-22	July	17:00		Afternoon
10	2011	0034	Yes	3	72	222.857	-150.857	0	0	1	0	1	1	0	0	0	0	0	1	Winter	2011-07-22	July	17:30	17:21 set	Dusk
11	2011	0036	Yes	4	96	222.857	-126.857	1	24	0	0	1	1	1	0	0	0	0	4	Winter	2011-07-22	July	18:00		Dusk
12	2011	0038	Yes	8	192	222.857	-30.8571	0	0	5	0	3	0	0	0	0	0	0	3	Winter	2011-07-22	July	18:30	18:38 end	Dusk
13	2011	0040	Yes	9	216	222.857	-6.85714	5	120	0	0	2	1	1	0	0	0	0	7	Winter	2011-07-22	July	19:00		Night
14	2011	0042	Yes	1	24	222.857	-198.857	0	0	1	0	0	0	0	0	0	0	0	4	Winter	2011-07-22	July	19:30		Night
15	2011	0044	Yes	17	408	222.857	185.143	11	264	0	0	5	1	0	0	0	0	0	7	Winter	2011-07-22	July	20:00		Night
16	2011	0046	Yes	8	192	222.857	-30.8571	5	120	2	0	0	0	1	0	0	0	0	8	Winter	2011-07-22	July	20:30		Night
17	2011	0048	Yes	16	384	222.857	161.143	4	96	0	12	0	0	0	0	0	0	0	2	Winter	2011-07-22	July	21:00		Night
18	2011	0050	Yes	2	48	222.857	-174.857	0	0	0	0	0	1	1	0	0	0	0	1	Winter	2011-07-22	July	21:30		Night
19	2011	0052	Yes	8	192	222.857	-30.8571	2	48	1	0	4	0	0	1	0	0	0	5	Winter	2011-07-22	July	22:00		Night
20	2011	0054	Yes	31	744	222.857	521.143	8	192	3	21	0	0	0	0	0	0	0	2	Winter	2011-07-22	July	22:30		Night
21	2011	0056	Yes	11	264	222.857	41.1429	6	144	3	0	2	0	0	0	0	0	0	11	Winter	2011-07-22	July	23:00		Night
22	2011	0058	Yes	8	192	222.857	-30.8571	8	192	0	0	0	0	0	0	0	0	0	10	Winter	2011-07-22	July	23:30		Night
23	2011	0060	Yes	7	168	198.5	-30.5	6	144	0	0	1	0	0	0	0	0	0	10	Winter	2011-07-23	July	00:00		Night
24	2011	0062	Yes	12	288	198.5	89.5	2	48	8	0	2	0	0	0	0	0	0	4	Winter	2011-07-23	July	00:30		Night
25	2011	0064	Yes	8	192	198.5	-6.5	4	96	0	0	0	0	2	0	2	0	0	2	Winter	2011-07-23	July	01:00		Night
26	2011	0066	Yes	2	48	198.5	-150.5	0	0	0	0	0	0	2	0	0	0	0	2	Winter	2011-07-23	July	01:30		Night
27	2011	0068	Yes	3	72	198.5	-126.5	0	0	0	0	0	0	2	0	1	0	0	2	Winter	2011-07-23	July	02:00		Night
28	2011	0070	Yes	1	24	198.5	-174.5	1	24	0	0	0	0	0	0	0	0	0	3	Winter	2011-07-23	July	02:30		Night
29	2011	0072	Yes	2	48	198.5	-150.5	0	0	0	0	2	0	0	0	0	0	0	2	Winter	2011-07-23	July	03:00		Night
30	2011	0074	Yes	1	24	198.5	-174.5	0	0	0	0	0	0	1	0	0	0	0	0	Winter	2011-07-23	July	03:30		Night
31	2011	0076	Yes	11	264	198.5	65.5	4	96	2	0	0	0	3	0	2	0	0	8	Winter	2011-07-23	July	04:00		Night
32	2011	0078	Yes	6	144	198.5	-54.5	2	48	0	0	0	0	0	0	3	1	0	4	Winter	2011-07-23	July	04:30		Night
33	2011	0080	Yes	2	48	198.5	-150.5	0	0	0	0	0	0	1	0	1	0	0	0	Winter	2011-07-23	July	05:00		Night
34	2011	0082	Yes	5	120	198.5	-78.5	4	96	0	0	1	0	0	0	0	0	0	5	Winter	2011-07-23	July	05:30		Night
35	2011	0084	Yes	4	96	198.5	-102.5	1	24	0	0	2	0	1	0	0	0	0	1	Winter	2011-07-23	July	06:00		Night
36	2011	0086	Yes	17	408	198.5	209.5	10	240	2	0	0	0	1	4	0	0	0	12	Winter	2011-07-23	July	06:30		Night
37	2011	0088	Yes	8	192	198.5	-6.5	0	0	0	0	0	0	2	6	0	0	0	0	Winter	2011-07-23	July	07:00		Night
38	2011	0090	Yes	19	456	198.5	257.5	0	0	0	0	0	0	0	13	2	0	4	0	Winter	2011-07-23	July	07:30	7:24 begin	Dawn
39	2011	0092	Yes	5	120	198.5	-78.5	0	0	0	0	0	0	1	2	0	0	2	2	Winter	2011-07-23	July	08:00		Dawn
40	2011	0094	Yes	6	144	198.5	-54.5	1	24	0	0	1	0	1	0	1	2	0	1	Winter	2011-07-23	July	08:30	8:41 rise	Dawn
41	2011	0096	Yes	2	48	198.5	-150.5	0	0	0	0	0	0	2	0	0	0	0	2	Winter	2011-07-23	July	09:00		Morning
42	2011	0098	Yes	3	72	198.5	-126.5	0	0	0	0	2	0	1	0	0	0	0	0	Winter	2011-07-23	July	09:30		Morning
43	2011	0100	Yes	1	24	198.5	-174.5	1	24	0	0	0	0	0	0	0	0	0	3	Winter	2011-07-23	July	10:00		Morning
44	2011	0102	Yes	4	96	198.5	-102.5	3	72	0	0	0	0	1	0	0	0	0	5	Winter	2011-07-23	July	10:30		Morning
45	2011	0104	Yes	1	24	198.5	-174.5	0	0	1	0	0	0	0	0	0	0	0	1	Winter	2011-07-23	July	11:00		Morning
46	2011	0106	Yes	3	72	198.5	-126.5	0	0	0	0	0	0	0	0	3	0	0	0	Winter	2011-07-23	July	11:30		Morning
47	2011	0108	Yes	1	24	198.5	-174.5	0	0	0	0	0	0	1	0	0	0	0	3	Winter	2011-07-23	July	12:00		Morning
48	2011	0110	Yes	5	120	198.5	-78.5	5	120	0	0	0	0	0	0	0	0	0	6	Winter	2011-07-23	July	12:30		Morning
49	2011	0112	Yes	16	384	198.5	185.5	5	120	0	1	0	0	0	9	0	0	1	6	Winter	2011-07-23	July	13:00	13:01 transit	Afternoon
50	2011	0114	Yes	2	48	198.5	-150.5	2	48	0	0	0	0	0	0	0	0	0	4	Winter	2011-07-23	July	13:30		Afternoon
51	2011	0116	Yes	14	336	198.5	137.5	9	216	3	0	2	0	0	0	0	0	0	11	Winter	2011-07-23	July	14:00		Afternoon
52	2011	0118	Yes	8	192	198.5	-6.5	0	0	0	4	0	0	0	0	2	2	0	0	Winter	2011-07-23	July	14:30		Afternoon
53	2011	0120	Yes	9	216	198.5	17.5	7	168	0	0	0	0	0	0	2	0	0	7	Winter	2011-07-23	July	15:00		Afternoon
54	2011	0122	Yes	5	120	198.5	-78.5	3	72	1	0	0	0	0	0	1	0	0	1	Winter	2011-07-23	July	15:30		Afternoon
55	2011	0124	Yes	11	264	198.5	65.5	9	216	0	0	2	0	0	0	0	0	0	12	Winter	2011-07-23	July	16:00		Afternoon
56	2011	0126	Yes	8	192	198.5	-6.5	3	72	0	0	3	0	0	0	0	0	2	4	Winter	2011-07-23	July	16:30		Afternoon
57	2011	0128	Yes	7	168	198.5	-30.5	5	120	0	0	1	0	1	0	0	0	0	10	Winter	2011-07-23	July	17:00		Afternoon
58	2011	0130	Yes	12	288	198.5	89.5	4	96	0	0	4	1	0	0	3	0	0	11	Winter	2011-07-23	July	17:30	17:22 set	Dusk
59	2011	0132	Yes	11	264	198.5	65.5	0	0	7	0	3	0	1	0	0	0	0	2	Winter	2011-07-23	July	18:00		Dusk
60	2011	0134	Yes	14	336	198.5	137.5	11	264	2	0	1	0	0	0	0	0	0	16	Winter	2011-07-23	July	18:30	18:39 end	Dusk
61	2011	0136	Yes	8	192	198.5	-6.5	4	96	0	0	4	0	0	0	0	0	0	11	Winter	2011-07-23	July	19:00		Night
62	2011	0138	Yes	13	312	198.5	113.5	7	168	1	0	2	0	0	3	0	0	0	11	Winter	2011-07-23	July	19:30		Night
63	2011	0140	Yes	15	360	198.5	161.5	8	192	0	0	0	0	3	4	0	0	0	10	Winter	2011-07-23	July	20:00		Night
64	2011	0142	Yes	8	192	198.5	-6.5	6	144	0	0	0	0	2	0	0	0	0	8	Winter	2011-07-23	July	20:30		Night
65	2011	0144	Yes	19	456	198.5	257.5	9	216	0	0	0	0	5	0	4	1	0	15	Winter	2011-07-23	July	21:00		Night
66	2011	0146	Yes	5	120	198.5	-78.5	3	72	0	0	0	0	0	0	0	0	2	4	Winter	2011-07-23	July	21:30		Night
67	2011	0148	Yes	21	504	198.5	305.5	3	72	0	0	3	0	1	7	2	0	5	3	Winter	2011-07-23	July	22:00		Night
68	2011	0150	Yes	18	432	198.5	233.5	2	48	0	0	3	0	1	5	2	0	5	1	Winter	2011-07-23	July	22:30		Night
69	2011	0152	Yes	22	528	198.5	329.5	15	360	0	0	0	0	4	0	0	0	4	14	Winter	2011-07-23	July	23:00		Night
70	2011	0154	Yes	12	288	198.5	89.5	4	96	0	0	0	0	6	0	0	0	2	9	Winter	2011-07-23	July	23:30		Night
71	2011	0156	Yes	21	504	294	210	10	240	0	0	8	0	1	0	0	0	2	17	Winter	2011-07-24	July	00:00		Night
72	2011	0158	Yes	23	552	294	258	3	72	0	0	3	0	0	15	0	0	2	5	Winter	2011-07-24	July	00:30		Night
73	2011	0160	Yes	26	624	294	330	8	192	0	0	3	0	1	12	0	0	2	14	Winter	2011-07-24	July	01:00		Night
74	2011	0162	Yes	32	768	294	474	21	504	0	0	3	0	2	6	0	0	0	18	Winter	2011-07-24	July	01:30		Night
75	2011	0164	Yes	18	432	294	138	4	96	3	0	2	0	3	3	0	0	3	5	Winter	2011-07-24	July	02:00		Night
76	2011	0166	Yes	25	600	294	306	9	216	0	0	5	1	3	0	3	0	4	11	Winter	2011-07-24	July	02:30		Night
77	2011	0168	Yes	25	600	294	306	20	480	0	0	0	0	2	0	0	0	3	14	Winter	2011-07-24	July	03:00		Night
78	2011	0170	Yes	10	240	294	-54	5	120	0	0	5	0	0	0	0	0	0	11	Winter	2011-07-24	July	03:30		Night
79	2011	0172	No	0	0	294	-294	0	0	0	0	0	0	0	0	0	0	0	0	Winter	2011-07-24	July	04:00		Night
80	2011	0174	Yes	6	144	294	-150	2	48	0	0	2	0	2	0	0	0	0	8	Winter	2011-07-24	July	04:30		Night
81	2011	0176	Yes	12	288	294	-6	6	144	0	0	3	0	2	0	1	0	0	7	Winter	2011-07-24	July	05:00		Night
82	2011	0178	Yes	15	360	294	66	5	120	0	3	0	0	7	0	0	0	0	5	Winter	2011-07-24	July	05:30		Night
83	2011	0180	Yes	7	168	294	-126	2	48	0	1	0	0	2	0	1	0	1	0	Winter	2011-07-24	July	06:00		Night
84	2011	0182	Yes	10	240	294	-54	5	120	2	0	1	0	0	0	0	0	2	6	Winter	2011-07-24	July	06:30		Night
85	2011	0184	Yes	12	288	294	-6	4	96	0	0	0	0	6	2	0	0	0	6	Winter	2011-07-24	July	07:00		Night
86	2011	0186	Yes	11	264	294	-30	1	24	0	0	2	0	2	1	1	0	4	2	Winter	2011-07-24	July	07:30	7:23 begin	Dawn
87	2011	0188	Yes	11	264	294	-30	0	0	2	1	0	0	4	1	0	0	3	5	Winter	2011-07-24	July	08:00		Dawn
88	2011	0190	Yes	6	144	294	-150	3	72	0	0	0	0	1	0	0	0	2	1	Winter	2011-07-24	July	08:30	8:40 rise	Dawn
89	2011	0192	Yes	3	72	294	-222	0	0	0	0	0	0	3	0	0	0	0	0	Winter	2011-07-24	July	09:00		Morning
90	2011	0194	Yes	9	216	294	-78	6	144	2	0	1	0	0	0	0	0	0	7	Winter	2011-07-24	July	09:30		Morning
91	2011	0196	Yes	16	384	294	90	4	96	0	0	2	0	8	2	0	0	0	8	Winter	2011-07-24	July	10:00		Morning
92	2011	0198	Yes	5	120	294	-174	0	0	0	0	0	0	4	0	1	0	0	1	Winter	2011-07-24	July	10:30		Morning
93	2011	0200	Yes	10	240	294	-54	5	120	0	2	0	0	3	0	0	0	0	10	Winter	2011-07-24	July	11:00		Morning
94	2011	0202	Yes	5	120	294	-174	3	72	0	0	0	0	2	0	0	0	0	3	Winter	2011-07-24	July	11:30		Morning
95	2011	0204	Yes	4	96	294	-198	0	0	0	0	0	0	0	0	0	0	4	1	Winter	2011-07-24	July	12:00		Morning
96	2011	0206	Yes	14	336	294	42	0	0	0	0	6	0	5	0	3	0	0	1	Winter	2011-07-24	July	12:30		Morning
97	2011	0208	Yes	2	48	294	-246	1	24	0	0	0	0	0	0	0	0	1	1	Winter	2011-07-24	July	13:00	13:01 transit	Afternoon
98	2011	0210	Yes	11	264	294	-30	3	72	5	0	0	0	1	0	0	0	2	4	Winter	2011-07-24	July	13:30		Afternoon
99	2011	0212	Yes	17	408	294	114	14	336	0	0	0	0	2	0	0	0	1	19	Winter	2011-07-24	July	14:00		Afternoon
100	2011	0214	Yes	6	144	294	-150	0	0	0	0	3	0	3	0	0	0	0	3	Winter	2011-07-24	July	14:30		Afternoon
101	2011	0216	Yes	2	48	294	-246	0	0	0	0	0	0	2	0	0	0	0	4	Winter	2011-07-24	July	15:00		Afternoon
102	2011	0218	Yes	6	144	294	-150	3	72	0	0	2	1	0	0	0	0	0	5	Winter	2011-07-24	July	15:30		Afternoon
103	2011	0220	Yes	8	192	294	-102	0	0	0	0	3	0	0	5	0	0	0	1	Winter	2011-07-24	July	16:00		Afternoon
104	2011	0222	Yes	17	408	294	114	0	0	0	0	0	0	3	9	5	0	0	2	Winter	2011-07-24	July	16:30		Afternoon
105	2011	0224	Yes	8	192	294	-102	4	96	0	1	0	0	3	0	0	0	0	4	Winter	2011-07-24	July	17:00		Afternoon
106	2011	0226	Yes	1	24	294	-270	0	0	0	0	0	0	1	0	0	0	0	2	Winter	2011-07-24	July	17:30	17:23 set	Dusk
107	2011	0228	Yes	37	888	294	594	13	312	0	0	0	0	0	18	0	0	6	17	Winter	2011-07-24	July	18:00		Dusk
108	2011	0230	Yes	19	456	294	162	0	0	1	1	2	0	0	9	3	0	3	5	Winter	2011-07-24	July	18:30	18:40 end	Dusk
109	2011	0232	Yes	13	312	294	18	8	192	0	0	0	0	3	0	2	0	0	11	Winter	2011-07-24	July	19:00		Night
110	2011	0234	Yes	16	384	294	90	12	288	0	0	1	0	2	0	0	0	1	17	Winter	2011-07-24	July	19:30		Night
111	2011	0236	Yes	22	528	294	234	10	240	2	1	0	0	1	7	0	0	1	13	Winter	2011-07-24	July	20:00		Night
112	2011	0238	Yes	25	600	294	306	12	288	0	0	9	0	2	1	1	0	0	14	Winter	2011-07-24	July	20:30		Night
113	2011	0240	Yes	4	96	294	-198	3	72	1	0	0	0	0	0	0	0	0	5	Winter	2011-07-24	July	21:00		Night
114	2011	0242	Yes	5	120	294	-174	1	24	0	0	0	0	2	0	0	0	2	2	Winter	2011-07-24	July	21:30		Night
115	2011	0244	Yes	4	96	294	-198	1	24	0	0	3	0	0	0	0	0	0	3	Winter	2011-07-24	July	22:00		Night
116	2011	0246	Yes	12	288	294	-6	4	96	0	1	2	0	0	0	1	0	4	7	Winter	2011-07-24	July	22:30		Night
117	2011	0248	Yes	9	216	294	-78	3	72	0	0	1	0	3	0	2	0	0	6	Winter	2011-07-24	July	23:00		Night
118	2011	0250	Yes	8	192	294	-102	6	144	0	0	0	0	2	0	0	0	0	7	Winter	2011-07-24	July	23:30		Night
119	2011	0252	Yes	9	216	243	-27	6	144	0	0	0	0	3	0	0	0	0	10	Winter	2011-07-25	July	00:00		Night
120	2011	0254	Yes	16	384	243	141	11	264	0	0	0	0	0	0	1	0	4	11	Winter	2011-07-25	July	00:30		Night
121	2011	0256	Yes	17	408	243	165	2	48	0	2	3	0	1	4	2	0	3	5	Winter	2011-07-25	July	01:00		Night
122	2011	0258	Yes	20	480	243	237	7	168	0	0	2	0	7	1	0	2	1	13	Winter	2011-07-25	July	01:30		Night
123	2011	0260	Yes	16	384	243	141	13	312	0	0	0	0	0	0	3	0	0	13	Winter	2011-07-25	July	02:00		Night
124	2011	0262	Yes	21	504	243	261	12	288	1	0	6	0	2	0	0	0	0	19	Winter	2011-07-25	July	02:30		Night
125	2011	0264	Yes	10	240	243	-3	8	192	1	0	0	0	1	0	0	0	0	12	Winter	2011-07-25	July	03:00		Night
126	2011	0266	Yes	13	312	243	69	1	24	0	2	0	0	2	0	6	0	2	4	Winter	2011-07-25	July	03:30		Night
127	2011	0268	Yes	10	240	243	-3	5	120	0	0	2	0	0	0	3	0	0	6	Winter	2011-07-25	July	04:00		Night
128	2011	0270	Yes	26	624	243	381	4	96	0	0	0	0	0	18	2	0	2	6	Winter	2011-07-25	July	04:30		Night
129	2011	0272	Yes	14	336	243	93	4	96	2	0	3	0	0	0	3	0	2	12	Winter	2011-07-25	July	05:00		Night
130	2011	0274	Yes	17	408	243	165	6	144	0	1	2	0	0	6	0	0	2	11	Winter	2011-07-25	July	05:30		Night
131	2011	0276	Yes	5	120	243	-123	0	0	0	0	0	0	0	0	0	0	5	0	Winter	2011-07-25	July	06:00		Night
132	2011	0278	Yes	4	96	243	-147	0	0	0	0	0	0	0	0	0	0	4	0	Winter	2011-07-25	July	06:30		Night
133	2011	0280	Yes	14	336	243	93	5	120	1	0	5	0	0	0	0	0	3	4	Winter	2011-07-25	July	07:00		Night
134	2011	0282	Yes	10	240	243	-3	1	24	0	0	0	0	1	0	4	0	4	0	Winter	2011-07-25	July	07:30	7:22 begin	Dawn
135	2011	0284	Yes	5	120	243	-123	2	48	0	0	0	0	2	0	0	0	1	4	Winter	2011-07-25	July	08:00		Dawn
136	2011	0286	Yes	13	312	243	69	3	72	2	0	0	0	3	1	2	0	2	5	Winter	2011-07-25	July	08:30	8:39 rise	Dawn
137	2011	0288	Yes	5	120	243	-123	5	120	0	0	0	0	0	0	0	0	0	0	Winter	2011-07-25	July	09:00		Morning
138	2011	0290	Yes	5	120	243	-123	0	0	3	0	0	0	2	0	0	0	0	1	Winter	2011-07-25	July	09:30		Morning
139	2011	0292	Yes	3	72	243	-171	1	24	0	0	2	0	0	0	0	0	0	1	Winter	2011-07-25	July	10:00		Morning
140	2011	0294	Yes	10	240	243	-3	7	168	0	0	2	1	0	0	0	0	0	6	Winter	2011-07-25	July	10:30		Morning
141	2011	0296	Yes	2	48	243	-195	2	48	0	0	0	0	0	0	0	0	0	4	Winter	2011-07-25	July	11:00		Morning
142	2011	0298	Yes	18	432	243	189	17	408	0	1	0	0	0	0	0	0	0	17	Winter	2011-07-25	July	11:30		Morning
143	2011	0300	Yes	2	48	243	-195	0	0	0	0	0	0	2	0	0		0	3	Winter	2011-07-25	July	12:00		Morning
144	2011	0302	Yes	5	120	243	-123	4	96	0	0	0	0	0	0	0	0	1	4	Winter	2011-07-25	July	12:30		Morning
145	2011	0304	Yes	4	96	243	-147	4	96	0	0	0	0	0	0	0	0	0	2	Winter	2011-07-25	July	13:00	13:01 transit	Afternoon
146	2011	0306	Yes	13	312	243	69	4	96	0	8	0	0	0	0	0	0	1	1	Winter	2011-07-25	July	13:30		Afternoon
147	2011	0308	Yes	3	72	243	-171	3	72	0	0	0	0	0	0	0	0	0	5	Winter	2011-07-25	July	14:00		Afternoon
148	2011	0310	Yes	4	96	243	-147	0	0	0	0	2	0	2	0	0	0	0	1	Winter	2011-07-25	July	14:30		Afternoon
149	2011	0312	No	0	0	243	-243	0	0	0	0	0	0	0	0	0	0	0	1	Winter	2011-07-25	July	15:00		Afternoon
150	2011	0314	Yes	9	216	243	-27	3	72	2	0	4	0	0	0	0	0	0	3	Winter	2011-07-25	July	15:30		Afternoon
151	2011	0316	No	0	0	243	-243	0	0	0	0	0	0	0	0	0	0	0	1	Winter	2011-07-25	July	16:00		Afternoon
152	2011	0318	Yes	10	240	243	-3	10	240	0	0	0	0	0	0	0	0	0	12	Winter	2011-07-25	July	16:30		Afternoon
153	2011	0320	Yes	17	408	243	165	11	264	2	0	0	0	4	0	0	0	0	12	Winter	2011-07-25	July	17:00		Afternoon
154	2011	0322	Yes	27	648	243	405	15	360	3	0	3	0	1	5	0	0	0	13	Winter	2011-07-25	July	17:30	17:24 set	Dusk
155	2011	0324	Yes	8	192	243	-51	7	168	1	0	0	0	0	0	0	0	0	9	Winter	2011-07-25	July	18:00		Dusk
156	2011	0326	Yes	1	24	243	-219	1	24	0	0	0	0	0	0	0	0	0	2	Winter	2011-07-25	July	18:30	18:41 end	Dusk
157	2011	0328	Yes	1	24	243	-219	0	0	0	0	0	0	1	0	0	0	0	3	Winter	2011-07-25	July	19:00		Night
158	2011	0330	Yes	3	72	243	-171	2	48	0	0	0	0	1	0	0	0	0	3	Winter	2011-07-25	July	19:30		Night
159	2011	0332	Yes	1	24	243	-219	1	24	0	0	0	0	0	0	0	0	0	4	Winter	2011-07-25	July	20:00		Night
160	2011	0334	Yes	9	216	243	-27	9	216	0	0	0	0	0	0	0	0	0	12	Winter	2011-07-25	July	20:30		Night
161	2011	0336	Yes	10	240	243	-3	6	144	0	0	3	0	0	0	1	0	0	8	Winter	2011-07-25	July	21:00		Night
162	2011	0338	Yes	11	264	243	21	8	192	1	0	2	0	0	0	0	0	0	13	Winter	2011-07-25	July	21:30		Night
163	2011	0340	Yes	15	360	243	117	6	144	3	3	0	0	0	0	3	0	0	5	Winter	2011-07-25	July	22:00		Night
164	2011	0342	Yes	20	480	243	237	5	120	0	6	0	0	2	7	0	0	0	8	Winter	2011-07-25	July	22:30		Night
165	2011	0344	Yes	16	384	243	141	11	264	2	0	0	0	0	3	0	0	0	11	Winter	2011-07-25	July	23:00		Night
166	2011	0346	Yes	14	336	243	93	4	96	2	2	0	0	1	2	3	0	0	9	Winter	2011-07-25	July	23:30		Night
167	2011	0348	Yes	17	408	160.5	247.5	8	192	5	0	0	0	4	0	0	0	0	9	Winter	2011-07-26	July	00:00		Night
168	2011	0350	No	0	0	160.5	-160.5	0	0	0	0	0	0	0	0	0	0	0	4	Winter	2011-07-26	July	00:30		Night
169	2011	0352	No	3	72	160.5	-88.5	1	24	0	2	0	0	0	0	0	0	0	6	Winter	2011-07-26	July	01:00		Night
170	2011	0354	Yes	1	24	160.5	-136.5	0	0	0	0	0	0	1	0	0	0	0	1	Winter	2011-07-26	July	01:30		Night
171	2011	0356	Yes	6	144	160.5	-16.5	4	96	0	0	0	0	2	0	0	0	0	5	Winter	2011-07-26	July	02:00		Night
172	2011	0358	Yes	10	240	160.5	79.5	8	192	0	0	0	0	2	0	0	0	0	12	Winter	2011-07-26	July	02:30		Night
173	2011	0360	Yes	4	96	160.5	-64.5	3	72	0	0	1	0	0	0	0	0	0	10	Winter	2011-07-26	July	03:00		Night
174	2011	0362	Yes	2	48	160.5	-112.5	0	0	0	0	0	0	2	0	0	0	0	6	Winter	2011-07-26	July	03:30		Night
175	2011	0364	Yes	5	120	160.5	-40.5	2	48	0	0	0	0	3	0	0	0	0	7	Winter	2011-07-26	July	04:00		Night
176	2011	0366	Yes	3	72	160.5	-88.5	1	24	0	0	0	1	0	0	0	0	1	4	Winter	2011-07-26	July	04:30		Night
177	2011	0368	Yes	15	360	160.5	199.5	6	144	0	0	5	0	4	0	0	0	0	9	Winter	2011-07-26	July	05:00		Night
178	2011	0370	Yes	5	120	160.5	-40.5	2	48	1	0	0	0	2	0	0	0	0	5	Winter	2011-07-26	July	05:30		Night
179	2011	0372	Yes	15	360	160.5	199.5	4	96	7	0	2	0	1	0	1	0	0	8	Winter	2011-07-26	July	06:00		Night
180	2011	0374	Yes	12	288	160.5	127.5	3	72	0	0	5	0	2	0	0	0	2	7	Winter	2011-07-26	July	06:30		Night
181	2011	0376	Yes	2	48	160.5	-112.5	2	48	0	0	0	0	0	0	0	0	0	3	Winter	2011-07-26	July	07:00		Night
182	2011	0378	Yes	5	120	160.5	-40.5	3	72	0	0	2	0	0	0	0	0	0	5	Winter	2011-07-26	July	07:30	7:21 begin	Dawn
183	2011	0380	Yes	9	216	160.5	55.5	3	72	6	0	0	0	0	0	0	0	0	5	Winter	2011-07-26	July	08:00		Dawn
184	2011	0382	No	0	0	160.5	-160.5	0	0	0	0	0	0	0	0	0	0	0	1	Winter	2011-07-26	July	08:30	8:38 rise	Dawn
185	2011	0384	No	0	0	160.5	-160.5	0	0	0	0	0	0	0	0	0	0	0	1	Winter	2011-07-26	July	09:00		Morning
186	2011	0386	Yes	10	240	160.5	79.5	6	144	0	0	0	0	0	0	0	0	4	7	Winter	2011-07-26	July	09:30		Morning
187	2011	0388	Yes	5	120	160.5	-40.5	5	120	0	0	0	0	0	0	0	0	0	7	Winter	2011-07-26	July	10:00		Morning
188	2011	0390	Yes	1	24	160.5	-136.5	1	24	0	0	0	0	0	0	0	0	0	2	Winter	2011-07-26	July	10:30		Morning
189	2011	0392	Yes	3	72	160.5	-88.5	2	48	0	0	1	0	0	0	0	0	0	3	Winter	2011-07-26	July	11:00		Morning
190	2011	0394	Yes	2	48	160.5	-112.5	2	48	0	0	0	0	0	0	0	0	0	2	Winter	2011-07-26	July	11:30		Morning
191	2011	0396	Yes	11	264	160.5	103.5	6	144	1	0	4	0	0	0	0	0	0	7	Winter	2011-07-26	July	12:00		Morning
192	2011	0398	Yes	8	192	160.5	31.5	6	144	0	0	2	0	0	0	0	0	0	12	Winter	2011-07-26	July	12:30		Morning
193	2011	0400	Yes	1	24	160.5	-136.5	1	24	0	0	0	0	0	0	0	0	0	1	Winter	2011-07-26	July	13:00	13:01 transit	Afternoon
194	2011	0402	Yes	6	144	160.5	-16.5	6	144	0	0	0	0	0	0	0	0	0	7	Winter	2011-07-26	July	13:30		Afternoon
195	2011	0404	Yes	5	120	160.5	-40.5	3	72	0	0	2	0	0	0	0	0	0	3	Winter	2011-07-26	July	14:00		Afternoon
196	2011	0406	Yes	4	96	160.5	-64.5	4	96	0	0	0	0	0	0	0	0	0	4	Winter	2011-07-26	July	14:30		Afternoon
197	2011	0408	Yes	5	120	160.5	-40.5	3	72	0	0	2	0	0	0	0	0	0	3	Winter	2011-07-26	July	15:00		Afternoon
198	2011	0410	Yes	5	120	160.5	-40.5	1	24	0	0	4	0	0	0	0	0	0	1	Winter	2011-07-26	July	15:30		Afternoon
199	2011	0412	Yes	7	168	160.5	7.5	3	72	1	2	0	0	0	0	1	0	0	4	Winter	2011-07-26	July	16:00		Afternoon
200	2011	0414	Yes	15	360	160.5	199.5	6	144	2	0	5	0	0	1	0	0	1	9	Winter	2011-07-26	July	16:30		Afternoon
201	2011	0416	Yes	4	96	160.5	-64.5	4	96	0	0	0	0	0	0	0	0	0	6	Winter	2011-07-26	July	17:00		Afternoon
202	2011	0418	Yes	3	72	160.5	-88.5	2	48	0	0	1	0	0	0	0	0	0	5	Winter	2011-07-26	July	17:30	17:26 set	Dusk
203	2011	0420	Yes	7	168	160.5	7.5	4	96	0	0	0	0	0	0	0	0	3	6	Winter	2011-07-26	July	18:00		Dusk
204	2011	0422	Yes	16	384	160.5	223.5	12	288	0	2	2	0	0	0	0	0	0	15	Winter	2011-07-26	July	18:30	18:42 end	Dusk
205	2011	0424	Yes	5	120	160.5	-40.5	3	72	0	0	2	0	0	0	0	0	0	11	Winter	2011-07-26	July	19:00		Night
206	2011	0426	Yes	13	312	160.5	151.5	2	48	0	4	2	0	1	4	0	0	0	6	Winter	2011-07-26	July	19:30		Night
207	2011	0428	Yes	8	192	160.5	31.5	4	96	0	0	2	0	2	0	0	0	0	8	Winter	2011-07-26	July	20:00		Night
208	2011	0430	Yes	7	168	160.5	7.5	3	72	0	0	2	0	2	0	0	0	0	8	Winter	2011-07-26	July	20:30		Night
209	2011	0432	Yes	9	216	160.5	55.5	2	48	0	0	3	0	0	2	2	0	0	9	Winter	2011-07-26	July	21:00		Night
210	2011	0434	Yes	18	432	160.5	271.5	12	288	0	0	4	0	1	0	1	0	0	23	Winter	2011-07-26	July	21:30		Night
211	2011	0436	Yes	11	264	160.5	103.5	1	24	0	3	0	0	1	0	3	0	3	1	Winter	2011-07-26	July	22:00		Night
212	2011	0438	Yes	10	240	160.5	79.5	1	24	0	0	1	0	2	6	0	0	0	3	Winter	2011-07-26	July	22:30		Night
213	2011	0440	Yes	5	120	160.5	-40.5	2	48	1	0	0	0	0	2	0	0	0	5	Winter	2011-07-26	July	23:00		Night
214	2011	0442	Yes	3	72	160.5	-88.5	0	0	0	0	0	0	3	0	0	0	0	0	Winter	2011-07-26	July	23:30		Night
215	2011	0444	Yes	5	120	161.5	-41.5	0	0	1	0	0	0	4	0	0	0	0	2	Winter	2011-07-27	July	00:00		Night
216	2011	0446	Yes	11	264	161.5	102.5	1	24	2	0	4	0	2	0	0	0	2	3	Winter	2011-07-27	July	00:30		Night
217	2011	0448	Yes	10	240	161.5	78.5	8	192	0	0	1	0	0	0	1	0	0	14	Winter	2011-07-27	July	01:00		Night
218	2011	0450	Yes	9	216	161.5	54.5	5	120	5	0	0	0	5	0	0	0	0	0	Winter	2011-07-27	July	01:30		Night
219	2011	0452	Yes	7	168	161.5	6.5	6	144	0	0	0	0	0	0	0	0	1	9	Winter	2011-07-27	July	02:00		Night
220	2011	0454	Yes	5	120	161.5	-41.5	3	72	0	0	2	0	0	0	0	0	0	9	Winter	2011-07-27	July	02:30		Night
221	2011	0456	Yes	9	216	161.5	54.5	9	216	0	0	0	0	0	0	0	0	0	10	Winter	2011-07-27	July	03:00		Night
222	2011	0458	No	0	0	161.5	-161.5	0	0	0	0	0	0	0	0	0	0	0	1	Winter	2011-07-27	July	03:30		Night
223	2011	0460	Yes	4	96	161.5	-65.5	4	96	0	0	0	0	0	0	0	0	0	6	Winter	2011-07-27	July	04:00		Night
224	2011	0462	Yes	2	48	161.5	-113.5	0	0	0	0	0	0	0	0	0	0	2	2	Winter	2011-07-27	July	04:30		Night
225	2011	0464	No	0	0	161.5	-161.5	0	0	0	0	0	0	0	0	0	0	0	0	Winter	2011-07-27	July	05:00		Night
226	2011	0466	Yes	6	144	161.5	-17.5	3	72	0	0	0	0	2	0	0	0	1	2	Winter	2011-07-27	July	05:30		Night
227	2011	0468	No	0	0	161.5	-161.5	0	0	0	0	0	0	0	0	0	0	0	0	Winter	2011-07-27	July	06:00		Night
228	2011	0470	No	0	0	161.5	-161.5	0	0	0	0	0	0	0	0	0	0	0	1	Winter	2011-07-27	July	06:30		Night
229	2011	0472	Yes	1	24	161.5	-137.5	1	24	0	0	0	0	0	0	0	0	0	2	Winter	2011-07-27	July	07:00		Night
230	2011	0474	Yes	6	144	161.5	-17.5	0	0	0	1	0	0	5	0	0	0	0	1	Winter	2011-07-27	July	07:30	7:20 begin	Dawn
231	2011	0476	Yes	12	288	161.5	126.5	2	48	0	6	0	0	4	0	0	0	0	3	Winter	2011-07-27	July	08:00		Dawn
232	2011	0478	Yes	21	504	161.5	342.5	8	192	0	1	0	0	11	0	1	0	0	6	Winter	2011-07-27	July	08:30	8:36 rise	Dawn
233	2011	0480	Yes	24	576	161.5	414.5	7	168	0	0	4	0	4	0	0	0	9	4	Winter	2011-07-27	July	09:00		Morning
234	2011	0482	Yes	10	240	161.5	78.5	1	24	1	0	1	0	2	5	0	0	0	3	Winter	2011-07-27	July	09:30		Morning
235	2011	0484	Yes	10	240	161.5	78.5	3	72	0	1	2	0	0	2	2	0	0	5	Winter	2011-07-27	July	10:00		Morning
236	2011	0486	No	0	0	161.5	-161.5	0	0	0	0	0	0	0	0	0	0	0	0	Winter	2011-07-27	July	10:30		Morning
237	2011	0488	Yes	5	120	161.5	-41.5	1	24	0	4	0	0	0	0	0	0	0	0	Winter	2011-07-27	July	11:00		Morning
238	2011	0490	Yes	1	24	161.5	-137.5	0	0	0	0	0	0	0	0	0	0	1	0	Winter	2011-07-27	July	11:30		Morning
239	2011	0492	Yes	3	72	161.5	-89.5	2	48	1	0	0	0	0	0	0	0	0	3	Winter	2011-07-27	July	12:00		Morning
240	2011	0494	Yes	6	144	161.5	-17.5	5	120	0	0	1	0	0	0	0	0	0	6	Winter	2011-07-27	July	12:30		Morning
241	2011	0496	Yes	5	120	161.5	-41.5	2	48	0	0	0	0	0	0	1	0	2	2	Winter	2011-07-27	July	13:00	13:01 transit	Afternoon
242	2011	0498	No	0	0	161.5	-161.5	0	0	0	0	0	0	0	0	0	0	0	2	Winter	2011-07-27	July	13:30		Afternoon
243	2011	0500	Yes	3	72	161.5	-89.5	0	0	0	0	0	0	1	0	0	0	2	2	Winter	2011-07-27	July	14:00		Afternoon
244	2011	0502	Yes	5	120	161.5	-41.5	5	120	0	0	0	0	0	0	0	0	0	6	Winter	2011-07-27	July	14:30		Afternoon
245	2011	0504	Yes	6	144	161.5	-17.5	1	24	0	1	0	0	0	0	0	0	4	2	Winter	2011-07-27	July	15:00		Afternoon
246	2011	0506	Yes	1	24	161.5	-137.5	0	0	0	0	0	0	0	0	0	0	1	4	Winter	2011-07-27	July	15:30		Afternoon
247	2011	0508	Yes	1	24	161.5	-137.5	1	24	0	0	0	0	0	0	0	0	0	7	Winter	2011-07-27	July	16:00		Afternoon
248	2011	0510	Yes	12	288	161.5	126.5	1	24	2	0	0	0	9	0	0	0	0	1	Winter	2011-07-27	July	16:30		Afternoon
249	2011	0512	Yes	5	120	161.5	-41.5	2	48	0	1	1	0	1	0	0	0	0	4	Winter	2011-07-27	July	17:00		Afternoon
250	2011	0514	Yes	8	192	161.5	30.5	7	168	0	0	0	0	1	0	0	0	0	11	Winter	2011-07-27	July	17:30	17:27 set	Dusk
251	2011	0516	Yes	18	432	161.5	270.5	18	432	0	0	0	0	0	0	0	0	0	22	Winter	2011-07-27	July	18:00		Dusk
252	2011	0518	Yes	12	288	161.5	126.5	3	72	0	0	0	0	3	2	0	0	4	6	Winter	2011-07-27	July	18:30	18:44 end	Dusk
253	2011	0520	Yes	16	384	161.5	222.5	7	168	0	2	2	0	0	2	1	0	2	12	Winter	2011-07-27	July	19:00		Night
254	2011	0522	Yes	2	48	161.5	-113.5	2	48	0	0	0	0	0	0	0	0	0	4	Winter	2011-07-27	July	19:30		Night
255	2011	0524	Yes	7	168	161.5	6.5	4	96	0	1	0	0	1	0	1	0	0	8	Winter	2011-07-27	July	20:00		Night
256	2011	0526	Yes	7	168	161.5	6.5	3	72	0	0	0	0	3	0	0	1	0	5	Winter	2011-07-27	July	20:30		Night
257	2011	0528	Yes	13	312	161.5	150.5	11	264	0	0	2	0	0	0	0	0	0	12	Winter	2011-07-27	July	21:00		Night
258	2011	0530	Yes	5	120	161.5	-41.5	5	120	0	0	0	0	0	0	0	0	0	3	Winter	2011-07-27	July	21:30		Night
259	2011	0532	Yes	5	120	161.5	-41.5	5	120	0	0	0	0	0	0	0	0	0	6	Winter	2011-07-27	July	22:00		Night
260	2011	0534	Yes	15	360	161.5	198.5	12	288	2	0	1	0	0	0	0	0	0	14	Winter	2011-07-27	July	22:30		Night
261	2011	0536	Yes	6	144	161.5	-17.5	4	96	0	0	0	0	0	2	0	0	0	9	Winter	2011-07-27	July	23:00		Night
262	2011	0538	Yes	4	96	161.5	-65.5	2	48	0	0	2	0	0	0	0	0	0	2	Winter	2011-07-27	July	23:30		Night
263	2011	0540	Yes	5	120	239.5	-119.5	4	96	0	0	0	0	0	0	0	0	1	5	Winter	2011-07-28	July	00:00		Night
264	2011	0542	Yes	4	96	239.5	-143.5	4	96	0	0	0	0	0	0	0	0	0	6	Winter	2011-07-28	July	00:30		Night
265	2011	0544	No	0	0	239.5	-239.5	0	0	0	0	0	0	0	0	0	0	0	2	Winter	2011-07-28	July	01:00		Night
266	2011	0546	Yes	6	144	239.5	-95.5	0	0	5	0	1	0	0	0	0	0	0	1	Winter	2011-07-28	July	01:30		Night
267	2011	0548	Yes	1	24	239.5	-215.5	1	24	0	0	0	0	0	0	0	0	0	2	Winter	2011-07-28	July	02:00		Night
268	2011	0550	Yes	13	312	239.5	72.5	3	72	0	10	0	0	0	0	0	0	0	7	Winter	2011-07-28	July	02:30		Night
269	2011	0552	Yes	3	72	239.5	-167.5	0	0	0	0	2	1	0	0	0	0	0	4	Winter	2011-07-28	July	03:00		Night
270	2011	0554	Yes	3	72	239.5	-167.5	3	72	0	0	0	0	0	0	0	0	0	6	Winter	2011-07-28	July	03:30		Night
271	2011	0556	No	0	0	239.5	-239.5	0	0	0	0	0	0	0	0	0	0	0	2	Winter	2011-07-28	July	04:00		Night
272	2011	0558	Yes	3	72	239.5	-167.5	2	48	0	0	1	0	0	0	0	0	0	8	Winter	2011-07-28	July	04:30		Night
273	2011	0560	Yes	5	120	239.5	-119.5	5	120	0	0	0	0	0	0	0	0	0	9	Winter	2011-07-28	July	05:00		Night
274	2011	0562	Yes	1	24	239.5	-215.5	1	24	0	0	0	0	0	0	0	0	0	3	Winter	2011-07-28	July	05:30		Night
275	2011	0564	Yes	3	72	239.5	-167.5	1	24	0	0	0	0	2	0	0	0	0	3	Winter	2011-07-28	July	06:00		Night
276	2011	0566	Yes	7	168	239.5	-71.5	1	24	0	0	0	0	4	1	1	0	0	5	Winter	2011-07-28	July	06:30		Night
277	2011	0568	Yes	6	144	239.5	-95.5	2	48	0	0	1	0	3	0	0	0	0	1	Winter	2011-07-28	July	07:00		Night
278	2011	0570	Yes	11	264	239.5	24.5	1	24	0	0	1	0	4	5	0	0	0	1	Winter	2011-07-28	July	07:30	7:19 begin	Dawn
279	2011	0572	Yes	1	24	239.5	-215.5	0	0	0	1	0	0	0	0	0	0	0	0	Winter	2011-07-28	July	08:00		Dawn
280	2011	0574	Yes	15	360	239.5	120.5	2	48	0	0	2	0	0	11	0	0	0	8	Winter	2011-07-28	July	08:30	8:35 rise	Dawn
281	2011	0576	Yes	1	24	239.5	-215.5	0	0	0	0	1	0	0	0	0	0	0	0	Winter	2011-07-28	July	09:00		Morning
282	2011	0578	Yes	1	24	239.5	-215.5	0	0	0	0	0	0	0	0	0	0	1	0	Winter	2011-07-28	July	09:30		Morning
283	2011	0580	Yes	2	48	239.5	-191.5	0	0	0	0	0	0	2	0	0	0	0	1	Winter	2011-07-28	July	10:00		Morning
284	2011	0582	No	0	0	239.5	-239.5	0	0	0	0	0	0	1	0	0	0	0	0	Winter	2011-07-28	July	10:30		Morning
285	2011	0584	No	0	0	239.5	-239.5	0	0	0	0	0	0	0	0	0	0	0	1	Winter	2011-07-28	July	11:00		Morning
286	2011	0586	No	0	0	239.5	-239.5	0	0	0	0	0	0	0	0	0	0	0	0	Winter	2011-07-28	July	11:30		Morning
287	2011	0588	No	0	0	239.5	-239.5	0	0	0	0	0	0	0	0	0	0	0	0	Winter	2011-07-28	July	12:00		Morning
288	2011	0590	Yes	7	168	239.5	-71.5	1	24	0	0	0	0	0	0	0	0	6	1	Winter	2011-07-28	July	12:30		Morning
289	2011	0592	Yes	18	432	239.5	192.5	0	0	0	9	0	0	1	6	0	0	2	0	Winter	2011-07-28	July	13:00	13:01 transit	Afternoon
290	2011	0594	Yes	15	360	239.5	120.5	5	120	0	0	1	0	0	5	0	0	4	7	Winter	2011-07-28	July	13:30		Afternoon
291	2011	0596	Yes	12	288	239.5	48.5	3	72	2	0	0	0	1	5	0	0	1	2	Winter	2011-07-28	July	14:00		Afternoon
292	2011	0598	Yes	20	480	239.5	240.5	0	0	0	1	0	0	0	15	0	0	4	5	Winter	2011-07-28	July	14:30		Afternoon
293	2011	0600	Yes	4	96	239.5	-143.5	0	0	0	0	0	0	0	2	0	0	2	4	Winter	2011-07-28	July	15:00		Afternoon
294	2011	0602	Yes	9	216	239.5	-23.5	2	48	2	0	2	0	0	1	1	0	1	6	Winter	2011-07-28	July	15:30		Afternoon
295	2011	0604	Yes	16	384	239.5	144.5	2	48	1	0	0	0	1	10	2	0	0	4	Winter	2011-07-28	July	16:00		Afternoon
296	2011	0606	Yes	7	168	239.5	-71.5	2	48	0	0	2	0	3	0	0	0	0	2	Winter	2011-07-28	July	16:30		Afternoon
297	2011	0608	Yes	10	240	239.5	0.5	3	72	0	0	0	0	4	0	3	0	0	6	Winter	2011-07-28	July	17:00		Afternoon
298	2011	0610	Yes	22	528	239.5	288.5	4	96	3	0	0	0	4	11	0	0	0	12	Winter	2011-07-28	July	17:30	17:28 set	Dusk
299	2011	0612	Yes	16	384	239.5	144.5	4	96	2	0	0	0	0	8	0	0	2	5	Winter	2011-07-28	July	18:00		Dusk
300	2011	0614	Yes	13	312	239.5	72.5	1	24	0	0	0	0	0	6	0	0	6	2	Winter	2011-07-28	July	18:30	18:45 end	Dusk
301	2011	0616	Yes	27	648	239.5	408.5	4	96	2	3	0	0	3	4	3	0	8	4	Winter	2011-07-28	July	19:00		Night
302	2011	0618	Yes	43	1032	239.5	792.5	7	168	2	11	0	0	11	2	0	0	10	5	Winter	2011-07-28	July	19:30		Night
303	2011	0620	Yes	22	528	239.5	288.5	3	72	2	1	0	0	0	6	6	0	4	7	Winter	2011-07-28	July	20:00		Night
304	2011	0622	Yes	14	336	239.5	96.5	4	96	2	2	0	0	0	2	0	0	4	6	Winter	2011-07-28	July	20:30		Night
305	2011	0624	Yes	8	192	239.5	-47.5	2	48	0	0	0	0	1	0	1	0	4	1	Winter	2011-07-28	July	21:00		Night
306	2011	0626	Yes	9	216	239.5	-23.5	0	0	2	0	1	0	2	0	0	0	4	1	Winter	2011-07-28	July	21:30		Night
307	2011	0628	Yes	3	72	239.5	-167.5	1	24	0	0	0	0	0	0	1	0	1	1	Winter	2011-07-28	July	22:00		Night
308	2011	0630	Yes	33	792	239.5	552.5	1	24	0	0	1	0	5	4	3	0	19	1	Winter	2011-07-28	July	22:30		Night
309	2011	0632	Yes	27	648	239.5	408.5	7	168	1	1	10	0	3	0	0	0	5	12	Winter	2011-07-28	July	23:00		Night
310	2011	0634	Yes	33	792	239.5	552.5	2	48	3	0	4	0	4	2	6	0	12	10	Winter	2011-07-28	July	23:30		Night
311	2011	0636	Yes	19	456	234.5	221.5	2	48	0	2	9	0	0	0	0	0	6	7	Winter	2011-07-29	July	00:00		Night
312	2011	0638	Yes	28	672	234.5	437.5	3	72	0	0	5	0	13	3	0	0	4	9	Winter	2011-07-29	July	00:30		Night
313	2011	0640	Yes	25	600	234.5	365.5	2	48	3	0	7	0	0	4	3	0	6	6	Winter	2011-07-29	July	01:00		Night
314	2011	0642	Yes	19	456	234.5	221.5	0	0	1	0	6	0	5	3	1	0	3	1	Winter	2011-07-29	July	01:30		Night
315	2011	0644	Yes	20	480	234.5	245.5	2	48	0	3	2	0	7	0	0	0	6	8	Winter	2011-07-29	July	02:00		Night
316	2011	0646	Yes	13	312	234.5	77.5	1	24	1	6	3	0	0	0	0	0	2	3	Winter	2011-07-29	July	02:30		Night
317	2011	0648	Yes	28	672	234.5	437.5	7	168	0	0	0	0	16	1	0	0	4	5	Winter	2011-07-29	July	03:00		Night
318	2011	0650	Yes	8	192	234.5	-42.5	5	120	2	0	1	0	0	0	0	0	0	1	Winter	2011-07-29	July	03:30		Night
319	2011	0652	Yes	11	264	234.5	29.5	1	24	0	2	0	0	7	0	1	0	0	1	Winter	2011-07-29	July	04:00		Night
320	2011	0654	Yes	23	552	234.5	317.5	10	240	4	0	7	0	2	0	0	0	0	16	Winter	2011-07-29	July	04:30		Night
321	2011	0656	Yes	26	624	234.5	389.5	3	72	2	0	7	0	8	0	3	0	3	6	Winter	2011-07-29	July	05:00		Night
322	2011	0658	Yes	22	528	234.5	293.5	10	240	4	0	2	0	6	0	0	0	0	13	Winter	2011-07-29	July	05:30		Night
323	2011	0660	Yes	22	528	234.5	293.5	3	72	0	1	16	0	0	0	0	0	2	7	Winter	2011-07-29	July	06:00		Night
324	2011	0662	Yes	28	672	234.5	437.5	8	192	3	1	9	1	6	0	0	0	0	11	Winter	2011-07-29	July	06:30		Night
325	2011	0664	Yes	13	312	234.5	77.5	2	48	0	0	1	0	4	2	2	0	2	6	Winter	2011-07-29	July	07:00		Night
326	2011	0666	Yes	6	144	234.5	-90.5	0	0	0	0	3	0	1	1	1	0	0	2	Winter	2011-07-29	July	07:30	7:18 begin	Dawn
327	2011	0668	Yes	21	504	234.5	269.5	0	0	0	12	6	0	2	1	0	0	0	1	Winter	2011-07-29	July	08:00		Dawn
328	2011	0670	Yes	8	192	234.5	-42.5	0	0	1	3	2	0	0	0	2	0	0	1	Winter	2011-07-29	July	08:30	8:34 rise	Dawn
329	2011	0672	Yes	1	24	234.5	-210.5	0	0	0	0	1	0	0	0	0	0	0	1	Winter	2011-07-29	July	09:00		Morning
330	2011	0674	Yes	8	192	234.5	-42.5	2	48	0	0	6	0	0	0	0	0	0	2	Winter	2011-07-29	July	09:30		Morning
331	2011	0676	Yes	22	528	234.5	293.5	2	48	3	0	9	0	2	0	2	0	4	5	Winter	2011-07-29	July	10:00		Morning
332	2011	0678	Yes	5	120	234.5	-114.5	1	24	0	0	0	0	1	3	0	0	0	4	Winter	2011-07-29	July	10:30		Morning
333	2011	0680	Yes	2	48	234.5	-186.5	0	0	0	0	1	0	1	0	0	0	0	0	Winter	2011-07-29	July	11:00		Morning
334	2011	0682	Yes	2	48	234.5	-186.5	2	48	0	0	0	0	0	0	0	0	0	1	Winter	2011-07-29	July	11:30		Morning
335	2011	0684	No	0	0	234.5	-234.5	0	0	0	0	0	0	0	0	0	0	0	2	Winter	2011-07-29	July	12:00		Morning
336	2011	0686	No	0	0	234.5	-234.5	0	0	0	0	0	0	0	0	0	0	0	0	Winter	2011-07-29	July	12:30		Morning
337	2011	0688	Yes	2	48	234.5	-186.5	0	0	0	0	0	0	0	0	2	0	0	0	Winter	2011-07-29	July	13:00	13:01 transit	Afternoon
338	2011	0690	No	0	0	234.5	-234.5	0	0	0	0	0	0	0	0	0	0	0	1	Winter	2011-07-29	July	13:30		Afternoon
339	2011	0692	No	0	0	234.5	-234.5	0	0	0	0	0	0	0	0	0	0	0	4	Winter	2011-07-29	July	14:00		Afternoon
340	2011	0694	No	0	0	234.5	-234.5	0	0	0	0	0	0	0	0	0	0	0	5	Winter	2011-07-29	July	14:30		Afternoon
341	2011	0696	Yes	4	96	234.5	-138.5	2	48	0	0	2	0	0	0	0	0	0	2	Winter	2011-07-29	July	15:00		Afternoon
342	2011	0698	Yes	3	72	234.5	-162.5	3	72	0	0	0	0	0	0	0	0	0	5	Winter	2011-07-29	July	15:30		Afternoon
343	2011	0700	Yes	13	312	234.5	77.5	6	144	0	0	3	0	0	0	0	0	4	7	Winter	2011-07-29	July	16:00		Afternoon
344	2011	0702	Yes	7	168	234.5	-66.5	5	120	0	0	0	0	0	0	2	0	0	4	Winter	2011-07-29	July	16:30		Afternoon
345	2011	0704	Yes	6	144	234.5	-90.5	1	24	3	0	0	0	2	0	0	0	0	0	Winter	2011-07-29	July	17:00		Afternoon
346	2011	0706	Yes	10	240	234.5	5.5	2	48	0	6	0	0	2	0	0	0	0	3	Winter	2011-07-29	July	17:30	17:30 set	Dusk
347	2011	0708	Yes	3	72	234.5	-162.5	0	0	0	0	0	0	3	0	0	0	0	2	Winter	2011-07-29	July	18:00		Dusk
348	2011	0710	Yes	9	216	234.5	-18.5	7	168	1	0	0	0	1	0	0	0	0	7	Winter	2011-07-29	July	18:30	18:46 end	Dusk
349	2011	0712	Yes	3	72	234.5	-162.5	1	24	1	0	0	0	0	0	0	0	1	1	Winter	2011-07-29	July	19:00		Night
350	2011	0714	Yes	4	96	234.5	-138.5	2	48	1	0	0	0	1	0	0	0	0	2	Winter	2011-07-29	July	19:30		Night
351	2011	0716	Yes	8	192	234.5	-42.5	3	72	0	0	2	0	2	0	1	0	0	6	Winter	2011-07-29	July	20:00		Night
352	2011	0718	Yes	5	120	234.5	-114.5	0	0	0	0	2	0	0	0	0	0	3	0	Winter	2011-07-29	July	20:30		Night
353	2011	0720	No	0	0	234.5	-234.5	0	0	0	0	0	0	0	0	0	0	0	0	Winter	2011-07-29	July	21:00		Night
354	2011	0722	Yes	4	96	234.5	-138.5	2	48	0	0	0	0	2	0	0	0	0	2	Winter	2011-07-29	July	21:30		Night
355	2011	0724	No	0	0	234.5	-234.5	0	0	0	0	0	0	0	0	0	0	0	0	Winter	2011-07-29	July	22:00		Night
356	2011	0726	Yes	3	72	234.5	-162.5	0	0	0	0	3	0	0	0	0	0	0	0	Winter	2011-07-29	July	22:30		Night
357	2011	0728	No	0	0	234.5	-234.5	0	0	0	0	0	0	0	0	0	0	0	0	Winter	2011-07-29	July	23:00		Night
358	2011	0730	Yes	5	120	234.5	-114.5	3	72	0	0	2	0	0	0	0	0	0	5	Winter	2011-07-29	July	23:30		Night
359	2011	0732	Yes	5	120	128	-8	4	96	0	1	0	0	0	0	0	0	0	5	Winter	2011-07-30	July	00:00		Night
360	2011	0734	Yes	8	192	128	64	1	24	0	0	0	0	7	0	0	0	0	2	Winter	2011-07-30	July	00:30		Night
361	2011	0736	Yes	2	48	128	-80	0	0	0	0	0	0	2	0	0	0	0	0	Winter	2011-07-30	July	01:00		Night
362	2011	0738	Yes	7	168	128	40	1	24	0	0	0	0	2	0	0	0	3	0	Winter	2011-07-30	July	01:30		Night
363	2011	0740	Yes	6	144	128	16	6	144	0	0	0	0	0	0	0	0	0	4	Winter	2011-07-30	July	02:00		Night
364	2011	0742	Yes	6	144	128	16	0	0	0	3	0	0	3	0	0	0	0	1	Winter	2011-07-30	July	02:30		Night
365	2011	0744	Yes	2	48	128	-80	1	24	0	0	0	0	1	0	0	0	0	1	Winter	2011-07-30	July	03:00		Night
366	2011	0746	No	0	0	128	-128	0	0	0	0	0	0	0	0	0	0	0	0	Winter	2011-07-30	July	03:30		Night
367	2011	0748	Yes	5	120	128	-8	2	48	0	0	0	0	1	0	0	0	2	0	Winter	2011-07-30	July	04:00		Night
368	2011	0750	Yes	6	144	128	16	2	48	0	0	0	0	3	0	0	0	1	4	Winter	2011-07-30	July	04:30		Night
369	2011	0752	Yes	11	264	128	136	3	72	0	0	4	0	0	0	0	0	4	3	Winter	2011-07-30	July	05:00		Night
370	2011	0754	Yes	8	192	128	64	2	48	0	1	3	0	1	0	0	0	1	1	Winter	2011-07-30	July	05:30		Night
371	2011	0756	No	0	0	128	-128	0	0	0	0	0	0	0	0	0	0	0	0	Winter	2011-07-30	July	06:00		Night
372	2011	0758	Yes	6	144	128	16	2	48	0	0	1	0	2	0	0	0	1	2	Winter	2011-07-30	July	06:30		Night
373	2011	0760	Yes	3	72	128	-56	0	0	0	0	0	0	1	0	0	0	2	0	Winter	2011-07-30	July	07:00		Night
374	2011	0762	Yes	9	216	128	88	4	96	0	1	0	0	1	0	0	0	3	3	Winter	2011-07-30	July	07:30	7:16 begin	Dawn
375	2011	0764	Yes	16	384	128	256	5	120	0	1	0	0	2	0	4	0	4	7	Winter	2011-07-30	July	08:00		Dawn
376	2011	0766	Yes	15	360	128	232	7	168	0	0	2	0	0	0	1	0	5	6	Winter	2011-07-30	July	08:30	8:32 rise	Dawn
377	2011	0768	Yes	16	384	128	256	12	288	0	0	0	0	2	0	0	0	2	9	Winter	2011-07-30	July	09:00		Morning
378	2011	0770	Yes	4	96	128	-32	2	48	0	0	2	0	0	0	0	0	0	0	Winter	2011-07-30	July	09:30		Morning
379	2011	0772	Yes	6	144	128	16	2	48	0	0	3	0	1	0	0	0	0	1	Winter	2011-07-30	July	10:00		Morning
380	2011	0774	Yes	7	168	128	40	7	168	0	0	0	0	0	0	0	0	0	5	Winter	2011-07-30	July	10:30		Morning
381	2011	0776	Yes	7	168	128	40	5	120	0	0	2	0	0	0	0	0	0	1	Winter	2011-07-30	July	11:00		Morning
382	2011	0778	Yes	15	360	128	232	15	360	0	0	0	0	0	0	0	0	0	14	Winter	2011-07-30	July	11:30		Morning
383	2011	0780	Yes	3	72	128	-56	0	0	0	0	0	0	0	0	0	0	0	4	Winter	2011-07-30	July	12:00		Morning
384	2011	0782	Yes	12	288	128	160	10	240	0	0	2	0	0	0	0	0	0	5	Winter	2011-07-30	July	12:30		Morning
385	2011	0784	Yes	4	96	128	-32	4	96	0	0	0	0	0	0	0	0	0	4	Winter	2011-07-30	July	13:00	13:01 transit	Afternoon
386	2011	0786	Yes	10	240	128	112	10	240	0	0	0	0	0	0	0	0	0	4	Winter	2011-07-30	July	13:30		Afternoon
387	2011	0788	Yes	1	24	128	-104	1	24	0	0	0	0	0	0	0	0	0	1	Winter	2011-07-30	July	14:00		Afternoon
388	2011	0790	Yes	5	120	128	-8	0	0	0	0	0	0	5	0	0	0	0	0	Winter	2011-07-30	July	14:30		Afternoon
389	2011	0792	Yes	3	72	128	-56	3	72	0	0	0	0	0	0	0	0	0	1	Winter	2011-07-30	July	15:00		Afternoon
390	2011	0794	Yes	4	96	128	-32	0	0	0	0	1	0	0	3	0	0	0	0	Winter	2011-07-30	July	15:30		Afternoon
391	2011	0796	No	0	0	128	-128	0	0	0	0	0	0	0	0	0	0	0	1	Winter	2011-07-30	July	16:00		Afternoon
392	2011	0798	No	0	0	128	-128	0	0	0	0	0	0	0	0	0	0	0	0	Winter	2011-07-30	July	16:30		Afternoon
393	2011	0800	Yes	4	96	128	-32	1	24	0	0	3	0	0	0	0	0	0	1	Winter	2011-07-30	July	17:00		Afternoon
394	2011	0802	Yes	1	24	128	-104	1	24	0	0	0	0	0	0	0	0	0	1	Winter	2011-07-30	July	17:30	17:31 set	Dusk
395	2011	0804	No	0	0	128	-128	0	0	0	0	0	0	0	0	0	0	0	0	Winter	2011-07-30	July	18:00		Dusk
396	2011	0806	Yes	7	168	128	40	3	72	1	0	0	0	4	0	0	0	0	4	Winter	2011-07-30	July	18:30	18:47 end	Dusk
397	2011	0808	Yes	3	72	128	-56	2	48	0	0	1	0	0	0	0	0	0	3	Winter	2011-07-30	July	19:00		Night
398	2011	0810	Yes	1	24	128	-104	0	0	0	0	1	0	0	0	0	0	0	0	Winter	2011-07-30	July	19:30		Night
399	2011	0812	Yes	4	96	128	-32	4	96	0	0	0	0	0	0	0	0	0	2	Winter	2011-07-30	July	20:00		Night
400	2011	0814	Yes	5	120	128	-8	5	120	0	0	0	0	0	0	0	0	0	7	Winter	2011-07-30	July	20:30		Night
401	2011	0816	No	0	0	128	-128	0	0	0	0	0	0	0	0	0	0	0	0	Winter	2011-07-30	July	21:00		Night
402	2011	0818	Yes	6	144	128	16	3	72	0	2	0	0	1	0	0	0	0	4	Winter	2011-07-30	July	21:30		Night
403	2011	0820	Yes	4	96	128	-32	3	72	1	0	0	0	0	0	0	0	0	3	Winter	2011-07-30	July	22:00		Night
404	2011	0822	Yes	6	144	128	16	3	72	1	0	0	0	2	0	0	0	0	4	Winter	2011-07-30	July	22:30		Night
405	2011	0824	Yes	2	48	128	-80	2	48	0	0	0	0	0	0	0	0	0	2	Winter	2011-07-30	July	23:00		Night
406	2011	0826	Yes	1	24	128	-104	0	0	0	0	0	0	1	0	0	0	0	0	Winter	2011-07-30	July	23:30		Night
407	2011	0828	Yes	1	24	72.5	-48.5	1	24	0	0	0	0	0	0	0	0	0	4	Winter	2011-07-31	July	00:00		Night
408	2011	0830	Yes	2	48	72.5	-24.5	1	24	0	0	1	0	0	0	0	0	0	1	Winter	2011-07-31	July	00:30		Night
409	2011	0832	No	0	0	72.5	-72.5	0	0	0	0	0	0	0	0	0	0	0	0	Winter	2011-07-31	July	01:00		Night
410	2011	0834	No	0	0	72.5	-72.5	0	0	0	0	0	0	0	0	0	0	0	0	Winter	2011-07-31	July	01:30		Night
411	2011	0836	No	0	0	72.5	-72.5	0	0	0	0	0	0	0	0	0	0	0	0	Winter	2011-07-31	July	02:00		Night
412	2011	0838	No	0	0	72.5	-72.5	0	0	0	0	0	0	0	0	0	0	0	0	Winter	2011-07-31	July	02:30		Night
413	2011	0840	No	0	0	72.5	-72.5	0	0	0	0	0	0	0	0	0	0	0	0	Winter	2011-07-31	July	03:00		Night
414	2011	0842	Yes	3	72	72.5	-0.5	1	24	2	0	0	0	0	0	0	0	0	3	Winter	2011-07-31	July	03:30		Night
415	2011	0844	Yes	10	240	72.5	167.5	8	192	0	0	2	0	0	0	0	0	0	9	Winter	2011-07-31	July	04:00		Night
416	2011	0846	No	0	0	72.5	-72.5	0	0	0	0	0	0	0	0	0	0	0	0	Winter	2011-07-31	July	04:30		Night
417	2011	0848	No	0	0	72.5	-72.5	0	0	0	0	0	0	0	0	0	0	0	0	Winter	2011-07-31	July	05:00		Night
418	2011	0850	Yes	1	24	72.5	-48.5	1	24	0	0	0	0	0	0	0	0	0	2	Winter	2011-07-31	July	05:30		Night
419	2011	0852	Yes	1	24	72.5	-48.5	1	24	0	0	0	0	0	0	0	0	0	5	Winter	2011-07-31	July	06:00		Night
420	2011	0854	Yes	7	168	72.5	95.5	7	168	0	0	0	0	0	0	0	0	0	6	Winter	2011-07-31	July	06:30		Night
421	2011	0856	Yes	3	72	72.5	-0.5	3	72	0	0	0	0	0	0	0	0	0	4	Winter	2011-07-31	July	07:00		Night
422	2011	0858	No	0	0	72.5	-72.5	0	0	0	0	0	0	0	0	0	0	0	2	Winter	2011-07-31	July	07:30	7:15 begin	Dawn
423	2011	0860	Yes	2	48	72.5	-24.5	2	48	0	0	0	0	0	0	0	0	0	2	Winter	2011-07-31	July	08:00		Dawn
424	2011	0862	No	0	0	72.5	-72.5	0	0	0	0	0	0	0	0	0	0	0	0	Winter	2011-07-31	July	08:30	8:31 rise	Dawn
425	2011	0864	Yes	1	24	72.5	-48.5	0	0	0	0	0	0	1	0	0	0	0	0	Winter	2011-07-31	July	09:00		Morning
426	2011	0866	No	0	0	72.5	-72.5	0	0	0	0	0	0	0	0	0	0	0	0	Winter	2011-07-31	July	09:30		Morning
427	2011	0868	No	0	0	72.5	-72.5	0	0	0	0	0	0	0	0	0	0	0	2	Winter	2011-07-31	July	10:00		Morning
428	2011	0870	No	0	0	72.5	-72.5	0	0	0	0	0	0	0	0	0	0	0	3	Winter	2011-07-31	July	10:30		Morning
429	2011	0872	No	8	192	72.5	119.5	6	144	0	0	2	0	0	0	0	0	0	11	Winter	2011-07-31	July	11:00		Morning
430	2011	0874	No	0	0	72.5	-72.5	0	0	0	0	0	0	0	0	0	0	0	0	Winter	2011-07-31	July	11:30		Morning
431	2011	0876	Yes	1	24	72.5	-48.5	0	0	0	0	0	0	1	0	0	0	0	0	Winter	2011-07-31	July	12:00		Morning
432	2011	0878	Yes	1	24	72.5	-48.5	0	0	0	0	0	0	1	0	0	0	0	1	Winter	2011-07-31	July	12:30		Morning
433	2011	0880	Yes	3	72	72.5	-0.5	0	0	0	0	3	0	0	0	0	0	0	4	Winter	2011-07-31	July	13:00	13:01 transit	Afternoon
434	2011	0882	No	0	0	72.5	-72.5	0	0	0	0	0	0	0	0	0	0	0	0	Winter	2011-07-31	July	13:30		Afternoon
435	2011	0884	Yes	3	72	72.5	-0.5	2	48	1	0	0	0	0	0	0	0	0	2	Winter	2011-07-31	July	14:00		Afternoon
436	2011	0886	No	0	0	72.5	-72.5	0	0	0	0	0	0	0	0	0	0	0	0	Winter	2011-07-31	July	14:30		Afternoon
437	2011	0888	No	0	0	72.5	-72.5	0	0	0	0	0	0	0	0	0	0	0	1	Winter	2011-07-31	July	15:00		Afternoon
438	2011	0890	Yes	4	96	72.5	23.5	0	0	0	0	3	0	1	0	0	0	0	4	Winter	2011-07-31	July	15:30		Afternoon
439	2011	0892	Yes	1	24	72.5	-48.5	0	0	0	0	0	0	1	0	0	0	0	3	Winter	2011-07-31	July	16:00		Afternoon
440	2011	0894	Yes	1	24	72.5	-48.5	0	0	0	0	0	0	1	0	0	0	0	0	Winter	2011-07-31	July	16:30		Afternoon
441	2011	0896	Yes	2	48	72.5	-24.5	2	48	0	0	0	0	0	0	0	0	0	2	Winter	2011-07-31	July	17:00		Afternoon
442	2011	0898	Yes	1	24	72.5	-48.5	0	0	0	0	0	0	1	0	0	0	0	0	Winter	2011-07-31	July	17:30	17:32 set	Dusk
443	2011	0900	Yes	4	96	72.5	23.5	4	96	0	0	0	0	0	0	0	0	0	4	Winter	2011-07-31	July	18:00		Dusk
444	2011	0902	Yes	7	168	72.5	95.5	5	120	0	0	0	0	2	0	0	0	0	6	Winter	2011-07-31	July	18:30	18:48 end	Dusk
445	2011	0904	Yes	3	72	72.5	-0.5	2	48	1	0	0	0	0	0	0	0	0	4	Winter	2011-07-31	July	19:00		Night
446	2011	0906	Yes	1	24	72.5	-48.5	1	24	0	0	0	0	0	0	0	0	0	2	Winter	2011-07-31	July	19:30		Night
447	2011	0908	Yes	19	456	72.5	383.5	3	72	0	0	1	0	4	7	4	0	0	9	Winter	2011-07-31	July	20:00		Night
448	2011	0910	Yes	12	288	72.5	215.5	9	216	0	0	3	0	0	0	0	0	0	10	Winter	2011-07-31	July	20:30		Night
449	2011	0912	Yes	4	96	72.5	23.5	3	72	0	0	0	0	1	0	0	0	0	2	Winter	2011-07-31	July	21:00		Night
450	2011	0914	Yes	5	120	72.5	47.5	2	48	0	2	0	0	1	0	0	0	0	6	Winter	2011-07-31	July	21:30		Night
451	2011	0916	Yes	2	48	72.5	-24.5	2	48	0	0	0	0	0	0	0	0	0	1	Winter	2011-07-31	July	22:00		Night
452	2011	0918	Yes	17	408	72.5	335.5	6	144	0	7	0	0	1	3	0	0	0	5	Winter	2011-07-31	July	22:30		Night
453	2011	0920	Yes	2	48	72.5	-24.5	0	0	0	0	0	0	2	0	0	0	0	0	Winter	2011-07-31	July	23:00		Night
454	2011	0922	Yes	13	312	72.5	239.5	10	240	0	0	3	0	0	0	0	0	0	18	Winter	2011-07-31	July	23:30		Night
455	2011	0924	Yes	17	408	169.043	238.957	7	168	8	0	0	0	2	0	0	0	0	12	Winter	2011-08-01	August	00:00		Night
456	2011	0926	Yes	2	48	169.043	-121.043	0	0	0	0	0	0	0	0	1	0	1	2	Winter	2011-08-01	August	00:30		Night
457	2011	0928	Yes	9	216	169.043	46.9565	8	192	1	0	0	0	0	0	0	0	0	11	Winter	2011-08-01	August	01:00		Night
458	2011	0930	Yes	12	288	169.043	118.957	12	288	0	0	0	0	0	0	0	0	0	13	Winter	2011-08-01	August	01:30		Night
459	2011	0932	Yes	2	48	169.043	-121.043	0	0	0	0	0	0	2	0	0	0	0	1	Winter	2011-08-01	August	02:00		Night
460	2011	0934	Yes	4	96	169.043	-73.0435	0	0	0	0	0	0	2	2	0	0	0	0	Winter	2011-08-01	August	02:30		Night
461	2011	0936	Yes	20	480	169.043	310.957	2	48	0	17	0	0	1	0	0	0	0	0	Winter	2011-08-01	August	03:00		Night
462	2011	0938	Yes	1	24	169.043	-145.043	0	0	0	0	0	0	1	0	0	0	0	0	Winter	2011-08-01	August	03:30		Night
463	2011	0940	Yes	11	264	169.043	94.9565	9	216	0	0	2	0	0	0	0	0	0	10	Winter	2011-08-01	August	04:00		Night
464	2011	0942	Yes	5	120	169.043	-49.0435	3	72	0	0	1	0	1	0	0	0	0	3	Winter	2011-08-01	August	04:30		Night
465	2011	0944	Yes	1	24	169.043	-145.043	1	24	0	0	0	0	0	0	0	0	0	2	Winter	2011-08-01	August	05:00		Night
466	2011	0946	Yes	5	120	169.043	-49.0435	3	72	0	0	0	0	2	0	0	0	0	6	Winter	2011-08-01	August	05:30		Night
467	2011	0948	Yes	8	192	169.043	22.9565	2	48	4	0	2	0	0	0	0	0	0	1	Winter	2011-08-01	August	06:00		Night
468	2011	0950	Yes	5	120	169.043	-49.0435	4	96	1	0	0	0	0	0	0	0	0	1	Winter	2011-08-01	August	06:30		Night
469	2011	0952	Yes	8	192	169.043	22.9565	5	120	0	0	0	0	3	0	0	0	0	8	Winter	2011-08-01	August	07:00		Night
470	2011	0954	Yes	15	360	169.043	190.957	2	48	0	3	0	0	5	0	5	0	0	2	Winter	2011-08-01	August	07:30	7:15 begin	Dawn
471	2011	0956	Yes	5	120	169.043	-49.0435	0	0	1	0	0	0	3	1	0	0	0	0	Winter	2011-08-01	August	08:00		Dawn
472	2011	0958	Yes	8	192	169.043	22.9565	2	48	0	0	0	0	6	0	0	0	0	0	Winter	2011-08-01	August	08:30	8:31 rise	Dawn
473	2011	0960	Yes	6	144	169.043	-25.0435	1	24	0	1	0	0	4	0	0	0	0	2	Winter	2011-08-01	August	09:00		Morning
474	2011	0962	Yes	10	240	169.043	70.9565	2	48	0	2	0	1	0	3	0	0	2	3	Winter	2011-08-01	August	09:30		Morning
475	2011	0964	Yes	1	24	169.043	-145.043	0	0	1	0	0	0	0	0	0	0	0	0	Winter	2011-08-01	August	10:00		Morning
476	2011	0966	Yes	5	120	169.043	-49.0435	4	96	1	0	0	0	0	0	0	0	0	3	Winter	2011-08-01	August	10:30		Morning
477	2011	0968	Yes	2	48	169.043	-121.043	1	24	0	0	0	0	1	0	0	0	0	1	Winter	2011-08-01	August	11:00		Morning
478	000	0004	Yes	4	64	512	-448	2	32	0	0	2	0	0	0	0	0	0	7	Winter	2011-08-06	August	14:30		Afternoon
479	000	0005	No	0	0	512	-512	0	0	0	0	0	0	0	0	0	0	0	1	Winter	2011-08-06	August	15:00		Afternoon
480	000	0006	Yes	27	432	512	-80	6	96	0	7	5	0	7	0	0	0	2	13	Winter	2011-08-06	August	15:30		Afternoon
481	000	0007	Yes	40	640	512	128	3	48	2	0	15	0	10	1	7	2	0	12	Winter	2011-08-06	August	16:00		Afternoon
482	000	0008	Yes	3	48	512	-464	3	48	0	0	0	0	0	0	0	0	0	13	Winter	2011-08-06	August	16:30		Afternoon
483	000	0009	Yes	15	240	512	-272	2	32	0	0	1	0	1	11	0	0	0	7	Winter	2011-08-06	August	17:00		Afternoon
484	000	0010	Yes	41	656	512	144	6	96	0	0	4	0	4	15	12	0	0	11	Winter	2011-08-06	August	17:30	17:41 set	Afternoon
485	000	0011	Yes	27	432	512	-80	19	304	0	0	3	0	4	1	0	0	0	30	Winter	2011-08-06	August	18:00		Dusk
486	000	0012	Yes	24	384	512	-128	8	128	5	1	2	0	2	5	0	0	1	16	Winter	2011-08-06	August	18:30		Dusk
487	000	0013	Yes	38	608	512	96	14	224	0	0	13	0	4	0	1	0	6	25	Winter	2011-08-06	August	19:00	18:55 end	Night
488	000	0014	Yes	49	784	512	272	7	112	0	0	14	0	14	3	4	0	7	11	Winter	2011-08-06	August	19:30		Night
489	000	0015	Yes	34	544	512	32	0	0	0	3	10	0	13	4	2	0	2	7	Winter	2011-08-06	August	20:00		Night
490	000	0016	Yes	44	704	512	192	5	80	0	0	14	0	16	1	0	0	8	9	Winter	2011-08-06	August	20:30		Night
491	000	0017	Yes	36	576	512	64	1	16	0	0	14	0	5	5	5	2	4	14	Winter	2011-08-06	August	21:00		Night
492	000	0018	Yes	53	848	512	336	7	112	2	5	21	0	6	1	2	2	7	9	Winter	2011-08-06	August	21:30		Night
493	000	0019	Yes	49	784	512	272	3	48	3	1	13	0	9	2	6	1	11	6	Winter	2011-08-06	August	22:00		Night
494	000	0020	Yes	46	736	512	224	9	144	2	3	17	0	8	0	0	0	7	17	Winter	2011-08-06	August	22:30		Night
495	000	0021	Yes	30	480	512	-32	5	80	2	3	4	0	1	7	2	0	6	12	Winter	2011-08-06	August	23:00		Night
496	000	0022	Yes	48	768	512	256	5	80	4	1	24	0	3	2	0	0	9	16	Winter	2011-08-06	August	23:30		Night
497	000	0023	Yes	82	1312	283.667	1028.33	22	352	2	10	18	0	25	0	1	0	4	25	Winter	2011-08-07	August	0:00		Night
498	000	0024	Yes	33	528	283.667	244.333	4	64	1	5	9	0	4	0	2	0	8	10	Winter	2011-08-07	August	0:30		Night
499	000	0025	Yes	25	400	283.667	116.333	12	192	1	0	1	0	2	0	6	0	3	17	Winter	2011-08-07	August	1:00		Night
500	000	0026	Yes	44	704	283.667	420.333	22	352	0	0	11	0	7	1	0	0	3	24	Winter	2011-08-07	August	1:30		Night
501	000	0027	Yes	18	288	283.667	4.33333	9	144	3	0	3	0	2	0	0	0	1	12	Winter	2011-08-07	August	2:00		Night
502	000	0028	Yes	31	496	283.667	212.333	7	112	0	1	2	0	14	0	4	1	2	6	Winter	2011-08-07	August	2:30		Night
503	000	0029	Yes	65	1040	283.667	756.333	8	128	2	10	10	0	6	4	12	1	12	10	Winter	2011-08-07	August	3:00		Night
504	000	0030	Yes	64	1024	283.667	740.333	28	448	2	0	12	0	12	0	3	3	4	31	Winter	2011-08-07	August	3:30		Night
505	000	0031	Yes	43	688	283.667	404.333	13	208	0	0	12	0	8	0	4	0	6	24	Winter	2011-08-07	August	4:00		Night
506	000	0032	Yes	17	272	283.667	-11.6667	13	208	2	0	0	0	0	0	0	0	2	9	Winter	2011-08-07	August	4:30		Night
507	000	0033	Yes	29	464	283.667	180.333	28	448	0	0	0	0	1	0	0	0	0	21	Winter	2011-08-07	August	5:00		Night
508	000	0034	Yes	9	144	283.667	-139.667	4	64	2	0	0	0	2	0	0	0	1	10	Winter	2011-08-07	August	5:30		Night
509	000	0035	Yes	25	400	283.667	116.333	10	160	0	4	0	0	8	2	0	0	1	11	Winter	2011-08-07	August	6:00		Night
510	000	0036	Yes	20	320	283.667	36.3333	10	160	0	0	5	0	5	0	0	0	0	20	Winter	2011-08-07	August	6:30		Night
511	000	0037	Yes	31	496	283.667	212.333	21	336	0	6	1	0	3	0	0	0	0	15	Winter	2011-08-07	August	7:00	7:07 begin	Night
512	000	0038	Yes	29	464	283.667	180.333	11	176	0	1	5	0	10	0	0	0	2	12	Winter	2011-08-07	August	7:30		Dawn
513	000	0039	Yes	7	112	283.667	-171.667	3	48	0	0	2	0	2	0	0	0	0	7	Winter	2011-08-07	August	8:00		Dawn
514	000	0040	Yes	2	32	283.667	-251.667	0	0	0	0	1	0	1	0	0	0	0	1	Winter	2011-08-07	August	8:30	8:20 rise	Morning
515	000	0041	Yes	13	208	283.667	-75.6667	6	96	2	0	2	0	3	0	0	0	0	10	Winter	2011-08-07	August	9:00		Morning
516	000	0042	Yes	37	592	283.667	308.333	16	256	0	2	10	0	7	1	0	0	1	19	Winter	2011-08-07	August	9:30		Morning
517	000	0043	Yes	11	176	283.667	-107.667	3	48	0	0	4	0	2	0	2	0	0	6	Winter	2011-08-07	August	10:00		Morning
518	000	0044	Yes	3	48	283.667	-235.667	1	16	0	1	0	0	0	0	0	0	1	3	Winter	2011-08-07	August	10:30		Morning
519	000	0045	Yes	10	160	283.667	-123.667	1	16	0	9	0	0	0	0	0	0	0	0	Winter	2011-08-07	August	11:00		Morning
520	000	0046	Yes	2	32	283.667	-251.667	0	0	0	1	1	0	0	0	0	0	0	2	Winter	2011-08-07	August	11:30		Morning
521	000	0047	Yes	2	32	283.667	-251.667	2	32	0	0	0	0	0	0	0	0	0	3	Winter	2011-08-07	August	12:00		Morning
522	000	0048	Yes	2	32	283.667	-251.667	1	16	0	0	0	0	0	0	0	0	1	1	Winter	2011-08-07	August	12:30		Morning
523	000	0049	Yes	12	192	283.667	-91.6667	0	0	0	0	6	0	0	4	0	0	2	8	Winter	2011-08-07	August	13:00	13:01 transit	Afternoon
524	000	0050	Yes	4	64	283.667	-219.667	1	16	0	1	1	0	0	1	0	0	0	2	Winter	2011-08-07	August	13:30		Afternoon
525	000	0051	Yes	15	240	283.667	-43.6667	4	64	2	6	2	0	0	0	0	0	1	7	Winter	2011-08-07	August	14:00		Afternoon
526	000	0052	Yes	4	64	283.667	-219.667	1	16	0	1	0	0	2	0	0	0	0	3	Winter	2011-08-07	August	14:30		Afternoon
527	000	0053	Yes	4	64	283.667	-219.667	2	32	1	1	0	0	0	0	0	0	0	1	Winter	2011-08-07	August	15:00		Afternoon
528	000	0054	Yes	1	16	283.667	-267.667	0	0	0	0	0	0	1	0	0	0	0	1	Winter	2011-08-07	August	15:30		Afternoon
529	000	0055	Yes	3	48	283.667	-235.667	2	32	0	0	0	0	0	0	0	1	0	4	Winter	2011-08-07	August	16:00		Afternoon
530	000	0056	Yes	16	256	283.667	-27.6667	4	64	1	2	7	0	0	0	2	0	0	15	Winter	2011-08-07	August	16:30		Afternoon
531	000	0057	Yes	21	336	283.667	52.3333	2	32	0	3	5	0	6	0	3	1	1	9	Winter	2011-08-07	August	17:00		Afternoon
532	000	0058	Yes	4	64	283.667	-219.667	1	16	0	0	0	0	0	0	2	0	1	3	Winter	2011-08-07	August	17:30	17:42 set	Afternoon
533	000	0059	Yes	10	160	283.667	-123.667	5	80	1	0	4	0	0	0	0	0	0	8	Winter	2011-08-07	August	18:00		Dusk
534	000	0060	Yes	34	544	283.667	260.333	17	272	0	3	14	0	0	0	0	0	0	21	Winter	2011-08-07	August	18:30		Dusk
535	000	0061	Yes	6	96	283.667	-187.667	0	0	0	5	0	0	1	0	0	0	0	1	Winter	2011-08-07	August	19:00	18:57 end	Night
536	000	0062	Yes	2	32	283.667	-251.667	1	16	0	0	0	0	1	0	0	0	0	4	Winter	2011-08-07	August	19:30		Night
537	000	0063	Yes	3	48	283.667	-235.667	1	16	0	2	0	0	0	0	0	0	0	1	Winter	2011-08-07	August	20:00		Night
538	000	0064	Yes	9	144	283.667	-139.667	2	32	2	0	3	0	0	0	0	2	0	3	Winter	2011-08-07	August	20:30		Night
539	000	0065	Yes	12	192	283.667	-91.6667	8	128	0	0	0	0	0	0	0	4	0	20	Winter	2011-08-07	August	21:00		Night
540	000	0066	Yes	9	144	283.667	-139.667	3	48	0	0	5	0	0	0	1	0	0	7	Winter	2011-08-07	August	21:30		Night
541	000	0067	Yes	11	176	283.667	-107.667	10	160	0	0	1	0	0	0	0	0	0	12	Winter	2011-08-07	August	22:00		Night
542	000	0068	Yes	5	80	283.667	-203.667	5	80	0	0	0	0	0	0	0	0	0	10	Winter	2011-08-07	August	22:30		Night
543	000	0069	Yes	9	144	283.667	-139.667	8	128	0	0	1	0	0	0	0	0	0	8	Winter	2011-08-07	August	23:00		Night
544	000	0070	Yes	3	48	283.667	-235.667	2	32	0	0	0	0	1	0	0	0	0	3	Winter	2011-08-07	August	23:30		Night
545	000	0071	No	0	0	143	-143	0	0	0	0	0	0	0	0	0	0	0	0	Winter	2011-08-08	August	0:00		Night
546	000	0072	No	13	208	143	65	11	176	0	0	1	0	1	0	0	0	0	13	Winter	2011-08-08	August	0:30		Night
547	000	0073	Yes	1	16	143	-127	0	0	0	1	0	0	0	0	0	0	0	0	Winter	2011-08-08	August	1:00		Night
548	000	0074	Yes	13	208	143	65	11	176	0	0	2	0	0	0	0	0	0	10	Winter	2011-08-08	August	1:30		Night
549	000	0075	Yes	14	224	143	81	1	16	0	6	7	0	0	0	0	0	0	6	Winter	2011-08-08	August	2:00		Night
550	000	0076	Yes	18	288	143	145	7	112	0	7	2	0	0	2	0	0	0	6	Winter	2011-08-08	August	2:30		Night
551	000	0077	Yes	7	112	143	-31	3	48	0	0	0	0	4	0	0	0	0	3	Winter	2011-08-08	August	3:00		Night
552	000	0078	Yes	12	192	143	49	1	16	1	0	4	0	2	1	3	0	0	4	Winter	2011-08-08	August	3:30		Night
553	000	0079	Yes	36	576	143	433	0	0	1	0	3	0	6	16	5	0	5	1	Winter	2011-08-08	August	4:00		Night
554	000	0080	Yes	5	80	143	-63	0	0	0	0	0	0	1	0	4	0	0	1	Winter	2011-08-08	August	4:30		Night
555	000	0081	Yes	6	96	143	-47	0	0	0	0	0	0	3	0	0	0	3	0	Winter	2011-08-08	August	5:00		Night
556	000	0082	Yes	5	80	143	-63	1	16	0	0	0	0	0	0	0	0	4	2	Winter	2011-08-08	August	5:30		Night
557	000	0083	Yes	5	80	143	-63	1	16	0	0	1	0	0	0	0	0	3	0	Winter	2011-08-08	August	6:00		Night
558	000	0084	Yes	11	176	143	33	1	16	0	0	6	0	0	0	4	0	0	5	Winter	2011-08-08	August	6:30		Night
559	000	0085	Yes	3	48	143	-95	2	32	0	0	0	0	1	0	0	0	0	3	Winter	2011-08-08	August	7:00	7:04 begin	Night
560	000	0086	Yes	13	208	143	65	2	32	0	0	7	0	2	0	1	1	0	4	Winter	2011-08-08	August	7:30		Dawn
561	000	0087	Yes	6	96	143	-47	0	0	0	0	0	0	0	0	0	0	6	0	Winter	2011-08-08	August	8:00		Dawn
562	000	0088	Yes	9	144	143	1	2	32	0	0	3	0	0	0	0	0	4	1	Winter	2011-08-08	August	8:30	8:18 rise	Morning
563	000	0089	Yes	14	224	143	81	0	0	1	0	4	0	1	4	4	0	0	1	Winter	2011-08-08	August	9:00		Morning
564	000	0090	Yes	9	144	143	1	4	64	0	5	0	0	0	0	0	0	0	3	Winter	2011-08-08	August	9:30		Morning
565	000	0091	Yes	6	96	143	-47	1	16	0	1	1	0	1	1	0	0	1	2	Winter	2011-08-08	August	10:00		Morning
566	000	0092	Yes	11	176	143	33	2	32	0	0	2	0	5	0	0	0	2	6	Winter	2011-08-08	August	10:30		Morning
567	000	0093	Yes	13	208	143	65	11	176	0	0	1	0	0	0	0	0	1	16	Winter	2011-08-08	August	11:00		Morning
568	000	0094	Yes	1	16	143	-127	1	16	0	0	0	0	0	0	0	0	0	4	Winter	2011-08-08	August	11:30		Morning
569	000	0095	Yes	6	96	143	-47	6	96	0	0	0	0	0	0	0	0	0	3	Winter	2011-08-08	August	12:00		Morning
570	000	0096	Yes	1	16	143	-127	0	0	0	0	1	0	0	0	0	0	0	7	Winter	2011-08-08	August	12:30		Morning
571	000	0097	Yes	13	208	143	65	13	208	0	0	7	0	0	4	0	2	0	5	Winter	2011-08-08	August	13:00	13:01 transit	Afternoon
572	000	0098	Yes	3	48	143	-95	3	48	0	0	0	0	0	0	0	0	0	5	Winter	2011-08-08	August	13:30		Afternoon
573	000	0099	Yes	1	16	143	-127	1	16	0	0	0	0	0	0	0	0	0	4	Winter	2011-08-08	August	14:00		Afternoon
574	000	0100	Yes	1	16	143	-127	0	0	0	0	0	0	0	0	1	0	0	0	Winter	2011-08-08	August	14:30		Afternoon
575	000	0101	Yes	8	128	143	-15	0	0	0	0	3	0	0	0	1	2	2	2	Winter	2011-08-08	August	15:00		Afternoon
576	000	0102	Yes	11	176	143	33	0	0	0	0	11	0	0	0	0	0	0	2	Winter	2011-08-08	August	15:30		Afternoon
577	000	0103	Yes	6	96	143	-47	1	16	0	3	0	0	0	2	0	0	0	1	Winter	2011-08-08	August	16:00		Afternoon
578	000	0104	Yes	14	224	143	81	0	0	5	0	3	0	2	2	2	0	0	0	Winter	2011-08-08	August	16:30		Afternoon
579	000	0105	Yes	27	432	143	289	8	128	3	0	4	0	8	3	1	0	0	12	Winter	2011-08-08	August	17:00		Afternoon
580	000	0106	Yes	13	208	143	65	0	0	0	1	0	0	4	6	2	0	0	1	Winter	2011-08-08	August	17:30	17:44 set	Afternoon
581	000	0107	Yes	5	80	143	-63	1	16	0	0	0	0	0	0	0	0	4	4	Winter	2011-08-08	August	18:00		Dusk
582	000	0108	Yes	7	112	143	-31	2	32	0	0	1	0	0	4	0	0	0	6	Winter	2011-08-08	August	18:30		Dusk
583	000	0109	Yes	18	288	143	145	3	48	1	0	1	0	2	7	1	3	0	9	Winter	2011-08-08	August	19:00	18:58 end	Night
584	000	0110	Yes	11	176	143	33	2	32	2	0	4	0	2	0	0	0	1	5	Winter	2011-08-08	August	19:30		Night
585	000	0111	Yes	15	240	143	97	0	0	1	1	4	0	1	1	6	0	1	1	Winter	2011-08-08	August	20:00		Night
586	000	0112	Yes	7	112	143	-31	2	32	0	1	0	0	4	0	0	0	0	5	Winter	2011-08-08	August	20:30		Night
587	000	0113	Yes	18	288	143	145	4	64	0	1	9	0	3	0	1	0	0	6	Winter	2011-08-08	August	21:00		Night
588	000	0114	Yes	9	144	143	1	2	32	0	5	0	0	2	0	0	0	0	6	Winter	2011-08-08	August	21:30		Night
589	000	0115	No	0	0	143	-143	0	0	0	0	0	0	0	0	0	0	0	0	Winter	2011-08-08	August	22:00		Night
590	000	0116	No	0	0	143	-143	0	0	0	0	0	0	0	0	0	0	0	0	Winter	2011-08-08	August	22:30		Night
591	000	0117	Yes	1	16	143	-127	0	0	0	0	1	0	0	0	0	0	0	0	Winter	2011-08-08	August	23:00		Night
592	000	0118	Yes	3	48	143	-95	1	16	1	0	0	0	0	1	0	0	0	1	Winter	2011-08-08	August	23:30		Night
593	000	0119	Yes	3	48	89.3333	-41.3333	0	0	0	0	2	0	0	0	1	0	0	1	Winter	2011-08-09	August	0:00		Night
594	000	0120	Yes	27	432	89.3333	342.667	3	48	0	0	1	0	0	10	2	0	11	13	Winter	2011-08-09	August	0:30		Night
595	000	0121	Yes	11	176	89.3333	86.6667	0	0	2	0	0	0	1	4	0	0	4	1	Winter	2011-08-09	August	1:00		Night
596	000	0122	Yes	5	80	89.3333	-9.33333	0	0	3	0	0	0	1	0	1	0	0	3	Winter	2011-08-09	August	1:30		Night
597	000	0123	Yes	16	256	89.3333	166.667	0	0	4	0	7	0	3	0	1	1	0	6	Winter	2011-08-09	August	2:00		Night
598	000	0124	Yes	16	256	89.3333	166.667	3	48	0	0	1	0	5	5	2	0	0	7	Winter	2011-08-09	August	2:30		Night
599	000	0125	Yes	7	112	89.3333	22.6667	0	0	0	0	0	0	3	0	2	2	0	0	Winter	2011-08-09	August	3:00		Night
600	000	0126	Yes	2	32	89.3333	-57.3333	0	0	0	0	1	0	1	0	0	0	0	0	Winter	2011-08-09	August	3:30		Night
601	000	0127	Yes	4	64	89.3333	-25.3333	0	0	0	0	0	0	3	0	0	1	0	1	Winter	2011-08-09	August	4:00		Night
602	000	0128	Yes	8	128	89.3333	38.6667	1	16	0	0	3	0	0	0	0	0	4	9	Winter	2011-08-09	August	4:30		Night
603	000	0129	Yes	8	128	89.3333	38.6667	1	16	0	0	6	0	0	0	0	0	1	4	Winter	2011-08-09	August	5:00		Night
604	000	0130	Yes	8	128	89.3333	38.6667	5	80	0	0	0	0	2	0	0	0	1	5	Winter	2011-08-09	August	5:30		Night
605	000	0131	Yes	7	112	89.3333	22.6667	5	80	0	0	1	0	1	0	0	0	0	8	Winter	2011-08-09	August	6:00		Night
606	000	0132	Yes	8	128	89.3333	38.6667	4	64	0	0	1	0	3	0	0	0	0	7	Winter	2011-08-09	August	6:30		Night
607	000	0133	Yes	3	48	89.3333	-41.3333	3	48	0	0	0	0	0	0	0	0	0	3	Winter	2011-08-09	August	7:00	7:03 begin	Night
608	000	0134	Yes	26	416	89.3333	326.667	0	0	1	0	0	0	2	13	3	0	7	2	Winter	2011-08-09	August	7:30		Dawn
609	000	0135	Yes	1	16	89.3333	-73.3333	1	16	0	0	0	0	0	0	0	0	0	1	Winter	2011-08-09	August	8:00		Dawn
610	000	0136	Yes	14	224	89.3333	134.667	0	0	1	3	2	0	5	1	0	0	2	1	Winter	2011-08-09	August	8:30	8:17 rise	Morning
611	000	0137	Yes	9	144	89.3333	54.6667	0	0	0	0	0	0	2	7	0	0	0	2	Winter	2011-08-09	August	9:00		Morning
612	000	0138	Yes	3	48	89.3333	-41.3333	0	0	0	0	0	0	0	0	0	0	3	2	Winter	2011-08-09	August	9:30		Morning
613	000	0139	No	0	0	89.3333	-89.3333	0	0	0	0	0	0	0	0	0	0	0	1	Winter	2011-08-09	August	10:00		Morning
614	000	0140	No	0	0	89.3333	-89.3333	0	0	0	0	0	0	0	0	0	0	0	0	Winter	2011-08-09	August	10:30		Morning
615	000	0141	Yes	1	16	89.3333	-73.3333	1	16	0	0	0	0	0	0	0	0	0	3	Winter	2011-08-09	August	11:00		Morning
616	000	0142	Yes	1	16	89.3333	-73.3333	1	16	0	0	0	0	0	0	0	0	0	2	Winter	2011-08-09	August	11:30		Morning
617	000	0143	No	0	0	89.3333	-89.3333	0	0	0	0	0	0	0	0	0	0	0	1	Winter	2011-08-09	August	12:00		Morning
618	000	0144	No	0	0	89.3333	-89.3333	0	0	0	0	0	0	0	0	0	0	0	1	Winter	2011-08-09	August	12:30		Morning
619	000	0145	Yes	5	80	89.3333	-9.33333	1	16	0	4	0	0	0	0	0	0	0	2	Winter	2011-08-09	August	13:00	13:01 transit	Afternoon
620	000	0146	Yes	5	80	89.3333	-9.33333	1	16	0	0	2	0	1	0	0	0	0	1	Winter	2011-08-09	August	13:30		Afternoon
621	000	0147	Yes	6	96	89.3333	6.66667	2	32	0	0	1	0	2	0	0	0	1	3	Winter	2011-08-09	August	14:00		Afternoon
622	000	0148	No	0	0	89.3333	-89.3333	0	0	0	0	0	0	0	0	0	0	0	1	Winter	2011-08-09	August	14:30		Afternoon
623	000	0149	No	0	0	89.3333	-89.3333	0	0	0	0	0	0	0	0	0	0	0	0	Winter	2011-08-09	August	15:00		Afternoon
624	000	0150	No	0	0	89.3333	-89.3333	0	0	0	0	0	0	0	0	0	0	0	1	Winter	2011-08-09	August	15:30		Afternoon
625	000	0151	Yes	5	80	89.3333	-9.33333	5	80	0	0	0	0	0	0	0	0	0	8	Winter	2011-08-09	August	16:00		Afternoon
626	000	0152	No	0	0	89.3333	-89.3333	0	0	0	0	0	0	0	0	0	0	0	1	Winter	2011-08-09	August	16:30		Afternoon
627	000	0153	Yes	2	32	89.3333	-57.3333	2	32	0	0	0	0	0	0	0	0	0	2	Winter	2011-08-09	August	17:00		Afternoon
628	000	0154	Yes	1	16	89.3333	-73.3333	1	16	0	0	0	0	0	0	0	0	0	2	Winter	2011-08-09	August	17:30	17:45 set	Afternoon
629	000	0155	Yes	7	112	89.3333	22.6667	7	112	0	0	0	0	0	0	0	0	0	14	Winter	2011-08-09	August	18:00		Dusk
630	000	0156	No	0	0	89.3333	-89.3333	0	0	0	0	0	0	0	0	0	0	0	1	Winter	2011-08-09	August	18:30		Dusk
631	000	0157	Yes	5	80	89.3333	-9.33333	4	64	0	0	1	0	0	0	0	0	0	9	Winter	2011-08-09	August	19:00	18:59 end	Night
632	000	0158	No	0	0	89.3333	-89.3333	0	0	0	0	0	0	0	0	0	0	0	0	Winter	2011-08-09	August	19:30		Night
633	000	0159	Yes	5	80	89.3333	-9.33333	5	80	0	0	0	0	0	0	0	0	0	8	Winter	2011-08-09	August	20:00		Night
634	000	0160	Yes	2	32	89.3333	-57.3333	2	32	0	0	0	0	0	0	0	0	0	6	Winter	2011-08-09	August	20:30		Night
635	000	0161	Yes	7	112	89.3333	22.6667	4	64	1	0	2	0	0	0	0	0	0	5	Winter	2011-08-09	August	21:00		Night
636	000	0162	No	0	0	89.3333	-89.3333	0	0	0	0	0	0	0	0	0	0	0	0	Winter	2011-08-09	August	21:30		Night
637	000	0163	Yes	3	48	89.3333	-41.3333	1	16	0	0	1	0	0	0	0	0	1	2	Winter	2011-08-09	August	22:00		Night
638	000	0164	Yes	6	96	89.3333	6.66667	4	64	1	0	1	0	0	0	0	0	0	2	Winter	2011-08-09	August	22:30		Night
639	000	0165	Yes	13	208	89.3333	118.667	6	96	0	0	6	0	0	0	1	0	0	11	Winter	2011-08-09	August	23:00		Night
640	000	0166	Yes	8	128	89.3333	38.6667	5	80	0	0	3	0	0	0	0	0	0	7	Winter	2011-08-09	August	23:30		Night
641	000	0167	Yes	2	32	64	-32	2	32	0	0	0	0	0	0	0	0	0	3	Winter	2011-08-10	August	0:00		Night
642	000	0168	Yes	2	32	64	-32	1	16	0	0	1	0	0	0	0	0	0	1	Winter	2011-08-10	August	0:30		Night
643	000	0169	Yes	6	96	64	32	3	48	0	0	2	0	1	0	0	0	0	3	Winter	2011-08-10	August	1:00		Night
644	000	0170	Yes	4	64	64	0	4	64	0	0	0	0	0	0	0	0	0	4	Winter	2011-08-10	August	1:30		Night
645	000	0171	Yes	14	224	64	160	12	192	0	0	1	0	1	0	0	0	0	15	Winter	2011-08-10	August	2:00		Night
646	000	0172	Yes	1	16	64	-48	0	0	0	0	0	0	1	0	0	0	0	0	Winter	2011-08-10	August	2:30		Night
647	000	0173	Yes	1	16	64	-48	1	16	0	0	0	0	0	0	0	0	0	2	Winter	2011-08-10	August	3:00		Night
648	000	0174	Yes	17	272	64	208	12	192	0	0	5	0	0	0	0	0	0	16	Winter	2011-08-10	August	3:30		Night
649	000	0175	Yes	6	96	64	32	0	0	0	0	1	0	3	0	2	0	0	0	Winter	2011-08-10	August	4:00		Night
650	000	0176	Yes	15	240	64	176	2	32	0	2	0	0	8	0	3	0	0	4	Winter	2011-08-10	August	4:30		Night
651	000	0177	Yes	17	272	64	208	12	192	0	0	5	0	0	0	0	0	0	19	Winter	2011-08-10	August	5:00		Night
652	000	0178	Yes	2	32	64	-32	0	0	0	0	2	0	0	0	0	0	0	1	Winter	2011-08-10	August	5:30		Night
653	000	0179	Yes	14	224	64	160	8	128	0	0	6	0	0	0	0	0	0	12	Winter	2011-08-10	August	6:00		Night
654	000	0180	Yes	5	80	64	16	0	0	0	0	5	0	0	0	0	0	0	2	Winter	2011-08-10	August	6:30		Night
655	000	0181	Yes	7	112	64	48	3	48	0	0	2	0	2	0	0	0	0	5	Winter	2011-08-10	August	7:00	7:01 begin	Dawn
656	000	0182	Yes	3	48	64	-16	2	32	0	0	0	0	1	0	0	0	0	6	Winter	2011-08-10	August	7:30		Dawn
657	000	0183	No	0	0	64	-64	0	0	0	0	0	0	0	0	0	0	0	0	Winter	2011-08-10	August	8:00		Dawn
658	000	0184	Yes	1	16	64	-48	0	0	1	0	0	0	0	0	0	0	0	2	Winter	2011-08-10	August	8:30	8:15 rise	Morning
659	000	0185	Yes	3	48	64	-16	2	32	0	0	0	0	1	0	0	0	0	6	Winter	2011-08-10	August	9:00		Morning
660	000	0186	Yes	3	48	64	-16	3	48	0	0	0	0	0	0	0	0	0	3	Winter	2011-08-10	August	9:30		Morning
661	000	0187	Yes	3	48	64	-16	0	0	1	0	2	0	0	0	0	0	0	1	Winter	2011-08-10	August	10:00		Morning
662	000	0188	Yes	5	80	64	16	5	80	0	0	0	0	0	0	0	0	0	6	Winter	2011-08-10	August	10:30		Morning
663	000	0189	Yes	7	112	64	48	2	32	2	0	0	0	0	0	3	0	0	4	Winter	2011-08-10	August	11:00		Morning
664	000	0190	Yes	2	32	64	-32	0	0	0	0	0	0	0	2	0	0	0	1	Winter	2011-08-10	August	11:30		Morning
665	000	0191	Yes	14	224	64	160	0	0	0	0	3	0	1	8	2	0	0	4	Winter	2011-08-10	August	12:00		Morning
666	000	0192	Yes	5	80	64	16	0	0	0	0	0	0	5	0	0	0	0	1	Winter	2011-08-10	August	12:30		Morning
667	000	0193	Yes	5	80	64	16	0	0	0	0	2	0	0	0	0	0	3	2	Winter	2011-08-10	August	13:00	13:00 transit	Afternoon
668	000	0194	No	0	0	64	-64	0	0	0	0	0	0	0	0	0	0	0	0	Winter	2011-08-10	August	13:30		Afternoon
669	000	0195	Yes	7	112	64	48	7	112	0	0	0	0	0	0	0	0	0	7	Winter	2011-08-10	August	14:00		Afternoon
670	000	0196	No	0	0	64	-64	0	0	0	0	0	0	0	0	0	0	0	2	Winter	2011-08-10	August	14:30		Afternoon
671	000	0197	Yes	7	112	64	48	1	16	0	0	3	0	0	0	0	0	3	3	Winter	2011-08-10	August	15:00		Afternoon
672	000	0198	Yes	15	240	64	176	7	112	2	0	4	0	0	0	0	0	2	10	Winter	2011-08-10	August	15:30		Afternoon
673	000	0199	Yes	9	144	64	80	4	64	0	0	2	0	0	0	0	0	3	6	Winter	2011-08-10	August	16:00		Afternoon
674	000	0200	Yes	13	208	64	144	11	176	0	0	2	0	0	0	0	0	0	16	Winter	2011-08-10	August	16:30		Afternoon
675	000	0201	Yes	4	64	64	0	1	16	0	0	3	0	0	0	0	0	0	1	Winter	2011-08-10	August	17:00		Afternoon
676	000	0202	Yes	3	48	64	-16	2	32	0	0	1	0	0	0	0	0	0	4	Winter	2011-08-10	August	17:30		Afternoon
677	000	0203	Yes	9	144	64	80	9	144	0	0	0	0	0	0	0	0	0	13	Winter	2011-08-10	August	18:00	17:47 set	Dusk
678	000	0204	Yes	6	96	64	32	6	96	0	0	0	0	0	0	0	0	0	8	Winter	2011-08-10	August	18:30		Dusk
679	000	0205	Yes	7	112	64	48	5	80	0	0	2	0	0	0	0	0	0	7	Winter	2011-08-10	August	19:00	19:00 end	Night
680	000	0206	No	0	0	64	-64	0	0	0	0	0	0	0	0	0	0	0	0	Winter	2011-08-10	August	19:30		Night
681	000	0207	No	0	0	64	-64	0	0	0	0	0	0	0	0	0	0	0	0	Winter	2011-08-10	August	20:00		Night
682	000	0208	Yes	20	320	64	256	0	0	1	0	9	0	5	0	0	0	5	7	Winter	2011-08-10	August	20:30		Night
683	000	0209	No	0	0	64	-64	0	0	0	0	0	0	0	0	0	0	0	4	Winter	2011-08-10	August	21:00		Night
684	000	0210	Yes	14	224	64	160	9	144	0	0	3	0	0	0	0	0	2	15	Winter	2011-08-10	August	21:30		Night
685	000	0211	Yes	25	400	64	336	2	32	0	12	5	0	1	0	0	0	5	8	Winter	2011-08-10	August	22:00		Night
686	000	0212	Yes	8	128	64	64	3	48	0	0	4	0	0	0	1	0	0	4	Winter	2011-08-10	August	22:30		Night
687	000	0213	Yes	1	16	64	-48	1	16	0	0	0	0	0	0	0	0	0	6	Winter	2011-08-10	August	23:00		Night
688	000	0214	Yes	1	16	64	-48	0	0	0	0	0	0	1	0	0	0	0	0	Winter	2011-08-10	August	23:30		Night
689	000	0215	No	0	0	361	-361	0	0	0	0	0	0	0	0	0	0	0	0	Winter	2011-08-11	August	0:00		Night
690	000	0216	No	0	0	361	-361	0	0	0	0	0	0	0	0	0	0	0	0	Winter	2011-08-11	August	0:30		Night
691	000	0217	Yes	9	144	361	-217	4	64	0	5	0	0	0	0	0	0	0	7	Winter	2011-08-11	August	1:00		Night
692	000	0218	Yes	1	16	361	-345	1	16	0	0	0	0	0	0	0	0	0	1	Winter	2011-08-11	August	1:30		Night
693	000	0219	No	0	0	361	-361	0	0	0	0	0	0	0	0	0	0	0	0	Winter	2011-08-11	August	2:00		Night
694	000	0220	No	0	0	361	-361	0	0	0	0	0	0	0	0	0	0	0	0	Winter	2011-08-11	August	2:30		Night
695	000	0221	Yes	2	32	361	-329	2	32	0	0	0	0	0	0	0	0	0	0	Winter	2011-08-11	August	3:00		Night
696	000	0222	No	0	0	361	-361	0	0	0	0	0	0	0	0	0	0	0	1	Winter	2011-08-11	August	3:30		Night
697	000	0223	Yes	22	352	361	-9	8	128	0	7	1	0	3	0	0	0	3	6	Winter	2011-08-11	August	4:00		Night
698	000	0224	Yes	17	272	361	-89	1	16	0	0	11	0	2	1	0	0	2	6	Winter	2011-08-11	August	4:30		Night
699	000	0225	Yes	22	352	361	-9	5	80	0	1	7	0	4	0	4	0	1	7	Winter	2011-08-11	August	5:00		Night
700	000	0226	Yes	12	192	361	-169	0	0	0	0	6	0	5	0	0	0	1	8	Winter	2011-08-11	August	5:30		Night
701	000	0227	Yes	20	320	361	-41	1	16	0	2	5	0	8	1	0	3	0	2	Winter	2011-08-11	August	6:00		Night
702	000	0228	Yes	51	816	361	455	2	32	0	1	8	0	23	4	7	0	6	6	Winter	2011-08-11	August	6:30		Night
703	000	0229	Yes	22	352	361	-9	3	48	1	0	1	0	5	1	9	1	1	8	Winter	2011-08-11	August	7:00	7:00 begin	Dawn
704	000	0230	Yes	41	656	361	295	13	208	1	0	11	0	12	0	3	0	1	17	Winter	2011-08-11	August	7:30		Dawn
705	000	0231	Yes	28	448	361	87	9	144	1	0	1	0	4	1	11	0	1	13	Winter	2011-08-11	August	8:00	8:13 rise	Dawn
706	000	0232	Yes	29	464	361	103	0	0	0	4	3	0	12	1	7	1	1	3	Winter	2011-08-11	August	8:30		Morning
707	000	0233	Yes	14	224	361	-137	0	0	0	0	0	0	4	3	3	0	4	1	Winter	2011-08-11	August	9:00		Morning
708	000	0234	Yes	24	384	361	23	1	16	0	0	0	0	12	0	5	1	5	4	Winter	2011-08-11	August	9:30		Morning
709	000	0235	Yes	16	256	361	-105	2	32	1	3	0	0	1	0	9	0	0	3	Winter	2011-08-11	August	10:00		Morning
710	000	0236	Yes	21	336	361	-25	0	0	0	0	1	0	9	0	6	0	5	7	Winter	2011-08-11	August	10:30		Morning
711	000	0237	Yes	47	752	361	391	28	448	0	5	6	0	6	0	1	0	2	39	Winter	2011-08-11	August	11:00		Morning
712	000	0238	Yes	25	400	361	39	0	0	0	0	5	0	9	5	0	0	6	13	Winter	2011-08-11	August	11:30		Morning
713	000	0239	Yes	12	192	361	-169	8	128	0	0	1	0	3	0	0	0	0	8	Winter	2011-08-11	August	12:00		Morning
714	000	0240	Yes	12	192	361	-169	0	0	0	6	1	0	0	0	0	2	3	2	Winter	2011-08-11	August	12:30		Morning
715	000	0241	Yes	11	176	361	-185	0	0	0	0	5	0	3	0	2	0	1	1	Winter	2011-08-11	August	13:00	13:00 transit	Afternoon
716	000	0242	Yes	19	304	361	-57	2	32	0	1	1	0	6	1	1	2	5	2	Winter	2011-08-11	August	13:30		Afternoon
717	000	0243	Yes	39	624	361	263	5	80	0	2	0	0	23	0	4	0	5	15	Winter	2011-08-11	August	14:00		Afternoon
718	000	0244	Yes	40	640	361	279	17	272	0	1	2	0	8	0	11	0	1	19	Winter	2011-08-11	August	14:30		Afternoon
719	000	0245	Yes	23	368	361	7	1	16	0	0	0	0	4	2	12	0	4	5	Winter	2011-08-11	August	15:00		Afternoon
720	000	0246	Yes	8	128	361	-233	0	0	0	1	0	0	2	0	5	0	0	2	Winter	2011-08-11	August	15:30		Afternoon
721	000	0247	Yes	18	288	361	-73	0	0	0	8	0	0	0	0	9	1	0	3	Winter	2011-08-11	August	16:00		Afternoon
722	000	0248	Yes	13	208	361	-153	2	32	0	0	3	0	2	0	3	0	3	4	Winter	2011-08-11	August	16:30		Afternoon
723	000	0249	Yes	18	288	361	-73	10	160	0	1	0	0	4	0	1	0	2	13	Winter	2011-08-11	August	17:00		Afternoon
724	000	0250	Yes	22	352	361	-9	5	80	1	1	4	0	3	0	8	0	0	13	Winter	2011-08-11	August	17:30		Afternoon
725	000	0251	Yes	29	464	361	103	1	16	0	1	5	0	13	5	0	0	4	5	Winter	2011-08-11	August	18:00	17:48 set	Dusk
726	000	0252	Yes	37	592	361	231	4	64	0	1	5	0	13	6	4	0	4	10	Winter	2011-08-11	August	18:30		Dusk
727	000	0253	Yes	12	192	361	-169	2	32	0	0	2	0	3	1	2	0	2	5	Winter	2011-08-11	August	19:00	19:00 end	Night
728	000	0254	Yes	44	704	361	343	10	160	0	2	12	0	3	6	0	0	11	26	Winter	2011-08-11	August	19:30		Night
729	000	0255	Yes	30	480	361	119	0	0	0	12	16	0	0	0	1	0	1	9	Winter	2011-08-11	August	20:00		Night
730	000	0256	Yes	49	784	361	423	8	128	2	1	13	0	9	2	4	0	10	20	Winter	2011-08-11	August	20:30		Night
731	000	0257	Yes	39	624	361	263	7	112	2	0	13	0	8	1	1	1	6	14	Winter	2011-08-11	August	21:00		Night
732	000	0258	Yes	38	608	361	247	1	16	0	5	14	0	12	0	1	0	5	17	Winter	2011-08-11	August	21:30		Night
733	000	0259	Yes	20	320	361	-41	7	112	1	0	4	0	3	0	5	0	0	12	Winter	2011-08-11	August	22:00		Night
734	000	0260	Yes	53	848	361	487	2	32	11	0	22	0	10	0	3	0	5	5	Winter	2011-08-11	August	22:30		Night
735	000	0261	Yes	37	592	361	231	3	48	0	7	6	0	9	7	3	0	2	12	Winter	2011-08-11	August	23:00		Night
736	000	0262	Yes	37	592	361	231	3	48	1	0	10	0	11	0	7	0	5	13	Winter	2011-08-11	August	23:30		Night
737	000	0263	Yes	84	1344	298	1046	17	272	3	8	18	0	14	2	9	1	5	25	Winter	2011-08-12	August	0:00		Night
738	000	0264	Yes	61	976	298	678	8	128	2	1	21	0	15	3	1	0	10	19	Winter	2011-08-12	August	0:30		Night
739	000	0265	Yes	48	768	298	470	7	112	0	6	7	0	8	7	6	1	6	9	Winter	2011-08-12	August	1:00		Night
740	000	0266	Yes	37	592	298	294	4	64	1	2	6	0	10	0	4	1	9	2	Winter	2011-08-12	August	1:30		Night
741	000	0267	Yes	30	480	298	182	0	0	1	2	5	0	9	0	1	0	12	3	Winter	2011-08-12	August	2:00		Night
742	000	0268	Yes	28	448	298	150	5	80	0	3	6	0	8	0	2	0	4	9	Winter	2011-08-12	August	2:30		Night
743	000	0269	Yes	29	464	298	166	10	160	2	2	5	0	3	0	3	2	2	14	Winter	2011-08-12	August	3:00		Night
744	000	0270	Yes	12	192	298	-106	2	32	1	3	0	0	3	0	1	0	2	9	Winter	2011-08-12	August	3:30		Night
745	000	0271	Yes	21	336	298	38	0	0	0	1	6	0	9	1	2	0	2	7	Winter	2011-08-12	August	4:00		Night
746	000	0272	Yes	4	64	298	-234	0	0	0	0	2	0	2	0	0	0	0	5	Winter	2011-08-12	August	4:30		Night
747	000	0273	Yes	7	112	298	-186	3	48	0	1	0	0	3	0	0	0	0	4	Winter	2011-08-12	August	5:00		Night
748	000	0274	Yes	2	32	298	-266	0	0	0	0	0	0	0	0	1	0	1	1	Winter	2011-08-12	August	5:30		Night
749	000	0275	Yes	5	80	298	-218	1	16	0	0	0	0	4	0	0	0	0	1	Winter	2011-08-12	August	6:00		Night
750	000	0276	Yes	28	448	298	150	1	16	0	4	2	0	12	1	0	5	3	9	Winter	2011-08-12	August	6:30		Night
751	000	0277	Yes	26	416	298	118	2	32	3	5	7	0	2	5	2	0	0	12	Winter	2011-08-12	August	7:00	6:58 begin	Dawn
752	000	0278	Yes	26	416	298	118	5	80	0	1	8	0	7	3	0	0	2	18	Winter	2011-08-12	August	7:30		Dawn
753	000	0279	Yes	36	576	298	278	3	48	3	15	5	0	5	0	3	0	2	9	Winter	2011-08-12	August	8:00	8:11 rise	Dawn
754	000	0280	Yes	5	80	298	-218	4	64	0	0	1	0	0	0	0	0	0	12	Winter	2011-08-12	August	8:30		Morning
755	000	0281	Yes	10	160	298	-138	0	0	0	0	8	0	1	0	0	0	1	4	Winter	2011-08-12	August	9:00		Morning
756	000	0282	Yes	1	16	298	-282	0	0	0	0	0	0	1	0	0	0	0	3	Winter	2011-08-12	August	9:30		Morning
757	000	0283	Yes	6	96	298	-202	1	16	0	0	0	0	5	0	0	0	0	2	Winter	2011-08-12	August	10:00		Morning
758	000	0284	Yes	13	208	298	-90	9	144	0	0	2	0	2	0	0	0	0	16	Winter	2011-08-12	August	10:30		Morning
759	000	0285	Yes	16	256	298	-42	0	0	3	0	7	0	5	0	0	0	1	6	Winter	2011-08-12	August	11:00		Morning
760	000	0286	Yes	3	48	298	-250	0	0	0	0	3	0	0	0	0	0	0	1	Winter	2011-08-12	August	11:30		Morning
761	000	0287	Yes	7	112	298	-186	0	0	3	0	2	0	0	0	2	0	0	1	Winter	2011-08-12	August	12:00	12:00 transit	Afternoon
762	000	0288	Yes	23	368	298	70	0	0	0	0	3	0	4	11	3	0	2	4	Winter	2011-08-12	August	12:30		Afternoon
763	000	0289	Yes	16	256	298	-42	0	0	0	1	3	0	1	11	0	0	0	3	Winter	2011-08-12	August	13:00		Afternoon
764	000	0290	Yes	17	272	298	-26	2	32	0	0	4	0	4	0	0	0	7	7	Winter	2011-08-12	August	13:30		Afternoon
765	000	0291	Yes	11	176	298	-122	1	16	0	0	0	0	7	0	0	0	3	3	Winter	2011-08-12	August	14:00		Afternoon
766	000	0292	Yes	25	400	298	102	0	0	0	2	1	0	3	1	14	0	4	2	Winter	2011-08-12	August	14:30		Afternoon
767	000	0293	Yes	17	272	298	-26	3	48	1	0	2	0	1	0	8	1	1	9	Winter	2011-08-12	August	15:00		Afternoon
768	000	0294	Yes	13	208	298	-90	2	32	0	3	1	0	2	0	0	0	5	5	Winter	2011-08-12	August	15:30		Afternoon
769	000	0295	Yes	12	192	298	-106	0	0	0	6	0	0	6	0	0	0	0	6	Winter	2011-08-12	August	16:00		Afternoon
770	000	0296	No	0	0	298	-298	0	0	0	0	0	0	0	0	0	0	0	1	Winter	2011-08-12	August	16:30		Afternoon
771	000	0297	Yes	11	176	298	-122	8	128	0	0	0	0	0	0	0	0	3	9	Winter	2011-08-12	August	17:00		Afternoon
772	000	0298	No	0	0	298	-298	0	0	0	0	0	0	0	0	0	0	0	1	Winter	2011-08-12	August	17:30		Afternoon
773	000	0299	Yes	17	272	298	-26	6	96	0	5	2	0	4	0	0	0	0	8	Winter	2011-08-12	August	18:00	17:50 set	Dusk
774	000	0300	Yes	15	240	298	-58	3	48	0	2	0	0	9	0	0	0	1	7	Winter	2011-08-12	August	18:30		Dusk
775	000	0301	Yes	20	320	298	22	3	48	2	1	2	0	11	0	0	1	0	11	Winter	2011-08-12	August	19:00	19:03 end	Dusk
776	000	0302	Yes	26	416	298	118	0	0	0	1	6	0	15	0	3	1	0	9	Winter	2011-08-12	August	19:30		Night
777	000	0303	Yes	12	192	298	-106	0	0	0	0	0	0	10	0	0	0	2	6	Winter	2011-08-12	August	20:00		Night
778	000	0304	Yes	10	160	298	-138	0	0	0	2	0	0	5	0	0	0	3	4	Winter	2011-08-12	August	20:30		Night
779	000	0305	Yes	12	192	298	-106	2	32	3	0	2	0	4	0	0	0	1	12	Winter	2011-08-12	August	21:00		Night
780	000	0306	Yes	19	304	298	6	15	240	0	0	1	0	0	0	0	3	0	15	Winter	2011-08-12	August	21:30		Night
781	000	0307	Yes	21	336	298	38	6	96	0	3	2	0	6	0	1	0	3	13	Winter	2011-08-12	August	22:00		Night
782	000	0308	Yes	13	208	298	-90	13	208	0	0	0	0	0	0	0	0	0	11	Winter	2011-08-12	August	22:30		Night
783	000	0309	Yes	18	288	298	-10	3	48	1	0	5	0	5	0	2	1	1	13	Winter	2011-08-12	August	23:00		Night
784	000	0310	Yes	21	336	298	38	0	0	3	2	5	0	5	0	2	0	4	3	Winter	2011-08-12	August	23:30		Night
785	000	0311	Yes	34	544	258.667	285.333	2	32	2	1	3	0	8	3	7	0	8	3	Winter	2011-08-13	August	0:00		Night
786	000	0312	Yes	12	192	258.667	-66.6667	3	48	0	0	0	0	3	5	1	0	0	9	Winter	2011-08-13	August	0:30		Night
787	000	0313	Yes	12	192	258.667	-66.6667	0	0	0	2	0	0	5	0	2	0	3	12	Winter	2011-08-13	August	1:00		Night
788	000	0314	Yes	5	80	258.667	-178.667	0	0	0	0	0	0	2	0	0	0	3	1	Winter	2011-08-13	August	1:30		Night
789	000	0315	Yes	30	480	258.667	221.333	6	96	0	0	2	0	6	10	4	0	2	6	Winter	2011-08-13	August	2:00		Night
790	000	0316	Yes	21	336	258.667	77.3333	5	80	1	7	1	0	4	2	0	1	0	6	Winter	2011-08-13	August	2:30		Night
791	000	0317	Yes	39	624	258.667	365.333	23	368	0	1	0	0	1	8	2	0	4	33	Winter	2011-08-13	August	3:00		Night
792	000	0318	Yes	48	768	258.667	509.333	24	384	0	1	3	0	4	2	2	2	10	34	Winter	2011-08-13	August	3:30		Night
793	000	0319	Yes	15	240	258.667	-18.6667	3	48	0	5	0	0	0	2	2	0	3	7	Winter	2011-08-13	August	4:00		Night
794	000	0320	Yes	17	272	258.667	13.3333	8	128	0	0	0	0	1	6	0	0	2	13	Winter	2011-08-13	August	4:30		Night
795	000	0321	Yes	18	288	258.667	29.3333	3	48	0	1	1	0	2	4	4	0	3	6	Winter	2011-08-13	August	5:00		Night
796	000	0322	Yes	18	288	258.667	29.3333	4	64	0	1	3	0	4	4	0	0	2	8	Winter	2011-08-13	August	5:30		Night
797	000	0323	Yes	35	560	258.667	301.333	13	208	8	0	5	0	3	3	0	0	3	21	Winter	2011-08-13	August	6:00		Night
798	000	0324	Yes	19	304	258.667	45.3333	4	64	6	0	0	0	5	2	0	1	1	7	Winter	2011-08-13	August	6:30		Night
799	000	0325	Yes	26	416	258.667	157.333	5	80	0	4	3	0	5	2	7	0	0	10	Winter	2011-08-13	August	7:00	6:56 begin	Dawn
800	000	0326	Yes	13	208	258.667	-50.6667	8	128	0	1	0	0	4	0	0	0	0	13	Winter	2011-08-13	August	7:30		Dawn
801	000	0327	Yes	4	64	258.667	-194.667	1	16	0	0	0	0	0	0	3	0	0	6	Winter	2011-08-13	August	8:00	8:10 rise	Dawn
802	000	0328	No	0	0	258.667	-258.667	0	0	0	0	0	0	0	0	0	0	0	1	Winter	2011-08-13	August	8:30		Morning
803	000	0329	Yes	19	304	258.667	45.3333	17	272	0	0	0	0	2	0	0	0	0	18	Winter	2011-08-13	August	9:00		Morning
804	000	0330	Yes	52	832	258.667	573.333	37	592	1	0	8	0	0	0	2	1	3	44	Winter	2011-08-13	August	9:30		Morning
805	000	0331	Yes	6	96	258.667	-162.667	5	80	0	0	0	0	0	0	1	0	0	7	Winter	2011-08-13	August	10:00		Morning
806	000	0332	Yes	8	128	258.667	-130.667	6	96	0	0	0	0	1	0	0	0	1	9	Winter	2011-08-13	August	10:30		Morning
807	000	0333	Yes	7	112	258.667	-146.667	4	64	0	0	0	0	2	0	0	0	1	8	Winter	2011-08-13	August	11:00		Morning
808	000	0334	Yes	21	336	258.667	77.3333	1	16	0	0	2	0	11	6	1	0	0	8	Winter	2011-08-13	August	11:30		Morning
809	000	0335	Yes	15	240	258.667	-18.6667	11	176	0	0	0	2	0	0	0	0	0	10	Winter	2011-08-13	August	12:00		Morning
810	000	0336	Yes	14	224	258.667	-34.6667	11	176	0	0	0	3	0	0	0	0	0	13	Winter	2011-08-13	August	12:30		Morning
811	000	0337	Yes	1	16	258.667	-242.667	1	16	0	0	0	0	0	0	0	0	0	2	Winter	2011-08-13	August	13:00	13:00 transit	Afternoon
812	000	0338	Yes	3	48	258.667	-210.667	0	0	1	0	0	0	2	0	0	0	0	1	Winter	2011-08-13	August	13:30		Afternoon
813	000	0339	Yes	13	208	258.667	-50.6667	13	208	0	0	0	0	0	0	0	0	0	18	Winter	2011-08-13	August	14:00		Afternoon
814	000	0340	Yes	7	112	258.667	-146.667	6	96	0	0	0	0	1	0	0	0	0	8	Winter	2011-08-13	August	14:30		Afternoon
815	000	0341	Yes	4	64	258.667	-194.667	2	32	0	0	0	0	0	0	0	0	2	7	Winter	2011-08-13	August	15:00		Afternoon
816	000	0342	Yes	2	32	258.667	-226.667	1	16	0	0	1	0	0	0	0	0	0	2	Winter	2011-08-13	August	15:30		Afternoon
817	000	0343	Yes	1	16	258.667	-242.667	1	16	0	0	0	0	0	0	0	0	0	1	Winter	2011-08-13	August	16:00		Afternoon
818	000	0344	Yes	8	128	258.667	-130.667	7	112	1	0	0	0	0	0	0	0	0	9	Winter	2011-08-13	August	16:30		Afternoon
819	000	0345	Yes	7	112	258.667	-146.667	5	80	0	0	0	0	2	0	0	0	0	8	Winter	2011-08-13	August	17:00		Afternoon
820	000	0346	Yes	35	560	258.667	301.333	11	176	8	2	10	4	0	0	0	0	0	22	Winter	2011-08-13	August	17:30		Afternoon
821	000	0347	Yes	16	256	258.667	-2.66667	6	96	0	9	1	0	0	0	0	0	0	11	Winter	2011-08-13	August	18:00	17:51 set	Dusk
822	000	0348	Yes	44	704	258.667	445.333	17	272	0	4	19	0	2	0	2	0	0	33	Winter	2011-08-13	August	18:30		Dusk
823	000	0349	Yes	49	784	258.667	525.333	41	656	0	1	0	0	2	0	5	0	0	46	Winter	2011-08-13	August	19:00	19:04 end	Dusk
824	000	0350	Yes	19	304	258.667	45.3333	13	208	0	0	3	0	3	0	0	0	0	17	Winter	2011-08-13	August	19:30		Night
825	000	0351	Yes	14	224	258.667	-34.6667	11	176	0	0	1	0	2	0	0	0	0	12	Winter	2011-08-13	August	20:00		Night
826	000	0352	Yes	7	112	258.667	-146.667	7	112	0	0	0	0	0	0	0	0	0	13	Winter	2011-08-13	August	20:30		Night
827	000	0353	Yes	5	80	258.667	-178.667	3	48	0	0	2	0	0	0	0	0	0	5	Winter	2011-08-13	August	21:00		Night
828	000	0354	Yes	3	48	258.667	-210.667	0	0	1	0	0	0	0	0	0	0	2	1	Winter	2011-08-13	August	21:30		Night
829	000	0355	Yes	5	80	258.667	-178.667	1	16	0	1	0	0	3	0	0	0	0	4	Winter	2011-08-13	August	22:00		Night
830	000	0356	Yes	4	64	258.667	-194.667	2	32	0	0	0	0	0	0	0	0	2	4	Winter	2011-08-13	August	22:30		Night
831	000	0357	Yes	10	160	258.667	-98.6667	6	96	0	0	0	0	2	0	2	0	0	8	Winter	2011-08-13	August	23:00		Night
832	000	0358	Yes	11	176	258.667	-82.6667	8	128	0	0	0	0	0	0	0	0	3	9	Winter	2011-08-13	August	23:30		Night
833	000	0359	Yes	8	128	104	24	6	96	0	0	1	0	0	0	0	0	1	8	Winter	2011-08-14	August	0:00		Night
834	000	0360	Yes	23	368	104	264	21	336	0	0	1	0	0	0	0	0	1	29	Winter	2011-08-14	August	0:30		Night
835	000	0361	Yes	6	96	104	-8	0	0	0	0	3	0	3	0	0	0	0	5	Winter	2011-08-14	August	1:00		Night
836	000	0362	Yes	1	16	104	-88	0	0	0	0	1	0	0	0	0	0	0	1	Winter	2011-08-14	August	1:30		Night
837	000	0363	Yes	12	192	104	88	2	32	1	0	6	0	3	0	0	0	0	2	Winter	2011-08-14	August	2:00		Night
838	000	0364	Yes	1	16	104	-88	0	0	0	0	1	0	0	0	0	0	0	0	Winter	2011-08-14	August	2:30		Night
839	000	0365	Yes	1	16	104	-88	0	0	0	0	0	0	0	0	0	0	0	0	Winter	2011-08-14	August	3:00		Night
840	000	0366	Yes	9	144	104	40	3	48	2	0	2	0	1	0	0	1	0	6	Winter	2011-08-14	August	3:30		Night
841	000	0367	Yes	2	32	104	-72	2	32	0	0	0	0	0	0	0	0	0	3	Winter	2011-08-14	August	4:00		Night
842	000	0368	Yes	7	112	104	8	2	32	0	0	0	0	4	0	1	0	0	2	Winter	2011-08-14	August	4:30		Night
843	000	0369	Yes	10	160	104	56	2	32	0	0	1	0	2	0	0	0	5	10	Winter	2011-08-14	August	5:00		Night
844	000	0370	No	0	0	104	-104	0	0	0	0	0	0	0	0	0	0	0	0	Winter	2011-08-14	August	5:30		Night
845	000	0371	Yes	28	448	104	344	16	256	0	0	7	0	3	0	1	0	1	21	Winter	2011-08-14	August	6:00		Night
846	000	0372	Yes	18	288	104	184	0	0	0	0	2	0	10	0	1	0	5	0	Winter	2011-08-14	August	6:30		Night
847	000	0373	Yes	1	16	104	-88	0	0	0	0	1	0	0	0	0	0	0	1	Winter	2011-08-14	August	7:00	6:55 begin	Dawn
848	000	0374	Yes	18	288	104	184	3	48	0	4	2	0	9	0	0	0	0	3	Winter	2011-08-14	August	7:30		Dawn
849	000	0375	Yes	1	16	104	-88	0	0	0	0	1	0	0	0	0	0	0	0	Winter	2011-08-14	August	8:00	8:08 rise	Dawn
850	000	0376	Yes	4	64	104	-40	0	0	0	2	0	0	1	0	0	0	1	4	Winter	2011-08-14	August	8:30		Morning
851	000	0377	Yes	2	32	104	-72	1	16	0	0	1	0	0	0	0	0	0	1	Winter	2011-08-14	August	9:00		Morning
852	000	0378	Yes	2	32	104	-72	1	16	0	0	0	0	1	0	0	0	0	0	Winter	2011-08-14	August	9:30		Morning
853	000	0379	Yes	9	144	104	40	7	112	0	0	2	0	0	0	0	0	0	7	Winter	2011-08-14	August	10:00		Morning
854	000	0380	Yes	12	192	104	88	12	192	0	0	0	0	0	0	0	0	0	14	Winter	2011-08-14	August	10:30		Morning
855	000	0381	Yes	9	144	104	40	7	112	0	2	0	0	0	0	0	0	0	13	Winter	2011-08-14	August	11:00		Morning
856	000	0382	No	0	0	104	-104	0	0	0	0	0	0	0	0	0	0	0	0	Winter	2011-08-14	August	11:30		Morning
857	000	0383	Yes	3	48	104	-56	2	32	0	0	0	0	1	0	0	0	0	6	Winter	2011-08-14	August	12:00		Morning
858	000	0384	Yes	6	96	104	-8	1	16	0	0	0	0	5	0	0	0	0	1	Winter	2011-08-14	August	12:30		Morning
859	000	0385	Yes	1	16	104	-88	1	16	0	0	0	0	0	0	0	0	0	3	Winter	2011-08-14	August	13:00	13:00 transit	Afternoon
860	000	0386	No	0	0	104	-104	0	0	0	0	0	0	0	0	0	0	0	0	Winter	2011-08-14	August	13:30		Afternoon
861	000	0387	Yes	6	96	104	-8	2	32	0	0	1	0	2	0	0	0	1	3	Winter	2011-08-14	August	14:00		Afternoon
862	000	0388	Yes	2	32	104	-72	2	32	0	0	0	0	0	0	0	0	0	8	Winter	2011-08-14	August	14:30		Afternoon
863	000	0389	Yes	8	128	104	24	4	64	0	0	3	0	0	0	0	1	0	5	Winter	2011-08-14	August	15:00		Afternoon
864	000	0390	Yes	10	160	104	56	1	16	0	0	0	0	5	0	2	2	0	4	Winter	2011-08-14	August	15:30		Afternoon
865	000	0391	Yes	9	144	104	40	8	128	1	0	0	0	0	0	0	0	0	8	Winter	2011-08-14	August	16:00		Afternoon
866	000	0392	Yes	2	32	104	-72	2	32	0	0	0	0	0	0	0	0	0	2	Winter	2011-08-14	August	16:30		Afternoon
867	000	0393	Yes	1	16	104	-88	1	16	0	0	0	0	0	0	0	0	0	0	Winter	2011-08-14	August	17:00		Afternoon
868	000	0394	No	0	0	104	-104	0	0	0	0	0	0	0	0	0	0	0	2	Winter	2011-08-14	August	17:30		Afternoon
869	000	0395	Yes	5	80	104	-24	5	80	0	0	0	0	0	0	0	0	0	5	Winter	2011-08-14	August	18:00	17:52 set	Dusk
870	000	0396	Yes	4	64	104	-40	1	16	0	1	0	0	2	0	0	0	0	2	Winter	2011-08-14	August	18:30		Dusk
871	000	0397	Yes	5	80	104	-24	5	80	0	0	0	0	0	0	0	0	0	5	Winter	2011-08-14	August	19:00	19:05 end	Dusk
872	000	0398	Yes	12	192	104	88	5	80	2	0	4	0	0	0	0	0	1	8	Winter	2011-08-14	August	19:30		Night
873	000	0399	Yes	5	80	104	-24	4	64	0	0	1	0	0	0	0	0	0	7	Winter	2011-08-14	August	20:00		Night
874	000	0400	Yes	4	64	104	-40	0	0	0	0	2	0	2	0	0	0	0	1	Winter	2011-08-14	August	20:30		Night
875	000	0401	Yes	6	96	104	-8	3	48	0	1	0	0	2	0	0	0	0	4	Winter	2011-08-14	August	21:00		Night
876	000	0402	No	0	0	104	-104	0	0	0	0	0	0	0	0	0	0	0	0	Winter	2011-08-14	August	21:30		Night
877	000	0403	Yes	5	80	104	-24	3	48	0	1	0	0	0	0	1	0	0	4	Winter	2011-08-14	August	22:00		Night
878	000	0404	Yes	10	160	104	56	0	0	0	0	0	0	10	0	0	0	0	1	Winter	2011-08-14	August	22:30		Night
879	000	0405	Yes	14	224	104	120	0	0	0	0	5	0	6	3	0	0	0	4	Winter	2011-08-14	August	23:00		Night
880	000	0406	Yes	10	160	104	56	2	32	0	0	2	0	6	0	0	0	0	4	Winter	2011-08-14	August	23:30		Night
881	000	0407	Yes	16	256	152	104	1	16	0	0	0	0	0	15	0	0	0	8	Winter	2011-08-15	August	0:00		Night
882	000	0408	Yes	3	48	152	-104	0	0	0	0	0	0	0	3	0	0	0	2	Winter	2011-08-15	August	0:30		Night
883	000	0409	No	0	0	152	-152	0	0	0	0	0	0	0	0	0	0	0	2	Winter	2011-08-15	August	1:00		Night
884	000	0410	Yes	8	128	152	-24	2	32	0	0	0	0	0	0	0	2	4	5	Winter	2011-08-15	August	1:30		Night
885	000	0411	Yes	8	128	152	-24	1	16	0	0	5	0	0	0	1	0	1	5	Winter	2011-08-15	August	2:00		Night
886	000	0412	Yes	5	80	152	-72	0	0	0	0	4	0	0	0	1	0	0	0	Winter	2011-08-15	August	2:30		Night
887	000	0413	Yes	20	320	152	168	7	112	2	0	5	0	3	0	0	0	3	11	Winter	2011-08-15	August	3:00		Night
888	000	0414	Yes	13	208	152	56	3	48	0	7	2	0	0	0	0	0	1	3	Winter	2011-08-15	August	3:30		Night
889	000	0415	Yes	4	64	152	-88	0	0	0	0	0	4	0	0	0	0	0	0	Winter	2011-08-15	August	4:00		Night
890	000	0416	No	0	0	152	-152	0	0	0	0	0	0	0	0	0	0	0	5	Winter	2011-08-15	August	4:30		Night
891	000	0417	Yes	1	16	152	-136	0	0	0	0	0	0	1	0	0	0	0	1	Winter	2011-08-15	August	5:00		Night
892	000	0418	No	0	0	152	-152	0	0	0	0	0	0	0	0	0	0	0	1	Winter	2011-08-15	August	5:30		Night
893	000	0419	Yes	8	128	152	-24	2	32	1	0	0	0	0	0	2	0	3	4	Winter	2011-08-15	August	6:00		Night
894	000	0420	Yes	1	16	152	-136	1	16	0	0	0	0	0	0	0	0	0	2	Winter	2011-08-15	August	6:30		Night
895	000	0421	Yes	1	16	152	-136	0	0	0	0	0	0	0	0	0	0	1	1	Winter	2011-08-15	August	7:00	6:53 begin	Dawn
896	000	0422	Yes	9	144	152	-8	3	48	0	2	1	0	0	0	1	0	2	3	Winter	2011-08-15	August	7:30		Dawn
897	000	0423	No	0	0	152	-152	0	0	0	0	0	0	0	0	0	0	0	0	Winter	2011-08-15	August	8:00	8:06 rise	Dawn
898	000	0424	Yes	8	128	152	-24	0	0	0	2	0	0	0	0	0	0	6	0	Winter	2011-08-15	August	8:30		Morning
899	000	0425	No	0	0	152	-152	0	0	0	0	0	0	0	0	0	0	0	1	Winter	2011-08-15	August	9:00		Morning
900	000	0426	Yes	19	304	152	152	2	32	1	0	3	0	4	0	2	0	7	6	Winter	2011-08-15	August	9:30		Morning
901	000	0427	Yes	15	240	152	88	12	192	0	0	0	0	2	0	1	0	0	17	Winter	2011-08-15	August	10:00		Morning
902	000	0428	Yes	17	272	152	120	1	16	0	5	2	0	0	0	4	0	5	1	Winter	2011-08-15	August	10:30		Morning
903	000	0429	Yes	5	80	152	-72	3	48	0	0	0	0	2	0	0	0	0	3	Winter	2011-08-15	August	11:00		Morning
904	000	0430	Yes	10	160	152	8	2	32	0	0	0	0	1	0	7	0	0	4	Winter	2011-08-15	August	11:30		Morning
905	000	0431	Yes	6	96	152	-56	3	48	0	1	0	0	2	0	0	0	0	3	Winter	2011-08-15	August	12:00		Morning
906	000	0432	Yes	26	416	152	264	10	160	0	7	2	3	0	0	0	0	4	18	Winter	2011-08-15	August	12:30		Morning
907	000	0433	Yes	28	448	152	296	8	128	0	0	2	0	2	7	4	1	4	9	Winter	2011-08-15	August	13:00	13:00 transit	Afternoon
908	000	0434	Yes	16	256	152	104	2	32	1	0	2	0	1	4	0	1	5	8	Winter	2011-08-15	August	13:30		Afternoon
909	000	0435	Yes	22	352	152	200	3	48	1	0	2	0	3	3	10	0	0	7	Winter	2011-08-15	August	14:00		Afternoon
910	000	0436	Yes	13	208	152	56	2	32	0	0	3	0	3	0	2	0	3	6	Winter	2011-08-15	August	14:30		Afternoon
911	000	0437	Yes	8	128	152	-24	0	0	0	0	2	0	5	1	0	0	0	1	Winter	2011-08-15	August	15:00		Afternoon
912	000	0438	Yes	42	672	152	520	1	16	0	0	3	1	18	9	9	1	0	4	Winter	2011-08-15	August	15:30		Afternoon
913	000	0439	Yes	34	544	152	392	0	0	0	1	5	0	8	8	2	0	10	5	Winter	2011-08-15	August	16:00		Afternoon
914	000	0440	Yes	25	400	152	248	0	0	0	0	12	0	5	2	5	0	1	3	Winter	2011-08-15	August	16:30		Afternoon
915	000	0441	Yes	26	416	152	264	4	64	1	0	7	0	3	3	5	0	3	6	Winter	2011-08-15	August	17:00		Afternoon
916	000	0442	Yes	24	384	152	232	1	16	0	2	7	0	0	10	0	0	4	3	Winter	2011-08-15	August	17:30		Afternoon
917	000	0443	Yes	25	400	152	248	0	0	0	2	4	0	8	1	2	0	8	2	Winter	2011-08-15	August	18:00	17:54 set	Dusk
918	000	0444	Yes	30	480	152	328	3	48	1	2	8	0	1	2	6	0	7	9	Winter	2011-08-15	August	18:30		Dusk
919	000	0445	Yes	38	608	152	456	3	48	2	0	11	0	6	4	6	2	4	7	Winter	2011-08-15	August	19:00	19:07 end	Dusk
920	000	0446	Yes	29	464	152	312	4	64	0	1	12	0	6	0	0	1	5	6	Winter	2011-08-15	August	19:30		Night
921	000	0447	Yes	20	320	152	168	1	16	0	0	1	1	5	5	3	1	3	5	Winter	2011-08-15	August	20:00		Night
922	000	0448	Yes	16	256	152	104	6	96	1	0	0	1	2	0	2	1	3	14	Winter	2011-08-15	August	20:30		Night
923	000	0449	Yes	13	208	152	56	1	16	2	0	0	2	1	3	3	0	1	4	Winter	2011-08-15	August	21:00		Night
924	000	0450	Yes	32	512	152	360	5	80	1	0	3	1	9	2	7	0	4	6	Winter	2011-08-15	August	21:30		Night
925	000	0451	Yes	34	544	152	392	5	80	0	2	6	0	2	14	5	0	0	16	Winter	2011-08-15	August	22:00		Night
926	000	0452	Yes	23	368	152	216	6	96	2	0	0	2	0	0	2	0	11	5	Winter	2011-08-15	August	22:30		Night
927	000	0453	Yes	31	496	152	344	0	0	2	4	5	0	5	0	0	0	15	6	Winter	2011-08-15	August	23:00		Night
928	000	0454	Yes	21	336	152	184	2	32	3	1	2	0	5	0	2	0	6	3	Winter	2011-08-15	August	23:30		Night
929	000	0455	Yes	27	432	282	150	1	16	2	5	5	0	12	1	0	0	1	7	Winter	2011-08-16	August	0:00		Night
930	000	0456	Yes	16	256	282	-26	0	0	5	0	0	0	2	6	1	0	2	7	Winter	2011-08-16	August	0:30		Night
931	000	0457	Yes	9	144	282	-138	6	96	0	0	0	0	0	0	0	0	3	3	Winter	2011-08-16	August	1:00		Night
932	000	0458	Yes	12	192	282	-90	2	32	0	2	0	0	0	3	0	0	5	5	Winter	2011-08-16	August	1:30		Night
933	000	0459	Yes	9	144	282	-138	5	80	0	0	2	0	2	0	0	0	0	8	Winter	2011-08-16	August	2:00		Night
934	000	0460	Yes	11	176	282	-106	1	16	0	2	0	0	0	2	0	1	5	4	Winter	2011-08-16	August	2:30		Night
935	000	0461	Yes	5	80	282	-202	2	32	1	0	0	0	2	0	0	0	0	4	Winter	2011-08-16	August	3:00		Night
936	000	0462	Yes	30	480	282	198	0	0	0	0	2	0	6	20	1	0	1	1	Winter	2011-08-16	August	3:30		Night
937	000	0463	Yes	18	288	282	6	3	48	0	0	9	0	0	0	4	0	2	3	Winter	2011-08-16	August	4:00		Night
938	000	0464	Yes	46	736	282	454	3	48	4	7	1	0	8	9	10	0	4	6	Winter	2011-08-16	August	4:30		Night
939	000	0465	Yes	19	304	282	22	2	32	0	0	4	1	0	0	4	0	8	7	Winter	2011-08-16	August	5:00		Night
940	000	0466	Yes	14	224	282	-58	5	80	0	0	2	1	0	4	2	0	0	7	Winter	2011-08-16	August	5:30		Night
941	000	0467	Yes	23	368	282	86	0	0	0	6	1	0	4	1	1	2	8	4	Winter	2011-08-16	August	6:00		Night
942	000	0468	Yes	18	288	282	6	0	0	2	1	3	0	0	0	0	0	12	0	Winter	2011-08-16	August	6:30		Night
943	000	0469	Yes	37	592	282	310	7	112	0	3	3	0	4	2	6	0	12	11	Winter	2011-08-16	August	7:00	6:51 begin	Dawn
944	000	0470	Yes	21	336	282	54	2	32	0	0	0	0	4	4	5	0	6	4	Winter	2011-08-16	August	7:30		Dawn
945	000	0471	Yes	7	112	282	-170	2	32	0	0	2	0	1	0	0	0	2	3	Winter	2011-08-16	August	8:00	8:04 rise	Dawn
946	000	0472	Yes	5	80	282	-202	3	48	0	0	2	0	0	0	0	0	0	3	Winter	2011-08-16	August	8:30		Morning
947	000	0473	Yes	17	272	282	-10	4	64	0	7	0	1	0	0	1	0	4	4	Winter	2011-08-16	August	9:00		Morning
948	000	0474	Yes	21	336	282	54	9	144	0	0	0	0	4	0	3	0	5	12	Winter	2011-08-16	August	9:30		Morning
949	000	0475	Yes	18	288	282	6	6	96	0	0	2	0	3	3	4	0	0	20	Winter	2011-08-16	August	10:00		Morning
950	000	0476	Yes	17	272	282	-10	2	32	0	1	2	0	1	5	4	0	2	5	Winter	2011-08-16	August	10:30		Morning
951	000	0477	Yes	24	384	282	102	1	16	4	0	5	2	0	2	10	0	0	8	Winter	2011-08-16	August	11:00		Morning
952	000	0478	Yes	19	304	282	22	1	16	0	1	0	0	0	17	0	0	0	3	Winter	2011-08-16	August	11:30		Morning
953	000	0479	Yes	9	144	282	-138	2	32	0	0	0	0	0	1	3	0	3	0	Winter	2011-08-16	August	12:00		Morning
954	000	0480	Yes	6	96	282	-186	0	0	0	0	0	0	6	0	0	0	0	2	Winter	2011-08-16	August	12:30		Morning
955	000	0481	Yes	6	96	282	-186	1	16	0	0	0	0	1	0	3	0	1	2	Winter	2011-08-16	August	13:00	12:59 transit	Afternoon
956	000	0482	Yes	5	80	282	-202	0	0	0	0	2	0	0	3	0	0	0	4	Winter	2011-08-16	August	13:30		Afternoon
957	000	0483	Yes	8	128	282	-154	3	48	0	0	0	0	3	2	0	0	0	1	Winter	2011-08-16	August	14:00		Afternoon
958	000	0484	Yes	31	496	282	214	2	32	3	2	4	0	5	14	1	0	0	7	Winter	2011-08-16	August	14:30		Afternoon
959	000	0485	Yes	11	176	282	-106	6	96	0	0	4	0	1	0	0	0	0	9	Winter	2011-08-16	August	15:00		Afternoon
960	000	0486	Yes	3	48	282	-234	2	32	0	0	1	0	0	0	0	0	0	6	Winter	2011-08-16	August	15:30		Afternoon
961	000	0487	Yes	26	416	282	134	13	208	0	0	9	0	0	3	1	0	0	20	Winter	2011-08-16	August	16:00		Afternoon
962	000	0488	Yes	6	96	282	-186	3	48	0	0	1	0	0	0	2	0	0	6	Winter	2011-08-16	August	16:30		Afternoon
963	000	0489	Yes	5	80	282	-202	0	0	1	0	2	0	2	0	0	0	0	3	Winter	2011-08-16	August	17:00		Afternoon
964	000	0490	Yes	13	208	282	-74	0	0	4	0	0	0	5	0	4	0	0	1	Winter	2011-08-16	August	17:30		Afternoon
965	000	0491	Yes	1	16	282	-266	0	0	0	0	0	0	1	0	0	0	0	3	Winter	2011-08-16	August	18:00	17:55 set	Dusk
966	000	0492	Yes	23	368	282	86	6	96	0	10	3	0	4	0	0	0	0	11	Winter	2011-08-16	August	18:30		Dusk
967	000	0493	Yes	31	496	282	214	5	80	1	0	2	0	4	9	2	2	6	7	Winter	2011-08-16	August	19:00	19:08 end	Dusk
968	000	0494	Yes	43	688	282	406	1	16	2	0	0	0	8	23	3	2	4	4	Winter	2011-08-16	August	19:30		Night
969	000	0495	Yes	38	608	282	326	4	64	0	4	6	0	16	6	0	0	2	13	Winter	2011-08-16	August	20:00		Night
970	000	0496	Yes	34	544	282	262	0	0	5	1	1	0	12	4	3	0	8	4	Winter	2011-08-16	August	20:30		Night
971	000	0497	Yes	12	192	282	-90	4	64	0	1	1	0	2	0	0	0	4	13	Winter	2011-08-16	August	21:00		Night
972	000	0498	Yes	15	240	282	-42	5	80	5	0	0	0	0	0	0	3	2	5	Winter	2011-08-16	August	21:30		Night
973	000	0499	Yes	27	432	282	150	3	48	1	0	2	0	7	0	11	0	3	1	Winter	2011-08-16	August	22:00		Night
974	000	0500	Yes	22	352	282	70	4	64	0	0	2	0	0	13	3	0	0	3	Winter	2011-08-16	August	22:30		Night
975	000	0501	Yes	23	368	282	86	3	48	3	0	6	0	4	1	6	0	0	6	Winter	2011-08-16	August	23:00		Night
976	000	0502	Yes	5	80	282	-202	1	16	0	2	0	0	0	0	0	0	2	1	Winter	2011-08-16	August	23:30		Night
977	000	0503	Yes	7	112	233.333	-121.333	1	16	0	0	2	0	0	0	0	3	1	2	Winter	2011-08-17	August	0:00		Night
978	000	0504	Yes	15	240	233.333	6.66667	1	16	0	0	5	0	1	4	4	0	0	2	Winter	2011-08-17	August	0:30		Night
979	000	0505	Yes	18	288	233.333	54.6667	1	16	2	4	0	0	2	3	6	0	0	1	Winter	2011-08-17	August	1:00		Night
980	000	0506	Yes	25	400	233.333	166.667	1	16	0	0	1	0	3	5	11	0	4	1	Winter	2011-08-17	August	1:30		Night
981	000	0507	Yes	18	288	233.333	54.6667	1	16	0	1	7	0	8	0	0	1	0	5	Winter	2011-08-17	August	2:00		Night
982	000	0508	Yes	18	288	233.333	54.6667	8	128	0	0	2	0	2	0	0	0	6	7	Winter	2011-08-17	August	2:30		Night
983	000	0509	Yes	45	720	233.333	486.667	18	288	1	1	10	0	8	0	1	0	6	25	Winter	2011-08-17	August	3:00		Night
984	000	0510	Yes	27	432	233.333	198.667	18	288	0	0	7	0	2	0	0	0	0	19	Winter	2011-08-17	August	3:30		Night
985	000	0511	Yes	8	128	233.333	-105.333	1	16	0	0	0	0	1	0	2	0	4	2	Winter	2011-08-17	August	4:00		Night
986	000	0512	Yes	11	176	233.333	-57.3333	4	64	0	0	2	0	2	0	0	0	3	6	Winter	2011-08-17	August	4:30		Night
987	000	0513	No	0	0	233.333	-233.333	0	0	0	0	0	0	0	0	0	0	0	2	Winter	2011-08-17	August	5:00		Night
988	000	0514	Yes	3	48	233.333	-185.333	1	16	0	0	1	0	0	0	1	0	0	2	Winter	2011-08-17	August	5:30		Night
989	000	0515	No	0	0	233.333	-233.333	0	0	0	0	0	0	0	0	0	0	0	0	Winter	2011-08-17	August	6:00		Night
990	000	0516	Yes	2	32	233.333	-201.333	2	32	0	0	0	0	0	0	0	0	0	3	Winter	2011-08-17	August	6:30		Night
991	000	0517	No	0	0	233.333	-233.333	0	0	0	0	0	0	0	0	0	0	0	0	Winter	2011-08-17	August	7:00	6:50 begin	Dawn
992	000	0518	Yes	7	112	233.333	-121.333	0	0	2	0	1	0	1	0	2	0	1	1	Winter	2011-08-17	August	7:30		Dawn
993	000	0519	Yes	3	48	233.333	-185.333	1	16	1	0	1	0	0	0	0	0	0	2	Winter	2011-08-17	August	8:00	8:02 rise	Dawn
994	000	0520	Yes	21	336	233.333	102.667	4	64	8	0	4	0	3	0	2	0	0	7	Winter	2011-08-17	August	8:30		Morning
995	000	0521	Yes	5	80	233.333	-153.333	3	48	0	0	0	0	2	0	0	0	0	3	Winter	2011-08-17	August	9:00		Morning
996	000	0522	Yes	36	576	233.333	342.667	7	112	0	0	5	0	11	0	7	0	6	13	Winter	2011-08-17	August	9:30		Morning
997	000	0523	Yes	31	496	233.333	262.667	2	32	0	0	8	0	3	12	0	0	6	2	Winter	2011-08-17	August	10:00		Morning
998	000	0524	Yes	34	544	233.333	310.667	0	0	0	0	7	0	11	7	0	0	9	2	Winter	2011-08-17	August	10:30		Morning
999	000	0525	Yes	14	224	233.333	-9.33333	8	128	0	0	0	0	0	3	0	0	3	12	Winter	2011-08-17	August	11:00		Morning
1000	000	0526	Yes	2	32	233.333	-201.333	0	0	0	0	1	0	0	0	0	0	1	0	Winter	2011-08-17	August	11:30		Morning
1001	000	0527	Yes	8	128	233.333	-105.333	0	0	0	0	2	0	6	0	0	0	0	0	Winter	2011-08-17	August	12:00		Morning
1002	000	0528	Yes	3	48	233.333	-185.333	0	0	0	0	2	0	1	0	0	0	0	1	Winter	2011-08-17	August	12:30		Morning
1003	000	0529	Yes	4	64	233.333	-169.333	1	16	0	0	0	0	0	0	0	3	0	0	Winter	2011-08-17	August	13:00	12:59 transit	Afternoon
1004	000	0530	Yes	19	304	233.333	70.6667	1	16	1	0	8	0	5	0	1	0	3	3	Winter	2011-08-17	August	13:30		Afternoon
1005	000	0531	Yes	23	368	233.333	134.667	0	0	1	0	4	0	3	0	1	0	14	4	Winter	2011-08-17	August	14:00		Afternoon
1006	000	0532	Yes	23	368	233.333	134.667	0	0	5	1	10	0	5	1	0	0	1	0	Winter	2011-08-17	August	14:30		Afternoon
1007	000	0533	Yes	19	304	233.333	70.6667	2	32	0	1	1	0	1	8	1	0	5	6	Winter	2011-08-17	August	15:00		Afternoon
1008	000	0534	Yes	17	272	233.333	38.6667	0	0	0	1	4	0	2	3	0	0	7	0	Winter	2011-08-17	August	15:30		Afternoon
1009	000	0535	Yes	28	448	233.333	214.667	3	48	0	1	3	0	7	8	0	0	6	4	Winter	2011-08-17	August	16:00		Afternoon
1010	000	0536	Yes	19	304	233.333	70.6667	1	16	2	0	4	0	3	0	0	0	9	1	Winter	2011-08-17	August	16:30		Afternoon
1011	000	0537	Yes	2	32	233.333	-201.333	1	16	0	0	0	0	0	0	0	1	0	3	Winter	2011-08-17	August	17:00		Afternoon
1012	000	0538	Yes	5	80	233.333	-153.333	4	64	0	0	0	0	1	0	0	0	0	4	Winter	2011-08-17	August	17:30		Afternoon
1013	000	0539	Yes	10	160	233.333	-73.3333	3	48	0	0	4	0	1	0	2	0	0	6	Winter	2011-08-17	August	18:00	17:57 set	Dusk
1014	000	0540	Yes	15	240	233.333	6.66667	5	80	0	0	7	0	2	0	0	0	1	11	Winter	2011-08-17	August	18:30		Dusk
1015	000	0541	Yes	15	240	233.333	6.66667	3	48	0	0	0	2	10	0	0	0	0	7	Winter	2011-08-17	August	19:00	19:09 end	Dusk
1016	000	0542	Yes	23	368	233.333	134.667	5	80	0	3	4	0	0	9	0	0	2	11	Winter	2011-08-17	August	19:30		Night
1017	000	0543	Yes	15	240	233.333	6.66667	7	112	0	0	2	0	2	0	0	0	4	12	Winter	2011-08-17	August	20:00		Night
1018	000	0544	Yes	21	336	233.333	102.667	4	64	3	1	2	0	7	0	0	0	4	8	Winter	2011-08-17	August	20:30		Night
1019	000	0545	Yes	14	224	233.333	-9.33333	0	0	0	0	3	0	3	0	0	0	8	3	Winter	2011-08-17	August	21:00		Night
1020	000	0546	Yes	5	80	233.333	-153.333	0	0	0	0	3	0	0	0	1	0	1	5	Winter	2011-08-17	August	21:30		Night
1021	000	0547	Yes	26	416	233.333	182.667	5	80	0	7	4	0	2	3	0	0	5	5	Winter	2011-08-17	August	22:00		Night
1022	000	0548	Yes	10	160	233.333	-73.3333	3	48	0	1	3	1	1	0	0	0	1	8	Winter	2011-08-17	August	22:30		Night
1023	000	0549	Yes	21	336	233.333	102.667	0	0	0	0	6	1	8	0	2	0	4	9	Winter	2011-08-17	August	23:00		Night
1024	000	0550	Yes	5	80	233.333	-153.333	2	32	0	0	2	0	0	0	0	1	0	2	Winter	2011-08-17	August	23:30		Night
1025	000	0551	Yes	12	192	356.667	-164.667	2	32	3	0	6	0	0	0	0	1	0	9	Winter	2011-08-18	August	0:00		Night
1026	000	0552	Yes	19	304	356.667	-52.6667	5	80	1	2	1	0	1	5	0	0	4	7	Winter	2011-08-18	August	0:30		Night
1027	000	0553	Yes	23	368	356.667	11.3333	0	0	0	0	2	0	1	9	3	0	8	0	Winter	2011-08-18	August	1:00		Night
1028	000	0554	Yes	25	400	356.667	43.3333	0	0	0	4	5	0	5	7	0	0	4	4	Winter	2011-08-18	August	1:30		Night
1029	000	0555	Yes	28	448	356.667	91.3333	5	80	3	3	0	3	2	7	0	0	5	12	Winter	2011-08-18	August	2:00		Night
1030	000	0556	Yes	14	224	356.667	-132.667	3	48	0	0	2	0	0	0	0	0	9	4	Winter	2011-08-18	August	2:30		Night
1031	000	0557	Yes	12	192	356.667	-164.667	3	48	0	0	4	1	2	0	0	0	2	10	Winter	2011-08-18	August	3:00		Night
1032	000	0558	Yes	24	384	356.667	27.3333	17	272	0	0	5	0	0	0	0	0	2	19	Winter	2011-08-18	August	3:30		Night
1033	000	0559	Yes	10	160	356.667	-196.667	6	96	0	0	2	0	0	0	0	0	2	7	Winter	2011-08-18	August	4:00		Night
1034	000	0560	Yes	10	160	356.667	-196.667	0	0	0	0	3	0	7	0	0	0	0	9	Winter	2011-08-18	August	4:30		Night
1035	000	0561	Yes	17	272	356.667	-84.6667	4	64	3	0	7	0	0	0	2	0	1	4	Winter	2011-08-18	August	5:00		Night
1036	000	0562	Yes	3	48	356.667	-308.667	0	0	0	0	3	0	0	0	0	0	0	0	Winter	2011-08-18	August	5:30		Night
1037	000	0563	Yes	3	48	356.667	-308.667	0	0	0	0	0	0	3	0	0	0	0	0	Winter	2011-08-18	August	6:00		Night
1038	000	0564	Yes	8	128	356.667	-228.667	0	0	0	1	0	0	5	0	0	0	2	0	Winter	2011-08-18	August	6:30		Night
1039	000	0565	Yes	14	224	356.667	-132.667	0	0	0	0	6	0	0	0	0	0	8	4	Winter	2011-08-18	August	7:00	6:48 begin	Dawn
1040	000	0566	Yes	2	32	356.667	-324.667	0	0	0	0	0	0	0	2	0	0	0	0	Winter	2011-08-18	August	7:30		Dawn
1041	000	0567	Yes	11	176	356.667	-180.667	0	0	0	1	9	0	0	0	0	0	1	5	Winter	2011-08-18	August	8:00	8:00 rise	Morning
1042	000	0568	Yes	4	64	356.667	-292.667	0	0	0	0	2	0	0	0	1	0	1	0	Winter	2011-08-18	August	8:30		Morning
1043	000	0569	No	0	0	356.667	-356.667	0	0	0	0	0	0	0	0	0	0	0	0	Winter	2011-08-18	August	9:00		Morning
1044	000	0570	Yes	12	192	356.667	-164.667	0	0	0	5	0	0	4	0	1	0	2	1	Winter	2011-08-18	August	9:30		Morning
1045	000	0571	Yes	6	96	356.667	-260.667	4	64	0	1	0	0	1	0	0	0	0	1	Winter	2011-08-18	August	10:00		Morning
1046	000	0572	Yes	1	16	356.667	-340.667	0	0	0	0	0	0	1	0	0	0	0	0	Winter	2011-08-18	August	10:30		Morning
1047	000	0573	Yes	7	112	356.667	-244.667	5	80	0	0	1	0	0	0	0	1	0	5	Winter	2011-08-18	August	11:00		Morning
1048	000	0574	Yes	9	144	356.667	-212.667	0	0	1	0	0	0	0	3	3	0	2	3	Winter	2011-08-18	August	11:30		Morning
1049	000	0575	Yes	19	304	356.667	-52.6667	5	80	2	0	6	0	5	1	0	0	0	8	Winter	2011-08-18	August	12:00		Morning
1050	000	0576	Yes	7	112	356.667	-244.667	0	0	0	0	0	0	0	0	0	0	7	0	Winter	2011-08-18	August	12:30		Morning
1051	000	0577	Yes	20	320	356.667	-36.6667	2	32	2	0	8	0	4	0	0	2	2	4	Winter	2011-08-18	August	13:00	12:59 transit	Afternoon
1052	000	0578	Yes	11	176	356.667	-180.667	1	16	0	0	2	0	4	0	3	1	0	1	Winter	2011-08-18	August	13:30		Afternoon
1053	000	0579	Yes	11	176	356.667	-180.667	7	112	2	0	0	0	2	0	0	0	0	9	Winter	2011-08-18	August	14:00		Afternoon
1054	000	0580	Yes	11	176	356.667	-180.667	0	0	0	0	2	0	9	0	0	0	0	1	Winter	2011-08-18	August	14:30		Afternoon
1055	000	0581	Yes	44	704	356.667	347.333	2	32	2	28	4	0	4	0	0	0	4	4	Winter	2011-08-18	August	15:00		Afternoon
1056	000	0582	Yes	20	320	356.667	-36.6667	3	48	0	0	3	0	6	1	2	0	5	6	Winter	2011-08-18	August	15:30		Afternoon
1057	000	0583	Yes	28	448	356.667	91.3333	4	64	0	7	0	2	6	4	0	0	5	8	Winter	2011-08-18	August	16:00		Afternoon
1058	000	0584	Yes	20	320	356.667	-36.6667	2	32	1	4	0	0	6	0	2	0	5	5	Winter	2011-08-18	August	16:30		Afternoon
1059	000	0585	Yes	33	528	356.667	171.333	12	192	1	3	5	0	4	1	0	0	7	3	Winter	2011-08-18	August	17:00		Afternoon
1060	000	0586	Yes	9	144	356.667	-212.667	2	32	0	0	3	0	4	0	0	0	0	4	Winter	2011-08-18	August	17:30		Afternoon
1061	000	0587	Yes	13	208	356.667	-148.667	2	32	2	3	3	0	2	0	1	0	0	2	Winter	2011-08-18	August	18:00	17:58 set	Dusk
1062	000	0588	Yes	35	560	356.667	203.333	10	160	2	1	8	0	8	0	1	0	5	8	Winter	2011-08-18	August	18:30		Dusk
1063	000	0589	Yes	49	784	356.667	427.333	9	144	3	19	0	3	7	3	3	0	2	9	Winter	2011-08-18	August	19:00	19:11 end	Dusk
1064	000	0590	Yes	85	1360	356.667	1003.33	20	320	2	35	2	0	9	3	8	0	6	16	Winter	2011-08-18	August	19:30		Night
1065	000	0591	Yes	35	560	356.667	203.333	6	96	9	0	6	0	6	0	0	0	8	10	Winter	2011-08-18	August	20:00		Night
1066	000	0592	Yes	35	560	356.667	203.333	14	224	1	0	13	0	4	0	0	0	3	24	Winter	2011-08-18	August	20:30		Night
1067	000	0593	Yes	36	576	356.667	219.333	11	176	1	5	5	0	6	4	0	2	2	13	Winter	2011-08-18	August	21:00		Night
1068	000	0594	Yes	57	912	356.667	555.333	17	272	0	15	10	0	9	0	0	2	4	17	Winter	2011-08-18	August	21:30		Night
1069	000	0595	Yes	54	864	356.667	507.333	11	176	1	3	4	1	7	10	1	0	16	13	Winter	2011-08-18	August	22:00		Night
1070	000	0596	Yes	49	784	356.667	427.333	5	80	2	4	6	0	14	0	9	0	9	9	Winter	2011-08-18	August	22:30		Night
1071	000	0597	Yes	54	864	356.667	507.333	5	80	1	6	9	1	12	9	3	0	8	12	Winter	2011-08-18	August	23:00		Night
1072	000	0598	Yes	61	976	356.667	619.333	14	224	1	0	3	0	28	9	4	0	2	8	Winter	2011-08-18	August	23:30		Night
1073	000	0599	Yes	35	560	445.667	114.333	11	176	2	0	3	0	6	6	5	0	2	8	Winter	2011-08-19	August	0:00		Night
1074	000	0600	Yes	64	1024	445.667	578.333	27	432	2	2	13	0	8	1	2	0	9	27	Winter	2011-08-19	August	0:30		Night
1075	000	0601	Yes	49	784	445.667	338.333	5	80	2	16	4	0	6	0	7	2	7	4	Winter	2011-08-19	August	1:00		Night
1076	000	0602	Yes	21	336	445.667	-109.667	4	64	0	1	1	0	8	0	1	0	6	5	Winter	2011-08-19	August	1:30		Night
1077	000	0603	Yes	26	416	445.667	-29.6667	9	144	2	6	4	0	1	1	1	0	2	19	Winter	2011-08-19	August	2:00		Night
1078	000	0604	Yes	6	96	445.667	-349.667	4	64	0	0	0	1	1	0	0	0	0	5	Winter	2011-08-19	August	2:30		Night
1079	000	0605	Yes	10	160	445.667	-285.667	2	32	0	0	6	0	1	1	0	0	0	5	Winter	2011-08-19	August	3:00		Night
1080	000	0606	Yes	15	240	445.667	-205.667	9	144	0	0	3	0	2	0	1	0	0	15	Winter	2011-08-19	August	3:30		Night
1081	000	0607	Yes	26	416	445.667	-29.6667	3	48	1	0	6	0	12	3	1	0	0	1	Winter	2011-08-19	August	4:00		Night
1082	000	0608	Yes	32	512	445.667	66.3333	6	96	0	3	4	0	13	0	5	0	1	2	Winter	2011-08-19	August	4:30		Night
1083	000	0609	Yes	12	192	445.667	-253.667	3	48	1	0	0	0	6	0	0	0	2	8	Winter	2011-08-19	August	5:00		Night
1084	000	0610	Yes	49	784	445.667	338.333	10	160	0	6	11	0	4	11	0	0	7	8	Winter	2011-08-19	August	5:30		Night
1085	000	0611	Yes	51	816	445.667	370.333	4	64	0	2	22	0	4	8	5	0	6	7	Winter	2011-08-19	August	6:00		Night
1086	000	0612	Yes	20	320	445.667	-125.667	2	32	0	1	0	0	12	0	0	0	5	3	Winter	2011-08-19	August	6:30		Night
1087	000	0613	Yes	12	192	445.667	-253.667	4	64	0	0	3	0	5	0	0	0	0	9	Winter	2011-08-19	August	7:00	6:46 begin	Dawn
1088	000	0614	Yes	11	176	445.667	-269.667	1	16	0	0	3	0	1	0	2	0	4	5	Winter	2011-08-19	August	7:30		Dawn
1089	000	0615	Yes	22	352	445.667	-93.6667	10	160	3	0	1	2	2	0	0	0	4	10	Winter	2011-08-19	August	8:00	7:58 rise	Morning
1090	000	0616	Yes	19	304	445.667	-141.667	4	64	0	0	2	0	2	6	2	1	2	6	Winter	2011-08-19	August	8:30		Morning
1091	000	0617	Yes	31	496	445.667	50.3333	17	272	0	2	4	0	8	0	0	0	0	17	Winter	2011-08-19	August	9:00		Morning
1092	000	0618	Yes	11	176	445.667	-269.667	0	0	0	0	2	0	3	1	0	0	5	2	Winter	2011-08-19	August	9:30		Morning
1093	000	0619	Yes	7	112	445.667	-333.667	0	0	2	0	1	1	0	0	0	0	3	1	Winter	2011-08-19	August	10:00		Morning
1094	000	0620	Yes	25	400	445.667	-45.6667	10	160	0	3	4	1	0	0	2	0	5	11	Winter	2011-08-19	August	10:30		Morning
1095	000	0621	Yes	26	416	445.667	-29.6667	9	144	0	2	2	0	6	5	0	0	2	17	Winter	2011-08-19	August	11:00		Morning
1096	000	0622	Yes	30	480	445.667	34.3333	7	112	1	0	2	0	13	5	1	0	1	7	Winter	2011-08-19	August	11:30		Morning
1097	000	0623	Yes	27	432	445.667	-13.6667	3	48	0	2	1	0	9	5	0	0	7	4	Winter	2011-08-19	August	12:00		Morning
1098	000	0624	Yes	39	624	445.667	178.333	3	48	3	5	3	0	8	0	2	0	15	5	Winter	2011-08-19	August	12:30		Morning
1099	000	0625	Yes	50	800	445.667	354.333	20	320	0	0	8	0	12	0	1	0	9	19	Winter	2011-08-19	August	13:00	12:59 transit	Afternoon
1100	000	0626	Yes	28	448	445.667	2.33333	3	48	1	0	4	0	16	0	2	0	2	4	Winter	2011-08-19	August	13:30		Afternoon
1101	000	0627	Yes	34	544	445.667	98.3333	6	96	4	0	11	0	9	0	0	0	4	5	Winter	2011-08-19	August	14:00		Afternoon
1102	000	0628	Yes	3	48	445.667	-397.667	1	16	1	0	0	0	1	0	0	0	0	1	Winter	2011-08-19	August	14:30		Afternoon
1103	000	0629	Yes	9	144	445.667	-301.667	0	0	0	1	0	0	6	0	0	0	2	2	Winter	2011-08-19	August	15:00		Afternoon
1104	000	0630	Yes	10	160	445.667	-285.667	4	64	0	0	2	0	4	0	0	0	0	5	Winter	2011-08-19	August	15:30		Afternoon
1105	000	0631	Yes	12	192	445.667	-253.667	2	32	1	0	1	0	5	0	0	0	3	4	Winter	2011-08-19	August	16:00		Afternoon
1106	000	0632	Yes	35	560	445.667	114.333	14	224	4	0	6	0	5	4	1	0	1	17	Winter	2011-08-19	August	16:30		Afternoon
1107	000	0633	Yes	19	304	445.667	-141.667	9	144	1	1	1	0	0	0	1	0	6	11	Winter	2011-08-19	August	17:00		Afternoon
1108	000	0634	Yes	19	304	445.667	-141.667	9	144	0	0	0	2	4	0	2	0	2	9	Winter	2011-08-19	August	17:30		Afternoon
1109	000	0635	Yes	23	368	445.667	-77.6667	9	144	0	0	1	0	4	4	2	0	3	11	Winter	2011-08-19	August	18:00	18:00 set	Dusk
1110	000	0636	Yes	61	976	445.667	530.333	28	448	5	4	7	0	4	0	7	0	6	25	Winter	2011-08-19	August	18:30		Dusk
1111	000	0637	Yes	52	832	445.667	386.333	9	144	5	2	7	0	10	3	7	1	8	16	Winter	2011-08-19	August	19:00	19:12 end	Dusk
1112	000	0638	Yes	32	512	445.667	66.3333	15	240	0	1	6	2	5	0	3	0	0	14	Winter	2011-08-19	August	19:30		Night
1113	000	0639	Yes	57	912	445.667	466.333	13	208	6	0	17	0	3	2	7	0	9	15	Winter	2011-08-19	August	20:00		Night
1114	000	0640	Yes	20	320	445.667	-125.667	2	32	0	1	1	0	5	2	2	0	7	5	Winter	2011-08-19	August	20:30		Night
1115	000	0641	Yes	22	352	445.667	-93.6667	8	128	0	0	1	0	8	1	2	0	2	5	Winter	2011-08-19	August	21:00		Night
1116	000	0642	Yes	37	592	445.667	146.333	17	272	0	1	5	0	8	4	0	0	2	13	Winter	2011-08-19	August	21:30		Night
1117	000	0643	Yes	32	512	445.667	66.3333	9	144	3	0	2	0	9	8	0	0	1	9	Winter	2011-08-19	August	22:00		Night
1118	000	0644	Yes	48	768	445.667	322.333	1	16	0	1	3	0	7	22	0	0	14	1	Winter	2011-08-19	August	22:30		Night
1119	000	0645	Yes	39	624	445.667	178.333	6	96	1	0	11	0	5	0	13	0	3	8	Winter	2011-08-19	August	23:00		Night
1120	000	0646	Yes	19	304	445.667	-141.667	4	64	0	0	1	0	3	0	8	0	3	7	Winter	2011-08-19	August	23:30		Night
1121	000	0647	Yes	23	368	145.667	222.333	5	80	0	4	4	0	2	0	2	0	6	8	Winter	2011-08-20	August	0:00		Night
1122	000	0648	Yes	16	256	145.667	110.333	1	16	0	0	2	0	1	5	0	2	5	0	Winter	2011-08-20	August	0:30		Night
1123	000	0649	Yes	15	240	145.667	94.3333	1	16	1	6	4	0	0	0	2	0	1	4	Winter	2011-08-20	August	1:00		Night
1124	000	0650	Yes	3	48	145.667	-97.6667	0	0	1	0	1	0	1	0	0	0	0	3	Winter	2011-08-20	August	1:30		Night
1125	000	0651	Yes	10	160	145.667	14.3333	5	80	1	0	2	0	0	0	0	1	1	9	Winter	2011-08-20	August	2:00		Night
1126	000	0652	Yes	8	128	145.667	-17.6667	3	48	0	0	3	0	2	0	0	0	0	6	Winter	2011-08-20	August	2:30		Night
1127	000	0653	Yes	7	112	145.667	-33.6667	3	48	3	0	0	0	1	0	0	0	0	4	Winter	2011-08-20	August	3:00		Night
1128	000	0654	No	0	0	145.667	-145.667	0	0	0	0	0	0	0	0	0	0	0	1	Winter	2011-08-20	August	3:30		Night
1129	000	0655	Yes	6	96	145.667	-49.6667	0	0	0	0	2	0	1	0	0	1	2	0	Winter	2011-08-20	August	4:00		Night
1130	000	0656	Yes	6	96	145.667	-49.6667	4	64	0	0	0	0	1	0	1	0	0	3	Winter	2011-08-20	August	4:30		Night
1131	000	0657	Yes	15	240	145.667	94.3333	9	144	0	1	0	0	3	0	2	0	0	9	Winter	2011-08-20	August	5:00		Night
1132	000	0658	Yes	3	48	145.667	-97.6667	3	48	0	0	0	0	0	0	0	0	0	6	Winter	2011-08-20	August	5:30		Night
1133	000	0659	Yes	7	112	145.667	-33.6667	4	64	0	0	0	0	1	0	0	2	0	9	Winter	2011-08-20	August	6:00		Night
1134	000	0660	Yes	6	96	145.667	-49.6667	1	16	0	0	4	0	0	0	1	0	0	1	Winter	2011-08-20	August	6:30	6:44 begin	Night
1135	000	0661	No	0	0	145.667	-145.667	0	0	0	0	0	0	0	0	0	0	0	0	Winter	2011-08-20	August	7:00		Dawn
1136	000	0662	No	0	0	145.667	-145.667	0	0	0	0	0	0	0	0	0	0	0	2	Winter	2011-08-20	August	7:30		Dawn
1137	000	0663	Yes	2	32	145.667	-113.667	0	0	0	2	0	0	0	0	0	0	0	1	Winter	2011-08-20	August	8:00	7:56 rise	Morning
1138	000	0664	No	0	0	145.667	-145.667	0	0	0	0	0	0	0	0	0	0	0	2	Winter	2011-08-20	August	8:30		Morning
1139	000	0665	Yes	4	64	145.667	-81.6667	0	0	3	0	1	0	0	0	0	0	0	1	Winter	2011-08-20	August	9:00		Morning
1140	000	0666	Yes	2	32	145.667	-113.667	0	0	0	1	0	0	0	0	1	0	0	1	Winter	2011-08-20	August	9:30		Morning
1141	000	0667	Yes	3	48	145.667	-97.6667	3	48	0	0	0	0	0	0	0	0	0	4	Winter	2011-08-20	August	10:00		Morning
1142	000	0668	No	0	0	145.667	-145.667	0	0	0	0	0	0	0	0	0	0	0	1	Winter	2011-08-20	August	10:30		Morning
1143	000	0669	Yes	1	16	145.667	-129.667	0	0	0	0	0	0	1	0	0	0	0	1	Winter	2011-08-20	August	11:00		Morning
1144	000	0670	Yes	10	160	145.667	14.3333	1	16	0	0	0	0	1	8	0	0	0	3	Winter	2011-08-20	August	11:30		Morning
1145	000	0671	Yes	3	48	145.667	-97.6667	0	0	0	0	0	0	0	0	0	0	3	1	Winter	2011-08-20	August	12:00		Morning
1146	000	0672	Yes	20	320	145.667	174.333	12	192	0	6	0	0	0	0	0	0	2	11	Winter	2011-08-20	August	12:30		Morning
1147	000	0673	Yes	13	208	145.667	62.3333	1	16	0	0	0	0	8	4	0	0	0	3	Winter	2011-08-20	August	13:00	12:59 transit	Afternoon
1148	000	0674	Yes	13	208	145.667	62.3333	7	112	0	5	0	0	1	0	0	0	0	7	Winter	2011-08-20	August	13:30		Afternoon
1149	000	0675	Yes	15	240	145.667	94.3333	12	192	0	0	3	0	0	0	0	0	0	11	Winter	2011-08-20	August	14:00		Afternoon
1150	000	0676	Yes	5	80	145.667	-65.6667	3	48	2	0	0	0	0	0	0	0	0	7	Winter	2011-08-20	August	14:30		Afternoon
1151	000	0677	Yes	8	128	145.667	-17.6667	4	64	0	0	1	0	1	2	0	0	0	20	Winter	2011-08-20	August	15:00		Afternoon
1152	000	0678	Yes	4	64	145.667	-81.6667	0	0	0	0	3	0	1	0	0	0	0	9	Winter	2011-08-20	August	15:30		Afternoon
1153	000	0679	Yes	2	32	145.667	-113.667	1	16	0	0	0	0	1	0	0	0	0	1	Winter	2011-08-20	August	16:00		Afternoon
1154	000	0680	Yes	13	208	145.667	62.3333	11	176	0	0	0	0	1	0	1	0	0	11	Winter	2011-08-20	August	16:30		Afternoon
1155	000	0681	Yes	10	160	145.667	14.3333	5	80	0	0	1	0	4	0	0	0	0	9	Winter	2011-08-20	August	17:00		Afternoon
1156	000	0682	Yes	8	128	145.667	-17.6667	4	64	0	1	0	0	2	0	0	1	0	8	Winter	2011-08-20	August	17:30		Afternoon
1157	000	0683	Yes	5	80	145.667	-65.6667	2	32	0	0	2	0	0	0	0	1	0	1	Winter	2011-08-20	August	18:00	18:01 set	Dusk
1158	000	0684	Yes	14	224	145.667	78.3333	10	160	0	0	3	0	1	0	0	0	0	9	Winter	2011-08-20	August	18:30		Dusk
1159	000	0685	Yes	10	160	145.667	14.3333	3	48	0	0	7	0	0	0	0	0	0	6	Winter	2011-08-20	August	19:00	19:13 end	Dusk
1160	000	0686	Yes	6	96	145.667	-49.6667	0	0	0	0	0	0	0	0	0	6	0	0	Winter	2011-08-20	August	19:30		Night
1161	000	0687	Yes	3	48	145.667	-97.6667	3	48	0	0	0	0	0	0	0	0	0	2	Winter	2011-08-20	August	20:00		Night
1162	000	0688	Yes	9	144	145.667	-1.66667	0	0	0	2	1	1	2	0	2	1	0	2	Winter	2011-08-20	August	20:30		Night
1163	000	0689	Yes	24	384	145.667	238.333	8	128	1	5	0	1	1	0	0	0	8	12	Winter	2011-08-20	August	21:00		Night
1164	000	0690	Yes	12	192	145.667	46.3333	2	32	0	4	0	0	0	0	3	0	3	3	Winter	2011-08-20	August	21:30		Night
1165	000	0691	Yes	16	256	145.667	110.333	12	192	0	0	0	0	3	0	1	0	0	17	Winter	2011-08-20	August	22:00		Night
1166	000	0692	Yes	17	272	145.667	126.333	0	0	0	2	0	0	3	12	0	0	0	0	Winter	2011-08-20	August	22:30		Night
1167	000	0693	Yes	26	416	145.667	270.333	2	32	2	3	2	0	2	2	2	5	6	4	Winter	2011-08-20	August	23:00		Night
1168	000	0694	Yes	34	544	145.667	398.333	9	144	5	2	3	0	4	1	2	0	8	7	Winter	2011-08-20	August	23:30		Night
1169	000	0695	Yes	33	528	323.667	204.333	21	336	1	0	6	2	1	0	0	0	2	32	Winter	2011-08-21	August	0:00		Night
1170	000	0696	Yes	54	864	323.667	540.333	3	48	0	0	10	0	4	36	0	0	1	6	Winter	2011-08-21	August	0:30		Night
1171	000	0697	Yes	5	80	323.667	-243.667	0	0	0	0	1	0	1	0	0	0	3	2	Winter	2011-08-21	August	1:00		Night
1172	000	0698	Yes	26	416	323.667	92.3333	7	112	1	0	4	0	1	0	5	0	8	10	Winter	2011-08-21	August	1:30		Night
1173	000	0699	Yes	36	576	323.667	252.333	2	32	5	1	3	0	5	2	5	0	13	9	Winter	2011-08-21	August	2:00		Night
1174	000	0700	Yes	21	336	323.667	12.3333	11	176	0	0	1	0	5	1	0	0	3	12	Winter	2011-08-21	August	2:30		Night
1175	000	0701	Yes	8	128	323.667	-195.667	0	0	1	3	2	0	2	0	0	0	0	6	Winter	2011-08-21	August	3:00		Night
1176	000	0702	Yes	16	256	323.667	-67.6667	8	128	0	0	1	0	2	0	3	0	2	13	Winter	2011-08-21	August	3:30		Night
1177	000	0703	Yes	18	288	323.667	-35.6667	17	272	0	0	1	0	0	0	0	0	0	21	Winter	2011-08-21	August	4:00		Night
1178	000	0704	Yes	4	64	323.667	-259.667	0	0	0	0	2	0	2	0	0	0	0	3	Winter	2011-08-21	August	4:30		Night
1179	000	0705	Yes	9	144	323.667	-179.667	4	64	0	2	2	0	0	1	0	0	0	6	Winter	2011-08-21	August	5:00		Night
1180	000	0706	Yes	14	224	323.667	-99.6667	10	160	0	0	1	0	0	0	0	0	3	11	Winter	2011-08-21	August	5:30		Night
1181	000	0707	Yes	1	16	323.667	-307.667	0	0	0	0	0	0	1	0	0	0	0	0	Winter	2011-08-21	August	6:00		Night
1182	000	0708	Yes	10	160	323.667	-163.667	4	64	0	0	0	0	6	0	0	0	0	7	Winter	2011-08-21	August	6:30	6:43 begin	Night
1183	000	0709	Yes	12	192	323.667	-131.667	6	96	0	2	0	0	4	0	0	0	0	7	Winter	2011-08-21	August	7:00		Dawn
1184	000	0710	Yes	6	96	323.667	-227.667	1	16	0	3	0	0	2	0	0	0	0	9	Winter	2011-08-21	August	7:30		Dawn
1185	000	0711	Yes	4	64	323.667	-259.667	4	64	0	0	0	0	0	0	0	0	0	6	Winter	2011-08-21	August	8:00	7:54 rise	Morning
1186	000	0712	Yes	7	112	323.667	-211.667	6	96	0	0	0	0	0	0	0	0	1	5	Winter	2011-08-21	August	8:30		Morning
1187	000	0713	Yes	27	432	323.667	108.333	15	240	0	3	3	0	3	0	0	0	3	16	Winter	2011-08-21	August	9:00		Morning
1188	000	0714	Yes	11	176	323.667	-147.667	1	16	2	1	3	0	3	0	0	0	1	1	Winter	2011-08-21	August	9:30		Morning
1189	000	0715	Yes	15	240	323.667	-83.6667	7	112	0	0	2	0	3	2	0	0	1	7	Winter	2011-08-21	August	10:00		Morning
1190	000	0716	Yes	15	240	323.667	-83.6667	1	16	0	0	5	0	3	0	1	0	5	4	Winter	2011-08-21	August	10:30		Morning
1191	000	0717	Yes	38	608	323.667	284.333	0	0	0	2	1	0	2	25	0	0	8	2	Winter	2011-08-21	August	11:00		Morning
1192	000	0718	Yes	34	544	323.667	220.333	1	16	0	1	2	0	6	20	0	0	4	3	Winter	2011-08-21	August	11:30		Morning
1193	000	0719	Yes	29	464	323.667	140.333	0	0	0	1	1	0	6	15	0	0	6	6	Winter	2011-08-21	August	12:00		Morning
1194	000	0720	Yes	22	352	323.667	28.3333	1	16	2	2	1	0	0	3	2	0	11	1	Winter	2011-08-21	August	12:30		Morning
1195	000	0721	Yes	30	480	323.667	156.333	3	48	0	2	6	0	2	6	3	0	8	10	Winter	2011-08-21	August	13:00	12:58 transit	Afternoon
1196	000	0722	Yes	11	176	323.667	-147.667	4	64	1	1	0	0	0	1	1	0	3	3	Winter	2011-08-21	August	13:30		Afternoon
1197	000	0723	Yes	32	512	323.667	188.333	4	64	2	7	12	0	0	3	0	0	4	11	Winter	2011-08-21	August	14:00		Afternoon
1198	000	0724	Yes	11	176	323.667	-147.667	0	0	0	0	4	0	2	0	2	0	3	2	Winter	2011-08-21	August	14:30		Afternoon
1199	000	0725	Yes	19	304	323.667	-19.6667	0	0	8	1	6	0	0	0	2	0	2	4	Winter	2011-08-21	August	15:00		Afternoon
1200	000	0726	Yes	14	224	323.667	-99.6667	2	32	2	0	4	0	4	0	0	0	2	4	Winter	2011-08-21	August	15:30		Afternoon
1201	000	0727	Yes	24	384	323.667	60.3333	4	64	2	2	2	0	6	1	0	0	7	3	Winter	2011-08-21	August	16:00		Afternoon
1202	000	0728	Yes	7	112	323.667	-211.667	1	16	2	0	0	0	0	2	0	0	2	1	Winter	2011-08-21	August	16:30		Afternoon
1203	000	0729	Yes	14	224	323.667	-99.6667	7	112	0	0	1	0	4	0	2	0	0	10	Winter	2011-08-21	August	17:00		Afternoon
1204	000	0730	Yes	17	272	323.667	-51.6667	7	112	0	0	4	0	3	0	2	0	1	11	Winter	2011-08-21	August	17:30		Afternoon
1205	000	0731	Yes	7	112	323.667	-211.667	0	0	0	1	2	0	3	0	1	0	0	2	Winter	2011-08-21	August	18:00	18:03 set	Afternoon
1206	000	0732	Yes	16	256	323.667	-67.6667	3	48	0	2	2	1	0	1	1	0	6	9	Winter	2011-08-21	August	18:30		Dusk
1207	000	0733	Yes	31	496	323.667	172.333	7	112	2	0	7	0	4	1	0	0	10	12	Winter	2011-08-21	August	19:00		Dusk
1208	000	0734	Yes	23	368	323.667	44.3333	6	96	0	0	5	0	4	0	0	0	8	7	Winter	2011-08-21	August	19:30	19:15 end	Night
1209	000	0735	Yes	17	272	323.667	-51.6667	7	112	0	0	2	0	4	0	0	0	4	5	Winter	2011-08-21	August	20:00		Night
1210	000	0736	Yes	24	384	323.667	60.3333	2	32	1	1	6	0	3	0	6	0	5	7	Winter	2011-08-21	August	20:30		Night
1211	000	0737	Yes	62	992	323.667	668.333	5	80	5	10	17	6	10	2	2	0	5	13	Winter	2011-08-21	August	21:00		Night
1212	000	0738	Yes	39	624	323.667	300.333	4	64	3	0	4	0	16	2	1	2	7	6	Winter	2011-08-21	August	21:30		Night
1213	000	0739	Yes	31	496	323.667	172.333	4	64	0	4	8	4	4	0	3	0	4	3	Winter	2011-08-21	August	22:00		Night
1214	000	0740	Yes	27	432	323.667	108.333	10	160	2	3	2	0	5	0	0	2	3	13	Winter	2011-08-21	August	22:30		Night
1215	000	0741	Yes	22	352	323.667	28.3333	12	192	0	2	0	0	4	0	0	4	0	12	Winter	2011-08-21	August	23:00		Night
1216	000	0742	Yes	18	288	323.667	-35.6667	4	64	3	3	0	0	6	1	0	0	1	8	Winter	2011-08-21	August	23:30		Night
1217	000	0743	Yes	28	448	207.333	240.667	5	80	2	2	9	0	4	0	0	0	6	12	Winter	2011-08-22	August	0:00		Night
1218	000	0744	Yes	23	368	207.333	160.667	0	0	0	2	3	0	8	2	2	1	5	3	Winter	2011-08-22	August	0:30		Night
1219	000	0745	Yes	27	432	207.333	224.667	7	112	0	3	4	0	5	3	3	0	2	6	Winter	2011-08-22	August	1:00		Night
1220	000	0746	Yes	23	368	207.333	160.667	10	160	2	0	3	0	1	4	2	0	1	20	Winter	2011-08-22	August	1:30		Night
1221	000	0747	Yes	43	688	207.333	480.667	10	160	4	1	3	0	16	2	7	0	0	14	Winter	2011-08-22	August	2:00		Night
1222	000	0748	Yes	6	96	207.333	-111.333	4	64	0	0	0	0	2	0	0	0	0	9	Winter	2011-08-22	August	2:30		Night
1223	000	0749	No	0	0	207.333	-207.333	0	0	0	0	0	0	0	0	0	0	0	0	Winter	2011-08-22	August	3:00		Night
1224	000	0750	Yes	10	160	207.333	-47.3333	7	112	0	3	0	0	0	0	0	0	0	9	Winter	2011-08-22	August	3:30		Night
1225	000	0751	Yes	19	304	207.333	96.6667	14	224	0	2	1	0	2	0	0	0	0	9	Winter	2011-08-22	August	4:00		Night
1226	000	0752	Yes	3	48	207.333	-159.333	3	48	0	0	0	0	0	0	0	0	0	4	Winter	2011-08-22	August	4:30		Night
1227	000	0753	No	0	0	207.333	-207.333	0	0	0	0	0	0	0	0	0	0	0	0	Winter	2011-08-22	August	5:00		Night
1228	000	0754	Yes	6	96	207.333	-111.333	6	96	0	0	0	0	0	0	0	0	0	8	Winter	2011-08-22	August	5:30		Night
1229	000	0755	Yes	10	160	207.333	-47.3333	5	80	0	3	1	0	0	0	1	0	0	8	Winter	2011-08-22	August	6:00		Night
1230	000	0756	Yes	7	112	207.333	-95.3333	0	0	0	1	0	0	4	0	1	1	0	2	Winter	2011-08-22	August	6:30	6:41 begin	Night
1231	000	0757	No	0	0	207.333	-207.333	0	0	0	0	0	0	0	0	0	0	0	0	Winter	2011-08-22	August	7:00		Dawn
1232	000	0758	No	0	0	207.333	-207.333	0	0	0	0	0	0	0	0	0	0	0	0	Winter	2011-08-22	August	7:30		Dawn
1233	000	0759	Yes	2	32	207.333	-175.333	0	0	0	1	0	0	1	0	0	0	0	0	Winter	2011-08-22	August	8:00	7:53 rise	Morning
1234	000	0760	Yes	6	96	207.333	-111.333	2	32	0	0	4	0	0	0	0	0	0	2	Winter	2011-08-22	August	8:30		Morning
1235	000	0761	No	0	0	207.333	-207.333	0	0	0	0	0	0	0	0	0	0	0	0	Winter	2011-08-22	August	9:00		Morning
1236	000	0762	Yes	3	48	207.333	-159.333	2	32	0	0	1	0	0	0	0	0	0	3	Winter	2011-08-22	August	9:30		Morning
1237	000	0763	No	0	0	207.333	-207.333	0	0	0	0	0	0	0	0	0	0	0	1	Winter	2011-08-22	August	10:00		Morning
1238	000	0764	Yes	5	80	207.333	-127.333	2	32	0	0	3	0	0	0	0	0	0	2	Winter	2011-08-22	August	10:30		Morning
1239	000	0765	Yes	7	112	207.333	-95.3333	3	48	0	0	0	0	2	2	0	0	0	4	Winter	2011-08-22	August	11:00		Morning
1240	000	0766	Yes	14	224	207.333	16.6667	3	48	0	3	0	0	0	8	0	0	0	7	Winter	2011-08-22	August	11:30		Morning
1241	000	0767	Yes	2	32	207.333	-175.333	0	0	0	0	0	0	2	0	0	0	0	0	Winter	2011-08-22	August	12:00		Morning
1242	000	0768	Yes	11	176	207.333	-31.3333	8	128	0	2	1	0	0	0	0	0	0	7	Winter	2011-08-22	August	12:30		Morning
1243	000	0769	Yes	14	224	207.333	16.6667	7	112	0	2	1	0	1	0	3	0	0	7	Winter	2011-08-22	August	13:00	12:58 transit	Afternoon
1244	000	0770	Yes	28	448	207.333	240.667	8	128	4	1	9	0	4	0	2	0	0	7	Winter	2011-08-22	August	13:30		Afternoon
1245	000	0771	Yes	30	480	207.333	272.667	15	240	10	0	2	0	3	0	0	0	0	18	Winter	2011-08-22	August	14:00		Afternoon
1246	000	0772	Yes	29	464	207.333	256.667	26	416	0	0	3	0	0	0	0	0	0	31	Winter	2011-08-22	August	14:30		Afternoon
1247	000	0773	Yes	10	160	207.333	-47.3333	8	128	0	0	0	0	2	0	0	0	0	11	Winter	2011-08-22	August	15:00		Afternoon
1248	000	0774	Yes	23	368	207.333	160.667	12	192	0	0	1	0	0	8	2	0	0	12	Winter	2011-08-22	August	15:30		Afternoon
1249	000	0775	Yes	6	96	207.333	-111.333	2	32	0	0	2	0	2	0	0	0	0	6	Winter	2011-08-22	August	16:00		Afternoon
1250	000	0776	Yes	12	192	207.333	-15.3333	0	0	0	3	0	0	0	5	0	0	4	7	Winter	2011-08-22	August	16:30		Afternoon
1251	000	0777	Yes	19	304	207.333	96.6667	2	32	0	2	0	0	2	13	0	0	0	5	Winter	2011-08-22	August	17:00		Afternoon
1252	000	0778	Yes	4	64	207.333	-143.333	0	0	0	0	2	0	2	0	0	0	0	1	Winter	2011-08-22	August	17:30		Afternoon
1253	000	0779	Yes	6	96	207.333	-111.333	0	0	0	0	2	0	2	0	2	0	0	2	Winter	2011-08-22	August	18:00	18:04 set	Dusk
1254	000	0780	Yes	31	496	207.333	288.667	11	176	3	1	2	0	8	0	4	0	2	14	Winter	2011-08-22	August	18:30		Dusk
1255	000	0781	Yes	25	400	207.333	192.667	10	160	0	0	0	1	6	0	2	0	6	14	Winter	2011-08-22	August	19:00		Dusk
1256	000	0782	Yes	26	416	207.333	208.667	18	288	0	5	0	1	2	0	0	0	0	22	Winter	2011-08-22	August	19:30	19:16 end	Night
1257	000	0783	Yes	18	288	207.333	80.6667	7	112	0	1	0	0	4	0	4	0	2	20	Winter	2011-08-22	August	20:00		Night
1258	000	0784	Yes	12	192	207.333	-15.3333	3	48	4	0	0	0	3	2	0	0	0	5	Winter	2011-08-22	August	20:30		Night
1259	000	0785	Yes	24	384	207.333	176.667	15	240	1	0	7	0	1	0	0	0	0	14	Winter	2011-08-22	August	21:00		Night
1260	000	0786	Yes	20	320	207.333	112.667	12	192	0	0	4	0	0	1	0	0	3	23	Winter	2011-08-22	August	21:30		Night
1261	000	0787	Yes	11	176	207.333	-31.3333	0	0	1	0	3	0	3	4	0	0	0	3	Winter	2011-08-22	August	22:00		Night
1262	000	0788	Yes	6	96	207.333	-111.333	4	64	0	0	0	0	0	0	0	0	2	7	Winter	2011-08-22	August	22:30		Night
1263	000	0789	Yes	8	128	207.333	-79.3333	6	96	0	0	2	0	0	0	0	0	0	11	Winter	2011-08-22	August	23:00		Night
1264	000	0790	Yes	5	80	207.333	-127.333	5	80	0	0	0	0	0	0	0	0	0	8	Winter	2011-08-22	August	23:30		Night
1265	000	0791	Yes	6	96	111	-15	3	48	0	0	1	0	2	0	0	0	0	8	Winter	2011-08-23	August	0:00		Night
1266	000	0792	Yes	1	16	111	-95	1	16	0	0	0	0	0	0	0	0	0	1	Winter	2011-08-23	August	0:30		Night
1267	000	0793	Yes	14	224	111	113	12	192	0	0	2	0	0	0	0	0	0	13	Winter	2011-08-23	August	1:00		Night
1268	000	0794	Yes	24	384	111	273	21	336	0	0	3	0	0	0	0	0	0	18	Winter	2011-08-23	August	1:30		Night
1269	000	0795	Yes	7	112	111	1	6	96	0	0	0	0	0	0	0	1	0	5	Winter	2011-08-23	August	2:00		Night
1270	000	0796	Yes	8	128	111	17	3	48	1	0	4	0	0	0	0	0	0	12	Winter	2011-08-23	August	2:30		Night
1271	000	0797	Yes	15	240	111	129	10	160	1	0	3	0	1	0	0	0	0	17	Winter	2011-08-23	August	3:00		Night
1272	000	0798	Yes	6	96	111	-15	1	16	0	4	1	0	0	0	0	0	0	2	Winter	2011-08-23	August	3:30		Night
1273	000	0799	Yes	8	128	111	17	5	80	0	0	3	0	0	0	0	0	0	8	Winter	2011-08-23	August	4:00		Night
1274	000	0800	Yes	8	128	111	17	5	80	0	0	0	0	1	0	2	0	0	6	Winter	2011-08-23	August	4:30		Night
1275	000	0801	Yes	9	144	111	33	0	0	0	6	1	0	2	0	0	0	0	4	Winter	2011-08-23	August	5:00		Night
1276	000	0802	Yes	4	64	111	-47	4	64	0	0	0	0	0	0	0	0	0	6	Winter	2011-08-23	August	5:30		Night
1277	000	0803	Yes	14	224	111	113	5	80	0	4	5	0	0	0	0	0	0	3	Winter	2011-08-23	August	6:00		Night
1278	000	0804	Yes	1	16	111	-95	0	0	0	0	0	0	1	0	0	0	0	1	Winter	2011-08-23	August	6:30	6:39 begin	Dawn
1279	000	0805	Yes	14	224	111	113	2	32	0	8	4	0	0	0	0	0	0	2	Winter	2011-08-23	August	7:00		Dawn
1280	000	0806	Yes	3	48	111	-63	3	48	0	0	0	0	0	0	0	0	0	5	Winter	2011-08-23	August	7:30		Dawn
1281	000	0807	No	0	0	111	-111	0	0	0	0	0	0	0	0	0	0	0	1	Winter	2011-08-23	August	8:00	7:51 rise	Morning
1282	000	0808	Yes	1	16	111	-95	1	16	0	0	0	0	0	0	0	0	0	2	Winter	2011-08-23	August	8:30		Morning
1283	000	0809	Yes	10	160	111	49	9	144	1	0	0	0	0	0	0	0	0	10	Winter	2011-08-23	August	9:00		Morning
1284	000	0810	Yes	5	80	111	-31	4	64	0	0	1	0	0	0	0	0	0	4	Winter	2011-08-23	August	9:30		Morning
1285	000	0811	Yes	1	16	111	-95	1	16	0	0	0	0	0	0	0	0	0	7	Winter	2011-08-23	August	10:00		Morning
1286	000	0812	Yes	7	112	111	1	1	16	0	2	1	0	3	0	0	0	0	3	Winter	2011-08-23	August	10:30		Morning
1287	000	0813	Yes	2	32	111	-79	2	32	0	0	0	0	0	0	0	0	0	7	Winter	2011-08-23	August	11:00		Morning
1288	000	0814	Yes	5	80	111	-31	4	64	0	0	0	0	0	0	1	0	0	9	Winter	2011-08-23	August	11:30		Morning
1289	000	0815	Yes	15	240	111	129	13	208	1	0	1	0	0	0	0	0	0	17	Winter	2011-08-23	August	12:00		Morning
1290	000	0816	Yes	4	64	111	-47	1	16	0	0	0	0	2	0	0	0	1	5	Winter	2011-08-23	August	12:30		Morning
1291	000	0817	Yes	7	112	111	1	3	48	0	0	2	0	1	0	1	0	0	7	Winter	2011-08-23	August	13:00	12:58 transit	Afternoon
1292	000	0818	Yes	6	96	111	-15	6	96	0	0	0	0	0	0	0	0	0	5	Winter	2011-08-23	August	13:30		Afternoon
1293	000	0819	Yes	12	192	111	81	9	144	0	0	1	0	0	0	0	0	2	9	Winter	2011-08-23	August	14:00		Afternoon
1294	000	0820	Yes	7	112	111	1	4	64	0	0	1	0	0	0	0	0	2	8	Winter	2011-08-23	August	14:30		Afternoon
1295	000	0821	No	0	0	111	-111	0	0	0	0	0	0	0	0	0	0	0	0	Winter	2011-08-23	August	15:00		Afternoon
1296	000	0822	Yes	2	32	111	-79	1	16	0	0	0	0	0	0	0	0	1	2	Winter	2011-08-23	August	15:30		Afternoon
1297	000	0823	Yes	6	96	111	-15	3	48	0	1	2	0	0	0	0	0	0	4	Winter	2011-08-23	August	16:00		Afternoon
1298	000	0824	Yes	2	32	111	-79	0	0	0	0	2	0	0	0	0	0	0	1	Winter	2011-08-23	August	16:30		Afternoon
1299	000	0825	Yes	1	16	111	-95	1	16	0	0	0	0	0	0	0	0	0	0	Winter	2011-08-23	August	17:00		Afternoon
1300	000	0826	No	0	0	111	-111	0	0	0	0	0	0	0	0	0	0	0	0	Winter	2011-08-23	August	17:30		Afternoon
1301	000	0827	Yes	1	16	111	-95	0	0	0	0	1	0	0	0	0	0	0	0	Winter	2011-08-23	August	18:00	18:06 set	Afternoon
1302	000	0828	Yes	2	32	111	-79	2	32	0	0	0	0	0	0	0	0	0	4	Winter	2011-08-23	August	18:30		Dusk
1303	000	0829	Yes	1	16	111	-95	1	16	0	0	0	0	0	0	0	0	0	3	Winter	2011-08-23	August	19:00		Dusk
1304	000	0830	Yes	5	80	111	-31	3	48	0	0	2	0	0	0	0	0	0	7	Winter	2011-08-23	August	19:30	19:17 end	Night
1305	000	0831	Yes	2	32	111	-79	2	32	0	0	0	0	0	0	0	0	0	7	Winter	2011-08-23	August	20:00		Night
1306	000	0832	Yes	10	160	111	49	7	112	3	0	0	0	0	0	0	0	0	10	Winter	2011-08-23	August	20:30		Night
1307	000	0833	Yes	3	48	111	-63	3	48	0	0	0	0	0	0	0	0	0	7	Winter	2011-08-23	August	21:00		Night
1308	000	0834	Yes	25	400	111	289	9	144	0	0	16	0	0	0	0	0	0	18	Winter	2011-08-23	August	21:30		Night
1309	000	0835	Yes	12	192	111	81	5	80	0	4	0	0	3	0	0	0	0	7	Winter	2011-08-23	August	22:00		Night
1310	000	0836	Yes	16	256	111	145	16	256	0	0	0	0	0	0	0	0	0	19	Winter	2011-08-23	August	22:30		Night
1311	000	0837	Yes	8	128	111	17	5	80	1	0	2	0	0	0	0	0	0	7	Winter	2011-08-23	August	23:00		Night
1312	000	0838	Yes	13	208	111	97	13	208	0	0	0	0	0	0	0	0	0	19	Winter	2011-08-23	August	23:30		Night
1313	000	0839	Yes	11	176	199.333	-23.3333	9	144	2	0	0	0	0	0	0	0	0	12	Winter	2011-08-24	August	0:00		Night
1314	000	0840	Yes	1	16	199.333	-183.333	0	0	0	0	0	0	1	0	0	0	0	0	Winter	2011-08-24	August	0:30		Night
1315	000	0841	Yes	5	80	199.333	-119.333	5	80	0	0	0	0	0	0	0	0	0	5	Winter	2011-08-24	August	1:00		Night
1316	000	0842	Yes	9	144	199.333	-55.3333	3	48	3	0	3	0	0	0	0	0	0	3	Winter	2011-08-24	August	1:30		Night
1317	000	0843	Yes	11	176	199.333	-23.3333	7	112	0	0	3	0	1	0	0	0	0	5	Winter	2011-08-24	August	2:00		Night
1318	000	0844	Yes	9	144	199.333	-55.3333	0	0	0	3	3	0	3	0	0	0	0	4	Winter	2011-08-24	August	2:30		Night
1319	000	0845	Yes	10	160	199.333	-39.3333	3	48	0	0	7	0	0	0	0	0	0	10	Winter	2011-08-24	August	3:00		Night
1320	000	0846	Yes	4	64	199.333	-135.333	2	32	0	0	0	0	2	0	0	0	0	4	Winter	2011-08-24	August	3:30		Night
1321	000	0847	Yes	18	288	199.333	88.6667	11	176	2	0	5	0	0	0	0	0	0	14	Winter	2011-08-24	August	4:00		Night
1322	000	0848	No	0	0	199.333	-199.333	0	0	0	0	0	0	0	0	0	0	0	2	Winter	2011-08-24	August	4:30		Night
1323	000	0849	Yes	1	16	199.333	-183.333	0	0	0	0	0	0	0	0	0	0	1	3	Winter	2011-08-24	August	5:00		Night
1324	000	0850	No	0	0	199.333	-199.333	0	0	0	0	0	0	0	0	0	0	0	1	Winter	2011-08-24	August	5:30		Night
1325	000	0851	Yes	8	128	199.333	-71.3333	2	32	0	0	5	0	1	0	0	0	0	9	Winter	2011-08-24	August	6:00		Night
1326	000	0852	Yes	2	32	199.333	-167.333	2	32	0	0	0	0	0	0	0	0	0	4	Winter	2011-08-24	August	6:30	6:37 begin	Night
1327	000	0853	Yes	5	80	199.333	-119.333	0	0	1	3	1	0	0	0	0	0	0	0	Winter	2011-08-24	August	7:00		Dawn
1328	000	0854	Yes	8	128	199.333	-71.3333	2	32	2	0	3	0	0	0	0	0	1	3	Winter	2011-08-24	August	7:30		Dawn
1329	000	0855	No	0	0	199.333	-199.333	0	0	0	0	0	0	0	0	0	0	0	1	Winter	2011-08-24	August	8:00	7:49 rise	Morning
1330	000	0856	No	0	0	199.333	-199.333	0	0	0	0	0	0	0	0	0	0	0	2	Winter	2011-08-24	August	8:30		Morning
1331	000	0857	Yes	1	16	199.333	-183.333	1	16	0	0	0	0	0	0	0	0	0	2	Winter	2011-08-24	August	9:00		Morning
1332	000	0858	Yes	2	32	199.333	-167.333	2	32	0	0	0	0	0	0	0	0	0	2	Winter	2011-08-24	August	9:30		Morning
1333	000	0859	Yes	3	48	199.333	-151.333	1	16	0	0	1	0	0	0	0	0	1	1	Winter	2011-08-24	August	10:00		Morning
1334	000	0860	No	0	0	199.333	-199.333	0	0	0	0	0	0	0	0	0	0	0	0	Winter	2011-08-24	August	10:30		Morning
1335	000	0861	Yes	3	48	199.333	-151.333	1	16	0	0	1	0	0	0	1	0	0	1	Winter	2011-08-24	August	11:00		Morning
1336	000	0862	Yes	8	128	199.333	-71.3333	0	0	0	1	2	0	1	1	1	0	2	1	Winter	2011-08-24	August	11:30		Morning
1337	000	0863	Yes	14	224	199.333	24.6667	8	128	0	0	3	0	2	0	1	0	0	9	Winter	2011-08-24	August	12:00		Morning
1338	000	0864	Yes	13	208	199.333	8.66667	11	176	0	0	0	0	0	0	0	0	2	9	Winter	2011-08-24	August	12:30		Morning
1339	000	0865	Yes	30	480	199.333	280.667	13	208	0	1	5	0	4	1	2	1	3	14	Winter	2011-08-24	August	13:00	12:58 transit	Afternoon
1340	000	0866	Yes	8	128	199.333	-71.3333	1	16	1	0	1	0	4	1	0	0	0	2	Winter	2011-08-24	August	13:30		Afternoon
1341	000	0867	Yes	36	576	199.333	376.667	4	64	0	0	5	0	10	6	1	0	10	9	Winter	2011-08-24	August	14:00		Afternoon
1342	000	0868	Yes	21	336	199.333	136.667	16	256	1	0	0	1	1	0	0	0	2	18	Winter	2011-08-24	August	14:30		Afternoon
1343	000	0869	Yes	31	496	199.333	296.667	5	80	0	5	2	0	2	3	4	0	10	5	Winter	2011-08-24	August	15:00		Afternoon
1344	000	0870	Yes	20	320	199.333	120.667	0	0	0	6	4	0	4	3	2	0	1	4	Winter	2011-08-24	August	15:30		Afternoon
1345	000	0871	Yes	22	352	199.333	152.667	2	32	1	13	0	0	0	0	0	0	6	1	Winter	2011-08-24	August	16:00		Afternoon
1346	000	0872	Yes	23	368	199.333	168.667	12	192	0	0	3	0	2	0	0	0	6	15	Winter	2011-08-24	August	16:30		Afternoon
1347	000	0873	Yes	27	432	199.333	232.667	9	144	1	1	5	0	4	0	0	0	7	16	Winter	2011-08-24	August	17:00		Afternoon
1348	000	0874	Yes	11	176	199.333	-23.3333	2	32	1	1	0	0	2	0	3	0	2	3	Winter	2011-08-24	August	17:30		Afternoon
1349	000	0875	Yes	13	208	199.333	8.66667	0	0	0	1	5	1	6	0	0	0	0	2	Winter	2011-08-24	August	18:00	18:07 set	Afternoon
1350	000	0876	Yes	26	416	199.333	216.667	12	192	3	1	6	0	1	0	0	0	3	17	Winter	2011-08-24	August	18:30		Dusk
1351	000	0877	Yes	31	496	199.333	296.667	14	224	2	6	3	0	3	0	3	0	0	17	Winter	2011-08-24	August	19:00		Dusk
1352	000	0878	Yes	18	288	199.333	88.6667	10	160	2	0	4	0	0	0	0	0	2	19	Winter	2011-08-24	August	19:30	19:19 end	Night
1353	000	0879	Yes	26	416	199.333	216.667	13	208	1	6	0	0	6	0	0	0	0	14	Winter	2011-08-24	August	20:00		Night
1354	000	0880	Yes	26	416	199.333	216.667	6	96	0	1	8	0	5	4	0	1	1	10	Winter	2011-08-24	August	20:30		Night
1355	000	0881	Yes	11	176	199.333	-23.3333	5	80	2	0	1	0	2	1	0	0	0	8	Winter	2011-08-24	August	21:00		Night
1356	000	0882	Yes	7	112	199.333	-87.3333	4	64	0	0	2	0	0	0	1	0	0	6	Winter	2011-08-24	August	21:30		Night
1357	000	0883	Yes	18	288	199.333	88.6667	13	208	0	0	2	0	0	3	0	0	0	17	Winter	2011-08-24	August	22:00		Night
1358	000	0884	Yes	17	272	199.333	72.6667	0	0	0	2	4	0	4	6	0	1	0	8	Winter	2011-08-24	August	22:30		Night
1359	000	0885	Yes	17	272	199.333	72.6667	16	256	0	0	0	0	1	0	0	0	0	15	Winter	2011-08-24	August	23:00		Night
1360	000	0886	Yes	13	208	199.333	8.66667	5	80	2	0	2	0	3	0	1	0	0	11	Winter	2011-08-24	August	23:30		Night
1361	000	0887	Yes	5	80	72	8	0	0	0	0	3	0	0	0	0	0	2	5	Winter	2011-08-25	August	0:00		Night
1362	000	0888	Yes	4	64	72	-8	0	0	0	0	2	0	2	0	0	0	0	5	Winter	2011-08-25	August	0:30		Night
1363	000	0889	Yes	12	192	72	120	10	160	0	0	2	0	0	0	0	0	0	20	Winter	2011-08-25	August	1:00		Night
1364	000	0890	Yes	3	48	72	-24	1	16	0	0	1	0	0	0	1	0	0	2	Winter	2011-08-25	August	1:30		Night
1365	000	0891	Yes	4	64	72	-8	0	0	2	1	1	0	0	0	0	0	0	3	Winter	2011-08-25	August	2:00		Night
1366	000	0892	Yes	3	48	72	-24	0	0	0	1	2	0	0	0	0	0	0	3	Winter	2011-08-25	August	2:30		Night
1367	000	0893	Yes	10	160	72	88	7	112	0	0	3	0	0	0	0	0	0	9	Winter	2011-08-25	August	3:00		Night
1368	000	0894	Yes	13	208	72	136	8	128	0	0	4	0	1	0	0	0	0	13	Winter	2011-08-25	August	3:30		Night
1369	000	0895	Yes	24	384	72	312	19	304	0	3	1	0	1	0	0	0	0	17	Winter	2011-08-25	August	4:00		Night
1370	000	0896	Yes	19	304	72	232	0	0	0	2	13	0	3	0	1	0	0	6	Winter	2011-08-25	August	4:30		Night
1371	000	0897	Yes	23	368	72	296	2	32	0	1	16	0	4	0	0	0	0	7	Winter	2011-08-25	August	5:00		Night
1372	000	0898	Yes	3	48	72	-24	2	32	0	1	0	0	0	0	0	0	0	5	Winter	2011-08-25	August	5:30		Night
1373	000	0899	Yes	4	64	72	-8	4	64	0	0	0	0	0	0	0	0	0	8	Winter	2011-08-25	August	6:00		Night
1374	000	0900	Yes	4	64	72	-8	0	0	0	1	0	0	3	0	0	0	0	1	Winter	2011-08-25	August	6:30	6:35 begin	Night
1375	000	0901	Yes	9	144	72	72	0	0	0	0	2	0	3	0	4	0	0	3	Winter	2011-08-25	August	7:00		Dawn
1376	000	0902	Yes	13	208	72	136	1	16	0	0	0	0	0	2	4	2	4	3	Winter	2011-08-25	August	7:30		Dawn
1377	000	0903	Yes	5	80	72	8	1	16	0	0	2	0	2	0	0	0	0	6	Winter	2011-08-25	August	8:00	7:47 rise	Morning
1378	000	0904	Yes	4	64	72	-8	2	32	0	0	2	0	0	0	0	0	0	4	Winter	2011-08-25	August	8:30		Morning
1379	000	0905	Yes	9	144	72	72	6	96	0	1	0	0	2	0	0	0	0	6	Winter	2011-08-25	August	9:00		Morning
1380	000	0906	Yes	10	160	72	88	0	0	1	1	2	0	0	0	1	0	5	2	Winter	2011-08-25	August	9:30		Morning
1381	000	0907	Yes	8	128	72	56	0	0	0	0	1	1	0	1	0	0	5	1	Winter	2011-08-25	August	10:00		Morning
1382	000	0908	Yes	8	128	72	56	2	32	0	3	0	0	2	1	0	0	0	6	Winter	2011-08-25	August	10:30		Morning
1383	000	0909	Yes	7	112	72	40	2	32	0	0	3	0	0	0	2	0	0	4	Winter	2011-08-25	August	11:00		Morning
1384	000	0910	Yes	2	32	72	-40	1	16	0	0	1	0	0	0	0	0	0	2	Winter	2011-08-25	August	11:30		Morning
1385	000	0911	Yes	26	416	72	344	0	0	0	7	7	0	5	0	0	1	6	4	Winter	2011-08-25	August	12:00		Morning
1386	000	0912	Yes	1	16	72	-56	0	0	0	0	1	0	0	0	0	0	0	4	Winter	2011-08-25	August	12:30		Morning
1387	000	0913	Yes	2	32	72	-40	2	32	0	0	0	0	0	0	0	0	0	2	Winter	2011-08-25	August	13:00	12:57 transit	Afternoon
1388	000	0914	No	0	0	72	-72	0	0	0	0	0	0	0	0	0	0	0	0	Winter	2011-08-25	August	13:30		Afternoon
1389	000	0915	Yes	3	48	72	-24	0	0	0	0	0	0	3	0	0	0	0	0	Winter	2011-08-25	August	14:00		Afternoon
1390	000	0916	No	0	0	72	-72	0	0	0	0	0	0	0	0	0	0	0	0	Winter	2011-08-25	August	14:30		Afternoon
1391	000	0917	Yes	4	64	72	-8	3	48	0	0	1	0	0	0	0	0	0	3	Winter	2011-08-25	August	15:00		Afternoon
1392	000	0918	No	0	0	72	-72	0	0	0	0	0	0	0	0	0	0	0	2	Winter	2011-08-25	August	15:30		Afternoon
1393	000	0919	Yes	19	304	72	232	1	16	0	10	6	0	0	0	1	0	1	4	Winter	2011-08-25	August	16:00		Afternoon
1394	000	0920	No	1	16	72	-56	1	16	0	0	0	0	0	0	0	0	0	2	Winter	2011-08-25	August	16:30		Afternoon
1395	000	0921	Yes	12	192	72	120	7	112	1	0	1	0	3	0	0	0	0	10	Winter	2011-08-25	August	17:00		Afternoon
1396	000	0922	Yes	14	224	72	152	10	160	1	0	3	0	0	0	0	0	0	10	Winter	2011-08-25	August	17:30		Afternoon
1397	000	0923	Yes	3	48	72	-24	2	32	0	0	0	0	0	0	1	0	0	3	Winter	2011-08-25	August	18:00	18:09 set	Afternoon
1398	000	0924	Yes	3	48	72	-24	2	32	0	1	0	0	0	0	0	0	0	9	Winter	2011-08-25	August	18:30		Dusk
1399	000	0925	Yes	7	112	72	40	0	0	2	0	2	1	1	0	1	0	0	3	Winter	2011-08-25	August	19:00		Dusk
1400	000	0926	Yes	13	208	72	136	0	0	0	0	8	0	4	0	1	0	0	7	Winter	2011-08-25	August	19:30	19:20 end	Night
1401	000	0927	Yes	18	288	72	216	5	80	0	0	2	5	4	0	2	0	0	6	Winter	2011-08-25	August	20:00		Night
1402	000	0928	Yes	6	96	72	24	4	64	2	0	0	0	0	0	0	0	0	4	Winter	2011-08-25	August	20:30		Night
1403	000	0929	Yes	1	16	72	-56	0	0	0	0	0	0	0	0	0	0	1	3	Winter	2011-08-25	August	21:00		Night
1404	000	0930	Yes	3	48	72	-24	0	0	0	0	0	0	3	0	0	0	0	2	Winter	2011-08-25	August	21:30		Night
1405	000	0931	No	0	0	72	-72	0	0	0	0	0	0	0	0	0	0	0	1	Winter	2011-08-25	August	22:00		Night
1406	000	0932	Yes	1	16	72	-56	1	16	0	0	0	0	0	0	0	0	0	2	Winter	2011-08-25	August	22:30		Night
1407	000	0933	No	0	0	72	-72	0	0	0	0	0	0	0	0	0	0	0	0	Winter	2011-08-25	August	23:00		Night
1408	000	0934	Yes	21	336	72	264	7	112	0	0	5	0	3	0	6	0	0	20	Winter	2011-08-25	August	23:30		Night
1409	000	0935	Yes	5	80	299.333	-219.333	1	16	0	3	0	0	0	0	0	0	1	5	Winter	2011-08-26	August	0:00		Night
1410	000	0936	Yes	18	288	299.333	-11.3333	8	128	0	0	5	0	2	0	0	0	3	10	Winter	2011-08-26	August	0:30		Night
1411	000	0937	Yes	11	176	299.333	-123.333	0	0	0	1	0	0	0	0	0	0	10	2	Winter	2011-08-26	August	1:00		Night
1412	000	0938	Yes	10	160	299.333	-139.333	5	80	0	0	0	1	0	1	0	1	2	8	Winter	2011-08-26	August	1:30		Night
1413	000	0939	Yes	18	288	299.333	-11.3333	15	240	0	0	1	0	2	0	0	0	0	20	Winter	2011-08-26	August	2:00		Night
1414	000	0940	Yes	3	48	299.333	-251.333	2	32	0	0	1	0	0	0	0	0	0	6	Winter	2011-08-26	August	2:30		Night
1415	000	0941	Yes	8	128	299.333	-171.333	6	96	0	0	2	0	0	0	0	0	0	6	Winter	2011-08-26	August	3:00		Night
1416	000	0942	No	0	0	299.333	-299.333	0	0	0	0	0	0	0	0	0	0	0	2	Winter	2011-08-26	August	3:30		Night
1417	000	0943	Yes	6	96	299.333	-203.333	4	64	0	0	0	2	0	0	0	0	0	7	Winter	2011-08-26	August	4:00		Night
1418	000	0944	Yes	9	144	299.333	-155.333	7	112	1	1	0	0	0	0	0	0	0	10	Winter	2011-08-26	August	4:30		Night
1419	000	0945	Yes	22	352	299.333	52.6667	2	32	0	0	6	0	9	3	0	0	2	4	Winter	2011-08-26	August	5:00		Night
1420	000	0946	Yes	13	208	299.333	-91.3333	1	16	0	1	0	0	4	0	3	0	4	2	Winter	2011-08-26	August	5:30		Night
1421	000	0947	Yes	4	64	299.333	-235.333	1	16	2	0	1	0	0	0	0	0	0	2	Winter	2011-08-26	August	6:00		Night
1422	000	0948	Yes	10	160	299.333	-139.333	0	0	0	7	1	0	2	0	0	0	0	1	Winter	2011-08-26	August	6:30	6:33 begin	Night
1423	000	0949	Yes	18	288	299.333	-11.3333	0	0	0	4	2	0	4	0	6	0	2	4	Winter	2011-08-26	August	7:00		Dawn
1424	000	0950	Yes	17	272	299.333	-27.3333	7	112	0	0	0	0	2	0	0	0	8	8	Winter	2011-08-26	August	7:30	7:44 rise	Dawn
1425	000	0951	Yes	2	32	299.333	-267.333	1	16	0	1	0	0	0	0	0	0	0	3	Winter	2011-08-26	August	8:00		Morning
1426	000	0952	Yes	5	80	299.333	-219.333	0	0	0	0	0	0	5	0	0	0	0	1	Winter	2011-08-26	August	8:30		Morning
1427	000	0953	Yes	3	48	299.333	-251.333	0	0	2	1	0	0	0	0	0	0	0	0	Winter	2011-08-26	August	9:00		Morning
1428	000	0954	Yes	5	80	299.333	-219.333	2	32	0	0	1	1	0	0	1	0	0	3	Winter	2011-08-26	August	9:30		Morning
1429	000	0955	Yes	46	736	299.333	436.667	1	16	3	1	28	1	7	2	3	0	0	8	Winter	2011-08-26	August	10:00		Morning
1430	000	0956	Yes	32	512	299.333	212.667	4	64	2	1	7	0	9	2	2	0	5	2	Winter	2011-08-26	August	10:30		Morning
1431	000	0957	Yes	21	336	299.333	36.6667	6	96	0	3	0	0	1	2	2	0	7	5	Winter	2011-08-26	August	11:00		Morning
1432	000	0958	Yes	11	176	299.333	-123.333	8	128	0	0	1	0	0	0	0	1	1	18	Winter	2011-08-26	August	11:30		Morning
1433	000	0959	Yes	18	288	299.333	-11.3333	5	80	0	1	5	0	0	0	5	0	2	7	Winter	2011-08-26	August	12:00		Morning
1434	000	0960	Yes	21	336	299.333	36.6667	14	224	0	0	2	0	5	0	0	0	0	19	Winter	2011-08-26	August	12:30		Morning
1435	000	0961	Yes	28	448	299.333	148.667	12	192	0	0	0	0	4	11	1	0	0	18	Winter	2011-08-26	August	13:00	12:57 transit	Afternoon
1436	000	0962	Yes	13	208	299.333	-91.3333	2	32	0	0	0	0	1	5	5	0	0	7	Winter	2011-08-26	August	13:30		Afternoon
1437	000	0963	Yes	21	336	299.333	36.6667	4	64	1	1	5	0	3	1	0	1	5	6	Winter	2011-08-26	August	14:00		Afternoon
1438	000	0964	Yes	25	400	299.333	100.667	1	16	0	0	17	0	2	0	0	0	5	1	Winter	2011-08-26	August	14:30		Afternoon
1439	000	0965	Yes	23	368	299.333	68.6667	8	128	1	2	4	0	2	1	2	2	1	10	Winter	2011-08-26	August	15:00		Afternoon
1440	000	0966	Yes	25	400	299.333	100.667	23	368	0	0	0	0	0	0	2	0	0	26	Winter	2011-08-26	August	15:30		Afternoon
1441	000	0967	Yes	18	288	299.333	-11.3333	5	80	2	0	7	0	1	0	0	0	3	10	Winter	2011-08-26	August	16:00		Afternoon
1442	000	0968	Yes	67	1072	299.333	772.667	1	16	1	4	26	0	20	7	2	1	5	9	Winter	2011-08-26	August	16:30		Afternoon
1443	000	0969	Yes	20	320	299.333	20.6667	7	112	0	1	2	0	4	0	0	2	4	9	Winter	2011-08-26	August	17:00		Afternoon
1444	000	0970	Yes	15	240	299.333	-59.3333	3	48	0	0	2	0	8	2	0	0	0	5	Winter	2011-08-26	August	17:30		Afternoon
1445	000	0971	Yes	10	160	299.333	-139.333	2	32	0	3	1	0	4	0	0	0	0	8	Winter	2011-08-26	August	18:00	18:10 set	Afternoon
1446	000	0972	Yes	42	672	299.333	372.667	4	64	0	1	6	0	23	5	0	0	3	7	Winter	2011-08-26	August	18:30		Dusk
1447	000	0973	Yes	17	272	299.333	-27.3333	4	64	2	1	5	0	3	2	0	0	0	5	Winter	2011-08-26	August	19:00		Dusk
1448	000	0974	Yes	29	464	299.333	164.667	9	144	0	6	6	0	8	0	0	0	0	8	Winter	2011-08-26	August	19:30	19:22 end	Night
1449	000	0975	Yes	30	480	299.333	180.667	5	80	1	2	3	0	9	2	7	1	0	9	Winter	2011-08-26	August	20:00		Night
1450	000	0976	Yes	32	512	299.333	212.667	13	208	1	0	5	0	6	1	6	0	0	26	Winter	2011-08-26	August	20:30		Night
1451	000	0977	Yes	34	544	299.333	244.667	8	128	0	0	7	0	9	6	4	0	0	21	Winter	2011-08-26	August	21:00		Night
1452	000	0978	Yes	38	608	299.333	308.667	13	208	0	0	9	0	12	1	1	1	1	10	Winter	2011-08-26	August	21:30		Night
1453	000	0979	Yes	42	672	299.333	372.667	13	208	1	7	13	0	6	2	0	0	0	18	Winter	2011-08-26	August	22:00		Night
1454	000	0980	Yes	17	272	299.333	-27.3333	0	0	0	1	7	0	5	3	1	0	0	10	Winter	2011-08-26	August	22:30		Night
1455	000	0981	Yes	6	96	299.333	-203.333	2	32	0	0	2	0	1	0	0	0	0	8	Winter	2011-08-26	August	23:00		Night
1456	000	0982	Yes	10	160	299.333	-139.333	3	48	0	0	0	0	3	0	3	0	1	8	Winter	2011-08-26	August	23:30		Night
1457	000	0983	Yes	7	112	263.667	-151.667	0	0	0	0	5	0	7	0	0	0	0	1	Winter	2011-08-27	August	0:00		Night
1458	000	0984	Yes	1	16	263.667	-247.667	0	0	0	0	0	0	0	1	0	0	0	0	Winter	2011-08-27	August	0:30		Night
1459	000	0985	Yes	3	48	263.667	-215.667	0	0	0	0	1	0	1	0	0	0	0	3	Winter	2011-08-27	August	1:00		Night
1460	000	0986	Yes	23	368	263.667	104.333	1	16	0	2	7	0	13	0	0	0	0	5	Winter	2011-08-27	August	1:30		Night
1461	000	0987	Yes	16	256	263.667	-7.66667	1	16	0	2	6	0	4	0	0	0	3	5	Winter	2011-08-27	August	2:00		Night
1462	000	0988	Yes	9	144	263.667	-119.667	0	0	0	0	7	0	1	1	0	0	0	3	Winter	2011-08-27	August	2:30		Night
1463	000	0989	Yes	4	64	263.667	-199.667	0	0	0	0	2	0	1	1	0	0	0	7	Winter	2011-08-27	August	3:00		Night
1464	000	0990	Yes	5	80	263.667	-183.667	1	16	0	0	1	0	3	0	0	0	0	9	Winter	2011-08-27	August	3:30		Night
1465	000	0991	Yes	15	240	263.667	-23.6667	6	96	0	0	2	0	7	0	0	0	0	6	Winter	2011-08-27	August	4:00		Night
1466	000	0992	Yes	11	176	263.667	-87.6667	2	32	0	0	0	0	6	0	3	0	0	4	Winter	2011-08-27	August	4:30		Night
1467	000	0993	Yes	14	224	263.667	-39.6667	2	32	3	2	2	0	1	0	4	0	0	8	Winter	2011-08-27	August	5:00		Night
1468	000	0994	Yes	7	112	263.667	-151.667	3	48	0	0	0	0	2	0	2	0	0	5	Winter	2011-08-27	August	5:30		Night
1469	000	0995	Yes	16	256	263.667	-7.66667	3	48	0	2	3	0	4	0	4	0	0	6	Winter	2011-08-27	August	6:00		Night
1470	000	0996	Yes	17	272	263.667	8.33333	2	32	0	0	2	0	1	8	1	0	3	3	Winter	2011-08-27	August	6:30	6:31 begin	Dawn
1471	000	0997	Yes	29	464	263.667	200.333	5	80	1	2	4	0	11	8	2	0	1	17	Winter	2011-08-27	August	7:00		Dawn
1472	000	0998	Yes	16	256	263.667	-7.66667	1	16	0	1	5	0	5	0	3	0	1	8	Winter	2011-08-27	August	7:30	7:42 rise	Dawn
1473	000	0999	Yes	22	352	263.667	88.3333	1	16	1	0	0	0	7	9	2	0	2	1	Winter	2011-08-27	August	8:00		Morning
1474	000	1000	Yes	8	128	263.667	-135.667	3	48	0	0	0	0	3	0	0	0	2	0	Winter	2011-08-27	August	8:30		Morning
1475	000	1001	Yes	1	16	263.667	-247.667	0	0	0	0	0	0	0	0	0	0	1	1	Winter	2011-08-27	August	9:00		Morning
1476	000	1002	Yes	40	640	263.667	376.333	4	64	2	1	14	0	13	1	3	0	2	2	Winter	2011-08-27	August	9:30		Morning
1477	000	1003	Yes	16	256	263.667	-7.66667	2	32	0	1	2	0	2	0	5	0	4	0	Winter	2011-08-27	August	10:00		Morning
1478	000	1004	Yes	8	128	263.667	-135.667	0	0	0	1	2	0	3	0	1	0	1	0	Winter	2011-08-27	August	10:30		Morning
1479	000	1005	Yes	15	240	263.667	-23.6667	2	32	0	12	1	0	0	0	0	0	0	0	Winter	2011-08-27	August	11:00		Morning
1480	000	1006	Yes	5	80	263.667	-183.667	0	0	0	3	0	0	0	0	0	0	2	0	Winter	2011-08-27	August	11:30		Morning
1481	000	1007	Yes	11	176	263.667	-87.6667	1	16	0	0	1	0	3	0	0	0	6	1	Winter	2011-08-27	August	12:00		Morning
1482	000	1008	Yes	9	144	263.667	-119.667	0	0	1	3	0	0	3	0	0	0	2	5	Winter	2011-08-27	August	12:30		Morning
1483	000	1009	Yes	15	240	263.667	-23.6667	0	0	0	0	5	0	1	4	0	4	1	4	Winter	2011-08-27	August	13:00	12:57 transit	Afternoon
1484	000	1010	Yes	6	96	263.667	-167.667	0	0	0	6	0	0	2	0	0	0	0	1	Winter	2011-08-27	August	13:30		Afternoon
1485	000	1011	Yes	6	96	263.667	-167.667	2	32	0	0	4	0	2	0	0	0	0	7	Winter	2011-08-27	August	14:00		Afternoon
1486	000	1012	Yes	20	320	263.667	56.3333	16	256	0	0	0	0	2	0	2	0	0	19	Winter	2011-08-27	August	14:30		Afternoon
1487	000	1013	Yes	17	272	263.667	8.33333	0	0	4	0	5	0	2	2	0	0	4	13	Winter	2011-08-27	August	15:00		Afternoon
1488	000	1014	Yes	16	256	263.667	-7.66667	1	16	0	2	3	0	3	1	2	0	4	2	Winter	2011-08-27	August	15:30		Afternoon
1489	000	1015	Yes	20	320	263.667	56.3333	3	48	1	10	3	0	1	0	0	0	2	12	Winter	2011-08-27	August	16:00		Afternoon
1490	000	1016	Yes	30	480	263.667	216.333	3	48	2	0	12	0	7	4	2	0	0	7	Winter	2011-08-27	August	16:30		Afternoon
1491	000	1017	Yes	13	208	263.667	-55.6667	2	32	0	4	2	0	1	0	3	0	1	4	Winter	2011-08-27	August	17:00		Afternoon
1492	000	1018	Yes	18	288	263.667	24.3333	7	112	1	0	6	0	4	0	0	0	0	9	Winter	2011-08-27	August	17:30		Afternoon
1493	000	1019	Yes	28	448	263.667	184.333	4	64	3	8	6	0	3	0	0	0	4	12	Winter	2011-08-27	August	18:00	18:12 set	Afternoon
1494	000	1020	Yes	17	272	263.667	8.33333	5	80	0	1	2	0	3	2	0	0	4	9	Winter	2011-08-27	August	18:30		Dusk
1495	000	1021	Yes	33	528	263.667	264.333	1	16	3	0	12	0	6	0	1	1	9	8	Winter	2011-08-27	August	19:00		Dusk
1496	000	1022	Yes	27	432	263.667	168.333	7	112	5	1	7	0	4	0	0	0	3	9	Winter	2011-08-27	August	19:30	19:23 end	Night
1497	000	1023	Yes	15	240	263.667	-23.6667	5	80	0	0	4	0	1	0	0	3	2	7	Winter	2011-08-27	August	20:00		Night
1498	000	1024	Yes	27	432	263.667	168.333	7	112	0	5	3	0	5	3	1	0	3	10	Winter	2011-08-27	August	20:30		Night
1499	000	1025	Yes	17	272	263.667	8.33333	4	64	1	4	0	0	4	0	2	0	2	12	Winter	2011-08-27	August	21:00		Night
1500	000	1026	Yes	1	16	263.667	-247.667	1	16	0	0	0	0	0	0	0	0	0	5	Winter	2011-08-27	August	21:30		Night
1501	000	1027	Yes	46	736	263.667	472.333	9	144	1	2	8	0	12	0	3	0	11	14	Winter	2011-08-27	August	22:00		Night
1502	000	1028	Yes	44	704	263.667	440.333	14	224	2	1	12	0	7	0	0	0	3	16	Winter	2011-08-27	August	22:30		Night
1503	000	1029	Yes	20	320	263.667	56.3333	6	96	1	0	8	0	4	0	0	0	1	18	Winter	2011-08-27	August	23:00		Night
1504	000	1030	Yes	27	432	263.667	168.333	7	112	0	0	9	0	8	0	0	0	3	16	Winter	2011-08-27	August	23:30		Night
1505	000	1031	Yes	15	240	100.667	139.333	9	144	0	0	4	0	2	0	0	0	0	19	Winter	2011-08-28	August	0:00		Night
1506	000	1032	Yes	11	176	100.667	75.3333	6	96	0	0	4	0	1	0	0	0	0	8	Winter	2011-08-28	August	0:30		Night
1507	000	1033	Yes	9	144	100.667	43.3333	0	0	0	0	0	0	7	0	0	0	2	1	Winter	2011-08-28	August	1:00		Night
1508	000	1034	Yes	13	208	100.667	107.333	1	16	1	0	5	0	6	0	0	0	0	7	Winter	2011-08-28	August	1:30		Night
1509	000	1035	Yes	6	96	100.667	-4.66667	0	0	0	0	4	0	2	0	0	0	0	2	Winter	2011-08-28	August	2:00		Night
1510	000	1036	Yes	4	64	100.667	-36.6667	4	64	0	0	0	0	0	0	0	0	0	4	Winter	2011-08-28	August	2:30		Night
1511	000	1037	Yes	3	48	100.667	-52.6667	0	0	0	0	1	0	1	0	1	0	0	2	Winter	2011-08-28	August	3:00		Night
1512	000	1038	Yes	3	48	100.667	-52.6667	0	0	0	0	0	0	3	0	0	0	0	0	Winter	2011-08-28	August	3:30		Night
1513	000	1039	Yes	10	160	100.667	59.3333	1	16	0	0	1	0	7	0	0	0	1	6	Winter	2011-08-28	August	4:00		Night
1514	000	1040	Yes	10	160	100.667	59.3333	2	32	0	1	4	0	2	0	0	0	1	5	Winter	2011-08-28	August	4:30		Night
1515	000	1041	Yes	4	64	100.667	-36.6667	4	64	0	0	0	0	0	0	0	0	0	5	Winter	2011-08-28	August	5:00		Night
1516	000	1042	Yes	4	64	100.667	-36.6667	0	0	0	0	0	0	4	0	0	0	0	1	Winter	2011-08-28	August	5:30		Night
1517	000	1043	No	0	0	100.667	-100.667	0	0	0	0	0	0	0	0	0	0	0	1	Winter	2011-08-28	August	6:00		Night
1518	000	1044	Yes	6	96	100.667	-4.66667	0	0	0	6	0	0	0	0	0	0	0	2	Winter	2011-08-28	August	6:30	6:29 begin	Dawn
1519	000	1045	Yes	4	64	100.667	-36.6667	1	16	0	0	3	0	0	0	0	0	0	3	Winter	2011-08-28	August	7:00		Dawn
1520	000	1046	No	0	0	100.667	-100.667	0	0	0	0	0	0	0	0	0	0	0	0	Winter	2011-08-28	August	7:30	7:40 rise	Morning
1521	000	1047	No	0	0	100.667	-100.667	0	0	0	0	0	0	0	0	0	0	0	0	Winter	2011-08-28	August	8:00		Morning
1522	000	1048	No	0	0	100.667	-100.667	0	0	0	0	0	0	0	0	0	0	0	1	Winter	2011-08-28	August	8:30		Morning
1523	000	1049	No	0	0	100.667	-100.667	0	0	0	0	0	0	0	0	0	0	0	0	Winter	2011-08-28	August	9:00		Morning
1524	000	1050	No	0	0	100.667	-100.667	0	0	0	0	0	0	0	0	0	0	0	3	Winter	2011-08-28	August	9:30		Morning
1525	000	1051	No	0	0	100.667	-100.667	0	0	0	0	0	0	0	0	0	0	0	0	Winter	2011-08-28	August	10:00		Morning
1526	000	1052	Yes	2	32	100.667	-68.6667	1	16	0	0	0	0	0	0	0	0	1	1	Winter	2011-08-28	August	10:30		Morning
1527	000	1053	Yes	7	112	100.667	11.3333	0	0	0	0	1	0	6	0	0	0	0	0	Winter	2011-08-28	August	11:00		Morning
1528	000	1054	No	0	0	100.667	-100.667	0	0	0	0	0	0	0	0	0	0	0	0	Winter	2011-08-28	August	11:30		Morning
1529	000	1055	Yes	1	16	100.667	-84.6667	1	16	0	0	0	0	0	0	0	0	0	0	Winter	2011-08-28	August	12:00		Morning
1530	000	1056	No	0	0	100.667	-100.667	0	0	0	0	0	0	0	0	0	0	0	2	Winter	2011-08-28	August	12:30		Morning
1531	000	1057	No	0	0	100.667	-100.667	0	0	0	0	0	0	0	0	0	0	0	1	Winter	2011-08-28	August	13:00	12:56 transit	Afternoon
1532	000	1058	Yes	13	208	100.667	107.333	3	48	0	0	2	0	7	0	0	0	1	5	Winter	2011-08-28	August	13:30		Afternoon
1533	000	1059	Yes	1	16	100.667	-84.6667	0	0	0	0	0	0	1	0	0	0	0	1	Winter	2011-08-28	August	14:00		Afternoon
1534	000	1060	Yes	3	48	100.667	-52.6667	0	0	0	0	0	0	3	0	0	0	0	1	Winter	2011-08-28	August	14:30		Afternoon
1535	000	1061	No	0	0	100.667	-100.667	0	0	0	0	0	0	0	0	0	0	0	0	Winter	2011-08-28	August	15:00		Afternoon
1536	000	1062	Yes	5	80	100.667	-20.6667	2	32	0	0	3	0	0	0	0	0	0	2	Winter	2011-08-28	August	15:30		Afternoon
1537	000	1063	Yes	4	64	100.667	-36.6667	0	0	0	0	0	0	2	0	0	0	2	1	Winter	2011-08-28	August	16:00		Afternoon
1538	000	1064	Yes	29	464	100.667	363.333	8	128	0	0	19	0	7	0	0	0	0	22	Winter	2011-08-28	August	16:30		Afternoon
1539	000	1065	Yes	1	16	100.667	-84.6667	0	0	0	0	1	0	0	0	0	0	0	1	Winter	2011-08-28	August	17:00		Afternoon
1540	000	1066	Yes	3	48	100.667	-52.6667	0	0	0	0	3	0	0	0	0	0	0	2	Winter	2011-08-28	August	17:30		Afternoon
1541	000	1067	Yes	10	160	100.667	59.3333	1	16	0	1	2	0	4	0	0	0	2	3	Winter	2011-08-28	August	18:00	18:13 set	Afternoon
1542	000	1068	Yes	18	288	100.667	187.333	7	112	0	0	4	0	5	1	0	0	1	7	Winter	2011-08-28	August	18:30		Dusk
1543	000	1069	Yes	12	192	100.667	91.3333	0	0	0	0	2	0	3	2	1	0	4	5	Winter	2011-08-28	August	19:00		Dusk
1544	000	1070	Yes	7	112	100.667	11.3333	4	64	0	0	1	0	2	0	0	0	0	9	Winter	2011-08-28	August	19:30	19:24 end	Night
1545	000	1071	Yes	25	400	100.667	299.333	9	144	0	8	4	0	4	0	0	0	0	11	Winter	2011-08-28	August	20:00		Night
1546	000	1072	Yes	6	96	100.667	-4.66667	0	0	0	0	5	0	0	1	0	0	0	2	Winter	2011-08-28	August	20:30		Night
1547	000	1073	Yes	12	192	100.667	91.3333	5	80	0	2	1	0	1	1	0	0	2	7	Winter	2011-08-28	August	21:00		Night
1548	000	1074	Yes	8	128	100.667	27.3333	5	80	0	0	2	0	1	0	0	0	0	7	Winter	2011-08-28	August	21:30		Night
1549	000	1075	Yes	5	80	100.667	-20.6667	3	48	0	0	0	0	2	0	0	0	0	3	Winter	2011-08-28	August	22:00		Night
1550	000	1076	Yes	13	208	100.667	107.333	6	96	1	2	4	0	0	0	0	0	0	6	Winter	2011-08-28	August	22:30		Night
1551	000	1077	Yes	10	160	100.667	59.3333	0	0	0	1	2	0	1	1	1	0	4	7	Winter	2011-08-28	August	23:00		Night
1552	000	1078	Yes	5	80	100.667	-20.6667	1	16	0	2	1	0	0	0	0	0	0	3	Winter	2011-08-28	August	23:30		Night
1553	000	1079	Yes	4	64	219.333	-155.333	0	0	0	0	1	0	3	0	0	0	0	2	Winter	2011-08-29	August	0:00		Night
1554	000	1080	Yes	17	272	219.333	52.6667	0	0	0	0	13	0	4	0	0	0	0	1	Winter	2011-08-29	August	0:30		Night
1555	000	1081	Yes	13	208	219.333	-11.3333	10	160	0	1	1	0	1	0	0	0	0	11	Winter	2011-08-29	August	1:00		Night
1556	000	1082	Yes	18	288	219.333	68.6667	5	80	1	0	9	0	3	0	0	0	0	12	Winter	2011-08-29	August	1:30		Night
1557	000	1083	Yes	9	144	219.333	-75.3333	6	96	0	0	3	0	0	0	0	0	0	6	Winter	2011-08-29	August	2:00		Night
1558	000	1084	No	0	0	219.333	-219.333	0	0	0	0	0	0	0	0	0	0	0	1	Winter	2011-08-29	August	2:30		Night
1559	000	1085	Yes	25	400	219.333	180.667	7	112	1	0	7	0	4	2	1	1	2	12	Winter	2011-08-29	August	3:00		Night
1560	000	1086	Yes	4	64	219.333	-155.333	1	16	0	0	0	0	2	0	0	0	1	1	Winter	2011-08-29	August	3:30		Night
1561	000	1087	Yes	10	160	219.333	-59.3333	1	16	0	2	4	0	2	0	0	0	1	3	Winter	2011-08-29	August	4:00		Night
1562	000	1088	Yes	15	240	219.333	20.6667	7	112	0	0	2	0	6	0	0	0	0	10	Winter	2011-08-29	August	4:30		Night
1563	000	1089	Yes	3	48	219.333	-171.333	3	48	0	0	0	0	0	0	0	0	0	4	Winter	2011-08-29	August	5:00		Night
1564	000	1090	No	0	0	219.333	-219.333	0	0	0	0	0	0	0	0	0	0	0	2	Winter	2011-08-29	August	5:30		Night
1565	000	1091	Yes	3	48	219.333	-171.333	0	0	0	0	1	0	2	0	0	0	0	5	Winter	2011-08-29	August	6:00		Night
1566	000	1092	No	0	0	219.333	-219.333	0	0	0	0	0	0	0	0	0	0	0	0	Winter	2011-08-29	August	6:30	6:27 begin	Dawn
1567	000	1093	No	0	0	219.333	-219.333	0	0	0	0	0	0	0	0	0	0	0	0	Winter	2011-08-29	August	7:00		Dawn
1568	000	1094	Yes	9	144	219.333	-75.3333	5	80	0	0	4	0	0	0	0	0	0	7	Winter	2011-08-29	August	7:30	7:38 rise	Morning
1569	000	1095	Yes	1	16	219.333	-203.333	0	0	0	0	1	0	0	0	0	0	0	0	Winter	2011-08-29	August	8:00		Morning
1570	000	1096	Yes	1	16	219.333	-203.333	0	0	0	0	1	0	0	0	0	0	0	3	Winter	2011-08-29	August	8:30		Morning
1571	000	1097	Yes	27	432	219.333	212.667	4	64	1	2	4	0	12	1	1	0	2	7	Winter	2011-08-29	August	9:00		Morning
1572	000	1098	Yes	14	224	219.333	4.66667	2	32	0	0	3	0	9	0	0	0	0	2	Winter	2011-08-29	August	9:30		Morning
1573	000	1099	Yes	16	256	219.333	36.6667	1	16	1	1	2	0	5	3	3	0	0	5	Winter	2011-08-29	August	10:00		Morning
1574	000	1100	Yes	2	32	219.333	-187.333	0	0	0	0	2	0	0	0	0	0	0	0	Winter	2011-08-29	August	10:30		Morning
1575	000	1101	Yes	17	272	219.333	52.6667	7	112	0	3	1	0	4	1	0	0	2	10	Winter	2011-08-29	August	11:00		Morning
1576	000	1102	Yes	9	144	219.333	-75.3333	0	0	0	2	3	0	2	0	0	0	2	3	Winter	2011-08-29	August	11:30		Morning
1577	000	1103	Yes	37	592	219.333	372.667	1	16	0	3	10	0	11	7	1	1	3	4	Winter	2011-08-29	August	12:00		Morning
1578	000	1104	Yes	7	112	219.333	-107.333	2	32	0	1	2	0	2	0	0	0	0	5	Winter	2011-08-29	August	12:30		Morning
1579	000	1105	Yes	5	80	219.333	-139.333	0	0	0	0	0	0	4	1	0	0	0	1	Winter	2011-08-29	August	13:00	12:56 transit	Afternoon
1580	000	1106	Yes	12	192	219.333	-27.3333	3	48	0	0	1	0	4	4	0	0	0	5	Winter	2011-08-29	August	13:30		Afternoon
1581	000	1107	Yes	12	192	219.333	-27.3333	0	0	0	0	1	0	8	1	2	0	0	1	Winter	2011-08-29	August	14:00		Afternoon
1582	000	1108	Yes	22	352	219.333	132.667	1	16	0	0	10	0	6	1	3	1	0	8	Winter	2011-08-29	August	14:30		Afternoon
1583	000	1109	Yes	24	384	219.333	164.667	3	48	0	1	2	0	15	3	1	0	0	3	Winter	2011-08-29	August	15:00		Afternoon
1584	000	1110	Yes	10	160	219.333	-59.3333	4	64	0	1	0	0	5	0	0	0	0	7	Winter	2011-08-29	August	15:30		Afternoon
1585	000	1111	Yes	20	320	219.333	100.667	0	0	1	14	0	0	3	1	1	0	0	3	Winter	2011-08-29	August	16:00		Afternoon
1586	000	1112	Yes	9	144	219.333	-75.3333	2	32	0	1	1	0	3	0	2	0	0	5	Winter	2011-08-29	August	16:30		Afternoon
1587	000	1113	Yes	8	128	219.333	-91.3333	1	16	2	0	0	0	5	0	0	0	0	3	Winter	2011-08-29	August	17:00		Afternoon
1588	000	1114	Yes	11	176	219.333	-43.3333	6	96	0	0	2	0	2	0	0	0	1	8	Winter	2011-08-29	August	17:30		Afternoon
1589	000	1115	Yes	9	144	219.333	-75.3333	0	0	0	0	2	0	7	0	0	0	0	4	Winter	2011-08-29	August	18:00	18:15 set	Afternoon
1590	000	1116	Yes	17	272	219.333	52.6667	5	80	0	1	4	0	7	0	0	0	0	6	Winter	2011-08-29	August	18:30		Dusk
1591	000	1117	Yes	13	208	219.333	-11.3333	0	0	0	0	0	0	7	6	0	0	0	3	Winter	2011-08-29	August	19:00		Dusk
1592	000	1118	Yes	28	448	219.333	228.667	7	112	0	9	1	0	5	4	0	0	2	14	Winter	2011-08-29	August	19:30	19:26 end	Night
1593	000	1119	Yes	27	432	219.333	212.667	3	48	0	0	8	0	15	0	0	0	0	10	Winter	2011-08-29	August	20:00		Night
1594	000	1120	Yes	13	208	219.333	-11.3333	3	48	1	0	7	0	2	0	0	0	0	9	Winter	2011-08-29	August	20:30		Night
1595	000	1121	Yes	23	368	219.333	148.667	3	48	0	1	6	0	13	0	0	0	0	6	Winter	2011-08-29	August	21:00		Night
1596	000	1122	Yes	29	464	219.333	244.667	4	64	0	0	8	0	17	0	0	0	0	11	Winter	2011-08-29	August	21:30		Night
1597	000	1123	Yes	31	496	219.333	276.667	1	16	0	1	3	0	12	10	0	0	4	5	Winter	2011-08-29	August	22:00		Night
1598	000	1124	Yes	42	672	219.333	452.667	2	32	1	2	7	0	20	0	0	0	10	1	Winter	2011-08-29	August	22:30		Night
1599	000	1125	Yes	6	96	219.333	-123.333	0	0	0	0	1	0	3	0	0	1	1	1	Winter	2011-08-29	August	23:00		Night
1600	000	1126	Yes	26	416	219.333	196.667	14	224	0	0	7	0	3	0	0	0	2	10	Winter	2011-08-29	August	23:30		Night
1601	000	1127	Yes	18	288	267.333	20.6667	0	0	0	6	7	0	5	0	0	0	0	5	Winter	2011-08-30	August	0:00		Night
1602	000	1128	Yes	38	608	267.333	340.667	15	240	0	0	14	0	7	0	1	0	1	21	Winter	2011-08-30	August	0:30		Night
1603	000	1129	Yes	19	304	267.333	36.6667	13	208	1	0	2	0	1	2	0	0	0	16	Winter	2011-08-30	August	1:00		Night
1604	000	1130	Yes	2	32	267.333	-235.333	1	16	0	0	0	0	0	1	0	0	0	2	Winter	2011-08-30	August	1:30		Night
1605	000	1131	Yes	7	112	267.333	-155.333	3	48	0	0	2	0	2	0	0	0	0	3	Winter	2011-08-30	August	2:00		Night
1606	000	1132	Yes	19	304	267.333	36.6667	1	16	0	0	2	0	5	4	0	0	7	5	Winter	2011-08-30	August	2:30		Night
1607	000	1133	Yes	16	256	267.333	-11.3333	8	128	0	0	0	0	2	4	0	0	2	12	Winter	2011-08-30	August	3:00		Night
1608	000	1134	Yes	8	128	267.333	-139.333	2	32	0	0	5	0	1	0	0	0	0	5	Winter	2011-08-30	August	3:30		Night
1609	000	1135	Yes	11	176	267.333	-91.3333	0	0	0	0	0	0	5	6	0	0	0	1	Winter	2011-08-30	August	4:00		Night
1610	000	1136	Yes	6	96	267.333	-171.333	0	0	0	0	2	0	1	2	0	1	0	4	Winter	2011-08-30	August	4:30		Night
1611	000	1137	Yes	4	64	267.333	-203.333	0	0	0	1	0	0	1	0	0	0	2	0	Winter	2011-08-30	August	5:00		Night
1612	000	1138	Yes	12	192	267.333	-75.3333	3	48	1	0	2	0	5	0	1	0	0	5	Winter	2011-08-30	August	5:30		Night
1613	000	1139	Yes	3	48	267.333	-219.333	3	48	0	0	0	0	0	0	0	0	0	6	Winter	2011-08-30	August	6:00		Night
1614	000	1140	Yes	16	256	267.333	-11.3333	1	16	0	5	0	0	2	0	7	0	1	4	Winter	2011-08-30	August	6:30	6:25 start	Dawn
1615	000	1141	Yes	29	464	267.333	196.667	0	0	0	3	2	0	2	1	6	0	15	4	Winter	2011-08-30	August	7:00		Dawn
1616	000	1142	Yes	32	512	267.333	244.667	2	32	0	0	3	0	12	2	2	0	11	5	Winter	2011-08-30	August	7:30	7:36 rise	Dawn
1617	000	1143	Yes	16	256	267.333	-11.3333	0	0	0	0	1	0	8	0	0	0	7	1	Winter	2011-08-30	August	8:00		Morning
1618	000	1144	Yes	14	224	267.333	-43.3333	1	16	0	5	0	0	2	0	3	0	3	2	Winter	2011-08-30	August	8:30		Morning
1619	000	1145	Yes	25	400	267.333	132.667	3	48	0	3	5	0	7	2	4	0	1	5	Winter	2011-08-30	August	9:00		Morning
1620	000	1146	Yes	20	320	267.333	52.6667	0	0	1	9	6	0	1	0	0	0	3	2	Winter	2011-08-30	August	9:30		Morning
1621	000	1147	Yes	15	240	267.333	-27.3333	0	0	0	2	3	0	0	0	1	3	6	2	Winter	2011-08-30	August	10:00		Morning
1622	000	1148	Yes	27	432	267.333	164.667	1	16	1	6	9	0	7	0	1	0	2	3	Winter	2011-08-30	August	10:30		Morning
1623	000	1149	Yes	26	416	267.333	148.667	1	16	1	1	10	0	9	1	0	0	3	3	Winter	2011-08-30	August	11:00		Morning
1624	000	1150	Yes	21	336	267.333	68.6667	1	16	0	1	4	0	5	0	0	0	10	3	Winter	2011-08-30	August	11:30		Morning
1625	000	1151	Yes	13	208	267.333	-59.3333	2	32	0	1	2	0	2	1	0	0	5	4	Winter	2011-08-30	August	12:00		Morning
1626	000	1152	Yes	17	272	267.333	4.66667	1	16	0	0	2	0	8	0	0	0	6	5	Winter	2011-08-30	August	12:30		Morning
1627	000	1153	Yes	16	256	267.333	-11.3333	0	0	0	0	5	0	7	0	0	0	4	2	Winter	2011-08-30	August	13:00	12:56 transit	Afternoon
1628	000	1154	Yes	10	160	267.333	-107.333	0	0	0	0	5	0	1	0	0	0	4	1	Winter	2011-08-30	August	13:30		Afternoon
1629	000	1155	Yes	6	96	267.333	-171.333	1	16	0	0	2	0	0	1	0	0	2	0	Winter	2011-08-30	August	14:00		Afternoon
1630	000	1156	Yes	12	192	267.333	-75.3333	4	64	0	0	2	0	4	0	0	0	2	3	Winter	2011-08-30	August	14:30		Afternoon
1631	000	1157	Yes	1	16	267.333	-251.333	0	0	0	0	0	0	1	0	0	0	0	2	Winter	2011-08-30	August	15:00		Afternoon
1632	000	1158	Yes	39	624	267.333	356.667	14	224	0	3	19	0	0	1	0	0	2	24	Winter	2011-08-30	August	15:30		Afternoon
1633	000	1159	Yes	7	112	267.333	-155.333	0	0	0	3	2	0	0	0	0	0	2	1	Winter	2011-08-30	August	16:00		Afternoon
1634	000	1160	Yes	17	272	267.333	4.66667	8	128	1	2	0	0	2	1	3	0	0	10	Winter	2011-08-30	August	16:30		Afternoon
1635	000	1161	Yes	12	192	267.333	-75.3333	1	16	1	3	1	0	1	0	5	0	0	6	Winter	2011-08-30	August	17:00		Afternoon
1636	000	1162	Yes	16	256	267.333	-11.3333	2	32	1	3	0	0	4	0	5	0	1	4	Winter	2011-08-30	August	17:30		Afternoon
1637	000	1163	Yes	18	288	267.333	20.6667	0	0	0	0	5	0	6	4	1	0	2	2	Winter	2011-08-30	August	18:00		Afternoon
1638	000	1164	Yes	24	384	267.333	116.667	4	64	1	3	4	0	10	1	0	0	1	6	Winter	2011-08-30	August	18:30	18:16 set	Dusk
1639	000	1165	Yes	17	272	267.333	4.66667	1	16	0	2	4	0	10	0	0	0	0	5	Winter	2011-08-30	August	19:00		Dusk
1640	000	1166	Yes	20	320	267.333	52.6667	0	0	1	0	7	0	7	0	1	0	4	1	Winter	2011-08-30	August	19:30	19:27 end	Night
1641	000	1167	Yes	17	272	267.333	4.66667	6	96	0	0	3	0	6	0	0	0	2	9	Winter	2011-08-30	August	20:00		Night
1642	000	1168	Yes	8	128	267.333	-139.333	0	0	0	0	2	0	1	0	0	1	4	2	Winter	2011-08-30	August	20:30		Night
1643	000	1169	Yes	15	240	267.333	-27.3333	1	16	0	0	1	0	10	0	3	0	0	4	Winter	2011-08-30	August	21:00		Night
1644	000	1170	Yes	28	448	267.333	180.667	3	48	0	0	9	0	13	0	3	0	0	14	Winter	2011-08-30	August	21:30		Night
1645	000	1171	Yes	27	432	267.333	164.667	0	0	0	2	7	0	9	1	1	0	7	1	Winter	2011-08-30	August	22:00		Night
1646	000	1172	Yes	12	192	267.333	-75.3333	1	16	0	0	2	0	3	5	0	0	1	3	Winter	2011-08-30	August	22:30		Night
1647	000	1173	Yes	25	400	267.333	132.667	0	0	0	0	2	0	4	0	18	0	1	2	Winter	2011-08-30	August	23:00		Night
1648	000	1174	Yes	21	336	267.333	68.6667	5	80	0	1	6	0	3	0	4	1	1	7	Winter	2011-08-30	August	23:30		Night
1649	000	1175	Yes	38	608	156.667	451.333	16	256	0	0	17	0	2	0	0	0	3	18	Winter	2011-08-31	August	0:00		Night
1650	000	1176	Yes	30	480	156.667	323.333	7	112	2	0	15	0	2	0	0	0	4	10	Winter	2011-08-31	August	0:30		Night
1651	000	1177	Yes	12	192	156.667	35.3333	1	16	0	0	3	0	3	2	1	0	2	3	Winter	2011-08-31	August	1:00		Night
1652	000	1178	Yes	4	64	156.667	-92.6667	2	32	0	0	0	0	2	0	0	0	0	6	Winter	2011-08-31	August	1:30		Night
1653	000	1179	Yes	19	304	156.667	147.333	1	16	1	0	17	0	0	0	0	0	0	7	Winter	2011-08-31	August	2:00		Night
1654	000	1180	Yes	1	16	156.667	-140.667	0	0	0	0	1	0	0	0	0	0	0	2	Winter	2011-08-31	August	2:30		Night
1655	000	1181	Yes	3	48	156.667	-108.667	1	16	0	0	2	0	0	0	0	0	0	3	Winter	2011-08-31	August	3:00		Night
1656	000	1182	Yes	2	32	156.667	-124.667	0	0	0	0	0	0	2	0	0	0	0	0	Winter	2011-08-31	August	3:30		Night
1657	000	1183	No	0	0	156.667	-156.667	0	0	0	0	0	0	0	0	0	0	0	2	Winter	2011-08-31	August	4:00		Night
1658	000	1184	Yes	3	48	156.667	-108.667	0	0	0	0	1	0	1	0	0	0	1	5	Winter	2011-08-31	August	4:30		Night
1659	000	1185	Yes	23	368	156.667	211.333	0	0	0	2	2	0	11	0	5	0	3	0	Winter	2011-08-31	August	5:00		Night
1660	000	1186	Yes	8	128	156.667	-28.6667	0	0	0	0	3	0	3	1	0	0	1	0	Winter	2011-08-31	August	5:30		Night
1661	000	1187	Yes	6	96	156.667	-60.6667	1	16	0	0	2	0	2	0	1	0	0	6	Winter	2011-08-31	August	6:00		Night
1662	000	1188	Yes	1	16	156.667	-140.667	0	0	0	0	0	0	1	0	0	0	0	2	Winter	2011-08-31	August	6:30	6:23 begin	Dawn
1663	000	1189	Yes	3	48	156.667	-108.667	2	32	0	0	1	0	0	0	0	0	0	5	Winter	2011-08-31	August	7:00		Dawn
1664	000	1190	Yes	5	80	156.667	-76.6667	0	0	0	0	4	0	1	0	0	0	0	5	Winter	2011-08-31	August	7:30	7:34 rise	Dawn
1665	000	1191	Yes	10	160	156.667	3.33333	5	80	0	0	2	0	3	0	0	0	0	5	Winter	2011-08-31	August	8:00		Morning
1666	000	1192	Yes	4	64	156.667	-92.6667	1	16	0	0	0	0	3	0	0	0	0	3	Winter	2011-08-31	August	8:30		Morning
1667	000	1193	Yes	8	128	156.667	-28.6667	0	0	0	0	5	0	2	0	0	0	1	0	Winter	2011-08-31	August	9:00		Morning
1668	000	1194	Yes	4	64	156.667	-92.6667	0	0	0	0	1	0	0	0	0	0	3	0	Winter	2011-08-31	August	9:30		Morning
1669	000	1195	Yes	13	208	156.667	51.3333	0	0	0	0	3	0	6	0	0	0	4	7	Winter	2011-08-31	August	10:00		Morning
1670	000	1196	Yes	5	80	156.667	-76.6667	0	0	0	0	0	0	5	0	0	0	0	0	Winter	2011-08-31	August	10:30		Morning
1671	000	1197	Yes	1	16	156.667	-140.667	0	0	0	0	1	0	0	0	0	0	0	1	Winter	2011-08-31	August	11:00		Morning
1672	000	1198	Yes	2	32	156.667	-124.667	1	16	0	0	0	0	1	0	0	0	0	1	Winter	2011-08-31	August	11:30		Morning
1673	000	1199	Yes	2	32	156.667	-124.667	1	16	0	0	0	0	1	0	0	0	0	1	Winter	2011-08-31	August	12:00		Morning
1674	000	1200	Yes	2	32	156.667	-124.667	0	0	0	0	0	0	2	0	0	0	0	2	Winter	2011-08-31	August	12:30		Morning
1675	000	1201	Yes	5	80	156.667	-76.6667	3	48	0	0	0	0	1	0	1	0	0	8	Winter	2011-08-31	August	13:00	12:56 transit	Afternoon
1676	000	1202	Yes	13	208	156.667	51.3333	0	0	0	3	5	0	5	0	0	0	0	2	Winter	2011-08-31	August	13:30		Afternoon
1677	000	1203	Yes	16	256	156.667	99.3333	1	16	0	4	5	0	2	0	0	0	4	4	Winter	2011-08-31	August	14:00		Afternoon
1678	000	1204	Yes	8	128	156.667	-28.6667	0	0	0	0	5	0	3	0	0	0	0	2	Winter	2011-08-31	August	14:30		Afternoon
1679	000	1205	Yes	11	176	156.667	19.3333	0	0	0	0	8	0	2	0	0	0	1	2	Winter	2011-08-31	August	15:00		Afternoon
1680	000	1206	Yes	6	96	156.667	-60.6667	2	32	0	0	2	0	2	0	0	0	0	3	Winter	2011-08-31	August	15:30		Afternoon
1681	000	1207	Yes	29	464	156.667	307.333	0	0	3	2	13	0	8	0	3	0	0	3	Winter	2011-08-31	August	16:00		Afternoon
1682	000	1208	Yes	1	16	156.667	-140.667	0	0	0	0	0	0	1	0	0	0	0	1	Winter	2011-08-31	August	16:30		Afternoon
1683	000	1209	Yes	13	208	156.667	51.3333	3	48	0	0	1	0	5	0	4	0	0	5	Winter	2011-08-31	August	17:00		Afternoon
1684	000	1210	Yes	8	128	156.667	-28.6667	1	16	0	0	0	0	4	0	0	0	3	0	Winter	2011-08-31	August	17:30		Afternoon
1685	000	1211	Yes	1	16	156.667	-140.667	0	0	0	0	0	0	1	0	0	0	0	4	Winter	2011-08-31	August	18:00		Afternoon
1686	000	1212	No	0	0	156.667	-156.667	0	0	0	0	0	0	0	0	0	0	0	2	Winter	2011-08-31	August	18:30	18:18 set	Dusk
1687	000	1213	Yes	4	64	156.667	-92.6667	2	32	0	0	2	0	0	0	0	0	0	4	Winter	2011-08-31	August	19:00		Dusk
1688	000	1214	Yes	27	432	156.667	275.333	24	384	0	0	1	0	0	0	0	0	2	25	Winter	2011-08-31	August	19:30	19:29 end	Night
1689	000	1215	Yes	48	768	156.667	611.333	9	144	1	0	14	0	6	6	3	0	4	14	Winter	2011-08-31	August	20:00		Night
1690	000	1216	Yes	6	96	156.667	-60.6667	6	96	0	0	0	0	0	0	0	0	0	5	Winter	2011-08-31	August	20:30		Night
1691	000	1217	Yes	9	144	156.667	-12.6667	3	48	0	0	5	0	1	0	0	0	0	2	Winter	2011-08-31	August	21:00		Night
1692	000	1218	Yes	17	272	156.667	115.333	11	176	1	0	1	0	1	3	0	0	0	12	Winter	2011-08-31	August	21:30		Night
1693	000	1219	Yes	6	96	156.667	-60.6667	1	16	1	0	2	0	1	1	0	0	0	2	Winter	2011-08-31	August	22:00		Night
1694	000	1220	Yes	29	464	156.667	307.333	19	304	0	0	8	0	2	0	0	0	0	21	Winter	2011-08-31	August	22:30		Night
1695	000	1221	Yes	4	64	156.667	-92.6667	2	32	0	0	0	0	2	0	0	0	0	5	Winter	2011-08-31	August	23:00		Night
1696	000	1222	No	0	0	156.667	-156.667	0	0	0	0	0	0	0	0	0	0	0	0	Winter	2011-08-31	August	23:30		Night
1697	000	1223	Yes	5	80	85.6667	-5.66667	3	48	0	0	0	0	0	0	0	0	2	5	Spring	2011-09-01	September	0:00		Night
1698	000	1224	Yes	4	64	85.6667	-21.6667	3	48	0	0	1	0	0	0	0	0	0	3	Spring	2011-09-01	September	0:30		Night
1699	000	1225	Yes	7	112	85.6667	26.3333	1	16	0	0	6	0	0	0	0	0	0	14	Spring	2011-09-01	September	1:00		Night
1700	000	1226	Yes	8	128	85.6667	42.3333	6	96	0	0	1	0	0	0	0	0	1	6	Spring	2011-09-01	September	1:30		Night
1701	000	1227	Yes	1	16	85.6667	-69.6667	0	0	0	0	1	0	0	0	0	0	0	0	Spring	2011-09-01	September	2:00		Night
1702	000	1228	Yes	3	48	85.6667	-37.6667	1	16	0	0	2	0	0	0	0	0	0	1	Spring	2011-09-01	September	2:30		Night
1703	000	1229	Yes	3	48	85.6667	-37.6667	1	16	0	0	1	0	1	0	0	0	0	1	Spring	2011-09-01	September	3:00		Night
1704	000	1230	Yes	21	336	85.6667	250.333	11	176	0	0	8	0	2	0	0	0	0	12	Spring	2011-09-01	September	3:30		Night
1705	000	1231	Yes	9	144	85.6667	58.3333	6	96	0	0	1	0	2	0	0	0	0	9	Spring	2011-09-01	September	4:00		Night
1706	000	1232	Yes	1	16	85.6667	-69.6667	1	16	0	0	0	0	0	0	0	0	0	2	Spring	2011-09-01	September	4:30		Night
1707	000	1233	Yes	7	112	85.6667	26.3333	5	80	0	0	1	0	0	0	0	0	1	8	Spring	2011-09-01	September	5:00		Night
1708	000	1234	Yes	6	96	85.6667	10.3333	6	96	0	0	0	0	0	0	0	0	0	9	Spring	2011-09-01	September	5:30		Night
1709	000	1235	Yes	3	48	85.6667	-37.6667	0	0	0	0	1	0	1	1	0	0	0	3	Spring	2011-09-01	September	6:00		Night
1710	000	1236	Yes	4	64	85.6667	-21.6667	1	16	0	0	0	0	0	2	0	0	1	1	Spring	2011-09-01	September	6:30	6:21 begin	Dawn
1711	000	1237	Yes	8	128	85.6667	42.3333	5	80	0	0	1	0	1	0	1	0	0	9	Spring	2011-09-01	September	7:00		Dawn
1712	000	1238	Yes	16	256	85.6667	170.333	0	0	0	12	3	0	1	0	0	0	0	3	Spring	2011-09-01	September	7:30	7:30 rise	Morning
1713	000	1239	Yes	4	64	85.6667	-21.6667	0	0	0	0	0	0	0	1	3	0	0	1	Spring	2011-09-01	September	8:00		Morning
1714	000	1240	Yes	15	240	85.6667	154.333	0	0	0	6	0	0	4	2	3	0	0	3	Spring	2011-09-01	September	8:30		Morning
1715	000	1241	No	0	0	85.6667	-85.6667	0	0	0	0	0	0	0	0	0	0	0	1	Spring	2011-09-01	September	9:00		Morning
1716	000	1242	No	0	0	85.6667	-85.6667	0	0	0	0	0	0	0	0	0	0	0	1	Spring	2011-09-01	September	9:30		Morning
1717	000	1243	No	0	0	85.6667	-85.6667	0	0	0	0	0	0	0	0	0	0	0	1	Spring	2011-09-01	September	10:00		Morning
1718	000	1244	Yes	7	112	85.6667	26.3333	5	80	0	0	2	0	0	0	0	0	0	6	Spring	2011-09-01	September	10:30		Morning
1719	000	1245	No	0	0	85.6667	-85.6667	0	0	0	0	0	0	0	0	0	0	0	0	Spring	2011-09-01	September	11:00		Morning
1720	000	1246	No	0	0	85.6667	-85.6667	0	0	0	0	0	0	0	0	0	0	0	1	Spring	2011-09-01	September	11:30		Morning
1721	000	1247	Yes	1	16	85.6667	-69.6667	1	16	0	0	0	0	0	0	0	0	0	1	Spring	2011-09-01	September	12:00		Morning
1722	000	1248	No	0	0	85.6667	-85.6667	0	0	0	0	0	0	0	0	0	0	0	0	Spring	2011-09-01	September	12:30		Morning
1723	000	1249	No	0	0	85.6667	-85.6667	0	0	0	0	0	0	0	0	0	0	0	0	Spring	2011-09-01	September	13:00	12:55 transit	Afternoon
1724	000	1250	No	0	0	85.6667	-85.6667	0	0	0	0	0	0	0	0	0	0	0	0	Spring	2011-09-01	September	13:30		Afternoon
1725	000	1251	No	0	0	85.6667	-85.6667	0	0	0	0	0	0	0	0	0	0	0	0	Spring	2011-09-01	September	14:00		Afternoon
1726	000	1252	No	0	0	85.6667	-85.6667	0	0	0	0	0	0	0	0	0	0	0	0	Spring	2011-09-01	September	14:30		Afternoon
1727	000	1253	No	0	0	85.6667	-85.6667	0	0	0	0	0	0	0	0	0	0	0	0	Spring	2011-09-01	September	15:00		Afternoon
1728	000	1254	No	0	0	85.6667	-85.6667	0	0	0	0	0	0	0	0	0	0	0	0	Spring	2011-09-01	September	15:30		Afternoon
1729	000	1255	No	0	0	85.6667	-85.6667	0	0	0	0	0	0	0	0	0	0	0	0	Spring	2011-09-01	September	16:00		Afternoon
1730	000	1256	No	0	0	85.6667	-85.6667	0	0	0	0	0	0	0	0	0	0	0	1	Spring	2011-09-01	September	16:30		Afternoon
1731	000	1257	Yes	7	112	85.6667	26.3333	4	64	0	0	3	0	0	0	0	0	0	5	Spring	2011-09-01	September	17:00		Afternoon
1732	000	1258	Yes	10	160	85.6667	74.3333	0	0	0	0	2	0	2	0	0	0	6	1	Spring	2011-09-01	September	17:30		Afternoon
1733	000	1259	Yes	8	128	85.6667	42.3333	5	80	0	0	1	0	0	0	0	0	2	4	Spring	2011-09-01	September	18:00		Afternoon
1734	000	1260	Yes	8	128	85.6667	42.3333	2	32	0	0	5	0	1	0	0	0	0	4	Spring	2011-09-01	September	18:30	18:19 set	Dusk
1735	000	1261	Yes	14	224	85.6667	138.333	0	0	0	0	11	0	1	0	0	0	2	4	Spring	2011-09-01	September	19:00		Dusk
1736	000	1262	Yes	4	64	85.6667	-21.6667	0	0	0	0	3	0	1	0	0	0	0	0	Spring	2011-09-01	September	19:30	19:30 end	Night
1737	000	1263	Yes	15	240	85.6667	154.333	10	160	0	0	4	0	0	0	1	0	0	8	Spring	2011-09-01	September	20:00		Night
1738	000	1264	Yes	4	64	85.6667	-21.6667	0	0	0	0	0	0	0	0	0	1	3	1	Spring	2011-09-01	September	20:30		Night
1739	000	1265	Yes	15	240	85.6667	154.333	1	16	0	0	2	0	10	0	0	0	2	0	Spring	2011-09-01	September	21:00		Night
1740	000	1266	Yes	2	32	85.6667	-53.6667	0	0	0	0	2	0	0	0	0	0	0	0	Spring	2011-09-01	September	21:30		Night
1741	000	1267	Yes	9	144	85.6667	58.3333	1	16	0	0	3	0	4	0	1	0	0	3	Spring	2011-09-01	September	22:00		Night
1742	000	1268	Yes	15	240	85.6667	154.333	8	128	1	2	0	0	2	2	0	0	0	11	Spring	2011-09-01	September	22:30		Night
1743	000	1269	Yes	4	64	85.6667	-21.6667	1	16	0	0	0	0	2	0	0	0	1	2	Spring	2011-09-01	September	23:00		Night
1744	000	1270	Yes	9	144	85.6667	58.3333	5	80	1	0	3	0	0	0	0	0	0	9	Spring	2011-09-01	September	23:30		Night
1745	000	1271	Yes	19	304	80.3333	223.667	16	256	0	0	0	0	0	0	2	0	1	10	Spring	2011-09-02	September	0:00		Night
1746	000	1272	Yes	5	80	80.3333	-0.333333	5	80	0	0	0	0	0	0	0	0	0	8	Spring	2011-09-02	September	0:30		Night
1747	000	1273	Yes	1	16	80.3333	-64.3333	0	0	0	0	0	0	0	0	1	0	0	2	Spring	2011-09-02	September	1:00		Night
1748	000	1274	No	0	0	80.3333	-80.3333	0	0	0	0	0	0	0	0	0	0	0	1	Spring	2011-09-02	September	1:30		Night
1749	000	1275	No	0	0	80.3333	-80.3333	0	0	0	0	0	0	0	0	0	0	0	1	Spring	2011-09-02	September	2:00		Night
1750	000	1276	Yes	1	16	80.3333	-64.3333	0	0	0	0	0	0	1	0	0	0	0	1	Spring	2011-09-02	September	2:30		Night
1751	000	1277	Yes	3	48	80.3333	-32.3333	0	0	0	0	0	0	1	0	2	0	0	0	Spring	2011-09-02	September	3:00		Night
1752	000	1278	Yes	4	64	80.3333	-16.3333	0	0	0	0	2	0	1	0	0	0	1	4	Spring	2011-09-02	September	3:30		Night
1753	000	1279	Yes	10	160	80.3333	79.6667	10	160	0	0	0	0	0	0	0	0	0	14	Spring	2011-09-02	September	4:00		Night
1754	000	1280	No	0	0	80.3333	-80.3333	0	0	0	0	0	0	0	0	0	0	0	1	Spring	2011-09-02	September	4:30		Night
1755	000	1281	Yes	14	224	80.3333	143.667	10	160	0	0	4	0	0	0	0	0	0	11	Spring	2011-09-02	September	5:00		Night
1756	000	1282	Yes	2	32	80.3333	-48.3333	0	0	0	0	2	0	0	0	0	0	0	1	Spring	2011-09-02	September	5:30		Night
1757	000	1283	No	0	0	80.3333	-80.3333	0	0	0	0	0	0	0	0	0	0	0	0	Spring	2011-09-02	September	6:00		Night
1758	000	1284	No	0	0	80.3333	-80.3333	0	0	0	0	0	0	0	0	0	0	0	0	Spring	2011-09-02	September	6:30	6:19 begin	Dawn
1759	000	1285	No	0	0	80.3333	-80.3333	0	0	0	0	0	0	0	0	0	0	0	0	Spring	2011-09-02	September	7:00		Dawn
1760	000	1286	No	0	0	80.3333	-80.3333	0	0	0	0	0	0	0	0	0	0	0	0	Spring	2011-09-02	September	7:30	7:30 rise	Morning
1761	000	1287	No	0	0	80.3333	-80.3333	0	0	0	0	0	0	0	0	0	0	0	0	Spring	2011-09-02	September	8:00		Morning
1762	000	1288	No	0	0	80.3333	-80.3333	0	0	0	0	0	0	0	0	0	0	0	0	Spring	2011-09-02	September	8:30		Morning
1763	000	1289	No	0	0	80.3333	-80.3333	0	0	0	0	0	0	0	0	0	0	0	1	Spring	2011-09-02	September	9:00		Morning
1764	000	1290	No	0	0	80.3333	-80.3333	0	0	0	0	0	0	0	0	0	0	0	1	Spring	2011-09-02	September	9:30		Morning
1765	000	1291	Yes	1	16	80.3333	-64.3333	1	16	0	0	0	0	0	0	0	0	0	2	Spring	2011-09-02	September	10:00		Morning
1766	000	1292	No	0	0	80.3333	-80.3333	0	0	0	0	0	0	0	0	0	0	0	0	Spring	2011-09-02	September	10:30		Morning
1767	000	1293	Yes	1	16	80.3333	-64.3333	0	0	1	0	1	0	0	0	0	0	0	0	Spring	2011-09-02	September	11:00		Morning
1768	000	1294	No	0	0	80.3333	-80.3333	0	0	0	0	0	0	0	0	0	0	0	1	Spring	2011-09-02	September	11:30		Morning
1769	000	1295	No	0	0	80.3333	-80.3333	0	0	0	0	0	0	0	0	0	0	0	0	Spring	2011-09-02	September	12:00		Morning
1770	000	1296	No	0	0	80.3333	-80.3333	0	0	0	0	0	0	0	0	0	0	0	0	Spring	2011-09-02	September	12:30		Morning
1771	000	1297	No	0	0	80.3333	-80.3333	0	0	0	0	0	0	0	0	0	0	0	1	Spring	2011-09-02	September	13:00	12:55 transit	Afternoon
1772	000	1298	Yes	1	16	80.3333	-64.3333	0	0	0	0	1	0	0	0	0	0	0	1	Spring	2011-09-02	September	13:30		Afternoon
1773	000	1299	No	0	0	80.3333	-80.3333	0	0	0	0	0	0	0	0	0	0	0	0	Spring	2011-09-02	September	14:00		Afternoon
1774	000	1300	No	0	0	80.3333	-80.3333	0	0	0	0	0	0	0	0	0	0	0	0	Spring	2011-09-02	September	14:30		Afternoon
1775	000	1301	No	0	0	80.3333	-80.3333	0	0	0	0	0	0	0	0	0	0	0	0	Spring	2011-09-02	September	15:00		Afternoon
1776	000	1302	No	0	0	80.3333	-80.3333	0	0	0	0	0	0	0	0	0	0	0	0	Spring	2011-09-02	September	15:30		Afternoon
1777	000	1303	No	0	0	80.3333	-80.3333	0	0	0	0	0	0	0	0	0	0	0	0	Spring	2011-09-02	September	16:00		Afternoon
1778	000	1304	No	0	0	80.3333	-80.3333	0	0	0	0	0	0	0	0	0	0	0	1	Spring	2011-09-02	September	16:30		Afternoon
1779	000	1305	Yes	9	144	80.3333	63.6667	0	0	0	3	4	0	0	0	0	2	0	0	Spring	2011-09-02	September	17:00		Afternoon
1780	000	1306	Yes	5	80	80.3333	-0.333333	0	0	0	1	3	0	0	0	1	0	0	1	Spring	2011-09-02	September	17:30		Afternoon
1781	000	1307	Yes	2	32	80.3333	-48.3333	0	0	0	0	1	0	0	0	0	0	1	0	Spring	2011-09-02	September	18:00		Afternoon
1782	000	1308	Yes	4	64	80.3333	-16.3333	0	0	0	0	3	0	0	1	0	0	0	2	Spring	2011-09-02	September	18:30	18:21 set	Dusk
1783	000	1309	Yes	29	464	80.3333	383.667	20	320	1	0	8	0	0	0	0	0	0	13	Spring	2011-09-02	September	19:00		Dusk
1784	000	1310	Yes	31	496	80.3333	415.667	16	256	0	0	12	0	3	0	0	0	0	23	Spring	2011-09-02	September	19:30	19:31 end	Dusk
1785	000	1311	Yes	18	288	80.3333	207.667	3	48	0	1	1	0	5	2	1	0	5	4	Spring	2011-09-02	September	20:00		Night
1786	000	1312	Yes	31	496	80.3333	415.667	14	224	0	0	8	0	5	0	0	0	4	16	Spring	2011-09-02	September	20:30		Night
1787	000	1313	Yes	6	96	80.3333	15.6667	5	80	0	0	1	0	0	0	0	0	0	10	Spring	2011-09-02	September	21:00		Night
1788	000	1314	Yes	6	96	80.3333	15.6667	0	0	0	1	2	0	2	0	0	0	1	4	Spring	2011-09-02	September	21:30		Night
1789	000	1315	Yes	6	96	80.3333	15.6667	0	0	0	0	4	0	0	0	0	0	0	5	Spring	2011-09-02	September	22:00		Night
1790	000	1316	Yes	22	352	80.3333	271.667	0	0	0	0	7	0	14	0	0	0	1	1	Spring	2011-09-02	September	22:30		Night
1791	000	1317	No	0	0	80.3333	-80.3333	0	0	0	0	0	0	0	0	0	0	0	0	Spring	2011-09-02	September	23:00		Night
1792	000	1318	Yes	10	160	80.3333	79.6667	2	32	2	0	0	0	6	0	0	0	0	3	Spring	2011-09-02	September	23:30		Night
1793	000	1319	Yes	1	16	31.6667	-15.6667	0	0	0	0	0	0	1	0	0	0	0	3	Spring	2011-09-03	September	0:00		Night
1794	000	1320	Yes	1	16	31.6667	-15.6667	1	16	0	0	0	0	0	0	0	0	0	1	Spring	2011-09-03	September	0:30		Night
1795	000	1321	Yes	4	64	31.6667	32.3333	2	32	0	0	2	0	0	0	0	0	0	6	Spring	2011-09-03	September	1:00		Night
1796	000	1322	Yes	5	80	31.6667	48.3333	2	32	0	0	3	0	0	0	0	0	0	2	Spring	2011-09-03	September	1:30		Night
1797	000	1323	Yes	4	64	31.6667	32.3333	3	48	0	0	0	0	1	0	0	0	0	5	Spring	2011-09-03	September	2:00		Night
1798	000	1324	No	0	0	31.6667	-31.6667	0	0	0	0	0	0	0	0	0	0	0	0	Spring	2011-09-03	September	2:30		Night
1799	000	1325	No	0	0	31.6667	-31.6667	0	0	0	0	0	0	0	0	0	0	0	1	Spring	2011-09-03	September	3:00		Night
1800	000	1326	Yes	1	16	31.6667	-15.6667	1	16	0	0	0	0	0	0	0	0	0	3	Spring	2011-09-03	September	3:30		Night
1801	000	1327	Yes	4	64	31.6667	32.3333	1	16	0	0	0	0	3	0	0	0	0	2	Spring	2011-09-03	September	4:00		Night
1802	000	1328	No	0	0	31.6667	-31.6667	0	0	0	0	0	0	0	0	0	0	0	3	Spring	2011-09-03	September	4:30		Night
1803	000	1329	Yes	9	144	31.6667	112.333	0	0	0	3	1	0	5	0	0	0	0	1	Spring	2011-09-03	September	5:00		Night
1804	000	1330	Yes	2	32	31.6667	0.333333	1	16	0	0	0	0	1	0	0	0	0	4	Spring	2011-09-03	September	5:30		Night
1805	000	1331	No	0	0	31.6667	-31.6667	0	0	0	0	0	0	0	0	0	0	0	0	Spring	2011-09-03	September	6:00		Night
1806	000	1332	No	0	0	31.6667	-31.6667	0	0	0	0	0	0	0	0	0	0	0	1	Spring	2011-09-03	September	6:30	6:17 begin	Dawn
1807	000	1333	Yes	2	32	31.6667	0.333333	2	32	0	0	0	0	0	0	0	0	0	2	Spring	2011-09-03	September	7:00		Dawn
1808	000	1334	No	0	0	31.6667	-31.6667	0	0	0	0	0	0	0	0	0	0	0	1	Spring	2011-09-03	September	7:30	7:28 rise	Morning
1809	000	1335	Yes	1	16	31.6667	-15.6667	1	16	0	0	0	0	0	0	0	0	0	0	Spring	2011-09-03	September	8:00		Morning
1810	000	1336	Yes	6	96	31.6667	64.3333	2	32	0	0	3	0	0	0	0	1	0	3	Spring	2011-09-03	September	8:30		Morning
1811	000	1337	Yes	1	16	31.6667	-15.6667	1	16	0	0	0	0	0	0	0	0	0	1	Spring	2011-09-03	September	9:00		Morning
1812	000	1338	No	0	0	31.6667	-31.6667	0	0	0	0	0	0	0	0	0	0	0	0	Spring	2011-09-03	September	9:30		Morning
1813	000	1339	No	0	0	31.6667	-31.6667	0	0	0	0	0	0	0	0	0	0	0	2	Spring	2011-09-03	September	10:00		Morning
1814	000	1340	Yes	4	64	31.6667	32.3333	0	0	0	0	0	0	4	0	0	0	0	0	Spring	2011-09-03	September	10:30		Morning
1815	000	1341	No	0	0	31.6667	-31.6667	0	0	0	0	0	0	0	0	0	0	0	4	Spring	2011-09-03	September	11:00		Morning
1816	000	1342	No	0	0	31.6667	-31.6667	0	0	0	0	0	0	0	0	0	0	0	0	Spring	2011-09-03	September	11:30		Morning
1817	000	1343	Yes	3	48	31.6667	16.3333	3	48	0	0	0	0	0	0	0	0	0	3	Spring	2011-09-03	September	12:00		Morning
1818	000	1344	No	0	0	31.6667	-31.6667	0	0	0	0	0	0	0	0	0	0	0	0	Spring	2011-09-03	September	12:30		Morning
1819	000	1345	No	0	0	31.6667	-31.6667	0	0	0	0	0	0	0	0	0	0	0	0	Spring	2011-09-03	September	13:00	12:55 transit	Afternoon
1820	000	1346	No	0	0	31.6667	-31.6667	0	0	0	0	0	0	0	0	0	0	0	0	Spring	2011-09-03	September	13:30		Afternoon
1821	000	1347	No	0	0	31.6667	-31.6667	0	0	0	0	0	0	0	0	0	0	0	1	Spring	2011-09-03	September	14:00		Afternoon
1822	000	1348	No	0	0	31.6667	-31.6667	0	0	0	0	0	0	0	0	0	0	0	0	Spring	2011-09-03	September	14:30		Afternoon
1823	000	1349	No	0	0	31.6667	-31.6667	0	0	0	0	0	0	0	0	0	0	0	1	Spring	2011-09-03	September	15:00		Afternoon
1824	000	1350	Yes	6	96	31.6667	64.3333	6	96	0	0	0	0	0	0	0	0	0	5	Spring	2011-09-03	September	15:30		Afternoon
1825	000	1351	No	0	0	31.6667	-31.6667	0	0	0	0	0	0	0	0	0	0	0	0	Spring	2011-09-03	September	16:00		Afternoon
1826	000	1352	No	0	0	31.6667	-31.6667	0	0	0	0	0	0	0	0	0	0	0	1	Spring	2011-09-03	September	16:30		Afternoon
1827	000	1353	No	0	0	31.6667	-31.6667	0	0	0	0	0	0	0	0	0	0	0	0	Spring	2011-09-03	September	17:00		Afternoon
1828	000	1354	No	0	0	31.6667	-31.6667	0	0	0	0	0	0	0	0	0	0	0	0	Spring	2011-09-03	September	17:30		Afternoon
1829	000	1355	No	0	0	31.6667	-31.6667	0	0	0	0	0	0	0	0	0	0	0	0	Spring	2011-09-03	September	18:00		Afternoon
1830	000	1356	No	0	0	31.6667	-31.6667	0	0	0	0	0	0	0	0	0	0	0	3	Spring	2011-09-03	September	18:30	18:22 set	Dusk
1831	000	1357	Yes	2	32	31.6667	0.333333	1	16	1	0	0	0	0	0	0	0	0	2	Spring	2011-09-03	September	19:00		Dusk
1832	000	1358	Yes	7	112	31.6667	80.3333	4	64	0	0	3	0	0	0	0	0	0	4	Spring	2011-09-03	September	19:30	19:33 end	Dusk
1833	000	1359	Yes	7	112	31.6667	80.3333	5	80	0	0	2	0	0	0	0	0	0	5	Spring	2011-09-03	September	20:00		Night
1834	000	1360	Yes	5	80	31.6667	48.3333	2	32	0	0	1	0	2	0	0	0	0	3	Spring	2011-09-03	September	20:30		Night
1835	000	1361	Yes	1	16	31.6667	-15.6667	0	0	0	0	0	0	1	0	0	0	0	2	Spring	2011-09-03	September	21:00		Night
1836	000	1362	Yes	4	64	31.6667	32.3333	4	64	0	0	0	0	0	0	0	0	0	5	Spring	2011-09-03	September	21:30		Night
1837	000	1363	Yes	11	176	31.6667	144.333	6	96	0	0	1	0	4	0	0	0	0	6	Spring	2011-09-03	September	22:00		Night
1838	000	1364	Yes	3	48	31.6667	16.3333	0	0	0	0	3	0	0	0	0	0	0	0	Spring	2011-09-03	September	22:30		Night
1839	000	1365	Yes	1	16	31.6667	-15.6667	0	0	0	0	1	0	0	0	0	0	0	0	Spring	2011-09-03	September	23:00		Night
1840	000	1366	No	0	0	31.6667	-31.6667	0	0	0	0	0	0	0	0	0	0	0	0	Spring	2011-09-03	September	23:30		Night
1841	000	1367	No	0	0	56	-56	0	0	0	0	0	0	0	0	0	0	0	0	Spring	2011-09-04	September	0:00		Night
1842	000	1368	Yes	7	112	56	56	5	80	0	1	1	0	0	0	0	0	0	3	Spring	2011-09-04	September	0:30		Night
1843	000	1369	Yes	2	32	56	-24	1	16	0	0	1	0	0	0	0	0	0	0	Spring	2011-09-04	September	1:00		Night
1844	000	1370	No	0	0	56	-56	0	0	0	0	0	0	0	0	0	0	0	0	Spring	2011-09-04	September	1:30		Night
1845	000	1371	Yes	3	48	56	-8	0	0	0	0	2	0	0	0	1	0	0	0	Spring	2011-09-04	September	2:00		Night
1846	000	1372	Yes	7	112	56	56	4	64	0	0	3	0	0	0	0	0	0	7	Spring	2011-09-04	September	2:30		Night
1847	000	1373	Yes	22	352	56	296	7	112	0	0	12	0	3	0	0	0	0	13	Spring	2011-09-04	September	3:00		Night
1848	000	1374	No	0	0	56	-56	0	0	0	0	0	0	0	0	0	0	0	1	Spring	2011-09-04	September	3:30		Night
1849	000	1375	No	0	0	56	-56	0	0	0	0	0	0	0	0	0	0	0	0	Spring	2011-09-04	September	4:00		Night
1850	000	1376	No	0	0	56	-56	0	0	0	0	0	0	0	0	0	0	0	0	Spring	2011-09-04	September	4:30		Night
1851	000	1377	No	0	0	56	-56	0	0	0	0	0	0	0	0	0	0	0	0	Spring	2011-09-04	September	5:00		Night
1852	000	1378	Yes	9	144	56	88	1	16	0	0	8	0	0	0	0	0	0	1	Spring	2011-09-04	September	5:30		Night
1853	000	1379	Yes	33	528	56	472	0	0	0	1	18	0	2	5	3	0	4	5	Spring	2011-09-04	September	6:00	6:15 begin	Night
1854	000	1380	Yes	4	64	56	8	0	0	0	0	0	0	0	0	0	0	4	1	Spring	2011-09-04	September	6:30		Dawn
1855	000	1381	No	0	0	56	-56	0	0	0	0	0	0	0	0	0	0	0	0	Spring	2011-09-04	September	7:00		Dawn
1856	000	1382	Yes	2	32	56	-24	1	16	0	0	0	0	1	0	0	0	0	3	Spring	2011-09-04	September	7:30	7:26 rise	Morning
1857	000	1383	Yes	7	112	56	56	1	16	0	0	5	0	1	0	0	0	0	3	Spring	2011-09-04	September	8:00		Morning
1858	000	1384	No	0	0	56	-56	0	0	0	0	0	0	0	0	0	0	0	1	Spring	2011-09-04	September	8:30		Morning
1859	000	1385	Yes	1	16	56	-40	1	16	0	0	0	0	0	0	0	0	0	5	Spring	2011-09-04	September	9:00		Morning
1860	000	1386	No	0	0	56	-56	0	0	0	0	0	0	0	0	0	0	0	0	Spring	2011-09-04	September	9:30		Morning
1861	000	1387	Yes	1	16	56	-40	0	0	0	1	0	0	0	0	0	0	0	6	Spring	2011-09-04	September	10:00		Morning
1862	000	1388	No	0	0	56	-56	0	0	0	0	0	0	0	0	0	0	0	1	Spring	2011-09-04	September	10:30		Morning
1863	000	1389	Yes	2	32	56	-24	0	0	0	0	1	0	1	0	0	0	0	2	Spring	2011-09-04	September	11:00		Morning
1864	000	1390	No	0	0	56	-56	0	0	0	0	0	0	0	0	0	0	0	0	Spring	2011-09-04	September	11:30		Morning
1865	000	1391	No	0	0	56	-56	0	0	0	0	0	0	0	0	0	0	0	0	Spring	2011-09-04	September	12:00		Morning
1866	000	1392	No	0	0	56	-56	0	0	0	0	0	0	0	0	0	0	0	0	Spring	2011-09-04	September	12:30		Morning
1867	000	1393	Yes	4	64	56	8	1	16	0	0	3	0	0	0	0	0	0	1	Spring	2011-09-04	September	13:00	12:55 transit	Afternoon
1868	000	1394	No	0	0	56	-56	0	0	0	0	0	0	0	0	0	0	0	2	Spring	2011-09-04	September	13:30		Afternoon
1869	000	1395	Yes	1	16	56	-40	0	0	0	0	0	0	0	0	1	0	0	3	Spring	2011-09-04	September	14:00		Afternoon
1870	000	1396	Yes	4	64	56	8	3	48	0	0	1	0	0	0	0	0	0	4	Spring	2011-09-04	September	14:30		Afternoon
1871	000	1397	No	0	0	56	-56	0	0	0	0	0	0	0	0	0	0	0	0	Spring	2011-09-04	September	15:00		Afternoon
1872	000	1398	Yes	1	16	56	-40	0	0	0	0	0	0	0	0	0	0	1	2	Spring	2011-09-04	September	15:30		Afternoon
1873	000	1399	No	0	0	56	-56	0	0	0	0	0	0	0	0	0	0	0	3	Spring	2011-09-04	September	16:00		Afternoon
1874	000	1400	No	0	0	56	-56	0	0	0	0	0	0	0	0	0	0	0	0	Spring	2011-09-04	September	16:30		Afternoon
1875	000	1401	Yes	1	16	56	-40	0	0	0	0	0	0	1	0	0	0	0	3	Spring	2011-09-04	September	17:00		Afternoon
1876	000	1402	No	0	0	56	-56	0	0	0	0	0	0	0	0	0	0	0	1	Spring	2011-09-04	September	17:30		Afternoon
1877	000	1403	Yes	24	384	56	328	8	128	9	0	6	0	1	0	0	0	0	11	Spring	2011-09-04	September	18:00		Afternoon
1878	000	1404	Yes	3	48	56	-8	3	48	0	0	0	0	0	0	0	0	0	2	Spring	2011-09-04	September	18:30	18:24 set	Dusk
1879	000	1405	Yes	9	144	56	88	3	48	0	0	1	0	5	0	0	0	0	5	Spring	2011-09-04	September	19:00		Dusk
1880	000	1406	Yes	5	80	56	24	5	80	0	0	0	0	0	0	0	0	0	5	Spring	2011-09-04	September	19:30	19:34 end	Dusk
1881	000	1407	Yes	8	128	56	72	5	80	0	0	2	0	0	1	0	0	0	5	Spring	2011-09-04	September	20:00		Night
1882	000	1408	Yes	15	240	56	184	0	0	0	0	1	0	4	10	0	0	0	4	Spring	2011-09-04	September	20:30		Night
1883	000	1409	Yes	18	288	56	232	4	64	0	0	2	0	4	8	0	0	0	8	Spring	2011-09-04	September	21:00		Night
1884	000	1410	Yes	3	48	56	-8	1	16	0	0	0	0	0	2	0	0	0	3	Spring	2011-09-04	September	21:30		Night
1885	000	1411	Yes	12	192	56	136	0	0	0	0	1	0	1	10	0	0	0	2	Spring	2011-09-04	September	22:00		Night
1886	000	1412	No	0	0	56	-56	0	0	0	0	0	0	0	0	0	0	0	0	Spring	2011-09-04	September	22:30		Night
1887	000	1413	Yes	3	48	56	-8	3	48	0	0	0	0	0	0	0	0	0	4	Spring	2011-09-04	September	23:00		Night
1888	000	1414	No	0	0	56	-56	0	0	0	0	0	0	0	0	0	0	0	2	Spring	2011-09-04	September	23:30		Night
1889	000	1415	Yes	1	16	8	8	0	0	0	0	0	0	1	0	0	0	0	1	Spring	2011-09-05	September	0:00		Night
1890	000	1416	No	0	0	8	-8	0	0	0	0	0	0	0	0	0	0	0	0	Spring	2011-09-05	September	0:30		Night
1891	000	1417	No	0	0	8	-8	0	0	0	0	0	0	0	0	0	0	0	2	Spring	2011-09-05	September	1:00		Night
1892	000	1418	No	0	0	8	-8	0	0	0	0	0	0	0	0	0	0	0	3	Spring	2011-09-05	September	1:30		Night
1893	000	1419	Yes	4	64	8	56	0	0	0	1	3	0	0	0	0	0	0	1	Spring	2011-09-05	September	2:00		Night
1894	000	1420	Yes	13	208	8	200	0	0	0	13	0	0	0	0	0	0	0	1	Spring	2011-09-05	September	2:30		Night
1895	000	1421	Yes	16	256	8	248	1	16	0	14	0	0	0	0	1	0	0	2	Spring	2011-09-05	September	3:00		Night
1896	000	1422	Yes	7	112	8	104	3	48	0	0	4	0	0	0	0	0	0	3	Spring	2011-09-05	September	3:30		Night
1897	000	1423	Yes	6	96	8	88	6	96	0	0	0	0	0	0	0	0	0	7	Spring	2011-09-05	September	4:00		Night
1898	000	1424	Yes	4	64	8	56	4	64	0	0	0	0	0	0	0	0	0	5	Spring	2011-09-05	September	4:30		Night
1899	000	1425	No	0	0	8	-8	0	0	0	0	0	0	0	0	0	0	0	1	Spring	2011-09-05	September	5:00		Night
1900	000	1426	Yes	7	112	8	104	2	32	0	3	2	0	0	0	0	0	0	4	Spring	2011-09-05	September	5:30		Night
1901	000	1427	No	0	0	8	-8	0	0	0	0	0	0	0	0	0	0	0	1	Spring	2011-09-05	September	6:00	6:13 begin	Night
1902	000	1428	Yes	2	32	8	24	2	32	0	0	0	0	0	0	0	0	0	4	Spring	2011-09-05	September	6:30		Dawn
1903	000	1429	Yes	1	16	8	8	0	0	0	0	1	0	0	0	0	0	0	1	Spring	2011-09-05	September	7:00		Dawn
1904	000	1430	No	0	0	8	-8	0	0	0	0	0	0	0	0	0	0	0	1	Spring	2011-09-05	September	7:30	7:23 rise	Morning
1905	000	1431	Yes	6	96	8	88	2	32	0	0	1	0	1	0	0	0	2	2	Spring	2011-09-05	September	8:00		Morning
1906	000	1432	Yes	1	16	8	8	1	16	0	0	0	0	0	0	0	0	0	4	Spring	2011-09-05	September	8:30		Morning
1907	000	1433	Yes	3	48	8	40	0	0	0	0	0	0	3	0	0	0	0	2	Spring	2011-09-05	September	9:00		Morning
1908	000	1434	Yes	3	48	8	40	0	0	0	0	0	0	0	1	0	0	2	1	Spring	2011-09-05	September	9:30		Morning
1909	000	1435	Yes	3	48	8	40	0	0	0	0	0	0	2	0	1	0	0	0	Spring	2011-09-05	September	10:00		Morning
1910	000	1436	Yes	8	128	8	120	2	32	0	0	1	0	2	0	3	0	0	3	Spring	2011-09-05	September	10:30		Morning
1911	000	1437	Yes	8	128	8	120	4	64	0	0	0	0	4	0	0	0	0	6	Spring	2011-09-05	September	11:00		Morning
1912	000	1438	Yes	3	48	8	40	1	16	0	0	2	0	0	0	0	0	0	6	Spring	2011-09-05	September	11:30		Morning
1913	000	1439	Yes	9	144	8	136	5	80	0	0	2	0	2	0	0	0	0	7	Spring	2011-09-05	September	12:00		Morning
1914	000	1440	Yes	1	16	8	8	0	0	0	0	0	0	1	0	0	0	0	2	Spring	2011-09-05	September	12:30		Morning
1915	000	1441	Yes	1	16	8	8	0	0	0	0	1	0	0	0	0	0	0	0	Spring	2011-09-05	September	13:00	12:55 transit	Afternoon
1916	000	1442	Yes	1	16	8	8	0	0	0	0	1	0	0	0	0	0	0	1	Spring	2011-09-05	September	13:30		Afternoon
1917	000	1443	Yes	8	128	8	120	2	32	0	0	4	0	2	0	0	0	0	5	Spring	2011-09-05	September	14:00		Afternoon
1918	000	1444	Yes	1	16	8	8	0	0	0	0	1	0	0	0	0	0	0	4	Spring	2011-09-05	September	14:30		Afternoon
1919	000	1445	Yes	9	144	8	136	6	96	0	0	3	0	0	0	0	0	0	5	Spring	2011-09-05	September	15:00		Afternoon
1920	000	1446	Yes	1	16	8	8	1	16	0	0	0	0	0	0	0	0	0	2	Spring	2011-09-05	September	15:30		Afternoon
1921	000	1447	Yes	2	32	8	24	1	16	0	0	1	0	0	0	0	0	0	4	Spring	2011-09-05	September	16:00		Afternoon
1922	000	1448	No	0	0	8	-8	0	0	0	0	0	0	0	0	0	0	0	2	Spring	2011-09-05	September	16:30		Afternoon
1923	000	1449	Yes	6	96	8	88	1	16	0	0	5	0	0	0	0	0	0	8	Spring	2011-09-05	September	17:00		Afternoon
1924	000	1450	No	0	0	8	-8	0	0	0	0	0	0	0	0	0	0	0	5	Spring	2011-09-05	September	17:30		Afternoon
1925	000	1451	No	0	0	8	-8	0	0	0	0	0	0	0	0	0	0	0	4	Spring	2011-09-05	September	18:00		Afternoon
1926	000	1452	Yes	4	64	8	56	3	48	0	0	1	0	0	0	0	0	0	8	Spring	2011-09-05	September	18:30	18:25 set	Dusk
1927	000	1453	Yes	6	96	8	88	2	32	0	0	0	0	2	0	2	0	0	6	Spring	2011-09-05	September	19:00		Dusk
1928	000	1454	Yes	6	96	8	88	0	0	0	0	6	0	0	0	0	0	0	6	Spring	2011-09-05	September	19:30	19:36 end	Dusk
1929	000	1455	Yes	5	80	8	72	2	32	0	0	3	0	0	0	0	0	0	9	Spring	2011-09-05	September	20:00		Night
1930	000	1456	Yes	2	32	8	24	0	0	0	0	2	0	0	0	0	0	0	2	Spring	2011-09-05	September	20:30		Night
1931	000	1457	Yes	9	144	8	136	8	128	0	0	1	0	0	0	0	0	0	11	Spring	2011-09-05	September	21:00		Night
1932	000	1458	Yes	1	16	8	8	0	0	0	0	1	0	0	0	0	0	0	1	Spring	2011-09-05	September	21:30		Night
1933	000	1459	Yes	4	64	8	56	1	16	0	0	2	0	1	0	0	0	0	4	Spring	2011-09-05	September	22:00		Night
1934	000	1460	Yes	20	320	8	312	4	64	1	0	15	0	0	0	0	0	0	19	Spring	2011-09-05	September	22:30		Night
1935	000	1461	Yes	6	96	8	88	0	0	0	0	0	0	6	0	0	0	0	3	Spring	2011-09-05	September	23:00		Night
1936	000	1462	Yes	19	304	8	296	2	32	0	4	4	0	3	1	3	0	2	4	Spring	2011-09-05	September	23:30		Night
1937	000	1463	Yes	20	320	273.333	46.6667	2	32	0	1	0	0	0	9	5	0	3	7	Spring	2011-09-06	September	0:00		Night
1938	000	1464	Yes	30	480	273.333	206.667	1	16	0	0	2	0	2	16	3	1	5	4	Spring	2011-09-06	September	0:30		Night
1939	000	1465	Yes	18	288	273.333	14.6667	1	16	0	0	0	0	0	14	2	0	1	10	Spring	2011-09-06	September	1:00		Night
1940	000	1466	Yes	8	128	273.333	-145.333	4	64	0	0	0	0	1	0	2	0	1	8	Spring	2011-09-06	September	1:30		Night
1941	000	1467	Yes	1	16	273.333	-257.333	0	0	0	0	0	0	1	0	0	0	0	1	Spring	2011-09-06	September	2:00		Night
1942	000	1468	Yes	3	48	273.333	-225.333	1	16	0	2	0	0	0	0	0	0	0	2	Spring	2011-09-06	September	2:30		Night
1943	000	1469	Yes	6	96	273.333	-177.333	1	16	0	1	4	0	0	0	0	0	0	4	Spring	2011-09-06	September	3:00		Night
1944	000	1470	Yes	18	288	273.333	14.6667	18	288	0	0	0	0	0	0	0	0	0	22	Spring	2011-09-06	September	3:30		Night
1945	000	1471	Yes	45	720	273.333	446.667	45	720	0	0	0	0	0	0	0	0	0	46	Spring	2011-09-06	September	4:00		Night
1946	000	1472	Yes	2	32	273.333	-241.333	0	0	0	0	2	0	0	0	0	0	0	1	Spring	2011-09-06	September	4:30		Night
1947	000	1473	Yes	6	96	273.333	-177.333	6	96	0	0	0	0	0	0	0	0	0	7	Spring	2011-09-06	September	5:00		Night
1948	000	1474	Yes	1	16	273.333	-257.333	1	16	0	0	0	0	0	0	0	0	0	4	Spring	2011-09-06	September	5:30		Night
1949	000	1475	Yes	1	16	273.333	-257.333	0	0	0	0	1	0	0	0	0	0	0	1	Spring	2011-09-06	September	6:00	6:13 begin	Night
1950	000	1476	No	0	0	273.333	-273.333	0	0	0	0	0	0	0	0	0	0	0	11	Spring	2011-09-06	September	6:30		Dawn
1951	000	1477	Yes	1	16	273.333	-257.333	0	0	0	0	1	0	0	0	0	0	0	1	Spring	2011-09-06	September	7:00		Dawn
1952	000	1478	Yes	36	576	273.333	302.667	36	576	0	0	0	0	0	0	0	0	0	39	Spring	2011-09-06	September	7:30	7:23 rise	Morning
1953	000	1479	Yes	12	192	273.333	-81.3333	7	112	0	0	0	0	3	2	0	0	0	1	Spring	2011-09-06	September	8:00		Morning
1954	000	1480	Yes	8	128	273.333	-145.333	2	32	0	0	0	0	3	0	1	2	0	6	Spring	2011-09-06	September	8:30		Morning
1955	000	1481	Yes	16	256	273.333	-17.3333	0	0	0	0	0	0	3	11	2	0	0	1	Spring	2011-09-06	September	9:00		Morning
1956	000	1482	Yes	19	304	273.333	30.6667	7	112	0	0	0	0	6	4	0	1	1	12	Spring	2011-09-06	September	9:30		Morning
1957	000	1483	Yes	19	304	273.333	30.6667	0	0	0	0	3	0	11	5	0	0	0	9	Spring	2011-09-06	September	10:00		Morning
1958	000	1484	Yes	23	368	273.333	94.6667	2	32	0	0	2	0	5	8	0	0	6	5	Spring	2011-09-06	September	10:30		Morning
1959	000	1485	Yes	15	240	273.333	-33.3333	0	0	0	0	0	0	0	13	0	0	2	2	Spring	2011-09-06	September	11:00		Morning
1960	000	1486	Yes	2	32	273.333	-241.333	0	0	0	0	0	0	2	0	0	0	0	3	Spring	2011-09-06	September	11:30		Morning
1961	000	1487	Yes	21	336	273.333	62.6667	2	32	0	10	0	0	7	0	0	0	2	2	Spring	2011-09-06	September	12:00		Morning
1962	000	1488	Yes	39	624	273.333	350.667	3	48	1	8	0	0	6	2	10	0	9	3	Spring	2011-09-06	September	12:30		Morning
1963	000	1489	Yes	3	48	273.333	-225.333	0	0	0	0	0	0	2	0	0	0	1	2	Spring	2011-09-06	September	13:00	12:55 transit	Afternoon
1964	000	1490	Yes	22	352	273.333	78.6667	4	64	1	0	6	0	5	0	4	0	2	7	Spring	2011-09-06	September	13:30		Afternoon
1965	000	1491	Yes	7	112	273.333	-161.333	0	0	0	0	0	0	4	0	3	0	0	1	Spring	2011-09-06	September	14:00		Afternoon
1966	000	1492	Yes	22	352	273.333	78.6667	5	80	1	6	5	0	5	0	0	0	0	9	Spring	2011-09-06	September	14:30		Afternoon
1967	000	1493	Yes	15	240	273.333	-33.3333	11	176	0	1	3	0	0	0	0	0	0	15	Spring	2011-09-06	September	15:00		Afternoon
1968	000	1494	Yes	10	160	273.333	-113.333	1	16	0	4	0	0	1	0	0	0	4	3	Spring	2011-09-06	September	15:30		Afternoon
1969	000	1495	Yes	10	160	273.333	-113.333	6	96	0	0	2	0	0	0	2	0	0	9	Spring	2011-09-06	September	16:00		Afternoon
1970	000	1496	Yes	31	496	273.333	222.667	0	0	2	0	0	0	15	5	8	0	1	6	Spring	2011-09-06	September	16:30		Afternoon
1971	000	1497	Yes	20	320	273.333	46.6667	2	32	1	0	3	0	6	0	3	0	5	7	Spring	2011-09-06	September	17:00		Afternoon
1972	000	1498	Yes	15	240	273.333	-33.3333	1	16	0	0	0	0	10	0	0	0	4	8	Spring	2011-09-06	September	17:30		Afternoon
1973	000	1499	Yes	6	96	273.333	-177.333	0	0	0	0	0	0	5	0	1	0	0	2	Spring	2011-09-06	September	18:00		Afternoon
1974	000	1500	Yes	16	256	273.333	-17.3333	0	0	1	0	2	0	10	0	0	0	3	3	Spring	2011-09-06	September	18:30	18:27 set	Dusk
1975	000	1501	Yes	5	80	273.333	-193.333	0	0	0	0	0	0	4	0	1	0	0	1	Spring	2011-09-06	September	19:00		Dusk
1976	000	1502	Yes	17	272	273.333	-1.33333	4	64	0	0	5	0	4	0	0	0	4	16	Spring	2011-09-06	September	19:30	19:37 end	Dusk
1977	000	1503	Yes	30	480	273.333	206.667	12	192	0	0	1	0	6	6	1	0	4	12	Spring	2011-09-06	September	20:00		Night
1978	000	1504	Yes	37	592	273.333	318.667	7	112	1	5	5	0	7	1	3	0	8	14	Spring	2011-09-06	September	20:30		Night
1979	000	1505	Yes	20	320	273.333	46.6667	7	112	0	2	5	0	5	0	0	0	1	5	Spring	2011-09-06	September	21:00		Night
1980	000	1506	Yes	21	336	273.333	62.6667	7	112	0	4	0	0	4	0	1	0	5	9	Spring	2011-09-06	September	21:30		Night
1981	000	1507	Yes	34	544	273.333	270.667	11	176	0	1	12	0	5	0	1	1	3	27	Spring	2011-09-06	September	22:00		Night
1982	000	1508	Yes	29	464	273.333	190.667	5	80	0	4	5	0	4	3	1	1	6	6	Spring	2011-09-06	September	22:30		Night
1983	000	1509	Yes	35	560	273.333	286.667	14	224	0	0	7	0	10	3	1	0	0	28	Spring	2011-09-06	September	23:00		Night
1984	000	1510	Yes	45	720	273.333	446.667	13	208	3	0	11	0	12	0	0	0	6	29	Spring	2011-09-06	September	23:30		Night
1985	000	1511	Yes	2	32	216	-184	1	16	0	0	0	0	0	0	0	0	1	3	Spring	2011-09-07	September	0:00		Night
1986	000	1512	Yes	25	400	216	184	11	176	6	0	5	0	3	0	0	0	0	12	Spring	2011-09-07	September	0:30		Night
1987	000	1513	Yes	9	144	216	-72	0	0	0	7	2	0	0	0	0	0	0	0	Spring	2011-09-07	September	1:00		Night
1988	000	1514	Yes	40	640	216	424	6	96	0	5	11	0	18	0	0	0	0	11	Spring	2011-09-07	September	1:30		Night
1989	000	1515	Yes	16	256	216	40	0	0	4	0	5	0	2	0	0	3	2	8	Spring	2011-09-07	September	2:00		Night
1990	000	1516	Yes	55	880	216	664	3	48	2	0	27	0	12	0	3	0	8	9	Spring	2011-09-07	September	2:30		Night
1991	000	1517	Yes	23	368	216	152	2	32	1	4	8	0	4	0	0	0	4	7	Spring	2011-09-07	September	3:00		Night
1992	000	1518	Yes	17	272	216	56	3	48	0	0	6	0	8	0	0	0	0	6	Spring	2011-09-07	September	3:30		Night
1993	000	1519	Yes	20	320	216	104	0	0	0	1	10	0	0	0	2	0	7	5	Spring	2011-09-07	September	4:00		Night
1994	000	1520	Yes	27	432	216	216	1	16	4	0	8	0	11	0	2	0	1	6	Spring	2011-09-07	September	4:30		Night
1995	000	1521	Yes	28	448	216	232	1	16	0	3	13	0	6	0	0	0	5	5	Spring	2011-09-07	September	5:00		Night
1996	000	1522	Yes	35	560	216	344	21	336	0	0	2	0	9	0	0	0	3	16	Spring	2011-09-07	September	5:30		Night
1997	000	1523	Yes	2	32	216	-184	1	16	0	0	0	0	1	0	0	0	0	3	Spring	2011-09-07	September	6:00	6:09 begin	Night
1998	000	1524	Yes	42	672	216	456	2	32	1	1	8	0	15	6	5	0	4	11	Spring	2011-09-07	September	6:30		Dawn
1999	000	1525	Yes	34	544	216	328	6	96	0	1	16	0	5	5	1	0	0	9	Spring	2011-09-07	September	7:00		Dawn
2000	000	1526	Yes	1	16	216	-200	1	16	0	0	0	0	0	0	0	0	0	7	Spring	2011-09-07	September	7:30	7:19 rise	Morning
[truncated: 12,433 more rows]

## Sheet: Seasonal
Mean seasonal call rate					Mean seasonal upcall rate
Month	Mean call rate	Stdev	SE		Mean upcall rate	Stdev	SE
Winter	219.162	200.041	4.85886		64.4956	81.1484	1.97104
Spring	41.0261	96.4515	1.45971		15.4869	47.8584	0.724296
Summer	0.168498	4.07678	0.0616844		0.139194	3.36945	0.0509821
Autumn	11.7472	54.9173	0.867994		5.10417	27.4456	0.433791

## Sheet: Monthly
Monthly presence/absence				Mean monthly call rate					Mean monthly upcall rate
				Month	Mean calls per hr	Stdev	SE		Mean upcalls per hr	Stdev	SE
July	Yes			July	193.854	176.776	8.30565		75.9205	86.4147	4.06012
Aug	Yes			Aug	228.393	207.178	5.87872		60.3285	78.7651	2.23498
Sept	Yes			Sept	90.8003	138.11	3.64331		30.2853	65.6466	1.73175
Oct	Yes			Oct	27.2612	66.544	1.72449		12.368	41.9796	1.0879
Nov	Yes			Nov	5.58889	26.0528	0.686551		3.94444	15.3365	0.404151
Dec	Yes			Dec	0.473118	6.92679	0.179569		0.387097	5.70616	0.147925
Jan	No			Jan	0	0	0		0	0	0
Feb	Yes			Feb	0.0229885	0.85769	0.0229885		0.0229885	0.85769	0.0229885
Mar	Yes			Mar	0.288889	7.2263	0.19043		0.211111	5.14419	0.135561
Apr	Yes			Apr	0.522222	9.57612	0.252353		0.477778	9.00403	0.237277
May	Yes			May	40.8335	96.9315	2.89251		17.3108	48.3893	1.44397
June	Yes?			June
Diel cycle
Dawn
Morning
Afternoon
Dusk
Night

## Sheet: Calls per day
Calls per day	Upcalls per day	Date	Proportion (%)
222.857	89.1429	2011-07-22	40
198.5	81.5	2011-07-23	41.0579
294	112	2011-07-24	38.0952
243	118	2011-07-25	48.5597
160.5	78.5	2011-07-26	48.9097
161.5	82	2011-07-27	50.774
239.5	44	2011-07-28	18.3716
234.5	51.5	2011-07-29	21.9616
128	69	2011-07-30	53.9062
72.5	41	2011-07-31	56.5517
169.043	70.9565	2011-08-01	41.9753
0	0	2011-08-02
0	0	2011-08-03
0	0	2011-08-04
0	0	2011-08-05
512	88.4211	2011-08-06	17.2697
283.667	111.333	2011-08-07	39.2479
143	37	2011-08-08	25.8741
89.3333	26	2011-08-09	29.1045
104.333	47.3333	2011-08-10	45.3674
361	59.3333	2011-08-11	16.4358
298	49.6667	2011-08-12	16.6667
258.667	122	2011-08-13	47.1649
104	45.6667	2011-08-14	43.9103
251	36.6667	2011-08-15	14.6082
282	45	2011-08-16	15.9574
233.333	44	2011-08-17	18.8571
356.667	72.6667	2011-08-18	20.3738
445.667	118.667	2011-08-19	26.6268
145.667	51.3333	2011-08-20	35.2403
323.667	75.3333	2011-08-21	23.275
207.333	87.3333	2011-08-22	42.1222
111	70	2011-08-23	63.0631
199.333	77.3333	2011-08-24	38.796
121.333	121.333	2011-08-25	100
299.333	80.6667	2011-08-26	26.9488
263.667	48	2011-08-27	18.2048
100.667	28	2011-08-28	27.8146
219.333	41.3333	2011-08-29	18.845
267.333	37.6667	2011-08-30	14.0898
156.667	42	2011-08-31	26.8085
85.6667	31	2011-09-01	36.1868
80.3333	34	2011-09-02	42.3237
31.6667	16	2011-09-03	50.5263
70.3333	19	2011-09-04	27.0142
72.3333	22	2011-09-05	30.4147
273.333	83	2011-09-06	30.3659
206	48	2011-09-07	23.301
135.667	19.6667	2011-09-08	14.4963
97	38	2011-09-09	39.1753
110.667	28.6667	2011-09-10	25.9036
153	45	2011-09-11	29.4118
204	61	2011-09-12	29.902
115.333	27	2011-09-13	23.4104
137.333	33.3333	2011-09-14	24.2718
79.3333	23.3333	2011-09-15	29.4118
75	21.6667	2011-09-16	28.8889
46.3333	11	2011-09-17	23.741
60.3333	23.3333	2011-09-18	38.674
82	35.6667	2011-09-19	43.4959
94	62	2011-09-20	65.9574
118.333	40.6667	2011-09-21	34.3662
92.3333	26.6667	2011-09-22	28.8809
76.3333	49	2011-09-23	64.1921
91.6667	38	2011-09-24	41.4545
35.8261	21.5652	2011-09-25	60.1942
5	3	2011-09-26	60
4.66667	2.66667	2011-09-27	57.1429
18.6667	7.33333	2011-09-28	39.2857
47.3333	23	2011-09-29	48.5915
0	0	2011-09-30
0	0	2011-10-01
18.3333	7.33333	2011-10-02	40
39	21.6667	2011-10-03	55.5556
87	26	2011-10-04	29.8851
25.6667	8.33333	2011-10-05	32.4675
1	0.333333	2011-10-06	33.3333
1	0	2011-10-07
33	1.33333	2011-10-08	4.0404
111.333	24.6667	2011-10-09	22.1557
18	6.33333	2011-10-10	35.1852
10.3333	8	2011-10-11	77.4194
2.33333	1	2011-10-12	42.8571
6	3.66667	2011-10-13	61.1111
26	3.66667	2011-10-14	14.1026
13.3333	4.33333	2011-10-15	32.5
7	1.33333	2011-10-16	19.0476
0	0	2011-10-17
4.33333	1.33333	2011-10-18	30.7692
12	2.66667	2011-10-19	22.2222
6	5	2011-10-20	83.3333
7.33333	5.66667	2011-10-21	77.2727
31	14.3333	2011-10-22	46.2366
38	24	2011-10-23	63.1579
67	36	2011-10-24	53.7313
123.333	75.3333	2011-10-25	61.0811
41	23.6667	2011-10-26	57.7236
33.6667	25.6667	2011-10-27	76.2376
17.6667	10.6667	2011-10-28	60.3774
8.33333	4	2011-10-29	48
51.3333	37	2011-10-30	72.0779
5.33333	0.333333	2011-10-31	6.25
13.3333	2.66667	2011-11-01	20
3.66667	0.666667	2011-11-02	18.1818
18.6667	17	2011-11-03	91.0714
7.66667	4.66667	2011-11-04	60.8696
0.666667	0	2011-11-05
2.33333	0	2011-11-06
10	7.33333	2011-11-07	73.3333
12	10.6667	2011-11-08	88.8889
1.33333	1.33333	2011-11-09	100
6	5.33333	2011-11-10	88.8889
12.6667	11.3333	2011-11-11	89.4737
5.66667	3.66667	2011-11-12	64.7059
13.3333	8.33333	2011-11-13	62.5
25	18.6667	2011-11-14	74.6667
6.66667	3	2011-11-15	45
2	2	2011-11-16	100
5.66667	5.66667	2011-11-17	100
4.66667	4.66667	2011-11-18	100
6	5.33333	2011-11-19	88.8889
0	0	2011-11-20
0	0	2011-11-21
0	0	2011-11-22
0	0	2011-11-23
0	0	2011-11-24
0	0	2011-11-25
0	0	2011-11-26
0	0	2011-11-27
1.33333	0	2011-11-28
4	1.66667	2011-11-29	41.6667
5	4.33333	2011-11-30	86.6667
6.66667	6.33333	2011-12-01	95
0	0	2011-12-02
0	0	2011-12-03
0	0	2011-12-04
0	0	2011-12-05
0	0	2011-12-06
0	0	2011-12-07
0	0	2011-12-08
0	0	2011-12-09
0	0	2011-12-10
0	0	2011-12-11
0	0	2011-12-12
0	0	2011-12-13
0	0	2011-12-14
0	0	2011-12-15
0	0	2011-12-16
0	0	2011-12-17
0	0	2011-12-18
0	0	2011-12-19
0	0	2011-12-20
0	0	2011-12-21
0	0	2011-12-22
1.66667	1.66667	2011-12-23	100
6.33333	4	2011-12-24	63.1579
0	0	2011-12-25
0	0	2011-12-26
0	0	2011-12-27
0	0	2011-12-28
0	0	2011-12-29
0	0	2011-12-30
0	0	2011-12-31
0	0	2012-01-01
0	0	2012-01-02
0	0	2012-01-03
0	0	2012-01-04
0	0	2012-01-05
0	0	2012-01-06
0	0	2012-01-07
0	0	2012-01-08
0	0	2012-01-09
0	0	2012-01-10
0	0	2012-01-11
0	0	2012-01-12
0	0	2012-01-13
0	0	2012-01-14
0	0	2012-01-15
0	0	2012-01-16
0	0	2012-01-17
0	0	2012-01-18
0	0	2012-01-19
0	0	2012-01-20
0	0	2012-01-21
0	0	2012-01-22
0	0	2012-01-23
0	0	2012-01-24
0	0	2012-01-25
0	0	2012-01-26
0	0	2012-01-27
0	0	2012-01-28
0	0	2012-01-29
0	0	2012-01-30
0	0	2012-01-31
0	0	2012-02-01
0	0	2012-02-02
0	0	2012-02-03
0	0	2012-02-04
0	0	2012-02-05
0	0	2012-02-06
0	0	2012-02-07
0	0	2012-02-08
0	0	2012-02-09
0	0	2012-02-10
0	0	2012-02-11
0	0	2012-02-12
0	0	2012-02-13
0	0	2012-02-14
0	0	2012-02-15
0	0	2012-02-16
0	0	2012-02-17
0	0	2012-02-18
0	0	2012-02-19
0	0	2012-02-20
0	0	2012-02-21
0	0	2012-02-22
0	0	2012-02-23
0	0	2012-02-24
0	0	2012-02-25
0.666667	0.666667	2012-02-26	100
0	0	2012-02-27
0	0	2012-02-28
0	0	2012-02-29
0	0	2012-03-02
0	0	2012-03-03
0	0	2012-03-04
0	0	2012-03-05
0	0	2012-03-06
0	0	2012-03-07
0	0	2012-03-08
0	0	2012-03-09
0	0	2012-03-10
0	0	2012-03-11
0	0	2012-03-12
0	0	2012-03-13
0	0	2012-03-14
0	0	2012-03-15
0	0	2012-03-16
0	0	2012-03-17
0	0	2012-03-18
0	0	2012-03-19
8.66667	0	2012-03-20
0	0	2012-03-21
0	0	2012-03-22
0	0	2012-03-23
0	0	2012-03-24
0	0	2012-03-25
0	0	2012-03-26
0	0	2012-03-27
0	0	2012-03-28
0	0	2012-03-29
0	0	2012-03-30
0	0	2012-03-31
0	0	2012-04-01
0	0	2012-04-02
0	0	2012-04-03
0	0	2012-04-04
0	0	2012-04-05
5.66667	0	2012-04-06
0.333333	0	2012-04-07
0	0	2012-04-08
0	0	2012-04-09
0	0	2012-04-10
0	0	2012-04-11
0	0	2012-04-12
0	0	2012-04-13
0	0	2012-04-14
8	0	2012-04-15
0	0	2012-04-16
0	0	2012-04-17
0	0	2012-04-18
0	0	2012-04-19
0	0	2012-04-20
0	0	2012-04-21
0.333333	0	2012-04-22	0
0	0	2012-04-23
1.33333	1	2012-04-24	75
0	0	2012-04-25
0	0	2012-04-26
0	0	2012-04-27
0	0	2012-04-28
0	0	2012-04-29
0	0	2012-04-30
0	0	2012-05-01
0	0	2012-05-02
0	0	2012-05-03
1.66667	1.33333	2012-05-04	80
9.33333	7	2012-05-05	75
13	8.66667	2012-05-06	66.6667
1.66667	1.33333	2012-05-07	80
0	0	2012-05-08
1.66667	0.333333	2012-05-09	20
23	10.6667	2012-05-10	46.3768
0	0	2012-05-11
3.66667	2.33333	2012-05-12	63.6364
14.6667	7	2012-05-13	47.7273
54.6667	12.6667	2012-05-14	23.1707
26.6667	25.3333	2012-05-15	95
22	15.6667	2012-05-16	71.2121
47.3333	25.6667	2012-05-17	54.2254
37.6667	19	2012-05-18	50.4425
53.3333	14.6667	2012-05-19	27.5
72.3333	26.3333	2012-05-20	36.4055
63.3333	30.3333	2012-05-21	47.8947
174.333	60.6667	2012-05-22	34.7992
267	116.333	2012-05-23	43.5705
171.789	49.6842	2012-05-24	28.9216

## Sheet: Days of presence
Calls per day	Upcalls per day	Date			Month	No of days w calls	No of recording days	Days presence (%)
222.857	89.1429	2011-07-22			July	10	10	100
198.5	81.5	2011-07-23			Aug	27	27	100
294	112	2011-07-24			Sept	29	30	96.6667
243	118	2011-07-25			Oct	29	31	93.5484
160.5	78.5	2011-07-26			Nov	22	30	73.3333
161.5	82	2011-07-27			Dec	3	31	9.67742
239.5	44	2011-07-28			Jan	0	31	0
234.5	51.5	2011-07-29			Feb	1	29	3.44828
128	69	2011-07-30			Mar	1	30	3.33333
72.5	41	2011-07-31			Apr	5	30	16.6667
169.043	70.9565	2011-08-01			May	19	24	79.1667
0	0	2011-08-02
0	0	2011-08-03
0	0	2011-08-04
0	0	2011-08-05
512	88.4211	2011-08-06
283.667	111.333	2011-08-07
143	37	2011-08-08
89.3333	26	2011-08-09
104.333	47.3333	2011-08-10
361	59.3333	2011-08-11
298	49.6667	2011-08-12
258.667	122	2011-08-13
104	45.6667	2011-08-14
251	36.6667	2011-08-15
282	45	2011-08-16
233.333	44	2011-08-17
356.667	72.6667	2011-08-18
445.667	118.667	2011-08-19
145.667	51.3333	2011-08-20
323.667	75.3333	2011-08-21
207.333	87.3333	2011-08-22
111	70	2011-08-23
199.333	77.3333	2011-08-24
121.333	121.333	2011-08-25
299.333	80.6667	2011-08-26
263.667	48	2011-08-27
100.667	28	2011-08-28
219.333	41.3333	2011-08-29
267.333	37.6667	2011-08-30
156.667	42	2011-08-31
85.6667	31	2011-09-01
80.3333	34	2011-09-02
31.6667	16	2011-09-03
70.3333	19	2011-09-04
72.3333	22	2011-09-05
273.333	83	2011-09-06
206	48	2011-09-07
135.667	19.6667	2011-09-08
97	38	2011-09-09
110.667	28.6667	2011-09-10
153	45	2011-09-11
204	61	2011-09-12
115.333	27	2011-09-13
137.333	33.3333	2011-09-14
79.3333	23.3333	2011-09-15
75	21.6667	2011-09-16
46.3333	11	2011-09-17
60.3333	23.3333	2011-09-18
82	35.6667	2011-09-19
94	62	2011-09-20
118.333	40.6667	2011-09-21
92.3333	26.6667	2011-09-22
76.3333	49	2011-09-23
91.6667	38	2011-09-24
35.8261	21.5652	2011-09-25
5	3	2011-09-26
4.66667	2.66667	2011-09-27
18.6667	7.33333	2011-09-28
47.3333	23	2011-09-29
0	0	2011-09-30
0	0	2011-10-01
18.3333	7.33333	2011-10-02
39	21.6667	2011-10-03
87	26	2011-10-04
25.6667	8.33333	2011-10-05
1	0.333333	2011-10-06
1	0	2011-10-07
33	1.33333	2011-10-08
111.333	24.6667	2011-10-09
18	6.33333	2011-10-10
10.3333	8	2011-10-11
2.33333	1	2011-10-12
6	3.66667	2011-10-13
26	3.66667	2011-10-14
13.3333	4.33333	2011-10-15
7	1.33333	2011-10-16
0	0	2011-10-17
4.33333	1.33333	2011-10-18
12	2.66667	2011-10-19
6	5	2011-10-20
7.33333	5.66667	2011-10-21
31	14.3333	2011-10-22
38	24	2011-10-23
67	36	2011-10-24
123.333	75.3333	2011-10-25
41	23.6667	2011-10-26
33.6667	25.6667	2011-10-27
17.6667	10.6667	2011-10-28
8.33333	4	2011-10-29
51.3333	37	2011-10-30
5.33333	0.333333	2011-10-31
13.3333	2.66667	2011-11-01
3.66667	0.666667	2011-11-02
18.6667	17	2011-11-03
7.66667	4.66667	2011-11-04
0.666667	0	2011-11-05
2.33333	0	2011-11-06
10	7.33333	2011-11-07
12	10.6667	2011-11-08
1.33333	1.33333	2011-11-09
6	5.33333	2011-11-10
12.6667	11.3333	2011-11-11
5.66667	3.66667	2011-11-12
13.3333	8.33333	2011-11-13
25	18.6667	2011-11-14
6.66667	3	2011-11-15
2	2	2011-11-16
5.66667	5.66667	2011-11-17
4.66667	4.66667	2011-11-18
6	5.33333	2011-11-19
0	0	2011-11-20
0	0	2011-11-21
0	0	2011-11-22
0	0	2011-11-23
0	0	2011-11-24
0	0	2011-11-25
0	0	2011-11-26
0	0	2011-11-27
1.33333	0	2011-11-28
4	1.66667	2011-11-29
5	4.33333	2011-11-30
6.66667	6.33333	2011-12-01
0	0	2011-12-02
0	0	2011-12-03
0	0	2011-12-04
0	0	2011-12-05
0	0	2011-12-06
0	0	2011-12-07
0	0	2011-12-08
0	0	2011-12-09
0	0	2011-12-10
0	0	2011-12-11
0	0	2011-12-12
0	0	2011-12-13
0	0	2011-12-14
0	0	2011-12-15
0	0	2011-12-16
0	0	2011-12-17
0	0	2011-12-18
0	0	2011-12-19
0	0	2011-12-20
0	0	2011-12-21
0	0	2011-12-22
1.66667	1.66667	2011-12-23
6.33333	4	2011-12-24
0	0	2011-12-25
0	0	2011-12-26
0	0	2011-12-27
0	0	2011-12-28
0	0	2011-12-29
0	0	2011-12-30
0	0	2011-12-31
0	0	2012-01-01
0	0	2012-01-02
0	0	2012-01-03
0	0	2012-01-04
0	0	2012-01-05
0	0	2012-01-06
0	0	2012-01-07
0	0	2012-01-08
0	0	2012-01-09
0	0	2012-01-10
0	0	2012-01-11
0	0	2012-01-12
0	0	2012-01-13
0	0	2012-01-14
0	0	2012-01-15
0	0	2012-01-16
0	0	2012-01-17
0	0	2012-01-18
0	0	2012-01-19
0	0	2012-01-20
0	0	2012-01-21
0	0	2012-01-22
0	0	2012-01-23
0	0	2012-01-24
0	0	2012-01-25
0	0	2012-01-26
0	0	2012-01-27
0	0	2012-01-28
0	0	2012-01-29
0	0	2012-01-30
0	0	2012-01-31
0	0	2012-02-01
0	0	2012-02-02
0	0	2012-02-03
0	0	2012-02-04
0	0	2012-02-05
0	0	2012-02-06
0	0	2012-02-07
0	0	2012-02-08
0	0	2012-02-09
0	0	2012-02-10
0	0	2012-02-11
0	0	2012-02-12
0	0	2012-02-13
0	0	2012-02-14
0	0	2012-02-15
0	0	2012-02-16
0	0	2012-02-17
0	0	2012-02-18
0	0	2012-02-19
0	0	2012-02-20
0	0	2012-02-21
0	0	2012-02-22
0	0	2012-02-23
0	0	2012-02-24
0	0	2012-02-25
0.666667	0.666667	2012-02-26
0	0	2012-02-27
0	0	2012-02-28
0	0	2012-02-29
0	0	2012-03-02
0	0	2012-03-03
0	0	2012-03-04
0	0	2012-03-05
0	0	2012-03-06
0	0	2012-03-07
0	0	2012-03-08
0	0	2012-03-09
0	0	2012-03-10
0	0	2012-03-11
0	0	2012-03-12
0	0	2012-03-13
0	0	2012-03-14
0	0	2012-03-15
0	0	2012-03-16
0	0	2012-03-17
0	0	2012-03-18
0	0	2012-03-19
8.66667	0	2012-03-20
0	0	2012-03-21
0	0	2012-03-22
0	0	2012-03-23
0	0	2012-03-24
0	0	2012-03-25
0	0	2012-03-26
0	0	2012-03-27
0	0	2012-03-28
0	0	2012-03-29
0	0	2012-03-30
0	0	2012-03-31
0	0	2012-04-01
0	0	2012-04-02
0	0	2012-04-03
0	0	2012-04-04
0	0	2012-04-05
5.66667	0	2012-04-06
0.333333	0	2012-04-07
0	0	2012-04-08
0	0	2012-04-09
0	0	2012-04-10
0	0	2012-04-11
0	0	2012-04-12
0	0	2012-04-13
0	0	2012-04-14
8	0	2012-04-15
0	0	2012-04-16
0	0	2012-04-17
0	0	2012-04-18
0	0	2012-04-19
0	0	2012-04-20
0	0	2012-04-21
0.333333	0	2012-04-22
0	0	2012-04-23
1.33333	1	2012-04-24
0	0	2012-04-25
0	0	2012-04-26
0	0	2012-04-27
0	0	2012-04-28
0	0	2012-04-29
0	0	2012-04-30
0	0	2012-05-01
0	0	2012-05-02
0	0	2012-05-03
1.66667	1.33333	2012-05-04
9.33333	7	2012-05-05
13	8.66667	2012-05-06
1.66667	1.33333	2012-05-07
0	0	2012-05-08
1.66667	0.333333	2012-05-09
23	10.6667	2012-05-10
0	0	2012-05-11
3.66667	2.33333	2012-05-12
14.6667	7	2012-05-13
54.6667	12.6667	2012-05-14
26.6667	25.3333	2012-05-15
22	15.6667	2012-05-16
47.3333	25.6667	2012-05-17
37.6667	19	2012-05-18
53.3333	14.6667	2012-05-19
72.3333	26.3333	2012-05-20
63.3333	30.3333	2012-05-21
174.333	60.6667	2012-05-22
267	116.333	2012-05-23
171.789	49.6842	2012-05-24

## Sheet: Diel period
Line	Date	DielPeriod	NoOfCalls	TotalCallsInPeriod	NoOfRecordings	CallsPerHr	MeanCalls24hPeriod	MeanAdjusted	Season	CallPresence
1	2011-07-22	Afternoon	28	1656	8	207	222.9	-15.9	Winter	1		MAKE SURE SORT SPREADSHEET BEFORE THIS WORKS
6	2011-07-23	Afternoon	80	1920	9	213.333	198.5	14.8333	Winter	1		Diel period	MeanCalls	SD	SE	MeanAdjCalls	SD	SE
11	2011-07-24	Afternoon	77	1848	9	205.333	294	-88.6667	Winter	1		Dawn	33.1728	83.0186	4.78511	-9.20066	64.1427	3.69712
16	2011-07-25	Afternoon	60	1440	9	160	243	-83	Winter	1		Morning	29.2143	65.6826	3.78588	-13.1591	48.3708	2.78804
21	2011-07-26	Afternoon	52	1248	9	138.667	160.5	-21.8333	Winter	1		Afternoon	35.7144	77.1411	4.44634	-7.96835	45.7936	2.6395
26	2011-07-27	Afternoon	38	912	9	101.333	161.5	-60.1667	Winter	1		Dusk	53.0986	118.105	6.80749	9.41584	68.6565	3.95729
31	2011-07-28	Afternoon	111	2664	9	296	239.5	56.5	Winter	1		Night	49.3026	100.534	5.78506	5.76456	52.6929	3.03214
36	2011-07-29	Afternoon	35	840	9	93.3333	234.5	-141.167	Winter	1
41	2011-07-30	Afternoon	31	744	9	82.6667	128	-45.3333	Winter	1
46	2011-07-31	Afternoon	14	336	9	37.3333	72.5	-35.1667	Winter	1
51	2011-08-06	Afternoon	130	2080	7	297.143	512	-214.857	Winter	1
56	2011-08-07	Afternoon	84	1344	10	134.4	283.7	-149.3	Winter	1
61	2011-08-08	Afternoon	97	1552	10	155.2	143	12.2	Winter	1
66	2011-08-09	Afternoon	24	384	10	38.4	89.3	-50.9	Winter	1
71	2011-08-10	Afternoon	63	1008	10	100.8	64	36.8	Winter	1
76	2011-08-11	Afternoon	211	3376	10	337.6	361	-23.4	Winter	1
81	2011-08-12	Afternoon	152	2432	12	202.667	298	-95.3333	Winter	1
86	2011-08-13	Afternoon	81	1296	10	129.6	258.7	-129.1	Winter	1
91	2011-08-14	Afternoon	39	624	10	62.4	104	-41.6	Winter	1
96	2011-08-15	Afternoon	238	3808	10	380.8	152	228.8	Winter	1
101	2011-08-16	Afternoon	114	1824	10	182.4	282	-99.6	Winter	1
106	2011-08-17	Afternoon	159	2544	10	254.4	233.3	21.1	Winter	1
111	2011-08-18	Afternoon	207	3312	10	331.2	356.7	-25.5	Winter	1
116	2011-08-19	Afternoon	219	3504	10	350.4	445.7	-95.3	Winter	1
121	2011-08-20	Afternoon	91	1456	10	145.6	145.7	-0.1	Winter	1
126	2011-08-21	Afternoon	186	2976	11	270.545	323.7	-53.1545	Winter	1
131	2011-08-22	Afternoon	175	2800	10	280	207.3	72.7	Winter	1
136	2011-08-23	Afternoon	44	704	11	64	111	-47	Winter	1
141	2011-08-24	Afternoon	242	3872	11	352	199.3	152.7	Winter	1
146	2011-08-25	Afternoon	58	928	11	84.3636	72	12.3636	Winter	1
151	2011-08-26	Afternoon	265	4240	11	385.455	299.3	86.1545	Winter	1
156	2011-08-27	Afternoon	189	3024	11	274.909	263.7	11.2091	Winter	1
161	2011-08-28	Afternoon	69	1104	11	100.364	100.7	-0.336364	Winter	1
166	2011-08-29	Afternoon	142	2272	11	206.545	219.3	-12.7545	Winter	1
171	2011-08-30	Afternoon	154	2464	11	224	267.3	-43.3	Winter	1
176	2011-08-31	Afternoon	111	1776	11	161.455	156.7	4.75455	Winter	1
181	2011-09-01	Afternoon	25	400	11	36.3636	85.7	-49.3364	Spring	1
186	2011-09-02	Afternoon	17	272	11	24.7273	80.3	-55.5727	Spring	1
191	2011-09-03	Afternoon	0	0	11	0	31.7	-31.7	Spring	0
196	2011-09-04	Afternoon	35	560	11	50.9091	56	-5.09091	Spring	1
201	2011-09-05	Afternoon	29	464	11	42.1818	8	34.1818	Spring	1
206	2011-09-06	Afternoon	161	2576	11	234.182	273.3	-39.1182	Spring	1
211	2011-09-07	Afternoon	121	1936	11	176	216	-40	Spring	1
216	2011-09-08	Afternoon	56	896	11	81.4545	135.7	-54.2455	Spring	1
221	2011-09-09	Afternoon	89	1424	11	129.455	97	32.4545	Spring	1
226	2011-09-10	Afternoon	103	1648	12	137.333	110.7	26.6333	Spring	1
231	2011-09-11	Afternoon	91	1456	12	121.333	360	-238.667	Spring	1
236	2011-09-12	Afternoon	89	1424	12	118.667	204	-85.3333	Spring	1
241	2011-09-13	Afternoon	47	752	12	62.6667	115.3	-52.6333	Spring	1
246	2011-09-14	Afternoon	197	3152	12	262.667	137.3	125.367	Spring	1
251	2011-09-15	Afternoon	31	496	12	41.3333	79.3	-37.9667	Spring	1
256	2011-09-16	Afternoon	3	48	12	4	75	-71	Spring	1
261	2011-09-17	Afternoon	15	240	12	20	46.3	-26.3	Spring	1
266	2011-09-18	Afternoon	18	288	12	24	60.3	-36.3	Spring	1
271	2011-09-19	Afternoon	29	464	12	38.6667	82	-43.3333	Spring	1
276	2011-09-20	Afternoon	58	928	12	77.3333	544	-466.667	Spring	1
281	2011-09-21	Afternoon	58	928	12	77.3333	118.3	-40.9667	Spring	1
286	2011-09-22	Afternoon	34	544	12	45.3333	92.3	-46.9667	Spring	1
291	2011-09-23	Afternoon	86	1376	12	114.667	76.3	38.3667	Spring	1
296	2011-09-24	Afternoon	37	592	12	49.3333	91.7	-42.3667	Spring	1
301	2011-09-25	Afternoon	30	480	12	40	35.8	4.2	Spring	1
306	2011-09-26	Afternoon	1	16	12	1.33333	32	-30.6667	Spring	1
311	2011-09-27	Afternoon	12	192	12	16	4.6	11.4	Spring	1
316	2011-09-28	Afternoon	0	0	12	0	18.7	-18.7	Spring	0
321	2011-09-29	Afternoon	20	320	12	26.6667	47.3	-20.6333	Spring	1
326	2011-09-30	Afternoon	33	528	13	40.6154	20	20.6154	Spring	1
331	2011-10-01	Afternoon	0	0	13	0	0	0	Spring	0
336	2011-10-02	Afternoon	16	256	13	19.6923	18.3	1.39231	Spring	1
341	2011-10-03	Afternoon	21	336	13	25.8462	39	-13.1538	Spring	1
346	2011-10-04	Afternoon	70	1120	13	86.1538	87	-0.846154	Spring	1
351	2011-10-05	Afternoon	16	256	13	19.6923	25.7	-6.00769	Spring	1
356	2011-10-06	Afternoon	0	0	13	0	1	-1	Spring	0
361	2011-10-07	Afternoon	0	0	13	0	1	-1	Spring	0
366	2011-10-08	Afternoon	23	368	13	28.3077	8	20.3077	Spring	1
371	2011-10-09	Afternoon	144	2304	13	177.231	111.3	65.9308	Spring	1
376	2011-10-10	Afternoon	9	144	13	11.0769	18	-6.92308	Spring	1
381	2011-10-11	Afternoon	2	32	13	2.46154	10.3	-7.83846	Spring	1
386	2011-10-12	Afternoon	4	64	13	4.92308	2.3	2.62308	Spring	1
391	2011-10-13	Afternoon	11	176	13	13.5385	6	7.53846	Spring	1
396	2011-10-14	Afternoon	4	64	13	4.92308	26	-21.0769	Spring	1
401	2011-10-15	Afternoon	21	336	12	28	13.3	14.7	Spring	1
406	2011-10-16	Afternoon	6	96	12	8	7	1	Spring	1
411	2011-10-17	Afternoon	0	0	12	0	0	0	Spring	0
416	2011-10-18	Afternoon	4	64	13	4.92308	4.3	0.623077	Spring	1
421	2011-10-19	Afternoon	3	48	13	3.69231	12	-8.30769	Spring	1
426	2011-10-20	Afternoon	6	96	14	6.85714	6	0.857143	Spring	1
431	2011-10-21	Afternoon	16	256	13	19.6923	7.3	12.3923	Spring	1
436	2011-10-22	Afternoon	48	768	14	54.8571	31	23.8571	Spring	1
441	2011-10-23	Afternoon	19	304	14	21.7143	38	-16.2857	Spring	1
446	2011-10-24	Afternoon	68	1088	14	77.7143	67	10.7143	Spring	1
451	2011-10-25	Afternoon	70	1120	14	80	123.3	-43.3	Spring	1
456	2011-10-26	Afternoon	0	0	14	0	41	-41	Spring	0
461	2011-10-27	Afternoon	14	224	14	16	33.7	-17.7	Spring	1
466	2011-10-28	Afternoon	3	48	14	3.42857	17.7	-14.2714	Spring	1
471	2011-10-29	Afternoon	0	0	14	0	8.3	-8.3	Spring	0
476	2011-10-30	Afternoon	1	16	14	1.14286	51.3	-50.1571	Spring	1
481	2011-10-31	Afternoon	6	96	14	6.85714	5.3	1.55714	Spring	1
486	2011-11-01	Afternoon	5	80	14	5.71429	13.3	-7.58571	Spring	1
491	2011-11-02	Afternoon	2	32	14	2.28571	3.7	-1.41429	Spring	1
496	2011-11-03	Afternoon	0	0	14	0	18.7	-18.7	Spring	0
501	2011-11-04	Afternoon	1	16	14	1.14286	7.7	-6.55714	Spring	1
506	2011-11-05	Afternoon	0	0	15	0	0.7	-0.7	Spring	0
511	2011-11-06	Afternoon	5	80	14	5.71429	2.3	3.41429	Spring	1
516	2011-11-07	Afternoon	0	0	14	0	10	-10	Spring	0
521	2011-11-08	Afternoon	9	144	15	9.6	12	-2.4	Spring	1
526	2011-11-09	Afternoon	2	32	15	2.13333	1.3	0.833333	Spring	1
531	2011-11-10	Afternoon	15	240	15	16	6	10	Spring	1
536	2011-11-11	Afternoon	15	240	15	16	12.7	3.3	Spring	1
541	2011-11-12	Afternoon	6	96	15	6.4	5.7	0.7	Spring	1
546	2011-11-13	Afternoon	0	0	15	0	13.3	-13.3	Spring	0
551	2011-11-14	Afternoon	0	0	15	0	25	-25	Spring	0
556	2011-11-15	Afternoon	0	0	15	0	6.7	-6.7	Spring	0
561	2011-11-16	Afternoon	0	0	15	0	2	-2	Spring	0
566	2011-11-17	Afternoon	0	0	15	0	5.7	-5.7	Spring	0
571	2011-11-18	Afternoon	3	48	15	3.2	4.7	-1.5	Spring	1
576	2011-11-19	Afternoon	7	112	15	7.46667	6	1.46667	Spring	1
581	2011-11-20	Afternoon	0	0	15	0	0	0	Spring	0
586	2011-11-21	Afternoon	0	0	15	0	0	0	Spring	0
591	2011-11-22	Afternoon	0	0	16	0	0	0	Spring	0
596	2011-11-23	Afternoon	0	0	16	0	0	0	Spring	0
601	2011-11-24	Afternoon	0	0	16	0	0	0	Spring	0
606	2011-11-25	Afternoon	0	0	16	0	0	0	Spring	0
611	2011-11-26	Afternoon	0	0	16	0	0	0	Spring	0
616	2011-11-27	Afternoon	0	0	16	0	0	0	Spring	0
621	2011-11-28	Afternoon	0	0	16	0	1.3	-1.3	Spring	0
626	2011-11-29	Afternoon	12	192	16	12	4	8	Spring	1
631	2011-11-30	Afternoon	3	48	16	3	5	-2	Spring	1
636	2011-12-01	Afternoon	0	0	16	0	6.7	-6.7	Summer	0
641	2011-12-02	Afternoon	0	0	16	0	0	0	Summer	0
646	2011-12-03	Afternoon	0	0	16	0	0	0	Summer	0
651	2011-12-04	Afternoon	0	0	16	0	0	0	Summer	0
656	2011-12-05	Afternoon	0	0	16	0	0	0	Summer	0
661	2011-12-06	Afternoon	0	0	16	0	0	0	Summer	0
666	2011-12-07	Afternoon	0	0	16	0	0	0	Summer	0
671	2011-12-08	Afternoon	0	0	16	0	0	0	Summer	0
676	2011-12-09	Afternoon	0	0	16	0	0	0	Summer	0
681	2011-12-10	Afternoon	0	0	16	0	0	0	Summer	0
686	2011-12-11	Afternoon	0	0	16	0	0	0	Summer	0
691	2011-12-12	Afternoon	0	0	16	0	0	0	Summer	0
696	2011-12-13	Afternoon	0	0	16	0	0	0	Summer	0
701	2011-12-14	Afternoon	0	0	16	0	0	0	Summer	0
706	2011-12-15	Afternoon	0	0	16	0	0	0	Summer	0
711	2011-12-16	Afternoon	0	0	17	0	0	0	Summer	0
716	2011-12-17	Afternoon	0	0	17	0	0	0	Summer	0
721	2011-12-18	Afternoon	0	0	17	0	0	0	Summer	0
726	2011-12-19	Afternoon	0	0	17	0	0	0	Summer	0
731	2011-12-20	Afternoon	0	0	17	0	0	0	Summer	0
736	2011-12-21	Afternoon	0	0	17	0	0	0	Summer	0
741	2011-12-22	Afternoon	0	0	17	0	0	0	Summer	0
746	2011-12-23	Afternoon	0	0	17	0	1.7	-1.7	Summer	0
751	2011-12-24	Afternoon	0	0	17	0	6.3	-6.3	Summer	0
756	2011-12-25	Afternoon	0	0	17	0	0	0	Summer	0
761	2011-12-26	Afternoon	0	0	17	0	0	0	Summer	0
766	2011-12-27	Afternoon	0	0	17	0	0	0	Summer	0
771	2011-12-28	Afternoon	0	0	17	0	0	0	Summer	0
776	2011-12-29	Afternoon	0	0	17	0	0	0	Summer	0
781	2011-12-30	Afternoon	0	0	17	0	0	0	Summer	0
786	2011-12-31	Afternoon	0	0	17	0	0	0	Summer	0
791	2012-01-01	Afternoon	0	0	17	0	0	0	Summer	0
796	2012-01-02	Afternoon	0	0	17	0	0	0	Summer	0
801	2012-01-03	Afternoon	0	0	17	0	0	0	Summer	0
806	2012-01-04	Afternoon	0	0	17	0	0	0	Summer	0
811	2012-01-05	Afternoon	0	0	17	0	0	0	Summer	0
816	2012-01-06	Afternoon	0	0	17	0	0	0	Summer	0
821	2012-01-07	Afternoon	0	0	17	0	0	0	Summer	0
826	2012-01-08	Afternoon	0	0	17	0	0	0	Summer	0
831	2012-01-09	Afternoon	0	0	17	0	0	0	Summer	0
836	2012-01-10	Afternoon	0	0	17	0	0	0	Summer	0
841	2012-01-11	Afternoon	0	0	17	0	0	0	Summer	0
846	2012-01-12	Afternoon	0	0	16	0	0	0	Summer	0
851	2012-01-13	Afternoon	0	0	17	0	0	0	Summer	0
856	2012-01-14	Afternoon	0	0	16	0	0	0	Summer	0
861	2012-01-15	Afternoon	0	0	16	0	0	0	Summer	0
866	2012-01-16	Afternoon	0	0	15	0	0	0	Summer	0
871	2012-01-17	Afternoon	0	0	15	0	0	0	Summer	0
876	2012-01-18	Afternoon	0	0	16	0	0	0	Summer	0
881	2012-01-19	Afternoon	0	0	15	0	0	0	Summer	0
886	2012-01-20	Afternoon	0	0	16	0	0	0	Summer	0
891	2012-01-21	Afternoon	0	0	15	0	0	0	Summer	0
896	2012-01-22	Afternoon	0	0	15	0	0	0	Summer	0
901	2012-01-23	Afternoon	0	0	15	0	0	0	Summer	0
906	2012-01-24	Afternoon	0	0	15	0	0	0	Summer	0
911	2012-01-25	Afternoon	0	0	15	0	0	0	Summer	0
916	2012-01-26	Afternoon	0	0	15	0	0	0	Summer	0
921	2012-01-27	Afternoon	0	0	15	0	0	0	Summer	0
926	2012-01-28	Afternoon	0	0	15	0	0	0	Summer	0
931	2012-01-29	Afternoon	0	0	16	0	0	0	Summer	0
936	2012-01-30	Afternoon	0	0	15	0	0	0	Summer	0
941	2012-01-31	Afternoon	0	0	17	0	0	0	Summer	0
946	2012-02-01	Afternoon	0	0	15	0	0	0	Summer	0
951	2012-02-02	Afternoon	0	0	15	0	0	0	Summer	0
956	2012-02-03	Afternoon	0	0	15	0	0	0	Summer	0
961	2012-02-04	Afternoon	0	0	15	0	0	0	Summer	0
966	2012-02-05	Afternoon	0	0	15	0	0	0	Summer	0
971	2012-02-06	Afternoon	0	0	15	0	0	0	Summer	0
976	2012-02-07	Afternoon	0	0	15	0	0	0	Summer	0
981	2012-02-08	Afternoon	0	0	15	0	0	0	Summer	0
986	2012-02-09	Afternoon	0	0	14	0	0	0	Summer	0
991	2012-02-10	Afternoon	0	0	14	0	0	0	Summer	0
996	2012-02-11	Afternoon	0	0	14	0	0	0	Summer	0
1001	2012-02-12	Afternoon	0	0	14	0	0	0	Summer	0
1006	2012-02-13	Afternoon	0	0	14	0	0	0	Summer	0
1011	2012-02-14	Afternoon	0	0	14	0	0	0	Summer	0
1016	2012-02-15	Afternoon	0	0	14	0	0	0	Summer	0
1021	2012-02-16	Afternoon	0	0	14	0	0	0	Summer	0
1026	2012-02-17	Afternoon	0	0	14	0	0	0	Summer	0
1031	2012-02-18	Afternoon	0	0	14	0	0	0	Summer	0
1036	2012-02-19	Afternoon	0	0	14	0	0	0	Summer	0
1041	2012-02-20	Afternoon	0	0	14	0	0	0	Summer	0
1046	2012-02-21	Afternoon	0	0	14	0	0	0	Summer	0
1051	2012-02-22	Afternoon	0	0	14	0	0	0	Summer	0
1056	2012-02-23	Afternoon	0	0	14	0	0	0	Summer	0
1061	2012-02-24	Afternoon	0	0	14	0	0	0	Summer	0
1066	2012-02-25	Afternoon	0	0	13	0	0	0	Summer	0
1071	2012-02-26	Afternoon	0	0	13	0	0.7	-0.7	Summer	0
1076	2012-02-27	Afternoon	0	0	13	0	0	0	Summer	0
1081	2012-02-28	Afternoon	0	0	13	0	0	0	Summer	0
1086	2012-02-29	Afternoon	0	0	13	0	0	0	Summer	0
1096	2012-03-02	Afternoon	0	0	13	0	0	0	Autumn	0
1101	2012-03-03	Afternoon	0	0	13	0	0	0	Autumn	0
1106	2012-03-04	Afternoon	0	0	13	0	0	0	Autumn	0
1111	2012-03-05	Afternoon	0	0	13	0	0	0	Autumn	0
1116	2012-03-06	Afternoon	0	0	13	0	0	0	Autumn	0
1121	2012-03-07	Afternoon	0	0	13	0	0	0	Autumn	0
1126	2012-03-08	Afternoon	0	0	13	0	0	0	Autumn	0
1131	2012-03-09	Afternoon	0	0	12	0	0	0	Autumn	0
1136	2012-03-10	Afternoon	0	0	12	0	0	0	Autumn	0
1141	2012-03-11	Afternoon	0	0	12	0	0	0	Autumn	0
1146	2012-03-12	Afternoon	0	0	12	0	0	0	Autumn	0
1151	2012-03-13	Afternoon	0	0	12	0	0	0	Autumn	0
1156	2012-03-14	Afternoon	0	0	12	0	0	0	Autumn	0
1161	2012-03-15	Afternoon	0	0	12	0	0	0	Autumn	0
1166	2012-03-16	Afternoon	0	0	12	0	0	0	Autumn	0
1171	2012-03-17	Afternoon	0	0	12	0	0	0	Autumn	0
1176	2012-03-18	Afternoon	0	0	12	0	0	0	Autumn	0
1181	2012-03-19	Afternoon	0	0	12	0	0	0	Autumn	0
1186	2012-03-20	Afternoon	26	416	12	34.6667	8.7	25.9667	Autumn	1
1191	2012-03-21	Afternoon	0	0	12	0	0	0	Autumn	0
1196	2012-03-22	Afternoon	0	0	12	0	0	0	Autumn	0
1201	2012-03-23	Afternoon	0	0	11	0	0	0	Autumn	0
1206	2012-03-24	Afternoon	0	0	12	0	0	0	Autumn	0
1211	2012-03-25	Afternoon	0	0	12	0	0	0	Autumn	0
1216	2012-03-26	Afternoon	0	0	12	0	0	0	Autumn	0
1221	2012-03-27	Afternoon	0	0	12	0	0	0	Autumn	0
1226	2012-03-28	Afternoon	0	0	12	0	0	0	Autumn	0
1231	2012-03-29	Afternoon	0	0	12	0	0	0	Autumn	0
1236	2012-03-30	Afternoon	0	0	12	0	0	0	Autumn	0
1241	2012-03-31	Afternoon	0	0	12	0	0	0	Autumn	0
1246	2012-04-01	Afternoon	0	0	12	0	0	0	Autumn	0
1251	2012-04-02	Afternoon	0	0	11	0	0	0	Autumn	0
1256	2012-04-03	Afternoon	0	0	11	0	0	0	Autumn	0
1261	2012-04-04	Afternoon	0	0	12	0	0	0	Autumn	0
1266	2012-04-05	Afternoon	0	0	11	0	0	0	Autumn	0
1271	2012-04-06	Afternoon	0	0	11	0	0	0	Autumn	0
1276	2012-04-07	Afternoon	0	0	11	0	0	0	Autumn	0
1281	2012-04-08	Afternoon	0	0	11	0	0	0	Autumn	0
1286	2012-04-09	Afternoon	0	0	11	0	0	0	Autumn	0
1291	2012-04-10	Afternoon	0	0	11	0	0	0	Autumn	0
1296	2012-04-11	Afternoon	0	0	11	0	0	0	Autumn	0
1301	2012-04-12	Afternoon	0	0	11	0	0	0	Autumn	0
1306	2012-04-13	Afternoon	0	0	11	0	0	0	Autumn	0
1311	2012-04-14	Afternoon	0	0	11	0	0	0	Autumn	0
1316	2012-04-15	Afternoon	0	0	11	0	8	-8	Autumn	0
1321	2012-04-16	Afternoon	0	0	11	0	0	0	Autumn	0
1326	2012-04-17	Afternoon	0	0	11	0	0	0	Autumn	0
1331	2012-04-18	Afternoon	0	0	11	0	0	0	Autumn	0
1336	2012-04-19	Afternoon	0	0	11	0	0	0	Autumn	0
1341	2012-04-20	Afternoon	0	0	10	0	0	0	Autumn	0
1346	2012-04-21	Afternoon	0	0	10	0	0	0	Autumn	0
1351	2012-04-22	Afternoon	0	0	10	0	0.3	-0.3	Autumn	0
1356	2012-04-23	Afternoon	0	0	10	0	0	0	Autumn	0
1361	2012-04-24	Afternoon	4	64	10	6.4	1.3	5.1	Autumn	1
1366	2012-04-25	Afternoon	0	0	10	0	0	0	Autumn	0
1371	2012-04-26	Afternoon	0	0	10	0	0	0	Autumn	0
1376	2012-04-27	Afternoon	0	0	10	0	0	0	Autumn	0
1381	2012-04-28	Afternoon	0	0	10	0	0	0	Autumn	0
1386	2012-04-29	Afternoon	0	0	10	0	0	0	Autumn	0
1391	2012-04-30	Afternoon	0	0	10	0	0	0	Autumn	0
1396	2012-05-01	Afternoon	0	0	10	0	0	0	Autumn	0
1401	2012-05-02	Afternoon	0	0	10	0	0	0	Autumn	0
1406	2012-05-03	Afternoon	0	0	10	0	0	0	Autumn	0
1411	2012-05-04	Afternoon	0	0	10	0	1.7	-1.7	Autumn	0
1416	2012-05-05	Afternoon	1	16	10	1.6	9.3	-7.7	Autumn	1
1421	2012-05-06	Afternoon	0	0	9	0	13	-13	Autumn	0
1426	2012-05-07	Afternoon	0	0	9	0	1.7	-1.7	Autumn	0
1431	2012-05-08	Afternoon	0	0	9	0	0	0	Autumn	0
1436	2012-05-09	Afternoon	0	0	9	0	1.7	-1.7	Autumn	0
1441	2012-05-10	Afternoon	14	224	9	24.8889	23	1.88889	Autumn	1
1446	2012-05-11	Afternoon	0	0	9	0	0	0	Autumn	0
1451	2012-05-12	Afternoon	2	32	9	3.55556	3.7	-0.144444	Autumn	1
1456	2012-05-13	Afternoon	0	0	9	0	14.7	-14.7	Autumn	0
1461	2012-05-14	Afternoon	99	1584	9	176	54.7	121.3	Autumn	1
1466	2012-05-15	Afternoon	7	112	9	12.4444	26.7	-14.2556	Autumn	1
1471	2012-05-16	Afternoon	17	272	9	30.2222	22	8.22222	Autumn	1
1476	2012-05-17	Afternoon	35	560	9	62.2222	47.3	14.9222	Autumn	1
1481	2012-05-18	Afternoon	4	64	9	7.11111	37.7	-30.5889	Autumn	1
1486	2012-05-19	Afternoon	8	128	9	14.2222	53.3	-39.0778	Autumn	1
1491	2012-05-20	Afternoon	30	480	9	53.3333	72.3	-18.9667	Autumn	1
1496	2012-05-21	Afternoon	40	640	9	71.1111	63.3	7.81111	Autumn	1
1501	2012-05-22	Afternoon	87	1392	9	154.667	174.3	-19.6333	Autumn	1
1506	2012-05-23	Afternoon	81	1296	9	144	267	-123	Autumn	1
4	2011-07-23	Dawn	30	720	3	240	198.5	41.5	Winter	1
9	2011-07-24	Dawn	28	672	3	224	294	-70	Winter	1
14	2011-07-25	Dawn	28	672	3	224	243	-19	Winter	1
19	2011-07-26	Dawn	14	336	3	112	160.5	-48.5	Winter	1
24	2011-07-27	Dawn	39	936	3	312	161.5	150.5	Winter	1
29	2011-07-28	Dawn	27	648	3	216	239.5	-23.5	Winter	1
34	2011-07-29	Dawn	35	840	3	280	234.5	45.5	Winter	1
39	2011-07-30	Dawn	40	960	3	320	128	192	Winter	1
44	2011-07-31	Dawn	2	48	3	16	72.5	-56.5	Winter	1
49	2011-08-01	Dawn	28	672	3	224	169	55	Winter	1
54	2011-08-07	Dawn	36	576	2	288	283.7	4.3	Winter	1
59	2011-08-08	Dawn	19	304	2	152	143	9	Winter	1
64	2011-08-09	Dawn	27	432	2	216	89.3	126.7	Winter	1
69	2011-08-10	Dawn	10	160	3	53.3333	64	-10.6667	Winter	1
74	2011-08-11	Dawn	91	1456	3	485.333	361	124.333	Winter	1
79	2011-08-12	Dawn	88	1408	3	25	298	-273	Winter	1
84	2011-08-13	Dawn	43	688	3	229.333	258.7	-29.3667	Winter	1
89	2011-08-14	Dawn	20	320	3	106.667	104	2.66667	Winter	1
94	2011-08-15	Dawn	10	160	3	53.3333	152	-98.6667	Winter	1
99	2011-08-16	Dawn	65	1040	3	346.667	282	64.6667	Winter	1
104	2011-08-17	Dawn	10	160	3	53.3333	233.3	-179.967	Winter	1
109	2011-08-18	Dawn	16	256	2	128	356.7	-228.7	Winter	1
114	2011-08-19	Dawn	23	368	2	184	445.7	-261.7	Winter	1
119	2011-08-20	Dawn	0	0	2	0	145.7	-145.7	Winter	0
124	2011-08-21	Dawn	18	288	2	144	323.7	-179.7	Winter	1
129	2011-08-22	Dawn	0	0	2	0	207.3	-207.3	Winter	0
134	2011-08-23	Dawn	18	288	3	96	111	-15	Winter	1
139	2011-08-24	Dawn	13	208	2	104	199.3	-95.3	Winter	1
144	2011-08-25	Dawn	22	352	2	176	72	104	Winter	1
149	2011-08-26	Dawn	35	560	2	280	299.3	-19.3	Winter	1
154	2011-08-27	Dawn	46	736	2	368	263.7	104.3	Winter	1
159	2011-08-28	Dawn	10	160	2	80	100.7	-20.7	Winter	1
164	2011-08-29	Dawn	0	0	2	0	219.3	-219.3	Winter	0
169	2011-08-30	Dawn	77	1232	3	410.667	267.3	143.367	Winter	1
174	2011-08-31	Dawn	9	144	3	48	156.7	-108.7	Winter	1
179	2011-09-01	Dawn	12	192	2	96	85.7	10.3	Spring	1
184	2011-09-02	Dawn	0	0	2	0	80.3	-80.3	Spring	0
189	2011-09-03	Dawn	3	48	2	24	31.7	-7.7	Spring	1
194	2011-09-04	Dawn	4	64	2	32	56	-24	Spring	1
199	2011-09-05	Dawn	3	48	2	24	8	16	Spring	1
204	2011-09-06	Dawn	1	16	2	8	273.3	-265.3	Spring	1
209	2011-09-07	Dawn	76	1216	2	608	216	392	Spring	1
214	2011-09-08	Dawn	4	64	2	32	135.7	-103.7	Spring	1
219	2011-09-09	Dawn	4	64	2	32	97	-65	Spring	1
224	2011-09-10	Dawn	8	128	3	42.6667	110.7	-68.0333	Spring	1
229	2011-09-11	Dawn	20	320	3	106.667	360	-253.333	Spring	1
234	2011-09-12	Dawn	34	544	3	181.333	204	-22.6667	Spring	1
239	2011-09-13	Dawn	24	384	3	128	115.3	12.7	Spring	1
244	2011-09-14	Dawn	4	64	3	21.3333	137.3	-115.967	Spring	1
249	2011-09-15	Dawn	2	32	3	10.6667	79.3	-68.6333	Spring	1
254	2011-09-16	Dawn	4	64	2	32	75	-43	Spring	1
259	2011-09-17	Dawn	1	16	2	8	46.3	-38.3	Spring	1
264	2011-09-18	Dawn	13	208	2	104	60.3	43.7	Spring	1
269	2011-09-19	Dawn	1	16	2	8	82	-74	Spring	1
274	2011-09-20	Dawn	7	112	2	56	544	-488	Spring	1
279	2011-09-21	Dawn	4	64	2	32	118.3	-86.3	Spring	1
284	2011-09-22	Dawn	29	464	2	232	92.3	139.7	Spring	1
289	2011-09-23	Dawn	0	0	2	0	76.3	-76.3	Spring	0
294	2011-09-24	Dawn	11	176	3	58.6667	91.7	-33.0333	Spring	1
299	2011-09-25	Dawn	0	0	3	0	35.8	-35.8	Spring	0
304	2011-09-26	Dawn	3	48	1	48	32	16	Spring	1
309	2011-09-27	Dawn	0	0	3	0	4.6	-4.6	Spring	0
314	2011-09-28	Dawn	0	0	3	0	18.7	-18.7	Spring	0
319	2011-09-29	Dawn	8	128	2	64	47.3	16.7	Spring	1
324	2011-09-30	Dawn	0	0	2	0	20	-20	Spring	0
329	2011-10-01	Dawn	0	0	2	0	0	0	Spring	0
334	2011-10-02	Dawn	0	0	2	0	18.3	-18.3	Spring	0
339	2011-10-03	Dawn	0	0	2	0	39	-39	Spring	0
344	2011-10-04	Dawn	5	80	2	40	87	-47	Spring	1
349	2011-10-05	Dawn	13	208	2	104	25.7	78.3	Spring	1
354	2011-10-06	Dawn	1	16	3	5.33333	1	4.33333	Spring	1
359	2011-10-07	Dawn	0	0	2	0	1	-1	Spring	0
364	2011-10-08	Dawn	0	0	3	0	8	-8	Spring	0
369	2011-10-09	Dawn	21	336	3	112	111.3	0.7	Spring	1
374	2011-10-10	Dawn	0	0	3	0	18	-18	Spring	0
379	2011-10-11	Dawn	0	0	3	0	10.3	-10.3	Spring	0
384	2011-10-12	Dawn	0	0	3	0	2.3	-2.3	Spring	0
389	2011-10-13	Dawn	1	16	2	8	6	2	Spring	1
394	2011-10-14	Dawn	1	16	2	8	26	-18	Spring	1
399	2011-10-15	Dawn	0	0	2	0	13.3	-13.3	Spring	0
404	2011-10-16	Dawn	0	0	2	0	7	-7	Spring	0
409	2011-10-17	Dawn	0	0	2	0	0	0	Spring	0
414	2011-10-18	Dawn	0	0	3	0	4.3	-4.3	Spring	0
419	2011-10-19	Dawn	0	0	3	0	12	-12	Spring	0
424	2011-10-20	Dawn	0	0	3	0	6	-6	Spring	0
429	2011-10-21	Dawn	0	0	2	0	7.3	-7.3	Spring	0
434	2011-10-22	Dawn	0	0	3	0	31	-31	Spring	0
439	2011-10-23	Dawn	1	16	3	5.33333	38	-32.6667	Spring	1
444	2011-10-24	Dawn	14	224	3	74.6667	67	7.66667	Spring	1
449	2011-10-25	Dawn	11	176	3	58.6667	123.3	-64.6333	Spring	1
454	2011-10-26	Dawn	20	320	3	106.667	41	65.6667	Spring	1
459	2011-10-27	Dawn	5	80	2	40	33.7	6.3	Spring	1
464	2011-10-28	Dawn	12	192	2	96	17.7	78.3	Spring	1
469	2011-10-29	Dawn	0	0	2	0	8.3	-8.3	Spring	0
474	2011-10-30	Dawn	18	288	2	144	51.3	92.7	Spring	1
479	2011-10-31	Dawn	0	0	3	0	5.3	-5.3	Spring	0
484	2011-11-01	Dawn	2	32	3	10.6667	13.3	-2.63333	Spring	1
489	2011-11-02	Dawn	0	0	3	0	3.7	-3.7	Spring	0
494	2011-11-03	Dawn	26	416	3	138.667	18.7	119.967	Spring	1
499	2011-11-04	Dawn	0	0	3	0	7.7	-7.7	Spring	0
504	2011-11-05	Dawn	0	0	3	0	0.7	-0.7	Spring	0
509	2011-11-06	Dawn	0	0	3	0	2.3	-2.3	Spring	0
514	2011-11-07	Dawn	0	0	3	0	10	-10	Spring	0
519	2011-11-08	Dawn	0	0	3	0	12	-12	Spring	0
524	2011-11-09	Dawn	0	0	3	0	1.3	-1.3	Spring	0
529	2011-11-10	Dawn	0	0	3	0	6	-6	Spring	0
534	2011-11-11	Dawn	0	0	3	0	12.7	-12.7	Spring	0
539	2011-11-12	Dawn	0	0	3	0	5.7	-5.7	Spring	0
544	2011-11-13	Dawn	0	0	3	0	13.3	-13.3	Spring	0
549	2011-11-14	Dawn	0	0	3	0	25	-25	Spring	0
554	2011-11-15	Dawn	0	0	3	0	6.7	-6.7	Spring	0
559	2011-11-16	Dawn	0	0	3	0	2	-2	Spring	0
564	2011-11-17	Dawn	0	0	3	0	5.7	-5.7	Spring	0
569	2011-11-18	Dawn	5	80	3	26.6667	4.7	21.9667	Spring	1
574	2011-11-19	Dawn	0	0	3	0	6	-6	Spring	0
579	2011-11-20	Dawn	0	0	3	0	0	0	Spring	0
584	2011-11-21	Dawn	0	0	3	0	0	0	Spring	0
589	2011-11-22	Dawn	0	0	3	0	0	0	Spring	0
594	2011-11-23	Dawn	0	0	3	0	0	0	Spring	0
599	2011-11-24	Dawn	0	0	3	0	0	0	Spring	0
604	2011-11-25	Dawn	0	0	3	0	0	0	Spring	0
609	2011-11-26	Dawn	0	0	3	0	0	0	Spring	0
614	2011-11-27	Dawn	0	0	3	0	0	0	Spring	0
619	2011-11-28	Dawn	0	0	3	0	1.3	-1.3	Spring	0
624	2011-11-29	Dawn	0	0	4	0	4	-4	Spring	0
629	2011-11-30	Dawn	0	0	3	0	5	-5	Spring	0
634	2011-12-01	Dawn	0	0	4	0	6.7	-6.7	Summer	0
639	2011-12-02	Dawn	0	0	4	0	0	0	Summer	0
644	2011-12-03	Dawn	0	0	4	0	0	0	Summer	0
649	2011-12-04	Dawn	0	0	4	0	0	0	Summer	0
654	2011-12-05	Dawn	0	0	4	0	0	0	Summer	0
659	2011-12-06	Dawn	0	0	4	0	0	0	Summer	0
664	2011-12-07	Dawn	0	0	4	0	0	0	Summer	0
669	2011-12-08	Dawn	0	0	4	0	0	0	Summer	0
674	2011-12-09	Dawn	0	0	4	0	0	0	Summer	0
679	2011-12-10	Dawn	0	0	4	0	0	0	Summer	0
684	2011-12-11	Dawn	0	0	4	0	0	0	Summer	0
689	2011-12-12	Dawn	0	0	4	0	0	0	Summer	0
694	2011-12-13	Dawn	0	0	4	0	0	0	Summer	0
699	2011-12-14	Dawn	0	0	4	0	0	0	Summer	0
704	2011-12-15	Dawn	0	0	4	0	0	0	Summer	0
709	2011-12-16	Dawn	0	0	4	0	0	0	Summer	0
714	2011-12-17	Dawn	0	0	4	0	0	0	Summer	0
719	2011-12-18	Dawn	0	0	4	0	0	0	Summer	0
724	2011-12-19	Dawn	0	0	4	0	0	0	Summer	0
729	2011-12-20	Dawn	0	0	4	0	0	0	Summer	0
734	2011-12-21	Dawn	0	0	4	0	0	0	Summer	0
739	2011-12-22	Dawn	0	0	4	0	0	0	Summer	0
744	2011-12-23	Dawn	0	0	4	0	1.7	-1.7	Summer	0
749	2011-12-24	Dawn	0	0	4	0	6.3	-6.3	Summer	0
754	2011-12-25	Dawn	0	0	4	0	0	0	Summer	0
759	2011-12-26	Dawn	0	0	4	0	0	0	Summer	0
764	2011-12-27	Dawn	0	0	4	0	0	0	Summer	0
769	2011-12-28	Dawn	0	0	4	0	0	0	Summer	0
774	2011-12-29	Dawn	0	0	4	0	0	0	Summer	0
779	2011-12-30	Dawn	0	0	4	0	0	0	Summer	0
784	2011-12-31	Dawn	0	0	4	0	0	0	Summer	0
789	2012-01-01	Dawn	0	0	4	0	0	0	Summer	0
794	2012-01-02	Dawn	0	0	4	0	0	0	Summer	0
799	2012-01-03	Dawn	0	0	4	0	0	0	Summer	0
804	2012-01-04	Dawn	0	0	4	0	0	0	Summer	0
809	2012-01-05	Dawn	0	0	4	0	0	0	Summer	0
814	2012-01-06	Dawn	0	0	3	0	0	0	Summer	0
819	2012-01-07	Dawn	0	0	4	0	0	0	Summer	0
824	2012-01-08	Dawn	0	0	3	0	0	0	Summer	0
829	2012-01-09	Dawn	0	0	3	0	0	0	Summer	0
834	2012-01-10	Dawn	0	0	3	0	0	0	Summer	0
839	2012-01-11	Dawn	0	0	3	0	0	0	Summer	0
844	2012-01-12	Dawn	0	0	3	0	0	0	Summer	0
849	2012-01-13	Dawn	0	0	3	0	0	0	Summer	0
854	2012-01-14	Dawn	0	0	4	0	0	0	Summer	0
859	2012-01-15	Dawn	0	0	4	0	0	0	Summer	0
864	2012-01-16	Dawn	0	0	4	0	0	0	Summer	0
869	2012-01-17	Dawn	0	0	4	0	0	0	Summer	0
874	2012-01-18	Dawn	0	0	4	0	0	0	Summer	0
879	2012-01-19	Dawn	0	0	4	0	0	0	Summer	0
884	2012-01-20	Dawn	0	0	3	0	0	0	Summer	0
889	2012-01-21	Dawn	0	0	3	0	0	0	Summer	0
894	2012-01-22	Dawn	0	0	3	0	0	0	Summer	0
899	2012-01-23	Dawn	0	0	3	0	0	0	Summer	0
904	2012-01-24	Dawn	0	0	3	0	0	0	Summer	0
909	2012-01-25	Dawn	0	0	3	0	0	0	Summer	0
914	2012-01-26	Dawn	0	0	3	0	0	0	Summer	0
919	2012-01-27	Dawn	0	0	3	0	0	0	Summer	0
924	2012-01-28	Dawn	0	0	3	0	0	0	Summer	0
929	2012-01-29	Dawn	0	0	3	0	0	0	Summer	0
934	2012-01-30	Dawn	0	0	3	0	0	0	Summer	0
939	2012-01-31	Dawn	0	0	4	0	0	0	Summer	0
944	2012-02-01	Dawn	0	0	3	0	0	0	Summer	0
949	2012-02-02	Dawn	0	0	3	0	0	0	Summer	0
954	2012-02-03	Dawn	0	0	3	0	0	0	Summer	0
959	2012-02-04	Dawn	0	0	3	0	0	0	Summer	0
964	2012-02-05	Dawn	0	0	3	0	0	0	Summer	0
969	2012-02-06	Dawn	0	0	3	0	0	0	Summer	0
974	2012-02-07	Dawn	0	0	3	0	0	0	Summer	0
979	2012-02-08	Dawn	0	0	3	0	0	0	Summer	0
984	2012-02-09	Dawn	0	0	3	0	0	0	Summer	0
989	2012-02-10	Dawn	0	0	3	0	0	0	Summer	0
994	2012-02-11	Dawn	0	0	3	0	0	0	Summer	0
999	2012-02-12	Dawn	0	0	3	0	0	0	Summer	0
1004	2012-02-13	Dawn	0	0	3	0	0	0	Summer	0
1009	2012-02-14	Dawn	0	0	2	0	0	0	Summer	0
1014	2012-02-15	Dawn	0	0	3	0	0	0	Summer	0
1019	2012-02-16	Dawn	0	0	2	0	0	0	Summer	0
1024	2012-02-17	Dawn	0	0	3	0	0	0	Summer	0
1029	2012-02-18	Dawn	0	0	3	0	0	0	Summer	0
1034	2012-02-19	Dawn	0	0	3	0	0	0	Summer	0
1039	2012-02-20	Dawn	0	0	3	0	0	0	Summer	0
1044	2012-02-21	Dawn	0	0	3	0	0	0	Summer	0
1049	2012-02-22	Dawn	0	0	3	0	0	0	Summer	0
1054	2012-02-23	Dawn	0	0	3	0	0	0	Summer	0
1059	2012-02-24	Dawn	0	0	3	0	0	0	Summer	0
1064	2012-02-25	Dawn	0	0	3	0	0	0	Summer	0
1069	2012-02-26	Dawn	0	0	3	0	0.7	-0.7	Summer	0
1074	2012-02-27	Dawn	0	0	2	0	0	0	Summer	0
1079	2012-02-28	Dawn	0	0	2	0	0	0	Summer	0
1084	2012-02-29	Dawn	0	0	2	0	0	0	Summer	0
1094	2012-03-02	Dawn	0	0	2	0	0	0	Autumn	0
1099	2012-03-03	Dawn	0	0	2	0	0	0	Autumn	0
1104	2012-03-04	Dawn	0	0	2	0	0	0	Autumn	0
1109	2012-03-05	Dawn	0	0	3	0	0	0	Autumn	0
1114	2012-03-06	Dawn	0	0	3	0	0	0	Autumn	0
1119	2012-03-07	Dawn	0	0	3	0	0	0	Autumn	0
1124	2012-03-08	Dawn	0	0	3	0	0	0	Autumn	0
1129	2012-03-09	Dawn	0	0	3	0	0	0	Autumn	0
1134	2012-03-10	Dawn	0	0	3	0	0	0	Autumn	0
1139	2012-03-11	Dawn	0	0	3	0	0	0	Autumn	0
1144	2012-03-12	Dawn	0	0	3	0	0	0	Autumn	0
1149	2012-03-13	Dawn	0	0	2	0	0	0	Autumn	0
1154	2012-03-14	Dawn	0	0	2	0	0	0	Autumn	0
1159	2012-03-15	Dawn	0	0	2	0	0	0	Autumn	0
1164	2012-03-16	Dawn	0	0	2	0	0	0	Autumn	0
1169	2012-03-17	Dawn	0	0	2	0	0	0	Autumn	0
1174	2012-03-18	Dawn	0	0	2	0	0	0	Autumn	0
1179	2012-03-19	Dawn	0	0	2	0	0	0	Autumn	0
1184	2012-03-20	Dawn	0	0	2	0	8.7	-8.7	Autumn	0
1189	2012-03-21	Dawn	0	0	2	0	0	0	Autumn	0
1194	2012-03-22	Dawn	0	0	2	0	0	0	Autumn	0
1199	2012-03-23	Dawn	0	0	3	0	0	0	Autumn	0
1204	2012-03-24	Dawn	0	0	3	0	0	0	Autumn	0
1209	2012-03-25	Dawn	0	0	3	0	0	0	Autumn	0
1214	2012-03-26	Dawn	0	0	3	0	0	0	Autumn	0
1219	2012-03-27	Dawn	0	0	3	0	0	0	Autumn	0
1224	2012-03-28	Dawn	0	0	3	0	0	0	Autumn	0
1229	2012-03-29	Dawn	0	0	3	0	0	0	Autumn	0
1234	2012-03-30	Dawn	0	0	3	0	0	0	Autumn	0
1239	2012-03-31	Dawn	0	0	2	0	0	0	Autumn	0
1244	2012-04-01	Dawn	0	0	2	0	0	0	Autumn	0
1249	2012-04-02	Dawn	0	0	2	0	0	0	Autumn	0
1254	2012-04-03	Dawn	0	0	2	0	0	0	Autumn	0
1259	2012-04-04	Dawn	0	0	2	0	0	0	Autumn	0
1264	2012-04-05	Dawn	0	0	2	0	0	0	Autumn	0
1269	2012-04-06	Dawn	0	0	2	0	0	0	Autumn	0
1274	2012-04-07	Dawn	0	0	2	0	0	0	Autumn	0
1279	2012-04-08	Dawn	0	0	2	0	0	0	Autumn	0
1284	2012-04-09	Dawn	0	0	3	0	0	0	Autumn	0
1289	2012-04-10	Dawn	0	0	2	0	0	0	Autumn	0
1294	2012-04-11	Dawn	0	0	3	0	0	0	Autumn	0
1299	2012-04-12	Dawn	0	0	3	0	0	0	Autumn	0
1304	2012-04-13	Dawn	0	0	3	0	0	0	Autumn	0
1309	2012-04-14	Dawn	0	0	3	0	0	0	Autumn	0
1314	2012-04-15	Dawn	0	0	3	0	8	-8	Autumn	0
1319	2012-04-16	Dawn	0	0	3	0	0	0	Autumn	0
1324	2012-04-17	Dawn	0	0	3	0	0	0	Autumn	0
1329	2012-04-18	Dawn	0	0	3	0	0	0	Autumn	0
1334	2012-04-19	Dawn	0	0	2	0	0	0	Autumn	0
1339	2012-04-20	Dawn	0	0	2	0	0	0	Autumn	0
1344	2012-04-21	Dawn	0	0	2	0	0	0	Autumn	0
1349	2012-04-22	Dawn	0	0	2	0	0.3	-0.3	Autumn	0
1354	2012-04-23	Dawn	0	0	2	0	0	0	Autumn	0
1359	2012-04-24	Dawn	0	0	2	0	1.3	-1.3	Autumn	0
1364	2012-04-25	Dawn	0	0	2	0	0	0	Autumn	0
1369	2012-04-26	Dawn	0	0	3	0	0	0	Autumn	0
1374	2012-04-27	Dawn	0	0	3	0	0	0	Autumn	0
1379	2012-04-28	Dawn	0	0	3	0	0	0	Autumn	0
1384	2012-04-29	Dawn	0	0	2	0	0	0	Autumn	0
1389	2012-04-30	Dawn	0	0	3	0	0	0	Autumn	0
1394	2012-05-01	Dawn	0	0	3	0	0	0	Autumn	0
1399	2012-05-02	Dawn	0	0	3	0	0	0	Autumn	0
1404	2012-05-03	Dawn	0	0	3	0	0	0	Autumn	0
1409	2012-05-04	Dawn	0	0	3	0	1.7	-1.7	Autumn	0
1414	2012-05-05	Dawn	0	0	3	0	9.3	-9.3	Autumn	0
1419	2012-05-06	Dawn	0	0	3	0	13	-13	Autumn	0
1424	2012-05-07	Dawn	0	0	3	0	1.7	-1.7	Autumn	0
1429	2012-05-08	Dawn	0	0	3	0	0	0	Autumn	0
1434	2012-05-09	Dawn	0	0	3	0	1.7	-1.7	Autumn	0
1439	2012-05-10	Dawn	0	0	3	0	23	-23	Autumn	0
1444	2012-05-11	Dawn	0	0	3	0	0	0	Autumn	0
1449	2012-05-12	Dawn	0	0	2	0	3.7	-3.7	Autumn	0
1454	2012-05-13	Dawn	1	16	2	8	14.7	-6.7	Autumn	1
1459	2012-05-14	Dawn	0	0	2	0	54.7	-54.7	Autumn	0
1464	2012-05-15	Dawn	0	0	2	0	26.7	-26.7	Autumn	0
1469	2012-05-16	Dawn	2	32	2	16	22	-6	Autumn	1
1474	2012-05-17	Dawn	8	128	2	64	47.3	16.7	Autumn	1
1479	2012-05-18	Dawn	1	16	2	8	37.7	-29.7	Autumn	1
1484	2012-05-19	Dawn	0	0	2	0	53.3	-53.3	Autumn	0
1489	2012-05-20	Dawn	16	256	2	128	72.3	55.7	Autumn	1
1494	2012-05-21	Dawn	3	48	3	16	63.3	-47.3	Autumn	1
1499	2012-05-22	Dawn	35	560	3	186.667	174.3	12.3667	Autumn	1
1504	2012-05-23	Dawn	32	512	3	170.667	267	-96.3333	Autumn	1
1509	2012-05-24	Dawn	42	672	3	224	171.8	52.2	Autumn	1
2	2011-07-22	Dusk	15	360	3	120	222.9	-102.9	Winter	1
7	2011-07-23	Dusk	37	888	3	296	198.5	97.5	Winter	1
12	2011-07-24	Dusk	57	1368	3	456	294	162	Winter	1
17	2011-07-25	Dusk	36	864	3	288	243	45	Winter	1
22	2011-07-26	Dusk	26	624	3	208	160.5	47.5	Winter	1
27	2011-07-27	Dusk	38	912	3	304	161.5	142.5	Winter	1
32	2011-07-28	Dusk	51	1224	3	408	239.5	168.5	Winter	1
37	2011-07-29	Dusk	22	528	3	176	234.5	-58.5	Winter	1
42	2011-07-30	Dusk	8	192	3	64	128	-64	Winter	1
47	2011-07-31	Dusk	12	288	3	96	72.5	23.5	Winter	1
52	2011-08-06	Dusk	51	816	2	408	512	-104	Winter	1
57	2011-08-07	Dusk	44	704	2	352	283.7	68.3	Winter	1
62	2011-08-08	Dusk	12	192	2	96	143	-47	Winter	1
67	2011-08-09	Dusk	7	112	2	56	89.3	-33.3	Winter	1
72	2011-08-10	Dusk	15	240	2	120	64	56	Winter	1
77	2011-08-11	Dusk	66	1056	2	528	361	167	Winter	1
82	2011-08-12	Dusk	52	832	3	277.333	298	-20.6667	Winter	1
87	2011-08-13	Dusk	109	1744	3	581.333	258.7	322.633	Winter	1
92	2011-08-14	Dusk	14	224	3	74.6667	104	-29.3333	Winter	1
97	2011-08-15	Dusk	93	1488	3	496	152	344	Winter	1
102	2011-08-16	Dusk	55	880	3	293.333	282	11.3333	Winter	1
107	2011-08-17	Dusk	40	640	3	213.333	233.3	-19.9667	Winter	1
112	2011-08-18	Dusk	97	1552	3	517.333	356.7	160.633	Winter	1
117	2011-08-19	Dusk	136	2176	3	725.333	445.7	279.633	Winter	1
122	2011-08-20	Dusk	29	464	3	154.667	145.7	8.96667	Winter	1
127	2011-08-21	Dusk	47	752	2	376	323.7	52.3	Winter	1
132	2011-08-22	Dusk	62	992	3	330.667	207.3	123.367	Winter	1
137	2011-08-23	Dusk	3	48	3	16	111	-95	Winter	1
142	2011-08-24	Dusk	57	912	2	456	199.3	256.7	Winter	1
147	2011-08-25	Dusk	10	160	2	80	72	8	Winter	1
152	2011-08-26	Dusk	5	80	2	40	299.3	-259.3	Winter	1
157	2011-08-27	Dusk	50	800	2	400	263.7	136.3	Winter	1
162	2011-08-28	Dusk	30	480	2	240	100.7	139.3	Winter	1
167	2011-08-29	Dusk	30	480	2	240	219.3	20.7	Winter	1
172	2011-08-30	Dusk	41	656	2	328	267.3	60.7	Winter	1
177	2011-08-31	Dusk	4	64	2	32	156.7	-124.7	Winter	1
182	2011-09-01	Dusk	22	352	2	176	85.7	90.3	Spring	1
187	2011-09-02	Dusk	64	1024	3	341.333	80.3	261.033	Spring	1
192	2011-09-03	Dusk	9	144	3	48	31.7	16.3	Spring	1
197	2011-09-04	Dusk	17	272	3	90.6667	56	34.6667	Spring	1
202	2011-09-05	Dusk	16	256	3	85.3333	8	77.3333	Spring	1
207	2011-09-06	Dusk	38	608	3	202.667	273.3	-70.6333	Spring	1
212	2011-09-07	Dusk	52	832	3	277.333	216	61.3333	Spring	1
217	2011-09-08	Dusk	50	800	3	266.667	135.7	130.967	Spring	1
222	2011-09-09	Dusk	36	576	3	192	97	95	Spring	1
227	2011-09-10	Dusk	59	944	2	472	110.7	361.3	Spring	1
232	2011-09-11	Dusk	23	368	2	184	360	-176	Spring	1
237	2011-09-12	Dusk	14	224	2	112	204	-92	Spring	1
242	2011-09-13	Dusk	23	368	2	184	115.3	68.7	Spring	1
247	2011-09-14	Dusk	49	784	2	392	137.3	254.7	Spring	1
252	2011-09-15	Dusk	10	160	2	80	79.3	0.7	Spring	1
257	2011-09-16	Dusk	7	112	2	56	75	-19	Spring	1
262	2011-09-17	Dusk	0	0	2	0	46.3	-46.3	Spring	0
267	2011-09-18	Dusk	1	16	2	8	60.3	-52.3	Spring	1
272	2011-09-19	Dusk	2	32	2	16	82	-66	Spring	1
277	2011-09-20	Dusk	13	208	2	104	544	-440	Spring	1
282	2011-09-21	Dusk	71	1136	12	94.6667	118.3	-23.6333	Spring	1
287	2011-09-22	Dusk	14	224	3	74.6667	92.3	-17.6333	Spring	1
292	2011-09-23	Dusk	43	688	3	229.333	76.3	153.033	Spring	1
297	2011-09-24	Dusk	0	0	3	0	91.7	-91.7	Spring	0
302	2011-09-25	Dusk	10	160	3	53.3333	35.8	17.5333	Spring	1
307	2011-09-26	Dusk	0	0	3	0	32	-32	Spring	0
312	2011-09-27	Dusk	0	0	3	0	4.6	-4.6	Spring	0
317	2011-09-28	Dusk	0	0	3	0	18.7	-18.7	Spring	0
322	2011-09-29	Dusk	0	0	3	0	47.3	-47.3	Spring	0
327	2011-09-30	Dusk	5	80	2	40	20	20	Spring	1
332	2011-10-01	Dusk	0	0	2	0	0	0	Spring	0
337	2011-10-02	Dusk	8	128	2	64	18.3	45.7	Spring	1
342	2011-10-03	Dusk	6	96	2	48	39	9	Spring	1
347	2011-10-04	Dusk	0	0	2	0	87	-87	Spring	0
352	2011-10-05	Dusk	1	16	2	8	25.7	-17.7	Spring	1
357	2011-10-06	Dusk	0	0	2	0	1	-1	Spring	0
362	2011-10-07	Dusk	0	0	2	0	1	-1	Spring	0
367	2011-10-08	Dusk	0	0	2	0	8	-8	Spring	0
372	2011-10-09	Dusk	13	208	2	104	111.3	-7.3	Spring	1
377	2011-10-10	Dusk	6	96	2	48	18	30	Spring	1
382	2011-10-11	Dusk	0	0	3	0	10.3	-10.3	Spring	0
387	2011-10-12	Dusk	0	0	3	0	2.3	-2.3	Spring	0
392	2011-10-13	Dusk	0	0	3	0	6	-6	Spring	0
397	2011-10-14	Dusk	5	80	3	26.6667	26	0.666667	Spring	1
402	2011-10-15	Dusk	0	0	3	0	13.3	-13.3	Spring	0
407	2011-10-16	Dusk	1	16	3	5.33333	7	-1.66667	Spring	1
412	2011-10-17	Dusk	0	0	3	0	0	0	Spring	0
417	2011-10-18	Dusk	0	0	2	0	4.3	-4.3	Spring	0
422	2011-10-19	Dusk	5	80	2	40	12	28	Spring	1
427	2011-10-20	Dusk	7	112	2	56	6	50	Spring	1
432	2011-10-21	Dusk	0	0	2	0	7.3	-7.3	Spring	0
437	2011-10-22	Dusk	2	32	2	16	31	-15	Spring	1
442	2011-10-23	Dusk	1	16	2	8	38	-30	Spring	1
447	2011-10-24	Dusk	27	432	3	144	67	77	Spring	1
452	2011-10-25	Dusk	3	48	3	16	123.3	-107.3	Spring	1
457	2011-10-26	Dusk	7	112	3	37.3333	41	-3.66667	Spring	1
462	2011-10-27	Dusk	5	80	3	26.6667	33.7	-7.03333	Spring	1
467	2011-10-28	Dusk	1	16	3	5.33333	17.7	-12.3667	Spring	1
472	2011-10-29	Dusk	0	0	2	0	8.3	-8.3	Spring	0
477	2011-10-30	Dusk	10	160	3	53.3333	51.3	2.03333	Spring	1
482	2011-10-31	Dusk	0	0	2	0	5.3	-5.3	Spring	0
487	2011-11-01	Dusk	18	288	2	144	13.3	130.7	Spring	1
492	2011-11-02	Dusk	1	16	3	5.33333	3.7	1.63333	Spring	1
497	2011-11-03	Dusk	0	0	3	0	18.7	-18.7	Spring	0
502	2011-11-04	Dusk	0	0	3	0	7.7	-7.7	Spring	0
507	2011-11-05	Dusk	0	0	2	0	0.7	-0.7	Spring	0
512	2011-11-06	Dusk	0	0	3	0	2.3	-2.3	Spring	0
517	2011-11-07	Dusk	4	64	3	21.3333	10	11.3333	Spring	1
522	2011-11-08	Dusk	0	0	3	0	12	-12	Spring	0
527	2011-11-09	Dusk	0	0	3	0	1.3	-1.3	Spring	0
532	2011-11-10	Dusk	0	0	3	0	6	-6	Spring	0
537	2011-11-11	Dusk	4	64	3	21.3333	12.7	8.63333	Spring	1
542	2011-11-12	Dusk	0	0	3	0	5.7	-5.7	Spring	0
547	2011-11-13	Dusk	14	224	3	74.6667	13.3	61.3667	Spring	1
552	2011-11-14	Dusk	0	0	3	0	25	-25	Spring	0
557	2011-11-15	Dusk	14	224	3	74.6667	6.7	67.9667	Spring	1
562	2011-11-16	Dusk	0	0	3	0	2	-2	Spring	0
567	2011-11-17	Dusk	4	64	3	21.3333	5.7	15.6333	Spring	1
572	2011-11-18	Dusk	5	80	3	26.6667	4.7	21.9667	Spring	1
577	2011-11-19	Dusk	5	80	4	20	6	14	Spring	1
582	2011-11-20	Dusk	0	0	4	0	0	0	Spring	0
587	2011-11-21	Dusk	0	0	4	0	0	0	Spring	0
592	2011-11-22	Dusk	0	0	3	0	0	0	Spring	0
597	2011-11-23	Dusk	0	0	3	0	0	0	Spring	0
602	2011-11-24	Dusk	0	0	3	0	0	0	Spring	0
607	2011-11-25	Dusk	0	0	3	0	0	0	Spring	0
612	2011-11-26	Dusk	0	0	3	0	0	0	Spring	0
617	2011-11-27	Dusk	0	0	3	0	0	0	Spring	0
622	2011-11-28	Dusk	0	0	3	0	1.3	-1.3	Spring	0
627	2011-11-29	Dusk	0	0	3	0	4	-4	Spring	0
632	2011-11-30	Dusk	3	48	3	16	5	11	Spring	1
637	2011-12-01	Dusk	0	0	4	0	6.7	-6.7	Summer	0
642	2011-12-02	Dusk	0	0	4	0	0	0	Summer	0
647	2011-12-03	Dusk	0	0	4	0	0	0	Summer	0
652	2011-12-04	Dusk	0	0	4	0	0	0	Summer	0
657	2011-12-05	Dusk	0	0	4	0	0	0	Summer	0
662	2011-12-06	Dusk	0	0	4	0	0	0	Summer	0
667	2011-12-07	Dusk	0	0	4	0	0	0	Summer	0
672	2011-12-08	Dusk	0	0	4	0	0	0	Summer	0
677	2011-12-09	Dusk	0	0	4	0	0	0	Summer	0
682	2011-12-10	Dusk	0	0	4	0	0	0	Summer	0
687	2011-12-11	Dusk	0	0	4	0	0	0	Summer	0
692	2011-12-12	Dusk	0	0	4	0	0	0	Summer	0
697	2011-12-13	Dusk	0	0	4	0	0	0	Summer	0
702	2011-12-14	Dusk	0	0	4	0	0	0	Summer	0
707	2011-12-15	Dusk	0	0	4	0	0	0	Summer	0
712	2011-12-16	Dusk	0	0	3	0	0	0	Summer	0
717	2011-12-17	Dusk	0	0	3	0	0	0	Summer	0
722	2011-12-18	Dusk	0	0	3	0	0	0	Summer	0
727	2011-12-19	Dusk	0	0	4	0	0	0	Summer	0
732	2011-12-20	Dusk	0	0	3	0	0	0	Summer	0
737	2011-12-21	Dusk	0	0	4	0	0	0	Summer	0
742	2011-12-22	Dusk	0	0	4	0	0	0	Summer	0
747	2011-12-23	Dusk	5	80	4	20	1.7	18.3	Summer	1
752	2011-12-24	Dusk	0	0	4	0	6.3	-6.3	Summer	0
757	2011-12-25	Dusk	0	0	4	0	0	0	Summer	0
762	2011-12-26	Dusk	0	0	4	0	0	0	Summer	0
767	2011-12-27	Dusk	0	0	4	0	0	0	Summer	0
772	2011-12-28	Dusk	0	0	4	0	0	0	Summer	0
777	2011-12-29	Dusk	0	0	4	0	0	0	Summer	0
782	2011-12-30	Dusk	0	0	3	0	0	0	Summer	0
787	2011-12-31	Dusk	0	0	4	0	0	0	Summer	0
792	2012-01-01	Dusk	0	0	4	0	0	0	Summer	0
797	2012-01-02	Dusk	0	0	3	0	0	0	Summer	0
802	2012-01-03	Dusk	0	0	3	0	0	0	Summer	0
807	2012-01-04	Dusk	0	0	4	0	0	0	Summer	0
812	2012-01-05	Dusk	0	0	3	0	0	0	Summer	0
817	2012-01-06	Dusk	0	0	3	0	0	0	Summer	0
822	2012-01-07	Dusk	0	0	3	0	0	0	Summer	0
827	2012-01-08	Dusk	0	0	3	0	0	0	Summer	0
832	2012-01-09	Dusk	0	0	3	0	0	0	Summer	0
837	2012-01-10	Dusk	0	0	3	0	0	0	Summer	0
842	2012-01-11	Dusk	0	0	3	0	0	0	Summer	0
847	2012-01-12	Dusk	0	0	3	0	0	0	Summer	0
852	2012-01-13	Dusk	0	0	3	0	0	0	Summer	0
857	2012-01-14	Dusk	0	0	3	0	0	0	Summer	0
862	2012-01-15	Dusk	0	0	3	0	0	0	Summer	0
867	2012-01-16	Dusk	0	0	4	0	0	0	Summer	0
872	2012-01-17	Dusk	0	0	4	0	0	0	Summer	0
877	2012-01-18	Dusk	0	0	4	0	0	0	Summer	0
882	2012-01-19	Dusk	0	0	4	0	0	0	Summer	0
887	2012-01-20	Dusk	0	0	4	0	0	0	Summer	0
892	2012-01-21	Dusk	0	0	4	0	0	0	Summer	0
897	2012-01-22	Dusk	0	0	4	0	0	0	Summer	0
902	2012-01-23	Dusk	0	0	4	0	0	0	Summer	0
907	2012-01-24	Dusk	0	0	3	0	0	0	Summer	0
912	2012-01-25	Dusk	0	0	3	0	0	0	Summer	0
917	2012-01-26	Dusk	0	0	3	0	0	0	Summer	0
922	2012-01-27	Dusk	0	0	3	0	0	0	Summer	0
927	2012-01-28	Dusk	0	0	3	0	0	0	Summer	0
932	2012-01-29	Dusk	0	0	3	0	0	0	Summer	0
937	2012-01-30	Dusk	0	0	3	0	0	0	Summer	0
942	2012-01-31	Dusk	0	0	3	0	0	0	Summer	0
947	2012-02-01	Dusk	0	0	3	0	0	0	Summer	0
952	2012-02-02	Dusk	0	0	3	0	0	0	Summer	0
957	2012-02-03	Dusk	0	0	3	0	0	0	Summer	0
962	2012-02-04	Dusk	0	0	3	0	0	0	Summer	0
967	2012-02-05	Dusk	0	0	3	0	0	0	Summer	0
972	2012-02-06	Dusk	0	0	3	0	0	0	Summer	0
977	2012-02-07	Dusk	0	0	3	0	0	0	Summer	0
982	2012-02-08	Dusk	0	0	3	0	0	0	Summer	0
987	2012-02-09	Dusk	0	0	3	0	0	0	Summer	0
992	2012-02-10	Dusk	0	0	3	0	0	0	Summer	0
997	2012-02-11	Dusk	0	0	3	0	0	0	Summer	0
1002	2012-02-12	Dusk	0	0	3	0	0	0	Summer	0
1007	2012-02-13	Dusk	0	0	3	0	0	0	Summer	0
1012	2012-02-14	Dusk	0	0	3	0	0	0	Summer	0
1017	2012-02-15	Dusk	0	0	3	0	0	0	Summer	0
1022	2012-02-16	Dusk	0	0	3	0	0	0	Summer	0
1027	2012-02-17	Dusk	0	0	3	0	0	0	Summer	0
1032	2012-02-18	Dusk	0	0	3	0	0	0	Summer	0
1037	2012-02-19	Dusk	0	0	2	0	0	0	Summer	0
1042	2012-02-20	Dusk	0	0	2	0	0	0	Summer	0
1047	2012-02-21	Dusk	0	0	2	0	0	0	Summer	0
1052	2012-02-22	Dusk	0	0	2	0	0	0	Summer	0
1057	2012-02-23	Dusk	0	0	2	0	0	0	Summer	0
1062	2012-02-24	Dusk	0	0	2	0	0	0	Summer	0
1067	2012-02-25	Dusk	0	0	3	0	0	0	Summer	0
1072	2012-02-26	Dusk	0	0	3	0	0.7	-0.7	Summer	0
1077	2012-02-27	Dusk	0	0	3	0	0	0	Summer	0
1082	2012-02-28	Dusk	0	0	3	0	0	0	Summer	0
1087	2012-02-29	Dusk	0	0	3	0	0	0	Summer	0
1097	2012-03-02	Dusk	0	0	3	0	0	0	Autumn	0
1102	2012-03-03	Dusk	0	0	2	0	0	0	Autumn	0
1107	2012-03-04	Dusk	0	0	2	0	0	0	Autumn	0
1112	2012-03-05	Dusk	0	0	2	0	0	0	Autumn	0
1117	2012-03-06	Dusk	0	0	2	0	0	0	Autumn	0
1122	2012-03-07	Dusk	0	0	2	0	0	0	Autumn	0
1127	2012-03-08	Dusk	0	0	2	0	0	0	Autumn	0
1132	2012-03-09	Dusk	0	0	3	0	0	0	Autumn	0
1137	2012-03-10	Dusk	0	0	3	0	0	0	Autumn	0
1142	2012-03-11	Dusk	0	0	3	0	0	0	Autumn	0
1147	2012-03-12	Dusk	0	0	3	0	0	0	Autumn	0
1152	2012-03-13	Dusk	0	0	3	0	0	0	Autumn	0
1157	2012-03-14	Dusk	0	0	3	0	0	0	Autumn	0
1162	2012-03-15	Dusk	0	0	2	0	0	0	Autumn	0
1167	2012-03-16	Dusk	0	0	2	0	0	0	Autumn	0
1172	2012-03-17	Dusk	0	0	2	0	0	0	Autumn	0
1177	2012-03-18	Dusk	0	0	2	0	0	0	Autumn	0
1182	2012-03-19	Dusk	0	0	2	0	0	0	Autumn	0
1187	2012-03-20	Dusk	0	0	2	0	8.7	-8.7	Autumn	0
1192	2012-03-21	Dusk	0	0	2	0	0	0	Autumn	0
1197	2012-03-22	Dusk	0	0	2	0	0	0	Autumn	0
1202	2012-03-23	Dusk	0	0	3	0	0	0	Autumn	0
1207	2012-03-24	Dusk	0	0	3	0	0	0	Autumn	0
1212	2012-03-25	Dusk	0	0	3	0	0	0	Autumn	0
1217	2012-03-26	Dusk	0	0	3	0	0	0	Autumn	0
1222	2012-03-27	Dusk	0	0	3	0	0	0	Autumn	0
1227	2012-03-28	Dusk	0	0	2	0	0	0	Autumn	0
1232	2012-03-29	Dusk	0	0	2	0	0	0	Autumn	0
1237	2012-03-30	Dusk	0	0	2	0	0	0	Autumn	0
1242	2012-03-31	Dusk	0	0	2	0	0	0	Autumn	0
1247	2012-04-01	Dusk	0	0	2	0	0	0	Autumn	0
1252	2012-04-02	Dusk	0	0	2	0	0	0	Autumn	0
1257	2012-04-03	Dusk	0	0	2	0	0	0	Autumn	0
1262	2012-04-04	Dusk	0	0	2	0	0	0	Autumn	0
1267	2012-04-05	Dusk	0	0	3	0	0	0	Autumn	0
1272	2012-04-06	Dusk	0	0	3	0	0	0	Autumn	0
1277	2012-04-07	Dusk	0	0	3	0	0	0	Autumn	0
1282	2012-04-08	Dusk	0	0	3	0	0	0	Autumn	0
1287	2012-04-09	Dusk	0	0	3	0	0	0	Autumn	0
1292	2012-04-10	Dusk	0	0	3	0	0	0	Autumn	0
1297	2012-04-11	Dusk	0	0	2	0	0	0	Autumn	0
1302	2012-04-12	Dusk	0	0	2	0	0	0	Autumn	0
1307	2012-04-13	Dusk	0	0	2	0	0	0	Autumn	0
1312	2012-04-14	Dusk	0	0	2	0	0	0	Autumn	0
1317	2012-04-15	Dusk	0	0	2	0	8	-8	Autumn	0
1322	2012-04-16	Dusk	0	0	2	0	0	0	Autumn	0
1327	2012-04-17	Dusk	0	0	2	0	0	0	Autumn	0
1332	2012-04-18	Dusk	0	0	2	0	0	0	Autumn	0
1337	2012-04-19	Dusk	0	0	2	0	0	0	Autumn	0
1342	2012-04-20	Dusk	0	0	3	0	0	0	Autumn	0
1347	2012-04-21	Dusk	0	0	3	0	0	0	Autumn	0
1352	2012-04-22	Dusk	1	16	3	5.33333	0.3	5.03333	Autumn	1
1357	2012-04-23	Dusk	0	0	3	0	0	0	Autumn	0
1362	2012-04-24	Dusk	0	0	3	0	1.3	-1.3	Autumn	0
1367	2012-04-25	Dusk	0	0	3	0	0	0	Autumn	0
1372	2012-04-26	Dusk	0	0	3	0	0	0	Autumn	0
1377	2012-04-27	Dusk	0	0	2	0	0	0	Autumn	0
1382	2012-04-28	Dusk	0	0	3	0	0	0	Autumn	0
1387	2012-04-29	Dusk	0	0	2	0	0	0	Autumn	0
1392	2012-04-30	Dusk	0	0	2	0	0	0	Autumn	0
1397	2012-05-01	Dusk	0	0	2	0	0	0	Autumn	0
1402	2012-05-02	Dusk	0	0	2	0	0	0	Autumn	0
1407	2012-05-03	Dusk	0	0	2	0	0	0	Autumn	0
1412	2012-05-04	Dusk	0	0	2	0	1.7	-1.7	Autumn	0
1417	2012-05-05	Dusk	3	48	3	16	9.3	6.7	Autumn	1
1422	2012-05-06	Dusk	0	0	3	0	13	-13	Autumn	0
1427	2012-05-07	Dusk	0	0	3	0	1.7	-1.7	Autumn	0
1432	2012-05-08	Dusk	0	0	3	0	0	0	Autumn	0
1437	2012-05-09	Dusk	0	0	3	0	1.7	-1.7	Autumn	0
1442	2012-05-10	Dusk	4	64	3	21.3333	23	-1.66667	Autumn	1
1447	2012-05-11	Dusk	0	0	3	0	0	0	Autumn	0
1452	2012-05-12	Dusk	0	0	3	0	3.7	-3.7	Autumn	0
1457	2012-05-13	Dusk	0	0	3	0	14.7	-14.7	Autumn	0
1462	2012-05-14	Dusk	24	384	3	128	54.7	73.3	Autumn	1
1467	2012-05-15	Dusk	4	64	3	21.3333	26.7	-5.36667	Autumn	1
1472	2012-05-16	Dusk	0	0	3	0	22	-22	Autumn	0
1477	2012-05-17	Dusk	23	368	3	122.667	47.3	75.3667	Autumn	1
1482	2012-05-18	Dusk	1	16	2	8	37.7	-29.7	Autumn	1
1487	2012-05-19	Dusk	32	512	2	256	53.3	202.7	Autumn	1
1492	2012-05-20	Dusk	18	288	2	144	72.3	71.7	Autumn	1
1497	2012-05-21	Dusk	18	288	3	96	63.3	32.7	Autumn	1
1502	2012-05-22	Dusk	29	464	2	232	174.3	57.7	Autumn	1
1507	2012-05-23	Dusk	19	304	2	152	267	-115	Autumn	1
5	2011-07-23	Morning	20	480	8	60	198.5	-138.5	Winter	1
10	2011-07-24	Morning	66	1584	8	198	294	-96	Winter	1
15	2011-07-25	Morning	50	1200	8	150	243	-93	Winter	1
20	2011-07-26	Morning	40	120	8	15	160.5	-145.5	Winter	1
25	2011-07-27	Morning	59	1416	8	177	161.5	15.5	Winter	1
30	2011-07-28	Morning	11	264	8	33	239.5	-206.5	Winter	1
35	2011-07-29	Morning	40	960	8	120	234.5	-114.5	Winter	1
40	2011-07-30	Morning	70	1680	8	210	128	82	Winter	1
45	2011-07-31	Morning	11	264	8	33	72.5	-39.5	Winter	1
50	2011-08-01	Morning	24	576	5	115.2	169	-53.8	Winter	1
55	2011-08-07	Morning	82	1312	9	145.778	283.7	-137.922	Winter	1
60	2011-08-08	Morning	70	1120	9	124.444	143	-18.5556	Winter	1
65	2011-08-09	Morning	28	448	9	49.7778	89.3	-39.5222	Winter	1
70	2011-08-10	Morning	43	688	9	76.4444	64	12.4444	Winter	1
75	2011-08-11	Morning	200	3200	9	355.556	361	-5.44444	Winter	1
80	2011-08-12	Morning	54	864	7	123.429	298	-174.571	Winter	1
85	2011-08-13	Morning	142	2272	9	252.444	258.7	-6.25556	Winter	1
90	2011-08-14	Morning	47	752	9	83.5556	104	-20.4444	Winter	1
95	2011-08-15	Morning	106	1696	9	188.444	152	36.4444	Winter	1
100	2011-08-16	Morning	136	2176	9	241.778	282	-40.2222	Winter	1
105	2011-08-17	Morning	154	2464	9	273.778	233.3	40.4778	Winter	1
110	2011-08-18	Morning	76	1216	10	121.6	356.7	-235.1	Winter	1
115	2011-08-19	Morning	237	3792	10	379.2	445.7	-66.5	Winter	1
120	2011-08-20	Morning	45	720	10	72	145.7	-73.7	Winter	1
125	2011-08-21	Morning	202	3232	10	323.2	323.7	-0.5	Winter	1
130	2011-08-22	Morning	50	800	10	80	207.3	-127.3	Winter	1
135	2011-08-23	Morning	50	800	10	80	111	-31	Winter	1
140	2011-08-24	Morning	44	704	10	70.4	199.3	-128.9	Winter	1
145	2011-08-25	Morning	80	1280	10	128	72	56	Winter	1
150	2011-08-26	Morning	164	2624	10	262.4	299.3	-36.9	Winter	1
155	2011-08-27	Morning	135	2160	10	216	263.7	-47.7	Winter	1
160	2011-08-28	Morning	10	160	11	14.5455	100.7	-86.1545	Winter	1
165	2011-08-29	Morning	140	2240	11	203.636	219.3	-15.6636	Winter	1
170	2011-08-30	Morning	194	3104	10	310.4	267.3	43.1	Winter	1
175	2011-08-31	Morning	51	816	10	81.6	156.7	-75.1	Winter	1
180	2011-09-01	Morning	43	688	11	62.5455	85.7	-23.1545	Spring	1
185	2011-09-02	Morning	2	32	11	2.90909	80.3	-77.3909	Spring	1
190	2011-09-03	Morning	15	240	11	21.8182	31.7	-9.88182	Spring	1
195	2011-09-04	Morning	13	208	11	18.9091	56	-37.0909	Spring	1
200	2011-09-05	Morning	45	720	11	65.4545	8	57.4545	Spring	1
205	2011-09-06	Morning	210	3360	11	305.455	273.3	32.1545	Spring	1
210	2011-09-07	Morning	18	288	11	26.1818	216	-189.818	Spring	1
215	2011-09-08	Morning	80	1280	11	116.364	135.7	-19.3364	Spring	1
220	2011-09-09	Morning	22	352	11	32	97	-65	Spring	1
225	2011-09-10	Morning	40	640	11	58.1818	110.7	-52.5182	Spring	1
230	2011-09-11	Morning	65	1040	11	94.5455	360	-265.455	Spring	1
235	2011-09-12	Morning	58	928	11	84.3636	204	-119.636	Spring	1
240	2011-09-13	Morning	50	800	11	72.7273	115.3	-42.5727	Spring	1
245	2011-09-14	Morning	49	784	11	71.2727	137.3	-66.0273	Spring	1
250	2011-09-15	Morning	57	912	11	82.9091	79.3	3.60909	Spring	1
255	2011-09-16	Morning	33	528	12	44	75	-31	Spring	1
260	2011-09-17	Morning	18	288	12	24	46.3	-22.3	Spring	1
265	2011-09-18	Morning	43	688	12	57.3333	60.3	-2.96667	Spring	1
270	2011-09-19	Morning	44	704	12	58.6667	82	-23.3333	Spring	1
275	2011-09-20	Morning	32	512	12	42.6667	544	-501.333	Spring	1
280	2011-09-21	Morning	22	352	12	29.3333	118.3	-88.9667	Spring	1
285	2011-09-22	Morning	37	592	12	49.3333	92.3	-42.9667	Spring	1
290	2011-09-23	Morning	10	160	12	13.3333	76.3	-62.9667	Spring	1
295	2011-09-24	Morning	18	288	12	24	91.7	-67.7	Spring	1
300	2011-09-25	Morning	1	16	12	1.33333	35.8	-34.4667	Spring	1
305	2011-09-26	Morning	5	80	12	6.66667	32	-25.3333	Spring	1
310	2011-09-27	Morning	2	32	12	2.66667	4.6	-1.93333	Spring	1
315	2011-09-28	Morning	0	0	12	0	18.7	-18.7	Spring	0
320	2011-09-29	Morning	32	512	13	39.3846	47.3	-7.91538	Spring	1
325	2011-09-30	Morning	0	0	13	0	20	-20	Spring	0
330	2011-10-01	Morning	0	0	13	0	0	0	Spring	0
335	2011-10-02	Morning	1	16	13	1.23077	18.3	-17.0692	Spring	1
340	2011-10-03	Morning	2	32	13	2.46154	39	-36.5385	Spring	1
345	2011-10-04	Morning	95	1520	13	116.923	87	29.9231	Spring	1
350	2011-10-05	Morning	13	208	8	26	25.7	0.3	Spring	1
355	2011-10-06	Morning	2	32	13	2.46154	1	1.46154	Spring	1
360	2011-10-07	Morning	0	0	13	0	1	-1	Spring	0
365	2011-10-08	Morning	11	176	13	13.5385	8	5.53846	Spring	1
370	2011-10-09	Morning	60	960	13	73.8462	111.3	-37.4538	Spring	1
375	2011-10-10	Morning	1	16	13	1.23077	18	-16.7692	Spring	1
380	2011-10-11	Morning	26	416	13	32	10.3	21.7	Spring	1
385	2011-10-12	Morning	3	48	13	3.69231	2.3	1.39231	Spring	1
390	2011-10-13	Morning	3	48	14	3.42857	6	-2.57143	Spring	1
395	2011-10-14	Morning	56	896	14	64	26	38	Spring	1
400	2011-10-15	Morning	19	304	15	20.2667	13.3	6.96667	Spring	1
405	2011-10-16	Morning	0	0	15	0	7	-7	Spring	0
410	2011-10-17	Morning	0	0	15	0	0	0	Spring	0
415	2011-10-18	Morning	0	0	15	0	4.3	-4.3	Spring	0
420	2011-10-19	Morning	0	0	15	0	12	-12	Spring	0
425	2011-10-20	Morning	4	64	14	4.57143	6	-1.42857	Spring	1
430	2011-10-21	Morning	0	0	15	0	7.3	-7.3	Spring	0
435	2011-10-22	Morning	39	624	14	44.5714	31	13.5714	Spring	1
440	2011-10-23	Morning	33	528	14	37.7143	38	-0.285714	Spring	1
445	2011-10-24	Morning	36	576	14	41.1429	67	-25.8571	Spring	1
450	2011-10-25	Morning	139	2224	14	158.857	123.3	35.5571	Spring	1
455	2011-10-26	Morning	8	128	14	9.14286	41	-31.8571	Spring	1
460	2011-10-27	Morning	44	704	15	46.9333	33.7	13.2333	Spring	1
465	2011-10-28	Morning	9	144	15	9.6	17.7	-8.1	Spring	1
470	2011-10-29	Morning	6	96	15	6.4	8.3	-1.9	Spring	1
475	2011-10-30	Morning	55	880	15	58.6667	51.3	7.36667	Spring	1
480	2011-10-31	Morning	8	128	16	8	5.3	2.7	Spring	1
485	2011-11-01	Morning	6	96	15	6.4	13.3	-6.9	Spring	1
490	2011-11-02	Morning	8	128	15	8.53333	3.7	4.83333	Spring	1
495	2011-11-03	Morning	12	192	15	12.8	18.7	-5.9	Spring	1
500	2011-11-04	Morning	7	112	15	7.46667	7.7	-0.233333	Spring	1
505	2011-11-05	Morning	0	0	15	0	0.7	-0.7	Spring	0
510	2011-11-06	Morning	0	0	16	0	2.3	-2.3	Spring	0
515	2011-11-07	Morning	0	0	16	0	10	-10	Spring	0
520	2011-11-08	Morning	1	16	15	1.06667	12	-10.9333	Spring	1
525	2011-11-09	Morning	2	32	15	2.13333	1.3	0.833333	Spring	1
530	2011-11-10	Morning	0	0	15	0	6	-6	Spring	0
535	2011-11-11	Morning	19	304	15	20.2667	12.7	7.56667	Spring	1
540	2011-11-12	Morning	8	128	15	8.53333	5.7	2.83333	Spring	1
545	2011-11-13	Morning	17	272	15	18.1333	13.3	4.83333	Spring	1
550	2011-11-14	Morning	0	0	16	0	25	-25	Spring	0
555	2011-11-15	Morning	5	80	16	5	6.7	-1.7	Spring	1
560	2011-11-16	Morning	0	0	16	0	2	-2	Spring	0
565	2011-11-17	Morning	2	32	16	2	5.7	-3.7	Spring	1
570	2011-11-18	Morning	0	0	16	0	4.7	-4.7	Spring	0
575	2011-11-19	Morning	2	32	16	2	6	-4	Spring	1
580	2011-11-20	Morning	0	0	16	0	0	0	Spring	0
585	2011-11-21	Morning	0	0	16	0	0	0	Spring	0
590	2011-11-22	Morning	0	0	16	0	0	0	Spring	0
595	2011-11-23	Morning	0	0	16	0	0	0	Spring	0
600	2011-11-24	Morning	0	0	16	0	0	0	Spring	0
605	2011-11-25	Morning	0	0	16	0	0	0	Spring	0
610	2011-11-26	Morning	0	0	16	0	0	0	Spring	0
615	2011-11-27	Morning	0	0	16	0	0	0	Spring	0
620	2011-11-28	Morning	0	0	16	0	1.3	-1.3	Spring	0
625	2011-11-29	Morning	0	0	16	0	4	-4	Spring	0
630	2011-11-30	Morning	2	32	17	1.88235	5	-3.11765	Spring	1
635	2011-12-01	Morning	0	0	16	0	6.7	-6.7	Summer	0
640	2011-12-02	Morning	0	0	16	0	0	0	Summer	0
645	2011-12-03	Morning	0	0	16	0	0	0	Summer	0
650	2011-12-04	Morning	0	0	16	0	0	0	Summer	0
655	2011-12-05	Morning	0	0	16	0	0	0	Summer	0
660	2011-12-06	Morning	0	0	16	0	0	0	Summer	0
665	2011-12-07	Morning	0	0	16	0	0	0	Summer	0
670	2011-12-08	Morning	0	0	16	0	0	0	Summer	0
675	2011-12-09	Morning	0	0	16	0	0	0	Summer	0
680	2011-12-10	Morning	0	0	16	0	0	0	Summer	0
685	2011-12-11	Morning	0	0	16	0	0	0	Summer	0
690	2011-12-12	Morning	0	0	16	0	0	0	Summer	0
695	2011-12-13	Morning	0	0	16	0	0	0	Summer	0
700	2011-12-14	Morning	0	0	16	0	0	0	Summer	0
705	2011-12-15	Morning	0	0	16	0	0	0	Summer	0
710	2011-12-16	Morning	0	0	16	0	0	0	Summer	0
715	2011-12-17	Morning	0	0	16	0	0	0	Summer	0
720	2011-12-18	Morning	0	0	16	0	0	0	Summer	0
725	2011-12-19	Morning	0	0	16	0	0	0	Summer	0
730	2011-12-20	Morning	0	0	16	0	0	0	Summer	0
735	2011-12-21	Morning	0	0	16	0	0	0	Summer	0
740	2011-12-22	Morning	0	0	16	0	0	0	Summer	0
745	2011-12-23	Morning	0	0	16	0	1.7	-1.7	Summer	0
750	2011-12-24	Morning	11	176	16	11	6.3	4.7	Summer	1
755	2011-12-25	Morning	0	0	16	0	0	0	Summer	0
760	2011-12-26	Morning	0	0	16	0	0	0	Summer	0
765	2011-12-27	Morning	0	0	16	0	0	0	Summer	0
770	2011-12-28	Morning	0	0	16	0	0	0	Summer	0
775	2011-12-29	Morning	0	0	16	0	0	0	Summer	0
780	2011-12-30	Morning	0	0	16	0	0	0	Summer	0
785	2011-12-31	Morning	0	0	16	0	0	0	Summer	0
790	2012-01-01	Morning	0	0	16	0	0	0	Summer	0
795	2012-01-02	Morning	0	0	16	0	0	0	Summer	0
800	2012-01-03	Morning	0	0	16	0	0	0	Summer	0
805	2012-01-04	Morning	0	0	16	0	0	0	Summer	0
810	2012-01-05	Morning	0	0	16	0	0	0	Summer	0
815	2012-01-06	Morning	0	0	16	0	0	0	Summer	0
820	2012-01-07	Morning	0	0	16	0	0	0	Summer	0
825	2012-01-08	Morning	0	0	16	0	0	0	Summer	0
830	2012-01-09	Morning	0	0	16	0	0	0	Summer	0
835	2012-01-10	Morning	0	0	16	0	0	0	Summer	0
840	2012-01-11	Morning	0	0	16	0	0	0	Summer	0
845	2012-01-12	Morning	0	0	17	0	0	0	Summer	0
850	2012-01-13	Morning	0	0	16	0	0	0	Summer	0
855	2012-01-14	Morning	0	0	16	0	0	0	Summer	0
860	2012-01-15	Morning	0	0	16	0	0	0	Summer	0
865	2012-01-16	Morning	0	0	16	0	0	0	Summer	0
870	2012-01-17	Morning	0	0	16	0	0	0	Summer	0
875	2012-01-18	Morning	0	0	15	0	0	0	Summer	0
880	2012-01-19	Morning	0	0	16	0	0	0	Summer	0
885	2012-01-20	Morning	0	0	15	0	0	0	Summer	0
890	2012-01-21	Morning	0	0	16	0	0	0	Summer	0
895	2012-01-22	Morning	0	0	16	0	0	0	Summer	0
900	2012-01-23	Morning	0	0	16	0	0	0	Summer	0
905	2012-01-24	Morning	0	0	16	0	0	0	Summer	0
910	2012-01-25	Morning	0	0	16	0	0	0	Summer	0
915	2012-01-26	Morning	0	0	16	0	0	0	Summer	0
920	2012-01-27	Morning	0	0	16	0	0	0	Summer	0
925	2012-01-28	Morning	0	0	16	0	0	0	Summer	0
930	2012-01-29	Morning	0	0	15	0	0	0	Summer	0
935	2012-01-30	Morning	0	0	16	0	0	0	Summer	0
940	2012-01-31	Morning	0	0	13	0	0	0	Summer	0
945	2012-02-01	Morning	0	0	15	0	0	0	Summer	0
950	2012-02-02	Morning	0	0	15	0	0	0	Summer	0
955	2012-02-03	Morning	0	0	15	0	0	0	Summer	0
960	2012-02-04	Morning	0	0	15	0	0	0	Summer	0
965	2012-02-05	Morning	0	0	15	0	0	0	Summer	0
970	2012-02-06	Morning	0	0	15	0	0	0	Summer	0
975	2012-02-07	Morning	0	0	15	0	0	0	Summer	0
980	2012-02-08	Morning	0	0	15	0	0	0	Summer	0
985	2012-02-09	Morning	0	0	15	0	0	0	Summer	0
990	2012-02-10	Morning	0	0	15	0	0	0	Summer	0
995	2012-02-11	Morning	0	0	15	0	0	0	Summer	0
1000	2012-02-12	Morning	0	0	15	0	0	0	Summer	0
1005	2012-02-13	Morning	0	0	15	0	0	0	Summer	0
1010	2012-02-14	Morning	0	0	15	0	0	0	Summer	0
1015	2012-02-15	Morning	0	0	15	0	0	0	Summer	0
1020	2012-02-16	Morning	0	0	15	0	0	0	Summer	0
1025	2012-02-17	Morning	0	0	14	0	0	0	Summer	0
1030	2012-02-18	Morning	0	0	14	0	0	0	Summer	0
1035	2012-02-19	Morning	0	0	14	0	0	0	Summer	0
1040	2012-02-20	Morning	0	0	14	0	0	0	Summer	0
1045	2012-02-21	Morning	0	0	14	0	0	0	Summer	0
1050	2012-02-22	Morning	0	0	14	0	0	0	Summer	0
1055	2012-02-23	Morning	0	0	14	0	0	0	Summer	0
1060	2012-02-24	Morning	0	0	14	0	0	0	Summer	0
1065	2012-02-25	Morning	0	0	14	0	0	0	Summer	0
1070	2012-02-26	Morning	3	48	14	3.42857	0.7	2.72857	Summer	1
1075	2012-02-27	Morning	0	0	14	0	0	0	Summer	0
1080	2012-02-28	Morning	0	0	14	0	0	0	Summer	0
1085	2012-02-29	Morning	0	0	14	0	0	0	Summer	0
1095	2012-03-02	Morning	0	0	14	0	0	0	Autumn	0
1100	2012-03-03	Morning	0	0	14	0	0	0	Autumn	0
1105	2012-03-04	Morning	0	0	14	0	0	0	Autumn	0
1110	2012-03-05	Morning	0	0	13	0	0	0	Autumn	0
1115	2012-03-06	Morning	0	0	13	0	0	0	Autumn	0
1120	2012-03-07	Morning	0	0	13	0	0	0	Autumn	0
1125	2012-03-08	Morning	0	0	13	0	0	0	Autumn	0
1130	2012-03-09	Morning	0	0	13	0	0	0	Autumn	0
1135	2012-03-10	Morning	0	0	13	0	0	0	Autumn	0
1140	2012-03-11	Morning	0	0	13	0	0	0	Autumn	0
1145	2012-03-12	Morning	0	0	13	0	0	0	Autumn	0
1150	2012-03-13	Morning	0	0	13	0	0	0	Autumn	0
1155	2012-03-14	Morning	0	0	13	0	0	0	Autumn	0
1160	2012-03-15	Morning	0	0	13	0	0	0	Autumn	0
1165	2012-03-16	Morning	0	0	13	0	0	0	Autumn	0
1170	2012-03-17	Morning	0	0	13	0	0	0	Autumn	0
1175	2012-03-18	Morning	0	0	13	0	0	0	Autumn	0
1180	2012-03-19	Morning	0	0	13	0	0	0	Autumn	0
1185	2012-03-20	Morning	0	0	13	0	8.7	-8.7	Autumn	0
1190	2012-03-21	Morning	0	0	13	0	0	0	Autumn	0
1195	2012-03-22	Morning	0	0	13	0	0	0	Autumn	0
1200	2012-03-23	Morning	0	0	12	0	0	0	Autumn	0
1205	2012-03-24	Morning	0	0	11	0	0	0	Autumn	0
1210	2012-03-25	Morning	0	0	11	0	0	0	Autumn	0
1215	2012-03-26	Morning	0	0	11	0	0	0	Autumn	0
1220	2012-03-27	Morning	0	0	11	0	0	0	Autumn	0
1225	2012-03-28	Morning	0	0	11	0	0	0	Autumn	0
1230	2012-03-29	Morning	0	0	11	0	0	0	Autumn	0
1235	2012-03-30	Morning	0	0	11	0	0	0	Autumn	0
1240	2012-03-31	Morning	0	0	11	0	0	0	Autumn	0
1245	2012-04-01	Morning	0	0	11	0	0	0	Autumn	0
1250	2012-04-02	Morning	0	0	12	0	0	0	Autumn	0
1255	2012-04-03	Morning	0	0	12	0	0	0	Autumn	0
1260	2012-04-04	Morning	0	0	11	0	0	0	Autumn	0
1265	2012-04-05	Morning	0	0	11	0	0	0	Autumn	0
1270	2012-04-06	Morning	0	0	11	0	0	0	Autumn	0
1275	2012-04-07	Morning	0	0	11	0	0	0	Autumn	0
1280	2012-04-08	Morning	0	0	11	0	0	0	Autumn	0
1285	2012-04-09	Morning	0	0	10	0	0	0	Autumn	0
1290	2012-04-10	Morning	0	0	11	0	0	0	Autumn	0
1295	2012-04-11	Morning	0	0	10	0	0	0	Autumn	0
1300	2012-04-12	Morning	0	0	10	0	0	0	Autumn	0
1305	2012-04-13	Morning	0	0	10	0	0	0	Autumn	0
1310	2012-04-14	Morning	0	0	10	0	0	0	Autumn	0
1315	2012-04-15	Morning	0	0	10	0	8	-8	Autumn	0
1320	2012-04-16	Morning	0	0	10	0	0	0	Autumn	0
1325	2012-04-17	Morning	0	0	10	0	0	0	Autumn	0
1330	2012-04-18	Morning	0	0	10	0	0	0	Autumn	0
1335	2012-04-19	Morning	0	0	10	0	0	0	Autumn	0
1340	2012-04-20	Morning	0	0	10	0	0	0	Autumn	0
1345	2012-04-21	Morning	0	0	10	0	0	0	Autumn	0
1350	2012-04-22	Morning	0	0	10	0	0.3	-0.3	Autumn	0
1355	2012-04-23	Morning	0	0	10	0	0	0	Autumn	0
1360	2012-04-24	Morning	0	0	10	0	1.3	-1.3	Autumn	0
1365	2012-04-25	Morning	0	0	10	0	0	0	Autumn	0
1370	2012-04-26	Morning	0	0	10	0	0	0	Autumn	0
1375	2012-04-27	Morning	0	0	10	0	0	0	Autumn	0
1380	2012-04-28	Morning	0	0	9	0	0	0	Autumn	0
1385	2012-04-29	Morning	0	0	10	0	0	0	Autumn	0
1390	2012-04-30	Morning	0	0	9	0	0	0	Autumn	0
1395	2012-05-01	Morning	0	0	9	0	0	0	Autumn	0
1400	2012-05-02	Morning	0	0	9	0	0	0	Autumn	0
1405	2012-05-03	Morning	0	0	9	0	0	0	Autumn	0
1410	2012-05-04	Morning	0	0	9	0	1.7	-1.7	Autumn	0
1415	2012-05-05	Morning	0	0	9	0	9.3	-9.3	Autumn	0
1420	2012-05-06	Morning	26	416	9	46.2222	13	33.2222	Autumn	1
1425	2012-05-07	Morning	0	0	9	0	1.7	-1.7	Autumn	0
1430	2012-05-08	Morning	0	0	9	0	0	0	Autumn	0
1435	2012-05-09	Morning	0	0	9	0	1.7	-1.7	Autumn	0
1440	2012-05-10	Morning	14	224	9	24.8889	23	1.88889	Autumn	1
1445	2012-05-11	Morning	0	0	9	0	0	0	Autumn	0
1450	2012-05-12	Morning	9	144	9	16	3.7	12.3	Autumn	1
1455	2012-05-13	Morning	22	352	9	39.1111	14.7	24.4111	Autumn	1
1460	2012-05-14	Morning	0	0	9	0	54.7	-54.7	Autumn	0
1465	2012-05-15	Morning	4	64	9	7.11111	26.7	-19.5889	Autumn	1
1470	2012-05-16	Morning	21	336	9	37.3333	22	15.3333	Autumn	1
1475	2012-05-17	Morning	20	320	9	35.5556	47.3	-11.7444	Autumn	1
1480	2012-05-18	Morning	30	480	9	53.3333	37.7	15.6333	Autumn	1
1485	2012-05-19	Morning	55	880	9	97.7778	53.3	44.4778	Autumn	1
1490	2012-05-20	Morning	50	800	9	88.8889	72.3	16.5889	Autumn	1
1495	2012-05-21	Morning	4	64	8	8	63.3	-55.3	Autumn	1
1500	2012-05-22	Morning	80	1280	8	160	174.3	-14.3	Autumn	1
1505	2012-05-23	Morning	154	2464	8	308	267	41	Autumn	1
1510	2012-05-24	Morning	6	96	1	96	171.8	-75.8	Autumn	1
3	2011-07-22	Night	200	4800	25	192	222.9	-30.9	Winter	1
8	2011-07-23	Night	383	9192	25	367.68	198.5	169.18	Winter	1
13	2011-07-24	Night	330	7920	25	316.8	294	22.8	Winter	1
18	2011-07-25	Night	200	4800	25	192	243	-51	Winter	1
23	2011-07-26	Night	158	3792	25	151.68	160.5	-8.82	Winter	1
28	2011-07-27	Night	140	3360	25	134.4	161.5	-27.1	Winter	1
33	2011-07-28	Night	524	12576	25	503.04	239.5	263.54	Winter	1
38	2011-07-29	Night	107	2568	25	102.72	234.5	-131.78	Winter	1
43	2011-07-30	Night	60	1440	25	57.6	128	-70.4	Winter	1
48	2011-07-31	Night	188	4512	25	180.48	72.5	107.98	Winter	1
53	2011-08-06	Night	963	15408	25	616.32	512	104.32	Winter	1
58	2011-08-07	Night	218	3488	25	139.52	283.7	-144.18	Winter	1
63	2011-08-08	Night	215	3440	25	137.6	143	-5.4	Winter	1
68	2011-08-09	Night	155	2480	24	24	89.3	-65.3	Winter	1
73	2011-08-10	Night	232	3712	24	154.667	64	90.6667	Winter	1
78	2011-08-11	Night	755	12080	24	503.333	361	142.333	Winter	1
83	2011-08-12	Night	475	7600	23	330.435	298	32.4348	Winter	1
88	2011-08-13	Night	204	3264	23	141.913	258.7	-116.787	Winter	1
93	2011-08-14	Night	153	2448	23	106.435	104	2.43478	Winter	1
98	2011-08-15	Night	476	7616	23	331.13	152	179.13	Winter	1
103	2011-08-16	Night	416	6656	23	289.391	282	7.3913	Winter	1
108	2011-08-17	Night	348	5568	23	242.087	233.3	8.78696	Winter	1
113	2011-08-18	Night	882	14112	23	613.565	356.7	256.865	Winter	1
118	2011-08-19	Night	431	6896	23	299.826	445.7	-145.874	Winter	1
123	2011-08-20	Night	402	6432	23	279.652	145.7	133.952	Winter	1
128	2011-08-21	Night	468	7488	23	325.565	323.7	1.86522	Winter	1
133	2011-08-22	Night	254	4064	22	184.727	207.3	-22.5727	Winter	1
138	2011-08-23	Night	183	2928	23	127.304	111	16.3043	Winter	1
143	2011-08-24	Night	266	4256	22	193.455	199.3	-5.84545	Winter	1
148	2011-08-25	Night	200	3200	23	139.13	72	67.1304	Winter	1
153	2011-08-26	Night	369	5904	22	268.364	299.3	-30.9364	Winter	1
158	2011-08-27	Night	316	5056	22	229.818	263.7	-33.8818	Winter	1
163	2011-08-28	Night	212	3392	22	154.182	100.7	53.4818	Winter	1
168	2011-08-29	Night	388	6208	22	282.182	219.3	62.8818	Winter	1
173	2011-08-30	Night	322	5152	22	234.182	267.3	-33.1182	Winter	1
178	2011-08-31	Night	224	3584	22	162.909	156.7	6.20909	Winter	1
183	2011-09-01	Night	136	2176	22	98.9091	85.7	13.2091	Spring	1
188	2011-09-02	Night	130	2080	21	99.0476	80.3	18.7476	Spring	1
193	2011-09-03	Night	115	1840	21	87.619	31.7	55.919	Spring	1
198	2011-09-04	Night	117	1872	21	89.1429	56	33.1429	Spring	1
203	2011-09-05	Night	225	3600	21	171.429	8	163.429	Spring	1
208	2011-09-06	Night	550	8800	21	419.048	273.3	145.748	Spring	1
213	2011-09-07	Night	157	2512	21	119.619	216	-96.381	Spring	1
218	2011-09-08	Night	181	2896	21	137.905	135.7	2.20476	Spring	1
223	2011-09-09	Night	109	1744	20	87.2	97	-9.8	Spring	1
228	2011-09-10	Night	260	4160	20	208	110.7	97.3	Spring	1
233	2011-09-11	Night	287	4592	20	229.6	360	-130.4	Spring	1
238	2011-09-12	Night	383	6128	20	306.4	204	102.4	Spring	1
243	2011-09-13	Night	57	912	20	45.6	115.3	-69.7	Spring	1
248	2011-09-14	Night	138.19	2211.04	19	116.371	137.3	-20.9295	Spring	1
253	2011-09-15	Night	214	3424	20	171.2	79.3	91.9	Spring	1
258	2011-09-16	Night	116	1856	20	92.8	75	17.8	Spring	1
263	2011-09-17	Night	89	1424	20	71.2	46.3	24.9	Spring	1
268	2011-09-18	Night	153	2448	20	122.4	60.3	62.1	Spring	1
273	2011-09-19	Night	222	3552	20	177.6	82	95.6	Spring	1
278	2011-09-20	Night	65	1040	20	52	544	-492	Spring	1
283	2011-09-21	Night	264	4224	20	211.2	118.3	92.9	Spring	1
288	2011-09-22	Night	126	2016	19	106.105	92.3	13.8053	Spring	1
293	2011-09-23	Night	198	3168	18	176	76.3	99.7	Spring	1
298	2011-09-24	Night	79	1264	16	79	91.7	-12.7	Spring	1
303	2011-09-25	Night	51	816	18	45.3333	35.8	9.53333	Spring	1
308	2011-09-26	Night	2	32	18	1.77778	32	-30.2222	Spring	1
313	2011-09-27	Night	0	0	18	0	4.6	-4.6	Spring	0
318	2011-09-28	Night	138	2208	18	122.667	18.7	103.967	Spring	1
323	2011-09-29	Night	2	32	18	1.77778	47.3	-45.5222	Spring	1
328	2011-09-30	Night	20	320	18	17.7778	20	-2.22222	Spring	1
333	2011-10-01	Night	2	32	18	1.77778	0	1.77778	Spring	1
338	2011-10-02	Night	100	1600	18	88.8889	18.3	70.5889	Spring	1
343	2011-10-03	Night	86	1376	18	76.4444	39	37.4444	Spring	1
348	2011-10-04	Night	60	960	18	53.3333	87	-33.6667	Spring	1
353	2011-10-05	Night	0	0	17	0	25.7	-25.7	Spring	0
358	2011-10-06	Night	0	0	17	0	1	-1	Spring	0
363	2011-10-07	Night	17	272	34	8	1	7	Spring	1
368	2011-10-08	Night	53	848	7	121.143	8	113.143	Spring	1
373	2011-10-09	Night	115	1840	17	108.235	111.3	-3.06471	Spring	1
378	2011-10-10	Night	3	48	16	3	18	-15	Spring	1
383	2011-10-11	Night	0	0	16	0	10.3	-10.3	Spring	0
388	2011-10-12	Night	0	0	16	0	2.3	-2.3	Spring	0
393	2011-10-13	Night	15	240	16	15	6	9	Spring	1
398	2011-10-14	Night	0	0	15	0	26	-26	Spring	0
403	2011-10-15	Night	13	208	16	13	13.3	-0.3	Spring	1
408	2011-10-16	Night	1	16	16	1	7	-6	Spring	1
413	2011-10-17	Night	1	16	15	1.06667	0	1.06667	Spring	1
418	2011-10-18	Night	27	432	15	28.8	4.3	24.5	Spring	1
423	2011-10-19	Night	10	160	15	10.6667	12	-1.33333	Spring	1
428	2011-10-20	Night	0	0	15	0	6	-6	Spring	0
433	2011-10-21	Night	6	96	15	6.4	7.3	-0.9	Spring	1
438	2011-10-22	Night	49	784	15	52.2667	31	21.2667	Spring	1
443	2011-10-23	Night	57	912	15	60.8	38	22.8	Spring	1
448	2011-10-24	Night	105	1680	14	120	67	53	Spring	1
453	2011-10-25	Night	144	2304	14	164.571	123.3	41.2714	Spring	1
458	2011-10-26	Night	33	528	14	37.7143	41	-3.28571	Spring	1
463	2011-10-27	Night	14	224	14	16	33.7	-17.7	Spring	1
468	2011-10-28	Night	31	496	14	35.4286	17.7	17.7286	Spring	1
473	2011-10-29	Night	69	1104	14	78.8571	8.3	70.5571	Spring	1
478	2011-10-30	Night	3	48	13	3.69231	51.3	-47.6077	Spring	1
483	2011-10-31	Night	11	176	13	13.5385	5.3	8.23846	Spring	1
488	2011-11-01	Night	0	0	13	0	13.3	-13.3	Spring	0
493	2011-11-02	Night	18	288	13	22.1538	3.7	18.4538	Spring	1
498	2011-11-03	Night	5	80	13	6.15385	18.7	-12.5462	Spring	1
503	2011-11-04	Night	12	192	13	14.7692	7.7	7.06923	Spring	1
508	2011-11-05	Night	0	0	12	0	0.7	-0.7	Spring	0
513	2011-11-06	Night	5	80	12	6.66667	2.3	4.36667	Spring	1
518	2011-11-07	Night	30	480	12	40	10	30	Spring	1
523	2011-11-08	Night	13	208	12	17.3333	12	5.33333	Spring	1
528	2011-11-09	Night	3	48	12	4	1.3	2.7	Spring	1
533	2011-11-10	Night	0	0	12	0	6	-6	Spring	0
538	2011-11-11	Night	3	48	12	4	12.7	-8.7	Spring	1
543	2011-11-12	Night	7	112	12	9.33333	5.7	3.63333	Spring	1
548	2011-11-13	Night	64	1024	11	93.0909	13.3	79.7909	Spring	1
553	2011-11-14	Night	13	208	11	18.9091	25	-6.09091	Spring	1
558	2011-11-15	Night	2	32	11	2.90909	6.7	-3.79091	Spring	1
563	2011-11-16	Night	12	192	11	17.4545	2	15.4545	Spring	1
568	2011-11-17	Night	4	64	11	5.81818	5.7	0.118182	Spring	1
573	2011-11-18	Night	1	16	11	1.45455	4.7	-3.24545	Spring	1
578	2011-11-19	Night	4	64	10	6.4	6	0.4	Spring	1
583	2011-11-20	Night	0	0	10	0	0	0	Spring	0
588	2011-11-21	Night	0	0	10	0	0	0	Spring	0
593	2011-11-22	Night	0	0	10	0	0	0	Spring	0
598	2011-11-23	Night	0	0	10	0	0	0	Spring	0
603	2011-11-24	Night	0	0	10	0	0	0	Spring	0
608	2011-11-25	Night	0	0	10	0	0	0	Spring	0
613	2011-11-26	Night	0	0	10	0	0	0	Spring	0
618	2011-11-27	Night	0	0	9	0	0	0	Spring	0
623	2011-11-28	Night	4	64	9	7.11111	1.3	5.81111	Spring	1
628	2011-11-29	Night	3	48	9	5.33333	4	1.33333	Spring	1
633	2011-11-30	Night	24	384	9	42.6667	5	37.6667	Spring	1
638	2011-12-01	Night	0	0	8	0	6.7	-6.7	Summer	0
643	2011-12-02	Night	0	0	8	0	0	0	Summer	0
648	2011-12-03	Night	0	0	8	0	0	0	Summer	0
653	2011-12-04	Night	0	0	8	0	0	0	Summer	0
658	2011-12-05	Night	0	0	8	0	0	0	Summer	0
663	2011-12-06	Night	0	0	8	0	0	0	Summer	0
668	2011-12-07	Night	0	0	8	0	0	0	Summer	0
673	2011-12-08	Night	0	0	8	0	0	0	Summer	0
678	2011-12-09	Night	0	0	8	0	0	0	Summer	0
683	2011-12-10	Night	0	0	8	0	0	0	Summer	0
688	2011-12-11	Night	0	0	8	0	0	0	Summer	0
693	2011-12-12	Night	0	0	8	0	0	0	Summer	0
698	2011-12-13	Night	0	0	8	0	0	0	Summer	0
703	2011-12-14	Night	0	0	8	0	0	0	Summer	0
708	2011-12-15	Night	0	0	8	0	0	0	Summer	0
713	2011-12-16	Night	0	0	8	0	0	0	Summer	0
718	2011-12-17	Night	0	0	8	0	0	0	Summer	0
723	2011-12-18	Night	0	0	8	0	0	0	Summer	0
728	2011-12-19	Night	0	0	8	0	0	0	Summer	0
733	2011-12-20	Night	0	0	8	0	0	0	Summer	0
738	2011-12-21	Night	0	0	7	0	0	0	Summer	0
743	2011-12-22	Night	0	0	7	0	0	0	Summer	0
748	2011-12-23	Night	8	128	7	18.2857	1.7	16.5857	Summer	1
753	2011-12-24	Night	0	0	7	0	6.3	-6.3	Summer	0
758	2011-12-25	Night	0	0	7	0	0	0	Summer	0
763	2011-12-26	Night	0	0	7	0	0	0	Summer	0
768	2011-12-27	Night	0	0	7	0	0	0	Summer	0
773	2011-12-28	Night	0	0	7	0	0	0	Summer	0
778	2011-12-29	Night	0	0	7	0	0	0	Summer	0
783	2011-12-30	Night	0	0	8	0	0	0	Summer	0
788	2011-12-31	Night	0	0	7	0	0	0	Summer	0
793	2012-01-01	Night	0	0	7	0	0	0	Summer	0
798	2012-01-02	Night	0	0	8	0	0	0	Summer	0
803	2012-01-03	Night	0	0	8	0	0	0	Summer	0
808	2012-01-04	Night	0	0	7	0	0	0	Summer	0
813	2012-01-05	Night	0	0	9	0	0	0	Summer	0
818	2012-01-06	Night	0	0	8	0	0	0	Summer	0
823	2012-01-07	Night	0	0	9	0	0	0	Summer	0
828	2012-01-08	Night	0	0	9	0	0	0	Summer	0
833	2012-01-09	Night	0	0	9	0	0	0	Summer	0
838	2012-01-10	Night	0	0	9	0	0	0	Summer	0
843	2012-01-11	Night	0	0	9	0	0	0	Summer	0
848	2012-01-12	Night	0	0	9	0	0	0	Summer	0
853	2012-01-13	Night	0	0	9	0	0	0	Summer	0
858	2012-01-14	Night	0	0	9	0	0	0	Summer	0
863	2012-01-15	Night	0	0	9	0	0	0	Summer	0
868	2012-01-16	Night	0	0	9	0	0	0	Summer	0
873	2012-01-17	Night	0	0	9	0	0	0	Summer	0
878	2012-01-18	Night	0	0	9	0	0	0	Summer	0
883	2012-01-19	Night	0	0	10	0	0	0	Summer	0
888	2012-01-20	Night	0	0	10	0	0	0	Summer	0
893	2012-01-21	Night	0	0	10	0	0	0	Summer	0
898	2012-01-22	Night	0	0	10	0	0	0	Summer	0
903	2012-01-23	Night	0	0	10	0	0	0	Summer	0
908	2012-01-24	Night	0	0	11	0	0	0	Summer	0
913	2012-01-25	Night	0	0	11	0	0	0	Summer	0
918	2012-01-26	Night	0	0	11	0	0	0	Summer	0
923	2012-01-27	Night	0	0	11	0	0	0	Summer	0
928	2012-01-28	Night	0	0	11	0	0	0	Summer	0
933	2012-01-29	Night	0	0	11	0	0	0	Summer	0
938	2012-01-30	Night	0	0	11	0	0	0	Summer	0
943	2012-01-31	Night	0	0	12	0	0	0	Summer	0
948	2012-02-01	Night	0	0	12	0	0	0	Summer	0
953	2012-02-02	Night	0	0	12	0	0	0	Summer	0
958	2012-02-03	Night	0	0	12	0	0	0	Summer	0
963	2012-02-04	Night	0	0	12	0	0	0	Summer	0
968	2012-02-05	Night	0	0	12	0	0	0	Summer	0
973	2012-02-06	Night	0	0	12	0	0	0	Summer	0
978	2012-02-07	Night	0	0	12	0	0	0	Summer	0
983	2012-02-08	Night	0	0	12	0	0	0	Summer	0
988	2012-02-09	Night	0	0	13	0	0	0	Summer	0
993	2012-02-10	Night	0	0	13	0	0	0	Summer	0
998	2012-02-11	Night	0	0	13	0	0	0	Summer	0
1003	2012-02-12	Night	0	0	13	0	0	0	Summer	0
1008	2012-02-13	Night	0	0	14	0	0	0	Summer	0
1013	2012-02-14	Night	0	0	13	0	0	0	Summer	0
1018	2012-02-15	Night	0	0	14	0	0	0	Summer	0
1023	2012-02-16	Night	0	0	14	0	0	0	Summer	0
1028	2012-02-17	Night	0	0	14	0	0	0	Summer	0
1033	2012-02-18	Night	0	0	14	0	0	0	Summer	0
1038	2012-02-19	Night	0	0	15	0	0	0	Summer	0
1043	2012-02-20	Night	0	0	15	0	0	0	Summer	0
1048	2012-02-21	Night	0	0	15	0	0	0	Summer	0
1053	2012-02-22	Night	0	0	15	0	0	0	Summer	0
1058	2012-02-23	Night	0	0	15	0	0	0	Summer	0
1063	2012-02-24	Night	0	0	15	0	0	0	Summer	0
1068	2012-02-25	Night	0	0	15	0	0	0	Summer	0
1073	2012-02-26	Night	0	0	16	0	0.7	-0.7	Summer	0
1078	2012-02-27	Night	0	0	16	0	0	0	Summer	0
1083	2012-02-28	Night	0	0	16	0	0	0	Summer	0
1088	2012-02-29	Night	0	0	5	0	0	0	Summer	0
1093	2012-03-01	Night	0	0	11	0	0	0	Autumn	0
1098	2012-03-02	Night	0	0	16	0	0	0	Autumn	0
1103	2012-03-03	Night	0	0	17	0	0	0	Autumn	0
1108	2012-03-04	Night	0	0	17	0	0	0	Autumn	0
1113	2012-03-05	Night	0	0	17	0	0	0	Autumn	0
1118	2012-03-06	Night	0	0	17	0	0	0	Autumn	0
1123	2012-03-07	Night	0	0	17	0	0	0	Autumn	0
1128	2012-03-08	Night	0	0	17	0	0	0	Autumn	0
1133	2012-03-09	Night	0	0	17	0	0	0	Autumn	0
1138	2012-03-10	Night	0	0	17	0	0	0	Autumn	0
1143	2012-03-11	Night	0	0	17	0	0	0	Autumn	0
1148	2012-03-12	Night	0	0	18	0	0	0	Autumn	0
1153	2012-03-13	Night	0	0	18	0	0	0	Autumn	0
1158	2012-03-14	Night	0	0	18	0	0	0	Autumn	0
1163	2012-03-15	Night	0	0	19	0	0	0	Autumn	0
1168	2012-03-16	Night	0	0	19	0	0	0	Autumn	0
1173	2012-03-17	Night	0	0	19	0	0	0	Autumn	0
1178	2012-03-18	Night	0	0	19	0	0	0	Autumn	0
1183	2012-03-19	Night	0	0	19	0	0	0	Autumn	0
1188	2012-03-20	Night	0	0	19	0	8.7	-8.7	Autumn	0
1193	2012-03-21	Night	0	0	19	0	0	0	Autumn	0
1198	2012-03-22	Night	0	0	19	0	0	0	Autumn	0
1203	2012-03-23	Night	0	0	19	0	0	0	Autumn	0
1208	2012-03-24	Night	0	0	19	0	0	0	Autumn	0
1213	2012-03-25	Night	0	0	19	0	0	0	Autumn	0
1218	2012-03-26	Night	0	0	19	0	0	0	Autumn	0
1223	2012-03-27	Night	0	0	19	0	0	0	Autumn	0
1228	2012-03-28	Night	0	0	20	0	0	0	Autumn	0
1233	2012-03-29	Night	0	0	20	0	0	0	Autumn	0
1238	2012-03-30	Night	0	0	21	0	0	0	Autumn	0
1243	2012-03-31	Night	0	0	21	0	0	0	Autumn	0
1248	2012-04-01	Night	0	0	21	0	0	0	Autumn	0
1253	2012-04-02	Night	0	0	21	0	0	0	Autumn	0
1258	2012-04-03	Night	0	0	21	0	0	0	Autumn	0
1263	2012-04-04	Night	0	0	21	0	0	0	Autumn	0
1268	2012-04-05	Night	0	0	21	0	0	0	Autumn	0
1273	2012-04-06	Night	0	0	21	0	0	0	Autumn	0
1278	2012-04-07	Night	0	0	21	0	0	0	Autumn	0
1283	2012-04-08	Night	0	0	21	0	0	0	Autumn	0
1288	2012-04-09	Night	0	0	21	0	0	0	Autumn	0
1293	2012-04-10	Night	0	0	21	0	0	0	Autumn	0
1298	2012-04-11	Night	0	0	22	0	0	0	Autumn	0
1303	2012-04-12	Night	0	0	22	0	0	0	Autumn	0
1308	2012-04-13	Night	0	0	22	0	0	0	Autumn	0
1313	2012-04-14	Night	24	384	22	17.4545	0	17.4545	Autumn	1
1318	2012-04-15	Night	0	0	22	0	8	-8	Autumn	0
1323	2012-04-16	Night	0	0	22	0	0	0	Autumn	0
1328	2012-04-17	Night	0	0	22	0	0	0	Autumn	0
1333	2012-04-18	Night	0	0	23	0	0	0	Autumn	0
1338	2012-04-19	Night	0	0	23	0	0	0	Autumn	0
1343	2012-04-20	Night	0	0	23	0	0	0	Autumn	0
1348	2012-04-21	Night	0	0	23	0	0	0	Autumn	0
1353	2012-04-22	Night	0	0	23	0	0.3	-0.3	Autumn	0
1358	2012-04-23	Night	0	0	23	0	0	0	Autumn	0
1363	2012-04-24	Night	0	0	23	0	1.3	-1.3	Autumn	0
1368	2012-04-25	Night	0	0	22	0	0	0	Autumn	0
1373	2012-04-26	Night	0	0	22	0	0	0	Autumn	0
1378	2012-04-27	Night	0	0	24	0	0	0	Autumn	0
1383	2012-04-28	Night	0	0	23	0	0	0	Autumn	0
1388	2012-04-29	Night	0	0	24	0	0	0	Autumn	0
1393	2012-04-30	Night	0	0	24	0	0	0	Autumn	0
1398	2012-05-01	Night	0	0	24	0	0	0	Autumn	0
1403	2012-05-02	Night	0	0	24	0	0	0	Autumn	0
1408	2012-05-03	Night	0	0	24	0	0	0	Autumn	0
1413	2012-05-04	Night	25	400	24	16.6667	1.7	14.9667	Autumn	1
1418	2012-05-05	Night	17	272	24	11.3333	9.3	2.03333	Autumn	1
1423	2012-05-06	Night	5	80	24	3.33333	13	-9.66667	Autumn	1
1428	2012-05-07	Night	0	0	24	0	1.7	-1.7	Autumn	0
1433	2012-05-08	Night	0	0	24	0	0	0	Autumn	0
1438	2012-05-09	Night	41	656	24	27.3333	1.7	25.6333	Autumn	1
1443	2012-05-10	Night	0	0	24	0	23	-23	Autumn	0
1448	2012-05-11	Night	0	0	25	0	0	0	Autumn	0
1453	2012-05-12	Night	21	336	25	13.44	3.7	9.74	Autumn	1
1458	2012-05-13	Night	0	0	25	0	14.7	-14.7	Autumn	0
1463	2012-05-14	Night	69	1104	25	44.16	54.7	-10.54	Autumn	1
1468	2012-05-15	Night	61	976	25	39.04	26.7	12.34	Autumn	1
1473	2012-05-16	Night	25	400	17	23.5294	22	1.52941	Autumn	1
1478	2012-05-17	Night	59	944	25	37.76	47.3	-9.54	Autumn	1
1483	2012-05-18	Night	83	1328	26	51.0769	37.7	13.3769	Autumn	1
1488	2012-05-19	Night	127	2032	26	78.1538	53.3	24.8538	Autumn	1
1493	2012-05-20	Night	35	560	26	21.5385	72.3	-50.7615	Autumn	1
1498	2012-05-21	Night	318	5088	25	203.52	63.3	140.22	Autumn	1
1503	2012-05-22	Night	362	5792	26	222.769	174.3	48.4692	Autumn	1
1508	2012-05-23	Night	390	6240	26	240	267	-27	Autumn	1

## Sheet: Diel period upcalls
Line	Date	DielPeriod	NoOfUpCalls	TotalUpCallsInPeriod	NoOfRecordings	CallsPerHr	MeanUpCalls24hPeriod	Mean adjusted	Season	CallPresence
1	2011-07-22	Afternoon	69	1656	8	207	89.1	117.9	Winter	1
6	2011-07-23	Afternoon	43	1032	9	114.667	81.5	33.1667	Winter	1		Diel period	MeanCalls	SD	SE	MeanAdjCalls	SD	SE
11	2011-07-24	Afternoon	25	600	9	66.6667	112	-45.3333	Winter	1		Dawn	8.95127	22.9516	1.32291	-4.54806	21.3139	1.22851
16	2011-07-25	Afternoon	35	840	9	93.3333	118	-24.6667	Winter	1		Morning	9.87709	22.2875	1.28463	-3.62224	14.7891	0.852431
21	2011-07-26	Afternoon	31	744	9	82.6667	78.5	4.16667	Winter	1		Afternoon	11.4162	25.0877	1.44603	-2.21407	14.3516	0.82721
26	2011-07-27	Afternoon	12	288	9	32	82	-50	Winter	1		Dusk	18.33	44.738	2.57865	4.69978	30.0978	1.73481
31	2011-07-28	Afternoon	17	408	9	45.3333	44	1.33333	Winter	1		Night	17.2613	32.1117	1.84782	3.67624	17.3174	0.996506
36	2011-07-29	Afternoon	17	408	9	45.3333	51.5	-6.16667	Winter	1
41	2011-07-30	Afternoon	19	456	9	50.6667	69	-18.3333	Winter	1
46	2011-07-31	Afternoon	4	96	9	10.6667	41	-30.3333	Winter	1
51	2011-08-06	Afternoon	22	528	7	75.4286	71	4.42857	Winter	1
56	2011-08-07	Afternoon	17	272	10	27.2	111.3	-84.1	Winter	1
61	2011-08-08	Afternoon	26	416	10	41.6	37	4.6	Winter	1
66	2011-08-09	Afternoon	12	192	10	19.2	26	-6.8	Winter	1
71	2011-08-10	Afternoon	33	528	10	52.8	32	20.8	Winter	1
76	2011-08-11	Afternoon	42	672	10	67.2	59.3	7.9	Winter	1
81	2011-08-12	Afternoon	16	256	12	21.3333	49.7	-28.3667	Winter	1
86	2011-08-13	Afternoon	47	752	10	75.2	122	-46.8	Winter	1
91	2011-08-14	Afternoon	21	336	10	33.6	45.7	-12.1	Winter	1
96	2011-08-15	Afternoon	21	336	10	33.6	8	25.6	Winter	1
101	2011-08-16	Afternoon	30	480	10	48	45	3	Winter	1
106	2011-08-17	Afternoon	13	208	10	20.8	44	-23.2	Winter	1
111	2011-08-18	Afternoon	35	560	10	56	72.7	-16.7	Winter	1
116	2011-08-19	Afternoon	68	1088	10	108.8	118.7	-9.9	Winter	1
121	2011-08-20	Afternoon	48	768	10	76.8	51.3	25.5	Winter	1
126	2011-08-21	Afternoon	32	512	11	46.5455	75.3	-28.7545	Winter	1
131	2011-08-22	Afternoon	80	1280	10	128	87.3	40.7	Winter	1
136	2011-08-23	Afternoon	27	432	11	39.2727	70	-30.7273	Winter	1
141	2011-08-24	Afternoon	64	1024	11	93.0909	77.3	15.7909	Winter	1
146	2011-08-25	Afternoon	26	416	11	37.8182	37	0.818182	Winter	1
151	2011-08-26	Afternoon	68	1088	11	98.9091	80.7	18.2091	Winter	1
156	2011-08-27	Afternoon	38	608	11	55.2727	48	7.27273	Winter	1
161	2011-08-28	Afternoon	14	224	11	20.3636	28	-7.63636	Winter	1
166	2011-08-29	Afternoon	20	320	11	29.0909	41.3	-12.2091	Winter	1
171	2011-08-30	Afternoon	30	480	11	43.6364	37.7	5.93636	Winter	1
176	2011-08-31	Afternoon	10	160	11	14.5455	42	-27.4545	Winter	1
181	2011-09-01	Afternoon	9	144	11	13.0909	31	-17.9091	Spring	1
186	2011-09-02	Afternoon	0	0	11	0	34	-34	Spring	0
191	2011-09-03	Afternoon	6	96	11	8.72727	16	-7.27273	Spring	1
196	2011-09-04	Afternoon	12	192	11	17.4545	19	-1.54545	Spring	1
201	2011-09-05	Afternoon	11	176	11	16	22	-6	Spring	1
206	2011-09-06	Afternoon	30	480	11	43.6364	83	-39.3636	Spring	1
211	2011-09-07	Afternoon	49	784	11	71.2727	48	23.2727	Spring	1
216	2011-09-08	Afternoon	7	112	11	10.1818	19.7	-9.51818	Spring	1
221	2011-09-09	Afternoon	36	576	11	52.3636	38	14.3636	Spring	1
226	2011-09-10	Afternoon	23	368	12	30.6667	28.7	1.96667	Spring	1
231	2011-09-11	Afternoon	45	720	12	60	45	15	Spring	1
236	2011-09-12	Afternoon	31	496	12	41.3333	61	-19.6667	Spring	1
241	2011-09-13	Afternoon	15	240	12	20	27	-7	Spring	1
246	2011-09-14	Afternoon	47	752	12	62.6667	33.3	29.3667	Spring	1
251	2011-09-15	Afternoon	7	112	12	9.33333	23.3	-13.9667	Spring	1
256	2011-09-16	Afternoon	3	48	12	4	21.7	-17.7	Spring	1
261	2011-09-17	Afternoon	0	0	12	0	11	-11	Spring	0
266	2011-09-18	Afternoon	12	192	12	16	23.3	-7.3	Spring	1
271	2011-09-19	Afternoon	2	32	12	2.66667	35.7	-33.0333	Spring	1
276	2011-09-20	Afternoon	15	240	12	20	62	-42	Spring	1
281	2011-09-21	Afternoon	8	128	12	10.6667	40.7	-30.0333	Spring	1
286	2011-09-22	Afternoon	3	48	12	4	26.7	-22.7	Spring	1
291	2011-09-23	Afternoon	58	928	12	77.3333	49	28.3333	Spring	1
296	2011-09-24	Afternoon	7	112	12	9.33333	38	-28.6667	Spring	1
301	2011-09-25	Afternoon	16	256	12	21.3333	21.6	-0.266667	Spring	1
306	2011-09-26	Afternoon	0	0	12	0	3	-3	Spring	0
311	2011-09-27	Afternoon	6	96	12	8	2.6	5.4	Spring	1
316	2011-09-28	Afternoon	0	0	12	0	7.3	-7.3	Spring	0
321	2011-09-29	Afternoon	15	240	12	20	23	-3	Spring	1
326	2011-09-30	Afternoon	13	208	13	16	13	3	Spring	1
331	2011-10-01	Afternoon	0	0	13	0	0	0	Spring	0
336	2011-10-02	Afternoon	6	96	13	7.38462	7.3	0.0846154	Spring	1
341	2011-10-03	Afternoon	11	176	13	13.5385	21.7	-8.16154	Spring	1
346	2011-10-04	Afternoon	20	320	13	24.6154	26	-1.38462	Spring	1
351	2011-10-05	Afternoon	6	96	13	7.38462	8.3	-0.915385	Spring	1
356	2011-10-06	Afternoon	0	0	13	0	0.3	-0.3	Spring	0
361	2011-10-07	Afternoon	0	0	13	0	0.3	-0.3	Spring	0
366	2011-10-08	Afternoon	3	48	13	3.69231	1.3	2.39231	Spring	1
371	2011-10-09	Afternoon	22	352	13	27.0769	24.7	2.37692	Spring	1
376	2011-10-10	Afternoon	8	128	13	9.84615	6.3	3.54615	Spring	1
381	2011-10-11	Afternoon	1	16	13	1.23077	8	-6.76923	Spring	1
386	2011-10-12	Afternoon	3	48	13	3.69231	1	2.69231	Spring	1
391	2011-10-13	Afternoon	8	128	13	9.84615	3.7	6.14615	Spring	1
396	2011-10-14	Afternoon	0	0	13	0	3.7	-3.7	Spring	0
401	2011-10-15	Afternoon	4	64	12	5.33333	4.3	1.03333	Spring	1
406	2011-10-16	Afternoon	3	48	12	4	1.3	2.7	Spring	1
411	2011-10-17	Afternoon	0	0	12	0	0	0	Spring	0
416	2011-10-18	Afternoon	3	48	13	3.69231	1.3	2.39231	Spring	1
421	2011-10-19	Afternoon	0	0	13	0	2.7	-2.7	Spring	0
426	2011-10-20	Afternoon	6	96	14	6.85714	5	1.85714	Spring	1
431	2011-10-21	Afternoon	16	256	13	19.6923	5.7	13.9923	Spring	1
436	2011-10-22	Afternoon	22	352	14	25.1429	14.3	10.8429	Spring	1
441	2011-10-23	Afternoon	16	256	14	18.2857	24	-5.71429	Spring	1
446	2011-10-24	Afternoon	48	768	14	54.8571	36	18.8571	Spring	1
451	2011-10-25	Afternoon	40	640	14	45.7143	75.3	-29.5857	Spring	1
456	2011-10-26	Afternoon	0	0	14	0	23.7	-23.7	Spring	0
461	2011-10-27	Afternoon	2	32	14	2.28571	25.7	-23.4143	Spring	1
466	2011-10-28	Afternoon	0	0	14	0	10.7	-10.7	Spring	0
471	2011-10-29	Afternoon	0	0	14	0	4	-4	Spring	0
476	2011-10-30	Afternoon	1	16	14	1.14286	37	-35.8571	Spring	1
481	2011-10-31	Afternoon	0	0	14	0	0.3	-0.3	Spring	0
486	2011-11-01	Afternoon	3	48	14	3.42857	2.7	0.728571	Spring	1
491	2011-11-02	Afternoon	0	0	14	0	0.7	-0.7	Spring	0
496	2011-11-03	Afternoon	0	0	14	0	17	-17	Spring	0
501	2011-11-04	Afternoon	0	0	14	0	4.7	-4.7	Spring	0
506	2011-11-05	Afternoon	0	0	15	0	0	0	Spring	0
511	2011-11-06	Afternoon	0	0	14	0	0	0	Spring	0
516	2011-11-07	Afternoon	0	0	14	0	7.3	-7.3	Spring	0
521	2011-11-08	Afternoon	9	144	15	9.6	10.7	-1.1	Spring	1
526	2011-11-09	Afternoon	2	32	15	2.13333	1.3	0.833333	Spring	1
531	2011-11-10	Afternoon	14	224	15	14.9333	5.3	9.63333	Spring	1
536	2011-11-11	Afternoon	11	176	15	11.7333	11.3	0.433333	Spring	1
541	2011-11-12	Afternoon	0	0	15	0	3.7	-3.7	Spring	0
546	2011-11-13	Afternoon	0	0	15	0	8.3	-8.3	Spring	0
551	2011-11-14	Afternoon	0	0	15	0	18.7	-18.7	Spring	0
556	2011-11-15	Afternoon	0	0	15	0	3	-3	Spring	0
561	2011-11-16	Afternoon	0	0	15	0	2	-2	Spring	0
566	2011-11-17	Afternoon	0	0	15	0	5.7	-5.7	Spring	0
571	2011-11-18	Afternoon	3	48	15	3.2	4.7	-1.5	Spring	1
576	2011-11-19	Afternoon	7	112	15	7.46667	5.3	2.16667	Spring	1
581	2011-11-20	Afternoon	0	0	15	0	0	0	Spring	0
586	2011-11-21	Afternoon	0	0	15	0	0	0	Spring	0
591	2011-11-22	Afternoon	0	0	16	0	0	0	Spring	0
596	2011-11-23	Afternoon	0	0	16	0	0	0	Spring	0
601	2011-11-24	Afternoon	0	0	16	0	0	0	Spring	0
606	2011-11-25	Afternoon	0	0	16	0	0	0	Spring	0
611	2011-11-26	Afternoon	0	0	16	0	0	0	Spring	0
616	2011-11-27	Afternoon	0	0	16	0	0	0	Spring	0
621	2011-11-28	Afternoon	0	0	16	0	0	0	Spring	0
626	2011-11-29	Afternoon	5	80	16	5	1.7	3.3	Spring	1
631	2011-11-30	Afternoon	3	48	16	3	4.3	-1.3	Spring	1
636	2011-12-01	Afternoon	0	0	16	0	6.3	-6.3	Summer	0
641	2011-12-02	Afternoon	0	0	16	0	0	0	Summer	0
646	2011-12-03	Afternoon	0	0	16	0	0	0	Summer	0
651	2011-12-04	Afternoon	0	0	16	0	0	0	Summer	0
656	2011-12-05	Afternoon	0	0	16	0	0	0	Summer	0
661	2011-12-06	Afternoon	0	0	16	0	0	0	Summer	0
666	2011-12-07	Afternoon	0	0	16	0	0	0	Summer	0
671	2011-12-08	Afternoon	0	0	16	0	0	0	Summer	0
676	2011-12-09	Afternoon	0	0	16	0	0	0	Summer	0
681	2011-12-10	Afternoon	0	0	16	0	0	0	Summer	0
686	2011-12-11	Afternoon	0	0	16	0	0	0	Summer	0
691	2011-12-12	Afternoon	0	0	16	0	0	0	Summer	0
696	2011-12-13	Afternoon	0	0	16	0	0	0	Summer	0
701	2011-12-14	Afternoon	0	0	16	0	0	0	Summer	0
706	2011-12-15	Afternoon	0	0	16	0	0	0	Summer	0
711	2011-12-16	Afternoon	0	0	17	0	0	0	Summer	0
716	2011-12-17	Afternoon	0	0	17	0	0	0	Summer	0
721	2011-12-18	Afternoon	0	0	17	0	0	0	Summer	0
726	2011-12-19	Afternoon	0	0	17	0	0	0	Summer	0
731	2011-12-20	Afternoon	0	0	17	0	0	0	Summer	0
736	2011-12-21	Afternoon	0	0	17	0	0	0	Summer	0
741	2011-12-22	Afternoon	0	0	17	0	0	0	Summer	0
746	2011-12-23	Afternoon	0	0	17	0	0	0	Summer	0
751	2011-12-24	Afternoon	0	0	17	0	1.7	-1.7	Summer	0
756	2011-12-25	Afternoon	0	0	17	0	0	0	Summer	0
761	2011-12-26	Afternoon	0	0	17	0	0	0	Summer	0
766	2011-12-27	Afternoon	0	0	17	0	0	0	Summer	0
771	2011-12-28	Afternoon	0	0	17	0	0	0	Summer	0
776	2011-12-29	Afternoon	0	0	17	0	0	0	Summer	0
781	2011-12-30	Afternoon	0	0	17	0	0	0	Summer	0
786	2011-12-31	Afternoon	0	0	17	0	0	0	Summer	0
791	2012-01-01	Afternoon	0	0	17	0	0	0	Summer	0
796	2012-01-02	Afternoon	0	0	17	0	0	0	Summer	0
801	2012-01-03	Afternoon	0	0	17	0	0	0	Summer	0
806	2012-01-04	Afternoon	0	0	17	0	0	0	Summer	0
811	2012-01-05	Afternoon	0	0	17	0	0	0	Summer	0
816	2012-01-06	Afternoon	0	0	17	0	0	0	Summer	0
821	2012-01-07	Afternoon	0	0	17	0	0	0	Summer	0
826	2012-01-08	Afternoon	0	0	17	0	0	0	Summer	0
831	2012-01-09	Afternoon	0	0	17	0	0	0	Summer	0
836	2012-01-10	Afternoon	0	0	17	0	0	0	Summer	0
841	2012-01-11	Afternoon	0	0	17	0	0	0	Summer	0
846	2012-01-12	Afternoon	0	0	16	0	0	0	Summer	0
851	2012-01-13	Afternoon	0	0	17	0	0	0	Summer	0
856	2012-01-14	Afternoon	0	0	16	0	0	0	Summer	0
861	2012-01-15	Afternoon	0	0	16	0	0	0	Summer	0
866	2012-01-16	Afternoon	0	0	15	0	0	0	Summer	0
871	2012-01-17	Afternoon	0	0	15	0	0	0	Summer	0
876	2012-01-18	Afternoon	0	0	16	0	0	0	Summer	0
881	2012-01-19	Afternoon	0	0	15	0	0	0	Summer	0
886	2012-01-20	Afternoon	0	0	16	0	0	0	Summer	0
891	2012-01-21	Afternoon	0	0	15	0	0	0	Summer	0
896	2012-01-22	Afternoon	0	0	15	0	0	0	Summer	0
901	2012-01-23	Afternoon	0	0	15	0	0	0	Summer	0
906	2012-01-24	Afternoon	0	0	15	0	0	0	Summer	0
911	2012-01-25	Afternoon	0	0	15	0	0	0	Summer	0
916	2012-01-26	Afternoon	0	0	15	0	0	0	Summer	0
921	2012-01-27	Afternoon	0	0	15	0	0	0	Summer	0
926	2012-01-28	Afternoon	0	0	15	0	0	0	Summer	0
931	2012-01-29	Afternoon	0	0	16	0	0	0	Summer	0
936	2012-01-30	Afternoon	0	0	15	0	0	0	Summer	0
941	2012-01-31	Afternoon	0	0	17	0	0	0	Summer	0
946	2012-02-01	Afternoon	0	0	15	0	0	0	Summer	0
951	2012-02-02	Afternoon	0	0	15	0	0	0	Summer	0
956	2012-02-03	Afternoon	0	0	15	0	0	0	Summer	0
961	2012-02-04	Afternoon	0	0	15	0	0	0	Summer	0
966	2012-02-05	Afternoon	0	0	15	0	0	0	Summer	0
971	2012-02-06	Afternoon	0	0	15	0	0	0	Summer	0
976	2012-02-07	Afternoon	0	0	15	0	0	0	Summer	0
981	2012-02-08	Afternoon	0	0	15	0	0	0	Summer	0
986	2012-02-09	Afternoon	0	0	14	0	0	0	Summer	0
991	2012-02-10	Afternoon	0	0	14	0	0	0	Summer	0
996	2012-02-11	Afternoon	0	0	14	0	0	0	Summer	0
1001	2012-02-12	Afternoon	0	0	14	0	0	0	Summer	0
1006	2012-02-13	Afternoon	0	0	14	0	0	0	Summer	0
1011	2012-02-14	Afternoon	0	0	14	0	0	0	Summer	0
1016	2012-02-15	Afternoon	0	0	14	0	0	0	Summer	0
1021	2012-02-16	Afternoon	0	0	14	0	0	0	Summer	0
1026	2012-02-17	Afternoon	0	0	14	0	0	0	Summer	0
1031	2012-02-18	Afternoon	0	0	14	0	0	0	Summer	0
1036	2012-02-19	Afternoon	0	0	14	0	0	0	Summer	0
1041	2012-02-20	Afternoon	0	0	14	0	0	0	Summer	0
1046	2012-02-21	Afternoon	0	0	14	0	0	0	Summer	0
1051	2012-02-22	Afternoon	0	0	14	0	0	0	Summer	0
1056	2012-02-23	Afternoon	0	0	14	0	0	0	Summer	0
1061	2012-02-24	Afternoon	0	0	14	0	0	0	Summer	0
1066	2012-02-25	Afternoon	0	0	13	0	0	0	Summer	0
1071	2012-02-26	Afternoon	0	0	13	0	0	0	Summer	0
1076	2012-02-27	Afternoon	0	0	13	0	0	0	Summer	0
1081	2012-02-28	Afternoon	0	0	13	0	0	0	Summer	0
1086	2012-02-29	Afternoon	0	0	13	0	0	0	Summer	0
1096	2012-03-02	Afternoon	0	0	13	0	0	0	Autumn	0
1101	2012-03-03	Afternoon	0	0	13	0	0	0	Autumn	0
1106	2012-03-04	Afternoon	0	0	13	0	0	0	Autumn	0
1111	2012-03-05	Afternoon	0	0	13	0	0	0	Autumn	0
1116	2012-03-06	Afternoon	0	0	13	0	0	0	Autumn	0
1121	2012-03-07	Afternoon	0	0	13	0	0	0	Autumn	0
1126	2012-03-08	Afternoon	0	0	13	0	0	0	Autumn	0
1131	2012-03-09	Afternoon	0	0	12	0	0	0	Autumn	0
1136	2012-03-10	Afternoon	0	0	12	0	0	0	Autumn	0
1141	2012-03-11	Afternoon	0	0	12	0	0	0	Autumn	0
1146	2012-03-12	Afternoon	0	0	12	0	0	0	Autumn	0
1151	2012-03-13	Afternoon	0	0	12	0	0	0	Autumn	0
1156	2012-03-14	Afternoon	0	0	12	0	0	0	Autumn	0
1161	2012-03-15	Afternoon	0	0	12	0	0	0	Autumn	0
1166	2012-03-16	Afternoon	0	0	12	0	0	0	Autumn	0
1171	2012-03-17	Afternoon	0	0	12	0	0	0	Autumn	0
1176	2012-03-18	Afternoon	0	0	12	0	0	0	Autumn	0
1181	2012-03-19	Afternoon	0	0	12	0	0	0	Autumn	0
1186	2012-03-20	Afternoon	19	304	12	25.3333	6.3	19.0333	Autumn	1
1191	2012-03-21	Afternoon	0	0	12	0	0	0	Autumn	0
1196	2012-03-22	Afternoon	0	0	12	0	0	0	Autumn	0
1201	2012-03-23	Afternoon	0	0	11	0	0	0	Autumn	0
1206	2012-03-24	Afternoon	0	0	12	0	0	0	Autumn	0
1211	2012-03-25	Afternoon	0	0	12	0	0	0	Autumn	0
1216	2012-03-26	Afternoon	0	0	12	0	0	0	Autumn	0
1221	2012-03-27	Afternoon	0	0	12	0	0	0	Autumn	0
1226	2012-03-28	Afternoon	0	0	12	0	0	0	Autumn	0
1231	2012-03-29	Afternoon	0	0	12	0	0	0	Autumn	0
1236	2012-03-30	Afternoon	0	0	12	0	0	0	Autumn	0
1241	2012-03-31	Afternoon	0	0	12	0	0	0	Autumn	0
1246	2012-04-01	Afternoon	0	0	12	0	0	0	Autumn	0
1251	2012-04-02	Afternoon	0	0	11	0	0	0	Autumn	0
1256	2012-04-03	Afternoon	0	0	11	0	0	0	Autumn	0
1261	2012-04-04	Afternoon	0	0	12	0	0	0	Autumn	0
1266	2012-04-05	Afternoon	0	0	11	0	0	0	Autumn	0
1271	2012-04-06	Afternoon	0	0	11	0	0	0	Autumn	0
1276	2012-04-07	Afternoon	0	0	11	0	0	0	Autumn	0
1281	2012-04-08	Afternoon	0	0	11	0	0	0	Autumn	0
1286	2012-04-09	Afternoon	0	0	11	0	0	0	Autumn	0
1291	2012-04-10	Afternoon	0	0	11	0	0	0	Autumn	0
1296	2012-04-11	Afternoon	0	0	11	0	0	0	Autumn	0
1301	2012-04-12	Afternoon	0	0	11	0	0	0	Autumn	0
1306	2012-04-13	Afternoon	0	0	11	0	0	0	Autumn	0
1311	2012-04-14	Afternoon	0	0	11	0	0	0	Autumn	0
1316	2012-04-15	Afternoon	0	0	11	0	7	-7	Autumn	0
1321	2012-04-16	Afternoon	0	0	11	0	0	0	Autumn	0
1326	2012-04-17	Afternoon	0	0	11	0	0	0	Autumn	0
1331	2012-04-18	Afternoon	0	0	11	0	0	0	Autumn	0
1336	2012-04-19	Afternoon	0	0	11	0	0	0	Autumn	0
1341	2012-04-20	Afternoon	0	0	10	0	0	0	Autumn	0
1346	2012-04-21	Afternoon	0	0	10	0	0	0	Autumn	0
1351	2012-04-22	Afternoon	0	0	10	0	0.3	-0.3	Autumn	0
1356	2012-04-23	Afternoon	0	0	10	0	0	0	Autumn	0
1361	2012-04-24	Afternoon	3	48	10	4.8	1	3.8	Autumn	1
1366	2012-04-25	Afternoon	0	0	10	0	0	0	Autumn	0
1371	2012-04-26	Afternoon	0	0	10	0	0	0	Autumn	0
1376	2012-04-27	Afternoon	0	0	10	0	0	0	Autumn	0
1381	2012-04-28	Afternoon	0	0	10	0	0	0	Autumn	0
1386	2012-04-29	Afternoon	0	0	10	0	0	0	Autumn	0
1391	2012-04-30	Afternoon	0	0	10	0	0	0	Autumn	0
1396	2012-05-01	Afternoon	0	0	10	0	0	0	Autumn	0
1401	2012-05-02	Afternoon	0	0	10	0	0	0	Autumn	0
1406	2012-05-03	Afternoon	0	0	10	0	0	0	Autumn	0
1411	2012-05-04	Afternoon	0	0	10	0	1.3	-1.3	Autumn	0
1416	2012-05-05	Afternoon	1	16	10	1.6	7	-5.4	Autumn	1
1421	2012-05-06	Afternoon	0	0	9	0	8.7	-8.7	Autumn	0
1426	2012-05-07	Afternoon	0	0	9	0	1.3	-1.3	Autumn	0
1431	2012-05-08	Afternoon	0	0	9	0	0	0	Autumn	0
1436	2012-05-09	Afternoon	1	16	9	1.77778	0.3	1.47778	Autumn	1
1441	2012-05-10	Afternoon	6	96	9	10.6667	10.7	-0.0333333	Autumn	1
1446	2012-05-11	Afternoon	0	0	9	0	0	0	Autumn	0
1451	2012-05-12	Afternoon	1	16	9	1.77778	2.3	-0.522222	Autumn	1
1456	2012-05-13	Afternoon	0	0	9	0	7	-7	Autumn	0
1461	2012-05-14	Afternoon	7	112	9	12.4444	12.7	-0.255556	Autumn	1
1466	2012-05-15	Afternoon	7	112	9	12.4444	25.3	-12.8556	Autumn	1
1471	2012-05-16	Afternoon	8	128	9	14.2222	15.7	-1.47778	Autumn	1
1476	2012-05-17	Afternoon	31	496	9	55.1111	25.7	29.4111	Autumn	1
1481	2012-05-18	Afternoon	1	16	9	1.77778	19	-17.2222	Autumn	1
1486	2012-05-19	Afternoon	7	112	9	12.4444	14.7	-2.25556	Autumn	1
1491	2012-05-20	Afternoon	4	64	9	7.11111	26.3	-19.1889	Autumn	1
1496	2012-05-21	Afternoon	26	416	9	46.2222	30.3	15.9222	Autumn	1
1501	2012-05-22	Afternoon	17	272	9	30.2222	60.7	-30.4778	Autumn	1
1506	2012-05-23	Afternoon	36	576	9	64	116.3	-52.3	Autumn	1
4	2011-07-23	Dawn	1	24	3	8	81.5	-73.5	Winter	1
9	2011-07-24	Dawn	4	96	3	32	112	-80	Winter	1
14	2011-07-25	Dawn	6	144	3	48	118	-70	Winter	1
19	2011-07-26	Dawn	6	144	3	48	78.5	-30.5	Winter	1
24	2011-07-27	Dawn	10	240	3	80	82	-2	Winter	1
29	2011-07-28	Dawn	3	72	3	24	44	-20	Winter	1
34	2011-07-29	Dawn	0	0	3	0	51.5	-51.5	Winter	0
39	2011-07-30	Dawn	16	384	3	128	69	59	Winter	1
44	2011-07-31	Dawn	2	48	3	16	41	-25	Winter	1
49	2011-08-01	Dawn	4	96	3	32	71	-39	Winter	1
54	2011-08-07	Dawn	14	224	2	112	111.3	0.7	Winter	1
59	2011-08-08	Dawn	2	32	2	16	37	-21	Winter	1
64	2011-08-09	Dawn	1	16	2	8	26	-18	Winter	1
69	2011-08-10	Dawn	5	80	3	26.6667	32	-5.33333	Winter	1
74	2011-08-11	Dawn	25	400	3	133.333	59.3	74.0333	Winter	1
79	2011-08-12	Dawn	10	160	3	25	49.7	-24.7	Winter	1
84	2011-08-13	Dawn	14	224	3	74.6667	122	-47.3333	Winter	1
89	2011-08-14	Dawn	3	48	3	16	45.7	-29.7	Winter	1
94	2011-08-15	Dawn	3	48	3	16	8	8	Winter	1
99	2011-08-16	Dawn	11	176	3	58.6667	45	13.6667	Winter	1
104	2011-08-17	Dawn	1	16	3	5.33333	44	-38.6667	Winter	1
109	2011-08-18	Dawn	0	0	2	0	72.7	-72.7	Winter	0
114	2011-08-19	Dawn	5	80	2	40	118.7	-78.7	Winter	1
119	2011-08-20	Dawn	0	0	2	0	51.3	-51.3	Winter	0
124	2011-08-21	Dawn	7	112	2	56	75.3	-19.3	Winter	1
129	2011-08-22	Dawn	0	0	2	0	87.3	-87.3	Winter	0
134	2011-08-23	Dawn	5	80	3	26.6667	70	-43.3333	Winter	1
139	2011-08-24	Dawn	2	32	2	16	77.3	-61.3	Winter	1
144	2011-08-25	Dawn	1	16	2	8	37	-29	Winter	1
149	2011-08-26	Dawn	7	112	2	56	80.7	-24.7	Winter	1
154	2011-08-27	Dawn	8	128	2	64	48	16	Winter	1
159	2011-08-28	Dawn	1	16	2	8	28	-20	Winter	1
164	2011-08-29	Dawn	0	0	2	0	41.3	-41.3	Winter	0
169	2011-08-30	Dawn	3	48	3	16	37.7	-21.7	Winter	1
174	2011-08-31	Dawn	2	32	3	10.6667	42	-31.3333	Winter	1
179	2011-09-01	Dawn	6	96	2	48	31	17	Spring	1
184	2011-09-02	Dawn	0	0	2	0	34	-34	Spring	0
189	2011-09-03	Dawn	2	32	2	16	16	0	Spring	1
194	2011-09-04	Dawn	0	0	2	0	19	-19	Spring	0
199	2011-09-05	Dawn	2	32	2	16	22	-6	Spring	1
204	2011-09-06	Dawn	0	0	2	0	83	-83	Spring	0
209	2011-09-07	Dawn	8	128	2	64	48	16	Spring	1
214	2011-09-08	Dawn	3	48	2	24	19.7	4.3	Spring	1
219	2011-09-09	Dawn	2	32	2	16	38	-22	Spring	1
224	2011-09-10	Dawn	4	64	3	21.3333	28.7	-7.36667	Spring	1
229	2011-09-11	Dawn	2	32	3	10.6667	45	-34.3333	Spring	1
234	2011-09-12	Dawn	8	128	3	42.6667	61	-18.3333	Spring	1
239	2011-09-13	Dawn	13	208	3	69.3333	27	42.3333	Spring	1
244	2011-09-14	Dawn	0	0	3	0	33.3	-33.3	Spring	0
249	2011-09-15	Dawn	1	16	3	5.33333	23.3	-17.9667	Spring	1
254	2011-09-16	Dawn	4	64	2	32	21.7	10.3	Spring	1
259	2011-09-17	Dawn	1	16	2	8	11	-3	Spring	1
264	2011-09-18	Dawn	8	128	2	64	23.3	40.7	Spring	1
269	2011-09-19	Dawn	1	16	2	8	35.7	-27.7	Spring	1
274	2011-09-20	Dawn	3	48	2	24	62	-38	Spring	1
279	2011-09-21	Dawn	0	0	2	0	40.7	-40.7	Spring	0
284	2011-09-22	Dawn	6	96	2	48	26.7	21.3	Spring	1
289	2011-09-23	Dawn	0	0	2	0	49	-49	Spring	0
294	2011-09-24	Dawn	2	32	3	10.6667	38	-27.3333	Spring	1
299	2011-09-25	Dawn	0	0	3	0	21.6	-21.6	Spring	0
304	2011-09-26	Dawn	0	0	1	0	3	-3	Spring	0
309	2011-09-27	Dawn	0	0	3	0	2.6	-2.6	Spring	0
314	2011-09-28	Dawn	0	0	3	0	7.3	-7.3	Spring	0
319	2011-09-29	Dawn	8	128	2	64	23	41	Spring	1
324	2011-09-30	Dawn	0	0	2	0	13	-13	Spring	0
329	2011-10-01	Dawn	0	0	2	0	0	0	Spring	0
334	2011-10-02	Dawn	0	0	2	0	7.3	-7.3	Spring	0
339	2011-10-03	Dawn	0	0	2	0	21.7	-21.7	Spring	0
344	2011-10-04	Dawn	5	80	2	40	26	14	Spring	1
349	2011-10-05	Dawn	0	0	2	0	8.3	-8.3	Spring	0
354	2011-10-06	Dawn	1	16	3	5.33333	0.3	5.03333	Spring	1
359	2011-10-07	Dawn	0	0	2	0	0.3	-0.3	Spring	0
364	2011-10-08	Dawn	0	0	3	0	1.3	-1.3	Spring	0
369	2011-10-09	Dawn	5	80	3	26.6667	24.7	1.96667	Spring	1
374	2011-10-10	Dawn	0	0	3	0	6.3	-6.3	Spring	0
379	2011-10-11	Dawn	0	0	3	0	8	-8	Spring	0
384	2011-10-12	Dawn	0	0	3	0	1	-1	Spring	0
389	2011-10-13	Dawn	1	16	2	8	3.7	4.3	Spring	1
394	2011-10-14	Dawn	1	16	2	8	3.7	4.3	Spring	1
399	2011-10-15	Dawn	0	0	2	0	4.3	-4.3	Spring	0
404	2011-10-16	Dawn	0	0	2	0	1.3	-1.3	Spring	0
409	2011-10-17	Dawn	0	0	2	0	0	0	Spring	0
414	2011-10-18	Dawn	0	0	3	0	1.3	-1.3	Spring	0
419	2011-10-19	Dawn	0	0	3	0	2.7	-2.7	Spring	0
424	2011-10-20	Dawn	0	0	3	0	5	-5	Spring	0
429	2011-10-21	Dawn	0	0	2	0	5.7	-5.7	Spring	0
434	2011-10-22	Dawn	0	0	3	0	14.3	-14.3	Spring	0
439	2011-10-23	Dawn	0	0	3	0	24	-24	Spring	0
444	2011-10-24	Dawn	3	48	3	16	36	-20	Spring	1
449	2011-10-25	Dawn	6	96	3	32	75.3	-43.3	Spring	1
454	2011-10-26	Dawn	10	160	3	53.3333	23.7	29.6333	Spring	1
459	2011-10-27	Dawn	5	80	2	40	25.7	14.3	Spring	1
464	2011-10-28	Dawn	9	144	2	72	10.7	61.3	Spring	1
469	2011-10-29	Dawn	0	0	2	0	4	-4	Spring	0
474	2011-10-30	Dawn	16	256	2	128	37	91	Spring	1
479	2011-10-31	Dawn	0	0	3	0	0.3	-0.3	Spring	0
484	2011-11-01	Dawn	0	0	3	0	2.7	-2.7	Spring	0
489	2011-11-02	Dawn	0	0	3	0	0.7	-0.7	Spring	0
494	2011-11-03	Dawn	26	416	3	138.667	17	121.667	Spring	1
499	2011-11-04	Dawn	0	0	3	0	4.7	-4.7	Spring	0
504	2011-11-05	Dawn	0	0	3	0	0	0	Spring	0
509	2011-11-06	Dawn	0	0	3	0	0	0	Spring	0
514	2011-11-07	Dawn	0	0	3	0	7.3	-7.3	Spring	0
519	2011-11-08	Dawn	0	0	3	0	10.7	-10.7	Spring	0
524	2011-11-09	Dawn	0	0	3	0	1.3	-1.3	Spring	0
529	2011-11-10	Dawn	0	0	3	0	5.3	-5.3	Spring	0
534	2011-11-11	Dawn	0	0	3	0	11.3	-11.3	Spring	0
539	2011-11-12	Dawn	0	0	3	0	3.7	-3.7	Spring	0
544	2011-11-13	Dawn	0	0	3	0	8.3	-8.3	Spring	0
549	2011-11-14	Dawn	0	0	3	0	18.7	-18.7	Spring	0
554	2011-11-15	Dawn	0	0	3	0	3	-3	Spring	0
559	2011-11-16	Dawn	0	0	3	0	2	-2	Spring	0
564	2011-11-17	Dawn	0	0	3	0	5.7	-5.7	Spring	0
569	2011-11-18	Dawn	5	80	3	26.6667	4.7	21.9667	Spring	1
574	2011-11-19	Dawn	0	0	3	0	5.3	-5.3	Spring	0
579	2011-11-20	Dawn	0	0	3	0	0	0	Spring	0
584	2011-11-21	Dawn	0	0	3	0	0	0	Spring	0
589	2011-11-22	Dawn	0	0	3	0	0	0	Spring	0
594	2011-11-23	Dawn	0	0	3	0	0	0	Spring	0
599	2011-11-24	Dawn	0	0	3	0	0	0	Spring	0
604	2011-11-25	Dawn	0	0	3	0	0	0	Spring	0
609	2011-11-26	Dawn	0	0	3	0	0	0	Spring	0
614	2011-11-27	Dawn	0	0	3	0	0	0	Spring	0
619	2011-11-28	Dawn	0	0	3	0	0	0	Spring	0
624	2011-11-29	Dawn	0	0	4	0	1.7	-1.7	Spring	0
629	2011-11-30	Dawn	0	0	3	0	4.3	-4.3	Spring	0
634	2011-12-01	Dawn	0	0	4	0	6.3	-6.3	Summer	0
639	2011-12-02	Dawn	0	0	4	0	0	0	Summer	0
644	2011-12-03	Dawn	0	0	4	0	0	0	Summer	0
649	2011-12-04	Dawn	0	0	4	0	0	0	Summer	0
654	2011-12-05	Dawn	0	0	4	0	0	0	Summer	0
659	2011-12-06	Dawn	0	0	4	0	0	0	Summer	0
664	2011-12-07	Dawn	0	0	4	0	0	0	Summer	0
669	2011-12-08	Dawn	0	0	4	0	0	0	Summer	0
674	2011-12-09	Dawn	0	0	4	0	0	0	Summer	0
679	2011-12-10	Dawn	0	0	4	0	0	0	Summer	0
684	2011-12-11	Dawn	0	0	4	0	0	0	Summer	0
689	2011-12-12	Dawn	0	0	4	0	0	0	Summer	0
694	2011-12-13	Dawn	0	0	4	0	0	0	Summer	0
699	2011-12-14	Dawn	0	0	4	0	0	0	Summer	0
704	2011-12-15	Dawn	0	0	4	0	0	0	Summer	0
709	2011-12-16	Dawn	0	0	4	0	0	0	Summer	0
714	2011-12-17	Dawn	0	0	4	0	0	0	Summer	0
719	2011-12-18	Dawn	0	0	4	0	0	0	Summer	0
724	2011-12-19	Dawn	0	0	4	0	0	0	Summer	0
729	2011-12-20	Dawn	0	0	4	0	0	0	Summer	0
734	2011-12-21	Dawn	0	0	4	0	0	0	Summer	0
739	2011-12-22	Dawn	0	0	4	0	0	0	Summer	0
744	2011-12-23	Dawn	0	0	4	0	0	0	Summer	0
749	2011-12-24	Dawn	0	0	4	0	1.7	-1.7	Summer	0
754	2011-12-25	Dawn	0	0	4	0	0	0	Summer	0
759	2011-12-26	Dawn	0	0	4	0	0	0	Summer	0
764	2011-12-27	Dawn	0	0	4	0	0	0	Summer	0
769	2011-12-28	Dawn	0	0	4	0	0	0	Summer	0
774	2011-12-29	Dawn	0	0	4	0	0	0	Summer	0
779	2011-12-30	Dawn	0	0	4	0	0	0	Summer	0
784	2011-12-31	Dawn	0	0	4	0	0	0	Summer	0
789	2012-01-01	Dawn	0	0	4	0	0	0	Summer	0
794	2012-01-02	Dawn	0	0	4	0	0	0	Summer	0
799	2012-01-03	Dawn	0	0	4	0	0	0	Summer	0
804	2012-01-04	Dawn	0	0	4	0	0	0	Summer	0
809	2012-01-05	Dawn	0	0	4	0	0	0	Summer	0
814	2012-01-06	Dawn	0	0	3	0	0	0	Summer	0
819	2012-01-07	Dawn	0	0	4	0	0	0	Summer	0
824	2012-01-08	Dawn	0	0	3	0	0	0	Summer	0
829	2012-01-09	Dawn	0	0	3	0	0	0	Summer	0
834	2012-01-10	Dawn	0	0	3	0	0	0	Summer	0
839	2012-01-11	Dawn	0	0	3	0	0	0	Summer	0
844	2012-01-12	Dawn	0	0	3	0	0	0	Summer	0
849	2012-01-13	Dawn	0	0	3	0	0	0	Summer	0
854	2012-01-14	Dawn	0	0	4	0	0	0	Summer	0
859	2012-01-15	Dawn	0	0	4	0	0	0	Summer	0
864	2012-01-16	Dawn	0	0	4	0	0	0	Summer	0
869	2012-01-17	Dawn	0	0	4	0	0	0	Summer	0
874	2012-01-18	Dawn	0	0	4	0	0	0	Summer	0
879	2012-01-19	Dawn	0	0	4	0	0	0	Summer	0
884	2012-01-20	Dawn	0	0	3	0	0	0	Summer	0
889	2012-01-21	Dawn	0	0	3	0	0	0	Summer	0
894	2012-01-22	Dawn	0	0	3	0	0	0	Summer	0
899	2012-01-23	Dawn	0	0	3	0	0	0	Summer	0
904	2012-01-24	Dawn	0	0	3	0	0	0	Summer	0
909	2012-01-25	Dawn	0	0	3	0	0	0	Summer	0
914	2012-01-26	Dawn	0	0	3	0	0	0	Summer	0
919	2012-01-27	Dawn	0	0	3	0	0	0	Summer	0
924	2012-01-28	Dawn	0	0	3	0	0	0	Summer	0
929	2012-01-29	Dawn	0	0	3	0	0	0	Summer	0
934	2012-01-30	Dawn	0	0	3	0	0	0	Summer	0
939	2012-01-31	Dawn	0	0	4	0	0	0	Summer	0
944	2012-02-01	Dawn	0	0	3	0	0	0	Summer	0
949	2012-02-02	Dawn	0	0	3	0	0	0	Summer	0
954	2012-02-03	Dawn	0	0	3	0	0	0	Summer	0
959	2012-02-04	Dawn	0	0	3	0	0	0	Summer	0
964	2012-02-05	Dawn	0	0	3	0	0	0	Summer	0
969	2012-02-06	Dawn	0	0	3	0	0	0	Summer	0
974	2012-02-07	Dawn	0	0	3	0	0	0	Summer	0
979	2012-02-08	Dawn	0	0	3	0	0	0	Summer	0
984	2012-02-09	Dawn	0	0	3	0	0	0	Summer	0
989	2012-02-10	Dawn	0	0	3	0	0	0	Summer	0
994	2012-02-11	Dawn	0	0	3	0	0	0	Summer	0
999	2012-02-12	Dawn	0	0	3	0	0	0	Summer	0
1004	2012-02-13	Dawn	0	0	3	0	0	0	Summer	0
1009	2012-02-14	Dawn	0	0	2	0	0	0	Summer	0
1014	2012-02-15	Dawn	0	0	3	0	0	0	Summer	0
1019	2012-02-16	Dawn	0	0	2	0	0	0	Summer	0
1024	2012-02-17	Dawn	0	0	3	0	0	0	Summer	0
1029	2012-02-18	Dawn	0	0	3	0	0	0	Summer	0
1034	2012-02-19	Dawn	0	0	3	0	0	0	Summer	0
1039	2012-02-20	Dawn	0	0	3	0	0	0	Summer	0
1044	2012-02-21	Dawn	0	0	3	0	0	0	Summer	0
1049	2012-02-22	Dawn	0	0	3	0	0	0	Summer	0
1054	2012-02-23	Dawn	0	0	3	0	0	0	Summer	0
1059	2012-02-24	Dawn	0	0	3	0	0	0	Summer	0
1064	2012-02-25	Dawn	0	0	3	0	0	0	Summer	0
1069	2012-02-26	Dawn	0	0	3	0	0	0	Summer	0
1074	2012-02-27	Dawn	0	0	2	0	0	0	Summer	0
1079	2012-02-28	Dawn	0	0	2	0	0	0	Summer	0
1084	2012-02-29	Dawn	0	0	2	0	0	0	Summer	0
1094	2012-03-02	Dawn	0	0	2	0	0	0	Autumn	0
1099	2012-03-03	Dawn	0	0	2	0	0	0	Autumn	0
1104	2012-03-04	Dawn	0	0	2	0	0	0	Autumn	0
1109	2012-03-05	Dawn	0	0	3	0	0	0	Autumn	0
1114	2012-03-06	Dawn	0	0	3	0	0	0	Autumn	0
1119	2012-03-07	Dawn	0	0	3	0	0	0	Autumn	0
1124	2012-03-08	Dawn	0	0	3	0	0	0	Autumn	0
1129	2012-03-09	Dawn	0	0	3	0	0	0	Autumn	0
1134	2012-03-10	Dawn	0	0	3	0	0	0	Autumn	0
1139	2012-03-11	Dawn	0	0	3	0	0	0	Autumn	0
1144	2012-03-12	Dawn	0	0	3	0	0	0	Autumn	0
1149	2012-03-13	Dawn	0	0	2	0	0	0	Autumn	0
1154	2012-03-14	Dawn	0	0	2	0	0	0	Autumn	0
1159	2012-03-15	Dawn	0	0	2	0	0	0	Autumn	0
1164	2012-03-16	Dawn	0	0	2	0	0	0	Autumn	0
1169	2012-03-17	Dawn	0	0	2	0	0	0	Autumn	0
1174	2012-03-18	Dawn	0	0	2	0	0	0	Autumn	0
1179	2012-03-19	Dawn	0	0	2	0	0	0	Autumn	0
1184	2012-03-20	Dawn	0	0	2	0	6.3	-6.3	Autumn	0
1189	2012-03-21	Dawn	0	0	2	0	0	0	Autumn	0
1194	2012-03-22	Dawn	0	0	2	0	0	0	Autumn	0
1199	2012-03-23	Dawn	0	0	3	0	0	0	Autumn	0
1204	2012-03-24	Dawn	0	0	3	0	0	0	Autumn	0
1209	2012-03-25	Dawn	0	0	3	0	0	0	Autumn	0
1214	2012-03-26	Dawn	0	0	3	0	0	0	Autumn	0
1219	2012-03-27	Dawn	0	0	3	0	0	0	Autumn	0
1224	2012-03-28	Dawn	0	0	3	0	0	0	Autumn	0
1229	2012-03-29	Dawn	0	0	3	0	0	0	Autumn	0
1234	2012-03-30	Dawn	0	0	3	0	0	0	Autumn	0
1239	2012-03-31	Dawn	0	0	2	0	0	0	Autumn	0
1244	2012-04-01	Dawn	0	0	2	0	0	0	Autumn	0
1249	2012-04-02	Dawn	0	0	2	0	0	0	Autumn	0
1254	2012-04-03	Dawn	0	0	2	0	0	0	Autumn	0
1259	2012-04-04	Dawn	0	0	2	0	0	0	Autumn	0
1264	2012-04-05	Dawn	0	0	2	0	0	0	Autumn	0
1269	2012-04-06	Dawn	0	0	2	0	0	0	Autumn	0
1274	2012-04-07	Dawn	0	0	2	0	0	0	Autumn	0
1279	2012-04-08	Dawn	0	0	2	0	0	0	Autumn	0
1284	2012-04-09	Dawn	0	0	3	0	0	0	Autumn	0
1289	2012-04-10	Dawn	0	0	2	0	0	0	Autumn	0
1294	2012-04-11	Dawn	0	0	3	0	0	0	Autumn	0
1299	2012-04-12	Dawn	0	0	3	0	0	0	Autumn	0
1304	2012-04-13	Dawn	0	0	3	0	0	0	Autumn	0
1309	2012-04-14	Dawn	0	0	3	0	0	0	Autumn	0
1314	2012-04-15	Dawn	0	0	3	0	7	-7	Autumn	0
1319	2012-04-16	Dawn	0	0	3	0	0	0	Autumn	0
1324	2012-04-17	Dawn	0	0	3	0	0	0	Autumn	0
1329	2012-04-18	Dawn	0	0	3	0	0	0	Autumn	0
1334	2012-04-19	Dawn	0	0	2	0	0	0	Autumn	0
1339	2012-04-20	Dawn	0	0	2	0	0	0	Autumn	0
1344	2012-04-21	Dawn	0	0	2	0	0	0	Autumn	0
1349	2012-04-22	Dawn	0	0	2	0	0.3	-0.3	Autumn	0
1354	2012-04-23	Dawn	0	0	2	0	0	0	Autumn	0
1359	2012-04-24	Dawn	0	0	2	0	1	-1	Autumn	0
1364	2012-04-25	Dawn	0	0	2	0	0	0	Autumn	0
1369	2012-04-26	Dawn	0	0	3	0	0	0	Autumn	0
1374	2012-04-27	Dawn	0	0	3	0	0	0	Autumn	0
1379	2012-04-28	Dawn	0	0	3	0	0	0	Autumn	0
1384	2012-04-29	Dawn	0	0	2	0	0	0	Autumn	0
1389	2012-04-30	Dawn	0	0	3	0	0	0	Autumn	0
1394	2012-05-01	Dawn	0	0	3	0	0	0	Autumn	0
1399	2012-05-02	Dawn	0	0	3	0	0	0	Autumn	0
1404	2012-05-03	Dawn	0	0	3	0	0	0	Autumn	0
1409	2012-05-04	Dawn	0	0	3	0	1.3	-1.3	Autumn	0
1414	2012-05-05	Dawn	0	0	3	0	7	-7	Autumn	0
1419	2012-05-06	Dawn	0	0	3	0	8.7	-8.7	Autumn	0
1424	2012-05-07	Dawn	0	0	3	0	1.3	-1.3	Autumn	0
1429	2012-05-08	Dawn	0	0	3	0	0	0	Autumn	0
1434	2012-05-09	Dawn	0	0	3	0	0.3	-0.3	Autumn	0
1439	2012-05-10	Dawn	0	0	3	0	10.7	-10.7	Autumn	0
1444	2012-05-11	Dawn	0	0	3	0	0	0	Autumn	0
1449	2012-05-12	Dawn	0	0	2	0	2.3	-2.3	Autumn	0
1454	2012-05-13	Dawn	0	0	2	0	7	-7	Autumn	0
1459	2012-05-14	Dawn	0	0	2	0	12.7	-12.7	Autumn	0
1464	2012-05-15	Dawn	0	0	2	0	25.3	-25.3	Autumn	0
1469	2012-05-16	Dawn	2	32	2	16	15.7	0.3	Autumn	1
1474	2012-05-17	Dawn	5	80	2	40	25.7	14.3	Autumn	1
1479	2012-05-18	Dawn	1	16	2	8	19	-11	Autumn	1
1484	2012-05-19	Dawn	0	0	2	0	14.7	-14.7	Autumn	0
1489	2012-05-20	Dawn	8	128	2	64	26.3	37.7	Autumn	1
1494	2012-05-21	Dawn	1	16	3	5.33333	30.3	-24.9667	Autumn	1
1499	2012-05-22	Dawn	20	320	3	106.667	60.7	45.9667	Autumn	1
1504	2012-05-23	Dawn	9	144	3	48	116.3	-68.3	Autumn	1
1509	2012-05-24	Dawn	2	32	3	10.6667	49.7	-39.0333	Autumn	1
2	2011-07-22	Dusk	1	24	3	8	89.1	-81.1	Winter	1
7	2011-07-23	Dusk	15	360	3	120	81.5	38.5	Winter	1
12	2011-07-24	Dusk	13	312	3	104	112	-8	Winter	1
17	2011-07-25	Dusk	23	552	3	184	118	66	Winter	1
22	2011-07-26	Dusk	18	432	3	144	78.5	65.5	Winter	1
27	2011-07-27	Dusk	28	672	3	224	82	142	Winter	1
32	2011-07-28	Dusk	9	216	3	72	44	28	Winter	1
37	2011-07-29	Dusk	9	216	3	72	51.5	20.5	Winter	1
42	2011-07-30	Dusk	4	96	3	32	69	-37	Winter	1
47	2011-07-31	Dusk	9	216	3	72	41	31	Winter	1
52	2011-08-06	Dusk	27	432	2	216	71	145	Winter	1
57	2011-08-07	Dusk	22	352	2	176	111.3	64.7	Winter	1
62	2011-08-08	Dusk	3	48	2	24	37	-13	Winter	1
67	2011-08-09	Dusk	7	112	2	56	26	30	Winter	1
72	2011-08-10	Dusk	15	240	2	120	32	88	Winter	1
77	2011-08-11	Dusk	5	80	2	40	59.3	-19.3	Winter	1
82	2011-08-12	Dusk	12	192	3	64	49.7	14.3	Winter	1
87	2011-08-13	Dusk	64	1024	3	341.333	122	219.333	Winter	1
92	2011-08-14	Dusk	11	176	3	58.6667	45.7	12.9667	Winter	1
97	2011-08-15	Dusk	6	96	3	32	8	24	Winter	1
102	2011-08-16	Dusk	11	176	3	58.6667	45	13.6667	Winter	1
107	2011-08-17	Dusk	11	176	3	58.6667	44	14.6667	Winter	1
112	2011-08-18	Dusk	21	336	3	112	72.7	39.3	Winter	1
117	2011-08-19	Dusk	46	736	3	245.333	118.7	126.633	Winter	1
122	2011-08-20	Dusk	15	240	3	80	51.3	28.7	Winter	1
127	2011-08-21	Dusk	10	160	2	80	75.3	4.7	Winter	1
132	2011-08-22	Dusk	21	336	3	112	87.3	24.7	Winter	1
137	2011-08-23	Dusk	3	48	3	16	70	-54	Winter	1
142	2011-08-24	Dusk	26	416	2	208	77.3	130.7	Winter	1
147	2011-08-25	Dusk	2	32	2	16	37	-21	Winter	1
152	2011-08-26	Dusk	8	128	2	64	80.7	-16.7	Winter	1
157	2011-08-27	Dusk	6	96	2	48	48	0	Winter	1
162	2011-08-28	Dusk	7	112	2	56	28	28	Winter	1
167	2011-08-29	Dusk	5	80	2	40	41.3	-1.3	Winter	1
172	2011-08-30	Dusk	5	80	2	40	37.7	2.3	Winter	1
177	2011-08-31	Dusk	2	32	2	16	42	-26	Winter	1
182	2011-09-01	Dusk	2	32	2	16	31	-15	Spring	1
187	2011-09-02	Dusk	36	576	3	192	34	158	Spring	1
192	2011-09-03	Dusk	5	80	3	26.6667	16	10.6667	Spring	1
197	2011-09-04	Dusk	11	176	3	58.6667	19	39.6667	Spring	1
202	2011-09-05	Dusk	5	80	3	26.6667	22	4.66667	Spring	1
207	2011-09-06	Dusk	4	64	3	21.3333	83	-61.6667	Spring	1
212	2011-09-07	Dusk	13	208	3	69.3333	48	21.3333	Spring	1
217	2011-09-08	Dusk	1	16	3	5.33333	19.7	-14.3667	Spring	1
222	2011-09-09	Dusk	3	48	3	16	38	-22	Spring	1
227	2011-09-10	Dusk	15	240	2	120	28.7	91.3	Spring	1
232	2011-09-11	Dusk	16	256	2	128	45	83	Spring	1
237	2011-09-12	Dusk	7	112	2	56	61	-5	Spring	1
242	2011-09-13	Dusk	0	0	2	0	27	-27	Spring	0
247	2011-09-14	Dusk	3	48	2	24	33.3	-9.3	Spring	1
252	2011-09-15	Dusk	2	32	2	16	23.3	-7.3	Spring	1
257	2011-09-16	Dusk	0	0	2	0	21.7	-21.7	Spring	0
262	2011-09-17	Dusk	0	0	2	0	11	-11	Spring	0
267	2011-09-18	Dusk	1	16	2	8	23.3	-15.3	Spring	1
272	2011-09-19	Dusk	2	32	2	16	35.7	-19.7	Spring	1
277	2011-09-20	Dusk	8	128	2	64	62	2	Spring	1
282	2011-09-21	Dusk	5	80	12	6.66667	40.7	-34.0333	Spring	1
287	2011-09-22	Dusk	11	176	3	58.6667	26.7	31.9667	Spring	1
292	2011-09-23	Dusk	35	560	3	186.667	49	137.667	Spring	1
297	2011-09-24	Dusk	0	0	3	0	38	-38	Spring	0
302	2011-09-25	Dusk	10	160	3	53.3333	21.6	31.7333	Spring	1
307	2011-09-26	Dusk	0	0	3	0	3	-3	Spring	0
312	2011-09-27	Dusk	0	0	3	0	2.6	-2.6	Spring	0
317	2011-09-28	Dusk	0	0	3	0	7.3	-7.3	Spring	0
322	2011-09-29	Dusk	0	0	3	0	23	-23	Spring	0
327	2011-09-30	Dusk	5	80	2	40	13	27	Spring	1
332	2011-10-01	Dusk	0	0	2	0	0	0	Spring	0
337	2011-10-02	Dusk	1	16	2	8	7.3	0.7	Spring	1
342	2011-10-03	Dusk	5	80	2	40	21.7	18.3	Spring	1
347	2011-10-04	Dusk	0	0	2	0	26	-26	Spring	0
352	2011-10-05	Dusk	0	0	2	0	8.3	-8.3	Spring	0
357	2011-10-06	Dusk	0	0	2	0	0.3	-0.3	Spring	0
362	2011-10-07	Dusk	0	0	2	0	0.3	-0.3	Spring	0
367	2011-10-08	Dusk	0	0	2	0	1.3	-1.3	Spring	0
372	2011-10-09	Dusk	2	32	2	16	24.7	-8.7	Spring	1
377	2011-10-10	Dusk	4	64	2	32	6.3	25.7	Spring	1
382	2011-10-11	Dusk	0	0	3	0	8	-8	Spring	0
387	2011-10-12	Dusk	0	0	3	0	1	-1	Spring	0
392	2011-10-13	Dusk	0	0	3	0	3.7	-3.7	Spring	0
397	2011-10-14	Dusk	3	48	3	16	3.7	12.3	Spring	1
402	2011-10-15	Dusk	0	0	3	0	4.3	-4.3	Spring	0
407	2011-10-16	Dusk	0	0	3	0	1.3	-1.3	Spring	0
412	2011-10-17	Dusk	0	0	3	0	0	0	Spring	0
417	2011-10-18	Dusk	0	0	2	0	1.3	-1.3	Spring	0
422	2011-10-19	Dusk	3	48	2	24	2.7	21.3	Spring	1
427	2011-10-20	Dusk	4	64	2	32	5	27	Spring	1
432	2011-10-21	Dusk	0	0	2	0	5.7	-5.7	Spring	0
437	2011-10-22	Dusk	1	16	2	8	14.3	-6.3	Spring	1
442	2011-10-23	Dusk	0	0	2	0	24	-24	Spring	0
447	2011-10-24	Dusk	14	224	3	74.6667	36	38.6667	Spring	1
452	2011-10-25	Dusk	0	0	3	0	75.3	-75.3	Spring	0
457	2011-10-26	Dusk	7	112	3	37.3333	23.7	13.6333	Spring	1
462	2011-10-27	Dusk	4	64	3	21.3333	25.7	-4.36667	Spring	1
467	2011-10-28	Dusk	0	0	3	0	10.7	-10.7	Spring	0
472	2011-10-29	Dusk	0	0	2	0	4	-4	Spring	0
477	2011-10-30	Dusk	8	128	3	42.6667	37	5.66667	Spring	1
482	2011-10-31	Dusk	0	0	2	0	0.3	-0.3	Spring	0
487	2011-11-01	Dusk	0	0	2	0	2.7	-2.7	Spring	0
492	2011-11-02	Dusk	1	16	3	5.33333	0.7	4.63333	Spring	1
497	2011-11-03	Dusk	0	0	3	0	17	-17	Spring	0
502	2011-11-04	Dusk	0	0	3	0	4.7	-4.7	Spring	0
507	2011-11-05	Dusk	0	0	2	0	0	0	Spring	0
512	2011-11-06	Dusk	0	0	3	0	0	0	Spring	0
517	2011-11-07	Dusk	2	32	3	10.6667	7.3	3.36667	Spring	1
522	2011-11-08	Dusk	0	0	3	0	10.7	-10.7	Spring	0
527	2011-11-09	Dusk	0	0	3	0	1.3	-1.3	Spring	0
532	2011-11-10	Dusk	0	0	3	0	5.3	-5.3	Spring	0
537	2011-11-11	Dusk	4	64	3	21.3333	11.3	10.0333	Spring	1
542	2011-11-12	Dusk	0	0	3	0	3.7	-3.7	Spring	0
547	2011-11-13	Dusk	11	176	3	58.6667	8.3	50.3667	Spring	1
552	2011-11-14	Dusk	0	0	3	0	18.7	-18.7	Spring	0
557	2011-11-15	Dusk	7	112	3	37.3333	3	34.3333	Spring	1
562	2011-11-16	Dusk	0	0	3	0	2	-2	Spring	0
567	2011-11-17	Dusk	4	64	3	21.3333	5.7	15.6333	Spring	1
572	2011-11-18	Dusk	5	80	3	26.6667	4.7	21.9667	Spring	1
577	2011-11-19	Dusk	5	80	4	20	5.3	14.7	Spring	1
582	2011-11-20	Dusk	0	0	4	0	0	0	Spring	0
587	2011-11-21	Dusk	0	0	4	0	0	0	Spring	0
592	2011-11-22	Dusk	0	0	3	0	0	0	Spring	0
597	2011-11-23	Dusk	0	0	3	0	0	0	Spring	0
602	2011-11-24	Dusk	0	0	3	0	0	0	Spring	0
607	2011-11-25	Dusk	0	0	3	0	0	0	Spring	0
612	2011-11-26	Dusk	0	0	3	0	0	0	Spring	0
617	2011-11-27	Dusk	0	0	3	0	0	0	Spring	0
622	2011-11-28	Dusk	0	0	3	0	0	0	Spring	0
627	2011-11-29	Dusk	0	0	3	0	1.7	-1.7	Spring	0
632	2011-11-30	Dusk	2	32	3	10.6667	4.3	6.36667	Spring	1
637	2011-12-01	Dusk	0	0	4	0	6.3	-6.3	Summer	0
642	2011-12-02	Dusk	0	0	4	0	0	0	Summer	0
647	2011-12-03	Dusk	0	0	4	0	0	0	Summer	0
652	2011-12-04	Dusk	0	0	4	0	0	0	Summer	0
657	2011-12-05	Dusk	0	0	4	0	0	0	Summer	0
662	2011-12-06	Dusk	0	0	4	0	0	0	Summer	0
667	2011-12-07	Dusk	0	0	4	0	0	0	Summer	0
672	2011-12-08	Dusk	0	0	4	0	0	0	Summer	0
677	2011-12-09	Dusk	0	0	4	0	0	0	Summer	0
682	2011-12-10	Dusk	0	0	4	0	0	0	Summer	0
687	2011-12-11	Dusk	0	0	4	0	0	0	Summer	0
692	2011-12-12	Dusk	0	0	4	0	0	0	Summer	0
697	2011-12-13	Dusk	0	0	4	0	0	0	Summer	0
702	2011-12-14	Dusk	0	0	4	0	0	0	Summer	0
707	2011-12-15	Dusk	0	0	4	0	0	0	Summer	0
712	2011-12-16	Dusk	0	0	3	0	0	0	Summer	0
717	2011-12-17	Dusk	0	0	3	0	0	0	Summer	0
722	2011-12-18	Dusk	0	0	3	0	0	0	Summer	0
727	2011-12-19	Dusk	0	0	4	0	0	0	Summer	0
732	2011-12-20	Dusk	0	0	3	0	0	0	Summer	0
737	2011-12-21	Dusk	0	0	4	0	0	0	Summer	0
742	2011-12-22	Dusk	0	0	4	0	0	0	Summer	0
747	2011-12-23	Dusk	0	0	4	0	0	0	Summer	0
752	2011-12-24	Dusk	0	0	4	0	1.7	-1.7	Summer	0
757	2011-12-25	Dusk	0	0	4	0	0	0	Summer	0
762	2011-12-26	Dusk	0	0	4	0	0	0	Summer	0
767	2011-12-27	Dusk	0	0	4	0	0	0	Summer	0
772	2011-12-28	Dusk	0	0	4	0	0	0	Summer	0
777	2011-12-29	Dusk	0	0	4	0	0	0	Summer	0
782	2011-12-30	Dusk	0	0	3	0	0	0	Summer	0
787	2011-12-31	Dusk	0	0	4	0	0	0	Summer	0
792	2012-01-01	Dusk	0	0	4	0	0	0	Summer	0
797	2012-01-02	Dusk	0	0	3	0	0	0	Summer	0
802	2012-01-03	Dusk	0	0	3	0	0	0	Summer	0
807	2012-01-04	Dusk	0	0	4	0	0	0	Summer	0
812	2012-01-05	Dusk	0	0	3	0	0	0	Summer	0
817	2012-01-06	Dusk	0	0	3	0	0	0	Summer	0
822	2012-01-07	Dusk	0	0	3	0	0	0	Summer	0
827	2012-01-08	Dusk	0	0	3	0	0	0	Summer	0
832	2012-01-09	Dusk	0	0	3	0	0	0	Summer	0
837	2012-01-10	Dusk	0	0	3	0	0	0	Summer	0
842	2012-01-11	Dusk	0	0	3	0	0	0	Summer	0
847	2012-01-12	Dusk	0	0	3	0	0	0	Summer	0
852	2012-01-13	Dusk	0	0	3	0	0	0	Summer	0
857	2012-01-14	Dusk	0	0	3	0	0	0	Summer	0
862	2012-01-15	Dusk	0	0	3	0	0	0	Summer	0
867	2012-01-16	Dusk	0	0	4	0	0	0	Summer	0
872	2012-01-17	Dusk	0	0	4	0	0	0	Summer	0
877	2012-01-18	Dusk	0	0	4	0	0	0	Summer	0
882	2012-01-19	Dusk	0	0	4	0	0	0	Summer	0
887	2012-01-20	Dusk	0	0	4	0	0	0	Summer	0
892	2012-01-21	Dusk	0	0	4	0	0	0	Summer	0
897	2012-01-22	Dusk	0	0	4	0	0	0	Summer	0
902	2012-01-23	Dusk	0	0	4	0	0	0	Summer	0
907	2012-01-24	Dusk	0	0	3	0	0	0	Summer	0
912	2012-01-25	Dusk	0	0	3	0	0	0	Summer	0
917	2012-01-26	Dusk	0	0	3	0	0	0	Summer	0
922	2012-01-27	Dusk	0	0	3	0	0	0	Summer	0
927	2012-01-28	Dusk	0	0	3	0	0	0	Summer	0
932	2012-01-29	Dusk	0	0	3	0	0	0	Summer	0
937	2012-01-30	Dusk	0	0	3	0	0	0	Summer	0
942	2012-01-31	Dusk	0	0	3	0	0	0	Summer	0
947	2012-02-01	Dusk	0	0	3	0	0	0	Summer	0
952	2012-02-02	Dusk	0	0	3	0	0	0	Summer	0
957	2012-02-03	Dusk	0	0	3	0	0	0	Summer	0
962	2012-02-04	Dusk	0	0	3	0	0	0	Summer	0
967	2012-02-05	Dusk	0	0	3	0	0	0	Summer	0
972	2012-02-06	Dusk	0	0	3	0	0	0	Summer	0
977	2012-02-07	Dusk	0	0	3	0	0	0	Summer	0
982	2012-02-08	Dusk	0	0	3	0	0	0	Summer	0
987	2012-02-09	Dusk	0	0	3	0	0	0	Summer	0
992	2012-02-10	Dusk	0	0	3	0	0	0	Summer	0
997	2012-02-11	Dusk	0	0	3	0	0	0	Summer	0
1002	2012-02-12	Dusk	0	0	3	0	0	0	Summer	0
1007	2012-02-13	Dusk	0	0	3	0	0	0	Summer	0
1012	2012-02-14	Dusk	0	0	3	0	0	0	Summer	0
1017	2012-02-15	Dusk	0	0	3	0	0	0	Summer	0
1022	2012-02-16	Dusk	0	0	3	0	0	0	Summer	0
1027	2012-02-17	Dusk	0	0	3	0	0	0	Summer	0
1032	2012-02-18	Dusk	0	0	3	0	0	0	Summer	0
1037	2012-02-19	Dusk	0	0	2	0	0	0	Summer	0
1042	2012-02-20	Dusk	0	0	2	0	0	0	Summer	0
1047	2012-02-21	Dusk	0	0	2	0	0	0	Summer	0
1052	2012-02-22	Dusk	0	0	2	0	0	0	Summer	0
1057	2012-02-23	Dusk	0	0	2	0	0	0	Summer	0
1062	2012-02-24	Dusk	0	0	2	0	0	0	Summer	0
1067	2012-02-25	Dusk	0	0	3	0	0	0	Summer	0
1072	2012-02-26	Dusk	0	0	3	0	0	0	Summer	0
1077	2012-02-27	Dusk	0	0	3	0	0	0	Summer	0
1082	2012-02-28	Dusk	0	0	3	0	0	0	Summer	0
1087	2012-02-29	Dusk	0	0	3	0	0	0	Summer	0
1097	2012-03-02	Dusk	0	0	3	0	0	0	Autumn	0
1102	2012-03-03	Dusk	0	0	2	0	0	0	Autumn	0
1107	2012-03-04	Dusk	0	0	2	0	0	0	Autumn	0
1112	2012-03-05	Dusk	0	0	2	0	0	0	Autumn	0
1117	2012-03-06	Dusk	0	0	2	0	0	0	Autumn	0
1122	2012-03-07	Dusk	0	0	2	0	0	0	Autumn	0
1127	2012-03-08	Dusk	0	0	2	0	0	0	Autumn	0
1132	2012-03-09	Dusk	0	0	3	0	0	0	Autumn	0
1137	2012-03-10	Dusk	0	0	3	0	0	0	Autumn	0
1142	2012-03-11	Dusk	0	0	3	0	0	0	Autumn	0
1147	2012-03-12	Dusk	0	0	3	0	0	0	Autumn	0
1152	2012-03-13	Dusk	0	0	3	0	0	0	Autumn	0
1157	2012-03-14	Dusk	0	0	3	0	0	0	Autumn	0
1162	2012-03-15	Dusk	0	0	2	0	0	0	Autumn	0
1167	2012-03-16	Dusk	0	0	2	0	0	0	Autumn	0
1172	2012-03-17	Dusk	0	0	2	0	0	0	Autumn	0
1177	2012-03-18	Dusk	0	0	2	0	0	0	Autumn	0
1182	2012-03-19	Dusk	0	0	2	0	0	0	Autumn	0
1187	2012-03-20	Dusk	0	0	2	0	6.3	-6.3	Autumn	0
1192	2012-03-21	Dusk	0	0	2	0	0	0	Autumn	0
1197	2012-03-22	Dusk	0	0	2	0	0	0	Autumn	0
1202	2012-03-23	Dusk	0	0	3	0	0	0	Autumn	0
1207	2012-03-24	Dusk	0	0	3	0	0	0	Autumn	0
1212	2012-03-25	Dusk	0	0	3	0	0	0	Autumn	0
1217	2012-03-26	Dusk	0	0	3	0	0	0	Autumn	0
1222	2012-03-27	Dusk	0	0	3	0	0	0	Autumn	0
1227	2012-03-28	Dusk	0	0	2	0	0	0	Autumn	0
1232	2012-03-29	Dusk	0	0	2	0	0	0	Autumn	0
1237	2012-03-30	Dusk	0	0	2	0	0	0	Autumn	0
1242	2012-03-31	Dusk	0	0	2	0	0	0	Autumn	0
1247	2012-04-01	Dusk	0	0	2	0	0	0	Autumn	0
1252	2012-04-02	Dusk	0	0	2	0	0	0	Autumn	0
1257	2012-04-03	Dusk	0	0	2	0	0	0	Autumn	0
1262	2012-04-04	Dusk	0	0	2	0	0	0	Autumn	0
1267	2012-04-05	Dusk	0	0	3	0	0	0	Autumn	0
1272	2012-04-06	Dusk	0	0	3	0	0	0	Autumn	0
1277	2012-04-07	Dusk	0	0	3	0	0	0	Autumn	0
1282	2012-04-08	Dusk	0	0	3	0	0	0	Autumn	0
1287	2012-04-09	Dusk	0	0	3	0	0	0	Autumn	0
1292	2012-04-10	Dusk	0	0	3	0	0	0	Autumn	0
1297	2012-04-11	Dusk	0	0	2	0	0	0	Autumn	0
1302	2012-04-12	Dusk	0	0	2	0	0	0	Autumn	0
1307	2012-04-13	Dusk	0	0	2	0	0	0	Autumn	0
1312	2012-04-14	Dusk	0	0	2	0	0	0	Autumn	0
1317	2012-04-15	Dusk	0	0	2	0	7	-7	Autumn	0
1322	2012-04-16	Dusk	0	0	2	0	0	0	Autumn	0
1327	2012-04-17	Dusk	0	0	2	0	0	0	Autumn	0
1332	2012-04-18	Dusk	0	0	2	0	0	0	Autumn	0
1337	2012-04-19	Dusk	0	0	2	0	0	0	Autumn	0
1342	2012-04-20	Dusk	0	0	3	0	0	0	Autumn	0
1347	2012-04-21	Dusk	0	0	3	0	0	0	Autumn	0
1352	2012-04-22	Dusk	1	16	3	5.33333	0.3	5.03333	Autumn	1
1357	2012-04-23	Dusk	0	0	3	0	0	0	Autumn	0
1362	2012-04-24	Dusk	0	0	3	0	1	-1	Autumn	0
1367	2012-04-25	Dusk	0	0	3	0	0	0	Autumn	0
1372	2012-04-26	Dusk	0	0	3	0	0	0	Autumn	0
1377	2012-04-27	Dusk	0	0	2	0	0	0	Autumn	0
1382	2012-04-28	Dusk	0	0	3	0	0	0	Autumn	0
1387	2012-04-29	Dusk	0	0	2	0	0	0	Autumn	0
1392	2012-04-30	Dusk	0	0	2	0	0	0	Autumn	0
1397	2012-05-01	Dusk	0	0	2	0	0	0	Autumn	0
1402	2012-05-02	Dusk	0	0	2	0	0	0	Autumn	0
1407	2012-05-03	Dusk	0	0	2	0	0	0	Autumn	0
1412	2012-05-04	Dusk	0	0	2	0	1.3	-1.3	Autumn	0
1417	2012-05-05	Dusk	3	48	3	16	7	9	Autumn	1
1422	2012-05-06	Dusk	0	0	3	0	8.7	-8.7	Autumn	0
1427	2012-05-07	Dusk	0	0	3	0	1.3	-1.3	Autumn	0
1432	2012-05-08	Dusk	0	0	3	0	0	0	Autumn	0
1437	2012-05-09	Dusk	0	0	3	0	0.3	-0.3	Autumn	0
1442	2012-05-10	Dusk	3	48	3	16	10.7	5.3	Autumn	1
1447	2012-05-11	Dusk	0	0	3	0	0	0	Autumn	0
1452	2012-05-12	Dusk	0	0	3	0	2.3	-2.3	Autumn	0
1457	2012-05-13	Dusk	0	0	3	0	7	-7	Autumn	0
1462	2012-05-14	Dusk	0	0	3	0	12.7	-12.7	Autumn	0
1467	2012-05-15	Dusk	4	64	3	21.3333	25.3	-3.96667	Autumn	1
1472	2012-05-16	Dusk	0	0	3	0	15.7	-15.7	Autumn	0
1477	2012-05-17	Dusk	6	96	3	32	25.7	6.3	Autumn	1
1482	2012-05-18	Dusk	0	0	2	0	19	-19	Autumn	0
1487	2012-05-19	Dusk	9	144	2	72	14.7	57.3	Autumn	1
1492	2012-05-20	Dusk	10	160	2	80	26.3	53.7	Autumn	1
1497	2012-05-21	Dusk	2	32	3	10.6667	30.3	-19.6333	Autumn	1
1502	2012-05-22	Dusk	10	160	2	80	60.7	19.3	Autumn	1
1507	2012-05-23	Dusk	0	0	2	0	116.3	-116.3	Autumn	0
5	2011-07-23	Morning	9	216	8	27	81.5	-54.5	Winter	1
10	2011-07-24	Morning	18	432	8	54	112	-58	Winter	1
15	2011-07-25	Morning	36	864	8	108	118	-10	Winter	1
20	2011-07-26	Morning	28	672	8	84	78.5	5.5	Winter	1
25	2011-07-27	Morning	19	456	8	57	82	-25	Winter	1
30	2011-07-28	Morning	1	24	8	3	44	-41	Winter	1
35	2011-07-29	Morning	7	168	8	21	51.5	-30.5	Winter	1
40	2011-07-30	Morning	53	1272	8	159	69	90	Winter	1
45	2011-07-31	Morning	6	144	8	18	41	-23	Winter	1
50	2011-08-01	Morning	8	192	5	38.4	71	-32.6	Winter	1
55	2011-08-07	Morning	30	480	9	53.3333	111.3	-57.9667	Winter	1
60	2011-08-08	Morning	27	432	9	48	37	11	Winter	1
65	2011-08-09	Morning	2	32	9	3.55556	26	-22.4444	Winter	1
70	2011-08-10	Morning	12	192	9	21.3333	32	-10.6667	Winter	1
75	2011-08-11	Morning	39	624	9	69.3333	59.3	10.0333	Winter	1
80	2011-08-12	Morning	14	224	7	32	49.7	-17.7	Winter	1
85	2011-08-13	Morning	92	1472	9	163.556	122	41.5556	Winter	1
90	2011-08-14	Morning	31	496	9	55.1111	45.7	9.41111	Winter	1
95	2011-08-15	Morning	33	528	9	58.6667	8	50.6667	Winter	1
100	2011-08-16	Morning	28	448	9	49.7778	45	4.77778	Winter	1
105	2011-08-17	Morning	24	384	9	42.6667	44	-1.33333	Winter	1
110	2011-08-18	Morning	14	224	10	22.4	72.7	-50.3	Winter	1
115	2011-08-19	Morning	63	1008	10	100.8	118.7	-17.9	Winter	1
120	2011-08-20	Morning	16	256	10	25.6	51.3	-25.7	Winter	1
125	2011-08-21	Morning	36	576	10	57.6	75.3	-17.7	Winter	1
130	2011-08-22	Morning	20	320	10	32	87.3	-55.3	Winter	1
135	2011-08-23	Morning	36	576	10	57.6	70	-12.4	Winter	1
140	2011-08-24	Morning	24	384	10	38.4	77.3	-38.9	Winter	1
145	2011-08-25	Morning	14	224	10	22.4	37	-14.6	Winter	1
150	2011-08-26	Morning	41	656	10	65.6	80.7	-15.1	Winter	1
155	2011-08-27	Morning	13	208	10	20.8	48	-27.2	Winter	1
160	2011-08-28	Morning	2	32	11	2.90909	28	-25.0909	Winter	1
165	2011-08-29	Morning	22	352	11	32	41.3	-9.3	Winter	1
170	2011-08-30	Morning	10	160	10	16	37.7	-21.7	Winter	1
175	2011-08-31	Morning	8	128	10	12.8	42	-29.2	Winter	1
180	2011-09-01	Morning	6	96	11	8.72727	31	-22.2727	Spring	1
185	2011-09-02	Morning	1	16	11	1.45455	34	-32.5455	Spring	1
190	2011-09-03	Morning	7	112	11	10.1818	16	-5.81818	Spring	1
195	2011-09-04	Morning	3	48	11	4.36364	19	-14.6364	Spring	1
200	2011-09-05	Morning	15	240	11	21.8182	22	-0.181818	Spring	1
205	2011-09-06	Morning	59	944	11	85.8182	83	2.81818	Spring	1
210	2011-09-07	Morning	8	128	11	11.6364	48	-36.3636	Spring	1
215	2011-09-08	Morning	20	320	11	29.0909	19.7	9.39091	Spring	1
220	2011-09-09	Morning	8	128	11	11.6364	38	-26.3636	Spring	1
225	2011-09-10	Morning	19	304	11	27.6364	28.7	-1.06364	Spring	1
230	2011-09-11	Morning	18	288	11	26.1818	45	-18.8182	Spring	1
235	2011-09-12	Morning	10	160	11	14.5455	61	-46.4545	Spring	1
240	2011-09-13	Morning	3	48	11	4.36364	27	-22.6364	Spring	1
245	2011-09-14	Morning	15	240	11	21.8182	33.3	-11.4818	Spring	1
250	2011-09-15	Morning	23	368	11	33.4545	23.3	10.1545	Spring	1
255	2011-09-16	Morning	7	112	12	9.33333	21.7	-12.3667	Spring	1
260	2011-09-17	Morning	0	0	12	0	11	-11	Spring	0
265	2011-09-18	Morning	18	288	12	24	23.3	0.7	Spring	1
270	2011-09-19	Morning	25	400	12	33.3333	35.7	-2.36667	Spring	1
275	2011-09-20	Morning	21	336	12	28	62	-34	Spring	1
280	2011-09-21	Morning	16	256	12	21.3333	40.7	-19.3667	Spring	1
285	2011-09-22	Morning	13	208	12	17.3333	26.7	-9.36667	Spring	1
290	2011-09-23	Morning	5	80	12	6.66667	49	-42.3333	Spring	1
295	2011-09-24	Morning	13	208	12	17.3333	38	-20.6667	Spring	1
300	2011-09-25	Morning	0	0	12	0	21.6	-21.6	Spring	0
305	2011-09-26	Morning	3	48	12	4	3	1	Spring	1
310	2011-09-27	Morning	2	32	12	2.66667	2.6	0.0666667	Spring	1
315	2011-09-28	Morning	0	0	12	0	7.3	-7.3	Spring	0
320	2011-09-29	Morning	24	384	13	29.5385	23	6.53846	Spring	1
325	2011-09-30	Morning	0	0	13	0	13	-13	Spring	0
330	2011-10-01	Morning	0	0	13	0	0	0	Spring	0
335	2011-10-02	Morning	0	0	13	0	7.3	-7.3	Spring	0
340	2011-10-03	Morning	2	32	13	2.46154	21.7	-19.2385	Spring	1
345	2011-10-04	Morning	22	352	13	27.0769	26	1.07692	Spring	1
350	2011-10-05	Morning	2	32	8	4	8.3	-4.3	Spring	1
355	2011-10-06	Morning	0	0	13	0	0.3	-0.3	Spring	0
360	2011-10-07	Morning	0	0	13	0	0.3	-0.3	Spring	0
365	2011-10-08	Morning	0	0	13	0	1.3	-1.3	Spring	0
370	2011-10-09	Morning	8	128	13	9.84615	24.7	-14.8538	Spring	1
375	2011-10-10	Morning	1	16	13	1.23077	6.3	-5.06923	Spring	1
380	2011-10-11	Morning	20	320	13	24.6154	8	16.6154	Spring	1
385	2011-10-12	Morning	0	0	13	0	1	-1	Spring	0
390	2011-10-13	Morning	2	32	14	2.28571	3.7	-1.41429	Spring	1
395	2011-10-14	Morning	7	112	14	8	3.7	4.3	Spring	1
400	2011-10-15	Morning	9	144	15	9.6	4.3	5.3	Spring	1
405	2011-10-16	Morning	0	0	15	0	1.3	-1.3	Spring	0
410	2011-10-17	Morning	0	0	15	0	0	0	Spring	0
415	2011-10-18	Morning	0	0	15	0	1.3	-1.3	Spring	0
420	2011-10-19	Morning	0	0	15	0	2.7	-2.7	Spring	0
425	2011-10-20	Morning	4	64	14	4.57143	5	-0.428571	Spring	1
430	2011-10-21	Morning	0	0	15	0	5.7	-5.7	Spring	0
435	2011-10-22	Morning	18	288	14	20.5714	14.3	6.27143	Spring	1
440	2011-10-23	Morning	19	304	14	21.7143	24	-2.28571	Spring	1
445	2011-10-24	Morning	13	208	14	14.8571	36	-21.1429	Spring	1
450	2011-10-25	Morning	86	1376	14	98.2857	75.3	22.9857	Spring	1
455	2011-10-26	Morning	8	128	14	9.14286	23.7	-14.5571	Spring	1
460	2011-10-27	Morning	44	704	15	46.9333	25.7	21.2333	Spring	1
465	2011-10-28	Morning	7	112	15	7.46667	10.7	-3.23333	Spring	1
470	2011-10-29	Morning	2	32	15	2.13333	4	-1.86667	Spring	1
475	2011-10-30	Morning	34	544	15	36.2667	37	-0.733333	Spring	1
480	2011-10-31	Morning	1	16	16	1	0.3	0.7	Spring	1
485	2011-11-01	Morning	0	0	15	0	2.7	-2.7	Spring	0
490	2011-11-02	Morning	2	32	15	2.13333	0.7	1.43333	Spring	1
495	2011-11-03	Morning	12	192	15	12.8	17	-4.2	Spring	1
500	2011-11-04	Morning	7	112	15	7.46667	4.7	2.76667	Spring	1
505	2011-11-05	Morning	0	0	15	0	0	0	Spring	0
510	2011-11-06	Morning	0	0	16	0	0	0	Spring	0
515	2011-11-07	Morning	0	0	16	0	7.3	-7.3	Spring	0
520	2011-11-08	Morning	1	16	15	1.06667	10.7	-9.63333	Spring	1
525	2011-11-09	Morning	2	32	15	2.13333	1.3	0.833333	Spring	1
530	2011-11-10	Morning	0	0	15	0	5.3	-5.3	Spring	0
535	2011-11-11	Morning	19	304	15	20.2667	11.3	8.96667	Spring	1
540	2011-11-12	Morning	8	128	15	8.53333	3.7	4.83333	Spring	1
545	2011-11-13	Morning	13	208	15	13.8667	8.3	5.56667	Spring	1
550	2011-11-14	Morning	0	0	16	0	18.7	-18.7	Spring	0
555	2011-11-15	Morning	2	32	16	2	3	-1	Spring	1
560	2011-11-16	Morning	0	0	16	0	2	-2	Spring	0
565	2011-11-17	Morning	0	0	16	0	5.7	-5.7	Spring	0
570	2011-11-18	Morning	0	0	16	0	4.7	-4.7	Spring	0
575	2011-11-19	Morning	2	32	16	2	5.3	-3.3	Spring	1
580	2011-11-20	Morning	0	0	16	0	0	0	Spring	0
585	2011-11-21	Morning	0	0	16	0	0	0	Spring	0
590	2011-11-22	Morning	0	0	16	0	0	0	Spring	0
595	2011-11-23	Morning	0	0	16	0	0	0	Spring	0
600	2011-11-24	Morning	0	0	16	0	0	0	Spring	0
605	2011-11-25	Morning	0	0	16	0	0	0	Spring	0
610	2011-11-26	Morning	0	0	16	0	0	0	Spring	0
615	2011-11-27	Morning	0	0	16	0	0	0	Spring	0
620	2011-11-28	Morning	0	0	16	0	0	0	Spring	0
625	2011-11-29	Morning	0	0	16	0	1.7	-1.7	Spring	0
630	2011-11-30	Morning	2	32	17	1.88235	4.3	-2.41765	Spring	1
635	2011-12-01	Morning	0	0	16	0	6.3	-6.3	Summer	0
640	2011-12-02	Morning	0	0	16	0	0	0	Summer	0
645	2011-12-03	Morning	0	0	16	0	0	0	Summer	0
650	2011-12-04	Morning	0	0	16	0	0	0	Summer	0
655	2011-12-05	Morning	0	0	16	0	0	0	Summer	0
660	2011-12-06	Morning	0	0	16	0	0	0	Summer	0
665	2011-12-07	Morning	0	0	16	0	0	0	Summer	0
670	2011-12-08	Morning	0	0	16	0	0	0	Summer	0
675	2011-12-09	Morning	0	0	16	0	0	0	Summer	0
680	2011-12-10	Morning	0	0	16	0	0	0	Summer	0
685	2011-12-11	Morning	0	0	16	0	0	0	Summer	0
690	2011-12-12	Morning	0	0	16	0	0	0	Summer	0
695	2011-12-13	Morning	0	0	16	0	0	0	Summer	0
700	2011-12-14	Morning	0	0	16	0	0	0	Summer	0
705	2011-12-15	Morning	0	0	16	0	0	0	Summer	0
710	2011-12-16	Morning	0	0	16	0	0	0	Summer	0
715	2011-12-17	Morning	0	0	16	0	0	0	Summer	0
720	2011-12-18	Morning	0	0	16	0	0	0	Summer	0
725	2011-12-19	Morning	0	0	16	0	0	0	Summer	0
730	2011-12-20	Morning	0	0	16	0	0	0	Summer	0
735	2011-12-21	Morning	0	0	16	0	0	0	Summer	0
740	2011-12-22	Morning	0	0	16	0	0	0	Summer	0
745	2011-12-23	Morning	0	0	16	0	0	0	Summer	0
750	2011-12-24	Morning	0	0	16	0	1.7	-1.7	Summer	0
755	2011-12-25	Morning	0	0	16	0	0	0	Summer	0
760	2011-12-26	Morning	0	0	16	0	0	0	Summer	0
765	2011-12-27	Morning	0	0	16	0	0	0	Summer	0
770	2011-12-28	Morning	0	0	16	0	0	0	Summer	0
775	2011-12-29	Morning	0	0	16	0	0	0	Summer	0
780	2011-12-30	Morning	0	0	16	0	0	0	Summer	0
785	2011-12-31	Morning	0	0	16	0	0	0	Summer	0
790	2012-01-01	Morning	0	0	16	0	0	0	Summer	0
795	2012-01-02	Morning	0	0	16	0	0	0	Summer	0
800	2012-01-03	Morning	0	0	16	0	0	0	Summer	0
805	2012-01-04	Morning	0	0	16	0	0	0	Summer	0
810	2012-01-05	Morning	0	0	16	0	0	0	Summer	0
815	2012-01-06	Morning	0	0	16	0	0	0	Summer	0
820	2012-01-07	Morning	0	0	16	0	0	0	Summer	0
825	2012-01-08	Morning	0	0	16	0	0	0	Summer	0
830	2012-01-09	Morning	0	0	16	0	0	0	Summer	0
835	2012-01-10	Morning	0	0	16	0	0	0	Summer	0
840	2012-01-11	Morning	0	0	16	0	0	0	Summer	0
845	2012-01-12	Morning	0	0	17	0	0	0	Summer	0
850	2012-01-13	Morning	0	0	16	0	0	0	Summer	0
855	2012-01-14	Morning	0	0	16	0	0	0	Summer	0
860	2012-01-15	Morning	0	0	16	0	0	0	Summer	0
865	2012-01-16	Morning	0	0	16	0	0	0	Summer	0
870	2012-01-17	Morning	0	0	16	0	0	0	Summer	0
875	2012-01-18	Morning	0	0	15	0	0	0	Summer	0
880	2012-01-19	Morning	0	0	16	0	0	0	Summer	0
885	2012-01-20	Morning	0	0	15	0	0	0	Summer	0
890	2012-01-21	Morning	0	0	16	0	0	0	Summer	0
895	2012-01-22	Morning	0	0	16	0	0	0	Summer	0
900	2012-01-23	Morning	0	0	16	0	0	0	Summer	0
905	2012-01-24	Morning	0	0	16	0	0	0	Summer	0
910	2012-01-25	Morning	0	0	16	0	0	0	Summer	0
915	2012-01-26	Morning	0	0	16	0	0	0	Summer	0
920	2012-01-27	Morning	0	0	16	0	0	0	Summer	0
925	2012-01-28	Morning	0	0	16	0	0	0	Summer	0
930	2012-01-29	Morning	0	0	15	0	0	0	Summer	0
935	2012-01-30	Morning	0	0	16	0	0	0	Summer	0
940	2012-01-31	Morning	0	0	13	0	0	0	Summer	0
945	2012-02-01	Morning	0	0	15	0	0	0	Summer	0
950	2012-02-02	Morning	0	0	15	0	0	0	Summer	0
955	2012-02-03	Morning	0	0	15	0	0	0	Summer	0
960	2012-02-04	Morning	0	0	15	0	0	0	Summer	0
965	2012-02-05	Morning	0	0	15	0	0	0	Summer	0
970	2012-02-06	Morning	0	0	15	0	0	0	Summer	0
975	2012-02-07	Morning	0	0	15	0	0	0	Summer	0
980	2012-02-08	Morning	0	0	15	0	0	0	Summer	0
985	2012-02-09	Morning	0	0	15	0	0	0	Summer	0
990	2012-02-10	Morning	0	0	15	0	0	0	Summer	0
995	2012-02-11	Morning	0	0	15	0	0	0	Summer	0
1000	2012-02-12	Morning	0	0	15	0	0	0	Summer	0
1005	2012-02-13	Morning	0	0	15	0	0	0	Summer	0
1010	2012-02-14	Morning	0	0	15	0	0	0	Summer	0
1015	2012-02-15	Morning	0	0	15	0	0	0	Summer	0
1020	2012-02-16	Morning	0	0	15	0	0	0	Summer	0
1025	2012-02-17	Morning	0	0	14	0	0	0	Summer	0
1030	2012-02-18	Morning	0	0	14	0	0	0	Summer	0
1035	2012-02-19	Morning	0	0	14	0	0	0	Summer	0
1040	2012-02-20	Morning	0	0	14	0	0	0	Summer	0
1045	2012-02-21	Morning	0	0	14	0	0	0	Summer	0
1050	2012-02-22	Morning	0	0	14	0	0	0	Summer	0
1055	2012-02-23	Morning	0	0	14	0	0	0	Summer	0
1060	2012-02-24	Morning	0	0	14	0	0	0	Summer	0
1065	2012-02-25	Morning	0	0	14	0	0	0	Summer	0
1070	2012-02-26	Morning	0	0	14	0	0	0	Summer	0
1075	2012-02-27	Morning	0	0	14	0	0	0	Summer	0
1080	2012-02-28	Morning	0	0	14	0	0	0	Summer	0
1085	2012-02-29	Morning	0	0	14	0	0	0	Summer	0
1095	2012-03-02	Morning	0	0	14	0	0	0	Autumn	0
1100	2012-03-03	Morning	0	0	14	0	0	0	Autumn	0
1105	2012-03-04	Morning	0	0	14	0	0	0	Autumn	0
1110	2012-03-05	Morning	0	0	13	0	0	0	Autumn	0
1115	2012-03-06	Morning	0	0	13	0	0	0	Autumn	0
1120	2012-03-07	Morning	0	0	13	0	0	0	Autumn	0
1125	2012-03-08	Morning	0	0	13	0	0	0	Autumn	0
1130	2012-03-09	Morning	0	0	13	0	0	0	Autumn	0
1135	2012-03-10	Morning	0	0	13	0	0	0	Autumn	0
1140	2012-03-11	Morning	0	0	13	0	0	0	Autumn	0
1145	2012-03-12	Morning	0	0	13	0	0	0	Autumn	0
1150	2012-03-13	Morning	0	0	13	0	0	0	Autumn	0
1155	2012-03-14	Morning	0	0	13	0	0	0	Autumn	0
1160	2012-03-15	Morning	0	0	13	0	0	0	Autumn	0
1165	2012-03-16	Morning	0	0	13	0	0	0	Autumn	0
1170	2012-03-17	Morning	0	0	13	0	0	0	Autumn	0
1175	2012-03-18	Morning	0	0	13	0	0	0	Autumn	0
1180	2012-03-19	Morning	0	0	13	0	0	0	Autumn	0
1185	2012-03-20	Morning	0	0	13	0	6.3	-6.3	Autumn	0
1190	2012-03-21	Morning	0	0	13	0	0	0	Autumn	0
1195	2012-03-22	Morning	0	0	13	0	0	0	Autumn	0
1200	2012-03-23	Morning	0	0	12	0	0	0	Autumn	0
1205	2012-03-24	Morning	0	0	11	0	0	0	Autumn	0
1210	2012-03-25	Morning	0	0	11	0	0	0	Autumn	0
1215	2012-03-26	Morning	0	0	11	0	0	0	Autumn	0
1220	2012-03-27	Morning	0	0	11	0	0	0	Autumn	0
1225	2012-03-28	Morning	0	0	11	0	0	0	Autumn	0
1230	2012-03-29	Morning	0	0	11	0	0	0	Autumn	0
1235	2012-03-30	Morning	0	0	11	0	0	0	Autumn	0
1240	2012-03-31	Morning	0	0	11	0	0	0	Autumn	0
1245	2012-04-01	Morning	0	0	11	0	0	0	Autumn	0
1250	2012-04-02	Morning	0	0	12	0	0	0	Autumn	0
1255	2012-04-03	Morning	0	0	12	0	0	0	Autumn	0
1260	2012-04-04	Morning	0	0	11	0	0	0	Autumn	0
1265	2012-04-05	Morning	0	0	11	0	0	0	Autumn	0
1270	2012-04-06	Morning	0	0	11	0	0	0	Autumn	0
1275	2012-04-07	Morning	0	0	11	0	0	0	Autumn	0
1280	2012-04-08	Morning	0	0	11	0	0	0	Autumn	0
1285	2012-04-09	Morning	0	0	10	0	0	0	Autumn	0
1290	2012-04-10	Morning	0	0	11	0	0	0	Autumn	0
1295	2012-04-11	Morning	0	0	10	0	0	0	Autumn	0
1300	2012-04-12	Morning	0	0	10	0	0	0	Autumn	0
1305	2012-04-13	Morning	0	0	10	0	0	0	Autumn	0
1310	2012-04-14	Morning	0	0	10	0	0	0	Autumn	0
1315	2012-04-15	Morning	0	0	10	0	7	-7	Autumn	0
1320	2012-04-16	Morning	0	0	10	0	0	0	Autumn	0
1325	2012-04-17	Morning	0	0	10	0	0	0	Autumn	0
1330	2012-04-18	Morning	0	0	10	0	0	0	Autumn	0
1335	2012-04-19	Morning	0	0	10	0	0	0	Autumn	0
1340	2012-04-20	Morning	0	0	10	0	0	0	Autumn	0
1345	2012-04-21	Morning	0	0	10	0	0	0	Autumn	0
1350	2012-04-22	Morning	0	0	10	0	0.3	-0.3	Autumn	0
1355	2012-04-23	Morning	0	0	10	0	0	0	Autumn	0
1360	2012-04-24	Morning	0	0	10	0	1	-1	Autumn	0
1365	2012-04-25	Morning	0	0	10	0	0	0	Autumn	0
1370	2012-04-26	Morning	0	0	10	0	0	0	Autumn	0
1375	2012-04-27	Morning	0	0	10	0	0	0	Autumn	0
1380	2012-04-28	Morning	0	0	9	0	0	0	Autumn	0
1385	2012-04-29	Morning	0	0	10	0	0	0	Autumn	0
1390	2012-04-30	Morning	0	0	9	0	0	0	Autumn	0
1395	2012-05-01	Morning	0	0	9	0	0	0	Autumn	0
1400	2012-05-02	Morning	0	0	9	0	0	0	Autumn	0
1405	2012-05-03	Morning	0	0	9	0	0	0	Autumn	0
1410	2012-05-04	Morning	0	0	9	0	1.3	-1.3	Autumn	0
1415	2012-05-05	Morning	0	0	9	0	7	-7	Autumn	0
1420	2012-05-06	Morning	21	336	9	37.3333	8.7	28.6333	Autumn	1
1425	2012-05-07	Morning	0	0	9	0	1.3	-1.3	Autumn	0
1430	2012-05-08	Morning	0	0	9	0	0	0	Autumn	0
1435	2012-05-09	Morning	0	0	9	0	0.3	-0.3	Autumn	0
1440	2012-05-10	Morning	17	272	9	30.2222	10.7	19.5222	Autumn	1
1445	2012-05-11	Morning	0	0	9	0	0	0	Autumn	0
1450	2012-05-12	Morning	6	96	9	10.6667	2.3	8.36667	Autumn	1
1455	2012-05-13	Morning	8	128	9	14.2222	7	7.22222	Autumn	1
1460	2012-05-14	Morning	0	0	9	0	12.7	-12.7	Autumn	0
1465	2012-05-15	Morning	4	64	9	7.11111	25.3	-18.1889	Autumn	1
1470	2012-05-16	Morning	17	272	9	30.2222	15.7	14.5222	Autumn	1
1475	2012-05-17	Morning	11	176	9	19.5556	25.7	-6.14444	Autumn	1
1480	2012-05-18	Morning	9	144	9	16	19	-3	Autumn	1
1485	2012-05-19	Morning	7	112	9	12.4444	14.7	-2.25556	Autumn	1
1490	2012-05-20	Morning	22	352	9	39.1111	26.3	12.8111	Autumn	1
1495	2012-05-21	Morning	1	16	8	2	30.3	-28.3	Autumn	1
1500	2012-05-22	Morning	25	400	8	50	60.7	-10.7	Autumn	1
1505	2012-05-23	Morning	9	144	8	18	116.3	-98.3	Autumn	1
1510	2012-05-24	Morning	5	80	1	80	49.7	30.3	Autumn	1
3	2011-07-22	Night	83	1992	25	79.68	89.1	-9.42	Winter	1
8	2011-07-23	Night	165	3960	25	158.4	81.5	76.9	Winter	1
13	2011-07-24	Night	144	3456	25	138.24	112	26.24	Winter	1
18	2011-07-25	Night	96	2304	25	92.16	118	-25.84	Winter	1
23	2011-07-26	Night	70	1680	25	67.2	78.5	-11.3	Winter	1
28	2011-07-27	Night	82	1968	25	78.72	82	-3.28	Winter	1
33	2011-07-28	Night	90	2160	25	86.4	44	42.4	Winter	1
38	2011-07-29	Night	35	840	25	33.6	51.5	-17.9	Winter	1
43	2011-07-30	Night	45	1080	25	43.2	69	-25.8	Winter	1
48	2011-07-31	Night	94	2256	25	90.24	41	49.24	Winter	1
53	2011-08-06	Night	267	4272	25	170.88	71	99.88	Winter	1
58	2011-08-07	Night	79	1264	25	50.56	111.3	-60.74	Winter	1
63	2011-08-08	Night	39	624	25	24.96	37	-12.04	Winter	1
68	2011-08-09	Night	88	1408	24	24	26	-2	Winter	1
73	2011-08-10	Night	44	704	24	29.3333	32	-2.66667	Winter	1
78	2011-08-11	Night	101	1616	24	67.3333	59.3	8.03333	Winter	1
83	2011-08-12	Night	137	2192	23	95.3043	49.7	45.6043	Winter	1
88	2011-08-13	Night	105	1680	23	73.0435	122	-48.9565	Winter	1
93	2011-08-14	Night	34	544	23	23.6522	45.7	-22.0478	Winter	1
98	2011-08-15	Night	60	960	23	41.7391	8	33.7391	Winter	1
103	2011-08-16	Night	82	1312	23	57.0435	45	12.0435	Winter	1
108	2011-08-17	Night	71	1136	23	49.3913	44	5.3913	Winter	1
113	2011-08-18	Night	202	3232	23	140.522	72.7	67.8217	Winter	1
118	2011-08-19	Night	114	1824	23	79.3043	118.7	-39.3957	Winter	1
123	2011-08-20	Night	123	1968	23	85.5652	51.3	34.2652	Winter	1
128	2011-08-21	Night	125	2000	23	86.9565	75.3	11.6565	Winter	1
133	2011-08-22	Night	146	2336	22	106.182	87.3	18.8818	Winter	1
138	2011-08-23	Night	107	1712	23	74.4348	70	4.43478	Winter	1
143	2011-08-24	Night	125	2000	22	90.9091	77.3	13.6091	Winter	1
148	2011-08-25	Night	71	1136	23	49.3913	37	12.3913	Winter	1
153	2011-08-26	Night	85	1360	22	61.8182	80.7	-18.8818	Winter	1
158	2011-08-27	Night	87	1392	22	63.2727	48	15.2727	Winter	1
163	2011-08-28	Night	73	1168	22	53.0909	28	25.0909	Winter	1
168	2011-08-29	Night	86	1376	22	62.5455	41.3	21.2455	Winter	1
173	2011-08-30	Night	45	720	22	32.7273	37.7	-4.97273	Winter	1
178	2011-08-31	Night	119	1904	22	86.5455	42	44.5455	Winter	1
183	2011-09-01	Night	67	1072	22	48.7273	31	17.7273	Spring	1
188	2011-09-02	Night	35	560	21	26.6667	34	-7.33333	Spring	1
193	2011-09-03	Night	35	560	21	26.6667	16	10.6667	Spring	1
198	2011-09-04	Night	29	464	21	22.0952	19	3.09524	Spring	1
203	2011-09-05	Night	97	1552	21	73.9048	22	51.9048	Spring	1
208	2011-09-06	Night	126	2016	21	96	83	13	Spring	1
213	2011-09-07	Night	24	384	21	18.2857	48	-29.7143	Spring	1
218	2011-09-08	Night	40	640	21	30.4762	19.7	10.7762	Spring	1
223	2011-09-09	Night	57	912	20	45.6	38	7.6	Spring	1
228	2011-09-10	Night	35	560	20	28	28.7	-0.7	Spring	1
233	2011-09-11	Night	95	1520	20	76	45	31	Spring	1
238	2011-09-12	Night	113	1808	20	90.4	61	29.4	Spring	1
243	2011-09-13	Night	5	80	20	4	27	-23	Spring	1
248	2011-09-14	Night	56	896	19	47.1579	33.3	13.8579	Spring	1
253	2011-09-15	Night	33	528	20	26.4	23.3	3.1	Spring	1
258	2011-09-16	Night	49	784	20	39.2	21.7	17.5	Spring	1
263	2011-09-17	Night	31	496	20	24.8	11	13.8	Spring	1
268	2011-09-18	Night	62	992	20	49.6	23.3	26.3	Spring	1
273	2011-09-19	Night	160	2560	20	128	35.7	92.3	Spring	1
278	2011-09-20	Night	36	576	20	28.8	62	-33.2	Spring	1
283	2011-09-21	Night	99	1584	20	79.2	40.7	38.5	Spring	1
288	2011-09-22	Night	23	368	19	19.3684	26.7	-7.33158	Spring	1
293	2011-09-23	Night	91	1456	18	80.8889	49	31.8889	Spring	1
298	2011-09-24	Night	45	720	16	45	38	7	Spring	1
303	2011-09-25	Night	35	560	18	31.1111	21.6	9.51111	Spring	1
308	2011-09-26	Night	2	32	18	1.77778	3	-1.22222	Spring	1
313	2011-09-27	Night	0	0	18	0	2.6	-2.6	Spring	0
318	2011-09-28	Night	49	784	18	43.5556	7.3	36.2556	Spring	1
323	2011-09-29	Night	1	16	18	0.888889	23	-22.1111	Spring	1
328	2011-09-30	Night	20	320	18	17.7778	13	4.77778	Spring	1
333	2011-10-01	Night	2	32	18	1.77778	0	1.77778	Spring	1
338	2011-10-02	Night	59	944	18	52.4444	7.3	45.1444	Spring	1
343	2011-10-03	Night	29	464	18	25.7778	21.7	4.07778	Spring	1
348	2011-10-04	Night	22	352	18	19.5556	26	-6.44444	Spring	1
353	2011-10-05	Night	0	0	17	0	8.3	-8.3	Spring	0
358	2011-10-06	Night	0	0	17	0	0.3	-0.3	Spring	0
363	2011-10-07	Night	1	16	34	0.470588	0.3	0.170588	Spring	1
368	2011-10-08	Night	7	112	7	16	1.3	14.7	Spring	1
373	2011-10-09	Night	36	576	17	33.8824	24.7	9.18235	Spring	1
378	2011-10-10	Night	3	48	16	3	6.3	-3.3	Spring	1
383	2011-10-11	Night	0	0	16	0	8	-8	Spring	0
388	2011-10-12	Night	0	0	16	0	1	-1	Spring	0
393	2011-10-13	Night	0	0	16	0	3.7	-3.7	Spring	0
398	2011-10-14	Night	0	0	15	0	3.7	-3.7	Spring	0
403	2011-10-15	Night	1	16	16	1	4.3	-3.3	Spring	1
408	2011-10-16	Night	0	0	16	0	1.3	-1.3	Spring	0
413	2011-10-17	Night	1	16	15	1.06667	0	1.06667	Spring	1
418	2011-10-18	Night	2	32	15	2.13333	1.3	0.833333	Spring	1
423	2011-10-19	Night	4	64	15	4.26667	2.7	1.56667	Spring	1
428	2011-10-20	Night	0	0	15	0	5	-5	Spring	0
433	2011-10-21	Night	1	16	15	1.06667	5.7	-4.63333	Spring	1
438	2011-10-22	Night	38	608	15	40.5333	14.3	26.2333	Spring	1
443	2011-10-23	Night	24	384	15	25.6	24	1.6	Spring	1
448	2011-10-24	Night	48	768	14	54.8571	36	18.8571	Spring	1
453	2011-10-25	Night	107	1712	14	122.286	75.3	46.9857	Spring	1
458	2011-10-26	Night	22	352	14	25.1429	23.7	1.44286	Spring	1
463	2011-10-27	Night	7	112	14	8	25.7	-17.7	Spring	1
468	2011-10-28	Night	19	304	14	21.7143	10.7	11.0143	Spring	1
473	2011-10-29	Night	53	848	14	60.5714	4	56.5714	Spring	1
478	2011-10-30	Night	0	0	13	0	37	-37	Spring	0
483	2011-10-31	Night	3	48	13	3.69231	0.3	3.39231	Spring	1
488	2011-11-01	Night	0	0	13	0	2.7	-2.7	Spring	0
493	2011-11-02	Night	13	208	13	16	0.7	15.3	Spring	1
498	2011-11-03	Night	0	0	13	0	17	-17	Spring	0
503	2011-11-04	Night	7	112	13	8.61538	4.7	3.91538	Spring	1
508	2011-11-05	Night	0	0	12	0	0	0	Spring	0
513	2011-11-06	Night	0	0	12	0	0	0	Spring	0
518	2011-11-07	Night	27	432	12	36	7.3	28.7	Spring	1
523	2011-11-08	Night	12	192	12	16	10.7	5.3	Spring	1
528	2011-11-09	Night	2	32	12	2.66667	1.3	1.36667	Spring	1
533	2011-11-10	Night	0	0	12	0	5.3	-5.3	Spring	0
538	2011-11-11	Night	3	48	12	4	11.3	-7.3	Spring	1
543	2011-11-12	Night	0	0	12	0	3.7	-3.7	Spring	0
548	2011-11-13	Night	45	720	11	65.4545	8.3	57.1545	Spring	1
553	2011-11-14	Night	13	208	11	18.9091	18.7	0.209091	Spring	1
558	2011-11-15	Night	1	16	11	1.45455	3	-1.54545	Spring	1
563	2011-11-16	Night	12	192	11	17.4545	2	15.4545	Spring	1
568	2011-11-17	Night	4	64	11	5.81818	5.7	0.118182	Spring	1
573	2011-11-18	Night	1	16	11	1.45455	4.7	-3.24545	Spring	1
578	2011-11-19	Night	4	64	10	6.4	5.3	1.1	Spring	1
583	2011-11-20	Night	0	0	10	0	0	0	Spring	0
588	2011-11-21	Night	0	0	10	0	0	0	Spring	0
593	2011-11-22	Night	0	0	10	0	0	0	Spring	0
598	2011-11-23	Night	0	0	10	0	0	0	Spring	0
603	2011-11-24	Night	0	0	10	0	0	0	Spring	0
608	2011-11-25	Night	0	0	10	0	0	0	Spring	0
613	2011-11-26	Night	0	0	10	0	0	0	Spring	0
618	2011-11-27	Night	0	0	9	0	0	0	Spring	0
623	2011-11-28	Night	0	0	9	0	0	0	Spring	0
628	2011-11-29	Night	3	48	9	5.33333	1.7	3.63333	Spring	1
633	2011-11-30	Night	22	352	9	39.1111	4.3	34.8111	Spring	1
638	2011-12-01	Night	0	0	8	0	6.3	-6.3	Summer	0
643	2011-12-02	Night	0	0	8	0	0	0	Summer	0
648	2011-12-03	Night	0	0	8	0	0	0	Summer	0
653	2011-12-04	Night	0	0	8	0	0	0	Summer	0
658	2011-12-05	Night	0	0	8	0	0	0	Summer	0
663	2011-12-06	Night	0	0	8	0	0	0	Summer	0
668	2011-12-07	Night	0	0	8	0	0	0	Summer	0
673	2011-12-08	Night	0	0	8	0	0	0	Summer	0
678	2011-12-09	Night	0	0	8	0	0	0	Summer	0
683	2011-12-10	Night	0	0	8	0	0	0	Summer	0
688	2011-12-11	Night	0	0	8	0	0	0	Summer	0
693	2011-12-12	Night	0	0	8	0	0	0	Summer	0
698	2011-12-13	Night	0	0	8	0	0	0	Summer	0
703	2011-12-14	Night	0	0	8	0	0	0	Summer	0
708	2011-12-15	Night	0	0	8	0	0	0	Summer	0
713	2011-12-16	Night	0	0	8	0	0	0	Summer	0
718	2011-12-17	Night	0	0	8	0	0	0	Summer	0
723	2011-12-18	Night	0	0	8	0	0	0	Summer	0
728	2011-12-19	Night	0	0	8	0	0	0	Summer	0
733	2011-12-20	Night	0	0	8	0	0	0	Summer	0
738	2011-12-21	Night	0	0	7	0	0	0	Summer	0
743	2011-12-22	Night	0	0	7	0	0	0	Summer	0
748	2011-12-23	Night	11	176	7	25.1429	0	25.1429	Summer	1
753	2011-12-24	Night	0	0	7	0	1.7	-1.7	Summer	0
758	2011-12-25	Night	0	0	7	0	0	0	Summer	0
763	2011-12-26	Night	0	0	7	0	0	0	Summer	0
768	2011-12-27	Night	0	0	7	0	0	0	Summer	0
773	2011-12-28	Night	0	0	7	0	0	0	Summer	0
778	2011-12-29	Night	0	0	7	0	0	0	Summer	0
783	2011-12-30	Night	0	0	8	0	0	0	Summer	0
788	2011-12-31	Night	0	0	7	0	0	0	Summer	0
793	2012-01-01	Night	0	0	7	0	0	0	Summer	0
798	2012-01-02	Night	0	0	8	0	0	0	Summer	0
803	2012-01-03	Night	0	0	8	0	0	0	Summer	0
808	2012-01-04	Night	0	0	7	0	0	0	Summer	0
813	2012-01-05	Night	0	0	9	0	0	0	Summer	0
818	2012-01-06	Night	0	0	8	0	0	0	Summer	0
823	2012-01-07	Night	0	0	9	0	0	0	Summer	0
828	2012-01-08	Night	0	0	9	0	0	0	Summer	0
833	2012-01-09	Night	0	0	9	0	0	0	Summer	0
838	2012-01-10	Night	0	0	9	0	0	0	Summer	0
843	2012-01-11	Night	0	0	9	0	0	0	Summer	0
848	2012-01-12	Night	0	0	9	0	0	0	Summer	0
853	2012-01-13	Night	0	0	9	0	0	0	Summer	0
858	2012-01-14	Night	0	0	9	0	0	0	Summer	0
863	2012-01-15	Night	0	0	9	0	0	0	Summer	0
868	2012-01-16	Night	0	0	9	0	0	0	Summer	0
873	2012-01-17	Night	0	0	9	0	0	0	Summer	0
878	2012-01-18	Night	0	0	9	0	0	0	Summer	0
883	2012-01-19	Night	0	0	10	0	0	0	Summer	0
888	2012-01-20	Night	0	0	10	0	0	0	Summer	0
893	2012-01-21	Night	0	0	10	0	0	0	Summer	0
898	2012-01-22	Night	0	0	10	0	0	0	Summer	0
903	2012-01-23	Night	0	0	10	0	0	0	Summer	0
908	2012-01-24	Night	0	0	11	0	0	0	Summer	0
913	2012-01-25	Night	0	0	11	0	0	0	Summer	0
918	2012-01-26	Night	0	0	11	0	0	0	Summer	0
923	2012-01-27	Night	0	0	11	0	0	0	Summer	0
928	2012-01-28	Night	0	0	11	0	0	0	Summer	0
933	2012-01-29	Night	0	0	11	0	0	0	Summer	0
938	2012-01-30	Night	0	0	11	0	0	0	Summer	0
943	2012-01-31	Night	0	0	12	0	0	0	Summer	0
948	2012-02-01	Night	0	0	12	0	0	0	Summer	0
953	2012-02-02	Night	0	0	12	0	0	0	Summer	0
958	2012-02-03	Night	0	0	12	0	0	0	Summer	0
963	2012-02-04	Night	0	0	12	0	0	0	Summer	0
968	2012-02-05	Night	0	0	12	0	0	0	Summer	0
973	2012-02-06	Night	0	0	12	0	0	0	Summer	0
978	2012-02-07	Night	0	0	12	0	0	0	Summer	0
983	2012-02-08	Night	0	0	12	0	0	0	Summer	0
988	2012-02-09	Night	0	0	13	0	0	0	Summer	0
993	2012-02-10	Night	0	0	13	0	0	0	Summer	0
998	2012-02-11	Night	0	0	13	0	0	0	Summer	0
1003	2012-02-12	Night	0	0	13	0	0	0	Summer	0
1008	2012-02-13	Night	0	0	14	0	0	0	Summer	0
1013	2012-02-14	Night	0	0	13	0	0	0	Summer	0
1018	2012-02-15	Night	0	0	14	0	0	0	Summer	0
1023	2012-02-16	Night	0	0	14	0	0	0	Summer	0
1028	2012-02-17	Night	0	0	14	0	0	0	Summer	0
1033	2012-02-18	Night	0	0	14	0	0	0	Summer	0
1038	2012-02-19	Night	0	0	15	0	0	0	Summer	0
1043	2012-02-20	Night	0	0	15	0	0	0	Summer	0
1048	2012-02-21	Night	0	0	15	0	0	0	Summer	0
1053	2012-02-22	Night	0	0	15	0	0	0	Summer	0
1058	2012-02-23	Night	0	0	15	0	0	0	Summer	0
1063	2012-02-24	Night	0	0	15	0	0	0	Summer	0
1068	2012-02-25	Night	0	0	15	0	0	0	Summer	0
1073	2012-02-26	Night	0	0	16	0	0	0	Summer	0
1078	2012-02-27	Night	0	0	16	0	0	0	Summer	0
1083	2012-02-28	Night	0	0	16	0	0	0	Summer	0
1088	2012-02-29	Night	0	0	5	0	0	0	Summer	0
1093	2012-03-01	Night	0	0	11	0	0	0	Autumn	0
1098	2012-03-02	Night	0	0	16	0	0	0	Autumn	0
1103	2012-03-03	Night	0	0	17	0	0	0	Autumn	0
1108	2012-03-04	Night	0	0	17	0	0	0	Autumn	0
1113	2012-03-05	Night	0	0	17	0	0	0	Autumn	0
1118	2012-03-06	Night	0	0	17	0	0	0	Autumn	0
1123	2012-03-07	Night	0	0	17	0	0	0	Autumn	0
1128	2012-03-08	Night	0	0	17	0	0	0	Autumn	0
1133	2012-03-09	Night	0	0	17	0	0	0	Autumn	0
1138	2012-03-10	Night	0	0	17	0	0	0	Autumn	0
1143	2012-03-11	Night	0	0	17	0	0	0	Autumn	0
1148	2012-03-12	Night	0	0	18	0	0	0	Autumn	0
1153	2012-03-13	Night	0	0	18	0	0	0	Autumn	0
1158	2012-03-14	Night	0	0	18	0	0	0	Autumn	0
1163	2012-03-15	Night	0	0	19	0	0	0	Autumn	0
1168	2012-03-16	Night	0	0	19	0	0	0	Autumn	0
1173	2012-03-17	Night	0	0	19	0	0	0	Autumn	0
1178	2012-03-18	Night	0	0	19	0	0	0	Autumn	0
1183	2012-03-19	Night	0	0	19	0	0	0	Autumn	0
1188	2012-03-20	Night	0	0	19	0	6.3	-6.3	Autumn	0
1193	2012-03-21	Night	0	0	19	0	0	0	Autumn	0
1198	2012-03-22	Night	0	0	19	0	0	0	Autumn	0
1203	2012-03-23	Night	0	0	19	0	0	0	Autumn	0
1208	2012-03-24	Night	0	0	19	0	0	0	Autumn	0
1213	2012-03-25	Night	0	0	19	0	0	0	Autumn	0
1218	2012-03-26	Night	0	0	19	0	0	0	Autumn	0
1223	2012-03-27	Night	0	0	19	0	0	0	Autumn	0
1228	2012-03-28	Night	0	0	20	0	0	0	Autumn	0
1233	2012-03-29	Night	0	0	20	0	0	0	Autumn	0
1238	2012-03-30	Night	0	0	21	0	0	0	Autumn	0
1243	2012-03-31	Night	0	0	21	0	0	0	Autumn	0
1248	2012-04-01	Night	0	0	21	0	0	0	Autumn	0
1253	2012-04-02	Night	0	0	21	0	0	0	Autumn	0
1258	2012-04-03	Night	0	0	21	0	0	0	Autumn	0
1263	2012-04-04	Night	0	0	21	0	0	0	Autumn	0
1268	2012-04-05	Night	0	0	21	0	0	0	Autumn	0
1273	2012-04-06	Night	0	0	21	0	0	0	Autumn	0
1278	2012-04-07	Night	0	0	21	0	0	0	Autumn	0
1283	2012-04-08	Night	0	0	21	0	0	0	Autumn	0
1288	2012-04-09	Night	0	0	21	0	0	0	Autumn	0
1293	2012-04-10	Night	0	0	21	0	0	0	Autumn	0
1298	2012-04-11	Night	0	0	22	0	0	0	Autumn	0
1303	2012-04-12	Night	0	0	22	0	0	0	Autumn	0
1308	2012-04-13	Night	0	0	22	0	0	0	Autumn	0
1313	2012-04-14	Night	19	304	22	13.8182	0	13.8182	Autumn	1
1318	2012-04-15	Night	0	0	22	0	7	-7	Autumn	0
1323	2012-04-16	Night	0	0	22	0	0	0	Autumn	0
1328	2012-04-17	Night	0	0	22	0	0	0	Autumn	0
1333	2012-04-18	Night	0	0	23	0	0	0	Autumn	0
1338	2012-04-19	Night	0	0	23	0	0	0	Autumn	0
1343	2012-04-20	Night	0	0	23	0	0	0	Autumn	0
1348	2012-04-21	Night	0	0	23	0	0	0	Autumn	0
1353	2012-04-22	Night	0	0	23	0	0.3	-0.3	Autumn	0
1358	2012-04-23	Night	0	0	23	0	0	0	Autumn	0
1363	2012-04-24	Night	0	0	23	0	1	-1	Autumn	0
1368	2012-04-25	Night	0	0	22	0	0	0	Autumn	0
1373	2012-04-26	Night	0	0	22	0	0	0	Autumn	0
1378	2012-04-27	Night	0	0	24	0	0	0	Autumn	0
1383	2012-04-28	Night	0	0	23	0	0	0	Autumn	0
1388	2012-04-29	Night	0	0	24	0	0	0	Autumn	0
1393	2012-04-30	Night	0	0	24	0	0	0	Autumn	0
1398	2012-05-01	Night	0	0	24	0	0	0	Autumn	0
1403	2012-05-02	Night	0	0	24	0	0	0	Autumn	0
1408	2012-05-03	Night	0	0	24	0	0	0	Autumn	0
1413	2012-05-04	Night	17	272	24	11.3333	1.3	10.0333	Autumn	1
1418	2012-05-05	Night	9	144	24	6	7	-1	Autumn	1
1423	2012-05-06	Night	4	64	24	2.66667	8.7	-6.03333	Autumn	1
1428	2012-05-07	Night	0	0	24	0	1.3	-1.3	Autumn	0
1433	2012-05-08	Night	0	0	24	0	0	0	Autumn	0
1438	2012-05-09	Night	6	96	24	4	0.3	3.7	Autumn	1
1443	2012-05-10	Night	0	0	24	0	10.7	-10.7	Autumn	0
1448	2012-05-11	Night	0	0	25	0	0	0	Autumn	0
1453	2012-05-12	Night	13	208	25	8.32	2.3	6.02	Autumn	1
1458	2012-05-13	Night	0	0	25	0	7	-7	Autumn	0
1463	2012-05-14	Night	59	944	25	37.76	12.7	25.06	Autumn	1
1468	2012-05-15	Night	51	816	25	32.64	25.3	7.34	Autumn	1
1473	2012-05-16	Night	6	96	17	5.64706	15.7	-10.0529	Autumn	1
1478	2012-05-17	Night	36	576	25	23.04	25.7	-2.66	Autumn	1
1483	2012-05-18	Night	38	608	26	23.3846	19	4.38462	Autumn	1
1488	2012-05-19	Night	36	576	26	22.1538	14.7	7.45385	Autumn	1
1493	2012-05-20	Night	25	400	26	15.3846	26.3	-10.9154	Autumn	1
1498	2012-05-21	Night	108	1728	25	69.12	30.3	38.82	Autumn	1
1503	2012-05-22	Night	227	3632	26	139.692	60.7	78.9923	Autumn	1
1508	2012-05-23	Night	170	2720	26	104.615	116.3	-11.6846	Autumn	1

## Sheet: Diel hours
										Calls
NoOfCalls	CallsPerHr	MeanCallsFor24hPeriod	MeanAdjustedCallRate	Time		Hour	Mean per hr	SD	SE	Mean adjusted	SD	SE
7	168	148.667	19.3333	00:00		00:00:00	57.1429	155.011	6.31778	17.0939	169.172	6.89495
21	504	20.3333	483.667	00:00		01:00:00	49.4618	124.845	5.08829	9.41288	140.73	5.73572
9	216	0	216	00:00		02:00:00	43.56	108.401	4.42546	3.37759	128.195	5.23353
17	408	0	408	00:00		03:00:00	42.1262	117.57	4.79179	2.07734	135.863	5.53738
5	120	0	120	00:00		04:00:00	39.8272	112.497	4.58505	-0.221667	128.304	5.22928
5	120	66.3333	53.6667	00:00		05:00:00	34.3256	90.9932	3.70861	-5.72333	111.088	4.52762
19	456	257.333	198.667	00:00		06:00:00	34.1927	100.561	4.09858	-5.85622	116.775	4.75938
5	120	52	68	00:00		07:00:00	35.8538	99.9638	4.07422	-4.19509	120.629	4.91648
1	24	13.3333	10.6667	00:00		08:00:00	28.2126	79.0466	3.2217	-11.8363	102.721	4.1866
17	408	0	408	00:00		09:00:00	31.3744	91.154	3.71825	-8.68512	113.729	4.6391
82	1312	0	1312	0:00		10:00:00	30.9467	83.9611	3.422	-9.12346	107.42	4.38539
0	0	5.33333	-5.33333	0:00		11:00:00	27.6995	81.7932	3.34198	-12.4375	106.434	4.34878
3	48	186	-138	0:00		12:00:00	32.0401	90.2065	3.68882	-8.164	114.08	4.66506
2	32	16	16	0:00		13:00:00	31.1052	90.8139	3.71056	-9.56861	113.619	4.64235
0	0	26	-26	0:00		14:00:00	34.7022	97.6723	3.98414	-6.37125	117.892	4.80893
84	1344	0	1344	0:00		15:00:00	33.3821	96.5883	3.93665	-7.62313	119.737	4.88012
34	544	0	544	0:00		16:00:00	37.4618	105.137	4.28507	-3.54339	124.778	5.08556
8	128	3.66667	124.333	0:00		17:00:00	38.8837	98.4276	4.01161	-2.12147	122.438	4.99851
16	256	0	256	0:00		18:00:00	49.4884	127.099	5.18016	8.48319	146.554	5.97308
27	432	138.333	293.667	0:00		19:00:00	58.4319	150.864	6.14878	17.4267	166.864	6.80087
7	112	12.6667	99.3333	0:00		20:00:00	57.0233	134.966	5.50079	16.0181	152.644	6.22132
12	192	0.333333	191.667	0:00		21:00:00	55.2957	135.26	5.51279	14.2905	151.578	6.17784
35	560	0	560	0:00		22:00:00	60.4651	147.643	6.01747	19.4599	162.565	6.62567
23	368	3	365	0:00		23:00:00	51.814	133.247	5.43074	10.8592	150.95	6.15228
33	528	58.1667	469.833	0:00
28	448	179.333	268.667	0:00
6	96	41.3333	54.6667	0:00
11	176	6.66667	169.333	0:00
5	80	0	80	0:00
5	80	0	80	0:00
7	112	18	94	0:00
15	240	187.333	52.6667	0:00
4	64	52.3333	11.6667	0:00
18	288	3.33333	284.667	0:00
38	608	0	608	0:00
5	80	0	80	0:00
19	304	0	304	0:00
1	16	179.5	-163.5	0:00
0	0	48	-48	0:00
1	16	0	16	0:00
20	320	0	320	0:00
2	32	0	32	0:00
10	160	0	160	0:00
7	112	126.5	-14.5	0:00
0	0	97	-97	0:00
20	320	0	320	0:00
1	16	0	16	0:00
10	160	0	160	0:00
3	48	0	48	0:00
0	0	51.3333	-51.3333	0:00
0	0	196.5	-196.5	0:00
3	48	33	15	0:00
2	32	1.66667	30.3333	0:00
20	320	0	320	0:00
14	224	0	224	0:00
0	0	5.66667	-5.66667	0:00
4	64	160.667	-96.6667	0:00
10	160	41.3333	118.667	0:00
36	576	6	570	0:00
2	32	0	32	0:00
0	0	0	0	0:00
0	0	0.653061	-0.653061	0:00
0	0	143.333	-143.333	0:00
0	0	97.3333	-97.3333	0:00
0	0	15	-15	0:00
0	0	0	0	0:00
0	0	0	0	0:00
13	208	0	208	0:00
3	48	73.5	-25.5	0:00
0	0	97.3333	-97.3333	0:00
0	0	10	-10	0:00
0	0	10	-10	0:00
0	0	0	0	0:00
6	96	5.66667	90.3333	0:00
5	80	22.3333	57.6667	0:00
0	0	153.167	-153.167	0:00
0	0	14.3333	-14.3333	0:00
0	0	2.66667	-2.66667	0:00
0	0	0	0	0:00
0	0	0	0	0:00
0	0	2.33333	-2.33333	0:00
0	0	167.333	-167.333	0:00
0	0	50.6667	-50.6667	0:00
7	112	4	108	0:00
0	0	0	0	0:00
0	0	0	0	0:00
0	0	0	0	0:00
0	0	126.333	-126.333	0:00
1	16	72	-56	0:00
7	112	17.6667	94.3333	0:00
4	64	0	64	0:00
0	0	0	0	0:00
4	64	0	64	0:00
3	48	95.3333	-47.3333	0:00
10	160	130.667	29.3333	0:00
0	0	15	-15	0:00
1	16	1	15	0:00
0	0	0	0	0:00
0	0	0	0	0:00
0	0	12.6667	-12.6667	0:00
0	0	123.5	-123.5	0:00
0	0	42	-42	0:00
0	0	2.66667	-2.66667	0:00
9	144	2.66667	141.333	0:00
0	0	0	0	0:00
3	48	0	48	0:00
0	0	120	-120	0:00
0	0	33.6667	-33.6667	0:00
0	0	14.6667	-14.6667	0:00
0	0	0	0	0:00
0	0	0	0	0:00
1	16	0	16	0:00
0	0	84.8333	-84.8333	0:00
0	0	83	-83	0:00
0	0	17.6667	-17.6667	0:00
0	0	0	0	0:00
0	0	0	0	0:00
0	0	0	0	0:00
0	0	41	-41	0:00
0	0	137	-137	0:00
0	0	25.6667	-25.6667	0:00
0	0	1.66667	-1.66667	0:00
0	0	0	0	0:00
0	0	0	0	0:00
0	0	9	-9	0:00
0	0	148.667	-148.667	0:00
0	0	42.6667	-42.6667	0:00
0	0	4.33333	-4.33333	0:00
0	0	0	0	0:00
0	0	0	0	0:00
0	0	0	0	0:00
0	0	118.5	-118.5	0:00
0	0	57.6667	-57.6667	0:00
0	0	15	-15	0:00
0	0	0	0	0:00
0	0	0	0	0:00
0	0	0	0	0:00
0	0	79.3333	-79.3333	0:00
0	0	107.667	-107.667	0:00
0	0	5.66667	-5.66667	0:00
0	0	0	0	0:00
0	0	0	0	0:00
0	0	0	0	0:00
0	0	38	-38	0:00
0	0	96.6667	-96.6667	0:00
0	0	21.2245	-21.2245	0:00
0	0	1	-1	0:00
0	0	0	0	0:00
0	0	0.666667	-0.666667	0:00
0	0	3	-3	0:00
0	0	137.167	-137.167	0:00
0	0	30.3333	-30.3333	0:00
0	0	3.33333	-3.33333	0:00
0	0	0	0	0:00
0	0	0	0	0:00
0	0	5.33333	-5.33333	0:00
0	0	136.667	-136.667	0:00
0	0	47.6667	-47.6667	0:00
0	0	3.66667	-3.66667	0:00
0	0	0	0	0:00
0	0	0	0	0:00
0	0	0	0	0:00
0	0	129.167	-129.167	0:00
0	0	75.6667	-75.6667	0:00
0	0	12	-12	0:00
0	0	0	0	0:00
0	0	0	0	0:00
0	0	0	0	0:00
0	0	45.6667	-45.6667	0:00
0	0	141.667	-141.667	0:00
0	0	13.6667	-13.6667	0:00
0	0	0	0	0:00
0	0	0	0	0:00
0	0	0	0	0:00
0	0	10.3333	-10.3333	0:00
0	0	182.667	-182.667	0:00
0	0	31.3333	-31.3333	0:00
0	0	0	0	0:00
0	0	0	0	0:00
0	0	0	0	0:00
0	0	0.326531	-0.326531	0:00
0	0	151.5	-151.5	0:00
0	0	48.6667	-48.6667	0:00
0	0	3	-3	0:00
0	0	0	0	0:00
0	0	0	0	0:00
0	0	0	0	0:00
0	0	86.6667	-86.6667	0:00
0	0	88.3333	-88.3333	0:00
0	0	13	-13	0:00
0	0	0	0	0:00
0	0	0	0	0:00
0	0	0	0	0:00
0	0	36.6667	-36.6667	0:00
0	0	147.333	-147.333	0:00
0	0	34.6667	-34.6667	0:00
0	0	0	0	0:00
0	0	0	0	0:00
0	0	0	0	0:00
0	0	24	-24	0:00
0	0	183.833	-183.833	0:00
0	0	34.6667	-34.6667	0:00
0	0	1	-1	0:00
0	0	0	0	0:00
0	0	0.666667	-0.666667	0:00
0	0	0	0	0:00
0	0	164	-164	0:00
0	0	73.3333	-73.3333	0:00
0	0	2.66667	-2.66667	0:00
0	0	0	0	0:00
0	0	0	0	0:00
0	0	3.66667	-3.66667	0:00
0	0	80	-80	0:00
0	0	139.667	-139.667	0:00
0	0	8.66667	-8.66667	0:00
0	0	0	0	0:00
0	0	0	0	0:00
0	0	4.33333	-4.33333	0:00
0	0	57	-57	0:00
0	0	161.667	-161.667	0:00
0	0	31	-31	0:00
0	0	1.66667	-1.66667	0:00
0	0	0	0	0:00
0	0	0	0	0:00
0	0	0.333333	-0.333333	0:00
0	0	181	-181	0:00
0	0	48.3333	-48.3333	0:00
0	0	7.66667	-7.66667	0:00
0	0	0	0	0:00
0	0	0	0	0:00
0	0	0.333333	-0.333333	0:00
0	0	223.333	-223.333	0:00
0	0	127	-127	0:00
0	0	11.6667	-11.6667	0:00
0	0	0.666667	-0.666667	0:00
0	0	0	0	0:00
0	0	0	0	0:00
0	0	102.333	-102.333	0:00
0	0	233.333	-233.333	0:00
0	0	36.3333	-36.3333	0:00
0	0	3.66667	-3.66667	0:00
0	0	0	0	0:00
0	0	0	0	0:00
0	0	26.3333	-26.3333	0:00
0	0	310.833	-310.833	0:00
0	0	27	-27	0:00
0	0	3.33333	-3.33333	0:00
0	0	0	0	0:00
0	0	0	0	0:00
0	0	0	0	0:00
0	0	266.167	-266.167	0:00
0	0	96.6667	-96.6667	0:00
0	0	6.33333	-6.33333	0:00
0	0	0	0	0:00
0	0	0	0	0:00
0	0	0	0	0:00
0	0	167.667	-167.667	0:00
0	0	158.667	-158.667	0:00
0	0	24	-24	0:00
0	0	0	0	0:00
0	0	0	0	0:00
0	0	0	0	0:00
0	0	72.5	-72.5	0:00
0	0	233.667	-233.667	0:00
0	0	28	-28	0:00
0	0	7.33333	-7.33333	0:00
0	0	0	0	0:00
0	0	0	0	0:00
0	0	10	-10	0:00
0	0	241	-241	0:00
0	0	95.6667	-95.6667	0:00
0	0	7.33333	-7.33333	0:00
0	0	0	0	0:00
0	0	0	0	0:00
0	0	0	0	0:00
0	0	217.833	-217.833	0:00
0	0	135.667	-135.667	0:00
0	0	11	-11	0:00
0	0	0	0	0:00
0	0	0	0	0:00
0	0	0	0	0:00
3	48	154.167	-106.167	0:00
0	0	221	-221	0:00
0	0	7.66667	-7.66667	0:00
0	0	0.333333	-0.333333	0:00
0	0	0	0	0:00
4	64	0	64	0:00
0	0	75.6667	-75.6667	0:00
0	0	200.667	-200.667	0:00
0	0	42.3333	-42.3333	0:00
0	0	8	-8	0:00
4	64	0	64	0:00
0	0	0	0	0:00
0	0	0.333333	-0.333333	0:00
1	16	251.167	-235.167	0:00
3	48	78.3333	-30.3333	0:00
0	0	7.66667	-7.66667	0:00
4	64	0	64	0:00
22	352	0	352	0:00
3	48	0	48	0:00
2	32	33.6842	-1.68421	0:00
12	288	148.667	139.333	00:30
23	552	20.3333	531.667	00:30
16	384	0	384	00:30
0	0	0	0	00:30
11	264	0	264	00:30
4	96	66.3333	29.6667	00:30
28	672	257.333	414.667	00:30
8	192	52	140	00:30
2	48	13.3333	34.6667	00:30
2	48	0	48	00:30
33	528	0	528	0:30
13	208	5.33333	202.667	0:30
27	432	186	246	0:30
2	32	16	16	0:30
0	0	26	-26	0:30
61	976	0	976	0:30
12	192	0	192	0:30
23	368	3.66667	364.333	0:30
3	48	0	48	0:30
16	256	138.333	117.667	0:30
15	240	12.6667	227.333	0:30
19	304	0.333333	303.667	0:30
64	1024	0	1024	0:30
16	256	3	253	0:30
54	864	58.1667	805.833	0:30
23	368	179.333	188.667	0:30
1	16	41.3333	-25.3333	0:30
1	16	6.66667	9.33333	0:30
4	64	0	64	0:30
18	288	0	288	0:30
1	16	18	-2	0:30
11	176	187.333	-11.3333	0:30
17	272	52.3333	219.667	0:30
38	608	3.33333	604.667	0:30
30	480	0	480	0:30
4	64	0	64	0:30
5	80	0	80	0:30
1	16	179.5	-163.5	0:30
7	112	48	64	0:30
0	0	0	0	0:30
30	480	0	480	0:30
25	400	0	400	0:30
21	336	0	336	0:30
2	32	126.5	-94.5	0:30
1	16	97	-81	0:30
25	400	0	400	0:30
20	320	0	320	0:30
26	416	0	416	0:30
0	0	0	0	0:30
0	0	51.3333	-51.3333	0:30
0	0	196.5	-196.5	0:30
5	80	33	47	0:30
23	368	1.66667	366.333	0:30
15	240	0	240	0:30
54	864	0	864	0:30
0	0	5.66667	-5.66667	0:30
25	400	160.667	239.333	0:30
0	0	41.3333	-41.3333	0:30
25	400	6	394	0:30
0	0	0	0	0:30
4	64	0	64	0:30
0	0	0.653061	-0.653061	0:30
0	0	143.333	-143.333	0:30
23	368	97.3333	270.667	0:30
0	0	15	-15	0:30
0	0	0	0	0:30
0	0	0	0	0:30
1	16	0	16	0:30
3	48	73.5	-25.5	0:30
5	80	97.3333	-17.3333	0:30
0	0	10	-10	0:30
0	0	10	-10	0:30
0	0	0	0	0:30
0	0	5.66667	-5.66667	0:30
8	128	22.3333	105.667	0:30
0	0	153.167	-153.167	0:30
0	0	14.3333	-14.3333	0:30
0	0	2.66667	-2.66667	0:30
0	0	0	0	0:30
0	0	0	0	0:30
0	0	2.33333	-2.33333	0:30
0	0	167.333	-167.333	0:30
0	0	50.6667	-50.6667	0:30
9	144	4	140	0:30
0	0	0	0	0:30
0	0	0	0	0:30
0	0	0	0	0:30
25	400	126.333	273.667	0:30
6	96	72	24	0:30
1	16	17.6667	-1.66667	0:30
6	96	0	96	0:30
3	48	0	48	0:30
0	0	0	0	0:30
6	96	95.3333	0.666667	0:30
0	0	130.667	-130.667	0:30
0	0	15	-15	0:30
6	96	1	95	0:30
0	0	0	0	0:30
0	0	0	0	0:30
0	0	12.6667	-12.6667	0:30
0	0	123.5	-123.5	0:30
0	0	42	-42	0:30
0	0	2.66667	-2.66667	0:30
0	0	2.66667	-2.66667	0:30
0	0	0	0	0:30
0	0	0	0	0:30
0	0	120	-120	0:30
3	48	33.6667	14.3333	0:30
0	0	14.6667	-14.6667	0:30
23	368	0	368	0:30
0	0	0	0	0:30
0	0	0	0	0:30
0	0	84.8333	-84.8333	0:30
0	0	83	-83	0:30
0	0	17.6667	-17.6667	0:30
0	0	0	0	0:30
0	0	0	0	0:30
0	0	0	0	0:30
0	0	41	-41	0:30
0	0	137	-137	0:30
0	0	25.6667	-25.6667	0:30
0	0	1.66667	-1.66667	0:30
0	0	0	0	0:30
0	0	0	0	0:30
0	0	9	-9	0:30
0	0	148.667	-148.667	0:30
8	128	42.6667	85.3333	0:30
0	0	4.33333	-4.33333	0:30
0	0	0	0	0:30
0	0	0	0	0:30
0	0	0	0	0:30
0	0	118.5	-118.5	0:30
0	0	57.6667	-57.6667	0:30
0	0	15	-15	0:30
0	0	0	0	0:30
0	0	0	0	0:30
0	0	0	0	0:30
0	0	79.3333	-79.3333	0:30
0	0	107.667	-107.667	0:30
0	0	5.66667	-5.66667	0:30
0	0	0	0	0:30
0	0	0	0	0:30
0	0	0	0	0:30
0	0	38	-38	0:30
0	0	96.6667	-96.6667	0:30
0	0	21.2245	-21.2245	0:30
0	0	1	-1	0:30
0	0	0	0	0:30
0	0	0.666667	-0.666667	0:30
6	96	3	93	0:30
0	0	137.167	-137.167	0:30
0	0	30.3333	-30.3333	0:30
0	0	3.33333	-3.33333	0:30
0	0	0	0	0:30
0	0	0	0	0:30
0	0	5.33333	-5.33333	0:30
0	0	136.667	-136.667	0:30
0	0	47.6667	-47.6667	0:30
0	0	3.66667	-3.66667	0:30
0	0	0	0	0:30
0	0	0	0	0:30
0	0	0	0	0:30
0	0	129.167	-129.167	0:30
0	0	75.6667	-75.6667	0:30
0	0	12	-12	0:30
0	0	0	0	0:30
0	0	0	0	0:30
0	0	0	0	0:30
0	0	45.6667	-45.6667	0:30
0	0	141.667	-141.667	0:30
0	0	13.6667	-13.6667	0:30
0	0	0	0	0:30
0	0	0	0	0:30
0	0	0	0	0:30
0	0	10.3333	-10.3333	0:30
0	0	182.667	-182.667	0:30
0	0	31.3333	-31.3333	0:30
0	0	0	0	0:30
0	0	0	0	0:30
0	0	0	0	0:30
0	0	0.326531	-0.326531	0:30
0	0	151.5	-151.5	0:30
0	0	48.6667	-48.6667	0:30
0	0	3	-3	0:30
0	0	0	0	0:30
0	0	0	0	0:30
0	0	0	0	0:30
0	0	86.6667	-86.6667	0:30
0	0	88.3333	-88.3333	0:30
0	0	13	-13	0:30
0	0	0	0	0:30
0	0	0	0	0:30
0	0	0	0	0:30
0	0	36.6667	-36.6667	0:30
0	0	147.333	-147.333	0:30
0	0	34.6667	-34.6667	0:30
0	0	0	0	0:30
0	0	0	0	0:30
0	0	0	0	0:30
0	0	24	-24	0:30
0	0	183.833	-183.833	0:30
0	0	34.6667	-34.6667	0:30
0	0	1	-1	0:30
0	0	0	0	0:30
0	0	0.666667	-0.666667	0:30
0	0	0	0	0:30
0	0	164	-164	0:30
0	0	73.3333	-73.3333	0:30
0	0	2.66667	-2.66667	0:30
0	0	0	0	0:30
0	0	0	0	0:30
0	0	3.66667	-3.66667	0:30
0	0	80	-80	0:30
0	0	139.667	-139.667	0:30
0	0	8.66667	-8.66667	0:30
0	0	0	0	0:30
0	0	0	0	0:30
0	0	4.33333	-4.33333	0:30
0	0	57	-57	0:30
0	0	161.667	-161.667	0:30
0	0	31	-31	0:30
0	0	1.66667	-1.66667	0:30
0	0	0	0	0:30
0	0	0	0	0:30
0	0	0.333333	-0.333333	0:30
0	0	181	-181	0:30
0	0	48.3333	-48.3333	0:30
0	0	7.66667	-7.66667	0:30
0	0	0	0	0:30
0	0	0	0	0:30
0	0	0.333333	-0.333333	0:30
0	0	223.333	-223.333	0:30
0	0	127	-127	0:30
0	0	11.6667	-11.6667	0:30
0	0	0.666667	-0.666667	0:30
0	0	0	0	0:30
0	0	0	0	0:30
0	0	102.333	-102.333	0:30
0	0	233.333	-233.333	0:30
0	0	36.3333	-36.3333	0:30
0	0	3.66667	-3.66667	0:30
0	0	0	0	0:30
0	0	0	0	0:30
0	0	26.3333	-26.3333	0:30
0	0	310.833	-310.833	0:30
0	0	27	-27	0:30
0	0	3.33333	-3.33333	0:30
0	0	0	0	0:30
0	0	0	0	0:30
0	0	0	0	0:30
0	0	266.167	-266.167	0:30
0	0	96.6667	-96.6667	0:30
0	0	6.33333	-6.33333	0:30
0	0	0	0	0:30
0	0	0	0	0:30
0	0	0	0	0:30
0	0	167.667	-167.667	0:30
0	0	158.667	-158.667	0:30
0	0	24	-24	0:30
0	0	0	0	0:30
0	0	0	0	0:30
2	32	0	32	0:30
0	0	72.5	-72.5	0:30
0	0	233.667	-233.667	0:30
0	0	28	-28	0:30
0	0	7.33333	-7.33333	0:30
0	0	0	0	0:30
0	0	0	0	0:30
0	0	10	-10	0:30
0	0	241	-241	0:30
0	0	95.6667	-95.6667	0:30
0	0	7.33333	-7.33333	0:30
0	0	0	0	0:30
0	0	0	0	0:30
0	0	0	0	0:30
0	0	217.833	-217.833	0:30
0	0	135.667	-135.667	0:30
0	0	11	-11	0:30
0	0	0	0	0:30
0	0	0	0	0:30
0	0	0	0	0:30
4	64	154.167	-90.1667	0:30
0	0	221	-221	0:30
0	0	7.66667	-7.66667	0:30
0	0	0.333333	-0.333333	0:30
0	0	0	0	0:30
9	144	0	144	0:30
0	0	75.6667	-75.6667	0:30
0	0	200.667	-200.667	0:30
1	16	42.3333	-26.3333	0:30
0	0	8	-8	0:30
0	0	0	0	0:30
0	0	0	0	0:30
0	0	0.333333	-0.333333	0:30
0	0	251.167	-251.167	0:30
1	16	78.3333	-62.3333	0:30
10	160	7.66667	152.333	0:30
1	16	0	16	0:30
11	176	0	176	0:30
14	224	0	224	0:30
1	16	33.6842	-17.6842	0:30
8	192	148.667	43.3333	01:00
26	624	20.3333	603.667	01:00
17	408	0	408	01:00
3	72	0	72	01:00
10	240	0	240	01:00
0	0	66.3333	-66.3333	01:00
25	600	257.333	342.667	01:00
2	48	52	-4	01:00
0	0	13.3333	-13.3333	01:00
9	216	0	216	01:00
25	400	0	400	1:00
1	16	5.33333	10.6667	1:00
11	176	186	-10	1:00
6	96	16	80	1:00
9	144	26	118	1:00
48	768	0	768	1:00
12	192	0	192	1:00
6	96	3.66667	92.3333	1:00
0	0	0	0	1:00
9	144	138.333	5.66667	1:00
18	288	12.6667	275.333	1:00
23	368	0.333333	367.667	1:00
49	784	0	784	1:00
15	240	3	237	1:00
5	80	58.1667	21.8333	1:00
27	432	179.333	252.667	1:00
14	224	41.3333	182.667	1:00
5	80	6.66667	73.3333	1:00
12	192	0	192	1:00
11	176	0	176	1:00
3	48	18	30	1:00
9	144	187.333	-43.3333	1:00
13	208	52.3333	155.667	1:00
19	304	3.33333	300.667	1:00
12	192	0	192	1:00
7	112	0	112	1:00
1	16	0	16	1:00
4	64	179.5	-115.5	1:00
2	32	48	-16	1:00
0	0	0	0	1:00
18	288	0	288	1:00
9	144	0	144	1:00
0	0	0	0	1:00
15	240	126.5	113.5	1:00
0	0	97	-97	1:00
20	320	0	320	1:00
16	256	0	256	1:00
29	464	0	464	1:00
0	0	0	0	1:00
0	0	51.3333	-51.3333	1:00
12	192	196.5	-4.5	1:00
24	384	33	351	1:00
0	0	1.66667	-1.66667	1:00
8	128	0	128	1:00
49	784	0	784	1:00
0	0	5.66667	-5.66667	1:00
5	80	160.667	-80.6667	1:00
5	80	41.3333	38.6667	1:00
18	288	6	282	1:00
1	16	0	16	1:00
0	0	0	0	1:00
0	0	0.653061	-0.653061	1:00
0	0	143.333	-143.333	1:00
19	304	97.3333	206.667	1:00
0	0	15	-15	1:00
0	0	0	0	1:00
0	0	0	0	1:00
0	0	0	0	1:00
0	0	73.5	-73.5	1:00
8	128	97.3333	30.6667	1:00
0	0	10	-10	1:00
0	0	10	-10	1:00
1	16	0	16	1:00
0	0	5.66667	-5.66667	1:00
10	160	22.3333	137.667	1:00
0	0	153.167	-153.167	1:00
0	0	14.3333	-14.3333	1:00
0	0	2.66667	-2.66667	1:00
0	0	0	0	1:00
0	0	0	0	1:00
12	192	2.33333	189.667	1:00
0	0	167.333	-167.333	1:00
0	0	50.6667	-50.6667	1:00
2	32	4	28	1:00
1	16	0	16	1:00
0	0	0	0	1:00
0	0	0	0	1:00
0	0	126.333	-126.333	1:00
13	208	72	136	1:00
16	256	17.6667	238.333	1:00
1	16	0	16	1:00
3	48	0	48	1:00
0	0	0	0	1:00
7	112	95.3333	16.6667	1:00
0	0	130.667	-130.667	1:00
0	0	15	-15	1:00
0	0	1	-1	1:00
0	0	0	0	1:00
0	0	0	0	1:00
0	0	12.6667	-12.6667	1:00
0	0	123.5	-123.5	1:00
0	0	42	-42	1:00
0	0	2.66667	-2.66667	1:00
4	64	2.66667	61.3333	1:00
0	0	0	0	1:00
0	0	0	0	1:00
0	0	120	-120	1:00
0	0	33.6667	-33.6667	1:00
7	112	14.6667	97.3333	1:00
10	160	0	160	1:00
0	0	0	0	1:00
0	0	0	0	1:00
6	96	84.8333	11.1667	1:00
0	0	83	-83	1:00
0	0	17.6667	-17.6667	1:00
0	0	0	0	1:00
0	0	0	0	1:00
0	0	0	0	1:00
0	0	41	-41	1:00
0	0	137	-137	1:00
0	0	25.6667	-25.6667	1:00
0	0	1.66667	-1.66667	1:00
0	0	0	0	1:00
0	0	0	0	1:00
0	0	9	-9	1:00
3	48	148.667	-100.667	1:00
8	128	42.6667	85.3333	1:00
0	0	4.33333	-4.33333	1:00
0	0	0	0	1:00
0	0	0	0	1:00
0	0	0	0	1:00
0	0	118.5	-118.5	1:00
0	0	57.6667	-57.6667	1:00
0	0	15	-15	1:00
0	0	0	0	1:00
0	0	0	0	1:00
0	0	0	0	1:00
0	0	79.3333	-79.3333	1:00
0	0	107.667	-107.667	1:00
0	0	5.66667	-5.66667	1:00
0	0	0	0	1:00
0	0	0	0	1:00
0	0	0	0	1:00
0	0	38	-38	1:00
0	0	96.6667	-96.6667	1:00
0	0	21.2245	-21.2245	1:00
0	0	1	-1	1:00
0	0	0	0	1:00
0	0	0.666667	-0.666667	1:00
0	0	3	-3	1:00
0	0	137.167	-137.167	1:00
0	0	30.3333	-30.3333	1:00
0	0	3.33333	-3.33333	1:00
0	0	0	0	1:00
0	0	0	0	1:00
0	0	5.33333	-5.33333	1:00
0	0	136.667	-136.667	1:00
0	0	47.6667	-47.6667	1:00
0	0	3.66667	-3.66667	1:00
0	0	0	0	1:00
0	0	0	0	1:00
0	0	0	0	1:00
0	0	129.167	-129.167	1:00
0	0	75.6667	-75.6667	1:00
0	0	12	-12	1:00
0	0	0	0	1:00
0	0	0	0	1:00
0	0	0	0	1:00
0	0	45.6667	-45.6667	1:00
0	0	141.667	-141.667	1:00
0	0	13.6667	-13.6667	1:00
0	0	0	0	1:00
0	0	0	0	1:00
0	0	0	0	1:00
0	0	10.3333	-10.3333	1:00
0	0	182.667	-182.667	1:00
0	0	31.3333	-31.3333	1:00
0	0	0	0	1:00
0	0	0	0	1:00
0	0	0	0	1:00
0	0	0.326531	-0.326531	1:00
0	0	151.5	-151.5	1:00
0	0	48.6667	-48.6667	1:00
0	0	3	-3	1:00
0	0	0	0	1:00
0	0	0	0	1:00
0	0	0	0	1:00
0	0	86.6667	-86.6667	1:00
0	0	88.3333	-88.3333	1:00
0	0	13	-13	1:00
0	0	0	0	1:00
0	0	0	0	1:00
0	0	0	0	1:00
0	0	36.6667	-36.6667	1:00
0	0	147.333	-147.333	1:00
0	0	34.6667	-34.6667	1:00
0	0	0	0	1:00
0	0	0	0	1:00
0	0	0	0	1:00
0	0	24	-24	1:00
0	0	183.833	-183.833	1:00
0	0	34.6667	-34.6667	1:00
0	0	1	-1	1:00
0	0	0	0	1:00
0	0	0.666667	-0.666667	1:00
0	0	0	0	1:00
0	0	164	-164	1:00
0	0	73.3333	-73.3333	1:00
0	0	2.66667	-2.66667	1:00
0	0	0	0	1:00
0	0	0	0	1:00
0	0	3.66667	-3.66667	1:00
0	0	80	-80	1:00
0	0	139.667	-139.667	1:00
0	0	8.66667	-8.66667	1:00
0	0	0	0	1:00
0	0	0	0	1:00
0	0	4.33333	-4.33333	1:00
0	0	57	-57	1:00
0	0	161.667	-161.667	1:00
0	0	31	-31	1:00
0	0	1.66667	-1.66667	1:00
0	0	0	0	1:00
0	0	0	0	1:00
0	0	0.333333	-0.333333	1:00
0	0	181	-181	1:00
0	0	48.3333	-48.3333	1:00
0	0	7.66667	-7.66667	1:00
0	0	0	0	1:00
0	0	0	0	1:00
0	0	0.333333	-0.333333	1:00
0	0	223.333	-223.333	1:00
0	0	127	-127	1:00
0	0	11.6667	-11.6667	1:00
0	0	0.666667	-0.666667	1:00
0	0	0	0	1:00
0	0	0	0	1:00
0	0	102.333	-102.333	1:00
0	0	233.333	-233.333	1:00
0	0	36.3333	-36.3333	1:00
0	0	3.66667	-3.66667	1:00
0	0	0	0	1:00
0	0	0	0	1:00
0	0	26.3333	-26.3333	1:00
0	0	310.833	-310.833	1:00
0	0	27	-27	1:00
0	0	3.33333	-3.33333	1:00
0	0	0	0	1:00
0	0	0	0	1:00
0	0	0	0	1:00
0	0	266.167	-266.167	1:00
0	0	96.6667	-96.6667	1:00
0	0	6.33333	-6.33333	1:00
0	0	0	0	1:00
0	0	0	0	1:00
0	0	0	0	1:00
0	0	167.667	-167.667	1:00
0	0	158.667	-158.667	1:00
0	0	24	-24	1:00
0	0	0	0	1:00
0	0	0	0	1:00
11	176	0	176	1:00
0	0	72.5	-72.5	1:00
0	0	233.667	-233.667	1:00
0	0	28	-28	1:00
0	0	7.33333	-7.33333	1:00
0	0	0	0	1:00
0	0	0	0	1:00
0	0	10	-10	1:00
0	0	241	-241	1:00
0	0	95.6667	-95.6667	1:00
0	0	7.33333	-7.33333	1:00
0	0	0	0	1:00
0	0	0	0	1:00
0	0	0	0	1:00
0	0	217.833	-217.833	1:00
0	0	135.667	-135.667	1:00
0	0	11	-11	1:00
0	0	0	0	1:00
0	0	0	0	1:00
0	0	0	0	1:00
1	16	154.167	-138.167	1:00
0	0	221	-221	1:00
0	0	7.66667	-7.66667	1:00
0	0	0.333333	-0.333333	1:00
0	0	0	0	1:00
19	304	0	304	1:00
0	0	75.6667	-75.6667	1:00
0	0	200.667	-200.667	1:00
0	0	42.3333	-42.3333	1:00
0	0	8	-8	1:00
4	64	0	64	1:00
6	96	0	96	1:00
0	0	0.333333	-0.333333	1:00
0	0	251.167	-251.167	1:00
0	0	78.3333	-78.3333	1:00
7	112	7.66667	104.333	1:00
0	0	0	0	1:00
4	64	0	64	1:00
49	784	0	784	1:00
7	112	33.6842	78.3158	1:00
2	48	148.667	-100.667	01:30
32	768	20.3333	747.667	01:30
20	480	0	480	01:30
1	24	0	24	01:30
9	216	0	216	01:30
6	144	66.3333	77.6667	01:30
19	456	257.333	198.667	01:30
7	168	52	116	01:30
0	0	13.3333	-13.3333	01:30
12	288	0	288	01:30
44	704	0	704	1:30
13	208	5.33333	202.667	1:30
5	80	186	-106	1:30
4	64	16	48	1:30
1	16	26	-10	1:30
37	592	0	592	1:30
5	80	0	80	1:30
1	16	3.66667	12.3333	1:30
8	128	0	128	1:30
12	192	138.333	53.6667	1:30
25	400	12.6667	387.333	1:30
25	400	0.333333	399.667	1:30
21	336	0	336	1:30
3	48	3	45	1:30
26	416	58.1667	357.833	1:30
23	368	179.333	188.667	1:30
24	384	41.3333	342.667	1:30
9	144	6.66667	137.333	1:30
3	48	0	48	1:30
10	160	0	160	1:30
23	368	18	350	1:30
13	208	187.333	20.6667	1:30
18	288	52.3333	235.667	1:30
2	32	3.33333	28.6667	1:30
4	64	0	64	1:30
8	128	0	128	1:30
0	0	0	0	1:30
5	80	179.5	-99.5	1:30
0	0	48	-48	1:30
0	0	0	0	1:30
8	128	0	128	1:30
40	640	0	640	1:30
18	288	0	288	1:30
11	176	126.5	49.5	1:30
0	0	97	-97	1:30
14	224	0	224	1:30
13	208	0	208	1:30
27	432	0	432	1:30
10	160	0	160	1:30
1	16	51.3333	-35.3333	1:30
12	192	196.5	-4.5	1:30
0	0	33	-33	1:30
0	0	1.66667	-1.66667	1:30
3	48	0	48	1:30
10	160	0	160	1:30
21	336	5.66667	330.333	1:30
11	176	160.667	15.3333	1:30
0	0	41.3333	-41.3333	1:30
0	0	6	-6	1:30
0	0	0	0	1:30
0	0	0	0	1:30
0	0	0.653061	-0.653061	1:30
0	0	143.333	-143.333	1:30
9	144	97.3333	46.6667	1:30
0	0	15	-15	1:30
0	0	0	0	1:30
0	0	0	0	1:30
11	176	0	176	1:30
28	448	73.5	374.5	1:30
0	0	97.3333	-97.3333	1:30
0	0	10	-10	1:30
0	0	10	-10	1:30
0	0	0	0	1:30
0	0	5.66667	-5.66667	1:30
2	32	22.3333	9.66667	1:30
0	0	153.167	-153.167	1:30
0	0	14.3333	-14.3333	1:30
0	0	2.66667	-2.66667	1:30
0	0	0	0	1:30
0	0	0	0	1:30
0	0	2.33333	-2.33333	1:30
0	0	167.333	-167.333	1:30
0	0	50.6667	-50.6667	1:30
0	0	4	-4	1:30
0	0	0	0	1:30
0	0	0	0	1:30
0	0	0	0	1:30
3	48	126.333	-78.3333	1:30
0	0	72	-72	1:30
3	48	17.6667	30.3333	1:30
6	96	0	96	1:30
5	80	0	80	1:30
0	0	0	0	1:30
1	16	95.3333	-79.3333	1:30
12	192	130.667	61.3333	1:30
0	0	15	-15	1:30
0	0	1	-1	1:30
0	0	0	0	1:30
0	0	0	0	1:30
0	0	12.6667	-12.6667	1:30
0	0	123.5	-123.5	1:30
0	0	42	-42	1:30
0	0	2.66667	-2.66667	1:30
0	0	2.66667	-2.66667	1:30
0	0	0	0	1:30
0	0	0	0	1:30
0	0	120	-120	1:30
0	0	33.6667	-33.6667	1:30
0	0	14.6667	-14.6667	1:30
6	96	0	96	1:30
0	0	0	0	1:30
0	0	0	0	1:30
0	0	84.8333	-84.8333	1:30
0	0	83	-83	1:30
0	0	17.6667	-17.6667	1:30
0	0	0	0	1:30
0	0	0	0	1:30
0	0	0	0	1:30
0	0	41	-41	1:30
0	0	137	-137	1:30
0	0	25.6667	-25.6667	1:30
0	0	1.66667	-1.66667	1:30
0	0	0	0	1:30
0	0	0	0	1:30
0	0	9	-9	1:30
0	0	148.667	-148.667	1:30
0	0	42.6667	-42.6667	1:30
0	0	4.33333	-4.33333	1:30
0	0	0	0	1:30
0	0	0	0	1:30
0	0	0	0	1:30
0	0	118.5	-118.5	1:30
0	0	57.6667	-57.6667	1:30
0	0	15	-15	1:30
0	0	0	0	1:30
0	0	0	0	1:30
0	0	0	0	1:30
0	0	79.3333	-79.3333	1:30
0	0	107.667	-107.667	1:30
0	0	5.66667	-5.66667	1:30
0	0	0	0	1:30
0	0	0	0	1:30
0	0	0	0	1:30
0	0	38	-38	1:30
0	0	96.6667	-96.6667	1:30
0	0	21.2245	-21.2245	1:30
0	0	1	-1	1:30
0	0	0	0	1:30
0	0	0.666667	-0.666667	1:30
1	16	3	13	1:30
0	0	137.167	-137.167	1:30
0	0	30.3333	-30.3333	1:30
0	0	3.33333	-3.33333	1:30
0	0	0	0	1:30
0	0	0	0	1:30
0	0	5.33333	-5.33333	1:30
0	0	136.667	-136.667	1:30
0	0	47.6667	-47.6667	1:30
0	0	3.66667	-3.66667	1:30
0	0	0	0	1:30
0	0	0	0	1:30
0	0	0	0	1:30
0	0	129.167	-129.167	1:30
0	0	75.6667	-75.6667	1:30
0	0	12	-12	1:30
0	0	0	0	1:30
0	0	0	0	1:30
0	0	0	0	1:30
0	0	45.6667	-45.6667	1:30
0	0	141.667	-141.667	1:30
0	0	13.6667	-13.6667	1:30
0	0	0	0	1:30
0	0	0	0	1:30
0	0	0	0	1:30
0	0	10.3333	-10.3333	1:30
0	0	182.667	-182.667	1:30
0	0	31.3333	-31.3333	1:30
0	0	0	0	1:30
0	0	0	0	1:30
0	0	0	0	1:30
0	0	0.326531	-0.326531	1:30
0	0	151.5	-151.5	1:30
0	0	48.6667	-48.6667	1:30
0	0	3	-3	1:30
0	0	0	0	1:30
0	0	0	0	1:30
0	0	0	0	1:30
0	0	86.6667	-86.6667	1:30
0	0	88.3333	-88.3333	1:30
0	0	13	-13	1:30
0	0	0	0	1:30
0	0	0	0	1:30
0	0	0	0	1:30
0	0	36.6667	-36.6667	1:30
0	0	147.333	-147.333	1:30
0	0	34.6667	-34.6667	1:30
0	0	0	0	1:30
0	0	0	0	1:30
0	0	0	0	1:30
0	0	24	-24	1:30
0	0	183.833	-183.833	1:30
0	0	34.6667	-34.6667	1:30
0	0	1	-1	1:30
0	0	0	0	1:30
0	0	0.666667	-0.666667	1:30
0	0	0	0	1:30
0	0	164	-164	1:30
0	0	73.3333	-73.3333	1:30
0	0	2.66667	-2.66667	1:30
0	0	0	0	1:30
0	0	0	0	1:30
0	0	3.66667	-3.66667	1:30
0	0	80	-80	1:30
0	0	139.667	-139.667	1:30
0	0	8.66667	-8.66667	1:30
0	0	0	0	1:30
0	0	0	0	1:30
0	0	4.33333	-4.33333	1:30
0	0	57	-57	1:30
0	0	161.667	-161.667	1:30
0	0	31	-31	1:30
0	0	1.66667	-1.66667	1:30
0	0	0	0	1:30
0	0	0	0	1:30
0	0	0.333333	-0.333333	1:30
0	0	181	-181	1:30
0	0	48.3333	-48.3333	1:30
0	0	7.66667	-7.66667	1:30
0	0	0	0	1:30
0	0	0	0	1:30
0	0	0.333333	-0.333333	1:30
0	0	223.333	-223.333	1:30
0	0	127	-127	1:30
0	0	11.6667	-11.6667	1:30
0	0	0.666667	-0.666667	1:30
0	0	0	0	1:30
0	0	0	0	1:30
0	0	102.333	-102.333	1:30
0	0	233.333	-233.333	1:30
0	0	36.3333	-36.3333	1:30
0	0	3.66667	-3.66667	1:30
0	0	0	0	1:30
0	0	0	0	1:30
0	0	26.3333	-26.3333	1:30
0	0	310.833	-310.833	1:30
0	0	27	-27	1:30
0	0	3.33333	-3.33333	1:30
0	0	0	0	1:30
0	0	0	0	1:30
0	0	0	0	1:30
0	0	266.167	-266.167	1:30
0	0	96.6667	-96.6667	1:30
0	0	6.33333	-6.33333	1:30
0	0	0	0	1:30
0	0	0	0	1:30
0	0	0	0	1:30
0	0	167.667	-167.667	1:30
0	0	158.667	-158.667	1:30
0	0	24	-24	1:30
0	0	0	0	1:30
0	0	0	0	1:30
9	144	0	144	1:30
0	0	72.5	-72.5	1:30
0	0	233.667	-233.667	1:30
0	0	28	-28	1:30
0	0	7.33333	-7.33333	1:30
0	0	0	0	1:30
0	0	0	0	1:30
0	0	10	-10	1:30
0	0	241	-241	1:30
0	0	95.6667	-95.6667	1:30
0	0	7.33333	-7.33333	1:30
0	0	0	0	1:30
0	0	0	0	1:30
0	0	0	0	1:30
0	0	217.833	-217.833	1:30
0	0	135.667	-135.667	1:30
0	0	11	-11	1:30
0	0	0	0	1:30
0	0	0	0	1:30
0	0	0	0	1:30
0	0	154.167	-154.167	1:30
0	0	221	-221	1:30
0	0	7.66667	-7.66667	1:30
0	0	0.333333	-0.333333	1:30
0	0	0	0	1:30
2	32	0	32	1:30
0	0	75.6667	-75.6667	1:30
0	0	200.667	-200.667	1:30
0	0	42.3333	-42.3333	1:30
0	0	8	-8	1:30
9	144	0	144	1:30
0	0	0	0	1:30
0	0	0.333333	-0.333333	1:30
0	0	251.167	-251.167	1:30
0	0	78.3333	-78.3333	1:30
4	64	7.66667	56.3333	1:30
0	0	0	0	1:30
5	80	0	80	1:30
6	96	0	96	1:30
12	192	33.6842	158.316	1:30
3	72	148.667	-76.6667	02:00
18	432	20.3333	411.667	02:00
16	384	0	384	02:00
6	144	0	144	02:00
7	168	0	168	02:00
1	24	66.3333	-42.3333	02:00
20	480	257.333	222.667	02:00
6	144	52	92	02:00
0	0	13.3333	-13.3333	02:00
2	48	0	48	02:00
18	288	0	288	2:00
14	224	5.33333	218.667	2:00
16	256	186	70	2:00
14	224	16	208	2:00
0	0	26	-26	2:00
30	480	0	480	2:00
30	480	0	480	2:00
12	192	3.66667	188.333	2:00
8	128	0	128	2:00
9	144	138.333	5.66667	2:00
18	288	12.6667	275.333	2:00
28	448	0.333333	447.667	2:00
26	416	0	416	2:00
10	160	3	157	2:00
36	576	58.1667	517.833	2:00
43	688	179.333	508.667	2:00
7	112	41.3333	70.6667	2:00
11	176	6.66667	169.333	2:00
4	64	0	64	2:00
18	288	0	288	2:00
16	256	18	238	2:00
6	96	187.333	-91.3333	2:00
9	144	52.3333	91.6667	2:00
7	112	3.33333	108.667	2:00
19	304	0	304	2:00
1	16	0	16	2:00
0	0	0	0	2:00
4	64	179.5	-115.5	2:00
3	48	48	0	2:00
4	64	0	64	2:00
1	16	0	16	2:00
16	256	0	256	2:00
4	64	0	64	2:00
4	64	126.5	-62.5	2:00
1	16	97	-81	2:00
6	96	0	96	2:00
26	416	0	416	2:00
25	400	0	400	2:00
3	48	0	48	2:00
4	64	51.3333	12.6667	2:00
0	0	196.5	-196.5	2:00
0	0	33	-33	2:00
0	0	1.66667	-1.66667	2:00
7	112	0	112	2:00
10	160	0	160	2:00
16	256	5.66667	250.333	2:00
2	32	160.667	-128.667	2:00
10	160	41.3333	118.667	2:00
0	0	6	-6	2:00
0	0	0	0	2:00
0	0	0.653061	-0.653061	2:00
0	0	143.333	-143.333	2:00
23	368	97.3333	270.667	2:00
0	0	15	-15	2:00
0	0	0	0	2:00
0	0	0	0	2:00
16	256	0	256	2:00
6	96	73.5	22.5	2:00
3	48	97.3333	-49.3333	2:00
0	0	10	-10	2:00
0	0	10	-10	2:00
8	128	0	128	2:00
5	80	5.66667	74.3333	2:00
9	144	22.3333	121.667	2:00
0	0	153.167	-153.167	2:00
0	0	14.3333	-14.3333	2:00
0	0	2.66667	-2.66667	2:00
0	0	0	0	2:00
0	0	0	0	2:00
1	16	2.33333	13.6667	2:00
0	0	167.333	-167.333	2:00
0	0	50.6667	-50.6667	2:00
0	0	4	-4	2:00
0	0	0	0	2:00
0	0	0	0	2:00
0	0	0	0	2:00
12	192	126.333	65.6667	2:00
4	64	72	-8	2:00
23	368	17.6667	350.333	2:00
2	32	0	32	2:00
3	48	0	48	2:00
0	0	0	0	2:00
0	0	95.3333	-95.3333	2:00
0	0	130.667	-130.667	2:00
0	0	15	-15	2:00
0	0	1	-1	2:00
0	0	0	0	2:00
4	64	0	64	2:00
5	80	12.6667	67.3333	2:00
0	0	123.5	-123.5	2:00
0	0	42	-42	2:00
0	0	2.66667	-2.66667	2:00
0	0	2.66667	-2.66667	2:00
0	0	0	0	2:00
0	0	0	0	2:00
0	0	120	-120	2:00
0	0	33.6667	-33.6667	2:00
0	0	14.6667	-14.6667	2:00
14	224	0	224	2:00
0	0	0	0	2:00
0	0	0	0	2:00
1	16	84.8333	-68.8333	2:00
0	0	83	-83	2:00
0	0	17.6667	-17.6667	2:00
0	0	0	0	2:00
0	0	0	0	2:00
0	0	0	0	2:00
0	0	41	-41	2:00
0	0	137	-137	2:00
0	0	25.6667	-25.6667	2:00
0	0	1.66667	-1.66667	2:00
0	0	0	0	2:00
0	0	0	0	2:00
0	0	9	-9	2:00
0	0	148.667	-148.667	2:00
4	64	42.6667	21.3333	2:00
0	0	4.33333	-4.33333	2:00
0	0	0	0	2:00
0	0	0	0	2:00
0	0	0	0	2:00
0	0	118.5	-118.5	2:00
0	0	57.6667	-57.6667	2:00
0	0	15	-15	2:00
0	0	0	0	2:00
0	0	0	0	2:00
0	0	0	0	2:00
0	0	79.3333	-79.3333	2:00
0	0	107.667	-107.667	2:00
0	0	5.66667	-5.66667	2:00
0	0	0	0	2:00
0	0	0	0	2:00
0	0	0	0	2:00
0	0	38	-38	2:00
0	0	96.6667	-96.6667	2:00
0	0	21.2245	-21.2245	2:00
0	0	1	-1	2:00
0	0	0	0	2:00
0	0	0.666667	-0.666667	2:00
1	16	3	13	2:00
0	0	137.167	-137.167	2:00
0	0	30.3333	-30.3333	2:00
0	0	3.33333	-3.33333	2:00
0	0	0	0	2:00
0	0	0	0	2:00
0	0	5.33333	-5.33333	2:00
0	0	136.667	-136.667	2:00
0	0	47.6667	-47.6667	2:00
0	0	3.66667	-3.66667	2:00
0	0	0	0	2:00
0	0	0	0	2:00
0	0	0	0	2:00
0	0	129.167	-129.167	2:00
0	0	75.6667	-75.6667	2:00
0	0	12	-12	2:00
0	0	0	0	2:00
0	0	0	0	2:00
0	0	0	0	2:00
0	0	45.6667	-45.6667	2:00
0	0	141.667	-141.667	2:00
0	0	13.6667	-13.6667	2:00
0	0	0	0	2:00
0	0	0	0	2:00
0	0	0	0	2:00
0	0	10.3333	-10.3333	2:00
0	0	182.667	-182.667	2:00
0	0	31.3333	-31.3333	2:00
0	0	0	0	2:00
0	0	0	0	2:00
0	0	0	0	2:00
0	0	0.326531	-0.326531	2:00
0	0	151.5	-151.5	2:00
0	0	48.6667	-48.6667	2:00
0	0	3	-3	2:00
0	0	0	0	2:00
0	0	0	0	2:00
0	0	0	0	2:00
0	0	86.6667	-86.6667	2:00
0	0	88.3333	-88.3333	2:00
0	0	13	-13	2:00
0	0	0	0	2:00
0	0	0	0	2:00
0	0	0	0	2:00
0	0	36.6667	-36.6667	2:00
0	0	147.333	-147.333	2:00
0	0	34.6667	-34.6667	2:00
0	0	0	0	2:00
0	0	0	0	2:00
0	0	0	0	2:00
0	0	24	-24	2:00
0	0	183.833	-183.833	2:00
0	0	34.6667	-34.6667	2:00
0	0	1	-1	2:00
0	0	0	0	2:00
0	0	0.666667	-0.666667	2:00
0	0	0	0	2:00
0	0	164	-164	2:00
0	0	73.3333	-73.3333	2:00
0	0	2.66667	-2.66667	2:00
0	0	0	0	2:00
0	0	0	0	2:00
0	0	3.66667	-3.66667	2:00
0	0	80	-80	2:00
0	0	139.667	-139.667	2:00
0	0	8.66667	-8.66667	2:00
0	0	0	0	2:00
0	0	0	0	2:00
0	0	4.33333	-4.33333	2:00
0	0	57	-57	2:00
0	0	161.667	-161.667	2:00
0	0	31	-31	2:00
0	0	1.66667	-1.66667	2:00
0	0	0	0	2:00
0	0	0	0	2:00
0	0	0.333333	-0.333333	2:00
0	0	181	-181	2:00
0	0	48.3333	-48.3333	2:00
0	0	7.66667	-7.66667	2:00
0	0	0	0	2:00
0	0	0	0	2:00
0	0	0.333333	-0.333333	2:00
0	0	223.333	-223.333	2:00
0	0	127	-127	2:00
0	0	11.6667	-11.6667	2:00
0	0	0.666667	-0.666667	2:00
0	0	0	0	2:00
0	0	0	0	2:00
0	0	102.333	-102.333	2:00
0	0	233.333	-233.333	2:00
0	0	36.3333	-36.3333	2:00
0	0	3.66667	-3.66667	2:00
0	0	0	0	2:00
0	0	0	0	2:00
0	0	26.3333	-26.3333	2:00
0	0	310.833	-310.833	2:00
0	0	27	-27	2:00
0	0	3.33333	-3.33333	2:00
0	0	0	0	2:00
0	0	0	0	2:00
0	0	0	0	2:00
0	0	266.167	-266.167	2:00
0	0	96.6667	-96.6667	2:00
0	0	6.33333	-6.33333	2:00
0	0	0	0	2:00
0	0	0	0	2:00
0	0	0	0	2:00
0	0	167.667	-167.667	2:00
0	0	158.667	-158.667	2:00
0	0	24	-24	2:00
0	0	0	0	2:00
0	0	0	0	2:00
2	32	0	32	2:00
0	0	72.5	-72.5	2:00
0	0	233.667	-233.667	2:00
0	0	28	-28	2:00
0	0	7.33333	-7.33333	2:00
0	0	0	0	2:00
0	0	0	0	2:00
0	0	10	-10	2:00
0	0	241	-241	2:00
0	0	95.6667	-95.6667	2:00
0	0	7.33333	-7.33333	2:00
0	0	0	0	2:00
0	0	0	0	2:00
[truncated: 12,955 more rows]

## Sheet: Diel hrs upcall
											Calls
[truncated: 14,433 more rows]

[truncated: 5 more sheets: Call types, Call type Monthly %, Call type seasonal rate, Call type diel period %, Call type diel rate]
