# Supplementary material for: Temporal variation in the vocal behaviour of southern right whales in the Auckland Islands, New Zealand
Source: R Soc Open Sci. 2019 Mar 20;6(3):181487. doi: 10.1098/rsos.181487 (PMC6458419; doi:10.1098/rsos.181487)
Supplement: Summary of the detector performance data [file rsos181487supp2.xlsx]

## Sheet: Detector data
Line number	Folder	DSGnumber	RWcalls	NoOfCalls	Upcall	Downcall	Gunshot	TonalLow	LongTonalLow	Pulsive	Hybrid	High	VeryHigh	Blow	UpcallDetector	TP	FP	FN	PPV=TP/(TP+FP)	Sensitivity=TPR=TP/(TP+FN)	Deviation	Season	Date	Time	DielPeriod
395	2011	0804	No	0	0	0	0	0	0	0	0	0	0	0	0	0	0	0	#DIV/0!	#DIV/0!	0	Winter	2011-07-30	18:00	Dusk
623	000	0149	No	0	0	0	0	0	0	0	0	0	0	0	0	0	0	0	#DIV/0!	#DIV/0!	0	Winter	2011-08-09	15:00	Afternoon
989	000	0515	No	0	0	0	0	0	0	0	0	0	0	0	0	0	0	0	#DIV/0!	#DIV/0!	0	Winter	2011-08-17	6:00	Night
1535	000	1061	No	0	0	0	0	0	0	0	0	0	0	0	0	0	0	0	#DIV/0!	#DIV/0!	0	Winter	2011-08-28	15:00	Afternoon
1724	000	1250	No	0	0	0	0	0	0	0	0	0	0	0	0	0	0	0	#DIV/0!	#DIV/0!	0	Spring	2011-09-01	13:30	Afternoon
1774	000	1300	No	0	0	0	0	0	0	0	0	0	0	0	0	0	0	0	#DIV/0!	#DIV/0!	0	Spring	2011-09-02	14:30	Afternoon
1886	000	1412	No	0	0	0	0	0	0	0	0	0	0	0	0	0	0	0	#DIV/0!	#DIV/0!	0	Spring	2011-09-04	22:30	Night
2129	000	1655	No	0	0	0	0	0	0	0	0	0	0	0	0	0	0	0	#DIV/0!	#DIV/0!	0	Spring	2011-09-10	0:00	Night
2132	000	1658	No	0	0	0	0	0	0	0	0	0	0	0	0	0	0	0	#DIV/0!	#DIV/0!	0	Spring	2011-09-10	1:30	Night
2450	000	1976	No	0	0	0	0	0	0	0	0	0	0	0	0	0	0	0	#DIV/0!	#DIV/0!	0	Spring	2011-09-16	16:30	Afternoon
2454	000	1980	No	0	0	0	0	0	0	0	0	0	0	0	0	0	0	0	#DIV/0!	#DIV/0!	0	Spring	2011-09-16	18:30	Afternoon
2472	000	1998	No	0	0	0	0	0	0	0	0	0	0	0	0	0	0	0	#DIV/0!	#DIV/0!	0	Spring	2011-09-17	3:30	Night
2508	000	2034	No	0	0	0	0	0	0	0	0	0	0	0	0	0	0	0	#DIV/0!	#DIV/0!	0	Spring	2011-09-17	21:30	Night
2608	000	2134	No	0	0	0	0	0	0	0	0	0	0	0	0	0	0	0	#DIV/0!	#DIV/0!	0	Spring	2011-09-19	23:30	Night
2658	000	2184	No	0	0	0	0	0	0	0	0	0	0	0	0	0	0	0	#DIV/0!	#DIV/0!	0	Spring	2011-09-21	0:30	Night
2670	000	2196	No	0	0	0	0	0	0	0	0	0	0	0	0	0	0	0	#DIV/0!	#DIV/0!	0	Spring	2011-09-21	6:30	Dawn
2671	000	2197	No	0	0	0	0	0	0	0	0	0	0	0	0	0	0	0	#DIV/0!	#DIV/0!	0	Spring	2011-09-21	7:00	Morning
2727	000	2253	No	0	0	0	0	0	0	0	0	0	0	0	0	0	0	0	#DIV/0!	#DIV/0!	0	Spring	2011-09-22	11:00	Morning
2731	000	2257	No	0	0	0	0	0	0	0	0	0	0	0	0	0	0	0	#DIV/0!	#DIV/0!	0	Spring	2011-09-22	13:00	Afternoon
2784	000	2310	No	0	0	0	0	0	0	0	0	0	0	0	0	0	0	0	#DIV/0!	#DIV/0!	0	Spring	2011-09-23	15:30	Afternoon
2831	000	2357	No	0	0	0	0	0	0	0	0	0	0	0	0	0	0	0	#DIV/0!	#DIV/0!	0	Spring	2011-09-24	15:00	Afternoon
2861	000	2387	No	0	0	0	0	0	0	0	0	0	0	0	0	0	0	0	#DIV/0!	#DIV/0!	0	Spring	2011-09-25	7:00	Morning
2869	000	2395	No	0	0	0	0	0	0	0	0	0	0	0	0	0	0	0	#DIV/0!	#DIV/0!	0	Spring	2011-09-25	11:00	Morning
2873	000	2399	No	0	0	0	0	0	0	0	0	0	0	0	0	0	0	0	#DIV/0!	#DIV/0!	0	Spring	2011-09-25	13:00	Afternoon
2901	000	2427	No	0	0	0	0	0	0	0	0	0	0	0	0	0	0	0	#DIV/0!	#DIV/0!	0	Spring	2011-09-26	3:00	Night
2916	000	2442	No	0	0	0	0	0	0	0	0	0	0	0	0	0	0	0	#DIV/0!	#DIV/0!	0	Spring	2011-09-26	10:30	Morning
2936	000	2462	No	0	0	0	0	0	0	0	0	0	0	0	0	0	0	0	#DIV/0!	#DIV/0!	0	Spring	2011-09-26	20:30	Night
2973	000	2499	No	0	0	0	0	0	0	0	0	0	0	0	0	0	0	0	#DIV/0!	#DIV/0!	0	Spring	2011-09-27	15:00	Afternoon
2992	000	2518	No	0	0	0	0	0	0	0	0	0	0	0	0	0	0	0	#DIV/0!	#DIV/0!	0	Spring	2011-09-28	0:30	Night
3013	000	2539	No	0	0	0	0	0	0	0	0	0	0	0	0	0	0	0	#DIV/0!	#DIV/0!	0	Spring	2011-09-28	11:00	Morning
3017	000	2543	No	0	0	0	0	0	0	0	0	0	0	0	0	0	0	0	#DIV/0!	#DIV/0!	0	Spring	2011-09-28	13:00	Afternoon
3049	000	2575	No	0	0	0	0	0	0	0	0	0	0	0	0	0	0	0	#DIV/0!	#DIV/0!	0	Spring	2011-09-29	5:00	Night
3065	000	2591	No	0	0	0	0	0	0	0	0	0	0	0	0	0	0	0	#DIV/0!	#DIV/0!	0	Spring	2011-09-29	13:00	Afternoon
3069	000	2595	No	0	0	0	0	0	0	0	0	0	0	0	0	0	0	0	#DIV/0!	#DIV/0!	0	Spring	2011-09-29	15:00	Afternoon
3073	000	2599	No	0	0	0	0	0	0	0	0	0	0	0	0	0	0	0	#DIV/0!	#DIV/0!	0	Spring	2011-09-29	17:00	Afternoon
3088	000	2614	No	0	0	0	0	0	0	0	0	0	0	0	0	0	0	0	#DIV/0!	#DIV/0!	0	Spring	2011-09-30	0:30	Night
3090	000	2616	No	0	0	0	0	0	0	0	0	0	0	0	0	0	0	0	#DIV/0!	#DIV/0!	0	Spring	2011-09-30	1:30	Night
3099	000	2625	No	0	0	0	0	0	0	0	0	0	0	0	0	0	0	0	#DIV/0!	#DIV/0!	0	Spring	2011-09-30	6:00	Dawn
3100	000	2626	No	0	0	0	0	0	0	0	0	0	0	0	0	0	0	0	#DIV/0!	#DIV/0!	0	Spring	2011-09-30	6:30	Morning
3107	000	2633	No	0	0	0	0	0	0	0	0	0	0	0	0	0	0	0	#DIV/0!	#DIV/0!	0	Spring	2011-09-30	10:00	Morning
3145	000	2671	No	0	0	0	0	0	0	0	0	0	0	0	0	0	0	0	#DIV/0!	#DIV/0!	0	Spring	2011-10-01	5:00	Night
3159	000	2685	No	0	0	0	0	0	0	0	0	0	0	0	0	0	0	0	#DIV/0!	#DIV/0!	0	Spring	2011-10-01	12:00	Morning
3167	000	2693	No	0	0	0	0	0	0	0	0	0	0	0	0	0	0	0	#DIV/0!	#DIV/0!	0	Spring	2011-10-01	16:00	Afternoon
3194	000	2720	No	0	0	0	0	0	0	0	0	0	0	0	0	0	0	0	#DIV/0!	#DIV/0!	0	Spring	2011-10-02	5:30	Dawn
3201	000	2727	No	0	0	0	0	0	0	0	0	0	0	0	0	0	0	0	#DIV/0!	#DIV/0!	0	Spring	2011-10-02	9:00	Morning
3247	000	2773	No	0	0	0	0	0	0	0	0	0	0	0	0	0	0	0	#DIV/0!	#DIV/0!	0	Spring	2011-10-03	8:00	Morning
3248	000	2774	No	0	0	0	0	0	0	0	0	0	0	0	0	0	0	0	#DIV/0!	#DIV/0!	0	Spring	2011-10-03	8:30	Morning
3324	000	2850	No	0	0	0	0	0	0	0	0	0	0	0	0	0	0	0	#DIV/0!	#DIV/0!	0	Spring	2011-10-04	22:30	Night
3359	000	2885	No	0	0	0	0	0	0	0	0	0	0	0	0	0	0	0	#DIV/0!	#DIV/0!	0	Spring	2011-10-05	16:00	Afternoon
3391	000	2917	No	0	0	0	0	0	0	0	0	0	0	0	0	0	0	0	#DIV/0!	#DIV/0!	0	Spring	2011-10-06	8:00	Morning
3411	000	2937	No	0	0	0	0	0	0	0	0	0	0	0	0	0	0	0	#DIV/0!	#DIV/0!	0	Spring	2011-10-06	18:00	Afternoon
3466	000	2992	No	0	0	0	0	0	0	0	0	0	0	0	0	0	0	0	#DIV/0!	#DIV/0!	0	Spring	2011-10-07	21:30	Night
3481	000	3007	No	0	0	0	0	0	0	0	0	0	0	0	0	0	0	0	#DIV/0!	#DIV/0!	0	Spring	2011-10-08	5:00	Dawn
3483	000	3009	No	0	0	0	0	0	0	0	0	0	0	0	0	0	0	0	#DIV/0!	#DIV/0!	0	Spring	2011-10-08	6:00	Dawn
3506	000	3032	No	0	0	0	0	0	0	0	0	0	0	0	0	0	0	0	#DIV/0!	#DIV/0!	0	Spring	2011-10-08	17:30	Afternoon
3508	000	3034	No	0	0	0	0	0	0	0	0	0	0	0	0	0	0	0	#DIV/0!	#DIV/0!	0	Spring	2011-10-08	18:30	Afternoon
3517	000	3043	No	0	0	0	0	0	0	0	0	0	0	0	0	0	0	0	#DIV/0!	#DIV/0!	0	Spring	2011-10-08	23:00	Night
3608	000	3134	No	0	0	0	0	0	0	0	0	0	0	0	0	0	0	0	#DIV/0!	#DIV/0!	0	Spring	2011-10-10	20:30	Dusk
3619	000	3145	No	0	0	0	0	0	0	0	0	0	0	0	0	0	0	0	#DIV/0!	#DIV/0!	0	Spring	2011-10-11	2:00	Night
3623	000	3149	No	0	0	0	0	0	0	0	0	0	0	0	0	0	0	0	#DIV/0!	#DIV/0!	0	Spring	2011-10-11	4:00	Night
3650	000	3176	No	0	0	0	0	0	0	0	0	0	0	0	0	0	0	0	#DIV/0!	#DIV/0!	0	Spring	2011-10-11	17:30	Afternoon
3661	000	3187	No	0	0	0	0	0	0	0	0	0	0	0	0	0	0	0	#DIV/0!	#DIV/0!	0	Spring	2011-10-11	23:00	Night
3703	000	3229	No	0	0	0	0	0	0	0	0	0	0	0	0	0	0	0	#DIV/0!	#DIV/0!	0	Spring	2011-10-12	20:00	Dusk
3717	000	3243	No	0	0	0	0	0	0	0	0	0	0	0	0	0	0	0	#DIV/0!	#DIV/0!	0	Spring	2011-10-13	3:00	Night
3728	000	3254	No	0	0	0	0	0	0	0	0	0	0	0	0	0	0	0	#DIV/0!	#DIV/0!	0	Spring	2011-10-13	8:30	Morning
3729	000	3255	No	0	0	0	0	0	0	0	0	0	0	0	0	0	0	0	#DIV/0!	#DIV/0!	0	Spring	2011-10-13	9:00	Morning
3731	000	3257	No	0	0	0	0	0	0	0	0	0	0	0	0	0	0	0	#DIV/0!	#DIV/0!	0	Spring	2011-10-13	10:00	Morning
3735	000	3261	No	0	0	0	0	0	0	0	0	0	0	0	0	0	0	0	#DIV/0!	#DIV/0!	0	Spring	2011-10-13	12:00	Morning
3744	000	3270	No	0	0	0	0	0	0	0	0	0	0	0	0	0	0	0	#DIV/0!	#DIV/0!	0	Spring	2011-10-13	16:30	Afternoon
3782	000	3308	No	0	0	0	0	0	0	0	0	0	0	0	0	0	0	0	#DIV/0!	#DIV/0!	0	Spring	2011-10-14	11:30	Morning
3785	000	3311	No	0	0	0	0	0	0	0	0	0	0	0	0	0	0	0	#DIV/0!	#DIV/0!	0	Spring	2011-10-14	13:00	Afternoon
3794	000	3320	No	0	0	0	0	0	0	0	0	0	0	0	0	0	0	0	#DIV/0!	#DIV/0!	0	Spring	2011-10-14	17:30	Afternoon
3829	000	3355	No	0	0	0	0	0	0	0	0	0	0	0	0	0	0	0	#DIV/0!	#DIV/0!	0	Spring	2011-10-15	11:00	Morning
3830	000	3356	No	0	0	0	0	0	0	0	0	0	0	0	0	0	0	0	#DIV/0!	#DIV/0!	0	Spring	2011-10-15	11:30	Morning
3858	000	3384	No	0	0	0	0	0	0	0	0	0	0	0	0	0	0	0	#DIV/0!	#DIV/0!	0	Spring	2011-10-16	1:30	Night
3871	000	3397	No	0	0	0	0	0	0	0	0	0	0	0	0	0	0	0	#DIV/0!	#DIV/0!	0	Spring	2011-10-16	8:00	Morning
3889	000	3415	No	0	0	0	0	0	0	0	0	0	0	0	0	0	0	0	#DIV/0!	#DIV/0!	0	Spring	2011-10-16	17:00	Afternoon
3897	000	3423	No	0	0	0	0	0	0	0	0	0	0	0	0	0	0	0	#DIV/0!	#DIV/0!	0	Spring	2011-10-16	21:00	Night
3906	000	3432	No	0	0	0	0	0	0	0	0	0	0	0	0	0	0	0	#DIV/0!	#DIV/0!	0	Spring	2011-10-17	1:30	Night
3921	000	3447	No	0	0	0	0	0	0	0	0	0	0	0	0	0	0	0	#DIV/0!	#DIV/0!	0	Spring	2011-10-17	9:00	Morning
3929	000	3455	No	0	0	0	0	0	0	0	0	0	0	0	0	0	0	0	#DIV/0!	#DIV/0!	0	Spring	2011-10-17	13:00	Morning
3951	000	3477	No	0	0	0	0	0	0	0	0	0	0	0	0	0	0	0	#DIV/0!	#DIV/0!	0	Spring	2011-10-18	0:00	Night
3957	000	3483	No	0	0	0	0	0	0	0	0	0	0	0	0	0	0	0	#DIV/0!	#DIV/0!	0	Spring	2011-10-18	3:00	Night
3960	000	3486	No	0	0	0	0	0	0	0	0	0	0	0	0	0	0	0	#DIV/0!	#DIV/0!	0	Spring	2011-10-18	4:30	Dawn
3961	000	3487	No	0	0	0	0	0	0	0	0	0	0	0	0	0	0	0	#DIV/0!	#DIV/0!	0	Spring	2011-10-18	5:00	Dawn
3967	000	3493	No	0	0	0	0	0	0	0	0	0	0	0	0	0	0	0	#DIV/0!	#DIV/0!	0	Spring	2011-10-18	8:00	Morning
3971	000	3497	No	0	0	0	0	0	0	0	0	0	0	0	0	0	0	0	#DIV/0!	#DIV/0!	0	Spring	2011-10-18	10:00	Morning
3988	000	3514	No	0	0	0	0	0	0	0	0	0	0	0	0	0	0	0	#DIV/0!	#DIV/0!	0	Spring	2011-10-18	18:30	Afternoon
3991	000	3517	No	0	0	0	0	0	0	0	0	0	0	0	0	0	0	0	#DIV/0!	#DIV/0!	0	Spring	2011-10-18	20:00	Dusk
4005	000	3531	No	0	0	0	0	0	0	0	0	0	0	0	0	0	0	0	#DIV/0!	#DIV/0!	0	Spring	2011-10-19	3:00	Night
4033	000	3559	No	0	0	0	0	0	0	0	0	0	0	0	0	0	0	0	#DIV/0!	#DIV/0!	0	Spring	2011-10-19	17:00	Afternoon
4034	000	3560	No	0	0	0	0	0	0	0	0	0	0	0	0	0	0	0	#DIV/0!	#DIV/0!	0	Spring	2011-10-19	17:30	Afternoon
4054	000	3580	No	0	0	0	0	0	0	0	0	0	0	0	0	0	0	0	#DIV/0!	#DIV/0!	0	Spring	2011-10-20	3:30	Night
4064	000	3590	No	0	0	0	0	0	0	0	0	0	0	0	0	0	0	0	#DIV/0!	#DIV/0!	0	Spring	2011-10-20	8:30	Morning
4083	000	3609	No	0	0	0	0	0	0	0	0	0	0	0	0	0	0	0	#DIV/0!	#DIV/0!	0	Spring	2011-10-20	18:00	Afternoon
4098	000	3624	No	0	0	0	0	0	0	0	0	0	0	0	0	0	0	0	#DIV/0!	#DIV/0!	0	Spring	2011-10-21	1:30	Night
4104	000	3630	No	0	0	0	0	0	0	0	0	0	0	0	0	0	0	0	#DIV/0!	#DIV/0!	0	Spring	2011-10-21	4:30	Dawn
4130	000	3656	No	0	0	0	0	0	0	0	0	0	0	0	0	0	0	0	#DIV/0!	#DIV/0!	0	Spring	2011-10-21	17:30	Afternoon
4140	000	3666	No	0	0	0	0	0	0	0	0	0	0	0	0	0	0	0	#DIV/0!	#DIV/0!	0	Spring	2011-10-21	22:30	Night
4154	000	3680	No	0	0	0	0	0	0	0	0	0	0	0	0	0	0	0	#DIV/0!	#DIV/0!	0	Spring	2011-10-22	5:30	Dawn
4356	000	3882	No	0	0	0	0	0	0	0	0	0	0	0	0	0	0	0	#DIV/0!	#DIV/0!	0	Spring	2011-10-26	10:30	Morning
4364	000	3890	No	0	0	0	0	0	0	0	0	0	0	0	0	0	0	0	#DIV/0!	#DIV/0!	0	Spring	2011-10-26	14:30	Afternoon
4455	000	3981	No	0	0	0	0	0	0	0	0	0	0	0	0	0	0	0	#DIV/0!	#DIV/0!	0	Spring	2011-10-28	12:00	Morning
4581	000	4107	No	0	0	0	0	0	0	0	0	0	0	0	0	0	0	0	#DIV/0!	#DIV/0!	0	Spring	2011-10-31	3:00	Night
4593	000	4119	No	0	0	0	0	0	0	0	0	0	0	0	0	0	0	0	#DIV/0!	#DIV/0!	0	Spring	2011-10-31	9:00	Morning
4619	000	4145	No	0	0	0	0	0	0	0	0	0	0	0	0	0	0	0	#DIV/0!	#DIV/0!	0	Spring	2011-10-31	22:00	Night
4620	000	4146	No	0	0	0	0	0	0	0	0	0	0	0	0	0	0	0	#DIV/0!	#DIV/0!	0	Spring	2011-10-31	22:30	Night
4686	000	4212	No	0	0	0	0	0	0	0	0	0	0	0	0	0	0	0	#DIV/0!	#DIV/0!	0	Spring	2011-11-02	7:30	Morning
4697	000	4223	No	0	0	0	0	0	0	0	0	0	0	0	0	0	0	0	#DIV/0!	#DIV/0!	0	Spring	2011-11-02	13:00	Afternoon
4699	000	4225	No	0	0	0	0	0	0	0	0	0	0	0	0	0	0	0	#DIV/0!	#DIV/0!	0	Spring	2011-11-02	14:00	Afternoon
4731	000	4257	No	0	0	0	0	0	0	0	0	0	0	0	0	0	0	0	#DIV/0!	#DIV/0!	0	Spring	2011-11-03	6:00	Morning
4732	000	4258	No	0	0	0	0	0	0	0	0	0	0	0	0	0	0	0	#DIV/0!	#DIV/0!	0	Spring	2011-11-03	6:30	Morning
4778	000	4304	No	0	0	0	0	0	0	0	0	0	0	0	0	0	0	0	#DIV/0!	#DIV/0!	0	Spring	2011-11-04	5:30	Morning
4782	000	4308	No	0	0	0	0	0	0	0	0	0	0	0	0	0	0	0	#DIV/0!	#DIV/0!	0	Spring	2011-11-04	7:30	Morning
4787	000	4313	No	0	0	0	0	0	0	0	0	0	0	0	0	0	0	0	#DIV/0!	#DIV/0!	0	Spring	2011-11-04	10:00	Morning
4794	000	4320	No	0	0	0	0	0	0	0	0	0	0	0	0	0	0	0	#DIV/0!	#DIV/0!	0	Spring	2011-11-04	13:30	Afternoon
4819	000	4345	No	0	0	0	0	0	0	0	0	0	0	0	0	0	0	0	#DIV/0!	#DIV/0!	0	Spring	2011-11-05	2:00	Night
4836	000	4362	No	0	0	0	0	0	0	0	0	0	0	0	0	0	0	0	#DIV/0!	#DIV/0!	0	Spring	2011-11-05	10:30	Morning
4846	000	4372	No	0	0	0	0	0	0	0	0	0	0	0	0	0	0	0	#DIV/0!	#DIV/0!	0	Spring	2011-11-05	15:30	Afternoon
4857	000	4383	No	0	0	0	0	0	0	0	0	0	0	0	0	0	0	0	#DIV/0!	#DIV/0!	0	Spring	2011-11-05	21:00	Dusk
4860	000	4386	No	0	0	0	0	0	0	0	0	0	0	0	0	0	0	0	#DIV/0!	#DIV/0!	0	Spring	2011-11-05	22:30	Night
4863	000	4389	No	0	0	0	0	0	0	0	0	0	0	0	0	0	0	0	#DIV/0!	#DIV/0!	0	Spring	2011-11-06	0:00	Night
4873	000	4399	No	0	0	0	0	0	0	0	0	0	0	0	0	0	0	0	#DIV/0!	#DIV/0!	0	Spring	2011-11-06	5:00	Dawn
4899	000	4425	No	0	0	0	0	0	0	0	0	0	0	0	0	0	0	0	#DIV/0!	#DIV/0!	0	Spring	2011-11-06	18:00	Afternoon
4905	000	4431	No	0	0	0	0	0	0	0	0	0	0	0	0	0	0	0	#DIV/0!	#DIV/0!	0	Spring	2011-11-06	21:00	Dusk
4907	000	4433	No	0	0	0	0	0	0	0	0	0	0	0	0	0	0	0	#DIV/0!	#DIV/0!	0	Spring	2011-11-06	22:00	Night
4925	000	4451	No	0	0	0	0	0	0	0	0	0	0	0	0	0	0	0	#DIV/0!	#DIV/0!	0	Spring	2011-11-07	7:00	Morning
4937	000	4463	No	0	0	0	0	0	0	0	0	0	0	0	0	0	0	0	#DIV/0!	#DIV/0!	0	Spring	2011-11-07	13:00	Morning
4960	000	4486	No	0	0	0	0	0	0	0	0	0	0	0	0	0	0	0	#DIV/0!	#DIV/0!	0	Spring	2011-11-08	0:30	Night
4994	000	4520	No	0	0	0	0	0	0	0	0	0	0	0	0	0	0	0	#DIV/0!	#DIV/0!	0	Spring	2011-11-08	17:30	Afternoon
4999	000	4525	No	0	0	0	0	0	0	0	0	0	0	0	0	0	0	0	#DIV/0!	#DIV/0!	0	Spring	2011-11-08	20:00	Afternoon
5009	000	4535	No	0	0	0	0	0	0	0	0	0	0	0	0	0	0	0	#DIV/0!	#DIV/0!	0	Spring	2011-11-09	1:00	Night
5026	000	4552	No	0	0	0	0	0	0	0	0	0	0	0	0	0	0	0	#DIV/0!	#DIV/0!	0	Spring	2011-11-09	9:30	Morning
5031	000	4557	No	0	0	0	0	0	0	0	0	0	0	0	0	0	0	0	#DIV/0!	#DIV/0!	0	Spring	2011-11-09	12:00	Morning
5046	000	4572	No	0	0	0	0	0	0	0	0	0	0	0	0	0	0	0	#DIV/0!	#DIV/0!	0	Spring	2011-11-09	19:30	Afternoon
5062	000	4588	No	0	0	0	0	0	0	0	0	0	0	0	0	0	0	0	#DIV/0!	#DIV/0!	0	Spring	2011-11-10	3:30	Night
5085	000	4611	No	0	0	0	0	0	0	0	0	0	0	0	0	0	0	0	#DIV/0!	#DIV/0!	0	Spring	2011-11-10	15:00	Afternoon
5100	000	4626	No	0	0	0	0	0	0	0	0	0	0	0	0	0	0	0	#DIV/0!	#DIV/0!	0	Spring	2011-11-10	22:30	Night
5119	000	4645	No	0	0	0	0	0	0	0	0	0	0	0	0	0	0	0	#DIV/0!	#DIV/0!	0	Spring	2011-11-11	8:00	Morning
5166	000	4692	No	0	0	0	0	0	0	0	0	0	0	0	0	0	0	0	#DIV/0!	#DIV/0!	0	Spring	2011-11-12	7:30	Morning
5175	000	4701	No	0	0	0	0	0	0	0	0	0	0	0	0	0	0	0	#DIV/0!	#DIV/0!	0	Spring	2011-11-12	12:00	Morning
5178	000	4704	No	0	0	0	0	0	0	0	0	0	0	0	0	0	0	0	#DIV/0!	#DIV/0!	0	Spring	2011-11-12	13:30	Afternoon
5191	000	4717	No	0	0	0	0	0	0	0	0	0	0	0	0	0	0	0	#DIV/0!	#DIV/0!	0	Spring	2011-11-12	20:00	Afternoon
5202	000	4728	No	0	0	0	0	0	0	0	0	0	0	0	0	0	0	0	#DIV/0!	#DIV/0!	0	Spring	2011-11-13	1:30	Night
5230	000	4756	No	0	0	0	0	0	0	0	0	0	0	0	0	0	0	0	#DIV/0!	#DIV/0!	0	Spring	2011-11-13	15:30	Afternoon
5236	000	4762	No	0	0	0	0	0	0	0	0	0	0	0	0	0	0	0	#DIV/0!	#DIV/0!	0	Spring	2011-11-13	18:30	Afternoon
5258	000	4784	No	0	0	0	0	0	0	0	0	0	0	0	0	0	0	0	#DIV/0!	#DIV/0!	0	Spring	2011-11-14	5:30	Morning
5274	000	4800	No	0	0	0	0	0	0	0	0	0	0	0	0	0	0	0	#DIV/0!	#DIV/0!	0	Spring	2011-11-14	13:30	Afternoon
5282	000	4808	No	0	0	0	0	0	0	0	0	0	0	0	0	0	0	0	#DIV/0!	#DIV/0!	0	Spring	2011-11-14	17:30	Afternoon
5295	000	4821	No	0	0	0	0	0	0	0	0	0	0	0	0	0	0	0	#DIV/0!	#DIV/0!	0	Spring	2011-11-15	0:00	Night
5304	000	4830	No	0	0	0	0	0	0	0	0	0	0	0	0	0	0	0	#DIV/0!	#DIV/0!	0	Spring	2011-11-15	4:30	Dawn
5328	000	4854	No	0	0	0	0	0	0	0	0	0	0	0	0	0	0	0	#DIV/0!	#DIV/0!	0	Spring	2011-11-15	16:30	Afternoon
5345	000	4871	No	0	0	0	0	0	0	0	0	0	0	0	0	0	0	0	#DIV/0!	#DIV/0!	0	Spring	2011-11-16	1:00	Night
5349	000	4875	No	0	0	0	0	0	0	0	0	0	0	0	0	0	0	0	#DIV/0!	#DIV/0!	0	Spring	2011-11-16	3:00	Night
5366	000	4892	No	0	0	0	0	0	0	0	0	0	0	0	0	0	0	0	#DIV/0!	#DIV/0!	0	Spring	2011-11-16	11:30	Morning
5368	000	4894	No	0	0	0	0	0	0	0	0	0	0	0	0	0	0	0	#DIV/0!	#DIV/0!	0	Spring	2011-11-16	12:30	Morning
5372	000	4898	No	0	0	0	0	0	0	0	0	0	0	0	0	0	0	0	#DIV/0!	#DIV/0!	0	Spring	2011-11-16	14:30	Afternoon
5381	000	4907	No	0	0	0	0	0	0	0	0	0	0	0	0	0	0	0	#DIV/0!	#DIV/0!	0	Spring	2011-11-16	19:00	Afternoon
5387	000	4913	No	0	0	0	0	0	0	0	0	0	0	0	0	0	0	0	#DIV/0!	#DIV/0!	0	Spring	2011-11-16	22:00	Night
5410	000	4936	No	0	0	0	0	0	0	0	0	0	0	0	0	0	0	0	#DIV/0!	#DIV/0!	0	Spring	2011-11-17	9:30	Morning
5412	000	4938	No	0	0	0	0	0	0	0	0	0	0	0	0	0	0	0	#DIV/0!	#DIV/0!	0	Spring	2011-11-17	10:30	Morning
5456	000	4982	No	0	0	0	0	0	0	0	0	0	0	0	0	0	0	0	#DIV/0!	#DIV/0!	0	Spring	2011-11-18	8:30	Morning
5461	000	4987	No	0	0	0	0	0	0	0	0	0	0	0	0	0	0	0	#DIV/0!	#DIV/0!	0	Spring	2011-11-18	11:00	Morning
5489	000	5015	No	0	0	0	0	0	0	0	0	0	0	0	0	0	0	0	#DIV/0!	#DIV/0!	0	Spring	2011-11-19	1:00	Night
5492	000	5018	No	0	0	0	0	0	0	0	0	0	0	0	0	0	0	0	#DIV/0!	#DIV/0!	0	Spring	2011-11-19	2:30	Night
5503	000	5029	No	0	0	0	0	0	0	0	0	0	0	0	0	0	0	0	#DIV/0!	#DIV/0!	0	Spring	2011-11-19	8:00	Morning
5509	000	5035	No	0	0	0	0	0	0	0	0	0	0	0	0	0	0	0	#DIV/0!	#DIV/0!	0	Spring	2011-11-19	11:00	Morning
5514	000	5040	No	0	0	0	0	0	0	0	0	0	0	0	0	0	0	0	#DIV/0!	#DIV/0!	0	Spring	2011-11-19	13:30	Afternoon
5518	000	5044	No	0	0	0	0	0	0	0	0	0	0	0	0	0	0	0	#DIV/0!	#DIV/0!	0	Spring	2011-11-19	15:30	Afternoon
5520	000	5046	No	0	0	0	0	0	0	0	0	0	0	0	0	0	0	0	#DIV/0!	#DIV/0!	0	Spring	2011-11-19	16:30	Afternoon
5521	000	5047	No	0	0	0	0	0	0	0	0	0	0	0	0	0	0	0	#DIV/0!	#DIV/0!	0	Spring	2011-11-19	17:00	Afternoon
5539	000	5065	No	0	0	0	0	0	0	0	0	0	0	0	0	0	0	0	#DIV/0!	#DIV/0!	0	Spring	2011-11-20	2:00	Night
5540	000	5066	No	0	0	0	0	0	0	0	0	0	0	0	0	0	0	0	#DIV/0!	#DIV/0!	0	Spring	2011-11-20	2:30	Night
5562	000	5088	No	0	0	0	0	0	0	0	0	0	0	0	0	0	0	0	#DIV/0!	#DIV/0!	0	Spring	2011-11-20	13:30	Afternoon
5565	000	5091	No	0	0	0	0	0	0	0	0	0	0	0	0	0	0	0	#DIV/0!	#DIV/0!	0	Spring	2011-11-20	15:00	Afternoon
5577	000	5103	No	0	0	0	0	0	0	0	0	0	0	0	0	0	0	0	#DIV/0!	#DIV/0!	0	Spring	2011-11-20	21:00	Dusk
5580	000	5106	No	0	0	0	0	0	0	0	0	0	0	0	0	0	0	0	#DIV/0!	#DIV/0!	0	Spring	2011-11-20	22:30	Night
5588	000	5114	No	0	0	0	0	0	0	0	0	0	0	0	0	0	0	0	#DIV/0!	#DIV/0!	0	Spring	2011-11-21	2:30	Night
5626	000	5152	No	0	0	0	0	0	0	0	0	0	0	0	0	0	0	0	#DIV/0!	#DIV/0!	0	Spring	2011-11-21	21:30	Dusk
5690	000	5216	No	0	0	0	0	0	0	0	0	0	0	0	0	0	0	0	#DIV/0!	#DIV/0!	0	Spring	2011-11-23	5:30	Morning
5693	000	5219	No	0	0	0	0	0	0	0	0	0	0	0	0	0	0	0	#DIV/0!	#DIV/0!	0	Spring	2011-11-23	7:00	Morning
5723	000	5249	No	0	0	0	0	0	0	0	0	0	0	0	0	0	0	0	#DIV/0!	#DIV/0!	0	Spring	2011-11-23	22:00	Dusk
5761	000	5287	No	0	0	0	0	0	0	0	0	0	0	0	0	0	0	0	#DIV/0!	#DIV/0!	0	Spring	2011-11-24	17:00	Afternoon
5788	000	5314	No	0	0	0	0	0	0	0	0	0	0	0	0	0	0	0	#DIV/0!	#DIV/0!	0	Spring	2011-11-25	6:30	Morning
5806	000	5332	No	0	0	0	0	0	0	0	0	0	0	0	0	0	0	0	#DIV/0!	#DIV/0!	0	Spring	2011-11-25	15:30	Afternoon
5807	000	5333	No	0	0	0	0	0	0	0	0	0	0	0	0	0	0	0	#DIV/0!	#DIV/0!	0	Spring	2011-11-25	16:00	Afternoon
5815	000	5341	No	0	0	0	0	0	0	0	0	0	0	0	0	0	0	0	#DIV/0!	#DIV/0!	0	Spring	2011-11-25	20:00	Afternoon
5818	000	5344	No	0	0	0	0	0	0	0	0	0	0	0	0	0	0	0	#DIV/0!	#DIV/0!	0	Spring	2011-11-25	21:30	Dusk
5819	000	5345	No	0	0	0	0	0	0	0	0	0	0	0	0	0	0	0	#DIV/0!	#DIV/0!	0	Spring	2011-11-25	22:00	Dusk
5823	000	5349	No	0	0	0	0	0	0	0	0	0	0	0	0	0	0	0	#DIV/0!	#DIV/0!	0	Spring	2011-11-26	0:00	Night
5826	000	5352	No	0	0	0	0	0	0	0	0	0	0	0	0	0	0	0	#DIV/0!	#DIV/0!	0	Spring	2011-11-26	1:30	Night
5859	000	5385	No	0	0	0	0	0	0	0	0	0	0	0	0	0	0	0	#DIV/0!	#DIV/0!	0	Spring	2011-11-26	18:00	Afternoon
5879	000	5405	No	0	0	0	0	0	0	0	0	0	0	0	0	0	0	0	#DIV/0!	#DIV/0!	0	Spring	2011-11-27	4:00	Dawn
5884	000	5410	No	0	0	0	0	0	0	0	0	0	0	0	0	0	0	0	#DIV/0!	#DIV/0!	0	Spring	2011-11-27	6:30	Morning
5897	000	5423	No	0	0	0	0	0	0	0	0	0	0	0	0	0	0	0	#DIV/0!	#DIV/0!	0	Spring	2011-11-27	13:00	Afternoon
5899	000	5425	No	0	0	0	0	0	0	0	0	0	0	0	0	0	0	0	#DIV/0!	#DIV/0!	0	Spring	2011-11-27	14:00	Afternoon
5902	000	5428	No	0	0	0	0	0	0	0	0	0	0	0	0	0	0	0	#DIV/0!	#DIV/0!	0	Spring	2011-11-27	15:30	Afternoon
5903	000	5429	No	0	0	0	0	0	0	0	0	0	0	0	0	0	0	0	#DIV/0!	#DIV/0!	0	Spring	2011-11-27	16:00	Afternoon
5923	000	5449	No	0	0	0	0	0	0	0	0	0	0	0	0	0	0	0	#DIV/0!	#DIV/0!	0	Spring	2011-11-28	2:00	Night
5924	000	5450	No	0	0	0	0	0	0	0	0	0	0	0	0	0	0	0	#DIV/0!	#DIV/0!	0	Spring	2011-11-28	2:30	Night
5971	000	5497	No	0	0	0	0	0	0	0	0	0	0	0	0	0	0	0	#DIV/0!	#DIV/0!	0	Spring	2011-11-29	2:00	Night
5995	000	5521	No	0	0	0	0	0	0	0	0	0	0	0	0	0	0	0	#DIV/0!	#DIV/0!	0	Spring	2011-11-29	14:00	Afternoon
5996	000	5522	No	0	0	0	0	0	0	0	0	0	0	0	0	0	0	0	#DIV/0!	#DIV/0!	0	Spring	2011-11-29	14:30	Afternoon
6000	000	5526	No	0	0	0	0	0	0	0	0	0	0	0	0	0	0	0	#DIV/0!	#DIV/0!	0	Spring	2011-11-29	16:30	Afternoon
6008	000	5534	No	0	0	0	0	0	0	0	0	0	0	0	0	0	0	0	#DIV/0!	#DIV/0!	0	Spring	2011-11-29	20:30	Afternoon
6027	000	5553	No	0	0	0	0	0	0	0	0	0	0	0	0	0	0	0	#DIV/0!	#DIV/0!	0	Spring	2011-11-30	6:00	Morning
6095	000	5621	No	0	0	0	0	0	0	0	0	0	0	0	0	0	0	0	#DIV/0!	#DIV/0!	0	Summer	2011-12-01	16:00	Afternoon
6101	000	5627	No	0	0	0	0	0	0	0	0	0	0	0	0	0	0	0	#DIV/0!	#DIV/0!	0	Summer	2011-12-01	19:00	Afternoon
6112	000	5638	No	0	0	0	0	0	0	0	0	0	0	0	0	0	0	0	#DIV/0!	#DIV/0!	0	Summer	2011-12-02	0:30	Night
6113	000	5639	No	0	0	0	0	0	0	0	0	0	0	0	0	0	0	0	#DIV/0!	#DIV/0!	0	Summer	2011-12-02	1:00	Night
6114	000	5640	No	0	0	0	0	0	0	0	0	0	0	0	0	0	0	0	#DIV/0!	#DIV/0!	0	Summer	2011-12-02	1:30	Night
6119	000	5645	No	0	0	0	0	0	0	0	0	0	0	0	0	0	0	0	#DIV/0!	#DIV/0!	0	Summer	2011-12-02	4:00	Dawn
6136	000	5662	No	0	0	0	0	0	0	0	0	0	0	0	0	0	0	0	#DIV/0!	#DIV/0!	0	Summer	2011-12-02	12:30	Morning
6144	000	5670	No	0	0	0	0	0	0	0	0	0	0	0	0	0	0	0	#DIV/0!	#DIV/0!	0	Summer	2011-12-02	16:30	Afternoon
6146	000	5672	No	0	0	0	0	0	0	0	0	0	0	0	0	0	0	0	#DIV/0!	#DIV/0!	0	Summer	2011-12-02	17:30	Afternoon
6150	000	5676	No	0	0	0	0	0	0	0	0	0	0	0	0	0	0	0	#DIV/0!	#DIV/0!	0	Summer	2011-12-02	19:30	Afternoon
6157	000	5683	No	0	0	0	0	0	0	0	0	0	0	0	0	0	0	0	#DIV/0!	#DIV/0!	0	Summer	2011-12-02	23:00	Night
6163	000	5689	No	0	0	0	0	0	0	0	0	0	0	0	0	0	0	0	#DIV/0!	#DIV/0!	0	Summer	2011-12-03	2:00	Night
6166	000	5692	No	0	0	0	0	0	0	0	0	0	0	0	0	0	0	0	#DIV/0!	#DIV/0!	0	Summer	2011-12-03	3:30	Dawn
6173	000	5699	No	0	0	0	0	0	0	0	0	0	0	0	0	0	0	0	#DIV/0!	#DIV/0!	0	Summer	2011-12-03	7:00	Morning
6180	000	5706	No	0	0	0	0	0	0	0	0	0	0	0	0	0	0	0	#DIV/0!	#DIV/0!	0	Summer	2011-12-03	10:30	Morning
6199	000	5725	No	0	0	0	0	0	0	0	0	0	0	0	0	0	0	0	#DIV/0!	#DIV/0!	0	Summer	2011-12-03	20:00	Afternoon
6210	000	5736	No	0	0	0	0	0	0	0	0	0	0	0	0	0	0	0	#DIV/0!	#DIV/0!	0	Summer	2011-12-04	1:30	Night
6221	000	5747	No	0	0	0	0	0	0	0	0	0	0	0	0	0	0	0	#DIV/0!	#DIV/0!	0	Summer	2011-12-04	7:00	Morning
6243	000	5769	No	0	0	0	0	0	0	0	0	0	0	0	0	0	0	0	#DIV/0!	#DIV/0!	0	Summer	2011-12-04	18:00	Afternoon
6257	000	5783	No	0	0	0	0	0	0	0	0	0	0	0	0	0	0	0	#DIV/0!	#DIV/0!	0	Summer	2011-12-05	1:00	Night
6265	000	5791	No	0	0	0	0	0	0	0	0	0	0	0	0	0	0	0	#DIV/0!	#DIV/0!	0	Summer	2011-12-05	5:00	Morning
6272	000	5798	No	0	0	0	0	0	0	0	0	0	0	0	0	0	0	0	#DIV/0!	#DIV/0!	0	Summer	2011-12-05	8:30	Morning
6283	000	5809	No	0	0	0	0	0	0	0	0	0	0	0	0	0	0	0	#DIV/0!	#DIV/0!	0	Summer	2011-12-05	14:00	Afternoon
6284	000	5810	No	0	0	0	0	0	0	0	0	0	0	0	0	0	0	0	#DIV/0!	#DIV/0!	0	Summer	2011-12-05	14:30	Afternoon
6285	000	5811	No	0	0	0	0	0	0	0	0	0	0	0	0	0	0	0	#DIV/0!	#DIV/0!	0	Summer	2011-12-05	15:00	Afternoon
6306	000	5832	No	0	0	0	0	0	0	0	0	0	0	0	0	0	0	0	#DIV/0!	#DIV/0!	0	Summer	2011-12-06	1:30	Night
6307	000	5833	No	0	0	0	0	0	0	0	0	0	0	0	0	0	0	0	#DIV/0!	#DIV/0!	0	Summer	2011-12-06	2:00	Night
6310	000	5836	No	0	0	0	0	0	0	0	0	0	0	0	0	0	0	0	#DIV/0!	#DIV/0!	0	Summer	2011-12-06	3:30	Dawn
6318	000	5844	No	0	0	0	0	0	0	0	0	0	0	0	0	0	0	0	#DIV/0!	#DIV/0!	0	Summer	2011-12-06	7:30	Morning
6320	000	5846	No	0	0	0	0	0	0	0	0	0	0	0	0	0	0	0	#DIV/0!	#DIV/0!	0	Summer	2011-12-06	8:30	Morning
6323	000	5849	No	0	0	0	0	0	0	0	0	0	0	0	0	0	0	0	#DIV/0!	#DIV/0!	0	Summer	2011-12-06	10:00	Morning
6325	000	5851	No	0	0	0	0	0	0	0	0	0	0	0	0	0	0	0	#DIV/0!	#DIV/0!	0	Summer	2011-12-06	11:00	Morning
6354	000	5880	No	0	0	0	0	0	0	0	0	0	0	0	0	0	0	0	#DIV/0!	#DIV/0!	0	Summer	2011-12-07	1:30	Night
6356	000	5882	No	0	0	0	0	0	0	0	0	0	0	0	0	0	0	0	#DIV/0!	#DIV/0!	0	Summer	2011-12-07	2:30	Night
6368	000	5894	No	0	0	0	0	0	0	0	0	0	0	0	0	0	0	0	#DIV/0!	#DIV/0!	0	Summer	2011-12-07	8:30	Morning
6370	000	5896	No	0	0	0	0	0	0	0	0	0	0	0	0	0	0	0	#DIV/0!	#DIV/0!	0	Summer	2011-12-07	9:30	Morning
6381	000	5907	No	0	0	0	0	0	0	0	0	0	0	0	0	0	0	0	#DIV/0!	#DIV/0!	0	Summer	2011-12-07	15:00	Afternoon
6385	000	5911	No	0	0	0	0	0	0	0	0	0	0	0	0	0	0	0	#DIV/0!	#DIV/0!	0	Summer	2011-12-07	17:00	Afternoon
6399	000	5925	No	0	0	0	0	0	0	0	0	0	0	0	0	0	0	0	#DIV/0!	#DIV/0!	0	Summer	2011-12-08	0:00	Night
6410	000	5936	No	0	0	0	0	0	0	0	0	0	0	0	0	0	0	0	#DIV/0!	#DIV/0!	0	Summer	2011-12-08	5:30	Morning
6415	000	5941	No	0	0	0	0	0	0	0	0	0	0	0	0	0	0	0	#DIV/0!	#DIV/0!	0	Summer	2011-12-08	8:00	Morning
6421	000	5947	No	0	0	0	0	0	0	0	0	0	0	0	0	0	0	0	#DIV/0!	#DIV/0!	0	Summer	2011-12-08	11:00	Morning
6426	000	5952	No	0	0	0	0	0	0	0	0	0	0	0	0	0	0	0	#DIV/0!	#DIV/0!	0	Summer	2011-12-08	13:30	Afternoon
6455	000	5981	No	0	0	0	0	0	0	0	0	0	0	0	0	0	0	0	#DIV/0!	#DIV/0!	0	Summer	2011-12-09	4:00	Dawn
6475	000	6001	No	0	0	0	0	0	0	0	0	0	0	0	0	0	0	0	#DIV/0!	#DIV/0!	0	Summer	2011-12-09	14:00	Afternoon
6477	000	6003	No	0	0	0	0	0	0	0	0	0	0	0	0	0	0	0	#DIV/0!	#DIV/0!	0	Summer	2011-12-09	15:00	Afternoon
6481	000	6007	No	0	0	0	0	0	0	0	0	0	0	0	0	0	0	0	#DIV/0!	#DIV/0!	0	Summer	2011-12-09	17:00	Afternoon
6487	000	6013	No	0	0	0	0	0	0	0	0	0	0	0	0	0	0	0	#DIV/0!	#DIV/0!	0	Summer	2011-12-09	20:00	Afternoon
6497	000	6023	No	0	0	0	0	0	0	0	0	0	0	0	0	0	0	0	#DIV/0!	#DIV/0!	0	Summer	2011-12-10	1:00	Night
6519	000	6045	No	0	0	0	0	0	0	0	0	0	0	0	0	0	0	0	#DIV/0!	#DIV/0!	0	Summer	2011-12-10	12:00	Morning
6535	000	6061	No	0	0	0	0	0	0	0	0	0	0	0	0	0	0	0	#DIV/0!	#DIV/0!	0	Summer	2011-12-10	20:00	Afternoon
6544	000	6070	No	0	0	0	0	0	0	0	0	0	0	0	0	0	0	0	#DIV/0!	#DIV/0!	0	Summer	2011-12-11	0:30	Night
6551	000	6077	No	0	0	0	0	0	0	0	0	0	0	0	0	0	0	0	#DIV/0!	#DIV/0!	0	Summer	2011-12-11	4:00	Dawn
6554	000	6080	No	0	0	0	0	0	0	0	0	0	0	0	0	0	0	0	#DIV/0!	#DIV/0!	0	Summer	2011-12-11	5:30	Morning
6566	000	6092	No	0	0	0	0	0	0	0	0	0	0	0	0	0	0	0	#DIV/0!	#DIV/0!	0	Summer	2011-12-11	11:30	Morning
6574	000	6100	No	0	0	0	0	0	0	0	0	0	0	0	0	0	0	0	#DIV/0!	#DIV/0!	0	Summer	2011-12-11	15:30	Afternoon
6590	000	6116	No	0	0	0	0	0	0	0	0	0	0	0	0	0	0	0	#DIV/0!	#DIV/0!	0	Summer	2011-12-11	23:30	Night
6593	000	6119	No	0	0	0	0	0	0	0	0	0	0	0	0	0	0	0	#DIV/0!	#DIV/0!	0	Summer	2011-12-12	1:00	Night
6595	000	6121	No	0	0	0	0	0	0	0	0	0	0	0	0	0	0	0	#DIV/0!	#DIV/0!	0	Summer	2011-12-12	2:00	Night
6646	000	6172	No	0	0	0	0	0	0	0	0	0	0	0	0	0	0	0	#DIV/0!	#DIV/0!	0	Summer	2011-12-13	3:30	Dawn
6662	000	6188	No	0	0	0	0	0	0	0	0	0	0	0	0	0	0	0	#DIV/0!	#DIV/0!	0	Summer	2011-12-13	11:30	Morning
6676	000	6202	No	0	0	0	0	0	0	0	0	0	0	0	0	0	0	0	#DIV/0!	#DIV/0!	0	Summer	2011-12-13	18:30	Afternoon
6699	000	6225	No	0	0	0	0	0	0	0	0	0	0	0	0	0	0	0	#DIV/0!	#DIV/0!	0	Summer	2011-12-14	6:00	Morning
6706	000	6232	No	0	0	0	0	0	0	0	0	0	0	0	0	0	0	0	#DIV/0!	#DIV/0!	0	Summer	2011-12-14	9:30	Morning
6707	000	6233	No	0	0	0	0	0	0	0	0	0	0	0	0	0	0	0	#DIV/0!	#DIV/0!	0	Summer	2011-12-14	10:00	Morning
6714	000	6240	No	0	0	0	0	0	0	0	0	0	0	0	0	0	0	0	#DIV/0!	#DIV/0!	0	Summer	2011-12-14	13:30	Afternoon
6716	000	6242	No	0	0	0	0	0	0	0	0	0	0	0	0	0	0	0	#DIV/0!	#DIV/0!	0	Summer	2011-12-14	14:30	Afternoon
6721	000	6247	No	0	0	0	0	0	0	0	0	0	0	0	0	0	0	0	#DIV/0!	#DIV/0!	0	Summer	2011-12-14	17:00	Afternoon
6726	000	6252	No	0	0	0	0	0	0	0	0	0	0	0	0	0	0	0	#DIV/0!	#DIV/0!	0	Summer	2011-12-14	19:30	Afternoon
6736	000	6262	No	0	0	0	0	0	0	0	0	0	0	0	0	0	0	0	#DIV/0!	#DIV/0!	0	Summer	2011-12-15	0:30	Night
6747	000	6273	No	0	0	0	0	0	0	0	0	0	0	0	0	0	0	0	#DIV/0!	#DIV/0!	0	Summer	2011-12-15	6:00	Morning
6748	000	6274	No	0	0	0	0	0	0	0	0	0	0	0	0	0	0	0	#DIV/0!	#DIV/0!	0	Summer	2011-12-15	6:30	Morning
6758	000	6284	No	0	0	0	0	0	0	0	0	0	0	0	0	0	0	0	#DIV/0!	#DIV/0!	0	Summer	2011-12-15	11:30	Morning
6760	000	6286	No	0	0	0	0	0	0	0	0	0	0	0	0	0	0	0	#DIV/0!	#DIV/0!	0	Summer	2011-12-15	12:30	Morning
6779	000	6305	No	0	0	0	0	0	0	0	0	0	0	0	0	0	0	0	#DIV/0!	#DIV/0!	0	Summer	2011-12-15	22:00	Dusk
6780	000	6306	No	0	0	0	0	0	0	0	0	0	0	0	0	0	0	0	#DIV/0!	#DIV/0!	0	Summer	2011-12-15	22:30	Dusk
6787	000	6313	No	0	0	0	0	0	0	0	0	0	0	0	0	0	0	0	#DIV/0!	#DIV/0!	0	Summer	2011-12-16	2:00	Night
6823	000	6349	No	0	0	0	0	0	0	0	0	0	0	0	0	0	0	0	#DIV/0!	#DIV/0!	0	Summer	2011-12-16	20:00	Afternoon
6824	000	6350	No	0	0	0	0	0	0	0	0	0	0	0	0	0	0	0	#DIV/0!	#DIV/0!	0	Summer	2011-12-16	20:30	Afternoon
6826	000	6352	No	0	0	0	0	0	0	0	0	0	0	0	0	0	0	0	#DIV/0!	#DIV/0!	0	Summer	2011-12-16	21:30	Dusk
6836	000	6362	No	0	0	0	0	0	0	0	0	0	0	0	0	0	0	0	#DIV/0!	#DIV/0!	0	Summer	2011-12-17	2:30	Night
6855	000	6381	No	0	0	0	0	0	0	0	0	0	0	0	0	0	0	0	#DIV/0!	#DIV/0!	0	Summer	2011-12-17	12:00	Morning
6868	000	6394	No	0	0	0	0	0	0	0	0	0	0	0	0	0	0	0	#DIV/0!	#DIV/0!	0	Summer	2011-12-17	18:30	Afternoon
6873	000	6399	No	0	0	0	0	0	0	0	0	0	0	0	0	0	0	0	#DIV/0!	#DIV/0!	0	Summer	2011-12-17	21:00	Afternoon
6892	000	6418	No	0	0	0	0	0	0	0	0	0	0	0	0	0	0	0	#DIV/0!	#DIV/0!	0	Summer	2011-12-18	6:30	Morning
6893	000	6419	No	0	0	0	0	0	0	0	0	0	0	0	0	0	0	0	#DIV/0!	#DIV/0!	0	Summer	2011-12-18	7:00	Morning
6898	000	6424	No	0	0	0	0	0	0	0	0	0	0	0	0	0	0	0	#DIV/0!	#DIV/0!	0	Summer	2011-12-18	9:30	Morning
6905	000	6431	No	0	0	0	0	0	0	0	0	0	0	0	0	0	0	0	#DIV/0!	#DIV/0!	0	Summer	2011-12-18	13:00	Afternoon
6913	000	6439	No	0	0	0	0	0	0	0	0	0	0	0	0	0	0	0	#DIV/0!	#DIV/0!	0	Summer	2011-12-18	17:00	Afternoon
6914	000	6440	No	0	0	0	0	0	0	0	0	0	0	0	0	0	0	0	#DIV/0!	#DIV/0!	0	Summer	2011-12-18	17:30	Afternoon
6929	000	6455	No	0	0	0	0	0	0	0	0	0	0	0	0	0	0	0	#DIV/0!	#DIV/0!	0	Summer	2011-12-19	1:00	Night
6941	000	6467	No	0	0	0	0	0	0	0	0	0	0	0	0	0	0	0	#DIV/0!	#DIV/0!	0	Summer	2011-12-19	7:00	Morning
6950	000	6476	No	0	0	0	0	0	0	0	0	0	0	0	0	0	0	0	#DIV/0!	#DIV/0!	0	Summer	2011-12-19	11:30	Morning
6956	000	6482	No	0	0	0	0	0	0	0	0	0	0	0	0	0	0	0	#DIV/0!	#DIV/0!	0	Summer	2011-12-19	14:30	Afternoon
6977	000	6503	No	0	0	0	0	0	0	0	0	0	0	0	0	0	0	0	#DIV/0!	#DIV/0!	0	Summer	2011-12-20	1:00	Night
6982	000	6508	No	0	0	0	0	0	0	0	0	0	0	0	0	0	0	0	#DIV/0!	#DIV/0!	0	Summer	2011-12-20	3:30	Dawn
7009	000	6535	No	0	0	0	0	0	0	0	0	0	0	0	0	0	0	0	#DIV/0!	#DIV/0!	0	Summer	2011-12-20	17:00	Afternoon
7020	000	6546	No	0	0	0	0	0	0	0	0	0	0	0	0	0	0	0	#DIV/0!	#DIV/0!	0	Summer	2011-12-20	22:30	Dusk
7026	000	6552	No	0	0	0	0	0	0	0	0	0	0	0	0	0	0	0	#DIV/0!	#DIV/0!	0	Summer	2011-12-21	1:30	Night
7041	000	6567	No	0	0	0	0	0	0	0	0	0	0	0	0	0	0	0	#DIV/0!	#DIV/0!	0	Summer	2011-12-21	9:00	Morning
7042	000	6568	No	0	0	0	0	0	0	0	0	0	0	0	0	0	0	0	#DIV/0!	#DIV/0!	0	Summer	2011-12-21	9:30	Morning
7053	000	6579	No	0	0	0	0	0	0	0	0	0	0	0	0	0	0	0	#DIV/0!	#DIV/0!	0	Summer	2011-12-21	15:00	Afternoon
7056	000	6582	No	0	0	0	0	0	0	0	0	0	0	0	0	0	0	0	#DIV/0!	#DIV/0!	0	Summer	2011-12-21	16:30	Afternoon
7061	000	6587	No	0	0	0	0	0	0	0	0	0	0	0	0	0	0	0	#DIV/0!	#DIV/0!	0	Summer	2011-12-21	19:00	Afternoon
7064	000	6590	No	0	0	0	0	0	0	0	0	0	0	0	0	0	0	0	#DIV/0!	#DIV/0!	0	Summer	2011-12-21	20:30	Afternoon
7066	000	6592	No	0	0	0	0	0	0	0	0	0	0	0	0	0	0	0	#DIV/0!	#DIV/0!	0	Summer	2011-12-21	21:30	Dusk
7067	000	6593	No	0	0	0	0	0	0	0	0	0	0	0	0	0	0	0	#DIV/0!	#DIV/0!	0	Summer	2011-12-21	22:00	Dusk
7094	000	6620	No	0	0	0	0	0	0	0	0	0	0	0	0	0	0	0	#DIV/0!	#DIV/0!	0	Summer	2011-12-22	11:30	Morning
7106	000	6632	No	0	0	0	0	0	0	0	0	0	0	0	0	0	0	0	#DIV/0!	#DIV/0!	0	Summer	2011-12-22	17:30	Afternoon
7118	000	6644	No	0	0	0	0	0	0	0	0	0	0	0	0	0	0	0	#DIV/0!	#DIV/0!	0	Summer	2011-12-22	23:30	Night
7124	000	6650	No	0	0	0	0	0	0	0	0	0	0	0	0	0	0	0	#DIV/0!	#DIV/0!	0	Summer	2011-12-23	2:30	Night
7131	000	6657	No	0	0	0	0	0	0	0	0	0	0	0	0	0	0	0	#DIV/0!	#DIV/0!	0	Summer	2011-12-23	6:00	Morning
7132	000	6658	No	0	0	0	0	0	0	0	0	0	0	0	0	0	0	0	#DIV/0!	#DIV/0!	0	Summer	2011-12-23	6:30	Morning
7149	000	6675	No	0	0	0	0	0	0	0	0	0	0	0	0	0	0	0	#DIV/0!	#DIV/0!	0	Summer	2011-12-23	15:00	Afternoon
7150	000	6676	No	0	0	0	0	0	0	0	0	0	0	0	0	0	0	0	#DIV/0!	#DIV/0!	0	Summer	2011-12-23	15:30	Afternoon
7151	000	6677	No	0	0	0	0	0	0	0	0	0	0	0	0	0	0	0	#DIV/0!	#DIV/0!	0	Summer	2011-12-23	16:00	Afternoon
7163	000	6689	No	0	0	0	0	0	0	0	0	0	0	0	0	0	0	0	#DIV/0!	#DIV/0!	0	Summer	2011-12-23	22:00	Dusk
7203	000	6729	No	0	0	0	0	0	0	0	0	0	0	0	0	0	0	0	#DIV/0!	#DIV/0!	0	Summer	2011-12-24	18:00	Afternoon
7209	000	6735	No	0	0	0	0	0	0	0	0	0	0	0	0	0	0	0	#DIV/0!	#DIV/0!	0	Summer	2011-12-24	21:00	Afternoon
7222	000	6748	No	0	0	0	0	0	0	0	0	0	0	0	0	0	0	0	#DIV/0!	#DIV/0!	0	Summer	2011-12-25	3:30	Dawn
7252	000	6778	No	0	0	0	0	0	0	0	0	0	0	0	0	0	0	0	#DIV/0!	#DIV/0!	0	Summer	2011-12-25	18:30	Afternoon
7253	000	6779	No	0	0	0	0	0	0	0	0	0	0	0	0	0	0	0	#DIV/0!	#DIV/0!	0	Summer	2011-12-25	19:00	Afternoon
7263	000	6789	No	0	0	0	0	0	0	0	0	0	0	0	0	0	0	0	#DIV/0!	#DIV/0!	0	Summer	2011-12-26	0:00	Night
7273	000	6799	No	0	0	0	0	0	0	0	0	0	0	0	0	0	0	0	#DIV/0!	#DIV/0!	0	Summer	2011-12-26	5:00	Morning
7284	000	6810	No	0	0	0	0	0	0	0	0	0	0	0	0	0	0	0	#DIV/0!	#DIV/0!	0	Summer	2011-12-26	10:30	Morning
7336	000	6862	No	0	0	0	0	0	0	0	0	0	0	0	0	0	0	0	#DIV/0!	#DIV/0!	0	Summer	2011-12-27	12:30	Morning
7378	000	6904	No	0	0	0	0	0	0	0	0	0	0	0	0	0	0	0	#DIV/0!	#DIV/0!	0	Summer	2011-12-28	9:30	Morning
7409	000	6935	No	0	0	0	0	0	0	0	0	0	0	0	0	0	0	0	#DIV/0!	#DIV/0!	0	Summer	2011-12-29	1:00	Night
7446	000	6972	No	0	0	0	0	0	0	0	0	0	0	0	0	0	0	0	#DIV/0!	#DIV/0!	0	Summer	2011-12-29	19:30	Afternoon
7451	000	6977	No	0	0	0	0	0	0	0	0	0	0	0	0	0	0	0	#DIV/0!	#DIV/0!	0	Summer	2011-12-29	22:00	Dusk
7501	000	7027	No	0	0	0	0	0	0	0	0	0	0	0	0	0	0	0	#DIV/0!	#DIV/0!	0	Summer	2011-12-30	23:00	Night
7507	000	7033	No	0	0	0	0	0	0	0	0	0	0	0	0	0	0	0	#DIV/0!	#DIV/0!	0	Summer	2011-12-31	2:00	Night
7509	000	7035	No	0	0	0	0	0	0	0	0	0	0	0	0	0	0	0	#DIV/0!	#DIV/0!	0	Summer	2011-12-31	3:00	Dawn
7515	000	7041	No	0	0	0	0	0	0	0	0	0	0	0	0	0	0	0	#DIV/0!	#DIV/0!	0	Summer	2011-12-31	6:00	Morning
7519	000	7045	No	0	0	0	0	0	0	0	0	0	0	0	0	0	0	0	#DIV/0!	#DIV/0!	0	Summer	2011-12-31	8:00	Morning
7523	000	7049	No	0	0	0	0	0	0	0	0	0	0	0	0	0	0	0	#DIV/0!	#DIV/0!	0	Summer	2011-12-31	10:00	Morning
7524	000	7050	No	0	0	0	0	0	0	0	0	0	0	0	0	0	0	0	#DIV/0!	#DIV/0!	0	Summer	2011-12-31	10:30	Morning
7536	000	7062	No	0	0	0	0	0	0	0	0	0	0	0	0	0	0	0	#DIV/0!	#DIV/0!	0	Summer	2011-12-31	16:30	Afternoon
7557	000	7083	No	0	0	0	0	0	0	0	0	0	0	0	0	0	0	0	#DIV/0!	#DIV/0!	0	Summer	2012-01-01	3:00	Dawn
7564	000	7090	No	0	0	0	0	0	0	0	0	0	0	0	0	0	0	0	#DIV/0!	#DIV/0!	0	Summer	2012-01-01	6:30	Morning
7566	000	7092	No	0	0	0	0	0	0	0	0	0	0	0	0	0	0	0	#DIV/0!	#DIV/0!	0	Summer	2012-01-01	7:30	Morning
7581	000	7107	No	0	0	0	0	0	0	0	0	0	0	0	0	0	0	0	#DIV/0!	#DIV/0!	0	Summer	2012-01-01	15:00	Afternoon
7583	000	7109	No	0	0	0	0	0	0	0	0	0	0	0	0	0	0	0	#DIV/0!	#DIV/0!	0	Summer	2012-01-01	16:00	Afternoon
7612	000	7138	No	0	0	0	0	0	0	0	0	0	0	0	0	0	0	0	#DIV/0!	#DIV/0!	0	Summer	2012-01-02	6:30	Morning
7621	000	7147	No	0	0	0	0	0	0	0	0	0	0	0	0	0	0	0	#DIV/0!	#DIV/0!	0	Summer	2012-01-02	11:00	Morning
7636	000	7162	No	0	0	0	0	0	0	0	0	0	0	0	0	0	0	0	#DIV/0!	#DIV/0!	0	Summer	2012-01-02	18:30	Afternoon
7638	000	7164	No	0	0	0	0	0	0	0	0	0	0	0	0	0	0	0	#DIV/0!	#DIV/0!	0	Summer	2012-01-02	19:30	Afternoon
7644	000	7170	No	0	0	0	0	0	0	0	0	0	0	0	0	0	0	0	#DIV/0!	#DIV/0!	0	Summer	2012-01-02	22:30	Dusk
7656	000	7182	No	0	0	0	0	0	0	0	0	0	0	0	0	0	0	0	#DIV/0!	#DIV/0!	0	Summer	2012-01-03	4:30	Dawn
7692	000	7218	No	0	0	0	0	0	0	0	0	0	0	0	0	0	0	0	#DIV/0!	#DIV/0!	0	Summer	2012-01-03	22:30	Dusk
7699	000	7225	No	0	0	0	0	0	0	0	0	0	0	0	0	0	0	0	#DIV/0!	#DIV/0!	0	Summer	2012-01-04	2:00	Night
7701	000	7227	No	0	0	0	0	0	0	0	0	0	0	0	0	0	0	0	#DIV/0!	#DIV/0!	0	Summer	2012-01-04	3:00	Dawn
7706	000	7232	No	0	0	0	0	0	0	0	0	0	0	0	0	0	0	0	#DIV/0!	#DIV/0!	0	Summer	2012-01-04	5:30	Morning
7714	000	7240	No	0	0	0	0	0	0	0	0	0	0	0	0	0	0	0	#DIV/0!	#DIV/0!	0	Summer	2012-01-04	9:30	Morning
7732	000	7258	No	0	0	0	0	0	0	0	0	0	0	0	0	0	0	0	#DIV/0!	#DIV/0!	0	Summer	2012-01-04	18:30	Afternoon
7735	000	7261	No	0	0	0	0	0	0	0	0	0	0	0	0	0	0	0	#DIV/0!	#DIV/0!	0	Summer	2012-01-04	20:00	Afternoon
7753	000	7279	No	0	0	0	0	0	0	0	0	0	0	0	0	0	0	0	#DIV/0!	#DIV/0!	0	Summer	2012-01-05	5:00	Morning
7821	000	7347	No	0	0	0	0	0	0	0	0	0	0	0	0	0	0	0	#DIV/0!	#DIV/0!	0	Summer	2012-01-06	15:00	Afternoon
7824	000	7350	No	0	0	0	0	0	0	0	0	0	0	0	0	0	0	0	#DIV/0!	#DIV/0!	0	Summer	2012-01-06	16:30	Afternoon
7829	000	7355	No	0	0	0	0	0	0	0	0	0	0	0	0	0	0	0	#DIV/0!	#DIV/0!	0	Summer	2012-01-06	19:00	Afternoon
7853	000	7379	No	0	0	0	0	0	0	0	0	0	0	0	0	0	0	0	#DIV/0!	#DIV/0!	0	Summer	2012-01-07	7:00	Morning
7864	000	7390	No	0	0	0	0	0	0	0	0	0	0	0	0	0	0	0	#DIV/0!	#DIV/0!	0	Summer	2012-01-07	12:30	Morning
7893	000	7419	No	0	0	0	0	0	0	0	0	0	0	0	0	0	0	0	#DIV/0!	#DIV/0!	0	Summer	2012-01-08	3:00	Night
7906	000	7432	No	0	0	0	0	0	0	0	0	0	0	0	0	0	0	0	#DIV/0!	#DIV/0!	0	Summer	2012-01-08	9:30	Morning
7918	000	7444	No	0	0	0	0	0	0	0	0	0	0	0	0	0	0	0	#DIV/0!	#DIV/0!	0	Summer	2012-01-08	15:30	Afternoon
7941	000	7467	No	0	0	0	0	0	0	0	0	0	0	0	0	0	0	0	#DIV/0!	#DIV/0!	0	Summer	2012-01-09	3:00	Night
7942	000	7468	No	0	0	0	0	0	0	0	0	0	0	0	0	0	0	0	#DIV/0!	#DIV/0!	0	Summer	2012-01-09	3:30	Dawn
7949	000	7475	No	0	0	0	0	0	0	0	0	0	0	0	0	0	0	0	#DIV/0!	#DIV/0!	0	Summer	2012-01-09	7:00	Morning
7956	000	7482	No	0	0	0	0	0	0	0	0	0	0	0	0	0	0	0	#DIV/0!	#DIV/0!	0	Summer	2012-01-09	10:30	Morning
7983	000	7509	No	0	0	0	0	0	0	0	0	0	0	0	0	0	0	0	#DIV/0!	#DIV/0!	0	Summer	2012-01-10	0:00	Night
8002	000	7528	No	0	0	0	0	0	0	0	0	0	0	0	0	0	0	0	#DIV/0!	#DIV/0!	0	Summer	2012-01-10	9:30	Morning
8007	000	7533	No	0	0	0	0	0	0	0	0	0	0	0	0	0	0	0	#DIV/0!	#DIV/0!	0	Summer	2012-01-10	12:00	Morning
8010	000	7536	No	0	0	0	0	0	0	0	0	0	0	0	0	0	0	0	#DIV/0!	#DIV/0!	0	Summer	2012-01-10	13:30	Afternoon
8025	000	7551	No	0	0	0	0	0	0	0	0	0	0	0	0	0	0	0	#DIV/0!	#DIV/0!	0	Summer	2012-01-10	21:00	Afternoon
8035	000	7561	No	0	0	0	0	0	0	0	0	0	0	0	0	0	0	0	#DIV/0!	#DIV/0!	0	Summer	2012-01-11	2:00	Night
8036	000	7562	No	0	0	0	0	0	0	0	0	0	0	0	0	0	0	0	#DIV/0!	#DIV/0!	0	Summer	2012-01-11	2:30	Night
8038	000	7564	No	0	0	0	0	0	0	0	0	0	0	0	0	0	0	0	#DIV/0!	#DIV/0!	0	Summer	2012-01-11	3:30	Dawn
8043	000	7569	No	0	0	0	0	0	0	0	0	0	0	0	0	0	0	0	#DIV/0!	#DIV/0!	0	Summer	2012-01-11	6:00	Morning
8044	000	7570	No	0	0	0	0	0	0	0	0	0	0	0	0	0	0	0	#DIV/0!	#DIV/0!	0	Summer	2012-01-11	6:30	Morning
8047	000	7573	No	0	0	0	0	0	0	0	0	0	0	0	0	0	0	0	#DIV/0!	#DIV/0!	0	Summer	2012-01-11	8:00	Morning
8051	000	7577	No	0	0	0	0	0	0	0	0	0	0	0	0	0	0	0	#DIV/0!	#DIV/0!	0	Summer	2012-01-11	10:00	Morning
8065	000	7591	No	0	0	0	0	0	0	0	0	0	0	0	0	0	0	0	#DIV/0!	#DIV/0!	0	Summer	2012-01-11	17:00	Afternoon
8076	000	7602	No	0	0	0	0	0	0	0	0	0	0	0	0	0	0	0	#DIV/0!	#DIV/0!	0	Summer	2012-01-11	22:30	Dusk
8078	000	7604	No	0	0	0	0	0	0	0	0	0	0	0	0	0	0	0	#DIV/0!	#DIV/0!	0	Summer	2012-01-11	23:30	Night
8086	000	7612	No	0	0	0	0	0	0	0	0	0	0	0	0	0	0	0	#DIV/0!	#DIV/0!	0	Summer	2012-01-12	3:30	Dawn
8097	000	7623	No	0	0	0	0	0	0	0	0	0	0	0	0	0	0	0	#DIV/0!	#DIV/0!	0	Summer	2012-01-12	9:00	Morning
8104	000	7630	No	0	0	0	0	0	0	0	0	0	0	0	0	0	0	0	#DIV/0!	#DIV/0!	0	Summer	2012-01-12	12:30	Morning
8112	000	7638	No	0	0	0	0	0	0	0	0	0	0	0	0	0	0	0	#DIV/0!	#DIV/0!	0	Summer	2012-01-12	16:30	Afternoon
8123	000	7649	No	0	0	0	0	0	0	0	0	0	0	0	0	0	0	0	#DIV/0!	#DIV/0!	0	Summer	2012-01-12	22:00	Dusk
8159	000	7685	No	0	0	0	0	0	0	0	0	0	0	0	0	0	0	0	#DIV/0!	#DIV/0!	0	Summer	2012-01-13	16:00	Afternoon
8163	000	7689	No	0	0	0	0	0	0	0	0	0	0	0	0	0	0	0	#DIV/0!	#DIV/0!	0	Summer	2012-01-13	18:00	Afternoon
8173	000	7699	No	0	0	0	0	0	0	0	0	0	0	0	0	0	0	0	#DIV/0!	#DIV/0!	0	Summer	2012-01-13	23:00	Night
8174	000	7700	No	0	0	0	0	0	0	0	0	0	0	0	0	0	0	0	#DIV/0!	#DIV/0!	0	Summer	2012-01-13	23:30	Night
8199	000	7725	No	0	0	0	0	0	0	0	0	0	0	0	0	0	0	0	#DIV/0!	#DIV/0!	0	Summer	2012-01-14	12:00	Morning
8201	000	7727	No	0	0	0	0	0	0	0	0	0	0	0	0	0	0	0	#DIV/0!	#DIV/0!	0	Summer	2012-01-14	13:00	Morning
8231	000	7757	No	0	0	0	0	0	0	0	0	0	0	0	0	0	0	0	#DIV/0!	#DIV/0!	0	Summer	2012-01-15	4:00	Dawn
8247	000	7773	No	0	0	0	0	0	0	0	0	0	0	0	0	0	0	0	#DIV/0!	#DIV/0!	0	Summer	2012-01-15	12:00	Morning
8259	000	7785	No	0	0	0	0	0	0	0	0	0	0	0	0	0	0	0	#DIV/0!	#DIV/0!	0	Summer	2012-01-15	18:00	Afternoon
8270	000	7796	No	0	0	0	0	0	0	0	0	0	0	0	0	0	0	0	#DIV/0!	#DIV/0!	0	Summer	2012-01-15	23:30	Night
8280	000	7806	No	0	0	0	0	0	0	0	0	0	0	0	0	0	0	0	#DIV/0!	#DIV/0!	0	Summer	2012-01-16	4:30	Dawn
8325	000	7851	No	0	0	0	0	0	0	0	0	0	0	0	0	0	0	0	#DIV/0!	#DIV/0!	0	Summer	2012-01-17	3:00	Night
8359	000	7885	No	0	0	0	0	0	0	0	0	0	0	0	0	0	0	0	#DIV/0!	#DIV/0!	0	Summer	2012-01-17	20:00	Afternoon
8361	000	7887	No	0	0	0	0	0	0	0	0	0	0	0	0	0	0	0	#DIV/0!	#DIV/0!	0	Summer	2012-01-17	21:00	Dusk
8376	000	7902	No	0	0	0	0	0	0	0	0	0	0	0	0	0	0	0	#DIV/0!	#DIV/0!	0	Summer	2012-01-18	4:30	Dawn
8377	000	7903	No	0	0	0	0	0	0	0	0	0	0	0	0	0	0	0	#DIV/0!	#DIV/0!	0	Summer	2012-01-18	5:00	Dawn
8403	000	7929	No	0	0	0	0	0	0	0	0	0	0	0	0	0	0	0	#DIV/0!	#DIV/0!	0	Summer	2012-01-18	18:00	Afternoon
8407	000	7933	No	0	0	0	0	0	0	0	0	0	0	0	0	0	0	0	#DIV/0!	#DIV/0!	0	Summer	2012-01-18	20:00	Afternoon
8425	000	7951	No	0	0	0	0	0	0	0	0	0	0	0	0	0	0	0	#DIV/0!	#DIV/0!	0	Summer	2012-01-19	5:00	Dawn
8445	000	7971	No	0	0	0	0	0	0	0	0	0	0	0	0	0	0	0	#DIV/0!	#DIV/0!	0	Summer	2012-01-19	15:00	Afternoon
8456	000	7982	No	0	0	0	0	0	0	0	0	0	0	0	0	0	0	0	#DIV/0!	#DIV/0!	0	Summer	2012-01-19	20:30	Afternoon
8481	000	8007	No	0	0	0	0	0	0	0	0	0	0	0	0	0	0	0	#DIV/0!	#DIV/0!	0	Summer	2012-01-20	9:00	Morning
8492	000	8018	No	0	0	0	0	0	0	0	0	0	0	0	0	0	0	0	#DIV/0!	#DIV/0!	0	Summer	2012-01-20	14:30	Afternoon
8516	000	8042	No	0	0	0	0	0	0	0	0	0	0	0	0	0	0	0	#DIV/0!	#DIV/0!	0	Summer	2012-01-21	2:30	Night
8517	000	8043	No	0	0	0	0	0	0	0	0	0	0	0	0	0	0	0	#DIV/0!	#DIV/0!	0	Summer	2012-01-21	3:00	Night
8532	000	8058	No	0	0	0	0	0	0	0	0	0	0	0	0	0	0	0	#DIV/0!	#DIV/0!	0	Summer	2012-01-21	10:30	Morning
8535	000	8061	No	0	0	0	0	0	0	0	0	0	0	0	0	0	0	0	#DIV/0!	#DIV/0!	0	Summer	2012-01-21	12:00	Morning
8562	000	8088	No	0	0	0	0	0	0	0	0	0	0	0	0	0	0	0	#DIV/0!	#DIV/0!	0	Summer	2012-01-22	1:30	Night
8567	000	8093	No	0	0	0	0	0	0	0	0	0	0	0	0	0	0	0	#DIV/0!	#DIV/0!	0	Summer	2012-01-22	4:00	Dawn
8588	000	8114	No	0	0	0	0	0	0	0	0	0	0	0	0	0	0	0	#DIV/0!	#DIV/0!	0	Summer	2012-01-22	14:30	Afternoon
8596	000	8122	No	0	0	0	0	0	0	0	0	0	0	0	0	0	0	0	#DIV/0!	#DIV/0!	0	Summer	2012-01-22	18:30	Afternoon
8597	000	8123	No	0	0	0	0	0	0	0	0	0	0	0	0	0	0	0	#DIV/0!	#DIV/0!	0	Summer	2012-01-22	19:00	Afternoon
8633	000	8159	No	0	0	0	0	0	0	0	0	0	0	0	0	0	0	0	#DIV/0!	#DIV/0!	0	Summer	2012-01-23	13:00	Morning
8644	000	8170	No	0	0	0	0	0	0	0	0	0	0	0	0	0	0	0	#DIV/0!	#DIV/0!	0	Summer	2012-01-23	18:30	Afternoon
8658	000	8184	No	0	0	0	0	0	0	0	0	0	0	0	0	0	0	0	#DIV/0!	#DIV/0!	0	Summer	2012-01-24	1:30	Night
8665	000	8191	No	0	0	0	0	0	0	0	0	0	0	0	0	0	0	0	#DIV/0!	#DIV/0!	0	Summer	2012-01-24	5:00	Dawn
8685	000	8211	No	0	0	0	0	0	0	0	0	0	0	0	0	0	0	0	#DIV/0!	#DIV/0!	0	Summer	2012-01-24	15:00	Afternoon
8701	000	8227	No	0	0	0	0	0	0	0	0	0	0	0	0	0	0	0	#DIV/0!	#DIV/0!	0	Summer	2012-01-24	23:00	Night
8726	000	8252	No	0	0	0	0	0	0	0	0	0	0	0	0	0	0	0	#DIV/0!	#DIV/0!	0	Summer	2012-01-25	11:30	Morning
8749	000	8275	No	0	0	0	0	0	0	0	0	0	0	0	0	0	0	0	#DIV/0!	#DIV/0!	0	Summer	2012-01-25	23:00	Night
8771	000	8297	No	0	0	0	0	0	0	0	0	0	0	0	0	0	0	0	#DIV/0!	#DIV/0!	0	Summer	2012-01-26	10:00	Morning
8786	000	8312	No	0	0	0	0	0	0	0	0	0	0	0	0	0	0	0	#DIV/0!	#DIV/0!	0	Summer	2012-01-26	17:30	Afternoon
8810	000	8336	No	0	0	0	0	0	0	0	0	0	0	0	0	0	0	0	#DIV/0!	#DIV/0!	0	Summer	2012-01-27	5:30	Morning
8818	000	8344	No	0	0	0	0	0	0	0	0	0	0	0	0	0	0	0	#DIV/0!	#DIV/0!	0	Summer	2012-01-27	9:30	Morning
8821	000	8347	No	0	0	0	0	0	0	0	0	0	0	0	0	0	0	0	#DIV/0!	#DIV/0!	0	Summer	2012-01-27	11:00	Morning
8834	000	8360	No	0	0	0	0	0	0	0	0	0	0	0	0	0	0	0	#DIV/0!	#DIV/0!	0	Summer	2012-01-27	17:30	Afternoon
8843	000	8369	No	0	0	0	0	0	0	0	0	0	0	0	0	0	0	0	#DIV/0!	#DIV/0!	0	Summer	2012-01-27	22:00	Dusk
8857	000	8383	No	0	0	0	0	0	0	0	0	0	0	0	0	0	0	0	#DIV/0!	#DIV/0!	0	Summer	2012-01-28	5:00	Dawn
8871	000	8397	No	0	0	0	0	0	0	0	0	0	0	0	0	0	0	0	#DIV/0!	#DIV/0!	0	Summer	2012-01-28	12:00	Morning
8874	000	8400	No	0	0	0	0	0	0	0	0	0	0	0	0	0	0	0	#DIV/0!	#DIV/0!	0	Summer	2012-01-28	13:30	Afternoon
8879	000	8405	No	0	0	0	0	0	0	0	0	0	0	0	0	0	0	0	#DIV/0!	#DIV/0!	0	Summer	2012-01-28	16:00	Afternoon
8883	000	8409	No	0	0	0	0	0	0	0	0	0	0	0	0	0	0	0	#DIV/0!	#DIV/0!	0	Summer	2012-01-28	18:00	Afternoon
8900	000	8426	No	0	0	0	0	0	0	0	0	0	0	0	0	0	0	0	#DIV/0!	#DIV/0!	0	Summer	2012-01-29	2:30	Night
8933	000	8459	No	0	0	0	0	0	0	0	0	0	0	0	0	0	0	0	#DIV/0!	#DIV/0!	0	Summer	2012-01-29	19:00	Afternoon
8951	000	8477	No	0	0	0	0	0	0	0	0	0	0	0	0	0	0	0	#DIV/0!	#DIV/0!	0	Summer	2012-01-30	4:00	Dawn
8960	000	8486	No	0	0	0	0	0	0	0	0	0	0	0	0	0	0	0	#DIV/0!	#DIV/0!	0	Summer	2012-01-30	8:30	Morning
8985	000	8511	No	0	0	0	0	0	0	0	0	0	0	0	0	0	0	0	#DIV/0!	#DIV/0!	0	Summer	2012-01-30	21:00	Dusk
8990	000	8516	No	0	0	0	0	0	0	0	0	0	0	0	0	0	0	0	#DIV/0!	#DIV/0!	0	Summer	2012-01-30	23:30	Night
9003	000	8529	No	0	0	0	0	0	0	0	0	0	0	0	0	0	0	0	#DIV/0!	#DIV/0!	0	Summer	2012-01-31	6:00	Morning
9014	000	8540	No	0	0	0	0	0	0	0	0	0	0	0	0	0	0	0	#DIV/0!	#DIV/0!	0	Summer	2012-01-31	11:30	Morning
9034	000	8560	No	0	0	0	0	0	0	0	0	0	0	0	0	0	0	0	#DIV/0!	#DIV/0!	0	Summer	2012-01-31	21:30	Dusk
9051	000	8577	No	0	0	0	0	0	0	0	0	0	0	0	0	0	0	0	#DIV/0!	#DIV/0!	0	Summer	2012-02-01	6:00	Morning
9061	000	8587	No	0	0	0	0	0	0	0	0	0	0	0	0	0	0	0	#DIV/0!	#DIV/0!	0	Summer	2012-02-01	11:00	Morning
9089	000	8615	No	0	0	0	0	0	0	0	0	0	0	0	0	0	0	0	#DIV/0!	#DIV/0!	0	Summer	2012-02-02	1:00	Night
9096	000	8622	No	0	0	0	0	0	0	0	0	0	0	0	0	0	0	0	#DIV/0!	#DIV/0!	0	Summer	2012-02-02	4:30	Dawn
9108	000	8634	No	0	0	0	0	0	0	0	0	0	0	0	0	0	0	0	#DIV/0!	#DIV/0!	0	Summer	2012-02-02	10:30	Morning
9115	000	8641	No	0	0	0	0	0	0	0	0	0	0	0	0	0	0	0	#DIV/0!	#DIV/0!	0	Summer	2012-02-02	14:00	Afternoon
9140	000	8666	No	0	0	0	0	0	0	0	0	0	0	0	0	0	0	0	#DIV/0!	#DIV/0!	0	Summer	2012-02-03	2:30	Night
9143	000	8669	No	0	0	0	0	0	0	0	0	0	0	0	0	0	0	0	#DIV/0!	#DIV/0!	0	Summer	2012-02-03	4:00	Night
9151	000	8677	No	0	0	0	0	0	0	0	0	0	0	0	0	0	0	0	#DIV/0!	#DIV/0!	0	Summer	2012-02-03	8:00	Morning
9156	000	8682	No	0	0	0	0	0	0	0	0	0	0	0	0	0	0	0	#DIV/0!	#DIV/0!	0	Summer	2012-02-03	10:30	Morning
9164	000	8690	No	0	0	0	0	0	0	0	0	0	0	0	0	0	0	0	#DIV/0!	#DIV/0!	0	Summer	2012-02-03	14:30	Afternoon
9166	000	8692	No	0	0	0	0	0	0	0	0	0	0	0	0	0	0	0	#DIV/0!	#DIV/0!	0	Summer	2012-02-03	15:30	Afternoon
9189	000	8715	No	0	0	0	0	0	0	0	0	0	0	0	0	0	0	0	#DIV/0!	#DIV/0!	0	Summer	2012-02-04	3:00	Night
9195	000	8721	No	0	0	0	0	0	0	0	0	0	0	0	0	0	0	0	#DIV/0!	#DIV/0!	0	Summer	2012-02-04	6:00	Morning
9210	000	8736	No	0	0	0	0	0	0	0	0	0	0	0	0	0	0	0	#DIV/0!	#DIV/0!	0	Summer	2012-02-04	13:30	Afternoon
9236	000	8762	No	0	0	0	0	0	0	0	0	0	0	0	0	0	0	0	#DIV/0!	#DIV/0!	0	Summer	2012-02-05	2:30	Night
9237	000	8763	No	0	0	0	0	0	0	0	0	0	0	0	0	0	0	0	#DIV/0!	#DIV/0!	0	Summer	2012-02-05	3:00	Night
9250	000	8776	No	0	0	0	0	0	0	0	0	0	0	0	0	0	0	0	#DIV/0!	#DIV/0!	0	Summer	2012-02-05	9:30	Morning
9252	000	8778	No	0	0	0	0	0	0	0	0	0	0	0	0	0	0	0	#DIV/0!	#DIV/0!	0	Summer	2012-02-05	10:30	Morning
9258	000	8784	No	0	0	0	0	0	0	0	0	0	0	0	0	0	0	0	#DIV/0!	#DIV/0!	0	Summer	2012-02-05	13:30	Afternoon
9264	000	8790	No	0	0	0	0	0	0	0	0	0	0	0	0	0	0	0	#DIV/0!	#DIV/0!	0	Summer	2012-02-05	16:30	Afternoon
9283	000	8809	No	0	0	0	0	0	0	0	0	0	0	0	0	0	0	0	#DIV/0!	#DIV/0!	0	Summer	2012-02-06	2:00	Night
9286	000	8812	No	0	0	0	0	0	0	0	0	0	0	0	0	0	0	0	#DIV/0!	#DIV/0!	0	Summer	2012-02-06	3:30	Night
9290	000	8816	No	0	0	0	0	0	0	0	0	0	0	0	0	0	0	0	#DIV/0!	#DIV/0!	0	Summer	2012-02-06	5:30	Dawn
9318	000	8844	No	0	0	0	0	0	0	0	0	0	0	0	0	0	0	0	#DIV/0!	#DIV/0!	0	Summer	2012-02-06	19:30	Afternoon
9324	000	8850	No	0	0	0	0	0	0	0	0	0	0	0	0	0	0	0	#DIV/0!	#DIV/0!	0	Summer	2012-02-06	22:30	Night
9325	000	8851	No	0	0	0	0	0	0	0	0	0	0	0	0	0	0	0	#DIV/0!	#DIV/0!	0	Summer	2012-02-06	23:00	Night
9339	000	8865	No	0	0	0	0	0	0	0	0	0	0	0	0	0	0	0	#DIV/0!	#DIV/0!	0	Summer	2012-02-07	6:00	Morning
9356	000	8882	No	0	0	0	0	0	0	0	0	0	0	0	0	0	0	0	#DIV/0!	#DIV/0!	0	Summer	2012-02-07	14:30	Afternoon
9368	000	8894	No	0	0	0	0	0	0	0	0	0	0	0	0	0	0	0	#DIV/0!	#DIV/0!	0	Summer	2012-02-07	20:30	Afternoon
9375	000	8901	No	0	0	0	0	0	0	0	0	0	0	0	0	0	0	0	#DIV/0!	#DIV/0!	0	Summer	2012-02-08	0:00	Night
9386	000	8912	No	0	0	0	0	0	0	0	0	0	0	0	0	0	0	0	#DIV/0!	#DIV/0!	0	Summer	2012-02-08	5:30	Dawn
9388	000	8914	No	0	0	0	0	0	0	0	0	0	0	0	0	0	0	0	#DIV/0!	#DIV/0!	0	Summer	2012-02-08	6:30	Morning
9390	000	8916	No	0	0	0	0	0	0	0	0	0	0	0	0	0	0	0	#DIV/0!	#DIV/0!	0	Summer	2012-02-08	7:30	Morning
9414	000	8940	No	0	0	0	0	0	0	0	0	0	0	0	0	0	0	0	#DIV/0!	#DIV/0!	0	Summer	2012-02-08	19:30	Afternoon
9419	000	8945	No	0	0	0	0	0	0	0	0	0	0	0	0	0	0	0	#DIV/0!	#DIV/0!	0	Summer	2012-02-08	22:00	Dusk
9441	000	8967	No	0	0	0	0	0	0	0	0	0	0	0	0	0	0	0	#DIV/0!	#DIV/0!	0	Summer	2012-02-09	9:00	Morning
9442	000	8968	No	0	0	0	0	0	0	0	0	0	0	0	0	0	0	0	#DIV/0!	#DIV/0!	0	Summer	2012-02-09	9:30	Morning
9447	000	8973	No	0	0	0	0	0	0	0	0	0	0	0	0	0	0	0	#DIV/0!	#DIV/0!	0	Summer	2012-02-09	12:00	Morning
9494	000	9020	No	0	0	0	0	0	0	0	0	0	0	0	0	0	0	0	#DIV/0!	#DIV/0!	0	Summer	2012-02-10	11:30	Morning
9507	000	9033	No	0	0	0	0	0	0	0	0	0	0	0	0	0	0	0	#DIV/0!	#DIV/0!	0	Summer	2012-02-10	18:00	Afternoon
9516	000	9042	No	0	0	0	0	0	0	0	0	0	0	0	0	0	0	0	#DIV/0!	#DIV/0!	0	Summer	2012-02-10	22:30	Night
9519	000	9045	No	0	0	0	0	0	0	0	0	0	0	0	0	0	0	0	#DIV/0!	#DIV/0!	0	Summer	2012-02-11	0:00	Night
9526	000	9052	No	0	0	0	0	0	0	0	0	0	0	0	0	0	0	0	#DIV/0!	#DIV/0!	0	Summer	2012-02-11	3:30	Night
9527	000	9053	No	0	0	0	0	0	0	0	0	0	0	0	0	0	0	0	#DIV/0!	#DIV/0!	0	Summer	2012-02-11	4:00	Night
9541	000	9067	No	0	0	0	0	0	0	0	0	0	0	0	0	0	0	0	#DIV/0!	#DIV/0!	0	Summer	2012-02-11	11:00	Morning
9547	000	9073	No	0	0	0	0	0	0	0	0	0	0	0	0	0	0	0	#DIV/0!	#DIV/0!	0	Summer	2012-02-11	14:00	Afternoon
9549	000	9075	No	0	0	0	0	0	0	0	0	0	0	0	0	0	0	0	#DIV/0!	#DIV/0!	0	Summer	2012-02-11	15:00	Afternoon
9557	000	9083	No	0	0	0	0	0	0	0	0	0	0	0	0	0	0	0	#DIV/0!	#DIV/0!	0	Summer	2012-02-11	19:00	Afternoon
9562	000	9088	No	0	0	0	0	0	0	0	0	0	0	0	0	0	0	0	#DIV/0!	#DIV/0!	0	Summer	2012-02-11	21:30	Dusk
9565	000	9091	No	0	0	0	0	0	0	0	0	0	0	0	0	0	0	0	#DIV/0!	#DIV/0!	0	Summer	2012-02-11	23:00	Night
9580	000	9106	No	0	0	0	0	0	0	0	0	0	0	0	0	0	0	0	#DIV/0!	#DIV/0!	0	Summer	2012-02-12	6:30	Morning
9581	000	9107	No	0	0	0	0	0	0	0	0	0	0	0	0	0	0	0	#DIV/0!	#DIV/0!	0	Summer	2012-02-12	7:00	Morning
9583	000	9109	No	0	0	0	0	0	0	0	0	0	0	0	0	0	0	0	#DIV/0!	#DIV/0!	0	Summer	2012-02-12	8:00	Morning
9589	000	9115	No	0	0	0	0	0	0	0	0	0	0	0	0	0	0	0	#DIV/0!	#DIV/0!	0	Summer	2012-02-12	11:00	Morning
9591	000	9117	No	0	0	0	0	0	0	0	0	0	0	0	0	0	0	0	#DIV/0!	#DIV/0!	0	Summer	2012-02-12	12:00	Morning
9594	000	9120	No	0	0	0	0	0	0	0	0	0	0	0	0	0	0	0	#DIV/0!	#DIV/0!	0	Summer	2012-02-12	13:30	Afternoon
9632	000	9158	No	0	0	0	0	0	0	0	0	0	0	0	0	0	0	0	#DIV/0!	#DIV/0!	0	Summer	2012-02-13	8:30	Morning
9638	000	9164	No	0	0	0	0	0	0	0	0	0	0	0	0	0	0	0	#DIV/0!	#DIV/0!	0	Summer	2012-02-13	11:30	Morning
9648	000	9174	No	0	0	0	0	0	0	0	0	0	0	0	0	0	0	0	#DIV/0!	#DIV/0!	0	Summer	2012-02-13	16:30	Afternoon
9674	000	9200	No	0	0	0	0	0	0	0	0	0	0	0	0	0	0	0	#DIV/0!	#DIV/0!	0	Summer	2012-02-14	5:30	Dawn
9680	000	9206	No	0	0	0	0	0	0	0	0	0	0	0	0	0	0	0	#DIV/0!	#DIV/0!	0	Summer	2012-02-14	8:30	Morning
9693	000	9219	No	0	0	0	0	0	0	0	0	0	0	0	0	0	0	0	#DIV/0!	#DIV/0!	0	Summer	2012-02-14	15:00	Afternoon
9713	000	9239	No	0	0	0	0	0	0	0	0	0	0	0	0	0	0	0	#DIV/0!	#DIV/0!	0	Summer	2012-02-15	1:00	Night
9735	000	9261	No	0	0	0	0	0	0	0	0	0	0	0	0	0	0	0	#DIV/0!	#DIV/0!	0	Summer	2012-02-15	12:00	Morning
9746	000	9272	No	0	0	0	0	0	0	0	0	0	0	0	0	0	0	0	#DIV/0!	#DIV/0!	0	Summer	2012-02-15	17:30	Afternoon
9767	000	9293	No	0	0	0	0	0	0	0	0	0	0	0	0	0	0	0	#DIV/0!	#DIV/0!	0	Summer	2012-02-16	4:00	Night
9797	000	9323	No	0	0	0	0	0	0	0	0	0	0	0	0	0	0	0	#DIV/0!	#DIV/0!	0	Summer	2012-02-16	19:00	Afternoon
9837	000	9363	No	0	0	0	0	0	0	0	0	0	0	0	0	0	0	0	#DIV/0!	#DIV/0!	0	Summer	2012-02-17	15:00	Afternoon
9855	000	9381	No	0	0	0	0	0	0	0	0	0	0	0	0	0	0	0	#DIV/0!	#DIV/0!	0	Summer	2012-02-18	0:00	Night
9859	000	9385	No	0	0	0	0	0	0	0	0	0	0	0	0	0	0	0	#DIV/0!	#DIV/0!	0	Summer	2012-02-18	2:00	Night
9868	000	9394	No	0	0	0	0	0	0	0	0	0	0	0	0	0	0	0	#DIV/0!	#DIV/0!	0	Summer	2012-02-18	6:30	Morning
9869	000	9395	No	0	0	0	0	0	0	0	0	0	0	0	0	0	0	0	#DIV/0!	#DIV/0!	0	Summer	2012-02-18	7:00	Morning
9875	000	9401	No	0	0	0	0	0	0	0	0	0	0	0	0	0	0	0	#DIV/0!	#DIV/0!	0	Summer	2012-02-18	10:00	Morning
9884	000	9410	No	0	0	0	0	0	0	0	0	0	0	0	0	0	0	0	#DIV/0!	#DIV/0!	0	Summer	2012-02-18	14:30	Afternoon
9886	000	9412	No	0	0	0	0	0	0	0	0	0	0	0	0	0	0	0	#DIV/0!	#DIV/0!	0	Summer	2012-02-18	15:30	Afternoon
9888	000	9414	No	0	0	0	0	0	0	0	0	0	0	0	0	0	0	0	#DIV/0!	#DIV/0!	0	Summer	2012-02-18	16:30	Afternoon
9893	000	9419	No	0	0	0	0	0	0	0	0	0	0	0	0	0	0	0	#DIV/0!	#DIV/0!	0	Summer	2012-02-18	19:00	Afternoon
9898	000	9424	No	0	0	0	0	0	0	0	0	0	0	0	0	0	0	0	#DIV/0!	#DIV/0!	0	Summer	2012-02-18	21:30	Dusk
9910	000	9436	No	0	0	0	0	0	0	0	0	0	0	0	0	0	0	0	#DIV/0!	#DIV/0!	0	Summer	2012-02-19	3:30	Night
9915	000	9441	No	0	0	0	0	0	0	0	0	0	0	0	0	0	0	0	#DIV/0!	#DIV/0!	0	Summer	2012-02-19	6:00	Dawn
9918	000	9444	No	0	0	0	0	0	0	0	0	0	0	0	0	0	0	0	#DIV/0!	#DIV/0!	0	Summer	2012-02-19	7:30	Morning
9922	000	9448	No	0	0	0	0	0	0	0	0	0	0	0	0	0	0	0	#DIV/0!	#DIV/0!	0	Summer	2012-02-19	9:30	Morning
9932	000	9458	No	0	0	0	0	0	0	0	0	0	0	0	0	0	0	0	#DIV/0!	#DIV/0!	0	Summer	2012-02-19	14:30	Afternoon
9940	000	9466	No	0	0	0	0	0	0	0	0	0	0	0	0	0	0	0	#DIV/0!	#DIV/0!	0	Summer	2012-02-19	18:30	Afternoon
9943	000	9469	No	0	0	0	0	0	0	0	0	0	0	0	0	0	0	0	#DIV/0!	#DIV/0!	0	Summer	2012-02-19	20:00	Afternoon
9948	000	9474	No	0	0	0	0	0	0	0	0	0	0	0	0	0	0	0	#DIV/0!	#DIV/0!	0	Summer	2012-02-19	22:30	Night
9964	000	9490	No	0	0	0	0	0	0	0	0	0	0	0	0	0	0	0	#DIV/0!	#DIV/0!	0	Summer	2012-02-20	6:30	Morning
9976	000	9502	No	0	0	0	0	0	0	0	0	0	0	0	0	0	0	0	#DIV/0!	#DIV/0!	0	Summer	2012-02-20	12:30	Morning
9978	000	9504	No	0	0	0	0	0	0	0	0	0	0	0	0	0	0	0	#DIV/0!	#DIV/0!	0	Summer	2012-02-20	13:30	Afternoon
10000	000	9526	No	0	0	0	0	0	0	0	0	0	0	0	0	0	0	0	#DIV/0!	#DIV/0!	0	Summer	2012-02-21	0:30	Night
10004	000	9530	No	0	0	0	0	0	0	0	0	0	0	0	0	0	0	0	#DIV/0!	#DIV/0!	0	Summer	2012-02-21	2:30	Night
10024	000	9550	No	0	0	0	0	0	0	0	0	0	0	0	0	0	0	0	#DIV/0!	#DIV/0!	0	Summer	2012-02-21	12:30	Morning
10045	000	9571	No	0	0	0	0	0	0	0	0	0	0	0	0	0	0	0	#DIV/0!	#DIV/0!	0	Summer	2012-02-21	23:00	Night
10062	000	9588	No	0	0	0	0	0	0	0	0	0	0	0	0	0	0	0	#DIV/0!	#DIV/0!	0	Summer	2012-02-22	7:30	Morning
10074	000	9600	No	0	0	0	0	0	0	0	0	0	0	0	0	0	0	0	#DIV/0!	#DIV/0!	0	Summer	2012-02-22	13:30	Afternoon
10079	000	9605	No	0	0	0	0	0	0	0	0	0	0	0	0	0	0	0	#DIV/0!	#DIV/0!	0	Summer	2012-02-22	16:00	Afternoon
10081	000	9607	No	0	0	0	0	0	0	0	0	0	0	0	0	0	0	0	#DIV/0!	#DIV/0!	0	Summer	2012-02-22	17:00	Afternoon
10082	000	9608	No	0	0	0	0	0	0	0	0	0	0	0	0	0	0	0	#DIV/0!	#DIV/0!	0	Summer	2012-02-22	17:30	Afternoon
10083	000	9609	No	0	0	0	0	0	0	0	0	0	0	0	0	0	0	0	#DIV/0!	#DIV/0!	0	Summer	2012-02-22	18:00	Afternoon
10092	000	9618	No	0	0	0	0	0	0	0	0	0	0	0	0	0	0	0	#DIV/0!	#DIV/0!	0	Summer	2012-02-22	22:30	Night
10093	000	9619	No	0	0	0	0	0	0	0	0	0	0	0	0	0	0	0	#DIV/0!	#DIV/0!	0	Summer	2012-02-22	23:00	Night
10099	000	9625	No	0	0	0	0	0	0	0	0	0	0	0	0	0	0	0	#DIV/0!	#DIV/0!	0	Summer	2012-02-23	2:00	Night
10110	000	9636	No	0	0	0	0	0	0	0	0	0	0	0	0	0	0	0	#DIV/0!	#DIV/0!	0	Summer	2012-02-23	7:30	Morning
10168	000	9694	No	0	0	0	0	0	0	0	0	0	0	0	0	0	0	0	#DIV/0!	#DIV/0!	0	Summer	2012-02-24	12:30	Morning
10169	000	9695	No	0	0	0	0	0	0	0	0	0	0	0	0	0	0	0	#DIV/0!	#DIV/0!	0	Summer	2012-02-24	13:00	Morning
10170	000	9696	No	0	0	0	0	0	0	0	0	0	0	0	0	0	0	0	#DIV/0!	#DIV/0!	0	Summer	2012-02-24	13:30	Afternoon
10198	000	9724	No	0	0	0	0	0	0	0	0	0	0	0	0	0	0	0	#DIV/0!	#DIV/0!	0	Summer	2012-02-25	3:30	Night
10217	000	9743	No	0	0	0	0	0	0	0	0	0	0	0	0	0	0	0	#DIV/0!	#DIV/0!	0	Summer	2012-02-25	13:00	Morning
10219	000	9745	No	0	0	0	0	0	0	0	0	0	0	0	0	0	0	0	#DIV/0!	#DIV/0!	0	Summer	2012-02-25	14:00	Afternoon
10227	000	9753	No	0	0	0	0	0	0	0	0	0	0	0	0	0	0	0	#DIV/0!	#DIV/0!	0	Summer	2012-02-25	18:00	Afternoon
10230	000	9756	No	0	0	0	0	0	0	0	0	0	0	0	0	0	0	0	#DIV/0!	#DIV/0!	0	Summer	2012-02-25	19:30	Afternoon
10247	000	9773	No	0	0	0	0	0	0	0	0	0	0	0	0	0	0	0	#DIV/0!	#DIV/0!	0	Summer	2012-02-26	4:00	Night
10256	000	9782	No	0	0	0	0	0	0	0	0	0	0	0	0	0	0	0	#DIV/0!	#DIV/0!	0	Summer	2012-02-26	8:30	Morning
10260	000	9786	No	0	0	0	0	0	0	0	0	0	0	0	0	0	0	0	#DIV/0!	#DIV/0!	0	Summer	2012-02-26	10:30	Morning
10265	000	9791	No	0	0	0	0	0	0	0	0	0	0	0	0	0	0	0	#DIV/0!	#DIV/0!	0	Summer	2012-02-26	13:00	Morning
10278	000	9804	No	0	0	0	0	0	0	0	0	0	0	0	0	0	0	0	#DIV/0!	#DIV/0!	0	Summer	2012-02-26	19:30	Afternoon
10279	000	9805	No	0	0	0	0	0	0	0	0	0	0	0	0	0	0	0	#DIV/0!	#DIV/0!	0	Summer	2012-02-26	20:00	Dusk
10280	000	9806	No	0	0	0	0	0	0	0	0	0	0	0	0	0	0	0	#DIV/0!	#DIV/0!	0	Summer	2012-02-26	20:30	Dusk
10288	000	9814	No	0	0	0	0	0	0	0	0	0	0	0	0	0	0	0	#DIV/0!	#DIV/0!	0	Summer	2012-02-27	0:30	Night
10297	000	9823	No	0	0	0	0	0	0	0	0	0	0	0	0	0	0	0	#DIV/0!	#DIV/0!	0	Summer	2012-02-27	5:00	Night
10313	000	9839	No	0	0	0	0	0	0	0	0	0	0	0	0	0	0	0	#DIV/0!	#DIV/0!	0	Summer	2012-02-27	13:00	Morning
10316	000	9842	No	0	0	0	0	0	0	0	0	0	0	0	0	0	0	0	#DIV/0!	#DIV/0!	0	Summer	2012-02-27	14:30	Afternoon
10317	000	9843	No	0	0	0	0	0	0	0	0	0	0	0	0	0	0	0	#DIV/0!	#DIV/0!	0	Summer	2012-02-27	15:00	Afternoon
10323	000	9849	No	0	0	0	0	0	0	0	0	0	0	0	0	0	0	0	#DIV/0!	#DIV/0!	0	Summer	2012-02-27	18:00	Afternoon
10341	000	9867	No	0	0	0	0	0	0	0	0	0	0	0	0	0	0	0	#DIV/0!	#DIV/0!	0	Summer	2012-02-28	3:00	Night
10353	000	9879	No	0	0	0	0	0	0	0	0	0	0	0	0	0	0	0	#DIV/0!	#DIV/0!	0	Summer	2012-02-28	9:00	Morning
10360	000	9886	No	0	0	0	0	0	0	0	0	0	0	0	0	0	0	0	#DIV/0!	#DIV/0!	0	Summer	2012-02-28	12:30	Morning
10361	000	9887	No	0	0	0	0	0	0	0	0	0	0	0	0	0	0	0	#DIV/0!	#DIV/0!	0	Summer	2012-02-28	13:00	Morning
10362	000	9888	No	0	0	0	0	0	0	0	0	0	0	0	0	0	0	0	#DIV/0!	#DIV/0!	0	Summer	2012-02-28	13:30	Afternoon
10374	000	9900	No	0	0	0	0	0	0	0	0	0	0	0	0	0	0	0	#DIV/0!	#DIV/0!	0	Summer	2012-02-28	19:30	Afternoon
10382	000	9908	No	0	0	0	0	0	0	0	0	0	0	0	0	0	0	0	#DIV/0!	#DIV/0!	0	Summer	2012-02-28	23:30	Night
10388	000	9914	No	0	0	0	0	0	0	0	0	0	0	0	0	0	0	0	#DIV/0!	#DIV/0!	0	Summer	2012-02-29	2:30	Night
10400	000	9926	No	0	0	0	0	0	0	0	0	0	0	0	0	0	0	0	#DIV/0!	#DIV/0!	0	Summer	2012-02-29	8:30	Morning
10411	000	9937	No	0	0	0	0	0	0	0	0	0	0	0	0	0	0	0	#DIV/0!	#DIV/0!	0	Summer	2012-02-29	14:00	Afternoon
10412	000	9938	No	0	0	0	0	0	0	0	0	0	0	0	0	0	0	0	#DIV/0!	#DIV/0!	0	Summer	2012-02-29	14:30	Afternoon
10432	000	9958	No	0	0	0	0	0	0	0	0	0	0	0	0	0	0	0	#DIV/0!	#DIV/0!	0	Autumn	2012-03-02	0:30	Night
10434	000	9960	No	0	0	0	0	0	0	0	0	0	0	0	0	0	0	0	#DIV/0!	#DIV/0!	0	Autumn	2012-03-02	1:30	Night
10455	000	9981	No	0	0	0	0	0	0	0	0	0	0	0	0	0	0	0	#DIV/0!	#DIV/0!	0	Autumn	2012-03-02	12:00	Morning
10457	000	9983	No	0	0	0	0	0	0	0	0	0	0	0	0	0	0	0	#DIV/0!	#DIV/0!	0	Autumn	2012-03-02	13:00	Morning
10484	001	0011	No	0	0	0	0	0	0	0	0	0	0	0	0	0	0	0	#DIV/0!	#DIV/0!	0	Autumn	2012-03-03	2:30	Night
10486	001	0013	No	0	0	0	0	0	0	0	0	0	0	0	0	0	0	0	#DIV/0!	#DIV/0!	0	Autumn	2012-03-03	3:30	Night
10504	001	0031	No	0	0	0	0	0	0	0	0	0	0	0	0	0	0	0	#DIV/0!	#DIV/0!	0	Autumn	2012-03-03	12:30	Morning
10506	001	0033	No	0	0	0	0	0	0	0	0	0	0	0	0	0	0	0	#DIV/0!	#DIV/0!	0	Autumn	2012-03-03	13:30	Afternoon
10508	001	0035	No	0	0	0	0	0	0	0	0	0	0	0	0	0	0	0	#DIV/0!	#DIV/0!	0	Autumn	2012-03-03	14:30	Afternoon
10514	001	0041	No	0	0	0	0	0	0	0	0	0	0	0	0	0	0	0	#DIV/0!	#DIV/0!	0	Autumn	2012-03-03	17:30	Afternoon
10525	001	0052	No	0	0	0	0	0	0	0	0	0	0	0	0	0	0	0	#DIV/0!	#DIV/0!	0	Autumn	2012-03-03	23:00	Night
10536	001	0063	No	0	0	0	0	0	0	0	0	0	0	0	0	0	0	0	#DIV/0!	#DIV/0!	0	Autumn	2012-03-04	4:30	Night
10537	001	0064	No	0	0	0	0	0	0	0	0	0	0	0	0	0	0	0	#DIV/0!	#DIV/0!	0	Autumn	2012-03-04	5:00	Night
10541	001	0068	No	0	0	0	0	0	0	0	0	0	0	0	0	0	0	0	#DIV/0!	#DIV/0!	0	Autumn	2012-03-04	7:00	Morning
10572	001	0099	No	0	0	0	0	0	0	0	0	0	0	0	0	0	0	0	#DIV/0!	#DIV/0!	0	Autumn	2012-03-04	22:30	Night
10599	001	0126	No	0	0	0	0	0	0	0	0	0	0	0	0	0	0	0	#DIV/0!	#DIV/0!	0	Autumn	2012-03-05	12:00	Morning
10604	001	0131	No	0	0	0	0	0	0	0	0	0	0	0	0	0	0	0	#DIV/0!	#DIV/0!	0	Autumn	2012-03-05	14:30	Afternoon
10606	001	0133	No	0	0	0	0	0	0	0	0	0	0	0	0	0	0	0	#DIV/0!	#DIV/0!	0	Autumn	2012-03-05	15:30	Afternoon
10611	001	0138	No	0	0	0	0	0	0	0	0	0	0	0	0	0	0	0	#DIV/0!	#DIV/0!	0	Autumn	2012-03-05	18:00	Afternoon
10629	001	0156	No	0	0	0	0	0	0	0	0	0	0	0	0	0	0	0	#DIV/0!	#DIV/0!	0	Autumn	2012-03-06	3:00	Night
10635	001	0162	No	0	0	0	0	0	0	0	0	0	0	0	0	0	0	0	#DIV/0!	#DIV/0!	0	Autumn	2012-03-06	6:00	Dawn
10669	001	0196	No	0	0	0	0	0	0	0	0	0	0	0	0	0	0	0	#DIV/0!	#DIV/0!	0	Autumn	2012-03-06	23:00	Night
10686	001	0213	No	0	0	0	0	0	0	0	0	0	0	0	0	0	0	0	#DIV/0!	#DIV/0!	0	Autumn	2012-03-07	7:30	Morning
10728	001	0255	No	0	0	0	0	0	0	0	0	0	0	0	0	0	0	0	#DIV/0!	#DIV/0!	0	Autumn	2012-03-08	4:30	Night
10759	001	0286	No	0	0	0	0	0	0	0	0	0	0	0	0	0	0	0	#DIV/0!	#DIV/0!	0	Autumn	2012-03-08	20:00	Dusk
10766	001	0293	No	0	0	0	0	0	0	0	0	0	0	0	0	0	0	0	#DIV/0!	#DIV/0!	0	Autumn	2012-03-08	23:30	Night
10767	001	0294	No	0	0	0	0	0	0	0	0	0	0	0	0	0	0	0	#DIV/0!	#DIV/0!	0	Autumn	2012-03-09	0:00	Night
10774	001	0301	No	0	0	0	0	0	0	0	0	0	0	0	0	0	0	0	#DIV/0!	#DIV/0!	0	Autumn	2012-03-09	3:30	Night
10790	001	0317	No	0	0	0	0	0	0	0	0	0	0	0	0	0	0	0	#DIV/0!	#DIV/0!	0	Autumn	2012-03-09	11:30	Morning
10791	001	0318	No	0	0	0	0	0	0	0	0	0	0	0	0	0	0	0	#DIV/0!	#DIV/0!	0	Autumn	2012-03-09	12:00	Morning
10793	001	0320	No	0	0	0	0	0	0	0	0	0	0	0	0	0	0	0	#DIV/0!	#DIV/0!	0	Autumn	2012-03-09	13:00	Morning
10796	001	0323	No	0	0	0	0	0	0	0	0	0	0	0	0	0	0	0	#DIV/0!	#DIV/0!	0	Autumn	2012-03-09	14:30	Afternoon
10800	001	0327	No	0	0	0	0	0	0	0	0	0	0	0	0	0	0	0	#DIV/0!	#DIV/0!	0	Autumn	2012-03-09	16:30	Afternoon
10809	001	0336	No	0	0	0	0	0	0	0	0	0	0	0	0	0	0	0	#DIV/0!	#DIV/0!	0	Autumn	2012-03-09	21:00	Night
10822	001	0349	No	0	0	0	0	0	0	0	0	0	0	0	0	0	0	0	#DIV/0!	#DIV/0!	0	Autumn	2012-03-10	3:30	Night
10842	001	0369	No	0	0	0	0	0	0	0	0	0	0	0	0	0	0	0	#DIV/0!	#DIV/0!	0	Autumn	2012-03-10	13:30	Afternoon
10844	001	0371	No	0	0	0	0	0	0	0	0	0	0	0	0	0	0	0	#DIV/0!	#DIV/0!	0	Autumn	2012-03-10	14:30	Afternoon
10845	001	0372	No	0	0	0	0	0	0	0	0	0	0	0	0	0	0	0	#DIV/0!	#DIV/0!	0	Autumn	2012-03-10	15:00	Afternoon
10865	001	0392	No	0	0	0	0	0	0	0	0	0	0	0	0	0	0	0	#DIV/0!	#DIV/0!	0	Autumn	2012-03-11	1:00	Night
10878	001	0405	No	0	0	0	0	0	0	0	0	0	0	0	0	0	0	0	#DIV/0!	#DIV/0!	0	Autumn	2012-03-11	7:30	Morning
10899	001	0426	No	0	0	0	0	0	0	0	0	0	0	0	0	0	0	0	#DIV/0!	#DIV/0!	0	Autumn	2012-03-11	18:00	Afternoon
10904	001	0431	No	0	0	0	0	0	0	0	0	0	0	0	0	0	0	0	#DIV/0!	#DIV/0!	0	Autumn	2012-03-11	20:30	Dusk
10916	001	0443	No	0	0	0	0	0	0	0	0	0	0	0	0	0	0	0	#DIV/0!	#DIV/0!	0	Autumn	2012-03-12	2:30	Night
10925	001	0452	No	0	0	0	0	0	0	0	0	0	0	0	0	0	0	0	#DIV/0!	#DIV/0!	0	Autumn	2012-03-12	7:00	Morning
10926	001	0453	No	0	0	0	0	0	0	0	0	0	0	0	0	0	0	0	#DIV/0!	#DIV/0!	0	Autumn	2012-03-12	7:30	Morning
10941	001	0468	No	0	0	0	0	0	0	0	0	0	0	0	0	0	0	0	#DIV/0!	#DIV/0!	0	Autumn	2012-03-12	15:00	Afternoon
10947	001	0474	No	0	0	0	0	0	0	0	0	0	0	0	0	0	0	0	#DIV/0!	#DIV/0!	0	Autumn	2012-03-12	18:00	Afternoon
10954	001	0481	No	0	0	0	0	0	0	0	0	0	0	0	0	0	0	0	#DIV/0!	#DIV/0!	0	Autumn	2012-03-12	21:30	Night
10962	001	0489	No	0	0	0	0	0	0	0	0	0	0	0	0	0	0	0	#DIV/0!	#DIV/0!	0	Autumn	2012-03-13	1:30	Night
10964	001	0491	No	0	0	0	0	0	0	0	0	0	0	0	0	0	0	0	#DIV/0!	#DIV/0!	0	Autumn	2012-03-13	2:30	Night
10968	001	0495	No	0	0	0	0	0	0	0	0	0	0	0	0	0	0	0	#DIV/0!	#DIV/0!	0	Autumn	2012-03-13	4:30	Night
10972	001	0499	No	0	0	0	0	0	0	0	0	0	0	0	0	0	0	0	#DIV/0!	#DIV/0!	0	Autumn	2012-03-13	6:30	Dawn
10993	001	0520	No	0	0	0	0	0	0	0	0	0	0	0	0	0	0	0	#DIV/0!	#DIV/0!	0	Autumn	2012-03-13	17:00	Afternoon
11003	001	0530	No	0	0	0	0	0	0	0	0	0	0	0	0	0	0	0	#DIV/0!	#DIV/0!	0	Autumn	2012-03-13	22:00	Night
11010	001	0537	No	0	0	0	0	0	0	0	0	0	0	0	0	0	0	0	#DIV/0!	#DIV/0!	0	Autumn	2012-03-14	1:30	Night
11021	001	0548	No	0	0	0	0	0	0	0	0	0	0	0	0	0	0	0	#DIV/0!	#DIV/0!	0	Autumn	2012-03-14	7:00	Morning
11041	001	0568	No	0	0	0	0	0	0	0	0	0	0	0	0	0	0	0	#DIV/0!	#DIV/0!	0	Autumn	2012-03-14	17:00	Afternoon
11044	001	0571	No	0	0	0	0	0	0	0	0	0	0	0	0	0	0	0	#DIV/0!	#DIV/0!	0	Autumn	2012-03-14	18:30	Afternoon
11047	001	0574	No	0	0	0	0	0	0	0	0	0	0	0	0	0	0	0	#DIV/0!	#DIV/0!	0	Autumn	2012-03-14	20:00	Dusk
11050	001	0577	No	0	0	0	0	0	0	0	0	0	0	0	0	0	0	0	#DIV/0!	#DIV/0!	0	Autumn	2012-03-14	21:30	Night
11067	001	0594	No	0	0	0	0	0	0	0	0	0	0	0	0	0	0	0	#DIV/0!	#DIV/0!	0	Autumn	2012-03-15	6:00	Dawn
11068	001	0595	No	0	0	0	0	0	0	0	0	0	0	0	0	0	0	0	#DIV/0!	#DIV/0!	0	Autumn	2012-03-15	6:30	Dawn
11080	001	0607	No	0	0	0	0	0	0	0	0	0	0	0	0	0	0	0	#DIV/0!	#DIV/0!	0	Autumn	2012-03-15	12:30	Morning
11097	001	0624	No	0	0	0	0	0	0	0	0	0	0	0	0	0	0	0	#DIV/0!	#DIV/0!	0	Autumn	2012-03-15	21:00	Night
11111	001	0638	No	0	0	0	0	0	0	0	0	0	0	0	0	0	0	0	#DIV/0!	#DIV/0!	0	Autumn	2012-03-16	4:00	Night
11115	001	0642	No	0	0	0	0	0	0	0	0	0	0	0	0	0	0	0	#DIV/0!	#DIV/0!	0	Autumn	2012-03-16	6:00	Dawn
11139	001	0666	No	0	0	0	0	0	0	0	0	0	0	0	0	0	0	0	#DIV/0!	#DIV/0!	0	Autumn	2012-03-16	18:00	Afternoon
11143	001	0670	No	0	0	0	0	0	0	0	0	0	0	0	0	0	0	0	#DIV/0!	#DIV/0!	0	Autumn	2012-03-16	20:00	Dusk
11145	001	0672	No	0	0	0	0	0	0	0	0	0	0	0	0	0	0	0	#DIV/0!	#DIV/0!	0	Autumn	2012-03-16	21:00	Night
11157	001	0684	No	0	0	0	0	0	0	0	0	0	0	0	0	0	0	0	#DIV/0!	#DIV/0!	0	Autumn	2012-03-17	3:00	Night
11163	001	0690	No	0	0	0	0	0	0	0	0	0	0	0	0	0	0	0	#DIV/0!	#DIV/0!	0	Autumn	2012-03-17	6:00	Dawn
11165	001	0692	No	0	0	0	0	0	0	0	0	0	0	0	0	0	0	0	#DIV/0!	#DIV/0!	0	Autumn	2012-03-17	7:00	Morning
11167	001	0694	No	0	0	0	0	0	0	0	0	0	0	0	0	0	0	0	#DIV/0!	#DIV/0!	0	Autumn	2012-03-17	8:00	Morning
11178	001	0705	No	0	0	0	0	0	0	0	0	0	0	0	0	0	0	0	#DIV/0!	#DIV/0!	0	Autumn	2012-03-17	13:30	Afternoon
11193	001	0720	No	0	0	0	0	0	0	0	0	0	0	0	0	0	0	0	#DIV/0!	#DIV/0!	0	Autumn	2012-03-17	21:00	Night
11213	001	0740	No	0	0	0	0	0	0	0	0	0	0	0	0	0	0	0	#DIV/0!	#DIV/0!	0	Autumn	2012-03-18	7:00	Morning
11221	001	0748	No	0	0	0	0	0	0	0	0	0	0	0	0	0	0	0	#DIV/0!	#DIV/0!	0	Autumn	2012-03-18	11:00	Morning
11257	001	0784	No	0	0	0	0	0	0	0	0	0	0	0	0	0	0	0	#DIV/0!	#DIV/0!	0	Autumn	2012-03-19	5:00	Night
11266	001	0793	No	0	0	0	0	0	0	0	0	0	0	0	0	0	0	0	#DIV/0!	#DIV/0!	0	Autumn	2012-03-19	9:30	Morning
11269	001	0796	No	0	0	0	0	0	0	0	0	0	0	0	0	0	0	0	#DIV/0!	#DIV/0!	0	Autumn	2012-03-19	11:00	Morning
11279	001	0806	No	0	0	0	0	0	0	0	0	0	0	0	0	0	0	0	#DIV/0!	#DIV/0!	0	Autumn	2012-03-19	16:00	Afternoon
11280	001	0807	No	0	0	0	0	0	0	0	0	0	0	0	0	0	0	0	#DIV/0!	#DIV/0!	0	Autumn	2012-03-19	16:30	Afternoon
11286	001	0813	No	0	0	0	0	0	0	0	0	0	0	0	0	0	0	0	#DIV/0!	#DIV/0!	0	Autumn	2012-03-19	19:30	Dusk
11294	001	0821	No	0	0	0	0	0	0	0	0	0	0	0	0	0	0	0	#DIV/0!	#DIV/0!	0	Autumn	2012-03-19	23:30	Night
11295	001	0822	No	0	0	0	0	0	0	0	0	0	0	0	0	0	0	0	#DIV/0!	#DIV/0!	0	Autumn	2012-03-20	0:00	Night
11303	001	0830	No	0	0	0	0	0	0	0	0	0	0	0	0	0	0	0	#DIV/0!	#DIV/0!	0	Autumn	2012-03-20	4:00	Night
11316	001	0843	No	0	0	0	0	0	0	0	0	0	0	0	0	0	0	0	#DIV/0!	#DIV/0!	0	Autumn	2012-03-20	10:30	Morning
11318	001	0845	No	0	0	0	0	0	0	0	0	0	0	0	0	0	0	0	#DIV/0!	#DIV/0!	0	Autumn	2012-03-20	11:30	Morning
11326	001	0853	No	0	0	0	0	0	0	0	0	0	0	0	0	0	0	0	#DIV/0!	#DIV/0!	0	Autumn	2012-03-20	15:30	Afternoon
11345	001	0872	No	0	0	0	0	0	0	0	0	0	0	0	0	0	0	0	#DIV/0!	#DIV/0!	0	Autumn	2012-03-21	1:00	Night
11359	001	0886	No	0	0	0	0	0	0	0	0	0	0	0	0	0	0	0	#DIV/0!	#DIV/0!	0	Autumn	2012-03-21	8:00	Morning
11375	001	0902	No	0	0	0	0	0	0	0	0	0	0	0	0	0	0	0	#DIV/0!	#DIV/0!	0	Autumn	2012-03-21	16:00	Afternoon
11382	001	0909	No	0	0	0	0	0	0	0	0	0	0	0	0	0	0	0	#DIV/0!	#DIV/0!	0	Autumn	2012-03-21	19:30	Dusk
11416	001	0943	No	0	0	0	0	0	0	0	0	0	0	0	0	0	0	0	#DIV/0!	#DIV/0!	0	Autumn	2012-03-22	12:30	Morning
11421	001	0948	No	0	0	0	0	0	0	0	0	0	0	0	0	0	0	0	#DIV/0!	#DIV/0!	0	Autumn	2012-03-22	15:00	Afternoon
11437	001	0964	No	0	0	0	0	0	0	0	0	0	0	0	0	0	0	0	#DIV/0!	#DIV/0!	0	Autumn	2012-03-22	23:00	Night
11446	001	0973	No	0	0	0	0	0	0	0	0	0	0	0	0	0	0	0	#DIV/0!	#DIV/0!	0	Autumn	2012-03-23	3:30	Night
11458	001	0985	No	0	0	0	0	0	0	0	0	0	0	0	0	0	0	0	#DIV/0!	#DIV/0!	0	Autumn	2012-03-23	9:30	Morning
11460	001	0987	No	0	0	0	0	0	0	0	0	0	0	0	0	0	0	0	#DIV/0!	#DIV/0!	0	Autumn	2012-03-23	10:30	Morning
11464	001	0991	No	0	0	0	0	0	0	0	0	0	0	0	0	0	0	0	#DIV/0!	#DIV/0!	0	Autumn	2012-03-23	12:30	Morning
11478	001	1005	No	0	0	0	0	0	0	0	0	0	0	0	0	0	0	0	#DIV/0!	#DIV/0!	0	Autumn	2012-03-23	19:30	Dusk
11503	001	1030	No	0	0	0	0	0	0	0	0	0	0	0	0	0	0	0	#DIV/0!	#DIV/0!	0	Autumn	2012-03-24	8:00	Morning
11518	001	1045	No	0	0	0	0	0	0	0	0	0	0	0	0	0	0	0	#DIV/0!	#DIV/0!	0	Autumn	2012-03-24	15:30	Afternoon
11523	001	1050	No	0	0	0	0	0	0	0	0	0	0	0	0	0	0	0	#DIV/0!	#DIV/0!	0	Autumn	2012-03-24	18:00	Afternoon
11531	001	1058	No	0	0	0	0	0	0	0	0	0	0	0	0	0	0	0	#DIV/0!	#DIV/0!	0	Autumn	2012-03-24	22:00	Night
11540	001	1067	No	0	0	0	0	0	0	0	0	0	0	0	0	0	0	0	#DIV/0!	#DIV/0!	0	Autumn	2012-03-25	2:30	Night
11566	001	1093	No	0	0	0	0	0	0	0	0	0	0	0	0	0	0	0	#DIV/0!	#DIV/0!	0	Autumn	2012-03-25	15:30	Afternoon
11578	001	1105	No	0	0	0	0	0	0	0	0	0	0	0	0	0	0	0	#DIV/0!	#DIV/0!	0	Autumn	2012-03-25	21:30	Night
11616	001	1143	No	0	0	0	0	0	0	0	0	0	0	0	0	0	0	0	#DIV/0!	#DIV/0!	0	Autumn	2012-03-26	16:30	Afternoon
11637	001	1164	No	0	0	0	0	0	0	0	0	0	0	0	0	0	0	0	#DIV/0!	#DIV/0!	0	Autumn	2012-03-27	3:00	Night
11639	001	1166	No	0	0	0	0	0	0	0	0	0	0	0	0	0	0	0	#DIV/0!	#DIV/0!	0	Autumn	2012-03-27	4:00	Night
11657	001	1184	No	0	0	0	0	0	0	0	0	0	0	0	0	0	0	0	#DIV/0!	#DIV/0!	0	Autumn	2012-03-27	13:00	Afternoon
11668	001	1195	No	0	0	0	0	0	0	0	0	0	0	0	0	0	0	0	#DIV/0!	#DIV/0!	0	Autumn	2012-03-27	18:30	Afternoon
11676	001	1203	No	0	0	0	0	0	0	0	0	0	0	0	0	0	0	0	#DIV/0!	#DIV/0!	0	Autumn	2012-03-27	22:30	Night
11681	001	1208	No	0	0	0	0	0	0	0	0	0	0	0	0	0	0	0	#DIV/0!	#DIV/0!	0	Autumn	2012-03-28	1:00	Night
11703	001	1230	No	0	0	0	0	0	0	0	0	0	0	0	0	0	0	0	#DIV/0!	#DIV/0!	0	Autumn	2012-03-28	12:00	Morning
11709	001	1236	No	0	0	0	0	0	0	0	0	0	0	0	0	0	0	0	#DIV/0!	#DIV/0!	0	Autumn	2012-03-28	15:00	Afternoon
11713	001	1240	No	0	0	0	0	0	0	0	0	0	0	0	0	0	0	0	#DIV/0!	#DIV/0!	0	Autumn	2012-03-28	17:00	Afternoon
11719	001	1246	No	0	0	0	0	0	0	0	0	0	0	0	0	0	0	0	#DIV/0!	#DIV/0!	0	Autumn	2012-03-28	20:00	Night
11725	001	1252	No	0	0	0	0	0	0	0	0	0	0	0	0	0	0	0	#DIV/0!	#DIV/0!	0	Autumn	2012-03-28	23:00	Night
11746	001	1273	No	0	0	0	0	0	0	0	0	0	0	0	0	0	0	0	#DIV/0!	#DIV/0!	0	Autumn	2012-03-29	9:30	Morning
11766	001	1293	No	0	0	0	0	0	0	0	0	0	0	0	0	0	0	0	#DIV/0!	#DIV/0!	0	Autumn	2012-03-29	19:30	Dusk
11770	001	1297	No	0	0	0	0	0	0	0	0	0	0	0	0	0	0	0	#DIV/0!	#DIV/0!	0	Autumn	2012-03-29	21:30	Night
11784	001	1311	No	0	0	0	0	0	0	0	0	0	0	0	0	0	0	0	#DIV/0!	#DIV/0!	0	Autumn	2012-03-30	4:30	Night
11791	001	1318	No	0	0	0	0	0	0	0	0	0	0	0	0	0	0	0	#DIV/0!	#DIV/0!	0	Autumn	2012-03-30	8:00	Morning
11792	001	1319	No	0	0	0	0	0	0	0	0	0	0	0	0	0	0	0	#DIV/0!	#DIV/0!	0	Autumn	2012-03-30	8:30	Morning
11824	001	1351	No	0	0	0	0	0	0	0	0	0	0	0	0	0	0	0	#DIV/0!	#DIV/0!	0	Autumn	2012-03-31	0:30	Night
11845	001	1372	No	0	0	0	0	0	0	0	0	0	0	0	0	0	0	0	#DIV/0!	#DIV/0!	0	Autumn	2012-03-31	11:00	Morning
11865	001	1392	No	0	0	0	0	0	0	0	0	0	0	0	0	0	0	0	#DIV/0!	#DIV/0!	0	Autumn	2012-03-31	21:00	Night
11901	001	1428	No	0	0	0	0	0	0	0	0	0	0	0	0	0	0	0	#DIV/0!	#DIV/0!	0	Autumn	2012-04-01	15:00	Afternoon
11917	001	1444	No	0	0	0	0	0	0	0	0	0	0	0	0	0	0	0	#DIV/0!	#DIV/0!	0	Autumn	2012-04-01	23:00	Night
11920	001	1447	No	0	0	0	0	0	0	0	0	0	0	0	0	0	0	0	#DIV/0!	#DIV/0!	0	Autumn	2012-04-02	0:30	Night
11932	001	1459	No	0	0	0	0	0	0	0	0	0	0	0	0	0	0	0	#DIV/0!	#DIV/0!	0	Autumn	2012-04-02	6:30	Dawn
11935	001	1462	No	0	0	0	0	0	0	0	0	0	0	0	0	0	0	0	#DIV/0!	#DIV/0!	0	Autumn	2012-04-02	8:00	Morning
11942	001	1469	No	0	0	0	0	0	0	0	0	0	0	0	0	0	0	0	#DIV/0!	#DIV/0!	0	Autumn	2012-04-02	11:30	Morning
11948	001	1475	No	0	0	0	0	0	0	0	0	0	0	0	0	0	0	0	#DIV/0!	#DIV/0!	0	Autumn	2012-04-02	14:30	Afternoon
11961	001	1488	No	0	0	0	0	0	0	0	0	0	0	0	0	0	0	0	#DIV/0!	#DIV/0!	0	Autumn	2012-04-02	21:00	Night
11971	001	1498	No	0	0	0	0	0	0	0	0	0	0	0	0	0	0	0	#DIV/0!	#DIV/0!	0	Autumn	2012-04-03	2:00	Night
11986	001	1513	No	0	0	0	0	0	0	0	0	0	0	0	0	0	0	0	#DIV/0!	#DIV/0!	0	Autumn	2012-04-03	9:30	Morning
12001	001	1528	No	0	0	0	0	0	0	0	0	0	0	0	0	0	0	0	#DIV/0!	#DIV/0!	0	Autumn	2012-04-03	17:00	Afternoon
12006	001	1533	No	0	0	0	0	0	0	0	0	0	0	0	0	0	0	0	#DIV/0!	#DIV/0!	0	Autumn	2012-04-03	19:30	Dusk
12015	001	1542	No	0	0	0	0	0	0	0	0	0	0	0	0	0	0	0	#DIV/0!	#DIV/0!	0	Autumn	2012-04-04	0:00	Night
12019	001	1546	No	0	0	0	0	0	0	0	0	0	0	0	0	0	0	0	#DIV/0!	#DIV/0!	0	Autumn	2012-04-04	2:00	Night
12022	001	1549	No	0	0	0	0	0	0	0	0	0	0	0	0	0	0	0	#DIV/0!	#DIV/0!	0	Autumn	2012-04-04	3:30	Night
12026	001	1553	No	0	0	0	0	0	0	0	0	0	0	0	0	0	0	0	#DIV/0!	#DIV/0!	0	Autumn	2012-04-04	5:30	Night
12036	001	1563	No	0	0	0	0	0	0	0	0	0	0	0	0	0	0	0	#DIV/0!	#DIV/0!	0	Autumn	2012-04-04	10:30	Morning
12045	001	1572	No	0	0	0	0	0	0	0	0	0	0	0	0	0	0	0	#DIV/0!	#DIV/0!	0	Autumn	2012-04-04	15:00	Afternoon
12052	001	1579	No	0	0	0	0	0	0	0	0	0	0	0	0	0	0	0	#DIV/0!	#DIV/0!	0	Autumn	2012-04-04	18:30	Afternoon
12055	001	1582	No	0	0	0	0	0	0	0	0	0	0	0	0	0	0	0	#DIV/0!	#DIV/0!	0	Autumn	2012-04-04	20:00	Night
12056	001	1583	No	0	0	0	0	0	0	0	0	0	0	0	0	0	0	0	#DIV/0!	#DIV/0!	0	Autumn	2012-04-04	20:30	Night
12078	001	1605	No	0	0	0	0	0	0	0	0	0	0	0	0	0	0	0	#DIV/0!	#DIV/0!	0	Autumn	2012-04-05	7:30	Morning
12086	001	1613	No	0	0	0	0	0	0	0	0	0	0	0	0	0	0	0	#DIV/0!	#DIV/0!	0	Autumn	2012-04-05	11:30	Morning
12094	001	1621	No	0	0	0	0	0	0	0	0	0	0	0	0	0	0	0	#DIV/0!	#DIV/0!	0	Autumn	2012-04-05	15:30	Afternoon
12101	001	1628	No	0	0	0	0	0	0	0	0	0	0	0	0	0	0	0	#DIV/0!	#DIV/0!	0	Autumn	2012-04-05	19:00	Dusk
12120	001	1647	No	0	0	0	0	0	0	0	0	0	0	0	0	0	0	0	#DIV/0!	#DIV/0!	0	Autumn	2012-04-06	4:30	Night
12134	001	1661	No	0	0	0	0	0	0	0	0	0	0	0	0	0	0	0	#DIV/0!	#DIV/0!	0	Autumn	2012-04-06	11:30	Morning
12142	001	1669	No	0	0	0	0	0	0	0	0	0	0	0	0	0	0	0	#DIV/0!	#DIV/0!	0	Autumn	2012-04-06	15:30	Afternoon
12158	001	1685	No	0	0	0	0	0	0	0	0	0	0	0	0	0	0	0	#DIV/0!	#DIV/0!	0	Autumn	2012-04-06	23:30	Night
12170	001	1697	No	0	0	0	0	0	0	0	0	0	0	0	0	0	0	0	#DIV/0!	#DIV/0!	0	Autumn	2012-04-07	5:30	Night
12179	001	1706	No	0	0	0	0	0	0	0	0	0	0	0	0	0	0	0	#DIV/0!	#DIV/0!	0	Autumn	2012-04-07	10:00	Morning
12185	001	1712	No	0	0	0	0	0	0	0	0	0	0	0	0	0	0	0	#DIV/0!	#DIV/0!	0	Autumn	2012-04-07	13:00	Afternoon
12187	001	1714	No	0	0	0	0	0	0	0	0	0	0	0	0	0	0	0	#DIV/0!	#DIV/0!	0	Autumn	2012-04-07	14:00	Afternoon
12191	001	1718	No	0	0	0	0	0	0	0	0	0	0	0	0	0	0	0	#DIV/0!	#DIV/0!	0	Autumn	2012-04-07	16:00	Afternoon
12199	001	1726	No	0	0	0	0	0	0	0	0	0	0	0	0	0	0	0	#DIV/0!	#DIV/0!	0	Autumn	2012-04-07	20:00	Night
12200	001	1727	No	0	0	0	0	0	0	0	0	0	0	0	0	0	0	0	#DIV/0!	#DIV/0!	0	Autumn	2012-04-07	20:30	Night
12217	001	1744	No	0	0	0	0	0	0	0	0	0	0	0	0	0	0	0	#DIV/0!	#DIV/0!	0	Autumn	2012-04-08	5:00	Night
12227	001	1754	No	0	0	0	0	0	0	0	0	0	0	0	0	0	0	0	#DIV/0!	#DIV/0!	0	Autumn	2012-04-08	10:00	Morning
12243	001	1770	No	0	0	0	0	0	0	0	0	0	0	0	0	0	0	0	#DIV/0!	#DIV/0!	0	Autumn	2012-04-08	18:00	Afternoon
12247	001	1774	No	0	0	0	0	0	0	0	0	0	0	0	0	0	0	0	#DIV/0!	#DIV/0!	0	Autumn	2012-04-08	20:00	Night
12299	001	1826	No	0	0	0	0	0	0	0	0	0	0	0	0	0	0	0	#DIV/0!	#DIV/0!	0	Autumn	2012-04-09	22:00	Night
12302	001	1829	No	0	0	0	0	0	0	0	0	0	0	0	0	0	0	0	#DIV/0!	#DIV/0!	0	Autumn	2012-04-09	23:30	Night
12339	001	1866	No	0	0	0	0	0	0	0	0	0	0	0	0	0	0	0	#DIV/0!	#DIV/0!	0	Autumn	2012-04-10	18:00	Afternoon
12340	001	1867	No	0	0	0	0	0	0	0	0	0	0	0	0	0	0	0	#DIV/0!	#DIV/0!	0	Autumn	2012-04-10	18:30	Dusk
12343	001	1870	No	0	0	0	0	0	0	0	0	0	0	0	0	0	0	0	#DIV/0!	#DIV/0!	0	Autumn	2012-04-10	20:00	Night
12349	001	1876	No	0	0	0	0	0	0	0	0	0	0	0	0	0	0	0	#DIV/0!	#DIV/0!	0	Autumn	2012-04-10	23:00	Night
12356	001	1883	No	0	0	0	0	0	0	0	0	0	0	0	0	0	0	0	#DIV/0!	#DIV/0!	0	Autumn	2012-04-11	2:30	Night
12360	001	1887	No	0	0	0	0	0	0	0	0	0	0	0	0	0	0	0	#DIV/0!	#DIV/0!	0	Autumn	2012-04-11	4:30	Night
12363	001	1890	No	0	0	0	0	0	0	0	0	0	0	0	0	0	0	0	#DIV/0!	#DIV/0!	0	Autumn	2012-04-11	6:00	Night
12366	001	1893	No	0	0	0	0	0	0	0	0	0	0	0	0	0	0	0	#DIV/0!	#DIV/0!	0	Autumn	2012-04-11	7:30	Dawn
12376	001	1903	No	0	0	0	0	0	0	0	0	0	0	0	0	0	0	0	#DIV/0!	#DIV/0!	0	Autumn	2012-04-11	12:30	Morning
12381	001	1908	No	0	0	0	0	0	0	0	0	0	0	0	0	0	0	0	#DIV/0!	#DIV/0!	0	Autumn	2012-04-11	15:00	Afternoon
12403	001	1930	No	0	0	0	0	0	0	0	0	0	0	0	0	0	0	0	#DIV/0!	#DIV/0!	0	Autumn	2012-04-12	2:00	Night
12416	001	1943	No	0	0	0	0	0	0	0	0	0	0	0	0	0	0	0	#DIV/0!	#DIV/0!	0	Autumn	2012-04-12	8:30	Morning
12425	001	1952	No	0	0	0	0	0	0	0	0	0	0	0	0	0	0	0	#DIV/0!	#DIV/0!	0	Autumn	2012-04-12	13:00	Afternoon
12432	001	1959	No	0	0	0	0	0	0	0	0	0	0	0	0	0	0	0	#DIV/0!	#DIV/0!	0	Autumn	2012-04-12	16:30	Afternoon
12433	001	1960	No	0	0	0	0	0	0	0	0	0	0	0	0	0	0	0	#DIV/0!	#DIV/0!	0	Autumn	2012-04-12	17:00	Afternoon
12448	001	1975	No	0	0	0	0	0	0	0	0	0	0	0	0	0	0	0	#DIV/0!	#DIV/0!	0	Autumn	2012-04-13	0:30	Night
12464	001	1991	No	0	0	0	0	0	0	0	0	0	0	0	0	0	0	0	#DIV/0!	#DIV/0!	0	Autumn	2012-04-13	8:30	Morning
12466	001	1993	No	0	0	0	0	0	0	0	0	0	0	0	0	0	0	0	#DIV/0!	#DIV/0!	0	Autumn	2012-04-13	9:30	Morning
12474	001	2001	No	0	0	0	0	0	0	0	0	0	0	0	0	0	0	0	#DIV/0!	#DIV/0!	0	Autumn	2012-04-13	13:30	Afternoon
12485	001	2012	No	0	0	0	0	0	0	0	0	0	0	0	0	0	0	0	#DIV/0!	#DIV/0!	0	Autumn	2012-04-13	19:00	Dusk
12487	001	2014	No	0	0	0	0	0	0	0	0	0	0	0	0	0	0	0	#DIV/0!	#DIV/0!	0	Autumn	2012-04-13	20:00	Night
12488	001	2015	No	0	0	0	0	0	0	0	0	0	0	0	0	0	0	0	#DIV/0!	#DIV/0!	0	Autumn	2012-04-13	20:30	Night
12505	001	2032	No	0	0	0	0	0	0	0	0	0	0	0	0	0	0	0	#DIV/0!	#DIV/0!	0	Autumn	2012-04-14	5:00	Night
12521	001	2048	No	0	0	0	0	0	0	0	0	0	0	0	0	0	0	0	#DIV/0!	#DIV/0!	0	Autumn	2012-04-14	13:00	Afternoon
12525	001	2052	No	0	0	0	0	0	0	0	0	0	0	0	0	0	0	0	#DIV/0!	#DIV/0!	0	Autumn	2012-04-14	15:00	Afternoon
12553	001	2080	No	0	0	0	0	0	0	0	0	0	0	0	0	0	0	0	#DIV/0!	#DIV/0!	0	Autumn	2012-04-15	5:00	Night
12590	001	2117	No	0	0	0	0	0	0	0	0	0	0	0	0	0	0	0	#DIV/0!	#DIV/0!	0	Autumn	2012-04-15	23:30	Night
12593	001	2120	No	0	0	0	0	0	0	0	0	0	0	0	0	0	0	0	#DIV/0!	#DIV/0!	0	Autumn	2012-04-16	1:00	Night
12602	001	2129	No	0	0	0	0	0	0	0	0	0	0	0	0	0	0	0	#DIV/0!	#DIV/0!	0	Autumn	2012-04-16	5:30	Night
12608	001	2135	No	0	0	0	0	0	0	0	0	0	0	0	0	0	0	0	#DIV/0!	#DIV/0!	0	Autumn	2012-04-16	8:30	Morning
12610	001	2137	No	0	0	0	0	0	0	0	0	0	0	0	0	0	0	0	#DIV/0!	#DIV/0!	0	Autumn	2012-04-16	9:30	Morning
12623	001	2150	No	0	0	0	0	0	0	0	0	0	0	0	0	0	0	0	#DIV/0!	#DIV/0!	0	Autumn	2012-04-16	16:00	Afternoon
12624	001	2151	No	0	0	0	0	0	0	0	0	0	0	0	0	0	0	0	#DIV/0!	#DIV/0!	0	Autumn	2012-04-16	16:30	Afternoon
12625	001	2152	No	0	0	0	0	0	0	0	0	0	0	0	0	0	0	0	#DIV/0!	#DIV/0!	0	Autumn	2012-04-16	17:00	Afternoon
12630	001	2157	No	0	0	0	0	0	0	0	0	0	0	0	0	0	0	0	#DIV/0!	#DIV/0!	0	Autumn	2012-04-16	19:30	Night
12635	001	2162	No	0	0	0	0	0	0	0	0	0	0	0	0	0	0	0	#DIV/0!	#DIV/0!	0	Autumn	2012-04-16	22:00	Night
12638	001	2165	No	0	0	0	0	0	0	0	0	0	0	0	0	0	0	0	#DIV/0!	#DIV/0!	0	Autumn	2012-04-16	23:30	Night
12641	001	2168	No	0	0	0	0	0	0	0	0	0	0	0	0	0	0	0	#DIV/0!	#DIV/0!	0	Autumn	2012-04-17	1:00	Night
12642	001	2169	No	0	0	0	0	0	0	0	0	0	0	0	0	0	0	0	#DIV/0!	#DIV/0!	0	Autumn	2012-04-17	1:30	Night
12646	001	2173	No	0	0	0	0	0	0	0	0	0	0	0	0	0	0	0	#DIV/0!	#DIV/0!	0	Autumn	2012-04-17	3:30	Night
12656	001	2183	No	0	0	0	0	0	0	0	0	0	0	0	0	0	0	0	#DIV/0!	#DIV/0!	0	Autumn	2012-04-17	8:30	Morning
12666	001	2193	No	0	0	0	0	0	0	0	0	0	0	0	0	0	0	0	#DIV/0!	#DIV/0!	0	Autumn	2012-04-17	13:30	Afternoon
12668	001	2195	No	0	0	0	0	0	0	0	0	0	0	0	0	0	0	0	#DIV/0!	#DIV/0!	0	Autumn	2012-04-17	14:30	Afternoon
12682	001	2209	No	0	0	0	0	0	0	0	0	0	0	0	0	0	0	0	#DIV/0!	#DIV/0!	0	Autumn	2012-04-17	21:30	Night
12687	001	2214	No	0	0	0	0	0	0	0	0	0	0	0	0	0	0	0	#DIV/0!	#DIV/0!	0	Autumn	2012-04-18	0:00	Night
12692	001	2219	No	0	0	0	0	0	0	0	0	0	0	0	0	0	0	0	#DIV/0!	#DIV/0!	0	Autumn	2012-04-18	2:30	Night
12693	001	2220	No	0	0	0	0	0	0	0	0	0	0	0	0	0	0	0	#DIV/0!	#DIV/0!	0	Autumn	2012-04-18	3:00	Night
12694	001	2221	No	0	0	0	0	0	0	0	0	0	0	0	0	0	0	0	#DIV/0!	#DIV/0!	0	Autumn	2012-04-18	3:30	Night
12705	001	2232	No	0	0	0	0	0	0	0	0	0	0	0	0	0	0	0	#DIV/0!	#DIV/0!	0	Autumn	2012-04-18	9:00	Morning
12708	001	2235	No	0	0	0	0	0	0	0	0	0	0	0	0	0	0	0	#DIV/0!	#DIV/0!	0	Autumn	2012-04-18	10:30	Morning
12714	001	2241	No	0	0	0	0	0	0	0	0	0	0	0	0	0	0	0	#DIV/0!	#DIV/0!	0	Autumn	2012-04-18	13:30	Afternoon
12722	001	2249	No	0	0	0	0	0	0	0	0	0	0	0	0	0	0	0	#DIV/0!	#DIV/0!	0	Autumn	2012-04-18	17:30	Afternoon
12732	001	2259	No	0	0	0	0	0	0	0	0	0	0	0	0	0	0	0	#DIV/0!	#DIV/0!	0	Autumn	2012-04-18	22:30	Night
12737	001	2264	No	0	0	0	0	0	0	0	0	0	0	0	0	0	0	0	#DIV/0!	#DIV/0!	0	Autumn	2012-04-19	1:00	Night
12746	001	2273	No	0	0	0	0	0	0	0	0	0	0	0	0	0	0	0	#DIV/0!	#DIV/0!	0	Autumn	2012-04-19	5:30	Night
12764	001	2291	No	0	0	0	0	0	0	0	0	0	0	0	0	0	0	0	#DIV/0!	#DIV/0!	0	Autumn	2012-04-19	14:30	Afternoon
12782	001	2309	No	0	0	0	0	0	0	0	0	0	0	0	0	0	0	0	#DIV/0!	#DIV/0!	0	Autumn	2012-04-19	23:30	Night
12828	001	2355	No	0	0	0	0	0	0	0	0	0	0	0	0	0	0	0	#DIV/0!	#DIV/0!	0	Autumn	2012-04-20	22:30	Night
12837	001	2364	No	0	0	0	0	0	0	0	0	0	0	0	0	0	0	0	#DIV/0!	#DIV/0!	0	Autumn	2012-04-21	3:00	Night
12845	001	2372	No	0	0	0	0	0	0	0	0	0	0	0	0	0	0	0	#DIV/0!	#DIV/0!	0	Autumn	2012-04-21	7:00	Dawn
12846	001	2373	No	0	0	0	0	0	0	0	0	0	0	0	0	0	0	0	#DIV/0!	#DIV/0!	0	Autumn	2012-04-21	7:30	Dawn
12858	001	2385	No	0	0	0	0	0	0	0	0	0	0	0	0	0	0	0	#DIV/0!	#DIV/0!	0	Autumn	2012-04-21	13:30	Afternoon
12860	001	2387	No	0	0	0	0	0	0	0	0	0	0	0	0	0	0	0	#DIV/0!	#DIV/0!	0	Autumn	2012-04-21	14:30	Afternoon
12874	001	2401	No	0	0	0	0	0	0	0	0	0	0	0	0	0	0	0	#DIV/0!	#DIV/0!	0	Autumn	2012-04-21	21:30	Night
12884	001	2411	No	0	0	0	0	0	0	0	0	0	0	0	0	0	0	0	#DIV/0!	#DIV/0!	0	Autumn	2012-04-22	2:30	Night
12906	001	2433	No	0	0	0	0	0	0	0	0	0	0	0	0	0	0	0	#DIV/0!	#DIV/0!	0	Autumn	2012-04-22	13:30	Afternoon
12907	001	2434	No	0	0	0	0	0	0	0	0	0	0	0	0	0	0	0	#DIV/0!	#DIV/0!	0	Autumn	2012-04-22	14:00	Afternoon
12912	001	2439	No	0	0	0	0	0	0	0	0	0	0	0	0	0	0	0	#DIV/0!	#DIV/0!	0	Autumn	2012-04-22	16:30	Afternoon
12916	001	2443	No	0	0	0	0	0	0	0	0	0	0	0	0	0	0	0	#DIV/0!	#DIV/0!	0	Autumn	2012-04-22	18:30	Dusk
12922	001	2449	No	0	0	0	0	0	0	0	0	0	0	0	0	0	0	0	#DIV/0!	#DIV/0!	0	Autumn	2012-04-22	21:30	Night
12964	001	2491	No	0	0	0	0	0	0	0	0	0	0	0	0	0	0	0	#DIV/0!	#DIV/0!	0	Autumn	2012-04-23	18:30	Dusk
12976	001	2503	No	0	0	0	0	0	0	0	0	0	0	0	0	0	0	0	#DIV/0!	#DIV/0!	0	Autumn	2012-04-24	0:30	Night
13005	001	2532	No	0	0	0	0	0	0	0	0	0	0	0	0	0	0	0	#DIV/0!	#DIV/0!	0	Autumn	2012-04-24	15:00	Afternoon
13013	001	2540	No	0	0	0	0	0	0	0	0	0	0	0	0	0	0	0	#DIV/0!	#DIV/0!	0	Autumn	2012-04-24	19:00	Dusk
13023	001	2550	No	0	0	0	0	0	0	0	0	0	0	0	0	0	0	0	#DIV/0!	#DIV/0!	0	Autumn	2012-04-25	0:00	Night
13027	001	2554	No	0	0	0	0	0	0	0	0	0	0	0	0	0	0	0	#DIV/0!	#DIV/0!	0	Autumn	2012-04-25	2:00	Night
13063	001	2590	No	0	0	0	0	0	0	0	0	0	0	0	0	0	0	0	#DIV/0!	#DIV/0!	0	Autumn	2012-04-25	20:00	Night
13084	001	2611	No	0	0	0	0	0	0	0	0	0	0	0	0	0	0	0	#DIV/0!	#DIV/0!	0	Autumn	2012-04-26	6:30	Dawn
13093	001	2620	No	0	0	0	0	0	0	0	0	0	0	0	0	0	0	0	#DIV/0!	#DIV/0!	0	Autumn	2012-04-26	11:00	Morning
13100	001	2627	No	0	0	0	0	0	0	0	0	0	0	0	0	0	0	0	#DIV/0!	#DIV/0!	0	Autumn	2012-04-26	14:30	Afternoon
13125	001	2652	No	0	0	0	0	0	0	0	0	0	0	0	0	0	0	0	#DIV/0!	#DIV/0!	0	Autumn	2012-04-27	3:00	Night
13129	001	2656	No	0	0	0	0	0	0	0	0	0	0	0	0	0	0	0	#DIV/0!	#DIV/0!	0	Autumn	2012-04-27	5:00	Night
13130	001	2657	No	0	0	0	0	0	0	0	0	0	0	0	0	0	0	0	#DIV/0!	#DIV/0!	0	Autumn	2012-04-27	5:30	Night
13146	001	2673	No	0	0	0	0	0	0	0	0	0	0	0	0	0	0	0	#DIV/0!	#DIV/0!	0	Autumn	2012-04-27	13:30	Afternoon
13149	001	2676	No	0	0	0	0	0	0	0	0	0	0	0	0	0	0	0	#DIV/0!	#DIV/0!	0	Autumn	2012-04-27	15:00	Afternoon
13150	001	2677	No	0	0	0	0	0	0	0	0	0	0	0	0	0	0	0	#DIV/0!	#DIV/0!	0	Autumn	2012-04-27	15:30	Afternoon
13168	001	2695	No	0	0	0	0	0	0	0	0	0	0	0	0	0	0	0	#DIV/0!	#DIV/0!	0	Autumn	2012-04-28	0:30	Night
13172	001	2699	No	0	0	0	0	0	0	0	0	0	0	0	0	0	0	0	#DIV/0!	#DIV/0!	0	Autumn	2012-04-28	2:30	Night
13182	001	2709	No	0	0	0	0	0	0	0	0	0	0	0	0	0	0	0	#DIV/0!	#DIV/0!	0	Autumn	2012-04-28	7:30	Dawn
13197	001	2724	No	0	0	0	0	0	0	0	0	0	0	0	0	0	0	0	#DIV/0!	#DIV/0!	0	Autumn	2012-04-28	15:00	Afternoon
13205	001	2732	No	0	0	0	0	0	0	0	0	0	0	0	0	0	0	0	#DIV/0!	#DIV/0!	0	Autumn	2012-04-28	19:00	Dusk
13216	001	2743	No	0	0	0	0	0	0	0	0	0	0	0	0	0	0	0	#DIV/0!	#DIV/0!	0	Autumn	2012-04-29	0:30	Night
13228	001	2755	No	0	0	0	0	0	0	0	0	0	0	0	0	0	0	0	#DIV/0!	#DIV/0!	0	Autumn	2012-04-29	6:30	Night
13244	001	2771	No	0	0	0	0	0	0	0	0	0	0	0	0	0	0	0	#DIV/0!	#DIV/0!	0	Autumn	2012-04-29	14:30	Afternoon
13245	001	2772	No	0	0	0	0	0	0	0	0	0	0	0	0	0	0	0	#DIV/0!	#DIV/0!	0	Autumn	2012-04-29	15:00	Afternoon
13246	001	2773	No	0	0	0	0	0	0	0	0	0	0	0	0	0	0	0	#DIV/0!	#DIV/0!	0	Autumn	2012-04-29	15:30	Afternoon
13251	001	2778	No	0	0	0	0	0	0	0	0	0	0	0	0	0	0	0	#DIV/0!	#DIV/0!	0	Autumn	2012-04-29	18:00	Dusk
13253	001	2780	No	0	0	0	0	0	0	0	0	0	0	0	0	0	0	0	#DIV/0!	#DIV/0!	0	Autumn	2012-04-29	19:00	Night
13263	001	2790	No	0	0	0	0	0	0	0	0	0	0	0	0	0	0	0	#DIV/0!	#DIV/0!	0	Autumn	2012-04-30	0:00	Night
13305	001	2832	No	0	0	0	0	0	0	0	0	0	0	0	0	0	0	0	#DIV/0!	#DIV/0!	0	Autumn	2012-04-30	21:00	Night
13308	001	2835	No	0	0	0	0	0	0	0	0	0	0	0	0	0	0	0	#DIV/0!	#DIV/0!	0	Autumn	2012-04-30	22:30	Night
13311	001	2838	No	0	0	0	0	0	0	0	0	0	0	0	0	0	0	0	#DIV/0!	#DIV/0!	0	Autumn	2012-05-01	0:00	Night
13325	001	2852	No	0	0	0	0	0	0	0	0	0	0	0	0	0	0	0	#DIV/0!	#DIV/0!	0	Autumn	2012-05-01	7:00	Dawn
13340	001	2867	No	0	0	0	0	0	0	0	0	0	0	0	0	0	0	0	#DIV/0!	#DIV/0!	0	Autumn	2012-05-01	14:30	Afternoon
13346	001	2873	No	0	0	0	0	0	0	0	0	0	0	0	0	0	0	0	#DIV/0!	#DIV/0!	0	Autumn	2012-05-01	17:30	Afternoon
13357	001	2884	No	0	0	0	0	0	0	0	0	0	0	0	0	0	0	0	#DIV/0!	#DIV/0!	0	Autumn	2012-05-01	23:00	Night
13383	001	2910	No	0	0	0	0	0	0	0	0	0	0	0	0	0	0	0	#DIV/0!	#DIV/0!	0	Autumn	2012-05-02	12:00	Morning
13400	001	2927	No	0	0	0	0	0	0	0	0	0	0	0	0	0	0	0	#DIV/0!	#DIV/0!	0	Autumn	2012-05-02	20:30	Night
13417	001	2944	No	0	0	0	0	0	0	0	0	0	0	0	0	0	0	0	#DIV/0!	#DIV/0!	0	Autumn	2012-05-03	5:00	Night
13430	001	2957	No	0	0	0	0	0	0	0	0	0	0	0	0	0	0	0	#DIV/0!	#DIV/0!	0	Autumn	2012-05-03	11:30	Morning
13438	001	2965	No	0	0	0	0	0	0	0	0	0	0	0	0	0	0	0	#DIV/0!	#DIV/0!	0	Autumn	2012-05-03	15:30	Afternoon
13448	001	2975	No	0	0	0	0	0	0	0	0	0	0	0	0	0	0	0	#DIV/0!	#DIV/0!	0	Autumn	2012-05-03	20:30	Night
13462	001	2989	No	0	0	0	0	0	0	0	0	0	0	0	0	0	0	0	#DIV/0!	#DIV/0!	0	Autumn	2012-05-04	3:30	Night
13467	001	2994	No	0	0	0	0	0	0	0	0	0	0	0	0	0	0	0	#DIV/0!	#DIV/0!	0	Autumn	2012-05-04	6:00	Night
13481	001	3008	No	0	0	0	0	0	0	0	0	0	0	0	0	0	0	0	#DIV/0!	#DIV/0!	0	Autumn	2012-05-04	13:00	Afternoon
13482	001	3009	No	0	0	0	0	0	0	0	0	0	0	0	0	0	0	0	#DIV/0!	#DIV/0!	0	Autumn	2012-05-04	13:30	Afternoon
13493	001	3020	No	0	0	0	0	0	0	0	0	0	0	0	0	0	0	0	#DIV/0!	#DIV/0!	0	Autumn	2012-05-04	19:00	Night
13516	001	3043	No	0	0	0	0	0	0	0	0	0	0	0	0	0	0	0	#DIV/0!	#DIV/0!	0	Autumn	2012-05-05	6:30	Night
13525	001	3052	No	0	0	0	0	0	0	0	0	0	0	0	0	0	0	0	#DIV/0!	#DIV/0!	0	Autumn	2012-05-05	11:00	Morning
13537	001	3064	No	0	0	0	0	0	0	0	0	0	0	0	0	0	0	0	#DIV/0!	#DIV/0!	0	Autumn	2012-05-05	17:00	Afternoon
13553	001	3080	No	0	0	0	0	0	0	0	0	0	0	0	0	0	0	0	#DIV/0!	#DIV/0!	0	Autumn	2012-05-06	1:00	Night
13566	001	3093	No	0	0	0	0	0	0	0	0	0	0	0	0	0	0	0	#DIV/0!	#DIV/0!	0	Autumn	2012-05-06	7:30	Dawn
13612	001	3139	No	0	0	0	0	0	0	0	0	0	0	0	0	0	0	0	#DIV/0!	#DIV/0!	0	Autumn	2012-05-07	6:30	Night
13624	001	3151	No	0	0	0	0	0	0	0	0	0	0	0	0	0	0	0	#DIV/0!	#DIV/0!	0	Autumn	2012-05-07	12:30	Morning
13634	001	3161	No	0	0	0	0	0	0	0	0	0	0	0	0	0	0	0	#DIV/0!	#DIV/0!	0	Autumn	2012-05-07	17:30	Dusk
13640	001	3167	No	0	0	0	0	0	0	0	0	0	0	0	0	0	0	0	#DIV/0!	#DIV/0!	0	Autumn	2012-05-07	20:30	Night
13648	001	3175	No	0	0	0	0	0	0	0	0	0	0	0	0	0	0	0	#DIV/0!	#DIV/0!	0	Autumn	2012-05-08	0:30	Night
13660	001	3187	No	0	0	0	0	0	0	0	0	0	0	0	0	0	0	0	#DIV/0!	#DIV/0!	0	Autumn	2012-05-08	6:30	Night
13682	001	3209	No	0	0	0	0	0	0	0	0	0	0	0	0	0	0	0	#DIV/0!	#DIV/0!	0	Autumn	2012-05-08	17:30	Dusk
13696	001	3223	No	0	0	0	0	0	0	0	0	0	0	0	0	0	0	0	#DIV/0!	#DIV/0!	0	Autumn	2012-05-09	0:30	Night
13714	001	3241	No	0	0	0	0	0	0	0	0	0	0	0	0	0	0	0	#DIV/0!	#DIV/0!	0	Autumn	2012-05-09	9:30	Morning
13723	001	3250	No	0	0	0	0	0	0	0	0	0	0	0	0	0	0	0	#DIV/0!	#DIV/0!	0	Autumn	2012-05-09	14:00	Afternoon
13728	001	3255	No	0	0	0	0	0	0	0	0	0	0	0	0	0	0	0	#DIV/0!	#DIV/0!	0	Autumn	2012-05-09	16:30	Afternoon
13734	001	3261	No	0	0	0	0	0	0	0	0	0	0	0	0	0	0	0	#DIV/0!	#DIV/0!	0	Autumn	2012-05-09	19:30	Night
13778	001	3305	No	0	0	0	0	0	0	0	0	0	0	0	0	0	0	0	#DIV/0!	#DIV/0!	0	Autumn	2012-05-10	17:30	Dusk
13796	001	3323	No	0	0	0	0	0	0	0	0	0	0	0	0	0	0	0	#DIV/0!	#DIV/0!	0	Autumn	2012-05-11	2:30	Night
13797	001	3324	No	0	0	0	0	0	0	0	0	0	0	0	0	0	0	0	#DIV/0!	#DIV/0!	0	Autumn	2012-05-11	3:00	Night
13845	001	3372	No	0	0	0	0	0	0	0	0	0	0	0	0	0	0	0	#DIV/0!	#DIV/0!	0	Autumn	2012-05-12	3:00	Night
13851	001	3378	No	0	0	0	0	0	0	0	0	0	0	0	0	0	0	0	#DIV/0!	#DIV/0!	0	Autumn	2012-05-12	6:00	Night
13858	001	3385	No	0	0	0	0	0	0	0	0	0	0	0	0	0	0	0	#DIV/0!	#DIV/0!	0	Autumn	2012-05-12	9:30	Morning
13868	001	3395	No	0	0	0	0	0	0	0	0	0	0	0	0	0	0	0	#DIV/0!	#DIV/0!	0	Autumn	2012-05-12	14:30	Afternoon
13877	001	3404	No	0	0	0	0	0	0	0	0	0	0	0	0	0	0	0	#DIV/0!	#DIV/0!	0	Autumn	2012-05-12	19:00	Night
13883	001	3410	No	0	0	0	0	0	0	0	0	0	0	0	0	0	0	0	#DIV/0!	#DIV/0!	0	Autumn	2012-05-12	22:00	Night
13885	001	3412	No	0	0	0	0	0	0	0	0	0	0	0	0	0	0	0	#DIV/0!	#DIV/0!	0	Autumn	2012-05-12	23:00	Night
13887	001	3414	No	0	0	0	0	0	0	0	0	0	0	0	0	0	0	0	#DIV/0!	#DIV/0!	0	Autumn	2012-05-13	0:00	Night
13889	001	3416	No	0	0	0	0	0	0	0	0	0	0	0	0	0	0	0	#DIV/0!	#DIV/0!	0	Autumn	2012-05-13	1:00	Night
13898	001	3425	No	0	0	0	0	0	0	0	0	0	0	0	0	0	0	0	#DIV/0!	#DIV/0!	0	Autumn	2012-05-13	5:30	Night
13917	001	3444	No	0	0	0	0	0	0	0	0	0	0	0	0	0	0	0	#DIV/0!	#DIV/0!	0	Autumn	2012-05-13	15:00	Afternoon
13925	001	3452	No	0	0	0	0	0	0	0	0	0	0	0	0	0	0	0	#DIV/0!	#DIV/0!	0	Autumn	2012-05-13	19:00	Night
13927	001	3454	No	0	0	0	0	0	0	0	0	0	0	0	0	0	0	0	#DIV/0!	#DIV/0!	0	Autumn	2012-05-13	20:00	Night
13932	001	3459	No	0	0	0	0	0	0	0	0	0	0	0	0	0	0	0	#DIV/0!	#DIV/0!	0	Autumn	2012-05-13	22:30	Night
13938	001	3465	No	0	0	0	0	0	0	0	0	0	0	0	0	0	0	0	#DIV/0!	#DIV/0!	0	Autumn	2012-05-14	1:30	Night
13946	001	3473	No	0	0	0	0	0	0	0	0	0	0	0	0	0	0	0	#DIV/0!	#DIV/0!	0	Autumn	2012-05-14	5:30	Night
13961	001	3488	No	0	0	0	0	0	0	0	0	0	0	0	0	0	0	0	#DIV/0!	#DIV/0!	0	Autumn	2012-05-14	13:00	Afternoon
13981	001	3508	No	0	0	0	0	0	0	0	0	0	0	0	0	0	0	0	#DIV/0!	#DIV/0!	0	Autumn	2012-05-14	23:00	Night
13988	001	3515	No	0	0	0	0	0	0	0	0	0	0	0	0	0	0	0	#DIV/0!	#DIV/0!	0	Autumn	2012-05-15	2:30	Night
13989	001	3516	No	0	0	0	0	0	0	0	0	0	0	0	0	0	0	0	#DIV/0!	#DIV/0!	0	Autumn	2012-05-15	3:00	Night
14001	001	3528	No	0	0	0	0	0	0	0	0	0	0	0	0	0	0	0	#DIV/0!	#DIV/0!	0	Autumn	2012-05-15	9:00	Morning
14018	001	3545	No	0	0	0	0	0	0	0	0	0	0	0	0	0	0	0	#DIV/0!	#DIV/0!	0	Autumn	2012-05-15	17:30	Dusk
14031	001	3558	No	0	0	0	0	0	0	0	0	0	0	0	0	0	0	0	#DIV/0!	#DIV/0!	0	Autumn	2012-05-16	0:00	Night
14042	001	3569	No	0	0	0	0	0	0	0	0	0	0	0	0	0	0	0	#DIV/0!	#DIV/0!	0	Autumn	2012-05-16	5:30	Night
14043	001	3570	No	0	0	0	0	0	0	0	0	0	0	0	0	0	0	0	#DIV/0!	#DIV/0!	0	Autumn	2012-05-16	6:00	Night
14126	001	3653	No	0	0	0	0	0	0	0	0	0	0	0	0	0	0	0	#DIV/0!	#DIV/0!	0	Autumn	2012-05-17	23:30	Night
14156	001	3683	No	0	0	0	0	0	0	0	0	0	0	0	0	0	0	0	#DIV/0!	#DIV/0!	0	Autumn	2012-05-18	14:30	Afternoon
14189	001	3716	No	0	0	0	0	0	0	0	0	0	0	0	0	0	0	0	#DIV/0!	#DIV/0!	0	Autumn	2012-05-19	7:00	Night
14263	001	3790	No	0	0	0	0	0	0	0	0	0	0	0	0	0	0	0	#DIV/0!	#DIV/0!	0	Autumn	2012-05-20	20:00	Night
14278	001	3805	No	0	0	0	0	0	0	0	0	0	0	0	0	0	0	0	#DIV/0!	#DIV/0!	0	Autumn	2012-05-21	3:30	Night
14282	001	3809	No	0	0	0	0	0	0	0	0	0	0	0	0	0	0	0	#DIV/0!	#DIV/0!	0	Autumn	2012-05-21	5:30	Night
14362	001	3889	No	0	0	0	0	0	0	0	0	0	0	0	0	0	0	0	#DIV/0!	#DIV/0!	0	Autumn	2012-05-22	21:30	Night
281	2011	0576	Yes	1	0	0	0	1	0	0	0	0	0	0	0	0	0	0	#DIV/0!	#DIV/0!	0	Winter	2011-07-28	09:00	Morning
406	2011	0826	Yes	1	0	0	0	0	0	1	0	0	0	0	0	0	0	0	#DIV/0!	#DIV/0!	0	Winter	2011-07-30	23:30	Night
462	2011	0938	Yes	1	0	0	0	0	0	1	0	0	0	0	0	0	0	0	#DIV/0!	#DIV/0!	0	Winter	2011-08-01	03:30	Night
591	000	0117	Yes	1	0	0	0	1	0	0	0	0	0	0	0	0	0	0	#DIV/0!	#DIV/0!	0	Winter	2011-08-08	23:00	Night
646	000	0172	Yes	1	0	0	0	0	0	1	0	0	0	0	0	0	0	0	#DIV/0!	#DIV/0!	0	Winter	2011-08-10	2:30	Night
838	000	0364	Yes	1	0	0	0	1	0	0	0	0	0	0	0	0	0	0	#DIV/0!	#DIV/0!	0	Winter	2011-08-14	2:30	Night
1181	000	0707	Yes	1	0	0	0	0	0	1	0	0	0	0	0	0	0	0	#DIV/0!	#DIV/0!	0	Winter	2011-08-21	6:00	Night
1314	000	0840	Yes	1	0	0	0	0	0	1	0	0	0	0	0	0	0	0	#DIV/0!	#DIV/0!	0	Winter	2011-08-24	0:30	Night
2642	000	2168	Yes	1	0	0	0	0	0	1	0	0	0	0	0	0	0	0	#DIV/0!	#DIV/0!	0	Spring	2011-09-20	16:30	Afternoon
2812	000	2338	Yes	1	0	0	0	1	0	0	0	0	0	0	0	0	0	0	#DIV/0!	#DIV/0!	0	Spring	2011-09-24	5:30	Dawn
3389	000	2915	Yes	1	0	0	0	1	0	0	0	0	0	0	0	0	0	0	#DIV/0!	#DIV/0!	0	Spring	2011-10-06	7:00	Morning
4337	000	3863	Yes	1	0	1	0	0	0	0	0	0	0	0	0	0	0	0	#DIV/0!	#DIV/0!	0	Spring	2011-10-26	1:00	Night
4452	000	3978	Yes	1	0	0	0	0	0	1	0	0	0	0	0	0	0	0	#DIV/0!	#DIV/0!	0	Spring	2011-10-28	10:30	Morning
4713	000	4239	Yes	1	0	0	0	1	0	0	0	0	0	0	0	0	0	0	#DIV/0!	#DIV/0!	0	Spring	2011-11-02	21:00	Dusk
5186	000	4712	Yes	1	0	0	0	0	0	1	0	0	0	0	0	0	0	0	#DIV/0!	#DIV/0!	0	Spring	2011-11-12	17:30	Afternoon
13740	001	3267	Yes	1	0	0	0	1	0	0	0	0	0	0	0	0	0	0	#DIV/0!	#DIV/0!	0	Autumn	2012-05-09	22:30	Night
13741	001	3268	Yes	1	0	0	0	0	0	1	0	0	0	0	0	0	0	0	#DIV/0!	#DIV/0!	0	Autumn	2012-05-09	23:00	Night
14063	001	3590	Yes	1	0	0	1	0	0	0	0	0	0	0	0	0	0	0	#DIV/0!	#DIV/0!	0	Autumn	2012-05-16	16:00	Afternoon
14208	001	3735	Yes	1	0	0	0	1	0	0	0	0	0	0	0	0	0	0	#DIV/0!	#DIV/0!	0	Autumn	2012-05-19	16:30	Afternoon
4258	000	3784	Yes	1	1	0	0	0	0	0	0	0	0	0	0	0	0	1	#DIV/0!	0	1	Spring	2011-10-24	9:30	Morning
5246	000	4772	Yes	1	1	0	0	0	0	0	0	0	0	0	0	0	0	1	#DIV/0!	0	1	Spring	2011-11-13	23:30	Night
5395	000	4921	Yes	1	1	0	0	0	0	0	0	0	0	0	1	1	0	0	100	100	0	Spring	2011-11-17	2:00	Night
13513	001	3040	Yes	1	1	0	0	0	0	0	0	0	0	0	0	0	0	1	#DIV/0!	0	1	Autumn	2012-05-05	5:00	Night
13888	001	3415	Yes	1	1	0	0	0	0	0	0	0	0	0	0	0	0	1	#DIV/0!	0	1	Autumn	2012-05-13	0:30	Night
13977	001	3504	Yes	1	1	0	0	0	0	0	0	0	0	0	0	0	0	1	#DIV/0!	0	1	Autumn	2012-05-14	21:00	Night
14101	001	3628	Yes	1	1	0	0	0	0	0	0	0	0	0	0	0	0	1	#DIV/0!	0	1	Autumn	2012-05-17	11:00	Morning
1656	000	1182	Yes	2	0	0	0	0	0	2	0	0	0	0	0	0	0	0	#DIV/0!	#DIV/0!	0	Winter	2011-08-31	3:30	Night
4918	000	4444	Yes	2	0	0	0	0	0	2	0	0	0	0	0	0	0	0	#DIV/0!	#DIV/0!	0	Spring	2011-11-07	3:30	Night
14064	001	3591	Yes	2	0	0	2	0	0	0	0	0	0	0	0	0	0	0	#DIV/0!	#DIV/0!	0	Autumn	2012-05-16	16:30	Afternoon
97	2011	0208	Yes	2	1	0	0	0	0	0	0	0	0	1	1	1	0	0	100	100	0	Winter	2011-07-24	13:00	Afternoon
642	000	0168	Yes	2	1	0	0	1	0	0	0	0	0	0	1	1	0	0	100	100	0	Winter	2011-08-10	0:30	Night
2644	000	2170	Yes	2	1	0	0	0	0	1	0	0	0	0	0	0	0	1	#DIV/0!	0	1	Spring	2011-09-20	17:30	Afternoon
4198	000	3724	Yes	2	1	0	0	1	0	0	0	0	0	0	1	1	0	0	100	100	0	Spring	2011-10-23	3:30	Night
441	2011	0896	Yes	2	2	0	0	0	0	0	0	0	0	0	2	2	0	0	100	100	0	Winter	2011-07-31	17:00	Afternoon
695	000	0221	Yes	2	2	0	0	0	0	0	0	0	0	0	0	0	0	2	#DIV/0!	0	2	Winter	2011-08-11	3:00	Night
1332	000	0858	Yes	2	2	0	0	0	0	0	0	0	0	0	2	2	0	0	100	100	0	Winter	2011-08-24	9:30	Morning
1807	000	1333	Yes	2	2	0	0	0	0	0	0	0	0	0	2	2	0	0	100	100	0	Spring	2011-09-03	7:00	Dawn
2032	000	1558	Yes	2	2	0	0	0	0	0	0	0	0	0	2	2	0	0	100	100	0	Spring	2011-09-07	23:30	Night
2523	000	2049	Yes	2	2	0	0	0	0	0	0	0	0	0	2	2	0	0	100	100	0	Spring	2011-09-18	5:00	Night
2719	000	2245	Yes	2	2	0	0	0	0	0	0	0	0	0	0	0	0	2	#DIV/0!	0	2	Spring	2011-09-22	7:00	Morning
4209	000	3735	Yes	2	2	0	0	0	0	0	0	0	0	0	1	1	0	1	100	50	1	Spring	2011-10-23	9:00	Morning
4355	000	3881	Yes	2	2	0	0	0	0	0	0	0	0	0	2	2	0	0	100	100	0	Spring	2011-10-26	10:00	Morning
14045	001	3572	Yes	2	2	0	0	0	0	0	0	0	0	0	2	2	0	0	100	100	0	Autumn	2012-05-16	7:00	Night
14055	001	3582	Yes	2	2	0	0	0	0	0	0	0	0	0	2	2	0	0	100	100	0	Autumn	2012-05-16	12:00	Morning
2724	000	2250	Yes	3	0	0	0	3	0	0	0	0	0	0	0	0	0	0	#DIV/0!	#DIV/0!	0	Spring	2011-09-22	9:30	Morning
3285	000	2811	Yes	3	0	0	0	0	0	0	0	1	2	0	0	0	0	0	#DIV/0!	#DIV/0!	0	Spring	2011-10-04	3:00	Night
3513	000	3039	Yes	3	0	0	0	3	0	0	0	0	0	0	0	0	0	0	#DIV/0!	#DIV/0!	0	Spring	2011-10-08	21:00	Night
14117	001	3644	Yes	3	0	0	3	0	0	0	0	0	0	0	0	0	0	0	#DIV/0!	#DIV/0!	0	Autumn	2012-05-17	19:00	Night
349	2011	0712	Yes	3	1	1	0	0	0	0	0	0	0	1	1	1	0	0	100	100	0	Winter	2011-07-29	19:00	Night
592	000	0118	Yes	3	1	1	0	0	0	0	1	0	0	0	1	1	0	0	100	100	0	Winter	2011-08-08	23:30	Night
14199	001	3726	Yes	3	1	2	0	0	0	0	0	0	0	0	1	1	0	0	100	100	0	Autumn	2012-05-19	12:00	Morning
3122	000	2648	Yes	3	2	0	0	1	0	0	0	0	0	0	2	2	0	0	100	100	0	Spring	2011-09-30	17:30	Afternoon
4479	000	4005	Yes	3	2	0	0	0	0	1	0	0	0	0	0	0	0	2	#DIV/0!	0	2	Spring	2011-10-29	0:00	Night
14367	001	3894	Yes	3	2	0	0	0	0	0	0	1	0	0	2	2	0	0	100	100	0	Autumn	2012-05-23	0:00	Night
5126	000	4652	Yes	3	3	0	0	0	0	0	0	0	0	0	2	2	0	1	100	66.6667	1	Spring	2011-11-11	11:30	Morning
13503	001	3030	Yes	3	3	0	0	0	0	0	0	0	0	0	1	1	0	2	100	33.3333	2	Autumn	2012-05-05	0:00	Night
14241	001	3768	Yes	3	3	0	0	0	0	0	0	0	0	0	3	3	0	0	100	100	0	Autumn	2012-05-20	9:00	Morning
2097	000	1623	Yes	4	0	0	0	0	0	4	0	0	0	0	0	0	0	0	#DIV/0!	#DIV/0!	0	Spring	2011-09-09	8:00	Morning
3572	000	3098	Yes	4	0	0	0	4	0	0	0	0	0	0	0	0	0	0	#DIV/0!	#DIV/0!	0	Spring	2011-10-10	2:30	Night
4161	000	3687	Yes	4	0	0	0	0	0	4	0	0	0	0	0	0	0	0	#DIV/0!	#DIV/0!	0	Spring	2011-10-22	9:00	Morning
4611	000	4137	Yes	4	0	0	0	0	0	4	0	0	0	0	0	0	0	0	#DIV/0!	#DIV/0!	0	Spring	2011-10-31	18:00	Afternoon
675	000	0201	Yes	4	1	0	0	3	0	0	0	0	0	0	1	1	0	0	100	100	0	Winter	2011-08-10	17:00	Afternoon
1560	000	1086	Yes	4	1	0	0	0	0	2	0	0	0	1	1	1	0	0	100	100	0	Winter	2011-08-29	3:30	Night
14284	001	3811	Yes	4	1	0	0	3	0	0	0	0	0	0	1	1	0	0	100	100	0	Autumn	2012-05-21	6:30	Night
13510	001	3037	Yes	4	2	1	0	1	0	0	0	0	0	0	0	0	0	2	#DIV/0!	0	2	Autumn	2012-05-05	3:30	Night
2137	000	1663	Yes	4	3	0	0	0	0	0	0	0	1	0	1	1	0	2	100	33.3333	2	Spring	2011-09-10	4:00	Night
2909	000	2435	Yes	4	3	0	0	0	0	1	0	0	0	0	3	3	0	0	100	100	0	Spring	2011-09-26	7:00	Morning
3831	000	3357	Yes	4	3	0	0	1	0	0	0	0	0	0	3	3	0	0	100	100	0	Spring	2011-10-15	12:00	Morning
13779	001	3306	Yes	4	3	0	0	1	0	0	0	0	0	0	3	3	0	0	100	100	0	Autumn	2012-05-10	18:00	Dusk
2430	000	1956	Yes	4	4	0	0	0	0	0	0	0	0	0	5	4	0	0	100	100	1	Spring	2011-09-16	6:30	Dawn
4334	000	3860	Yes	4	4	0	0	0	0	0	0	0	0	0	4	4	0	0	100	100	0	Spring	2011-10-25	23:30	Night
4348	000	3874	Yes	4	4	0	0	0	0	0	0	0	0	0	4	4	0	0	100	100	0	Spring	2011-10-26	6:30	Morning
5516	000	5042	Yes	4	4	0	0	0	0	0	0	0	0	0	4	4	0	0	100	100	0	Spring	2011-11-19	14:30	Afternoon
14279	001	3806	Yes	4	4	0	0	0	0	0	0	0	0	0	3	3	0	1	100	75	1	Autumn	2012-05-21	4:00	Night
388	2011	0790	Yes	5	0	0	0	0	0	5	0	0	0	0	0	0	0	0	#DIV/0!	#DIV/0!	0	Winter	2011-07-30	14:30	Afternoon
2026	000	1552	Yes	5	0	0	1	0	0	3	1	0	0	0	0	0	0	0	#DIV/0!	#DIV/0!	0	Spring	2011-09-07	20:30	Night
3476	000	3002	Yes	5	0	0	3	2	0	0	0	0	0	0	0	0	0	0	#DIV/0!	#DIV/0!	0	Spring	2011-10-08	2:30	Night
976	000	0502	Yes	5	1	0	2	0	0	0	0	0	0	2	1	1	0	0	100	100	0	Winter	2011-08-16	23:30	Night
1238	000	0764	Yes	5	2	0	0	3	0	0	0	0	0	0	2	2	0	0	100	100	0	Winter	2011-08-22	10:30	Morning
1536	000	1062	Yes	5	2	0	0	3	0	0	0	0	0	0	2	2	0	0	100	100	0	Winter	2011-08-28	15:30	Afternoon
4285	000	3811	Yes	5	2	0	0	2	0	1	0	0	0	0	1	1	0	1	100	50	1	Spring	2011-10-24	23:00	Night
903	000	0429	Yes	5	3	0	0	0	0	2	0	0	0	0	3	3	0	0	100	100	0	Winter	2011-08-15	11:00	Morning
4948	000	4474	Yes	5	3	0	0	2	0	0	0	0	0	0	2	2	0	1	100	66.6667	1	Spring	2011-11-07	18:30	Afternoon
3299	000	2825	Yes	5	4	0	0	0	0	0	0	1	0	0	3	3	0	1	100	75	1	Spring	2011-10-04	10:00	Morning
137	2011	0288	Yes	5	5	0	0	0	0	0	0	0	0	0	0	0	0	5	#DIV/0!	0	5	Winter	2011-07-25	09:00	Morning
2427	000	1953	Yes	5	5	0	0	0	0	0	0	0	0	0	2	2	0	3	100	40	3	Spring	2011-09-16	5:00	Night
2845	000	2371	Yes	5	5	0	0	4	0	0	0	1	0	0	1	1	0	4	100	20	4	Spring	2011-09-24	22:00	Night
4074	000	3600	Yes	5	5	0	0	0	0	0	0	0	0	0	0	5	0	0	100	100	5	Spring	2011-10-20	13:30	Afternoon
40	2011	0094	Yes	6	1	0	0	1	0	1	0	1	2	0	1	1	0	0	100	100	0	Winter	2011-07-23	08:30	Dawn
1134	000	0660	Yes	6	1	0	0	4	0	0	0	1	0	0	1	1	0	0	100	100	0	Winter	2011-08-20	6:30	Night
14169	001	3696	Yes	6	2	0	0	4	0	0	0	0	0	0	3	2	0	1	100	66.6667	1	Autumn	2012-05-18	21:00	Night
226	2011	0466	Yes	6	3	0	0	0	0	2	0	0	0	1	2	2	0	1	100	66.6667	1	Winter	2011-07-27	05:30	Night
643	000	0169	Yes	6	3	0	0	2	0	1	0	0	0	0	3	3	0	0	100	100	0	Winter	2011-08-10	1:00	Night
2375	000	1901	Yes	6	3	0	0	3	0	0	0	0	0	0	5	3	0	2	100	60	2	Spring	2011-09-15	3:00	Night
638	000	0164	Yes	6	4	1	0	1	0	0	0	0	0	0	2	2	0	2	100	50	2	Winter	2011-08-09	22:30	Night
3283	000	2809	Yes	6	4	0	0	0	0	0	0	2	0	0	4	4	0	0	100	100	0	Spring	2011-10-04	2:00	Night
14303	001	3830	Yes	6	5	0	0	1	0	0	0	0	0	0	5	5	0	0	100	100	0	Autumn	2012-05-21	16:00	Afternoon
1690	000	1216	Yes	6	6	0	0	0	0	0	0	0	0	0	5	5	0	1	100	83.3333	1	Winter	2011-08-31	20:30	Night
362	2011	0738	Yes	7	1	0	0	0	0	2	0	0	0	3	0	0	0	1	#DIV/0!	0	1	Winter	2011-07-30	01:30	Night
1605	000	1131	Yes	7	3	0	0	2	0	2	0	0	0	0	3	3	0	0	100	100	0	Winter	2011-08-30	2:00	Night
2060	000	1586	Yes	7	3	2	0	0	0	0	0	0	0	2	2	2	0	1	100	66.6667	1	Spring	2011-09-08	13:30	Afternoon
9	2011	0032	Yes	7	4	1	0	1	0	0	0	1	0	0	4	2	0	2	100	50	0	Winter	2011-07-22	17:00	Afternoon
2887	000	2413	Yes	7	7	0	0	0	0	0	0	0	0	0	6	6	0	1	100	85.7143	1	Spring	2011-09-25	20:00	Dusk
4955	000	4481	Yes	7	7	0	0	0	0	0	0	0	0	0	6	6	0	1	100	85.7143	1	Spring	2011-11-07	22:00	Night
14017	001	3544	Yes	7	7	0	0	0	0	0	0	0	0	0	5	5	0	2	100	71.4286	2	Autumn	2012-05-15	17:00	Afternoon
3554	000	3080	Yes	8	0	0	0	0	0	8	0	0	0	0	0	0	0	0	#DIV/0!	#DIV/0!	0	Spring	2011-10-09	17:30	Afternoon
13904	001	3431	Yes	8	0	0	0	8	0	0	0	0	0	0	0	0	0	0	#DIV/0!	#DIV/0!	0	Autumn	2012-05-13	8:30	Morning
1684	000	1210	Yes	8	1	0	0	0	0	4	0	0	0	3	0	0	0	1	#DIV/0!	0	1	Winter	2011-08-31	17:30	Afternoon
330	2011	0674	Yes	8	2	0	0	6	0	0	0	0	0	0	2	2	0	0	100	100	0	Winter	2011-07-29	09:30	Morning
2339	000	1865	Yes	9	1	0	1	0	0	6	0	0	0	1	1	1	0	0	100	100	0	Spring	2011-09-14	9:00	Morning
953	000	0479	Yes	9	2	0	0	0	0	0	1	3	0	3	0	0	0	2	#DIV/0!	0	2	Winter	2011-08-16	12:00	Morning
348	2011	0710	Yes	9	7	1	0	0	0	1	0	0	0	0	7	7	0	0	100	100	0	Winter	2011-07-29	18:30	Dusk
2607	000	2133	Yes	11	0	0	4	0	0	7	0	0	0	0	0	0	0	0	#DIV/0!	#DIV/0!	0	Spring	2011-09-19	23:00	Night
2833	000	2359	Yes	11	0	0	0	0	0	8	0	0	0	3	0	0	0	0	#DIV/0!	#DIV/0!	0	Spring	2011-09-24	16:00	Afternoon
3832	000	3358	Yes	11	4	7	0	0	0	0	0	0	0	0	1	1	0	3	100	25	3	Spring	2011-10-15	12:30	Morning
14335	001	3862	Yes	11	7	2	0	2	0	0	0	0	0	0	7	7	0	0	100	100	0	Autumn	2012-05-22	8:00	Dawn
14345	001	3872	Yes	12	2	4	1	1	0	0	0	4	0	0	1	1	0	1	100	50	1	Autumn	2012-05-22	13:00	Afternoon
1465	000	0991	Yes	13	6	0	0	2	0	7	0	0	0	0	1	1	0	0	100	100	5	Winter	2011-08-27	4:00	Night
14318	001	3845	Yes	14	4	0	2	8	0	0	0	0	0	0	3	3	0	1	100	75	1	Autumn	2012-05-21	23:30	Night
2071	000	1597	Yes	16	1	1	0	6	0	7	0	1	0	0	1	1	0	0	100	100	0	Spring	2011-09-08	19:00	Dusk
17	2011	0048	Yes	16	4	0	12	0	0	0	0	0	0	0	2	2	0	2	100	50	2	Winter	2011-07-22	21:00	Night
2227	000	1753	Yes	16	8	0	2	1	0	0	4	0	0	1	8	8	0	0	100	100	0	Spring	2011-09-12	1:00	Night
2460	000	1986	Yes	16	10	0	2	0	0	4	0	0	0	0	6	6	0	4	100	60	4	Spring	2011-09-16	21:30	Night
1950	000	1476	No	17	17	0	0	0	0	0	0	0	0	0	11	11	0	6	100	64.7059	6	Spring	2011-09-06	6:30	Dawn
942	000	0468	Yes	18	0	2	1	3	0	0	0	0	0	12	0	0	0	0	#DIV/0!	#DIV/0!	0	Winter	2011-08-16	6:30	Night
2631	000	2157	Yes	19	15	0	0	2	0	2	0	0	0	0	12	12	0	3	100	80	3	Spring	2011-09-20	11:00	Morning
13971	001	3498	Yes	21	0	1	3	7	0	1	9	0	0	0	0	0	0	0	#DIV/0!	#DIV/0!	0	Autumn	2012-05-14	18:00	Dusk
67	2011	0148	Yes	21	3	0	0	3	0	1	7	2	0	5	3	3	0	0	100	100	0	Winter	2011-07-23	22:00	Night
14347	001	3874	Yes	22	4	1	0	7	0	2	0	2	0	0	4	4	0	0	100	100	0	Autumn	2012-05-22	14:00	Afternoon
697	000	0223	Yes	22	8	0	7	1	0	3	0	0	0	3	6	6	0	2	100	75	2	Winter	2011-08-11	4:00	Night
14325	001	3852	Yes	23	2	2	0	11	0	3	0	5	0	0	2	2	0	0	100	100	0	Autumn	2012-05-22	3:00	Night
1081	000	0607	Yes	26	3	1	0	6	0	12	3	1	0	0	1	1	0	2	100	33.3333	2	Winter	2011-08-19	4:00	Night
2348	000	1874	Yes	26	7	0	0	3	0	11	1	2	0	2	4	4	0	3	100	57.1429	3	Spring	2011-09-14	13:30	Afternoon
14211	001	3738	Yes	27	4	1	1	15	0	5	0	1	0	0	4	4	0	0	100	100	0	Autumn	2012-05-19	18:00	Dusk
1219	000	0745	Yes	27	7	0	3	4	0	5	3	3	0	2	6	6	0	1	100	85.7143	1	Winter	2011-08-22	1:00	Night
20	2011	0054	Yes	31	8	3	21	0	0	0	0	0	0	0	2	2	0	6	100	25	6	Winter	2011-07-22	22:30	Night
1082	000	0608	Yes	32	6	0	3	4	0	13	0	5	0	1	2	2	0	4	100	33.3333	4	Winter	2011-08-19	4:30	Night
2360	000	1886	Yes	40	2	0	2	6	0	27	0	0	0	3	2	2	0	0	100	100	0	Spring	2011-09-14	19:30	Dusk
228	2011	0470	No	0	0	0	0	0	0	0	0	0	0	0	1	0	1	0	0	#DIV/0!	1	Winter	2011-07-27	06:30	Night
437	2011	0888	No	0	0	0	0	0	0	0	0	0	0	0	1	0	1	0	0	#DIV/0!	1	Winter	2011-07-31	15:00	Afternoon
1237	000	0763	No	0	0	0	0	0	0	0	0	0	0	0	1	0	1	0	0	#DIV/0!	1	Winter	2011-08-22	10:00	Morning
1717	000	1243	No	0	0	0	0	0	0	0	0	0	0	0	1	0	1	0	0	#DIV/0!	1	Spring	2011-09-01	10:00	Morning
1799	000	1325	No	0	0	0	0	0	0	0	0	0	0	0	1	0	1	0	0	#DIV/0!	1	Spring	2011-09-03	3:00	Night
1823	000	1349	No	0	0	0	0	0	0	0	0	0	0	0	1	0	1	0	0	#DIV/0!	1	Spring	2011-09-03	15:00	Afternoon
1862	000	1388	No	0	0	0	0	0	0	0	0	0	0	0	1	0	1	0	0	#DIV/0!	1	Spring	2011-09-04	10:30	Morning
1899	000	1425	No	0	0	0	0	0	0	0	0	0	0	0	1	0	1	0	0	#DIV/0!	1	Spring	2011-09-05	5:00	Night
2014	000	1540	No	0	0	0	0	0	0	0	0	0	0	0	1	0	1	0	0	#DIV/0!	1	Spring	2011-09-07	14:30	Afternoon
2490	000	2016	No	0	0	0	0	0	0	0	0	0	0	0	1	0	1	0	0	#DIV/0!	1	Spring	2011-09-17	12:30	Morning
2875	000	2401	No	0	0	0	0	0	0	0	0	0	0	0	1	0	1	0	0	#DIV/0!	1	Spring	2011-09-25	14:00	Afternoon
2897	000	2423	No	0	0	0	0	0	0	0	0	0	0	0	1	0	1	0	0	#DIV/0!	1	Spring	2011-09-26	1:00	Night
2935	000	2461	No	0	0	0	0	0	0	0	0	0	0	0	1	0	1	0	0	#DIV/0!	1	Spring	2011-09-26	20:00	Dusk
2939	000	2465	No	0	0	0	0	0	0	0	0	0	0	0	1	0	1	0	0	#DIV/0!	1	Spring	2011-09-26	22:00	Night
3007	000	2533	No	0	0	0	0	0	0	0	0	0	0	0	1	0	1	0	0	#DIV/0!	1	Spring	2011-09-28	8:00	Morning
3140	000	2666	No	0	0	0	0	0	0	0	0	0	0	0	1	0	1	0	0	#DIV/0!	1	Spring	2011-10-01	2:30	Night
3225	000	2751	No	0	0	0	0	0	0	0	0	0	0	0	1	0	1	0	0	#DIV/0!	1	Spring	2011-10-02	21:00	Night
3255	000	2781	No	0	0	0	0	0	0	0	0	0	0	0	1	0	1	0	0	#DIV/0!	1	Spring	2011-10-03	12:00	Morning
3613	000	3139	No	0	0	0	0	0	0	0	0	0	0	0	1	0	1	0	0	#DIV/0!	1	Spring	2011-10-10	23:00	Night
3614	000	3140	No	0	0	0	0	0	0	0	0	0	0	0	1	0	1	0	0	#DIV/0!	1	Spring	2011-10-10	23:30	Night
3684	000	3210	No	0	0	0	0	0	0	0	0	0	0	0	1	0	1	0	0	#DIV/0!	1	Spring	2011-10-12	10:30	Morning
3756	000	3282	No	0	0	0	0	0	0	0	0	0	0	0	1	0	1	0	0	#DIV/0!	1	Spring	2011-10-13	22:30	Night
3880	000	3406	No	0	0	0	0	0	0	0	0	0	0	0	1	0	1	0	0	#DIV/0!	1	Spring	2011-10-16	12:30	Morning
4018	000	3544	No	0	0	0	0	0	0	0	0	0	0	0	1	0	1	0	0	#DIV/0!	1	Spring	2011-10-19	9:30	Morning
4046	000	3572	No	0	0	0	0	0	0	0	0	0	0	0	1	0	1	0	0	#DIV/0!	1	Spring	2011-10-19	23:30	Night
4093	000	3619	No	0	0	0	0	0	0	0	0	0	0	0	1	0	1	0	0	#DIV/0!	1	Spring	2011-10-20	23:00	Night
4106	000	3632	No	0	0	0	0	0	0	0	0	0	0	0	1	0	1	0	0	#DIV/0!	1	Spring	2011-10-21	5:30	Dawn
4121	000	3647	No	0	0	0	0	0	0	0	0	0	0	0	1	0	1	0	0	#DIV/0!	1	Spring	2011-10-21	13:00	Morning
4254	000	3780	No	0	0	0	0	0	0	0	0	0	0	0	1	0	1	0	0	#DIV/0!	1	Spring	2011-10-24	7:30	Morning
4260	000	3786	No	0	0	0	0	0	0	0	0	0	0	0	1	0	1	0	0	#DIV/0!	1	Spring	2011-10-24	10:30	Morning
4362	000	3888	No	0	0	0	0	0	0	0	0	0	0	0	1	0	1	0	0	#DIV/0!	1	Spring	2011-10-26	13:30	Afternoon
4394	000	3920	No	0	0	0	0	0	0	0	0	0	0	0	1	0	1	0	0	#DIV/0!	1	Spring	2011-10-27	5:30	Morning
4498	000	4024	No	0	0	0	0	0	0	0	0	0	0	0	1	0	1	0	0	#DIV/0!	1	Spring	2011-10-29	9:30	Morning
4706	000	4232	No	0	0	0	0	0	0	0	0	0	0	0	1	0	1	0	0	#DIV/0!	1	Spring	2011-11-02	17:30	Afternoon
4921	000	4447	No	0	0	0	0	0	0	0	0	0	0	0	1	0	1	0	0	#DIV/0!	1	Spring	2011-11-07	5:00	Dawn
4952	000	4478	No	0	0	0	0	0	0	0	0	0	0	0	1	0	1	0	0	#DIV/0!	1	Spring	2011-11-07	20:30	Dusk
4981	000	4507	No	0	0	0	0	0	0	0	0	0	0	0	1	0	1	0	0	#DIV/0!	1	Spring	2011-11-08	11:00	Morning
4993	000	4519	No	0	0	0	0	0	0	0	0	0	0	0	1	0	1	0	0	#DIV/0!	1	Spring	2011-11-08	17:00	Afternoon
5113	000	4639	No	0	0	0	0	0	0	0	0	0	0	0	1	0	1	0	0	#DIV/0!	1	Spring	2011-11-11	5:00	Dawn
5127	000	4653	No	0	0	0	0	0	0	0	0	0	0	0	1	0	1	0	0	#DIV/0!	1	Spring	2011-11-11	12:00	Morning
5431	000	4957	No	0	0	0	0	0	0	0	0	0	0	0	1	0	1	0	0	#DIV/0!	1	Spring	2011-11-17	20:00	Afternoon
5485	000	5011	No	0	0	0	0	0	0	0	0	0	0	0	1	0	1	0	0	#DIV/0!	1	Spring	2011-11-18	23:00	Night
5575	000	5101	No	0	0	0	0	0	0	0	0	0	0	0	1	0	1	0	0	#DIV/0!	1	Spring	2011-11-20	20:00	Afternoon
5581	000	5107	No	0	0	0	0	0	0	0	0	0	0	0	1	0	1	0	0	#DIV/0!	1	Spring	2011-11-20	23:00	Night
5582	000	5108	No	0	0	0	0	0	0	0	0	0	0	0	1	0	1	0	0	#DIV/0!	1	Spring	2011-11-20	23:30	Night
5653	000	5179	No	0	0	0	0	0	0	0	0	0	0	0	1	0	1	0	0	#DIV/0!	1	Spring	2011-11-22	11:00	Morning
5657	000	5183	No	0	0	0	0	0	0	0	0	0	0	0	1	0	1	0	0	#DIV/0!	1	Spring	2011-11-22	13:00	Afternoon
5794	000	5320	No	0	0	0	0	0	0	0	0	0	0	0	1	0	1	0	0	#DIV/0!	1	Spring	2011-11-25	9:30	Morning
6045	000	5571	No	0	0	0	0	0	0	0	0	0	0	0	1	0	1	0	0	#DIV/0!	1	Spring	2011-11-30	15:00	Afternoon
6081	000	5607	No	0	0	0	0	0	0	0	0	0	0	0	1	0	1	0	0	#DIV/0!	1	Summer	2011-12-01	9:00	Morning
6231	000	5757	No	0	0	0	0	0	0	0	0	0	0	0	1	0	1	0	0	#DIV/0!	1	Summer	2011-12-04	12:00	Morning
6238	000	5764	No	0	0	0	0	0	0	0	0	0	0	0	1	0	1	0	0	#DIV/0!	1	Summer	2011-12-04	15:30	Afternoon
6624	000	6150	No	0	0	0	0	0	0	0	0	0	0	0	1	0	1	0	0	#DIV/0!	1	Summer	2011-12-12	16:30	Afternoon
6808	000	6334	No	0	0	0	0	0	0	0	0	0	0	0	1	0	1	0	0	#DIV/0!	1	Summer	2011-12-16	12:30	Morning
7157	000	6683	No	0	0	0	0	0	0	0	0	0	0	0	1	0	1	0	0	#DIV/0!	1	Summer	2011-12-23	19:00	Afternoon
7362	000	6888	No	0	0	0	0	0	0	0	0	0	0	0	1	0	1	0	0	#DIV/0!	1	Summer	2011-12-28	1:30	Night
7383	000	6909	No	0	0	0	0	0	0	0	0	0	0	0	1	0	1	0	0	#DIV/0!	1	Summer	2011-12-28	12:00	Morning
7389	000	6915	No	0	0	0	0	0	0	0	0	0	0	0	1	0	1	0	0	#DIV/0!	1	Summer	2011-12-28	15:00	Afternoon
7408	000	6934	No	0	0	0	0	0	0	0	0	0	0	0	1	0	1	0	0	#DIV/0!	1	Summer	2011-12-29	0:30	Night
7447	000	6973	No	0	0	0	0	0	0	0	0	0	0	0	1	0	1	0	0	#DIV/0!	1	Summer	2011-12-29	20:00	Afternoon
7464	000	6990	No	0	0	0	0	0	0	0	0	0	0	0	1	0	1	0	0	#DIV/0!	1	Summer	2011-12-30	4:30	Dawn
7475	000	7001	No	0	0	0	0	0	0	0	0	0	0	0	1	0	1	0	0	#DIV/0!	1	Summer	2011-12-30	10:00	Morning
7542	000	7068	No	0	0	0	0	0	0	0	0	0	0	0	1	0	1	0	0	#DIV/0!	1	Summer	2011-12-31	19:30	Afternoon
7620	000	7146	No	0	0	0	0	0	0	0	0	0	0	0	1	0	1	0	0	#DIV/0!	1	Summer	2012-01-02	10:30	Morning
7738	000	7264	No	0	0	0	0	0	0	0	0	0	0	0	1	0	1	0	0	#DIV/0!	1	Summer	2012-01-04	21:30	Dusk
7752	000	7278	No	0	0	0	0	0	0	0	0	0	0	0	1	0	1	0	0	#DIV/0!	1	Summer	2012-01-05	4:30	Dawn
7772	000	7298	No	0	0	0	0	0	0	0	0	0	0	0	1	0	1	0	0	#DIV/0!	1	Summer	2012-01-05	14:30	Afternoon
7788	000	7314	No	0	0	0	0	0	0	0	0	0	0	0	1	0	1	0	0	#DIV/0!	1	Summer	2012-01-05	22:30	Dusk
7810	000	7336	No	0	0	0	0	0	0	0	0	0	0	0	1	0	1	0	0	#DIV/0!	1	Summer	2012-01-06	9:30	Morning
7857	000	7383	No	0	0	0	0	0	0	0	0	0	0	0	1	0	1	0	0	#DIV/0!	1	Summer	2012-01-07	9:00	Morning
7874	000	7400	No	0	0	0	0	0	0	0	0	0	0	0	1	0	1	0	0	#DIV/0!	1	Summer	2012-01-07	17:30	Afternoon
7887	000	7413	No	0	0	0	0	0	0	0	0	0	0	0	1	0	1	0	0	#DIV/0!	1	Summer	2012-01-08	0:00	Night
8196	000	7722	No	0	0	0	0	0	0	0	0	0	0	0	1	0	1	0	0	#DIV/0!	1	Summer	2012-01-14	10:30	Morning
8290	000	7816	No	0	0	0	0	0	0	0	0	0	0	0	1	0	1	0	0	#DIV/0!	1	Summer	2012-01-16	9:30	Morning
8293	000	7819	No	0	0	0	0	0	0	0	0	0	0	0	1	0	1	0	0	#DIV/0!	1	Summer	2012-01-16	11:00	Morning
8306	000	7832	No	0	0	0	0	0	0	0	0	0	0	0	1	0	1	0	0	#DIV/0!	1	Summer	2012-01-16	17:30	Afternoon
8353	000	7879	No	0	0	0	0	0	0	0	0	0	0	0	1	0	1	0	0	#DIV/0!	1	Summer	2012-01-17	17:00	Afternoon
8354	000	7880	No	0	0	0	0	0	0	0	0	0	0	0	1	0	1	0	0	#DIV/0!	1	Summer	2012-01-17	17:30	Afternoon
8362	000	7888	No	0	0	0	0	0	0	0	0	0	0	0	1	0	1	0	0	#DIV/0!	1	Summer	2012-01-17	21:30	Dusk
8370	000	7896	No	0	0	0	0	0	0	0	0	0	0	0	1	0	1	0	0	#DIV/0!	1	Summer	2012-01-18	1:30	Night
8464	000	7990	No	0	0	0	0	0	0	0	0	0	0	0	1	0	1	0	0	#DIV/0!	1	Summer	2012-01-20	0:30	Night
8497	000	8023	No	0	0	0	0	0	0	0	0	0	0	0	1	0	1	0	0	#DIV/0!	1	Summer	2012-01-20	17:00	Afternoon
8526	000	8052	No	0	0	0	0	0	0	0	0	0	0	0	1	0	1	0	0	#DIV/0!	1	Summer	2012-01-21	7:30	Morning
8637	000	8163	No	0	0	0	0	0	0	0	0	0	0	0	1	0	1	0	0	#DIV/0!	1	Summer	2012-01-23	15:00	Afternoon
8761	000	8287	No	0	0	0	0	0	0	0	0	0	0	0	1	0	1	0	0	#DIV/0!	1	Summer	2012-01-26	5:00	Dawn
8764	000	8290	No	0	0	0	0	0	0	0	0	0	0	0	1	0	1	0	0	#DIV/0!	1	Summer	2012-01-26	6:30	Morning
8773	000	8299	No	0	0	0	0	0	0	0	0	0	0	0	1	0	1	0	0	#DIV/0!	1	Summer	2012-01-26	11:00	Morning
8823	000	8349	No	0	0	0	0	0	0	0	0	0	0	0	1	0	1	0	0	#DIV/0!	1	Summer	2012-01-27	12:00	Morning
8835	000	8361	No	0	0	0	0	0	0	0	0	0	0	0	1	0	1	0	0	#DIV/0!	1	Summer	2012-01-27	18:00	Afternoon
8854	000	8380	No	0	0	0	0	0	0	0	0	0	0	0	1	0	1	0	0	#DIV/0!	1	Summer	2012-01-28	3:30	Night
8890	000	8416	No	0	0	0	0	0	0	0	0	0	0	0	1	0	1	0	0	#DIV/0!	1	Summer	2012-01-28	21:30	Dusk
8932	000	8458	No	0	0	0	0	0	0	0	0	0	0	0	1	0	1	0	0	#DIV/0!	1	Summer	2012-01-29	18:30	Afternoon
8978	000	8504	No	0	0	0	0	0	0	0	0	0	0	0	1	0	1	0	0	#DIV/0!	1	Summer	2012-01-30	17:30	Afternoon
9459	000	8985	No	0	0	0	0	0	0	0	0	0	0	0	1	0	1	0	0	#DIV/0!	1	Summer	2012-02-09	18:00	Afternoon
9649	000	9175	No	0	0	0	0	0	0	0	0	0	0	0	1	0	1	0	0	#DIV/0!	1	Summer	2012-02-13	17:00	Afternoon
9810	000	9336	No	0	0	0	0	0	0	0	0	0	0	0	1	0	1	0	0	#DIV/0!	1	Summer	2012-02-17	1:30	Night
10452	000	9978	No	0	0	0	0	0	0	0	0	0	0	0	1	0	1	0	0	#DIV/0!	1	Autumn	2012-03-02	10:30	Morning
11366	001	0893	No	0	0	0	0	0	0	0	0	0	0	0	1	0	1	0	0	#DIV/0!	1	Autumn	2012-03-21	11:30	Morning
11373	001	0900	No	0	0	0	0	0	0	0	0	0	0	0	1	0	1	0	0	#DIV/0!	1	Autumn	2012-03-21	15:00	Afternoon
13337	001	2864	No	0	0	0	0	0	0	0	0	0	0	0	1	0	1	0	0	#DIV/0!	1	Autumn	2012-05-01	13:00	Afternoon
13437	001	2964	No	0	0	0	0	0	0	0	0	0	0	0	1	0	1	0	0	#DIV/0!	1	Autumn	2012-05-03	15:00	Afternoon
14057	001	3584	No	0	0	0	0	0	0	0	0	0	0	0	1	0	1	0	0	#DIV/0!	1	Autumn	2012-05-16	13:00	Afternoon
14264	001	3791	No	0	0	0	0	0	0	0	0	0	0	0	1	0	1	0	0	#DIV/0!	1	Autumn	2012-05-20	20:30	Night
329	2011	0672	Yes	1	0	0	0	1	0	0	0	0	0	0	1	0	1	0	0	#DIV/0!	1	Winter	2011-07-29	09:00	Morning
528	000	0054	Yes	1	0	0	0	0	0	1	0	0	0	0	1	0	1	0	0	#DIV/0!	1	Winter	2011-08-07	15:30	Afternoon
1671	000	1197	Yes	1	0	0	0	1	0	0	0	0	0	0	1	0	1	0	0	#DIV/0!	1	Winter	2011-08-31	11:00	Morning
2289	000	1815	Yes	1	0	0	0	1	0	0	0	0	0	0	1	0	1	0	0	#DIV/0!	1	Spring	2011-09-13	8:00	Morning
2474	000	2000	Yes	1	0	0	0	0	0	0	0	0	0	1	1	0	1	0	0	#DIV/0!	1	Spring	2011-09-17	4:30	Night
2739	000	2265	Yes	1	0	0	0	1	0	0	0	0	0	0	1	0	1	0	0	#DIV/0!	1	Spring	2011-09-22	17:00	Afternoon
1394	000	0920	No	1	1	0	0	0	0	0	0	0	0	0	2	1	1	0	50	100	1	Winter	2011-08-25	16:30	Afternoon
1920	000	1446	Yes	1	1	0	0	0	0	0	0	0	0	0	2	1	1	0	50	100	1	Spring	2011-09-05	15:30	Afternoon
14025	001	3552	Yes	1	1	0	0	0	0	0	0	0	0	0	2	1	1	0	50	100	1	Autumn	2012-05-15	21:00	Night
2485	000	2011	Yes	2	0	0	0	0	0	0	2	0	0	0	1	0	1	0	0	#DIV/0!	1	Spring	2011-09-17	10:00	Morning
2572	000	2098	Yes	2	0	0	0	0	0	2	0	0	0	0	1	0	1	0	0	#DIV/0!	1	Spring	2011-09-19	5:30	Night
2761	000	2287	Yes	2	0	0	0	1	0	0	0	0	0	1	1	0	1	0	0	#DIV/0!	1	Spring	2011-09-23	4:00	Night
2505	000	2031	Yes	2	1	0	0	1	0	0	0	0	0	0	1	1	1	0	50	100	0	Spring	2011-09-17	20:00	Night
521	000	0047	No	2	2	0	0	0	0	0	0	0	0	0	3	2	1	0	66.6667	100	1	Winter	2011-08-07	12:00	Morning
2559	000	2085	Yes	2	2	0	0	0	0	0	0	0	0	0	3	2	1	0	66.6667	100	1	Spring	2011-09-18	23:00	Night
2600	000	2126	Yes	2	2	0	0	0	0	0	0	0	0	0	3	2	1	0	66.6667	100	1	Spring	2011-09-19	19:30	Dusk
4398	000	3924	Yes	2	2	0	0	0	0	0	0	0	0	0	3	2	1	0	66.6667	100	1	Spring	2011-10-27	7:30	Morning
3305	000	2831	Yes	3	0	3	0	0	0	0	0	0	0	0	1	0	1	0	0	#DIV/0!	1	Spring	2011-10-04	13:00	Afternoon
307	2011	0628	Yes	3	1	0	0	0	0	0	0	1	0	1	1	0	1	0	0	#DIV/0!	0	Winter	2011-07-28	22:00	Night
1364	000	0890	Yes	3	1	0	0	1	0	0	0	1	0	0	2	1	1	0	50	100	1	Winter	2011-08-25	1:30	Night
3267	000	2793	Yes	3	1	0	1	0	0	1	0	0	0	0	2	1	1	0	50	100	1	Spring	2011-10-03	18:00	Afternoon
1887	000	1413	Yes	3	3	0	0	0	0	0	0	0	0	0	4	3	1	0	75	100	1	Spring	2011-09-04	23:00	Night
2971	000	2497	Yes	3	3	0	0	0	0	0	0	0	0	0	4	3	1	0	75	100	1	Spring	2011-09-27	14:00	Afternoon
3533	000	3059	Yes	3	3	0	0	0	0	0	0	0	0	0	4	3	1	0	75	100	1	Spring	2011-10-09	7:00	Morning
262	2011	0538	Yes	4	2	0	0	2	0	0	0	0	0	0	2	1	1	1	50	50	0	Winter	2011-07-27	23:30	Night
2090	000	1616	Yes	4	3	0	0	1	0	0	0	0	0	0	3	2	1	1	66.6667	66.6667	0	Spring	2011-09-09	4:30	Night
14020	001	3547	Yes	4	4	0	0	0	0	0	0	0	0	0	3	2	1	2	66.6667	50	1	Autumn	2012-05-15	18:30	Dusk
14271	001	3798	Yes	4	4	0	0	0	0	0	0	0	0	0	6	4	1	0	80	100	2	Autumn	2012-05-21	0:00	Night
1780	000	1306	Yes	5	0	0	1	3	0	0	0	1	0	0	1	0	1	0	0	#DIV/0!	1	Spring	2011-09-02	17:30	Afternoon
3350	000	2876	Yes	5	0	0	0	5	0	0	0	0	0	0	1	0	1	0	0	#DIV/0!	1	Spring	2011-10-05	11:30	Morning
3845	000	3371	Yes	5	0	0	0	0	0	5	0	0	0	0	1	0	1	0	0	#DIV/0!	1	Spring	2011-10-15	19:00	Afternoon
3779	000	3305	Yes	5	1	0	0	4	0	0	0	0	0	0	2	1	1	0	50	100	1	Spring	2011-10-14	10:00	Morning
2408	000	1934	Yes	5	2	1	0	1	0	0	1	0	0	0	3	2	1	0	66.6667	100	1	Spring	2011-09-15	19:30	Dusk
995	000	0521	Yes	5	3	0	0	0	0	2	0	0	0	0	3	2	1	1	66.6667	66.6667	0	Winter	2011-08-17	9:00	Morning
2146	000	1672	Yes	5	3	0	0	2	0	0	0	0	0	0	2	1	1	2	50	33.3333	1	Spring	2011-09-10	8:30	Morning
14212	001	3739	Yes	6	3	0	0	3	0	0	0	0	0	0	4	3	1	0	75	100	1	Autumn	2012-05-19	18:30	Night
240	2011	0494	Yes	6	5	0	0	1	0	0	0	0	0	0	6	5	1	0	83.3333	100	1	Winter	2011-07-27	12:30	Morning
4540	000	4066	Yes	6	5	0	0	0	0	1	0	0	0	0	5	4	1	1	80	80	0	Spring	2011-10-30	6:30	Morning
14425	001	3952	Yes	7	3	0	0	4	0	0	0	0	0	0	4	3	1	0	75	100	1	Autumn	2012-05-24	5:00	Night
3738	000	3264	Yes	7	6	0	0	1	0	0	0	0	0	0	7	6	1	0	85.7143	100	1	Spring	2011-10-13	13:30	Afternoon
669	000	0195	Yes	7	7	0	0	0	0	0	0	0	0	0	7	6	1	1	85.7143	85.7143	0	Winter	2011-08-10	14:00	Afternoon
328	2011	0670	Yes	8	0	1	3	2	0	0	0	2	0	0	1	0	1	0	0	#DIV/0!	1	Winter	2011-07-29	08:30	Dawn
2563	000	2089	Yes	8	2	0	0	3	0	3	0	0	0	0	3	2	1	0	66.6667	100	1	Spring	2011-09-19	1:00	Night
2187	000	1713	Yes	10	0	0	3	0	0	0	0	0	0	7	1	0	1	0	0	#DIV/0!	1	Spring	2011-09-11	5:00	Night
474	2011	0962	Yes	10	2	0	2	0	1	0	3	0	0	2	3	2	1	0	66.6667	100	1	Winter	2011-08-01	09:30	Morning
2196	000	1722	Yes	10	5	0	3	2	0	0	0	0	0	0	3	2	1	3	66.6667	40	2	Spring	2011-09-11	9:30	Morning
2651	000	2177	Yes	10	5	0	0	5	0	0	0	0	0	0	6	5	1	0	83.3333	100	1	Spring	2011-09-20	21:00	Night
415	2011	0844	Yes	10	8	0	0	2	0	0	0	0	0	0	9	8	1	0	88.8889	100	1	Winter	2011-07-31	04:00	Night
2176	000	1702	Yes	11	1	0	0	0	0	9	0	1	0	0	2	1	1	0	50	100	1	Spring	2011-09-10	23:30	Night
2092	000	1618	Yes	11	6	0	0	0	0	5	0	0	0	0	4	3	1	3	75	50	2	Spring	2011-09-09	5:30	Night
1242	000	0768	Yes	11	8	0	2	1	0	0	0	0	0	0	7	6	1	2	85.7143	75	1	Winter	2011-08-22	12:30	Morning
14310	001	3837	Yes	13	12	0	0	1	0	0	0	0	0	0	8	7	1	4	87.5	63.6364	4	Autumn	2012-05-21	19:30	Night
707	000	0233	Yes	14	0	0	0	0	0	4	3	3	0	4	1	0	1	0	0	#DIV/0!	1	Winter	2011-08-11	9:00	Morning
1277	000	0803	Yes	14	5	0	4	5	0	0	0	0	0	0	3	2	1	2	66.6667	50	2	Winter	2011-08-23	6:00	Night
809	000	0335	Yes	15	11	0	0	0	2	0	0	0	0	0	10	9	1	2	90	81.8182	1	Winter	2011-08-13	12:00	Morning
1149	000	0675	Yes	15	12	0	0	3	0	0	0	0	0	0	11	10	1	2	90.9091	83.3333	1	Winter	2011-08-20	14:00	Afternoon
982	000	0508	Yes	18	8	0	0	2	0	2	0	0	0	6	7	6	1	2	85.7143	75	1	Winter	2011-08-17	2:30	Night
4536	000	4062	Yes	18	16	0	0	0	0	2	0	0	0	0	17	16	1	0	94.1176	100	1	Spring	2011-10-30	4:30	Dawn
314	2011	0642	Yes	19	0	1	0	6	0	5	3	1	0	3	1	0	1	0	0	#DIV/0!	1	Winter	2011-07-29	01:30	Night
2793	000	2319	Yes	19	14	0	4	1	0	0	0	0	0	0	13	12	1	2	92.3077	85.7143	1	Spring	2011-09-23	20:00	Dusk
2069	000	1595	Yes	20	4	0	9	4	0	3	0	0	0	0	4	3	1	1	75	75	0	Spring	2011-09-08	18:00	Afternoon
1174	000	0700	Yes	21	11	0	0	1	0	5	1	0	0	3	12	11	1	0	91.6667	100	1	Winter	2011-08-21	2:30	Night
1448	000	0974	Yes	29	9	0	6	6	0	8	0	0	0	0	8	7	1	2	87.5	77.7778	1	Winter	2011-08-26	19:30	Night
1452	000	0978	Yes	38	13	0	0	9	0	12	1	1	1	1	10	9	1	4	90	69.2308	3	Winter	2011-08-26	21:30	Night
1686	000	1212	No	0	0	0	0	0	0	0	0	0	0	0	2	0	2	0	0	#DIV/0!	2	Winter	2011-08-31	18:30	Dusk
2914	000	2440	No	0	0	0	0	0	0	0	0	0	0	0	2	0	2	0	0	#DIV/0!	2	Spring	2011-09-26	9:30	Morning
2952	000	2478	No	0	0	0	0	0	0	0	0	0	0	0	2	0	2	0	0	#DIV/0!	2	Spring	2011-09-27	4:30	Night
2953	000	2479	No	0	0	0	0	0	0	0	0	0	0	0	2	0	2	0	0	#DIV/0!	2	Spring	2011-09-27	5:00	Night
2989	000	2515	No	0	0	0	0	0	0	0	0	0	0	0	2	0	2	0	0	#DIV/0!	2	Spring	2011-09-27	23:00	Night
4063	000	3589	No	0	0	0	0	0	0	0	0	0	0	0	2	0	2	0	0	#DIV/0!	2	Spring	2011-10-20	8:00	Morning
4076	000	3602	No	0	0	0	0	0	0	0	0	0	0	0	2	0	2	0	0	#DIV/0!	2	Spring	2011-10-20	14:30	Afternoon
4102	000	3628	No	0	0	0	0	0	0	0	0	0	0	0	2	0	2	0	0	#DIV/0!	2	Spring	2011-10-21	3:30	Night
4232	000	3758	No	0	0	0	0	0	0	0	0	0	0	0	2	0	2	0	0	#DIV/0!	2	Spring	2011-10-23	20:30	Dusk
4403	000	3929	No	0	0	0	0	0	0	0	0	0	0	0	2	0	2	0	0	#DIV/0!	2	Spring	2011-10-27	10:00	Morning
4733	000	4259	No	0	0	0	0	0	0	0	0	0	0	0	2	0	2	0	0	#DIV/0!	2	Spring	2011-11-03	7:00	Morning
4827	000	4353	No	0	0	0	0	0	0	0	0	0	0	0	2	0	2	0	0	#DIV/0!	2	Spring	2011-11-05	6:00	Morning
4983	000	4509	No	0	0	0	0	0	0	0	0	0	0	0	2	0	2	0	0	#DIV/0!	2	Spring	2011-11-08	12:00	Morning
5238	000	4764	No	0	0	0	0	0	0	0	0	0	0	0	2	0	2	0	0	#DIV/0!	2	Spring	2011-11-13	19:30	Afternoon
5240	000	4766	No	0	0	0	0	0	0	0	0	0	0	0	2	0	2	0	0	#DIV/0!	2	Spring	2011-11-13	20:30	Dusk
5699	000	5225	No	0	0	0	0	0	0	0	0	0	0	0	2	0	2	0	0	#DIV/0!	2	Spring	2011-11-23	10:00	Morning
6219	000	5745	No	0	0	0	0	0	0	0	0	0	0	0	2	0	2	0	0	#DIV/0!	2	Summer	2011-12-04	6:00	Morning
6227	000	5753	No	0	0	0	0	0	0	0	0	0	0	0	2	0	2	0	0	#DIV/0!	2	Summer	2011-12-04	10:00	Morning
7373	000	6899	No	0	0	0	0	0	0	0	0	0	0	0	2	0	2	0	0	#DIV/0!	2	Summer	2011-12-28	7:00	Morning
7717	000	7243	No	0	0	0	0	0	0	0	0	0	0	0	2	0	2	0	0	#DIV/0!	2	Summer	2012-01-04	11:00	Morning
7748	000	7274	No	0	0	0	0	0	0	0	0	0	0	0	2	0	2	0	0	#DIV/0!	2	Summer	2012-01-05	2:30	Night
7803	000	7329	No	0	0	0	0	0	0	0	0	0	0	0	2	0	2	0	0	#DIV/0!	2	Summer	2012-01-06	6:00	Morning
8394	000	7920	No	0	0	0	0	0	0	0	0	0	0	0	2	0	2	0	0	#DIV/0!	2	Summer	2012-01-18	13:30	Afternoon
8539	000	8065	No	0	0	0	0	0	0	0	0	0	0	0	2	0	2	0	0	#DIV/0!	2	Summer	2012-01-21	14:00	Afternoon
8700	000	8226	No	0	0	0	0	0	0	0	0	0	0	0	2	0	2	0	0	#DIV/0!	2	Summer	2012-01-24	22:30	Night
8703	000	8229	No	0	0	0	0	0	0	0	0	0	0	0	2	0	2	0	0	#DIV/0!	2	Summer	2012-01-25	0:00	Night
8760	000	8286	No	0	0	0	0	0	0	0	0	0	0	0	2	0	2	0	0	#DIV/0!	2	Summer	2012-01-26	4:30	Dawn
8886	000	8412	No	0	0	0	0	0	0	0	0	0	0	0	2	0	2	0	0	#DIV/0!	2	Summer	2012-01-28	19:30	Afternoon
10437	000	9963	No	0	0	0	0	0	0	0	0	0	0	0	2	0	2	0	0	#DIV/0!	2	Autumn	2012-03-02	3:00	Night
13978	001	3505	No	0	0	0	0	0	0	0	0	0	0	0	2	0	2	0	0	#DIV/0!	2	Autumn	2012-05-14	21:30	Night
14266	001	3793	No	0	0	0	0	0	0	0	0	0	0	0	2	0	2	0	0	#DIV/0!	2	Autumn	2012-05-20	21:30	Night
2143	000	1669	Yes	1	0	0	0	0	0	0	0	0	0	1	2	0	2	0	0	#DIV/0!	2	Spring	2011-09-10	7:00	Dawn
2744	000	2270	Yes	1	0	0	0	0	0	1	0	0	0	0	2	0	2	0	0	#DIV/0!	2	Spring	2011-09-22	19:30	Dusk
1997	000	1523	Yes	2	1	0	0	0	0	1	0	0	0	0	3	1	2	0	33.3333	100	2	Spring	2011-09-07	6:00	Night
3838	000	3364	Yes	2	2	0	0	0	0	0	0	0	0	0	4	2	2	0	50	100	2	Spring	2011-10-15	15:30	Afternoon
1907	000	1433	Yes	3	0	0	0	0	0	3	0	0	0	0	2	0	2	0	0	#DIV/0!	2	Spring	2011-09-05	9:00	Morning
2908	000	2434	Yes	3	0	0	0	1	0	2	0	0	0	0	2	0	2	0	0	#DIV/0!	2	Spring	2011-09-26	6:30	Dawn
4341	000	3867	Yes	3	0	0	0	2	0	1	0	0	0	0	2	0	2	0	0	#DIV/0!	2	Spring	2011-10-26	3:00	Night
342	2011	0698	Yes	3	3	0	0	0	0	0	0	0	0	0	5	3	2	0	60	100	2	Winter	2011-07-29	15:30	Afternoon
223	2011	0460	Yes	4	4	0	0	0	0	0	0	0	0	0	6	4	2	0	66.6667	100	2	Winter	2011-07-27	04:00	Night
4474	000	4000	Yes	4	7	0	0	0	0	0	0	0	0	0	8	6	2	1	75	85.7143	1	Spring	2011-10-28	21:30	Night
667	000	0193	Yes	5	0	0	0	2	0	0	0	0	0	3	2	0	2	0	0	#DIV/0!	2	Winter	2011-08-10	13:00	Afternoon
4157	000	3683	Yes	5	2	0	0	1	0	2	0	0	0	0	0	0	2	0	0	#DIV/0!	2	Spring	2011-10-22	7:00	Morning
1234	000	0760	Yes	6	2	0	0	4	0	0	0	0	0	0	2	0	2	0	0	#DIV/0!	0	Winter	2011-08-22	8:30	Morning
2566	000	2092	Yes	6	3	0	0	1	0	1	0	1	0	0	5	3	2	0	60	100	2	Spring	2011-09-19	2:30	Night
2743	000	2269	Yes	6	6	0	0	0	0	0	0	0	0	0	8	6	2	0	75	100	2	Spring	2011-09-22	19:00	Dusk
155	2011	0324	Yes	6	7	1	0	0	0	0	0	0	0	0	9	7	2	0	77.7778	100	2	Winter	2011-07-25	18:00	Dusk
14408	001	3935	Yes	7	3	2	0	2	0	0	0	0	0	0	4	2	2	1	50	66.6667	1	Autumn	2012-05-23	20:30	Night
3774	000	3300	Yes	8	0	1	0	1	0	6	0	0	0	0	2	0	2	0	0	#DIV/0!	2	Spring	2011-10-14	7:30	Morning
1734	000	1260	Yes	8	2	0	0	5	0	1	0	0	0	0	4	2	2	0	50	100	2	Spring	2011-09-01	18:30	Dusk
6064	000	5590	Yes	8	7	0	0	1	0	0	0	0	0	0	9	7	2	0	77.7778	100	2	Summer	2011-12-01	0:30	Night
90	2011	0194	Yes	9	6	2	0	1	0	0	0	0	0	0	7	5	2	1	71.4286	83.3333	1	Winter	2011-07-24	09:30	Morning
14432	001	3959	Yes	10	0	0	0	10	0	0	0	0	0	0	2	0	2	0	0	#DIV/0!	2	Autumn	2012-05-24	8:30	Dawn
5337	000	4863	Yes	10	5	2	0	2	0	1	0	0	0	0	6	4	2	1	66.6667	80	1	Spring	2011-11-15	21:00	Dusk
1033	000	0559	Yes	10	6	0	0	2	0	0	0	0	0	2	7	5	2	1	71.4286	83.3333	1	Winter	2011-08-18	4:00	Night
576	000	0102	Yes	11	0	0	0	11	0	0	0	0	0	0	2	0	2	0	0	#DIV/0!	2	Winter	2011-08-08	15:30	Afternoon
216	2011	0446	Yes	11	1	2	0	4	0	2	0	0	0	2	3	1	2	0	33.3333	100	2	Winter	2011-07-27	00:30	Night
2018	000	1544	Yes	11	11	0	0	0	0	0	0	0	0	0	12	10	2	1	83.3333	90.9091	1	Spring	2011-09-07	16:30	Afternoon
1651	000	1177	Yes	12	1	0	0	3	0	3	2	1	0	2	3	1	2	0	33.3333	100	2	Winter	2011-08-31	1:00	Night
24	2011	0062	Yes	12	2	8	0	2	0	0	0	0	0	0	4	2	2	0	50	100	2	Winter	2011-07-23	00:30	Night
1309	000	0835	Yes	12	5	0	4	0	0	3	0	0	0	0	7	5	2	0	71.4286	100	2	Winter	2011-08-23	22:00	Night
3360	000	2886	Yes	12	5	0	1	3	0	3	0	0	0	0	6	4	2	1	66.6667	80	1	Spring	2011-10-05	16:30	Afternoon
4532	000	4058	Yes	12	12	0	0	0	0	0	0	0	0	0	12	10	2	2	83.3333	83.3333	0	Spring	2011-10-30	2:30	Night
1491	000	1017	Yes	13	2	0	4	2	0	1	0	3	0	1	4	2	2	0	50	100	2	Winter	2011-08-27	17:00	Afternoon
1580	000	1106	Yes	13	3	0	0	1	0	4	4	0	0	0	5	3	2	0	60	100	2	Winter	2011-08-29	13:30	Afternoon
257	2011	0528	Yes	13	11	0	0	2	0	0	0	0	0	0	12	10	2	1	83.3333	90.9091	1	Winter	2011-07-27	21:00	Night
940	000	0466	Yes	14	5	0	0	2	1	0	4	2	0	0	7	5	2	0	71.4286	100	2	Winter	2011-08-16	5:30	Night
1959	000	1485	Yes	15	0	0	0	0	0	0	13	0	0	2	2	0	2	0	0	#DIV/0!	2	Spring	2011-09-06	11:00	Morning
1627	000	1153	Yes	16	0	0	0	5	0	7	0	0	0	4	2	0	2	0	0	#DIV/0!	2	Winter	2011-08-30	13:00	Afternoon
75	2011	0164	Yes	18	4	3	0	2	0	3	3	0	0	3	5	3	2	1	60	75	1	Winter	2011-07-24	02:00	Night
3038	000	2564	Yes	18	9	0	0	6	0	3	0	0	0	0	11	9	2	0	81.8182	100	2	Spring	2011-09-28	23:30	Night
3131	000	2657	Yes	20	20	0	0	0	0	0	0	0	0	0	13	11	2	7	84.6154	61.1111	7	Spring	2011-09-30	22:00	Night
1431	000	0957	Yes	21	6	0	3	0	0	1	2	2	0	7	5	3	2	3	60	50	1	Winter	2011-08-26	11:00	Morning
2206	000	1732	Yes	21	6	4	1	8	0	0	0	0	0	2	8	6	2	0	75	100	2	Spring	2011-09-11	14:30	Afternoon
72	2011	0158	Yes	23	3	0	0	3	0	0	15	0	0	2	5	2	2	1	50	66.6667	2	Winter	2011-07-24	00:30	Night
1208	000	0734	Yes	23	6	0	0	5	0	4	0	0	0	8	7	5	2	1	71.4286	83.3333	1	Winter	2011-08-21	19:30	Night
1638	000	1164	Yes	24	4	1	3	4	0	10	1	0	0	1	6	4	2	0	66.6667	100	2	Winter	2011-08-30	18:30	Dusk
1647	000	1173	Yes	25	0	0	0	2	0	4	0	18	0	1	2	0	2	0	0	#DIV/0!	2	Winter	2011-08-30	23:00	Night
1986	000	1512	Yes	25	11	6	0	5	0	3	0	0	0	0	12	10	2	1	83.3333	90.9091	1	Spring	2011-09-07	0:30	Night
14248	001	3775	Yes	25	16	2	0	4	0	1	0	3	0	0	15	13	2	3	86.6667	81.25	1	Autumn	2012-05-20	12:30	Morning
2349	000	1875	Yes	27	7	0	0	4	0	8	1	2	0	5	8	6	2	1	75	85.7143	1	Spring	2011-09-14	14:00	Afternoon
1009	000	0535	Yes	28	3	0	1	3	0	7	8	0	0	6	4	2	2	1	50	66.6667	1	Winter	2011-08-17	16:00	Afternoon
511	000	0037	Yes	31	21	0	6	1	0	3	0	0	0	0	15	13	2	8	86.6667	61.9048	6	Winter	2011-08-07	7:00	Night
14332	001	3859	Yes	32	0	4	0	5	0	6	0	11	0	0	2	0	2	0	0	#DIV/0!	2	Autumn	2012-05-22	6:30	Night
1192	000	0718	Yes	34	1	0	1	2	0	6	20	0	0	4	3	1	2	0	33.3333	100	2	Winter	2011-08-21	11:30	Morning
1168	000	0694	Yes	34	9	5	2	3	0	4	1	2	0	8	7	5	2	4	71.4286	55.5556	2	Winter	2011-08-20	23:30	Night
1495	000	1021	Yes	38	6	3	0	12	0	6	0	1	1	9	8	6	2	0	75	100	2	Winter	2011-08-27	19:00	Dusk
14376	001	3903	Yes	52	25	0	0	25	0	1	1	0	0	0	23	21	2	4	91.3043	84	2	Autumn	2012-05-23	4:30	Night
1524	000	1050	No	0	0	0	0	0	0	0	0	0	0	0	3	0	3	0	0	#DIV/0!	3	Winter	2011-08-28	9:30	Morning
3250	000	2776	No	0	0	0	0	0	0	0	0	0	0	0	3	0	3	0	0	#DIV/0!	3	Spring	2011-10-03	9:30	Morning
4062	000	3588	No	0	0	0	0	0	0	0	0	0	0	0	3	0	3	0	0	#DIV/0!	3	Spring	2011-10-20	7:30	Morning
4203	000	3729	No	0	0	0	0	0	0	0	0	0	0	0	3	0	3	0	0	#DIV/0!	3	Spring	2011-10-23	6:00	Morning
4222	000	3748	No	0	0	0	0	0	0	0	0	0	0	0	3	0	3	0	0	#DIV/0!	3	Spring	2011-10-23	15:30	Afternoon
5142	000	4668	No	0	0	0	0	0	0	0	0	0	0	0	3	0	3	0	0	#DIV/0!	3	Spring	2011-11-11	19:30	Afternoon
5567	000	5093	No	0	0	0	0	0	0	0	0	0	0	0	3	0	3	0	0	#DIV/0!	3	Spring	2011-11-20	16:00	Afternoon
5638	000	5164	No	0	0	0	0	0	0	0	0	0	0	0	3	0	3	0	0	#DIV/0!	3	Spring	2011-11-22	3:30	Dawn
5697	000	5223	No	0	0	0	0	0	0	0	0	0	0	0	3	0	3	0	0	#DIV/0!	3	Spring	2011-11-23	9:00	Morning
5744	000	5270	No	0	0	0	0	0	0	0	0	0	0	0	3	0	3	0	0	#DIV/0!	3	Spring	2011-11-24	8:30	Morning
6621	000	6147	No	0	0	0	0	0	0	0	0	0	0	0	3	0	3	0	0	#DIV/0!	3	Summer	2011-12-12	15:00	Afternoon
7380	000	6906	No	0	0	0	0	0	0	0	0	0	0	0	3	0	3	0	0	#DIV/0!	3	Summer	2011-12-28	10:30	Morning
7425	000	6951	No	0	0	0	0	0	0	0	0	0	0	0	3	0	3	0	0	#DIV/0!	3	Summer	2011-12-29	9:00	Morning
7448	000	6974	No	0	0	0	0	0	0	0	0	0	0	0	3	0	3	0	0	#DIV/0!	3	Summer	2011-12-29	20:30	Afternoon
7686	000	7212	No	0	0	0	0	0	0	0	0	0	0	0	3	0	3	0	0	#DIV/0!	3	Summer	2012-01-03	19:30	Afternoon
8305	000	7831	No	0	0	0	0	0	0	0	0	0	0	0	3	0	3	0	0	#DIV/0!	3	Summer	2012-01-16	17:00	Afternoon
439	2011	0892	Yes	1	0	0	0	0	0	1	0	0	0	0	3	0	3	0	0	#DIV/0!	3	Winter	2011-07-31	16:00	Afternoon
13974	001	3501	Yes	1	1	0	0	0	0	0	0	0	0	0	4	1	3	0	25	100	3	Autumn	2012-05-14	19:30	Night
1366	000	0892	Yes	3	0	0	1	2	0	0	0	0	0	0	3	0	3	0	0	#DIV/0!	3	Winter	2011-08-25	2:30	Night
4385	000	3911	Yes	3	3	0	0	0	0	0	0	0	0	0	6	3	3	0	50	100	3	Spring	2011-10-27	1:00	Night
201	2011	0416	Yes	4	4	0	0	0	0	0	0	0	0	0	6	3	3	1	50	75	2	Winter	2011-07-26	17:00	Afternoon
13894	001	3421	Yes	5	0	0	0	5	0	0	0	0	0	0	3	0	3	0	0	#DIV/0!	3	Autumn	2012-05-13	3:30	Night
1264	000	0790	Yes	5	5	0	0	0	0	0	0	0	0	0	8	5	3	0	62.5	100	3	Winter	2011-08-22	23:30	Night
32	2011	0078	Yes	6	2	0	0	0	0	0	0	3	1	0	4	1	3	1	25	50	2	Winter	2011-07-23	04:30	Night
102	2011	0218	Yes	6	3	0	0	2	1	0	0	0	0	0	5	2	3	1	40	66.6667	2	Winter	2011-07-24	15:30	Afternoon
1262	000	0788	Yes	6	4	0	0	0	0	0	0	0	0	2	7	4	3	0	57.1429	100	3	Winter	2011-08-22	22:30	Night
3560	000	3086	Yes	7	0	0	0	4	0	3	0	0	0	0	3	0	3	0	0	#DIV/0!	3	Spring	2011-10-09	20:30	Night
4215	000	3741	Yes	7	3	0	0	2	0	2	0	0	0	0	6	3	3	0	50	100	3	Spring	2011-10-23	12:00	Morning
1587	000	1113	Yes	8	1	2	0	0	0	5	0	0	0	0	3	0	3	1	0	0	2	Winter	2011-08-29	17:00	Afternoon
117	2011	0248	Yes	9	3	0	0	1	0	3	0	2	0	0	6	3	3	0	50	100	3	Winter	2011-07-24	23:00	Night
13	2011	0040	Yes	9	5	0	0	2	1	1	0	0	0	0	7	4	3	1	57.1429	80	2	Winter	2011-07-22	19:00	Night
2616	000	2142	Yes	9	8	0	0	1	0	0	0	0	0	0	11	8	3	0	72.7273	100	3	Spring	2011-09-20	3:30	Night
2290	000	1816	Yes	10	0	0	0	4	0	6	0	0	0	0	3	0	3	0	0	#DIV/0!	3	Spring	2011-09-13	8:30	Morning
533	000	0059	Yes	10	5	1	0	4	0	0	0	0	0	0	8	5	3	0	62.5	100	3	Winter	2011-08-07	18:00	Dusk
161	2011	0336	Yes	10	6	0	0	3	0	0	0	1	0	0	8	5	3	1	62.5	83.3333	2	Winter	2011-07-25	21:00	Night
831	000	0357	Yes	10	6	0	0	0	0	2	0	2	0	0	8	5	3	1	62.5	83.3333	2	Winter	2011-08-13	23:00	Night
1367	000	0893	Yes	10	7	0	0	5	0	0	0	0	0	0	9	6	3	1	66.6667	85.7143	2	Winter	2011-08-25	3:00	Night
1497	000	1023	Yes	14	4	0	0	4	0	1	0	0	3	2	7	4	3	1	57.1429	80	3	Winter	2011-08-27	20:00	Night
2376	000	1902	Yes	14	5	0	3	6	0	0	0	0	0	0	6	3	3	2	50	60	1	Spring	2011-09-15	3:30	Night
763	000	0289	Yes	16	0	0	1	3	0	1	11	0	0	0	3	0	3	0	0	#DIV/0!	3	Winter	2011-08-12	13:00	Afternoon
2223	000	1749	Yes	16	4	0	0	7	0	0	0	1	1	3	7	4	3	0	57.1429	100	3	Spring	2011-09-11	23:00	Night
121	2011	0256	Yes	17	2	0	2	3	0	1	4	2	0	3	5	2	3	0	40	100	3	Winter	2011-07-25	01:00	Night
773	000	0299	Yes	17	6	0	5	2	0	4	0	0	0	0	8	5	3	1	62.5	83.3333	2	Winter	2011-08-12	18:00	Dusk
14323	001	3850	Yes	17	8	0	0	7	0	0	0	2	0	0	8	5	3	3	62.5	62.5	0	Autumn	2012-05-22	2:00	Night
36	2011	0086	Yes	17	10	2	0	0	0	1	4	0	0	0	12	9	3	1	75	90	2	Winter	2011-07-23	06:30	Night
1393	000	0919	Yes	19	1	0	10	6	0	0	0	1	0	1	4	1	3	0	25	100	3	Winter	2011-08-25	16:00	Afternoon
1026	000	0552	Yes	19	5	1	2	1	0	1	5	0	0	4	7	4	3	1	57.1429	80	2	Winter	2011-08-18	0:30	Night
331	2011	0676	Yes	22	2	3	0	9	0	2	0	2	0	4	5	2	3	0	40	100	3	Winter	2011-07-29	10:00	Morning
1218	000	0744	Yes	23	0	0	2	3	0	8	2	2	1	5	3	0	3	0	0	#DIV/0!	3	Winter	2011-08-22	0:30	Night
14405	001	3932	Yes	23	9	0	2	3	0	2	0	7	0	0	10	7	3	2	70	77.7778	1	Autumn	2012-05-23	19:00	Night
2178	000	1704	Yes	25	10	0	1	3	0	4	1	0	0	6	9	6	3	4	66.6667	60	1	Spring	2011-09-11	0:30	Night
1498	000	1024	Yes	27	7	0	5	3	0	5	3	1	0	3	10	7	3	1	70	87.5	3	Winter	2011-08-27	20:30	Night
1977	000	1503	Yes	30	12	0	0	1	0	6	6	1	0	4	12	9	3	3	75	75	0	Spring	2011-09-06	20:00	Night
1786	000	1312	Yes	31	14	0	0	8	0	5	0	0	0	4	16	13	3	1	81.25	92.8571	2	Spring	2011-09-02	20:30	Night
938	000	0464	Yes	46	3	4	7	1	0	8	9	10	0	4	6	3	3	0	50	100	3	Winter	2011-08-16	4:30	Night
1815	000	1341	No	0	0	0	0	0	0	0	0	0	0	0	4	0	4	0	0	#DIV/0!	4	Spring	2011-09-03	11:00	Morning
1925	000	1451	No	0	0	0	0	0	0	0	0	0	0	0	4	0	4	0	0	#DIV/0!	4	Spring	2011-09-05	18:00	Afternoon
2398	000	1924	No	0	0	0	0	0	0	0	0	0	0	0	4	0	4	0	0	#DIV/0!	4	Spring	2011-09-15	14:30	Afternoon
3949	000	3475	No	0	0	0	0	0	0	0	0	0	0	0	4	0	4	0	0	#DIV/0!	4	Spring	2011-10-17	23:00	Night
5146	000	4672	No	0	0	0	0	0	0	0	0	0	0	0	4	0	4	0	0	#DIV/0!	4	Spring	2011-11-11	21:30	Dusk
7863	000	7389	No	0	0	0	0	0	0	0	0	0	0	0	4	0	4	0	0	#DIV/0!	4	Summer	2012-01-07	12:00	Morning
10449	000	9975	No	0	0	0	0	0	0	0	0	0	0	0	4	0	4	0	0	#DIV/0!	4	Autumn	2012-03-02	9:00	Morning
2494	000	2020	Yes	4	0	0	0	0	0	4	0	0	0	0	4	0	4	0	0	#DIV/0!	4	Spring	2011-09-17	14:30	Afternoon
588	000	0114	Yes	9	2	0	5	0	0	2	0	0	0	0	6	2	4	0	33.3333	100	4	Winter	2011-08-08	21:30	Night
2414	000	1940	Yes	10	1	0	0	3	0	1	0	3	0	2	5	1	4	0	20	100	4	Spring	2011-09-15	22:30	Night
4436	000	3962	Yes	10	7	0	1	2	0	0	0	0	0	0	11	7	4	0	63.6364	100	4	Spring	2011-10-28	2:30	Night
2578	000	2104	Yes	11	7	0	0	3	0	1	0	0	0	0	10	6	4	1	60	85.7143	3	Spring	2011-09-19	8:30	Morning
2161	000	1687	Yes	11	9	0	0	1	0	0	1	0	0	0	13	8	4	1	66.6667	88.8889	4	Spring	2011-09-10	16:00	Afternoon
3309	000	2835	Yes	12	6	0	0	2	0	4	0	0	0	0	10	6	4	0	60	100	4	Spring	2011-10-04	15:00	Afternoon
665	000	0191	Yes	14	0	0	0	3	0	1	8	2	0	0	4	0	4	0	0	#DIV/0!	4	Winter	2011-08-10	12:00	Morning
879	000	0405	Yes	14	0	0	0	5	0	6	3	0	0	0	4	0	4	0	0	#DIV/0!	4	Winter	2011-08-14	23:00	Night
645	000	0171	Yes	14	12	0	0	1	0	1	0	0	0	0	15	11	4	1	73.3333	91.6667	3	Winter	2011-08-10	2:00	Night
1573	000	1099	Yes	16	1	1	1	2	0	5	3	3	0	0	5	1	4	0	20	100	4	Winter	2011-08-29	10:00	Morning
723	000	0249	Yes	18	10	0	1	0	0	4	0	1	0	2	13	9	4	1	69.2308	90	3	Winter	2011-08-11	17:00	Afternoon
1339	000	0865	Yes	22	13	0	1	5	0	4	1	2	1	3	14	10	4	3	71.4286	76.9231	1	Winter	2011-08-24	13:00	Afternoon
1163	000	0689	Yes	24	8	1	5	0	1	1	0	0	0	8	12	8	4	0	66.6667	100	4	Winter	2011-08-20	21:00	Night
1877	000	1403	Yes	24	8	9	0	6	0	1	0	0	0	0	11	7	4	1	63.6364	87.5	3	Spring	2011-09-04	18:00	Afternoon
1353	000	0879	Yes	26	13	1	6	0	0	6	0	0	0	0	14	10	4	3	71.4286	76.9231	1	Winter	2011-08-24	20:00	Night
2255	000	1781	Yes	26	19	4	0	3	0	0	0	0	0	0	18	14	4	5	77.7778	73.6842	1	Spring	2011-09-12	15:00	Afternoon
14406	001	3933	Yes	28	16	2	0	2	0	0	0	8	0	0	15	11	4	5	73.3333	68.75	1	Autumn	2012-05-23	19:30	Night
500	000	0026	Yes	44	22	0	0	11	0	7	1	0	0	3	24	20	4	2	83.3333	90.9091	2	Winter	2011-08-07	1:30	Night
2272	000	1798	Yes	47	3	0	4	10	0	13	14	0	0	3	7	3	4	0	42.8571	100	4	Spring	2011-09-12	23:30	Night
4329	000	3855	No	0	0	0	0	0	0	0	0	0	0	0	5	0	5	0	0	#DIV/0!	5	Spring	2011-10-25	21:00	Dusk
7480	000	7006	No	0	0	0	0	0	0	0	0	0	0	0	5	0	5	0	0	#DIV/0!	5	Summer	2011-12-30	12:30	Morning
3307	000	2833	Yes	3	0	1	0	2	0	0	0	0	0	0	5	0	5	0	0	#DIV/0!	5	Spring	2011-10-04	14:00	Afternoon
1088	000	0614	Yes	10	0	0	0	3	0	1	0	2	0	4	5	0	5	1	0	0	5	Winter	2011-08-19	7:30	Dawn
2750	000	2276	Yes	12	0	2	0	6	0	3	0	0	0	1	5	0	5	0	0	#DIV/0!	5	Spring	2011-09-22	22:30	Night
653	000	0179	Yes	14	8	0	0	6	0	0	0	0	0	0	12	7	5	1	58.3333	87.5	4	Winter	2011-08-10	6:00	Night
179	2011	0372	Yes	15	4	7	0	2	0	1	0	1	0	0	8	3	5	1	37.5	75	4	Winter	2011-07-26	06:00	Night
966	000	0492	Yes	23	6	0	10	3	0	4	0	0	0	0	11	6	5	0	54.5455	100	5	Winter	2011-08-16	18:30	Dusk
73	2011	0160	Yes	26	8	0	0	3	0	1	12	0	0	2	14	8	5	0	61.5385	100	6	Winter	2011-07-24	01:00	Night
1217	000	0743	Yes	28	5	2	2	9	0	4	0	0	0	6	9	4	5	1	44.4444	80	4	Winter	2011-08-22	0:00	Night
3551	000	3077	Yes	29	6	0	0	22	0	1	0	0	0	0	11	6	5	0	54.5455	100	5	Spring	2011-10-09	16:00	Afternoon
704	000	0230	Yes	41	13	1	0	11	0	12	0	3	0	1	17	12	5	1	70.5882	92.3077	4	Winter	2011-08-11	7:30	Dawn
1689	000	1215	Yes	48	9	1	0	14	0	6	6	3	0	4	14	9	5	0	64.2857	100	5	Winter	2011-08-31	20:00	Night
4314	000	3840	Yes	11	0	0	1	7	0	3	0	0	0	0	6	0	6	0	0	#DIV/0!	6	Spring	2011-10-25	13:30	Afternoon
813	000	0339	Yes	13	13	0	0	0	0	0	0	0	0	0	18	12	6	1	66.6667	92.3077	5	Winter	2011-08-13	14:00	Afternoon
130	2011	0274	Yes	16	5	0	1	2	0	0	6	0	0	2	11	5	6	1	45.4545	83.3333	6	Winter	2011-07-25	05:30	Night
447	2011	0908	Yes	19	3	0	0	1	0	4	7	4	0	0	9	3	6	0	33.3333	100	6	Winter	2011-07-31	20:00	Night
320	2011	0654	Yes	23	10	4	0	7	0	2	0	0	0	0	16	7	6	3	53.8462	70	6	Winter	2011-07-29	04:30	Night
2706	000	2232	Yes	25	13	8	0	3	0	0	0	1	0	0	19	13	6	0	68.4211	100	6	Spring	2011-09-22	0:30	Night
1970	000	1496	Yes	31	0	2	0	0	0	15	5	8	0	1	6	0	6	0	0	#DIV/0!	6	Spring	2011-09-06	16:30	Afternoon
1074	000	0600	Yes	62	25	2	2	13	0	8	1	2	0	9	27	21	6	6	77.7778	77.7778	2	Winter	2011-08-19	0:30	Night
4728	000	4254	No	0	0	0	0	0	0	0	0	0	0	0	7	0	7	0	0	#DIV/0!	7	Spring	2011-11-03	4:30	Dawn
2889	000	2415	Yes	17	14	0	0	3	0	0	0	0	0	0	19	12	7	2	63.1579	85.7143	5	Spring	2011-09-25	21:00	Night
710	000	0236	Yes	21	0	0	0	1	0	9	0	6	0	5	7	0	7	0	0	#DIV/0!	7	Winter	2011-08-11	10:30	Morning
2836	000	2362	No	0	0	0	0	0	0	0	0	0	0	0	8	0	8	0	0	#DIV/0!	8	Spring	2011-09-24	17:30	Afternoon
2076	000	1602	Yes	2	0	0	0	2	0	0	0	0	0	0	8	0	8	0	0	#DIV/0!	8	Spring	2011-09-08	21:30	Night
205	2011	0424	Yes	5	3	0	0	2	0	0	0	0	0	0	11	3	8	0	27.2727	100	8	Winter	2011-07-26	19:00	Night
2571	000	2097	Yes	15	11	0	0	4	0	0	0	0	0	0	19	11	8	0	57.8947	100	8	Spring	2011-09-19	5:00	Night
1352	000	0878	Yes	18	10	2	0	4	0	0	0	0	0	2	19	9	9	1	50	90	9	Winter	2011-08-24	19:30	Night
1023	000	0549	Yes	21	0	0	0	6	1	8	0	2	0	4	9	0	9	0	0	#DIV/0!	9	Winter	2011-08-17	23:00	Night
454	2011	0922	Yes	13	10	0	0	3	0	0	0	0	0	0	18	8	10	2	44.4444	80	8	Winter	2011-07-31	23:30	Night
298	2011	0610	Yes	22	4	3	0	0	0	4	11	0	0	0	12	2	10	2	16.6667	50	8	Winter	2011-07-28	17:30	Dusk
823	000	0349	Yes	49	41	0	1	0	0	2	0	5	0	0	46	36	10	5	78.2609	87.8049	5	Winter	2011-08-13	19:00	Dusk
804	000	0330	Yes	52	37	1	0	8	0	0	0	2	1	3	44	34	10	3	77.2727	91.8919	7	Winter	2011-08-13	9:30	Morning
4376	000	3902	Yes	7	0	0	0	0	0	0	0	0	0	0	11	0	11	0	0	#DIV/0!	11	Spring	2011-10-26	20:30	Dusk
1094	000	0620	Yes	25	10	0	3	4	1	0	0	2	0	5	11	7	11	3	38.8889	70	1	Winter	2011-08-19	10:30	Morning

## Sheet: PPV  & Sens
Line number	PPV=TP/(TP+FP)	Sensitivity=TPR=TP/(TP+FN)	Deviation	Season	Date	Time				PPV	Sens
9	100	50	0	Winter	2011-07-22	17:00			July	56.0524	80.0216
13	57.1429	80	2	Winter	2011-07-22	19:00			Aug	58.2365	81.9749
17	100	50	2	Winter	2011-07-22	21:00			Sept	47.4775	81.8457
20	100	25	6	Winter	2011-07-22	22:30			Oct-Apr	16.0869	81.8404
24	50	100	2	Winter	2011-07-23	00:30			May	67.3243	72.9447
32	25	50	2	Winter	2011-07-23	04:30
36	75	90	2	Winter	2011-07-23	06:30
40	100	100	0	Winter	2011-07-23	08:30
67	100	100	0	Winter	2011-07-23	22:00
72	50	66.6667	2	Winter	2011-07-24	00:30
73	61.5385	100	6	Winter	2011-07-24	01:00
75	60	75	1	Winter	2011-07-24	02:00
90	71.4286	83.3333	1	Winter	2011-07-24	09:30
97	100	100	0	Winter	2011-07-24	13:00
102	40	66.6667	2	Winter	2011-07-24	15:30
117	50	100	3	Winter	2011-07-24	23:00
121	40	100	3	Winter	2011-07-25	01:00
130	45.4545	83.3333	6	Winter	2011-07-25	05:30
137		0	5	Winter	2011-07-25	09:00
155	77.7778	100	2	Winter	2011-07-25	18:00
161	62.5	83.3333	2	Winter	2011-07-25	21:00
179	37.5	75	4	Winter	2011-07-26	06:00
201	50	75	2	Winter	2011-07-26	17:00
205	27.2727	100	8	Winter	2011-07-26	19:00
216	33.3333	100	2	Winter	2011-07-27	00:30
223	66.6667	100	2	Winter	2011-07-27	04:00
226	100	66.6667	1	Winter	2011-07-27	05:30
228	0		1	Winter	2011-07-27	06:30
240	83.3333	100	1	Winter	2011-07-27	12:30
257	83.3333	90.9091	1	Winter	2011-07-27	21:00
262	50	50	0	Winter	2011-07-27	23:30
281			0	Winter	2011-07-28	09:00
298	16.6667	50	8	Winter	2011-07-28	17:30
307	0		0	Winter	2011-07-28	22:00
314	0		1	Winter	2011-07-29	01:30
320	53.8462	70	6	Winter	2011-07-29	04:30
328	0		1	Winter	2011-07-29	08:30
329	0		1	Winter	2011-07-29	09:00
330	100	100	0	Winter	2011-07-29	09:30
331	40	100	3	Winter	2011-07-29	10:00
342	60	100	2	Winter	2011-07-29	15:30
348	100	100	0	Winter	2011-07-29	18:30
349	100	100	0	Winter	2011-07-29	19:00
362		0	1	Winter	2011-07-30	01:30
388			0	Winter	2011-07-30	14:30
395			0	Winter	2011-07-30	18:00
406			0	Winter	2011-07-30	23:30
415	88.8889	100	1	Winter	2011-07-31	04:00
437	0		1	Winter	2011-07-31	15:00
439	0		3	Winter	2011-07-31	16:00
441	100	100	0	Winter	2011-07-31	17:00
447	33.3333	100	6	Winter	2011-07-31	20:00
454	44.4444	80	8	Winter	2011-07-31	23:30
462			0	Winter	2011-08-01	03:30
474	66.6667	100	1	Winter	2011-08-01	09:30
500	83.3333	90.9091	2	Winter	2011-08-07	1:30
511	86.6667	61.9048	6	Winter	2011-08-07	7:00
521	66.6667	100	1	Winter	2011-08-07	12:00
528	0		1	Winter	2011-08-07	15:30
533	62.5	100	3	Winter	2011-08-07	18:00
576	0		2	Winter	2011-08-08	15:30
588	33.3333	100	4	Winter	2011-08-08	21:30
591			0	Winter	2011-08-08	23:00
592	100	100	0	Winter	2011-08-08	23:30
623			0	Winter	2011-08-09	15:00
638	100	50	2	Winter	2011-08-09	22:30
642	100	100	0	Winter	2011-08-10	0:30
643	100	100	0	Winter	2011-08-10	1:00
645	73.3333	91.6667	3	Winter	2011-08-10	2:00
646			0	Winter	2011-08-10	2:30
653	58.3333	87.5	4	Winter	2011-08-10	6:00
665	0		4	Winter	2011-08-10	12:00
667	0		2	Winter	2011-08-10	13:00
669	85.7143	85.7143	0	Winter	2011-08-10	14:00
675	100	100	0	Winter	2011-08-10	17:00
695		0	2	Winter	2011-08-11	3:00
697	100	75	2	Winter	2011-08-11	4:00
704	70.5882	92.3077	4	Winter	2011-08-11	7:30
707	0		1	Winter	2011-08-11	9:00
710	0		7	Winter	2011-08-11	10:30
723	69.2308	90	3	Winter	2011-08-11	17:00
763	0		3	Winter	2011-08-12	13:00
773	62.5	83.3333	2	Winter	2011-08-12	18:00
804	77.2727	91.8919	7	Winter	2011-08-13	9:30
809	90	81.8182	1	Winter	2011-08-13	12:00
813	66.6667	92.3077	5	Winter	2011-08-13	14:00
823	78.2609	87.8049	5	Winter	2011-08-13	19:00
831	62.5	83.3333	2	Winter	2011-08-13	23:00
838			0	Winter	2011-08-14	2:30
879	0		4	Winter	2011-08-14	23:00
903	100	100	0	Winter	2011-08-15	11:00
938	50	100	3	Winter	2011-08-16	4:30
940	71.4286	100	2	Winter	2011-08-16	5:30
942			0	Winter	2011-08-16	6:30
953		0	2	Winter	2011-08-16	12:00
966	54.5455	100	5	Winter	2011-08-16	18:30
976	100	100	0	Winter	2011-08-16	23:30
982	85.7143	75	1	Winter	2011-08-17	2:30
989			0	Winter	2011-08-17	6:00
995	66.6667	66.6667	0	Winter	2011-08-17	9:00
1009	50	66.6667	1	Winter	2011-08-17	16:00
1023	0		9	Winter	2011-08-17	23:00
1026	57.1429	80	2	Winter	2011-08-18	0:30
1033	71.4286	83.3333	1	Winter	2011-08-18	4:00
1074	77.7778	77.7778	2	Winter	2011-08-19	0:30
1081	100	33.3333	2	Winter	2011-08-19	4:00
1082	100	33.3333	4	Winter	2011-08-19	4:30
1088	0	0	5	Winter	2011-08-19	7:30
1094	38.8889	70	1	Winter	2011-08-19	10:30
1134	100	100	0	Winter	2011-08-20	6:30
1149	90.9091	83.3333	1	Winter	2011-08-20	14:00
1163	66.6667	100	4	Winter	2011-08-20	21:00
1168	71.4286	55.5556	2	Winter	2011-08-20	23:30
1174	91.6667	100	1	Winter	2011-08-21	2:30
1181			0	Winter	2011-08-21	6:00
1192	33.3333	100	2	Winter	2011-08-21	11:30
1208	71.4286	83.3333	1	Winter	2011-08-21	19:30
1217	44.4444	80	4	Winter	2011-08-22	0:00
1218	0		3	Winter	2011-08-22	0:30
1219	100	85.7143	1	Winter	2011-08-22	1:00
1234	0		0	Winter	2011-08-22	8:30
1237	0		1	Winter	2011-08-22	10:00
1238	100	100	0	Winter	2011-08-22	10:30
1242	85.7143	75	1	Winter	2011-08-22	12:30
1262	57.1429	100	3	Winter	2011-08-22	22:30
1264	62.5	100	3	Winter	2011-08-22	23:30
1277	66.6667	50	2	Winter	2011-08-23	6:00
1309	71.4286	100	2	Winter	2011-08-23	22:00
1314			0	Winter	2011-08-24	0:30
1332	100	100	0	Winter	2011-08-24	9:30
1339	71.4286	76.9231	1	Winter	2011-08-24	13:00
1352	50	90	9	Winter	2011-08-24	19:30
1353	71.4286	76.9231	1	Winter	2011-08-24	20:00
1364	50	100	1	Winter	2011-08-25	1:30
1366	0		3	Winter	2011-08-25	2:30
1367	66.6667	85.7143	2	Winter	2011-08-25	3:00
1393	25	100	3	Winter	2011-08-25	16:00
1394	50	100	1	Winter	2011-08-25	16:30
1431	60	50	1	Winter	2011-08-26	11:00
1448	87.5	77.7778	1	Winter	2011-08-26	19:30
1452	90	69.2308	3	Winter	2011-08-26	21:30
1465	100	100	5	Winter	2011-08-27	4:00
1491	50	100	2	Winter	2011-08-27	17:00
1495	75	100	2	Winter	2011-08-27	19:00
1497	57.1429	80	3	Winter	2011-08-27	20:00
1498	70	87.5	3	Winter	2011-08-27	20:30
1524	0		3	Winter	2011-08-28	9:30
1535			0	Winter	2011-08-28	15:00
1536	100	100	0	Winter	2011-08-28	15:30
1560	100	100	0	Winter	2011-08-29	3:30
1573	20	100	4	Winter	2011-08-29	10:00
1580	60	100	2	Winter	2011-08-29	13:30
1587	0	0	2	Winter	2011-08-29	17:00
1605	100	100	0	Winter	2011-08-30	2:00
1627	0		2	Winter	2011-08-30	13:00
1638	66.6667	100	2	Winter	2011-08-30	18:30
1647	0		2	Winter	2011-08-30	23:00
1651	33.3333	100	2	Winter	2011-08-31	1:00
1656			0	Winter	2011-08-31	3:30
1671	0		1	Winter	2011-08-31	11:00
1684		0	1	Winter	2011-08-31	17:30
1686	0		2	Winter	2011-08-31	18:30
1689	64.2857	100	5	Winter	2011-08-31	20:00
1690	100	83.3333	1	Winter	2011-08-31	20:30
1717	0		1	Spring	2011-09-01	10:00
1724			0	Spring	2011-09-01	13:30
1734	50	100	2	Spring	2011-09-01	18:30
1774			0	Spring	2011-09-02	14:30
1780	0		1	Spring	2011-09-02	17:30
1786	81.25	92.8571	2	Spring	2011-09-02	20:30
1799	0		1	Spring	2011-09-03	3:00
1807	100	100	0	Spring	2011-09-03	7:00
1815	0		4	Spring	2011-09-03	11:00
1823	0		1	Spring	2011-09-03	15:00
1862	0		1	Spring	2011-09-04	10:30
1877	63.6364	87.5	3	Spring	2011-09-04	18:00
1886			0	Spring	2011-09-04	22:30
1887	75	100	1	Spring	2011-09-04	23:00
1899	0		1	Spring	2011-09-05	5:00
1907	0		2	Spring	2011-09-05	9:00
1920	50	100	1	Spring	2011-09-05	15:30
1925	0		4	Spring	2011-09-05	18:00
1950	100	64.7059	6	Spring	2011-09-06	6:30
1959	0		2	Spring	2011-09-06	11:00
1970	0		6	Spring	2011-09-06	16:30
1977	75	75	0	Spring	2011-09-06	20:00
1986	83.3333	90.9091	1	Spring	2011-09-07	0:30
1997	33.3333	100	2	Spring	2011-09-07	6:00
2014	0		1	Spring	2011-09-07	14:30
2018	83.3333	90.9091	1	Spring	2011-09-07	16:30
2026			0	Spring	2011-09-07	20:30
2032	100	100	0	Spring	2011-09-07	23:30
2060	100	66.6667	1	Spring	2011-09-08	13:30
2069	75	75	0	Spring	2011-09-08	18:00
2071	100	100	0	Spring	2011-09-08	19:00
2076	0		8	Spring	2011-09-08	21:30
2090	66.6667	66.6667	0	Spring	2011-09-09	4:30
2092	75	50	2	Spring	2011-09-09	5:30
2097			0	Spring	2011-09-09	8:00
2129			0	Spring	2011-09-10	0:00
2132			0	Spring	2011-09-10	1:30
2137	100	33.3333	2	Spring	2011-09-10	4:00
2143	0		2	Spring	2011-09-10	7:00
2146	50	33.3333	1	Spring	2011-09-10	8:30
2161	66.6667	88.8889	4	Spring	2011-09-10	16:00
2176	50	100	1	Spring	2011-09-10	23:30
2178	66.6667	60	1	Spring	2011-09-11	0:30
2187	0		1	Spring	2011-09-11	5:00
2196	66.6667	40	2	Spring	2011-09-11	9:30
2206	75	100	2	Spring	2011-09-11	14:30
2223	57.1429	100	3	Spring	2011-09-11	23:00
2227	100	100	0	Spring	2011-09-12	1:00
2255	77.7778	73.6842	1	Spring	2011-09-12	15:00
2272	42.8571	100	4	Spring	2011-09-12	23:30
2289	0		1	Spring	2011-09-13	8:00
2290	0		3	Spring	2011-09-13	8:30
2339	100	100	0	Spring	2011-09-14	9:00
2348	100	57.1429	3	Spring	2011-09-14	13:30
2349	75	85.7143	1	Spring	2011-09-14	14:00
2360	100	100	0	Spring	2011-09-14	19:30
2375	100	60	2	Spring	2011-09-15	3:00
2376	50	60	1	Spring	2011-09-15	3:30
2398	0		4	Spring	2011-09-15	14:30
2408	66.6667	100	1	Spring	2011-09-15	19:30
2414	20	100	4	Spring	2011-09-15	22:30
2427	100	40	3	Spring	2011-09-16	5:00
2430	100	100	1	Spring	2011-09-16	6:30
2450			0	Spring	2011-09-16	16:30
2454			0	Spring	2011-09-16	18:30
2460	100	60	4	Spring	2011-09-16	21:30
2472			0	Spring	2011-09-17	3:30
2474	0		1	Spring	2011-09-17	4:30
2485	0		1	Spring	2011-09-17	10:00
2490	0		1	Spring	2011-09-17	12:30
2494	0		4	Spring	2011-09-17	14:30
2505	50	100	0	Spring	2011-09-17	20:00
2508			0	Spring	2011-09-17	21:30
2523	100	100	0	Spring	2011-09-18	5:00
2559	66.6667	100	1	Spring	2011-09-18	23:00
2563	66.6667	100	1	Spring	2011-09-19	1:00
2566	60	100	2	Spring	2011-09-19	2:30
2571	57.8947	100	8	Spring	2011-09-19	5:00
2572	0		1	Spring	2011-09-19	5:30
2578	60	85.7143	3	Spring	2011-09-19	8:30
2600	66.6667	100	1	Spring	2011-09-19	19:30
2607			0	Spring	2011-09-19	23:00
2608			0	Spring	2011-09-19	23:30
2616	72.7273	100	3	Spring	2011-09-20	3:30
2631	100	80	3	Spring	2011-09-20	11:00
2642			0	Spring	2011-09-20	16:30
2644		0	1	Spring	2011-09-20	17:30
2651	83.3333	100	1	Spring	2011-09-20	21:00
2658			0	Spring	2011-09-21	0:30
2670			0	Spring	2011-09-21	6:30
2671			0	Spring	2011-09-21	7:00
2706	68.4211	100	6	Spring	2011-09-22	0:30
2719		0	2	Spring	2011-09-22	7:00
2724			0	Spring	2011-09-22	9:30
2727			0	Spring	2011-09-22	11:00
2731			0	Spring	2011-09-22	13:00
2739	0		1	Spring	2011-09-22	17:00
2743	75	100	2	Spring	2011-09-22	19:00
2744	0		2	Spring	2011-09-22	19:30
2750	0		5	Spring	2011-09-22	22:30
2761	0		1	Spring	2011-09-23	4:00
2784			0	Spring	2011-09-23	15:30
2793	92.3077	85.7143	1	Spring	2011-09-23	20:00
2812			0	Spring	2011-09-24	5:30
2831			0	Spring	2011-09-24	15:00
2833			0	Spring	2011-09-24	16:00
2836	0		8	Spring	2011-09-24	17:30
2845	100	20	4	Spring	2011-09-24	22:00
2861			0	Spring	2011-09-25	7:00
2869			0	Spring	2011-09-25	11:00
2873			0	Spring	2011-09-25	13:00
2875	0		1	Spring	2011-09-25	14:00
2887	100	85.7143	1	Spring	2011-09-25	20:00
2889	63.1579	85.7143	5	Spring	2011-09-25	21:00
2897	0		1	Spring	2011-09-26	1:00
2901			0	Spring	2011-09-26	3:00
2908	0		2	Spring	2011-09-26	6:30
2909	100	100	0	Spring	2011-09-26	7:00
2914	0		2	Spring	2011-09-26	9:30
2916			0	Spring	2011-09-26	10:30
2935	0		1	Spring	2011-09-26	20:00
2936			0	Spring	2011-09-26	20:30
2939	0		1	Spring	2011-09-26	22:00
2952	0		2	Spring	2011-09-27	4:30
2953	0		2	Spring	2011-09-27	5:00
2971	75	100	1	Spring	2011-09-27	14:00
2973			0	Spring	2011-09-27	15:00
2989	0		2	Spring	2011-09-27	23:00
2992			0	Spring	2011-09-28	0:30
3007	0		1	Spring	2011-09-28	8:00
3013			0	Spring	2011-09-28	11:00
3017			0	Spring	2011-09-28	13:00
3038	81.8182	100	2	Spring	2011-09-28	23:30
3049			0	Spring	2011-09-29	5:00
3065			0	Spring	2011-09-29	13:00
3069			0	Spring	2011-09-29	15:00
3073			0	Spring	2011-09-29	17:00
3088			0	Spring	2011-09-30	0:30
3090			0	Spring	2011-09-30	1:30
3099			0	Spring	2011-09-30	6:00
3100			0	Spring	2011-09-30	6:30
3107			0	Spring	2011-09-30	10:00
3122	100	100	0	Spring	2011-09-30	17:30
3131	84.6154	61.1111	7	Spring	2011-09-30	22:00
3140	0		1	Spring	2011-10-01	2:30
3145			0	Spring	2011-10-01	5:00
3159			0	Spring	2011-10-01	12:00
3167			0	Spring	2011-10-01	16:00
3194			0	Spring	2011-10-02	5:30
3201			0	Spring	2011-10-02	9:00
3225	0		1	Spring	2011-10-02	21:00
3247			0	Spring	2011-10-03	8:00
3248			0	Spring	2011-10-03	8:30
3250	0		3	Spring	2011-10-03	9:30
3255	0		1	Spring	2011-10-03	12:00
3267	50	100	1	Spring	2011-10-03	18:00
3283	100	100	0	Spring	2011-10-04	2:00
3285			0	Spring	2011-10-04	3:00
3299	100	75	1	Spring	2011-10-04	10:00
3305	0		1	Spring	2011-10-04	13:00
3307	0		5	Spring	2011-10-04	14:00
3309	60	100	4	Spring	2011-10-04	15:00
3324			0	Spring	2011-10-04	22:30
3350	0		1	Spring	2011-10-05	11:30
3359			0	Spring	2011-10-05	16:00
3360	66.6667	80	1	Spring	2011-10-05	16:30
3389			0	Spring	2011-10-06	7:00
3391			0	Spring	2011-10-06	8:00
3411			0	Spring	2011-10-06	18:00
3466			0	Spring	2011-10-07	21:30
3476			0	Spring	2011-10-08	2:30
3481			0	Spring	2011-10-08	5:00
3483			0	Spring	2011-10-08	6:00
3506			0	Spring	2011-10-08	17:30
3508			0	Spring	2011-10-08	18:30
3513			0	Spring	2011-10-08	21:00
3517			0	Spring	2011-10-08	23:00
3533	75	100	1	Spring	2011-10-09	7:00
3551	54.5455	100	5	Spring	2011-10-09	16:00
3554			0	Spring	2011-10-09	17:30
3560	0		3	Spring	2011-10-09	20:30
3572			0	Spring	2011-10-10	2:30
3608			0	Spring	2011-10-10	20:30
3613	0		1	Spring	2011-10-10	23:00
3614	0		1	Spring	2011-10-10	23:30
3619			0	Spring	2011-10-11	2:00
3623			0	Spring	2011-10-11	4:00
3650			0	Spring	2011-10-11	17:30
3661			0	Spring	2011-10-11	23:00
3684	0		1	Spring	2011-10-12	10:30
3703			0	Spring	2011-10-12	20:00
3717			0	Spring	2011-10-13	3:00
3728			0	Spring	2011-10-13	8:30
3729			0	Spring	2011-10-13	9:00
3731			0	Spring	2011-10-13	10:00
3735			0	Spring	2011-10-13	12:00
3738	85.7143	100	1	Spring	2011-10-13	13:30
3744			0	Spring	2011-10-13	16:30
3756	0		1	Spring	2011-10-13	22:30
3774	0		2	Spring	2011-10-14	7:30
3779	50	100	1	Spring	2011-10-14	10:00
3782			0	Spring	2011-10-14	11:30
3785			0	Spring	2011-10-14	13:00
3794			0	Spring	2011-10-14	17:30
3829			0	Spring	2011-10-15	11:00
3830			0	Spring	2011-10-15	11:30
3831	100	100	0	Spring	2011-10-15	12:00
3832	100	25	3	Spring	2011-10-15	12:30
3838	50	100	2	Spring	2011-10-15	15:30
3845	0		1	Spring	2011-10-15	19:00
3858			0	Spring	2011-10-16	1:30
3871			0	Spring	2011-10-16	8:00
3880	0		1	Spring	2011-10-16	12:30
3889			0	Spring	2011-10-16	17:00
3897			0	Spring	2011-10-16	21:00
3906			0	Spring	2011-10-17	1:30
3921			0	Spring	2011-10-17	9:00
3929			0	Spring	2011-10-17	13:00
3949	0		4	Spring	2011-10-17	23:00
3951			0	Spring	2011-10-18	0:00
3957			0	Spring	2011-10-18	3:00
3960			0	Spring	2011-10-18	4:30
3961			0	Spring	2011-10-18	5:00
3967			0	Spring	2011-10-18	8:00
3971			0	Spring	2011-10-18	10:00
3988			0	Spring	2011-10-18	18:30
3991			0	Spring	2011-10-18	20:00
4005			0	Spring	2011-10-19	3:00
4018	0		1	Spring	2011-10-19	9:30
4033			0	Spring	2011-10-19	17:00
4034			0	Spring	2011-10-19	17:30
4046	0		1	Spring	2011-10-19	23:30
4054			0	Spring	2011-10-20	3:30
4062	0		3	Spring	2011-10-20	7:30
4063	0		2	Spring	2011-10-20	8:00
4064			0	Spring	2011-10-20	8:30
4074	100	100	5	Spring	2011-10-20	13:30
4076	0		2	Spring	2011-10-20	14:30
4083			0	Spring	2011-10-20	18:00
4093	0		1	Spring	2011-10-20	23:00
4098			0	Spring	2011-10-21	1:30
4102	0		2	Spring	2011-10-21	3:30
4104			0	Spring	2011-10-21	4:30
4106	0		1	Spring	2011-10-21	5:30
4121	0		1	Spring	2011-10-21	13:00
4130			0	Spring	2011-10-21	17:30
4140			0	Spring	2011-10-21	22:30
4154			0	Spring	2011-10-22	5:30
4157	0		2	Spring	2011-10-22	7:00
4161			0	Spring	2011-10-22	9:00
4198	100	100	0	Spring	2011-10-23	3:30
4203	0		3	Spring	2011-10-23	6:00
4209	100	50	1	Spring	2011-10-23	9:00
4215	50	100	3	Spring	2011-10-23	12:00
4222	0		3	Spring	2011-10-23	15:30
4232	0		2	Spring	2011-10-23	20:30
4254	0		1	Spring	2011-10-24	7:30
4258		0	1	Spring	2011-10-24	9:30
4260	0		1	Spring	2011-10-24	10:30
4285	100	50	1	Spring	2011-10-24	23:00
4314	0		6	Spring	2011-10-25	13:30
4329	0		5	Spring	2011-10-25	21:00
4334	100	100	0	Spring	2011-10-25	23:30
4337			0	Spring	2011-10-26	1:00
4341	0		2	Spring	2011-10-26	3:00
4348	100	100	0	Spring	2011-10-26	6:30
4355	100	100	0	Spring	2011-10-26	10:00
4356			0	Spring	2011-10-26	10:30
4362	0		1	Spring	2011-10-26	13:30
4364			0	Spring	2011-10-26	14:30
4376	0		11	Spring	2011-10-26	20:30
4385	50	100	3	Spring	2011-10-27	1:00
4394	0		1	Spring	2011-10-27	5:30
4398	66.6667	100	1	Spring	2011-10-27	7:30
4403	0		2	Spring	2011-10-27	10:00
4436	63.6364	100	4	Spring	2011-10-28	2:30
4452			0	Spring	2011-10-28	10:30
4455			0	Spring	2011-10-28	12:00
4474	75	85.7143	1	Spring	2011-10-28	21:30
4479		0	2	Spring	2011-10-29	0:00
4498	0		1	Spring	2011-10-29	9:30
4532	83.3333	83.3333	0	Spring	2011-10-30	2:30
4536	94.1176	100	1	Spring	2011-10-30	4:30
4540	80	80	0	Spring	2011-10-30	6:30
4581			0	Spring	2011-10-31	3:00
4593			0	Spring	2011-10-31	9:00
4611			0	Spring	2011-10-31	18:00
4619			0	Spring	2011-10-31	22:00
4620			0	Spring	2011-10-31	22:30
4686			0	Spring	2011-11-02	7:30
4697			0	Spring	2011-11-02	13:00
4699			0	Spring	2011-11-02	14:00
4706	0		1	Spring	2011-11-02	17:30
4713			0	Spring	2011-11-02	21:00
4728	0		7	Spring	2011-11-03	4:30
4731			0	Spring	2011-11-03	6:00
4732			0	Spring	2011-11-03	6:30
4733	0		2	Spring	2011-11-03	7:00
4778			0	Spring	2011-11-04	5:30
4782			0	Spring	2011-11-04	7:30
4787			0	Spring	2011-11-04	10:00
4794			0	Spring	2011-11-04	13:30
4819			0	Spring	2011-11-05	2:00
4827	0		2	Spring	2011-11-05	6:00
4836			0	Spring	2011-11-05	10:30
4846			0	Spring	2011-11-05	15:30
4857			0	Spring	2011-11-05	21:00
4860			0	Spring	2011-11-05	22:30
4863			0	Spring	2011-11-06	0:00
4873			0	Spring	2011-11-06	5:00
4899			0	Spring	2011-11-06	18:00
4905			0	Spring	2011-11-06	21:00
4907			0	Spring	2011-11-06	22:00
4918			0	Spring	2011-11-07	3:30
4921	0		1	Spring	2011-11-07	5:00
4925			0	Spring	2011-11-07	7:00
4937			0	Spring	2011-11-07	13:00
4948	100	66.6667	1	Spring	2011-11-07	18:30
4952	0		1	Spring	2011-11-07	20:30
4955	100	85.7143	1	Spring	2011-11-07	22:00
4960			0	Spring	2011-11-08	0:30
4981	0		1	Spring	2011-11-08	11:00
4983	0		2	Spring	2011-11-08	12:00
4993	0		1	Spring	2011-11-08	17:00
4994			0	Spring	2011-11-08	17:30
4999			0	Spring	2011-11-08	20:00
5009			0	Spring	2011-11-09	1:00
5026			0	Spring	2011-11-09	9:30
5031			0	Spring	2011-11-09	12:00
5046			0	Spring	2011-11-09	19:30
5062			0	Spring	2011-11-10	3:30
5085			0	Spring	2011-11-10	15:00
5100			0	Spring	2011-11-10	22:30
5113	0		1	Spring	2011-11-11	5:00
5119			0	Spring	2011-11-11	8:00
5126	100	66.6667	1	Spring	2011-11-11	11:30
5127	0		1	Spring	2011-11-11	12:00
5142	0		3	Spring	2011-11-11	19:30
5146	0		4	Spring	2011-11-11	21:30
5166			0	Spring	2011-11-12	7:30
5175			0	Spring	2011-11-12	12:00
5178			0	Spring	2011-11-12	13:30
5186			0	Spring	2011-11-12	17:30
5191			0	Spring	2011-11-12	20:00
5202			0	Spring	2011-11-13	1:30
5230			0	Spring	2011-11-13	15:30
5236			0	Spring	2011-11-13	18:30
5238	0		2	Spring	2011-11-13	19:30
5240	0		2	Spring	2011-11-13	20:30
5246		0	1	Spring	2011-11-13	23:30
5258			0	Spring	2011-11-14	5:30
5274			0	Spring	2011-11-14	13:30
5282			0	Spring	2011-11-14	17:30
5295			0	Spring	2011-11-15	0:00
5304			0	Spring	2011-11-15	4:30
5328			0	Spring	2011-11-15	16:30
5337	66.6667	80	1	Spring	2011-11-15	21:00
5345			0	Spring	2011-11-16	1:00
5349			0	Spring	2011-11-16	3:00
5366			0	Spring	2011-11-16	11:30
5368			0	Spring	2011-11-16	12:30
5372			0	Spring	2011-11-16	14:30
5381			0	Spring	2011-11-16	19:00
5387			0	Spring	2011-11-16	22:00
5395	100	100	0	Spring	2011-11-17	2:00
5410			0	Spring	2011-11-17	9:30
5412			0	Spring	2011-11-17	10:30
5431	0		1	Spring	2011-11-17	20:00
5456			0	Spring	2011-11-18	8:30
5461			0	Spring	2011-11-18	11:00
5485	0		1	Spring	2011-11-18	23:00
5489			0	Spring	2011-11-19	1:00
5492			0	Spring	2011-11-19	2:30
5503			0	Spring	2011-11-19	8:00
5509			0	Spring	2011-11-19	11:00
5514			0	Spring	2011-11-19	13:30
5516	100	100	0	Spring	2011-11-19	14:30
5518			0	Spring	2011-11-19	15:30
5520			0	Spring	2011-11-19	16:30
5521			0	Spring	2011-11-19	17:00
5539			0	Spring	2011-11-20	2:00
5540			0	Spring	2011-11-20	2:30
5562			0	Spring	2011-11-20	13:30
5565			0	Spring	2011-11-20	15:00
5567	0		3	Spring	2011-11-20	16:00
5575	0		1	Spring	2011-11-20	20:00
5577			0	Spring	2011-11-20	21:00
5580			0	Spring	2011-11-20	22:30
5581	0		1	Spring	2011-11-20	23:00
5582	0		1	Spring	2011-11-20	23:30
5588			0	Spring	2011-11-21	2:30
5626			0	Spring	2011-11-21	21:30
5638	0		3	Spring	2011-11-22	3:30
5653	0		1	Spring	2011-11-22	11:00
5657	0		1	Spring	2011-11-22	13:00
5690			0	Spring	2011-11-23	5:30
5693			0	Spring	2011-11-23	7:00
5697	0		3	Spring	2011-11-23	9:00
5699	0		2	Spring	2011-11-23	10:00
5723			0	Spring	2011-11-23	22:00
5744	0		3	Spring	2011-11-24	8:30
5761			0	Spring	2011-11-24	17:00
5788			0	Spring	2011-11-25	6:30
5794	0		1	Spring	2011-11-25	9:30
5806			0	Spring	2011-11-25	15:30
5807			0	Spring	2011-11-25	16:00
5815			0	Spring	2011-11-25	20:00
5818			0	Spring	2011-11-25	21:30
5819			0	Spring	2011-11-25	22:00
5823			0	Spring	2011-11-26	0:00
5826			0	Spring	2011-11-26	1:30
5859			0	Spring	2011-11-26	18:00
5879			0	Spring	2011-11-27	4:00
5884			0	Spring	2011-11-27	6:30
5897			0	Spring	2011-11-27	13:00
5899			0	Spring	2011-11-27	14:00
5902			0	Spring	2011-11-27	15:30
5903			0	Spring	2011-11-27	16:00
5923			0	Spring	2011-11-28	2:00
5924			0	Spring	2011-11-28	2:30
5971			0	Spring	2011-11-29	2:00
5995			0	Spring	2011-11-29	14:00
5996			0	Spring	2011-11-29	14:30
6000			0	Spring	2011-11-29	16:30
6008			0	Spring	2011-11-29	20:30
6027			0	Spring	2011-11-30	6:00
6045	0		1	Spring	2011-11-30	15:00
6064	77.7778	100	2	Summer	2011-12-01	0:30
6081	0		1	Summer	2011-12-01	9:00
6095			0	Summer	2011-12-01	16:00
6101			0	Summer	2011-12-01	19:00
6112			0	Summer	2011-12-02	0:30
6113			0	Summer	2011-12-02	1:00
6114			0	Summer	2011-12-02	1:30
6119			0	Summer	2011-12-02	4:00
6136			0	Summer	2011-12-02	12:30
6144			0	Summer	2011-12-02	16:30
6146			0	Summer	2011-12-02	17:30
6150			0	Summer	2011-12-02	19:30
6157			0	Summer	2011-12-02	23:00
6163			0	Summer	2011-12-03	2:00
6166			0	Summer	2011-12-03	3:30
6173			0	Summer	2011-12-03	7:00
6180			0	Summer	2011-12-03	10:30
6199			0	Summer	2011-12-03	20:00
6210			0	Summer	2011-12-04	1:30
6219	0		2	Summer	2011-12-04	6:00
6221			0	Summer	2011-12-04	7:00
6227	0		2	Summer	2011-12-04	10:00
6231	0		1	Summer	2011-12-04	12:00
6238	0		1	Summer	2011-12-04	15:30
6243			0	Summer	2011-12-04	18:00
6257			0	Summer	2011-12-05	1:00
6265			0	Summer	2011-12-05	5:00
6272			0	Summer	2011-12-05	8:30
6283			0	Summer	2011-12-05	14:00
6284			0	Summer	2011-12-05	14:30
6285			0	Summer	2011-12-05	15:00
6306			0	Summer	2011-12-06	1:30
6307			0	Summer	2011-12-06	2:00
6310			0	Summer	2011-12-06	3:30
6318			0	Summer	2011-12-06	7:30
6320			0	Summer	2011-12-06	8:30
6323			0	Summer	2011-12-06	10:00
6325			0	Summer	2011-12-06	11:00
6354			0	Summer	2011-12-07	1:30
6356			0	Summer	2011-12-07	2:30
6368			0	Summer	2011-12-07	8:30
6370			0	Summer	2011-12-07	9:30
6381			0	Summer	2011-12-07	15:00
6385			0	Summer	2011-12-07	17:00
6399			0	Summer	2011-12-08	0:00
6410			0	Summer	2011-12-08	5:30
6415			0	Summer	2011-12-08	8:00
6421			0	Summer	2011-12-08	11:00
6426			0	Summer	2011-12-08	13:30
6455			0	Summer	2011-12-09	4:00
6475			0	Summer	2011-12-09	14:00
6477			0	Summer	2011-12-09	15:00
6481			0	Summer	2011-12-09	17:00
6487			0	Summer	2011-12-09	20:00
6497			0	Summer	2011-12-10	1:00
6519			0	Summer	2011-12-10	12:00
6535			0	Summer	2011-12-10	20:00
6544			0	Summer	2011-12-11	0:30
6551			0	Summer	2011-12-11	4:00
6554			0	Summer	2011-12-11	5:30
6566			0	Summer	2011-12-11	11:30
6574			0	Summer	2011-12-11	15:30
6590			0	Summer	2011-12-11	23:30
6593			0	Summer	2011-12-12	1:00
6595			0	Summer	2011-12-12	2:00
6621	0		3	Summer	2011-12-12	15:00
6624	0		1	Summer	2011-12-12	16:30
6646			0	Summer	2011-12-13	3:30
6662			0	Summer	2011-12-13	11:30
6676			0	Summer	2011-12-13	18:30
6699			0	Summer	2011-12-14	6:00
6706			0	Summer	2011-12-14	9:30
6707			0	Summer	2011-12-14	10:00
6714			0	Summer	2011-12-14	13:30
6716			0	Summer	2011-12-14	14:30
6721			0	Summer	2011-12-14	17:00
6726			0	Summer	2011-12-14	19:30
6736			0	Summer	2011-12-15	0:30
6747			0	Summer	2011-12-15	6:00
6748			0	Summer	2011-12-15	6:30
6758			0	Summer	2011-12-15	11:30
6760			0	Summer	2011-12-15	12:30
6779			0	Summer	2011-12-15	22:00
6780			0	Summer	2011-12-15	22:30
6787			0	Summer	2011-12-16	2:00
6808	0		1	Summer	2011-12-16	12:30
6823			0	Summer	2011-12-16	20:00
6824			0	Summer	2011-12-16	20:30
6826			0	Summer	2011-12-16	21:30
6836			0	Summer	2011-12-17	2:30
6855			0	Summer	2011-12-17	12:00
6868			0	Summer	2011-12-17	18:30
6873			0	Summer	2011-12-17	21:00
6892			0	Summer	2011-12-18	6:30
6893			0	Summer	2011-12-18	7:00
6898			0	Summer	2011-12-18	9:30
6905			0	Summer	2011-12-18	13:00
6913			0	Summer	2011-12-18	17:00
6914			0	Summer	2011-12-18	17:30
6929			0	Summer	2011-12-19	1:00
6941			0	Summer	2011-12-19	7:00
6950			0	Summer	2011-12-19	11:30
6956			0	Summer	2011-12-19	14:30
6977			0	Summer	2011-12-20	1:00
6982			0	Summer	2011-12-20	3:30
7009			0	Summer	2011-12-20	17:00
7020			0	Summer	2011-12-20	22:30
7026			0	Summer	2011-12-21	1:30
7041			0	Summer	2011-12-21	9:00
7042			0	Summer	2011-12-21	9:30
7053			0	Summer	2011-12-21	15:00
7056			0	Summer	2011-12-21	16:30
7061			0	Summer	2011-12-21	19:00
7064			0	Summer	2011-12-21	20:30
7066			0	Summer	2011-12-21	21:30
7067			0	Summer	2011-12-21	22:00
7094			0	Summer	2011-12-22	11:30
7106			0	Summer	2011-12-22	17:30
7118			0	Summer	2011-12-22	23:30
7124			0	Summer	2011-12-23	2:30
7131			0	Summer	2011-12-23	6:00
7132			0	Summer	2011-12-23	6:30
7149			0	Summer	2011-12-23	15:00
7150			0	Summer	2011-12-23	15:30
7151			0	Summer	2011-12-23	16:00
7157	0		1	Summer	2011-12-23	19:00
7163			0	Summer	2011-12-23	22:00
7203			0	Summer	2011-12-24	18:00
7209			0	Summer	2011-12-24	21:00
7222			0	Summer	2011-12-25	3:30
7252			0	Summer	2011-12-25	18:30
7253			0	Summer	2011-12-25	19:00
7263			0	Summer	2011-12-26	0:00
7273			0	Summer	2011-12-26	5:00
7284			0	Summer	2011-12-26	10:30
7336			0	Summer	2011-12-27	12:30
7362	0		1	Summer	2011-12-28	1:30
7373	0		2	Summer	2011-12-28	7:00
7378			0	Summer	2011-12-28	9:30
7380	0		3	Summer	2011-12-28	10:30
7383	0		1	Summer	2011-12-28	12:00
7389	0		1	Summer	2011-12-28	15:00
7408	0		1	Summer	2011-12-29	0:30
7409			0	Summer	2011-12-29	1:00
7425	0		3	Summer	2011-12-29	9:00
7446			0	Summer	2011-12-29	19:30
7447	0		1	Summer	2011-12-29	20:00
7448	0		3	Summer	2011-12-29	20:30
7451			0	Summer	2011-12-29	22:00
7464	0		1	Summer	2011-12-30	4:30
7475	0		1	Summer	2011-12-30	10:00
7480	0		5	Summer	2011-12-30	12:30
7501			0	Summer	2011-12-30	23:00
7507			0	Summer	2011-12-31	2:00
7509			0	Summer	2011-12-31	3:00
7515			0	Summer	2011-12-31	6:00
7519			0	Summer	2011-12-31	8:00
7523			0	Summer	2011-12-31	10:00
7524			0	Summer	2011-12-31	10:30
7536			0	Summer	2011-12-31	16:30
7542	0		1	Summer	2011-12-31	19:30
7557			0	Summer	2012-01-01	3:00
7564			0	Summer	2012-01-01	6:30
7566			0	Summer	2012-01-01	7:30
7581			0	Summer	2012-01-01	15:00
7583			0	Summer	2012-01-01	16:00
7612			0	Summer	2012-01-02	6:30
7620	0		1	Summer	2012-01-02	10:30
7621			0	Summer	2012-01-02	11:00
7636			0	Summer	2012-01-02	18:30
7638			0	Summer	2012-01-02	19:30
7644			0	Summer	2012-01-02	22:30
7656			0	Summer	2012-01-03	4:30
7686	0		3	Summer	2012-01-03	19:30
7692			0	Summer	2012-01-03	22:30
7699			0	Summer	2012-01-04	2:00
7701			0	Summer	2012-01-04	3:00
7706			0	Summer	2012-01-04	5:30
7714			0	Summer	2012-01-04	9:30
7717	0		2	Summer	2012-01-04	11:00
7732			0	Summer	2012-01-04	18:30
7735			0	Summer	2012-01-04	20:00
7738	0		1	Summer	2012-01-04	21:30
7748	0		2	Summer	2012-01-05	2:30
7752	0		1	Summer	2012-01-05	4:30
7753			0	Summer	2012-01-05	5:00
7772	0		1	Summer	2012-01-05	14:30
7788	0		1	Summer	2012-01-05	22:30
7803	0		2	Summer	2012-01-06	6:00
7810	0		1	Summer	2012-01-06	9:30
7821			0	Summer	2012-01-06	15:00
7824			0	Summer	2012-01-06	16:30
7829			0	Summer	2012-01-06	19:00
7853			0	Summer	2012-01-07	7:00
7857	0		1	Summer	2012-01-07	9:00
7863	0		4	Summer	2012-01-07	12:00
7864			0	Summer	2012-01-07	12:30
7874	0		1	Summer	2012-01-07	17:30
7887	0		1	Summer	2012-01-08	0:00
7893			0	Summer	2012-01-08	3:00
7906			0	Summer	2012-01-08	9:30
7918			0	Summer	2012-01-08	15:30
7941			0	Summer	2012-01-09	3:00
7942			0	Summer	2012-01-09	3:30
7949			0	Summer	2012-01-09	7:00
7956			0	Summer	2012-01-09	10:30
7983			0	Summer	2012-01-10	0:00
8002			0	Summer	2012-01-10	9:30
8007			0	Summer	2012-01-10	12:00
8010			0	Summer	2012-01-10	13:30
8025			0	Summer	2012-01-10	21:00
8035			0	Summer	2012-01-11	2:00
8036			0	Summer	2012-01-11	2:30
8038			0	Summer	2012-01-11	3:30
8043			0	Summer	2012-01-11	6:00
8044			0	Summer	2012-01-11	6:30
8047			0	Summer	2012-01-11	8:00
8051			0	Summer	2012-01-11	10:00
8065			0	Summer	2012-01-11	17:00
8076			0	Summer	2012-01-11	22:30
8078			0	Summer	2012-01-11	23:30
8086			0	Summer	2012-01-12	3:30
8097			0	Summer	2012-01-12	9:00
8104			0	Summer	2012-01-12	12:30
8112			0	Summer	2012-01-12	16:30
8123			0	Summer	2012-01-12	22:00
8159			0	Summer	2012-01-13	16:00
8163			0	Summer	2012-01-13	18:00
8173			0	Summer	2012-01-13	23:00
8174			0	Summer	2012-01-13	23:30
8196	0		1	Summer	2012-01-14	10:30
8199			0	Summer	2012-01-14	12:00
8201			0	Summer	2012-01-14	13:00
8231			0	Summer	2012-01-15	4:00
8247			0	Summer	2012-01-15	12:00
8259			0	Summer	2012-01-15	18:00
8270			0	Summer	2012-01-15	23:30
8280			0	Summer	2012-01-16	4:30
8290	0		1	Summer	2012-01-16	9:30
8293	0		1	Summer	2012-01-16	11:00
8305	0		3	Summer	2012-01-16	17:00
8306	0		1	Summer	2012-01-16	17:30
8325			0	Summer	2012-01-17	3:00
8353	0		1	Summer	2012-01-17	17:00
8354	0		1	Summer	2012-01-17	17:30
8359			0	Summer	2012-01-17	20:00
8361			0	Summer	2012-01-17	21:00
8362	0		1	Summer	2012-01-17	21:30
8370	0		1	Summer	2012-01-18	1:30
8376			0	Summer	2012-01-18	4:30
8377			0	Summer	2012-01-18	5:00
8394	0		2	Summer	2012-01-18	13:30
8403			0	Summer	2012-01-18	18:00
8407			0	Summer	2012-01-18	20:00
8425			0	Summer	2012-01-19	5:00
8445			0	Summer	2012-01-19	15:00
8456			0	Summer	2012-01-19	20:30
8464	0		1	Summer	2012-01-20	0:30
8481			0	Summer	2012-01-20	9:00
8492			0	Summer	2012-01-20	14:30
8497	0		1	Summer	2012-01-20	17:00
8516			0	Summer	2012-01-21	2:30
8517			0	Summer	2012-01-21	3:00
8526	0		1	Summer	2012-01-21	7:30
8532			0	Summer	2012-01-21	10:30
8535			0	Summer	2012-01-21	12:00
8539	0		2	Summer	2012-01-21	14:00
8562			0	Summer	2012-01-22	1:30
8567			0	Summer	2012-01-22	4:00
8588			0	Summer	2012-01-22	14:30
8596			0	Summer	2012-01-22	18:30
8597			0	Summer	2012-01-22	19:00
8633			0	Summer	2012-01-23	13:00
8637	0		1	Summer	2012-01-23	15:00
8644			0	Summer	2012-01-23	18:30
8658			0	Summer	2012-01-24	1:30
8665			0	Summer	2012-01-24	5:00
8685			0	Summer	2012-01-24	15:00
8700	0		2	Summer	2012-01-24	22:30
8701			0	Summer	2012-01-24	23:00
8703	0		2	Summer	2012-01-25	0:00
8726			0	Summer	2012-01-25	11:30
8749			0	Summer	2012-01-25	23:00
8760	0		2	Summer	2012-01-26	4:30
8761	0		1	Summer	2012-01-26	5:00
8764	0		1	Summer	2012-01-26	6:30
8771			0	Summer	2012-01-26	10:00
8773	0		1	Summer	2012-01-26	11:00
8786			0	Summer	2012-01-26	17:30
8810			0	Summer	2012-01-27	5:30
8818			0	Summer	2012-01-27	9:30
8821			0	Summer	2012-01-27	11:00
8823	0		1	Summer	2012-01-27	12:00
8834			0	Summer	2012-01-27	17:30
8835	0		1	Summer	2012-01-27	18:00
8843			0	Summer	2012-01-27	22:00
8854	0		1	Summer	2012-01-28	3:30
8857			0	Summer	2012-01-28	5:00
8871			0	Summer	2012-01-28	12:00
8874			0	Summer	2012-01-28	13:30
8879			0	Summer	2012-01-28	16:00
8883			0	Summer	2012-01-28	18:00
8886	0		2	Summer	2012-01-28	19:30
8890	0		1	Summer	2012-01-28	21:30
8900			0	Summer	2012-01-29	2:30
8932	0		1	Summer	2012-01-29	18:30
8933			0	Summer	2012-01-29	19:00
8951			0	Summer	2012-01-30	4:00
8960			0	Summer	2012-01-30	8:30
8978	0		1	Summer	2012-01-30	17:30
8985			0	Summer	2012-01-30	21:00
8990			0	Summer	2012-01-30	23:30
9003			0	Summer	2012-01-31	6:00
9014			0	Summer	2012-01-31	11:30
9034			0	Summer	2012-01-31	21:30
9051			0	Summer	2012-02-01	6:00
9061			0	Summer	2012-02-01	11:00
9089			0	Summer	2012-02-02	1:00
9096			0	Summer	2012-02-02	4:30
9108			0	Summer	2012-02-02	10:30
9115			0	Summer	2012-02-02	14:00
9140			0	Summer	2012-02-03	2:30
9143			0	Summer	2012-02-03	4:00
9151			0	Summer	2012-02-03	8:00
9156			0	Summer	2012-02-03	10:30
9164			0	Summer	2012-02-03	14:30
9166			0	Summer	2012-02-03	15:30
9189			0	Summer	2012-02-04	3:00
9195			0	Summer	2012-02-04	6:00
9210			0	Summer	2012-02-04	13:30
9236			0	Summer	2012-02-05	2:30
9237			0	Summer	2012-02-05	3:00
9250			0	Summer	2012-02-05	9:30
9252			0	Summer	2012-02-05	10:30
9258			0	Summer	2012-02-05	13:30
9264			0	Summer	2012-02-05	16:30
9283			0	Summer	2012-02-06	2:00
9286			0	Summer	2012-02-06	3:30
9290			0	Summer	2012-02-06	5:30
9318			0	Summer	2012-02-06	19:30
9324			0	Summer	2012-02-06	22:30
9325			0	Summer	2012-02-06	23:00
9339			0	Summer	2012-02-07	6:00
9356			0	Summer	2012-02-07	14:30
9368			0	Summer	2012-02-07	20:30
9375			0	Summer	2012-02-08	0:00
9386			0	Summer	2012-02-08	5:30
9388			0	Summer	2012-02-08	6:30
9390			0	Summer	2012-02-08	7:30
9414			0	Summer	2012-02-08	19:30
9419			0	Summer	2012-02-08	22:00
9441			0	Summer	2012-02-09	9:00
9442			0	Summer	2012-02-09	9:30
9447			0	Summer	2012-02-09	12:00
9459	0		1	Summer	2012-02-09	18:00
9494			0	Summer	2012-02-10	11:30
9507			0	Summer	2012-02-10	18:00
9516			0	Summer	2012-02-10	22:30
9519			0	Summer	2012-02-11	0:00
9526			0	Summer	2012-02-11	3:30
9527			0	Summer	2012-02-11	4:00
9541			0	Summer	2012-02-11	11:00
9547			0	Summer	2012-02-11	14:00
9549			0	Summer	2012-02-11	15:00
9557			0	Summer	2012-02-11	19:00
9562			0	Summer	2012-02-11	21:30
9565			0	Summer	2012-02-11	23:00
9580			0	Summer	2012-02-12	6:30
9581			0	Summer	2012-02-12	7:00
9583			0	Summer	2012-02-12	8:00
9589			0	Summer	2012-02-12	11:00
9591			0	Summer	2012-02-12	12:00
9594			0	Summer	2012-02-12	13:30
9632			0	Summer	2012-02-13	8:30
9638			0	Summer	2012-02-13	11:30
9648			0	Summer	2012-02-13	16:30
9649	0		1	Summer	2012-02-13	17:00
9674			0	Summer	2012-02-14	5:30
9680			0	Summer	2012-02-14	8:30
9693			0	Summer	2012-02-14	15:00
9713			0	Summer	2012-02-15	1:00
9735			0	Summer	2012-02-15	12:00
9746			0	Summer	2012-02-15	17:30
9767			0	Summer	2012-02-16	4:00
9797			0	Summer	2012-02-16	19:00
9810	0		1	Summer	2012-02-17	1:30
9837			0	Summer	2012-02-17	15:00
9855			0	Summer	2012-02-18	0:00
9859			0	Summer	2012-02-18	2:00
9868			0	Summer	2012-02-18	6:30
9869			0	Summer	2012-02-18	7:00
9875			0	Summer	2012-02-18	10:00
9884			0	Summer	2012-02-18	14:30
9886			0	Summer	2012-02-18	15:30
9888			0	Summer	2012-02-18	16:30
9893			0	Summer	2012-02-18	19:00
9898			0	Summer	2012-02-18	21:30
9910			0	Summer	2012-02-19	3:30
9915			0	Summer	2012-02-19	6:00
9918			0	Summer	2012-02-19	7:30
9922			0	Summer	2012-02-19	9:30
9932			0	Summer	2012-02-19	14:30
9940			0	Summer	2012-02-19	18:30
9943			0	Summer	2012-02-19	20:00
9948			0	Summer	2012-02-19	22:30
9964			0	Summer	2012-02-20	6:30
9976			0	Summer	2012-02-20	12:30
9978			0	Summer	2012-02-20	13:30
10000			0	Summer	2012-02-21	0:30
10004			0	Summer	2012-02-21	2:30
10024			0	Summer	2012-02-21	12:30
10045			0	Summer	2012-02-21	23:00
10062			0	Summer	2012-02-22	7:30
10074			0	Summer	2012-02-22	13:30
10079			0	Summer	2012-02-22	16:00
10081			0	Summer	2012-02-22	17:00
10082			0	Summer	2012-02-22	17:30
10083			0	Summer	2012-02-22	18:00
10092			0	Summer	2012-02-22	22:30
10093			0	Summer	2012-02-22	23:00
10099			0	Summer	2012-02-23	2:00
10110			0	Summer	2012-02-23	7:30
10168			0	Summer	2012-02-24	12:30
10169			0	Summer	2012-02-24	13:00
10170			0	Summer	2012-02-24	13:30
10198			0	Summer	2012-02-25	3:30
10217			0	Summer	2012-02-25	13:00
10219			0	Summer	2012-02-25	14:00
10227			0	Summer	2012-02-25	18:00
10230			0	Summer	2012-02-25	19:30
10247			0	Summer	2012-02-26	4:00
10256			0	Summer	2012-02-26	8:30
10260			0	Summer	2012-02-26	10:30
10265			0	Summer	2012-02-26	13:00
10278			0	Summer	2012-02-26	19:30
10279			0	Summer	2012-02-26	20:00
10280			0	Summer	2012-02-26	20:30
10288			0	Summer	2012-02-27	0:30
10297			0	Summer	2012-02-27	5:00
10313			0	Summer	2012-02-27	13:00
10316			0	Summer	2012-02-27	14:30
10317			0	Summer	2012-02-27	15:00
10323			0	Summer	2012-02-27	18:00
10341			0	Summer	2012-02-28	3:00
10353			0	Summer	2012-02-28	9:00
10360			0	Summer	2012-02-28	12:30
10361			0	Summer	2012-02-28	13:00
10362			0	Summer	2012-02-28	13:30
10374			0	Summer	2012-02-28	19:30
10382			0	Summer	2012-02-28	23:30
10388			0	Summer	2012-02-29	2:30
10400			0	Summer	2012-02-29	8:30
10411			0	Summer	2012-02-29	14:00
10412			0	Summer	2012-02-29	14:30
10432			0	Autumn	2012-03-02	0:30
10434			0	Autumn	2012-03-02	1:30
10437	0		2	Autumn	2012-03-02	3:00
10449	0		4	Autumn	2012-03-02	9:00
10452	0		1	Autumn	2012-03-02	10:30
10455			0	Autumn	2012-03-02	12:00
10457			0	Autumn	2012-03-02	13:00
10484			0	Autumn	2012-03-03	2:30
10486			0	Autumn	2012-03-03	3:30
10504			0	Autumn	2012-03-03	12:30
10506			0	Autumn	2012-03-03	13:30
10508			0	Autumn	2012-03-03	14:30
10514			0	Autumn	2012-03-03	17:30
10525			0	Autumn	2012-03-03	23:00
10536			0	Autumn	2012-03-04	4:30
10537			0	Autumn	2012-03-04	5:00
10541			0	Autumn	2012-03-04	7:00
10572			0	Autumn	2012-03-04	22:30
10599			0	Autumn	2012-03-05	12:00
10604			0	Autumn	2012-03-05	14:30
10606			0	Autumn	2012-03-05	15:30
10611			0	Autumn	2012-03-05	18:00
10629			0	Autumn	2012-03-06	3:00
10635			0	Autumn	2012-03-06	6:00
10669			0	Autumn	2012-03-06	23:00
10686			0	Autumn	2012-03-07	7:30
10728			0	Autumn	2012-03-08	4:30
10759			0	Autumn	2012-03-08	20:00
10766			0	Autumn	2012-03-08	23:30
10767			0	Autumn	2012-03-09	0:00
10774			0	Autumn	2012-03-09	3:30
10790			0	Autumn	2012-03-09	11:30
10791			0	Autumn	2012-03-09	12:00
10793			0	Autumn	2012-03-09	13:00
10796			0	Autumn	2012-03-09	14:30
10800			0	Autumn	2012-03-09	16:30
10809			0	Autumn	2012-03-09	21:00
10822			0	Autumn	2012-03-10	3:30
10842			0	Autumn	2012-03-10	13:30
10844			0	Autumn	2012-03-10	14:30
10845			0	Autumn	2012-03-10	15:00
10865			0	Autumn	2012-03-11	1:00
10878			0	Autumn	2012-03-11	7:30
10899			0	Autumn	2012-03-11	18:00
10904			0	Autumn	2012-03-11	20:30
10916			0	Autumn	2012-03-12	2:30
10925			0	Autumn	2012-03-12	7:00
10926			0	Autumn	2012-03-12	7:30
10941			0	Autumn	2012-03-12	15:00
10947			0	Autumn	2012-03-12	18:00
10954			0	Autumn	2012-03-12	21:30
10962			0	Autumn	2012-03-13	1:30
10964			0	Autumn	2012-03-13	2:30
10968			0	Autumn	2012-03-13	4:30
10972			0	Autumn	2012-03-13	6:30
10993			0	Autumn	2012-03-13	17:00
11003			0	Autumn	2012-03-13	22:00
11010			0	Autumn	2012-03-14	1:30
11021			0	Autumn	2012-03-14	7:00
11041			0	Autumn	2012-03-14	17:00
11044			0	Autumn	2012-03-14	18:30
11047			0	Autumn	2012-03-14	20:00
11050			0	Autumn	2012-03-14	21:30
11067			0	Autumn	2012-03-15	6:00
11068			0	Autumn	2012-03-15	6:30
11080			0	Autumn	2012-03-15	12:30
11097			0	Autumn	2012-03-15	21:00
11111			0	Autumn	2012-03-16	4:00
11115			0	Autumn	2012-03-16	6:00
11139			0	Autumn	2012-03-16	18:00
11143			0	Autumn	2012-03-16	20:00
11145			0	Autumn	2012-03-16	21:00
11157			0	Autumn	2012-03-17	3:00
11163			0	Autumn	2012-03-17	6:00
11165			0	Autumn	2012-03-17	7:00
11167			0	Autumn	2012-03-17	8:00
11178			0	Autumn	2012-03-17	13:30
11193			0	Autumn	2012-03-17	21:00
11213			0	Autumn	2012-03-18	7:00
11221			0	Autumn	2012-03-18	11:00
11257			0	Autumn	2012-03-19	5:00
11266			0	Autumn	2012-03-19	9:30
11269			0	Autumn	2012-03-19	11:00
11279			0	Autumn	2012-03-19	16:00
11280			0	Autumn	2012-03-19	16:30
11286			0	Autumn	2012-03-19	19:30
11294			0	Autumn	2012-03-19	23:30
11295			0	Autumn	2012-03-20	0:00
11303			0	Autumn	2012-03-20	4:00
11316			0	Autumn	2012-03-20	10:30
11318			0	Autumn	2012-03-20	11:30
11326			0	Autumn	2012-03-20	15:30
11345			0	Autumn	2012-03-21	1:00
11359			0	Autumn	2012-03-21	8:00
11366	0		1	Autumn	2012-03-21	11:30
11373	0		1	Autumn	2012-03-21	15:00
11375			0	Autumn	2012-03-21	16:00
11382			0	Autumn	2012-03-21	19:30
11416			0	Autumn	2012-03-22	12:30
11421			0	Autumn	2012-03-22	15:00
11437			0	Autumn	2012-03-22	23:00
11446			0	Autumn	2012-03-23	3:30
11458			0	Autumn	2012-03-23	9:30
11460			0	Autumn	2012-03-23	10:30
11464			0	Autumn	2012-03-23	12:30
11478			0	Autumn	2012-03-23	19:30
11503			0	Autumn	2012-03-24	8:00
11518			0	Autumn	2012-03-24	15:30
11523			0	Autumn	2012-03-24	18:00
11531			0	Autumn	2012-03-24	22:00
11540			0	Autumn	2012-03-25	2:30
11566			0	Autumn	2012-03-25	15:30
11578			0	Autumn	2012-03-25	21:30
11616			0	Autumn	2012-03-26	16:30
11637			0	Autumn	2012-03-27	3:00
11639			0	Autumn	2012-03-27	4:00
11657			0	Autumn	2012-03-27	13:00
11668			0	Autumn	2012-03-27	18:30
11676			0	Autumn	2012-03-27	22:30
11681			0	Autumn	2012-03-28	1:00
11703			0	Autumn	2012-03-28	12:00
11709			0	Autumn	2012-03-28	15:00
11713			0	Autumn	2012-03-28	17:00
11719			0	Autumn	2012-03-28	20:00
11725			0	Autumn	2012-03-28	23:00
11746			0	Autumn	2012-03-29	9:30
11766			0	Autumn	2012-03-29	19:30
11770			0	Autumn	2012-03-29	21:30
11784			0	Autumn	2012-03-30	4:30
11791			0	Autumn	2012-03-30	8:00
11792			0	Autumn	2012-03-30	8:30
11824			0	Autumn	2012-03-31	0:30
11845			0	Autumn	2012-03-31	11:00
11865			0	Autumn	2012-03-31	21:00
11901			0	Autumn	2012-04-01	15:00
11917			0	Autumn	2012-04-01	23:00
11920			0	Autumn	2012-04-02	0:30
11932			0	Autumn	2012-04-02	6:30
11935			0	Autumn	2012-04-02	8:00
11942			0	Autumn	2012-04-02	11:30
11948			0	Autumn	2012-04-02	14:30
11961			0	Autumn	2012-04-02	21:00
11971			0	Autumn	2012-04-03	2:00
11986			0	Autumn	2012-04-03	9:30
12001			0	Autumn	2012-04-03	17:00
12006			0	Autumn	2012-04-03	19:30
12015			0	Autumn	2012-04-04	0:00
12019			0	Autumn	2012-04-04	2:00
12022			0	Autumn	2012-04-04	3:30
12026			0	Autumn	2012-04-04	5:30
12036			0	Autumn	2012-04-04	10:30
12045			0	Autumn	2012-04-04	15:00
12052			0	Autumn	2012-04-04	18:30
12055			0	Autumn	2012-04-04	20:00
12056			0	Autumn	2012-04-04	20:30
12078			0	Autumn	2012-04-05	7:30
12086			0	Autumn	2012-04-05	11:30
12094			0	Autumn	2012-04-05	15:30
12101			0	Autumn	2012-04-05	19:00
12120			0	Autumn	2012-04-06	4:30
12134			0	Autumn	2012-04-06	11:30
12142			0	Autumn	2012-04-06	15:30
12158			0	Autumn	2012-04-06	23:30
12170			0	Autumn	2012-04-07	5:30
12179			0	Autumn	2012-04-07	10:00
12185			0	Autumn	2012-04-07	13:00
12187			0	Autumn	2012-04-07	14:00
12191			0	Autumn	2012-04-07	16:00
12199			0	Autumn	2012-04-07	20:00
12200			0	Autumn	2012-04-07	20:30
12217			0	Autumn	2012-04-08	5:00
12227			0	Autumn	2012-04-08	10:00
12243			0	Autumn	2012-04-08	18:00
12247			0	Autumn	2012-04-08	20:00
12299			0	Autumn	2012-04-09	22:00
12302			0	Autumn	2012-04-09	23:30
12339			0	Autumn	2012-04-10	18:00
12340			0	Autumn	2012-04-10	18:30
12343			0	Autumn	2012-04-10	20:00
12349			0	Autumn	2012-04-10	23:00
12356			0	Autumn	2012-04-11	2:30
12360			0	Autumn	2012-04-11	4:30
12363			0	Autumn	2012-04-11	6:00
12366			0	Autumn	2012-04-11	7:30
12376			0	Autumn	2012-04-11	12:30
12381			0	Autumn	2012-04-11	15:00
12403			0	Autumn	2012-04-12	2:00
12416			0	Autumn	2012-04-12	8:30
12425			0	Autumn	2012-04-12	13:00
12432			0	Autumn	2012-04-12	16:30
12433			0	Autumn	2012-04-12	17:00
12448			0	Autumn	2012-04-13	0:30
12464			0	Autumn	2012-04-13	8:30
12466			0	Autumn	2012-04-13	9:30
12474			0	Autumn	2012-04-13	13:30
12485			0	Autumn	2012-04-13	19:00
12487			0	Autumn	2012-04-13	20:00
12488			0	Autumn	2012-04-13	20:30
12505			0	Autumn	2012-04-14	5:00
12521			0	Autumn	2012-04-14	13:00
12525			0	Autumn	2012-04-14	15:00
12553			0	Autumn	2012-04-15	5:00
12590			0	Autumn	2012-04-15	23:30
12593			0	Autumn	2012-04-16	1:00
12602			0	Autumn	2012-04-16	5:30
12608			0	Autumn	2012-04-16	8:30
12610			0	Autumn	2012-04-16	9:30
12623			0	Autumn	2012-04-16	16:00
12624			0	Autumn	2012-04-16	16:30
12625			0	Autumn	2012-04-16	17:00
12630			0	Autumn	2012-04-16	19:30
12635			0	Autumn	2012-04-16	22:00
12638			0	Autumn	2012-04-16	23:30
12641			0	Autumn	2012-04-17	1:00
12642			0	Autumn	2012-04-17	1:30
12646			0	Autumn	2012-04-17	3:30
12656			0	Autumn	2012-04-17	8:30
12666			0	Autumn	2012-04-17	13:30
12668			0	Autumn	2012-04-17	14:30
12682			0	Autumn	2012-04-17	21:30
12687			0	Autumn	2012-04-18	0:00
12692			0	Autumn	2012-04-18	2:30
12693			0	Autumn	2012-04-18	3:00
12694			0	Autumn	2012-04-18	3:30
12705			0	Autumn	2012-04-18	9:00
12708			0	Autumn	2012-04-18	10:30
12714			0	Autumn	2012-04-18	13:30
12722			0	Autumn	2012-04-18	17:30
12732			0	Autumn	2012-04-18	22:30
12737			0	Autumn	2012-04-19	1:00
12746			0	Autumn	2012-04-19	5:30
12764			0	Autumn	2012-04-19	14:30
12782			0	Autumn	2012-04-19	23:30
12828			0	Autumn	2012-04-20	22:30
12837			0	Autumn	2012-04-21	3:00
12845			0	Autumn	2012-04-21	7:00
12846			0	Autumn	2012-04-21	7:30
12858			0	Autumn	2012-04-21	13:30
12860			0	Autumn	2012-04-21	14:30
12874			0	Autumn	2012-04-21	21:30
12884			0	Autumn	2012-04-22	2:30
12906			0	Autumn	2012-04-22	13:30
12907			0	Autumn	2012-04-22	14:00
12912			0	Autumn	2012-04-22	16:30
12916			0	Autumn	2012-04-22	18:30
12922			0	Autumn	2012-04-22	21:30
12964			0	Autumn	2012-04-23	18:30
12976			0	Autumn	2012-04-24	0:30
13005			0	Autumn	2012-04-24	15:00
13013			0	Autumn	2012-04-24	19:00
13023			0	Autumn	2012-04-25	0:00
13027			0	Autumn	2012-04-25	2:00
13063			0	Autumn	2012-04-25	20:00
13084			0	Autumn	2012-04-26	6:30
13093			0	Autumn	2012-04-26	11:00
13100			0	Autumn	2012-04-26	14:30
13125			0	Autumn	2012-04-27	3:00
13129			0	Autumn	2012-04-27	5:00
13130			0	Autumn	2012-04-27	5:30
13146			0	Autumn	2012-04-27	13:30
13149			0	Autumn	2012-04-27	15:00
13150			0	Autumn	2012-04-27	15:30
13168			0	Autumn	2012-04-28	0:30
13172			0	Autumn	2012-04-28	2:30
13182			0	Autumn	2012-04-28	7:30
13197			0	Autumn	2012-04-28	15:00
13205			0	Autumn	2012-04-28	19:00
13216			0	Autumn	2012-04-29	0:30
13228			0	Autumn	2012-04-29	6:30
13244			0	Autumn	2012-04-29	14:30
13245			0	Autumn	2012-04-29	15:00
13246			0	Autumn	2012-04-29	15:30
13251			0	Autumn	2012-04-29	18:00
13253			0	Autumn	2012-04-29	19:00
13263			0	Autumn	2012-04-30	0:00
13305			0	Autumn	2012-04-30	21:00
13308			0	Autumn	2012-04-30	22:30
13311			0	Autumn	2012-05-01	0:00
13325			0	Autumn	2012-05-01	7:00
13337	0		1	Autumn	2012-05-01	13:00
13340			0	Autumn	2012-05-01	14:30
13346			0	Autumn	2012-05-01	17:30
13357			0	Autumn	2012-05-01	23:00
13383			0	Autumn	2012-05-02	12:00
13400			0	Autumn	2012-05-02	20:30
13417			0	Autumn	2012-05-03	5:00
13430			0	Autumn	2012-05-03	11:30
13437	0		1	Autumn	2012-05-03	15:00
13438			0	Autumn	2012-05-03	15:30
13448			0	Autumn	2012-05-03	20:30
13462			0	Autumn	2012-05-04	3:30
13467			0	Autumn	2012-05-04	6:00
13481			0	Autumn	2012-05-04	13:00
13482			0	Autumn	2012-05-04	13:30
13493			0	Autumn	2012-05-04	19:00
13503	100	33.3333	2	Autumn	2012-05-05	0:00
13510		0	2	Autumn	2012-05-05	3:30
13513		0	1	Autumn	2012-05-05	5:00
13516			0	Autumn	2012-05-05	6:30
13525			0	Autumn	2012-05-05	11:00
13537			0	Autumn	2012-05-05	17:00
13553			0	Autumn	2012-05-06	1:00
13566			0	Autumn	2012-05-06	7:30
13612			0	Autumn	2012-05-07	6:30
13624			0	Autumn	2012-05-07	12:30
13634			0	Autumn	2012-05-07	17:30
13640			0	Autumn	2012-05-07	20:30
13648			0	Autumn	2012-05-08	0:30
13660			0	Autumn	2012-05-08	6:30
13682			0	Autumn	2012-05-08	17:30
13696			0	Autumn	2012-05-09	0:30
13714			0	Autumn	2012-05-09	9:30
13723			0	Autumn	2012-05-09	14:00
13728			0	Autumn	2012-05-09	16:30
13734			0	Autumn	2012-05-09	19:30
13740			0	Autumn	2012-05-09	22:30
13741			0	Autumn	2012-05-09	23:00
13778			0	Autumn	2012-05-10	17:30
13779	100	100	0	Autumn	2012-05-10	18:00
13796			0	Autumn	2012-05-11	2:30
13797			0	Autumn	2012-05-11	3:00
13845			0	Autumn	2012-05-12	3:00
13851			0	Autumn	2012-05-12	6:00
13858			0	Autumn	2012-05-12	9:30
13868			0	Autumn	2012-05-12	14:30
13877			0	Autumn	2012-05-12	19:00
13883			0	Autumn	2012-05-12	22:00
13885			0	Autumn	2012-05-12	23:00
13887			0	Autumn	2012-05-13	0:00
13888		0	1	Autumn	2012-05-13	0:30
13889			0	Autumn	2012-05-13	1:00
13894	0		3	Autumn	2012-05-13	3:30
13898			0	Autumn	2012-05-13	5:30
13904			0	Autumn	2012-05-13	8:30
13917			0	Autumn	2012-05-13	15:00
13925			0	Autumn	2012-05-13	19:00
13927			0	Autumn	2012-05-13	20:00
13932			0	Autumn	2012-05-13	22:30
13938			0	Autumn	2012-05-14	1:30
13946			0	Autumn	2012-05-14	5:30
13961			0	Autumn	2012-05-14	13:00
13971			0	Autumn	2012-05-14	18:00
13974	25	100	3	Autumn	2012-05-14	19:30
13977		0	1	Autumn	2012-05-14	21:00
13978	0		2	Autumn	2012-05-14	21:30
13981			0	Autumn	2012-05-14	23:00
13988			0	Autumn	2012-05-15	2:30
13989			0	Autumn	2012-05-15	3:00
14001			0	Autumn	2012-05-15	9:00
14017	100	71.4286	2	Autumn	2012-05-15	17:00
14018			0	Autumn	2012-05-15	17:30
14020	66.6667	50	1	Autumn	2012-05-15	18:30
14025	50	100	1	Autumn	2012-05-15	21:00
14031			0	Autumn	2012-05-16	0:00
14042			0	Autumn	2012-05-16	5:30
14043			0	Autumn	2012-05-16	6:00
14045	100	100	0	Autumn	2012-05-16	7:00
14055	100	100	0	Autumn	2012-05-16	12:00
14057	0		1	Autumn	2012-05-16	13:00
14063			0	Autumn	2012-05-16	16:00
14064			0	Autumn	2012-05-16	16:30
14101		0	1	Autumn	2012-05-17	11:00
14117			0	Autumn	2012-05-17	19:00
14126			0	Autumn	2012-05-17	23:30
14156			0	Autumn	2012-05-18	14:30
14169	100	66.6667	1	Autumn	2012-05-18	21:00
14189			0	Autumn	2012-05-19	7:00
14199	100	100	0	Autumn	2012-05-19	12:00
14208			0	Autumn	2012-05-19	16:30
14211	100	100	0	Autumn	2012-05-19	18:00
14212	75	100	1	Autumn	2012-05-19	18:30
14241	100	100	0	Autumn	2012-05-20	9:00
14248	86.6667	81.25	1	Autumn	2012-05-20	12:30
14263			0	Autumn	2012-05-20	20:00
14264	0		1	Autumn	2012-05-20	20:30
14266	0		2	Autumn	2012-05-20	21:30
14271	80	100	2	Autumn	2012-05-21	0:00
14278			0	Autumn	2012-05-21	3:30
14279	100	75	1	Autumn	2012-05-21	4:00
14282			0	Autumn	2012-05-21	5:30
14284	100	100	0	Autumn	2012-05-21	6:30
14303	100	100	0	Autumn	2012-05-21	16:00
14310	87.5	63.6364	4	Autumn	2012-05-21	19:30
14318	100	75	1	Autumn	2012-05-21	23:30
14323	62.5	62.5	0	Autumn	2012-05-22	2:00
14325	100	100	0	Autumn	2012-05-22	3:00
14332	0		2	Autumn	2012-05-22	6:30
14335	100	100	0	Autumn	2012-05-22	8:00
14345	100	50	1	Autumn	2012-05-22	13:00
14347	100	100	0	Autumn	2012-05-22	14:00
14362			0	Autumn	2012-05-22	21:30
14367	100	100	0	Autumn	2012-05-23	0:00
14376	91.3043	84	2	Autumn	2012-05-23	4:30
14405	70	77.7778	1	Autumn	2012-05-23	19:00
14406	73.3333	68.75	1	Autumn	2012-05-23	19:30
14408	50	66.6667	1	Autumn	2012-05-23	20:30
14425	75	100	1	Autumn	2012-05-24	5:00
14432	0		2	Autumn	2012-05-24	8:30

## Sheet: All data
LineNumber	NoOfCalls	CallsPerHr	MeanCallsFor24hPeriod	MeanAdjustedCallRate	Upcall	UpcallsPerHr	Detected upcalls	Season	Date	Month	Time	NauticalTwilightTimes	DielPeriod
30	1	24	40.8333	-16.8333	0	0	0	Winter	2011-07-23	July	03:30		Night
33	2	48	40.8333	7.16667	0	0	0	Winter	2011-07-23	July	05:00		Night
37	8	192	40.8333	151.167	0	0	0	Winter	2011-07-23	July	07:00		Night
38	19	456	40.8333	415.167	0	0	0	Winter	2011-07-23	July	07:30	7:24 begin	Dawn
42	3	72	40.8333	31.1667	0	0	0	Winter	2011-07-23	July	09:30		Morning
46	3	72	40.8333	31.1667	0	0	0	Winter	2011-07-23	July	11:30		Morning
52	8	192	40.8333	151.167	0	0	0	Winter	2011-07-23	July	14:30		Afternoon
79	0	0	58.3333	-58.3333	0	0	0	Winter	2011-07-24	July	04:00		Night
89	3	72	58.3333	13.6667	0	0	0	Winter	2011-07-24	July	09:00		Morning
131	5	120	43	77	0	0	0	Winter	2011-07-25	July	06:00		Night
132	4	96	43	53	0	0	0	Winter	2011-07-25	July	06:30		Night
214	3	72	10.6667	61.3333	0	0	0	Winter	2011-07-26	July	23:30		Night
225	0	0	15.6667	-15.6667	0	0	0	Winter	2011-07-27	July	05:00		Night
227	0	0	15.6667	-15.6667	0	0	0	Winter	2011-07-27	July	06:00		Night
236	0	0	15.6667	-15.6667	0	0	0	Winter	2011-07-27	July	10:30		Morning
238	1	24	15.6667	8.33333	0	0	0	Winter	2011-07-27	July	11:30		Morning
279	1	24	29.6667	-5.66667	0	0	0	Winter	2011-07-28	July	08:00		Dawn
281	1	24	29.6667	-5.66667	0	0	0	Winter	2011-07-28	July	09:00		Morning
282	1	24	29.6667	-5.66667	0	0	0	Winter	2011-07-28	July	09:30		Morning
284	0	0	29.6667	-29.6667	0	0	0	Winter	2011-07-28	July	10:30		Morning
286	0	0	29.6667	-29.6667	0	0	0	Winter	2011-07-28	July	11:30		Morning
287	0	0	29.6667	-29.6667	0	0	0	Winter	2011-07-28	July	12:00		Morning
289	18	432	29.6667	402.333	0	0	0	Winter	2011-07-28	July	13:00	13:01 transit	Afternoon
333	2	48	11.6667	36.3333	0	0	0	Winter	2011-07-29	July	11:00		Morning
336	0	0	11.6667	-11.6667	0	0	0	Winter	2011-07-29	July	12:30		Morning
337	2	48	11.6667	36.3333	0	0	0	Winter	2011-07-29	July	13:00	13:01 transit	Afternoon
352	5	120	11.6667	108.333	0	0	0	Winter	2011-07-29	July	20:30		Night
353	0	0	11.6667	-11.6667	0	0	0	Winter	2011-07-29	July	21:00		Night
355	0	0	11.6667	-11.6667	0	0	0	Winter	2011-07-29	July	22:00		Night
356	3	72	11.6667	60.3333	0	0	0	Winter	2011-07-29	July	22:30		Night
357	0	0	11.6667	-11.6667	0	0	0	Winter	2011-07-29	July	23:00		Night
361	2	48	16	32	0	0	0	Winter	2011-07-30	July	01:00		Night
366	0	0	16	-16	0	0	0	Winter	2011-07-30	July	03:30		Night
371	0	0	16	-16	0	0	0	Winter	2011-07-30	July	06:00		Night
373	3	72	16	56	0	0	0	Winter	2011-07-30	July	07:00		Night
388	5	120	16	104	0	0	0	Winter	2011-07-30	July	14:30		Afternoon
390	4	96	16	80	0	0	0	Winter	2011-07-30	July	15:30		Afternoon
392	0	0	16	-16	0	0	0	Winter	2011-07-30	July	16:30		Afternoon
395	0	0	16	-16	0	0	0	Winter	2011-07-30	July	18:00		Dusk
398	1	24	16	8	0	0	0	Winter	2011-07-30	July	19:30		Night
401	0	0	16	-16	0	0	0	Winter	2011-07-30	July	21:00		Night
406	1	24	16	8	0	0	0	Winter	2011-07-30	July	23:30		Night
409	0	0	11.6667	-11.6667	0	0	0	Winter	2011-07-31	July	01:00		Night
410	0	0	11.6667	-11.6667	0	0	0	Winter	2011-07-31	July	01:30		Night
411	0	0	11.6667	-11.6667	0	0	0	Winter	2011-07-31	July	02:00		Night
412	0	0	11.6667	-11.6667	0	0	0	Winter	2011-07-31	July	02:30		Night
413	0	0	11.6667	-11.6667	0	0	0	Winter	2011-07-31	July	03:00		Night
416	0	0	11.6667	-11.6667	0	0	0	Winter	2011-07-31	July	04:30		Night
417	0	0	11.6667	-11.6667	0	0	0	Winter	2011-07-31	July	05:00		Night
424	0	0	11.6667	-11.6667	0	0	0	Winter	2011-07-31	July	08:30	8:31 rise	Dawn
425	1	24	11.6667	12.3333	0	0	0	Winter	2011-07-31	July	09:00		Morning
426	0	0	11.6667	-11.6667	0	0	0	Winter	2011-07-31	July	09:30		Morning
430	0	0	11.6667	-11.6667	0	0	0	Winter	2011-07-31	July	11:30		Morning
431	1	24	11.6667	12.3333	0	0	0	Winter	2011-07-31	July	12:00		Morning
434	0	0	11.6667	-11.6667	0	0	0	Winter	2011-07-31	July	13:30		Afternoon
436	0	0	11.6667	-11.6667	0	0	0	Winter	2011-07-31	July	14:30		Afternoon
440	1	24	11.6667	12.3333	0	0	0	Winter	2011-07-31	July	16:30		Afternoon
442	1	24	11.6667	12.3333	0	0	0	Winter	2011-07-31	July	17:30	17:32 set	Dusk
453	2	48	11.6667	36.3333	0	0	0	Winter	2011-07-31	July	23:00		Night
460	4	96	15.3043	80.6957	0	0	0	Winter	2011-08-01	August	02:30		Night
462	1	24	15.3043	8.69565	0	0	0	Winter	2011-08-01	August	03:30		Night
471	5	120	15.3043	104.696	0	0	0	Winter	2011-08-01	August	08:00		Dawn
475	1	24	15.3043	8.69565	0	0	0	Winter	2011-08-01	August	10:00		Morning
545	0	0	1.33333	-1.33333	0	0	0	Winter	2011-08-08	August	0:00		Night
547	1	16	1.33333	14.6667	0	0	0	Winter	2011-08-08	August	1:00		Night
555	6	96	1.33333	94.6667	0	0	0	Winter	2011-08-08	August	5:00		Night
561	6	96	1.33333	94.6667	0	0	0	Winter	2011-08-08	August	8:00		Dawn
574	1	16	1.33333	14.6667	0	0	0	Winter	2011-08-08	August	14:30		Afternoon
578	14	224	1.33333	222.667	0	0	0	Winter	2011-08-08	August	16:30		Afternoon
589	0	0	1.33333	-1.33333	0	0	0	Winter	2011-08-08	August	22:00		Night
590	0	0	1.33333	-1.33333	0	0	0	Winter	2011-08-08	August	22:30		Night
591	1	16	1.33333	14.6667	0	0	0	Winter	2011-08-08	August	23:00		Night
599	7	112	0	112	0	0	0	Winter	2011-08-09	August	3:00		Night
600	2	32	0	32	0	0	0	Winter	2011-08-09	August	3:30		Night
614	0	0	0	0	0	0	0	Winter	2011-08-09	August	10:30		Morning
623	0	0	0	0	0	0	0	Winter	2011-08-09	August	15:00		Afternoon
632	0	0	0	0	0	0	0	Winter	2011-08-09	August	19:30		Night
636	0	0	0	0	0	0	0	Winter	2011-08-09	August	21:30		Night
646	1	16	0	16	0	0	0	Winter	2011-08-10	August	2:30		Night
649	6	96	0	96	0	0	0	Winter	2011-08-10	August	4:00		Night
657	0	0	0	0	0	0	0	Winter	2011-08-10	August	8:00		Dawn
668	0	0	0	0	0	0	0	Winter	2011-08-10	August	13:30		Afternoon
680	0	0	0	0	0	0	0	Winter	2011-08-10	August	19:30		Night
681	0	0	0	0	0	0	0	Winter	2011-08-10	August	20:00		Night
688	1	16	0	16	0	0	0	Winter	2011-08-10	August	23:30		Night
689	0	0	8.33333	-8.33333	0	0	0	Winter	2011-08-11	August	0:00		Night
690	0	0	8.33333	-8.33333	0	0	0	Winter	2011-08-11	August	0:30		Night
693	0	0	8.33333	-8.33333	0	0	0	Winter	2011-08-11	August	2:00		Night
694	0	0	8.33333	-8.33333	0	0	0	Winter	2011-08-11	August	2:30		Night
838	1	16	14.3333	1.66667	0	0	0	Winter	2011-08-14	August	2:30		Night
839	1	16	14.3333	1.66667	0	0	0	Winter	2011-08-14	August	3:00		Night
844	0	0	14.3333	-14.3333	0	0	0	Winter	2011-08-14	August	5:30		Night
846	18	288	14.3333	273.667	0	0	0	Winter	2011-08-14	August	6:30		Night
849	1	16	14.3333	1.66667	0	0	0	Winter	2011-08-14	August	8:00	8:08 rise	Dawn
856	0	0	14.3333	-14.3333	0	0	0	Winter	2011-08-14	August	11:30		Morning
860	0	0	14.3333	-14.3333	0	0	0	Winter	2011-08-14	August	13:30		Afternoon
876	0	0	14.3333	-14.3333	0	0	0	Winter	2011-08-14	August	21:30		Night
886	5	80	8	72	0	0	0	Winter	2011-08-15	August	2:30		Night
889	4	64	8	56	0	0	0	Winter	2011-08-15	August	4:00		Night
897	0	0	8	-8	0	0	0	Winter	2011-08-15	August	8:00	8:06 rise	Dawn
898	8	128	8	120	0	0	0	Winter	2011-08-15	August	8:30		Morning
942	18	288	0	288	0	0	0	Winter	2011-08-16	August	6:30		Night
989	0	0	0.666667	-0.666667	0	0	0	Winter	2011-08-17	August	6:00		Night
991	0	0	0.666667	-0.666667	0	0	0	Winter	2011-08-17	August	7:00	6:50 begin	Dawn
1000	2	32	0.666667	31.3333	0	0	0	Winter	2011-08-17	August	11:30		Morning
1001	8	128	0.666667	127.333	0	0	0	Winter	2011-08-17	August	12:00		Morning
1006	23	368	0.666667	367.333	0	0	0	Winter	2011-08-17	August	14:30		Afternoon
1008	17	272	0.666667	271.333	0	0	0	Winter	2011-08-17	August	15:30		Afternoon
1027	23	368	8	360	0	0	0	Winter	2011-08-18	August	1:00		Night
1036	3	48	8	40	0	0	0	Winter	2011-08-18	August	5:30		Night
1037	3	48	8	40	0	0	0	Winter	2011-08-18	August	6:00		Night
1038	8	128	8	120	0	0	0	Winter	2011-08-18	August	6:30		Night
1040	2	32	8	24	0	0	0	Winter	2011-08-18	August	7:30		Dawn
1042	4	64	8	56	0	0	0	Winter	2011-08-18	August	8:30		Morning
1043	0	0	8	-8	0	0	0	Winter	2011-08-18	August	9:00		Morning
1046	1	16	8	8	0	0	0	Winter	2011-08-18	August	10:30		Morning
1050	7	112	8	104	0	0	0	Winter	2011-08-18	August	12:30		Morning
1129	6	96	0	96	0	0	0	Winter	2011-08-20	August	4:00		Night
1135	0	0	0	0	0	0	0	Winter	2011-08-20	August	7:00		Dawn
1160	6	96	0	96	0	0	0	Winter	2011-08-20	August	19:30		Night
1166	17	272	0	272	0	0	0	Winter	2011-08-20	August	22:30		Night
1181	1	16	0	16	0	0	0	Winter	2011-08-21	August	6:00		Night
1223	0	0	0.666667	-0.666667	0	0	0	Winter	2011-08-22	August	3:00		Night
1227	0	0	0.666667	-0.666667	0	0	0	Winter	2011-08-22	August	5:00		Night
1231	0	0	0.666667	-0.666667	0	0	0	Winter	2011-08-22	August	7:00		Dawn
1232	0	0	0.666667	-0.666667	0	0	0	Winter	2011-08-22	August	7:30		Dawn
1233	2	32	0.666667	31.3333	0	0	0	Winter	2011-08-22	August	8:00	7:53 rise	Morning
1235	0	0	0.666667	-0.666667	0	0	0	Winter	2011-08-22	August	9:00		Morning
1241	2	32	0.666667	31.3333	0	0	0	Winter	2011-08-22	August	12:00		Morning
1295	0	0	0	0	0	0	0	Winter	2011-08-23	August	15:00		Afternoon
1300	0	0	0	0	0	0	0	Winter	2011-08-23	August	17:30		Afternoon
1301	1	16	0	16	0	0	0	Winter	2011-08-23	August	18:00	18:06 set	Afternoon
1314	1	16	2.33333	13.6667	0	0	0	Winter	2011-08-24	August	0:30		Night
1327	5	80	2.33333	77.6667	0	0	0	Winter	2011-08-24	August	7:00		Dawn
1334	0	0	2.33333	-2.33333	0	0	0	Winter	2011-08-24	August	10:30		Morning
1388	0	0	0	0	0	0	0	Winter	2011-08-25	August	13:30		Afternoon
1389	3	48	0	48	0	0	0	Winter	2011-08-25	August	14:00		Afternoon
1390	0	0	0	0	0	0	0	Winter	2011-08-25	August	14:30		Afternoon
1407	0	0	0	0	0	0	0	Winter	2011-08-25	August	23:00		Night
1427	3	48	3.66667	44.3333	0	0	0	Winter	2011-08-26	August	9:00		Morning
1458	1	16	2	14	0	0	0	Winter	2011-08-27	August	0:30		Night
1478	8	128	2	126	0	0	0	Winter	2011-08-27	August	10:30		Morning
1480	5	80	2	78	0	0	0	Winter	2011-08-27	August	11:30		Morning
1512	3	48	3.66667	44.3333	0	0	0	Winter	2011-08-28	August	3:30		Night
1520	0	0	3.66667	-3.66667	0	0	0	Winter	2011-08-28	August	7:30	7:40 rise	Morning
1521	0	0	3.66667	-3.66667	0	0	0	Winter	2011-08-28	August	8:00		Morning
1523	0	0	3.66667	-3.66667	0	0	0	Winter	2011-08-28	August	9:00		Morning
1525	0	0	3.66667	-3.66667	0	0	0	Winter	2011-08-28	August	10:00		Morning
1527	7	112	3.66667	108.333	0	0	0	Winter	2011-08-28	August	11:00		Morning
1528	0	0	3.66667	-3.66667	0	0	0	Winter	2011-08-28	August	11:30		Morning
1535	0	0	3.66667	-3.66667	0	0	0	Winter	2011-08-28	August	15:00		Afternoon
1566	0	0	8	-8	0	0	0	Winter	2011-08-29	August	6:30	6:27 begin	Dawn
1567	0	0	8	-8	0	0	0	Winter	2011-08-29	August	7:00		Dawn
1569	1	16	8	8	0	0	0	Winter	2011-08-29	August	8:00		Morning
1574	2	32	8	24	0	0	0	Winter	2011-08-29	August	10:30		Morning
1611	4	64	1	63	0	0	0	Winter	2011-08-30	August	5:00		Night
1656	2	32	2.66667	29.3333	0	0	0	Winter	2011-08-31	August	3:30		Night
1659	23	368	2.66667	365.333	0	0	0	Winter	2011-08-31	August	5:00		Night
1660	8	128	2.66667	125.333	0	0	0	Winter	2011-08-31	August	5:30		Night
1667	8	128	2.66667	125.333	0	0	0	Winter	2011-08-31	August	9:00		Morning
1668	4	64	2.66667	61.3333	0	0	0	Winter	2011-08-31	August	9:30		Morning
1670	5	80	2.66667	77.3333	0	0	0	Winter	2011-08-31	August	10:30		Morning
1696	0	0	2.66667	-2.66667	0	0	0	Winter	2011-08-31	August	23:30		Night
1701	1	16	0.333333	15.6667	0	0	0	Spring	2011-09-01	September	2:00		Night
1719	0	0	0.333333	-0.333333	0	0	0	Spring	2011-09-01	September	11:00		Morning
1722	0	0	0.333333	-0.333333	0	0	0	Spring	2011-09-01	September	12:30		Morning
1723	0	0	0.333333	-0.333333	0	0	0	Spring	2011-09-01	September	13:00	12:55 transit	Afternoon
1724	0	0	0.333333	-0.333333	0	0	0	Spring	2011-09-01	September	13:30		Afternoon
1725	0	0	0.333333	-0.333333	0	0	0	Spring	2011-09-01	September	14:00		Afternoon
1726	0	0	0.333333	-0.333333	0	0	0	Spring	2011-09-01	September	14:30		Afternoon
1727	0	0	0.333333	-0.333333	0	0	0	Spring	2011-09-01	September	15:00		Afternoon
1728	0	0	0.333333	-0.333333	0	0	0	Spring	2011-09-01	September	15:30		Afternoon
1729	0	0	0.333333	-0.333333	0	0	0	Spring	2011-09-01	September	16:00		Afternoon
1736	4	64	0.333333	63.6667	0	0	0	Spring	2011-09-01	September	19:30	19:30 end	Night
1740	2	32	0.333333	31.6667	0	0	0	Spring	2011-09-01	September	21:30		Night
1751	3	48	0.666667	47.3333	0	0	0	Spring	2011-09-02	September	3:00		Night
1757	0	0	0.666667	-0.666667	0	0	0	Spring	2011-09-02	September	6:00		Night
1758	0	0	0.666667	-0.666667	0	0	0	Spring	2011-09-02	September	6:30	6:19 begin	Dawn
1759	0	0	0.666667	-0.666667	0	0	0	Spring	2011-09-02	September	7:00		Dawn
1760	0	0	0.666667	-0.666667	0	0	0	Spring	2011-09-02	September	7:30	7:30 rise	Morning
1761	0	0	0.666667	-0.666667	0	0	0	Spring	2011-09-02	September	8:00		Morning
1762	0	0	0.666667	-0.666667	0	0	0	Spring	2011-09-02	September	8:30		Morning
1766	0	0	0.666667	-0.666667	0	0	0	Spring	2011-09-02	September	10:30		Morning
1767	1	16	0.666667	15.3333	0	0	0	Spring	2011-09-02	September	11:00		Morning
1769	0	0	0.666667	-0.666667	0	0	0	Spring	2011-09-02	September	12:00		Morning
1770	0	0	0.666667	-0.666667	0	0	0	Spring	2011-09-02	September	12:30		Morning
1773	0	0	0.666667	-0.666667	0	0	0	Spring	2011-09-02	September	14:00		Afternoon
1774	0	0	0.666667	-0.666667	0	0	0	Spring	2011-09-02	September	14:30		Afternoon
1775	0	0	0.666667	-0.666667	0	0	0	Spring	2011-09-02	September	15:00		Afternoon
1776	0	0	0.666667	-0.666667	0	0	0	Spring	2011-09-02	September	15:30		Afternoon
1777	0	0	0.666667	-0.666667	0	0	0	Spring	2011-09-02	September	16:00		Afternoon
1779	9	144	0.666667	143.333	0	0	0	Spring	2011-09-02	September	17:00		Afternoon
1781	2	32	0.666667	31.3333	0	0	0	Spring	2011-09-02	September	18:00		Afternoon
1791	0	0	0.666667	-0.666667	0	0	0	Spring	2011-09-02	September	23:00		Night
1798	0	0	0.333333	-0.333333	0	0	0	Spring	2011-09-03	September	2:30		Night
1805	0	0	0.333333	-0.333333	0	0	0	Spring	2011-09-03	September	6:00		Night
1812	0	0	0.333333	-0.333333	0	0	0	Spring	2011-09-03	September	9:30		Morning
1814	4	64	0.333333	63.6667	0	0	0	Spring	2011-09-03	September	10:30		Morning
1816	0	0	0.333333	-0.333333	0	0	0	Spring	2011-09-03	September	11:30		Morning
1818	0	0	0.333333	-0.333333	0	0	0	Spring	2011-09-03	September	12:30		Morning
1819	0	0	0.333333	-0.333333	0	0	0	Spring	2011-09-03	September	13:00	12:55 transit	Afternoon
1820	0	0	0.333333	-0.333333	0	0	0	Spring	2011-09-03	September	13:30		Afternoon
1822	0	0	0.333333	-0.333333	0	0	0	Spring	2011-09-03	September	14:30		Afternoon
1825	0	0	0.333333	-0.333333	0	0	0	Spring	2011-09-03	September	16:00		Afternoon
1827	0	0	0.333333	-0.333333	0	0	0	Spring	2011-09-03	September	17:00		Afternoon
1828	0	0	0.333333	-0.333333	0	0	0	Spring	2011-09-03	September	17:30		Afternoon
1829	0	0	0.333333	-0.333333	0	0	0	Spring	2011-09-03	September	18:00		Afternoon
1838	3	48	0.333333	47.6667	0	0	0	Spring	2011-09-03	September	22:30		Night
1839	1	16	0.333333	15.6667	0	0	0	Spring	2011-09-03	September	23:00		Night
1840	0	0	0.333333	-0.333333	0	0	0	Spring	2011-09-03	September	23:30		Night
1841	0	0	0	0	0	0	0	Spring	2011-09-04	September	0:00		Night
1844	0	0	0	0	0	0	0	Spring	2011-09-04	September	1:30		Night
1845	3	48	0	48	0	0	0	Spring	2011-09-04	September	2:00		Night
1849	0	0	0	0	0	0	0	Spring	2011-09-04	September	4:00		Night
1850	0	0	0	0	0	0	0	Spring	2011-09-04	September	4:30		Night
1851	0	0	0	0	0	0	0	Spring	2011-09-04	September	5:00		Night
1855	0	0	0	0	0	0	0	Spring	2011-09-04	September	7:00		Dawn
1860	0	0	0	0	0	0	0	Spring	2011-09-04	September	9:30		Morning
1864	0	0	0	0	0	0	0	Spring	2011-09-04	September	11:30		Morning
1865	0	0	0	0	0	0	0	Spring	2011-09-04	September	12:00		Morning
1866	0	0	0	0	0	0	0	Spring	2011-09-04	September	12:30		Morning
1871	0	0	0	0	0	0	0	Spring	2011-09-04	September	15:00		Afternoon
1874	0	0	0	0	0	0	0	Spring	2011-09-04	September	16:30		Afternoon
1886	0	0	0	0	0	0	0	Spring	2011-09-04	September	22:30		Night
1890	0	0	0	0	0	0	0	Spring	2011-09-05	September	0:30		Night
1909	3	48	0	48	0	0	0	Spring	2011-09-05	September	10:00		Morning
1915	1	16	0	16	0	0	0	Spring	2011-09-05	September	13:00	12:55 transit	Afternoon
1987	9	144	0	144	0	0	0	Spring	2011-09-07	September	1:00		Night
2003	0	0	0	0	0	0	0	Spring	2011-09-07	September	9:00		Morning
2004	0	0	0	0	0	0	0	Spring	2011-09-07	September	9:30		Morning
2008	2	32	0	32	0	0	0	Spring	2011-09-07	September	11:30		Morning
2011	0	0	0	0	0	0	0	Spring	2011-09-07	September	13:00	12:53 transit	Afternoon
2015	0	0	0	0	0	0	0	Spring	2011-09-07	September	15:00		Afternoon
2026	5	80	0	80	0	0	0	Spring	2011-09-07	September	20:30		Night
2035	0	0	0.333333	-0.333333	0	0	0	Spring	2011-09-08	September	1:00		Night
2051	1	16	0.333333	15.6667	0	0	0	Spring	2011-09-08	September	9:00		Morning
2052	2	32	0.333333	31.6667	0	0	0	Spring	2011-09-08	September	9:30		Morning
2056	1	16	0.333333	15.6667	0	0	0	Spring	2011-09-08	September	11:30		Morning
2059	3	48	0.333333	47.6667	0	0	0	Spring	2011-09-08	September	13:00	12:53 transit	Afternoon
2063	2	32	0.333333	31.6667	0	0	0	Spring	2011-09-08	September	15:00		Afternoon
2089	3	48	0.333333	47.6667	0	0	0	Spring	2011-09-09	September	4:00		Night
2091	0	0	0.333333	-0.333333	0	0	0	Spring	2011-09-09	September	5:00		Night
2097	4	64	0.333333	63.6667	0	0	0	Spring	2011-09-09	September	8:00		Morning
2098	0	0	0.333333	-0.333333	0	0	0	Spring	2011-09-09	September	8:30		Morning
2099	0	0	0.333333	-0.333333	0	0	0	Spring	2011-09-09	September	9:00		Morning
2101	1	16	0.333333	15.6667	0	0	0	Spring	2011-09-09	September	10:00		Morning
2102	0	0	0.333333	-0.333333	0	0	0	Spring	2011-09-09	September	10:30		Morning
2105	1	16	0.333333	15.6667	0	0	0	Spring	2011-09-09	September	12:00		Morning
2106	0	0	0.333333	-0.333333	0	0	0	Spring	2011-09-09	September	12:30		Morning
2107	0	0	0.333333	-0.333333	0	0	0	Spring	2011-09-09	September	13:00	12:53 transit	Afternoon
2108	0	0	0.333333	-0.333333	0	0	0	Spring	2011-09-09	September	13:30		Afternoon
2109	0	0	0.333333	-0.333333	0	0	0	Spring	2011-09-09	September	14:00		Afternoon
2121	0	0	0.333333	-0.333333	0	0	0	Spring	2011-09-09	September	20:00		Night
2128	0	0	0.333333	-0.333333	0	0	0	Spring	2011-09-09	September	23:30		Night
2129	0	0	0	0	0	0	0	Spring	2011-09-10	September	0:00		Night
2131	0	0	0	0	0	0	0	Spring	2011-09-10	September	1:00		Night
2132	0	0	0	0	0	0	0	Spring	2011-09-10	September	1:30		Night
2134	3	48	0	48	0	0	0	Spring	2011-09-10	September	2:30		Night
2138	4	64	0	64	0	0	0	Spring	2011-09-10	September	4:30		Night
2141	2	32	0	32	0	0	0	Spring	2011-09-10	September	6:00	6:02 begin	Dawn
2145	0	0	0	0	0	0	0	Spring	2011-09-10	September	8:00		Morning
2155	3	48	0	48	0	0	0	Spring	2011-09-10	September	13:00	12:52 transit	Afternoon
2159	0	0	0	0	0	0	0	Spring	2011-09-10	September	15:00		Afternoon
2170	0	0	0	0	0	0	0	Spring	2011-09-10	September	20:30		Night
2171	1	16	0	16	0	0	0	Spring	2011-09-10	September	21:00		Night
2172	1	16	0	16	0	0	0	Spring	2011-09-10	September	21:30		Night
2177	20	320	0	320	0	0	0	Spring	2011-09-11	September	0:00		Night
2186	4	64	0	64	0	0	0	Spring	2011-09-11	September	4:30		Night
2189	9	144	0	144	0	0	0	Spring	2011-09-11	September	6:00	6:00 begin	Dawn
2193	0	0	0	0	0	0	0	Spring	2011-09-11	September	8:00		Morning
2225	1	16	0	16	0	0	0	Spring	2011-09-12	September	0:00		Night
2231	21	336	0	336	0	0	0	Spring	2011-09-12	September	3:00		Night
2244	0	0	0	0	0	0	0	Spring	2011-09-12	September	9:30		Morning
2245	0	0	0	0	0	0	0	Spring	2011-09-12	September	10:00		Morning
2254	0	0	0	0	0	0	0	Spring	2011-09-12	September	14:30		Afternoon
2281	0	0	0	0	0	0	0	Spring	2011-09-13	September	4:00		Night
2293	1	16	0	16	0	0	0	Spring	2011-09-13	September	10:00		Morning
2294	6	96	0	96	0	0	0	Spring	2011-09-13	September	10:30		Morning
2295	2	32	0	32	0	0	0	Spring	2011-09-13	September	11:00		Morning
2298	1	16	0	16	0	0	0	Spring	2011-09-13	September	12:30		Morning
2300	0	0	0	0	0	0	0	Spring	2011-09-13	September	13:30		Afternoon
2309	1	16	0	16	0	0	0	Spring	2011-09-13	September	18:00		Afternoon
2314	0	0	0	0	0	0	0	Spring	2011-09-13	September	20:30		Night
2319	0	0	0	0	0	0	0	Spring	2011-09-13	September	23:00		Night
2320	0	0	0	0	0	0	0	Spring	2011-09-13	September	23:30		Night
2322	0	0	0	0	0	0	0	Spring	2011-09-14	September	0:30		Night
2323	0	0	0	0	0	0	0	Spring	2011-09-14	September	1:00		Night
2328	0	0	0	0	0	0	0	Spring	2011-09-14	September	3:30		Night
2329	0	0	0	0	0	0	0	Spring	2011-09-14	September	4:00		Night
2332	0	0	0	0	0	0	0	Spring	2011-09-14	September	5:30		Night
2333	0	0	0	0	0	0	0	Spring	2011-09-14	September	6:00	5:53 begin	Dawn
2334	1	16	0	16	0	0	0	Spring	2011-09-14	September	6:30		Dawn
2335	3	48	0	48	0	0	0	Spring	2011-09-14	September	7:00	7:04 rise	Dawn
2338	1	16	0	16	0	0	0	Spring	2011-09-14	September	8:30		Morning
2344	0	0	0	0	0	0	0	Spring	2011-09-14	September	11:30		Morning
2351	3	48	0	48	0	0	0	Spring	2011-09-14	September	15:00		Afternoon
2355	7	112	0	112	0	0	0	Spring	2011-09-14	September	17:00		Afternoon
2368	0	0	0	0	0	0	0	Spring	2011-09-14	September	23:30		Night
2369	0	0	0	0	0	0	0	Spring	2011-09-15	September	0:00		Night
2370	0	0	0	0	0	0	0	Spring	2011-09-15	September	0:30		Night
2371	0	0	0	0	0	0	0	Spring	2011-09-15	September	1:00		Night
2380	0	0	0	0	0	0	0	Spring	2011-09-15	September	5:30		Night
2382	0	0	0	0	0	0	0	Spring	2011-09-15	September	6:30		Dawn
2384	0	0	0	0	0	0	0	Spring	2011-09-15	September	7:30		Morning
2388	3	48	0	48	0	0	0	Spring	2011-09-15	September	9:30		Morning
2389	0	0	0	0	0	0	0	Spring	2011-09-15	September	10:00		Morning
2390	0	0	0	0	0	0	0	Spring	2011-09-15	September	10:30		Morning
2391	0	0	0	0	0	0	0	Spring	2011-09-15	September	11:00		Morning
2392	0	0	0	0	0	0	0	Spring	2011-09-15	September	11:30		Morning
2395	0	0	0	0	0	0	0	Spring	2011-09-15	September	13:00	12:50 transit	Afternoon
2397	0	0	0	0	0	0	0	Spring	2011-09-15	September	14:00		Afternoon
2399	0	0	0	0	0	0	0	Spring	2011-09-15	September	15:00		Afternoon
2400	0	0	0	0	0	0	0	Spring	2011-09-15	September	15:30		Afternoon
2401	1	16	0	16	0	0	0	Spring	2011-09-15	September	16:00		Afternoon
2402	1	16	0	16	0	0	0	Spring	2011-09-15	September	16:30		Afternoon
2407	5	80	0	80	0	0	0	Spring	2011-09-15	September	19:00		Dusk
2415	6	96	0	96	0	0	0	Spring	2011-09-15	September	23:00		Night
2417	0	0	0	0	0	0	0	Spring	2011-09-16	September	0:00		Night
2418	0	0	0	0	0	0	0	Spring	2011-09-16	September	0:30		Night
2421	0	0	0	0	0	0	0	Spring	2011-09-16	September	2:00		Night
2426	0	0	0	0	0	0	0	Spring	2011-09-16	September	4:30		Night
2428	0	0	0	0	0	0	0	Spring	2011-09-16	September	5:30		Night
2429	0	0	0	0	0	0	0	Spring	2011-09-16	September	6:00	5:49 begin	Dawn
2432	0	0	0	0	0	0	0	Spring	2011-09-16	September	7:30		Morning
2433	0	0	0	0	0	0	0	Spring	2011-09-16	September	8:00		Morning
2434	10	160	0	160	0	0	0	Spring	2011-09-16	September	8:30		Morning
2438	1	16	0	16	0	0	0	Spring	2011-09-16	September	10:30		Morning
2439	0	0	0	0	0	0	0	Spring	2011-09-16	September	11:00		Morning
2440	2	32	0	32	0	0	0	Spring	2011-09-16	September	11:30		Morning
2441	0	0	0	0	0	0	0	Spring	2011-09-16	September	12:00		Morning
2442	0	0	0	0	0	0	0	Spring	2011-09-16	September	12:30		Morning
2444	0	0	0	0	0	0	0	Spring	2011-09-16	September	13:30		Afternoon
2445	0	0	0	0	0	0	0	Spring	2011-09-16	September	14:00		Afternoon
2446	0	0	0	0	0	0	0	Spring	2011-09-16	September	14:30		Afternoon
2447	0	0	0	0	0	0	0	Spring	2011-09-16	September	15:00		Afternoon
2449	0	0	0	0	0	0	0	Spring	2011-09-16	September	16:00		Afternoon
2450	0	0	0	0	0	0	0	Spring	2011-09-16	September	16:30		Afternoon
2451	0	0	0	0	0	0	0	Spring	2011-09-16	September	17:00		Afternoon
2453	0	0	0	0	0	0	0	Spring	2011-09-16	September	18:00		Afternoon
2454	0	0	0	0	0	0	0	Spring	2011-09-16	September	18:30	18:42 set	Afternoon
2455	7	112	0	112	0	0	0	Spring	2011-09-16	September	19:00		Dusk
2456	0	0	0	0	0	0	0	Spring	2011-09-16	September	19:30		Dusk
2468	0	0	0	0	0	0	0	Spring	2011-09-17	September	1:30		Night
2472	0	0	0	0	0	0	0	Spring	2011-09-17	September	3:30		Night
2481	0	0	0	0	0	0	0	Spring	2011-09-17	September	8:00		Morning
2483	0	0	0	0	0	0	0	Spring	2011-09-17	September	9:00		Morning
2484	0	0	0	0	0	0	0	Spring	2011-09-17	September	9:30		Morning
2487	0	0	0	0	0	0	0	Spring	2011-09-17	September	11:00		Morning
2488	1	16	0	16	0	0	0	Spring	2011-09-17	September	11:30		Morning
2492	0	0	0	0	0	0	0	Spring	2011-09-17	September	13:30		Afternoon
2495	0	0	0	0	0	0	0	Spring	2011-09-17	September	15:00		Afternoon
2498	1	16	0	16	0	0	0	Spring	2011-09-17	September	16:30		Afternoon
2499	0	0	0	0	0	0	0	Spring	2011-09-17	September	17:00		Afternoon
2507	0	0	0	0	0	0	0	Spring	2011-09-17	September	21:00		Night
2508	0	0	0	0	0	0	0	Spring	2011-09-17	September	21:30		Night
2510	0	0	0	0	0	0	0	Spring	2011-09-17	September	22:30		Night
2511	0	0	0	0	0	0	0	Spring	2011-09-17	September	23:00		Night
2516	0	0	0	0	0	0	0	Spring	2011-09-18	September	1:30		Night
2519	0	0	0	0	0	0	0	Spring	2011-09-18	September	3:00		Night
2520	2	32	0	32	0	0	0	Spring	2011-09-18	September	3:30		Night
2521	0	0	0	0	0	0	0	Spring	2011-09-18	September	4:00		Night
2524	0	0	0	0	0	0	0	Spring	2011-09-18	September	5:30	5:44 begin	Night
2532	0	0	0	0	0	0	0	Spring	2011-09-18	September	9:30		Morning
2551	1	16	0	16	0	0	0	Spring	2011-09-18	September	19:00	18:45 set	Dusk
2555	7	112	0	112	0	0	0	Spring	2011-09-18	September	21:00		Night
2575	0	0	0	0	0	0	0	Spring	2011-09-19	September	7:00	6:53 rise	Morning
2577	0	0	0	0	0	0	0	Spring	2011-09-19	September	8:00		Morning
2584	1	16	0	16	0	0	0	Spring	2011-09-19	September	11:30		Morning
2588	2	32	0	32	0	0	0	Spring	2011-09-19	September	13:30		Afternoon
2592	0	0	0	0	0	0	0	Spring	2011-09-19	September	15:30		Afternoon
2594	1	16	0	16	0	0	0	Spring	2011-09-19	September	16:30		Afternoon
2597	1	16	0	16	0	0	0	Spring	2011-09-19	September	18:00		Afternoon
2607	11	176	0	176	0	0	0	Spring	2011-09-19	September	23:00		Night
2608	0	0	0	0	0	0	0	Spring	2011-09-19	September	23:30		Night
2619	0	0	0	0	0	0	0	Spring	2011-09-20	September	5:00		Night
2620	0	0	0	0	0	0	0	Spring	2011-09-20	September	5:30	5:40 begin	Night
2621	0	0	0	0	0	0	0	Spring	2011-09-20	September	6:00		Dawn
2623	0	0	0	0	0	0	0	Spring	2011-09-20	September	7:00	6:50 rise	Morning
2625	0	0	0	0	0	0	0	Spring	2011-09-20	September	8:00		Morning
2626	0	0	0	0	0	0	0	Spring	2011-09-20	September	8:30		Morning
2627	0	0	0	0	0	0	0	Spring	2011-09-20	September	9:00		Morning
2628	0	0	0	0	0	0	0	Spring	2011-09-20	September	9:30		Morning
2629	0	0	0	0	0	0	0	Spring	2011-09-20	September	10:00		Morning
2630	0	0	0	0	0	0	0	Spring	2011-09-20	September	10:30		Morning
2636	0	0	0	0	0	0	0	Spring	2011-09-20	September	13:30		Afternoon
2639	4	64	0	64	0	0	0	Spring	2011-09-20	September	15:00		Afternoon
2641	0	0	0	0	0	0	0	Spring	2011-09-20	September	16:00		Afternoon
2642	1	16	0	16	0	0	0	Spring	2011-09-20	September	16:30		Afternoon
2645	4	64	0	64	0	0	0	Spring	2011-09-20	September	18:00		Afternoon
2647	0	0	0	0	0	0	0	Spring	2011-09-20	September	19:00	18:48 set	Dusk
2650	0	0	0	0	0	0	0	Spring	2011-09-20	September	20:30		Night
2653	1	16	0	16	0	0	0	Spring	2011-09-20	September	22:00		Night
2654	6	96	0	96	0	0	0	Spring	2011-09-20	September	22:30		Night
2655	0	0	0	0	0	0	0	Spring	2011-09-20	September	23:00		Night
2656	0	0	0	0	0	0	0	Spring	2011-09-20	September	23:30		Night
2658	0	0	0	0	0	0	0	Spring	2011-09-21	September	0:30		Night
2659	0	0	0	0	0	0	0	Spring	2011-09-21	September	1:00		Night
2662	0	0	0	0	0	0	0	Spring	2011-09-21	September	2:30		Night
2664	2	32	0	32	0	0	0	Spring	2011-09-21	September	3:30		Night
2665	0	0	0	0	0	0	0	Spring	2011-09-21	September	4:00		Night
2666	0	0	0	0	0	0	0	Spring	2011-09-21	September	4:30		Night
2667	0	0	0	0	0	0	0	Spring	2011-09-21	September	5:00		Night
2668	0	0	0	0	0	0	0	Spring	2011-09-21	September	5:30	5:37 begin	Night
2669	4	64	0	64	0	0	0	Spring	2011-09-21	September	6:00		Dawn
2670	0	0	0	0	0	0	0	Spring	2011-09-21	September	6:30		Dawn
2671	0	0	0	0	0	0	0	Spring	2011-09-21	September	7:00	6:48 rise	Morning
2673	0	0	0	0	0	0	0	Spring	2011-09-21	September	8:00		Morning
2674	0	0	0	0	0	0	0	Spring	2011-09-21	September	8:30		Morning
2676	0	0	0	0	0	0	0	Spring	2011-09-21	September	9:30		Morning
2679	0	0	0	0	0	0	0	Spring	2011-09-21	September	11:00		Morning
2680	0	0	0	0	0	0	0	Spring	2011-09-21	September	11:30		Morning
2709	2	32	0	32	0	0	0	Spring	2011-09-22	September	2:00		Night
2713	0	0	0	0	0	0	0	Spring	2011-09-22	September	4:00		Night
2716	0	0	0	0	0	0	0	Spring	2011-09-22	September	5:30	5:35 begin	Night
2717	0	0	0	0	0	0	0	Spring	2011-09-22	September	6:00		Dawn
2722	0	0	0	0	0	0	0	Spring	2011-09-22	September	8:30		Morning
2723	0	0	0	0	0	0	0	Spring	2011-09-22	September	9:00		Morning
2724	3	48	0	48	0	0	0	Spring	2011-09-22	September	9:30		Morning
2727	0	0	0	0	0	0	0	Spring	2011-09-22	September	11:00		Morning
2728	0	0	0	0	0	0	0	Spring	2011-09-22	September	11:30		Morning
2729	0	0	0	0	0	0	0	Spring	2011-09-22	September	12:00		Morning
2730	0	0	0	0	0	0	0	Spring	2011-09-22	September	12:30		Morning
2731	0	0	0	0	0	0	0	Spring	2011-09-22	September	13:00	12:48 transit	Afternoon
2737	0	0	0	0	0	0	0	Spring	2011-09-22	September	16:00		Afternoon
2740	0	0	0	0	0	0	0	Spring	2011-09-22	September	17:30		Afternoon
2741	0	0	0	0	0	0	0	Spring	2011-09-22	September	18:00		Afternoon
2742	0	0	0	0	0	0	0	Spring	2011-09-22	September	18:30		Afternoon
2754	0	0	0	0	0	0	0	Spring	2011-09-23	September	0:30		Night
2762	2	32	0	32	0	0	0	Spring	2011-09-23	September	4:30		Night
2763	0	0	0	0	0	0	0	Spring	2011-09-23	September	5:00		Night
2764	0	0	0	0	0	0	0	Spring	2011-09-23	September	5:30	5:33 begin	Night
2765	0	0	0	0	0	0	0	Spring	2011-09-23	September	6:00		Dawn
2766	0	0	0	0	0	0	0	Spring	2011-09-23	September	6:30	6:44 rise	Dawn
2767	0	0	0	0	0	0	0	Spring	2011-09-23	September	7:00		Morning
2768	0	0	0	0	0	0	0	Spring	2011-09-23	September	7:30		Morning
2769	1	16	0	16	0	0	0	Spring	2011-09-23	September	8:00		Morning
2770	0	0	0	0	0	0	0	Spring	2011-09-23	September	8:30		Morning
2771	0	0	0	0	0	0	0	Spring	2011-09-23	September	9:00		Morning
2772	0	0	0	0	0	0	0	Spring	2011-09-23	September	9:30		Morning
2776	4	64	0	64	0	0	0	Spring	2011-09-23	September	11:30		Morning
2777	0	0	0	0	0	0	0	Spring	2011-09-23	September	12:00		Morning
2778	0	0	0	0	0	0	0	Spring	2011-09-23	September	12:30		Morning
2779	0	0	0	0	0	0	0	Spring	2011-09-23	September	13:00	12:48 transit	Afternoon
2780	0	0	0	0	0	0	0	Spring	2011-09-23	September	13:30		Afternoon
2782	0	0	0	0	0	0	0	Spring	2011-09-23	September	14:30		Afternoon
2784	0	0	0	0	0	0	0	Spring	2011-09-23	September	15:30		Afternoon
2798	0	0	0	0	0	0	0	Spring	2011-09-23	September	22:30		Night
2804	0	0	0	0	0	0	0	Spring	2011-09-24	September	1:30		Night
2805	0	0	0	0	0	0	0	Spring	2011-09-24	September	2:00		Night
2811	22	352	0	352	0	0	0	Spring	2011-09-24	September	5:00		Night
2812	1	16	0	16	0	0	0	Spring	2011-09-24	September	5:30	5:30 begin	Dawn
2815	0	0	0	0	0	0	0	Spring	2011-09-24	September	7:00		Morning
2816	0	0	0	0	0	0	0	Spring	2011-09-24	September	7:30		Morning
2818	0	0	0	0	0	0	0	Spring	2011-09-24	September	8:30		Morning
2821	0	0	0	0	0	0	0	Spring	2011-09-24	September	10:00		Morning
2822	0	0	0	0	0	0	0	Spring	2011-09-24	September	10:30		Morning
2831	0	0	0	0	0	0	0	Spring	2011-09-24	September	15:00		Afternoon
2832	0	0	0	0	0	0	0	Spring	2011-09-24	September	15:30		Afternoon
2833	11	176	0	176	0	0	0	Spring	2011-09-24	September	16:00		Afternoon
2834	5	80	0	80	0	0	0	Spring	2011-09-24	September	16:30		Afternoon
2835	0	0	0	0	0	0	0	Spring	2011-09-24	September	17:00		Afternoon
2837	0	0	0	0	0	0	0	Spring	2011-09-24	September	18:00		Afternoon
2838	0	0	0	0	0	0	0	Spring	2011-09-24	September	18:30		Afternoon
2839	0	0	0	0	0	0	0	Spring	2011-09-24	September	19:00	18:54 set	Dusk
2848	4	64	0	64	0	0	0	Spring	2011-09-24	September	23:30		Night
2850	0	0	0	0	0	0	0	Spring	2011-09-25	September	0:30		Night
2851	1	16	0	16	0	0	0	Spring	2011-09-25	September	1:00		Night
2852	0	0	0	0	0	0	0	Spring	2011-09-25	September	1:30		Night
2854	0	0	0	0	0	0	0	Spring	2011-09-25	September	3:30		Night
2857	1	16	0	16	0	0	0	Spring	2011-09-25	September	5:00		Night
2858	0	0	0	0	0	0	0	Spring	2011-09-25	September	5:30	5:28 begin	Dawn
2859	0	0	0	0	0	0	0	Spring	2011-09-25	September	6:00		Dawn
2860	0	0	0	0	0	0	0	Spring	2011-09-25	September	6:30	6:39 rise	Dawn
2861	0	0	0	0	0	0	0	Spring	2011-09-25	September	7:00		Morning
2862	0	0	0	0	0	0	0	Spring	2011-09-25	September	7:30		Morning
2863	0	0	0	0	0	0	0	Spring	2011-09-25	September	8:00		Morning
2864	0	0	0	0	0	0	0	Spring	2011-09-25	September	8:30		Morning
2865	0	0	0	0	0	0	0	Spring	2011-09-25	September	9:00		Morning
2867	1	16	0	16	0	0	0	Spring	2011-09-25	September	10:00		Morning
2868	0	0	0	0	0	0	0	Spring	2011-09-25	September	10:30		Morning
2869	0	0	0	0	0	0	0	Spring	2011-09-25	September	11:00		Morning
2870	0	0	0	0	0	0	0	Spring	2011-09-25	September	11:30		Morning
2871	0	0	0	0	0	0	0	Spring	2011-09-25	September	12:00		Morning
2872	0	0	0	0	0	0	0	Spring	2011-09-25	September	12:30	12:47 transit	Morning
2873	0	0	0	0	0	0	0	Spring	2011-09-25	September	13:00		Afternoon
2877	0	0	0	0	0	0	0	Spring	2011-09-25	September	15:00		Afternoon
2879	0	0	0	0	0	0	0	Spring	2011-09-25	September	16:00		Afternoon
2880	0	0	0	0	0	0	0	Spring	2011-09-25	September	16:30		Afternoon
2892	0	0	0	0	0	0	0	Spring	2011-09-25	September	22:30		Night
2893	0	0	0	0	0	0	0	Spring	2011-09-25	September	23:00		Night
2895	0	0	0	0	0	0	0	Spring	2011-09-26	September	0:00		Night
2898	0	0	0	0	0	0	0	Spring	2011-09-26	September	1:30		Night
2899	0	0	0	0	0	0	0	Spring	2011-09-26	September	2:00		Night
2901	0	0	0	0	0	0	0	Spring	2011-09-26	September	3:00		Night
2902	0	0	0	0	0	0	0	Spring	2011-09-26	September	3:30		Night
2907	0	0	0	0	0	0	0	Spring	2011-09-26	September	6:00		Dawn
2911	0	0	0	0	0	0	0	Spring	2011-09-26	September	8:00		Morning
2912	0	0	0	0	0	0	0	Spring	2011-09-26	September	8:30		Morning
2913	0	0	0	0	0	0	0	Spring	2011-09-26	September	9:00		Morning
2915	0	0	0	0	0	0	0	Spring	2011-09-26	September	10:00		Morning
2916	0	0	0	0	0	0	0	Spring	2011-09-26	September	10:30		Morning
2917	1	16	0	16	0	0	0	Spring	2011-09-26	September	11:00		Morning
2921	0	0	0	0	0	0	0	Spring	2011-09-26	September	13:00	12:47 transit	Afternoon
2928	0	0	0	0	0	0	0	Spring	2011-09-26	September	16:30		Afternoon
2931	0	0	0	0	0	0	0	Spring	2011-09-26	September	18:00		Afternoon
2932	0	0	0	0	0	0	0	Spring	2011-09-26	September	18:30		Afternoon
2934	0	0	0	0	0	0	0	Spring	2011-09-26	September	19:30		Dusk
2936	0	0	0	0	0	0	0	Spring	2011-09-26	September	20:30		Night
2937	0	0	0	0	0	0	0	Spring	2011-09-26	September	21:00		Night
2941	0	0	0	0	0	0	0	Spring	2011-09-26	September	23:00		Night
2944	0	0	0	0	0	0	0	Spring	2011-09-27	September	0:30		Night
2948	0	0	0	0	0	0	0	Spring	2011-09-27	September	2:30		Night
2949	0	0	0	0	0	0	0	Spring	2011-09-27	September	3:00		Night
2951	0	0	0	0	0	0	0	Spring	2011-09-27	September	4:00		Night
2954	0	0	0	0	0	0	0	Spring	2011-09-27	September	5:30	5:23 begin	Dawn
2955	0	0	0	0	0	0	0	Spring	2011-09-27	September	6:00		Dawn
2956	0	0	0	0	0	0	0	Spring	2011-09-27	September	6:30	6:35 rise	Dawn
2957	0	0	0	0	0	0	0	Spring	2011-09-27	September	7:00		Morning
2958	0	0	0	0	0	0	0	Spring	2011-09-27	September	7:30		Morning
2959	0	0	0	0	0	0	0	Spring	2011-09-27	September	8:00		Morning
2961	0	0	0	0	0	0	0	Spring	2011-09-27	September	9:00		Morning
2962	0	0	0	0	0	0	0	Spring	2011-09-27	September	9:30		Morning
2966	0	0	0	0	0	0	0	Spring	2011-09-27	September	11:30		Morning
2968	0	0	0	0	0	0	0	Spring	2011-09-27	September	12:30		Morning
2969	0	0	0	0	0	0	0	Spring	2011-09-27	September	13:00	12:46 transit	Afternoon
2970	0	0	0	0	0	0	0	Spring	2011-09-27	September	13:30		Afternoon
2973	0	0	0	0	0	0	0	Spring	2011-09-27	September	15:00		Afternoon
2974	0	0	0	0	0	0	0	Spring	2011-09-27	September	15:30		Afternoon
2978	3	48	0	48	0	0	0	Spring	2011-09-27	September	17:30		Afternoon
2979	0	0	0	0	0	0	0	Spring	2011-09-27	September	18:00		Afternoon
2985	0	0	0	0	0	0	0	Spring	2011-09-27	September	21:00		Night
2986	0	0	0	0	0	0	0	Spring	2011-09-27	September	21:30		Night
2992	0	0	0	0	0	0	0	Spring	2011-09-28	September	0:30		Night
3000	0	0	0	0	0	0	0	Spring	2011-09-28	September	4:30		Night
3002	0	0	0	0	0	0	0	Spring	2011-09-28	September	5:30	5:21 begin	Dawn
3003	0	0	0	0	0	0	0	Spring	2011-09-28	September	6:00		Dawn
3004	0	0	0	0	0	0	0	Spring	2011-09-28	September	6:30	6:32 rise	Dawn
3005	0	0	0	0	0	0	0	Spring	2011-09-28	September	7:00		Morning
3008	0	0	0	0	0	0	0	Spring	2011-09-28	September	8:30		Morning
3009	0	0	0	0	0	0	0	Spring	2011-09-28	September	9:00		Morning
3011	0	0	0	0	0	0	0	Spring	2011-09-28	September	10:00		Morning
3013	0	0	0	0	0	0	0	Spring	2011-09-28	September	11:00		Morning
3015	0	0	0	0	0	0	0	Spring	2011-09-28	September	12:00		Morning
3017	0	0	0	0	0	0	0	Spring	2011-09-28	September	13:00	12:46 transit	Afternoon
3018	0	0	0	0	0	0	0	Spring	2011-09-28	September	13:30		Afternoon
3019	0	0	0	0	0	0	0	Spring	2011-09-28	September	14:00		Afternoon
3020	0	0	0	0	0	0	0	Spring	2011-09-28	September	14:30		Afternoon
3021	0	0	0	0	0	0	0	Spring	2011-09-28	September	15:00		Afternoon
3022	0	0	0	0	0	0	0	Spring	2011-09-28	September	15:30		Afternoon
3023	0	0	0	0	0	0	0	Spring	2011-09-28	September	16:00		Afternoon
3025	0	0	0	0	0	0	0	Spring	2011-09-28	September	17:00		Afternoon
3026	0	0	0	0	0	0	0	Spring	2011-09-28	September	17:30		Afternoon
3027	0	0	0	0	0	0	0	Spring	2011-09-28	September	18:00		Afternoon
3028	0	0	0	0	0	0	0	Spring	2011-09-28	September	18:30		Afternoon
3029	0	0	0	0	0	0	0	Spring	2011-09-28	September	19:00	19:00 set	Dusk
3030	0	0	0	0	0	0	0	Spring	2011-09-28	September	19:30		Dusk
3031	0	0	0	0	0	0	0	Spring	2011-09-28	September	20:00	20:12 end	Dusk
3032	0	0	0	0	0	0	0	Spring	2011-09-28	September	20:30		Night
3037	0	0	0	0	0	0	0	Spring	2011-09-28	September	23:00		Night
3039	0	0	0	0	0	0	0	Spring	2011-09-29	September	0:00		Night
3044	1	16	0	16	0	0	0	Spring	2011-09-29	September	2:30		Night
3045	0	0	0	0	0	0	0	Spring	2011-09-29	September	3:00		Night
3047	0	0	0	0	0	0	0	Spring	2011-09-29	September	4:00		Night
3049	0	0	0	0	0	0	0	Spring	2011-09-29	September	5:00		Night
3053	0	0	0	0	0	0	0	Spring	2011-09-29	September	7:00		Morning
3055	0	0	0	0	0	0	0	Spring	2011-09-29	September	8:00		Morning
3056	0	0	0	0	0	0	0	Spring	2011-09-29	September	8:30		Morning
3057	0	0	0	0	0	0	0	Spring	2011-09-29	September	9:00		Morning
3059	3	48	0	48	0	0	0	Spring	2011-09-29	September	10:00		Morning
3060	0	0	0	0	0	0	0	Spring	2011-09-29	September	10:30		Morning
3061	0	0	0	0	0	0	0	Spring	2011-09-29	September	11:00		Morning
3062	0	0	0	0	0	0	0	Spring	2011-09-29	September	11:30		Morning
3063	0	0	0	0	0	0	0	Spring	2011-09-29	September	12:00		Morning
3064	0	0	0	0	0	0	0	Spring	2011-09-29	September	12:30		Morning
3065	0	0	0	0	0	0	0	Spring	2011-09-29	September	13:00	12:46 transit	Afternoon
3066	0	0	0	0	0	0	0	Spring	2011-09-29	September	13:30		Afternoon
3067	0	0	0	0	0	0	0	Spring	2011-09-29	September	14:00		Afternoon
3069	0	0	0	0	0	0	0	Spring	2011-09-29	September	15:00		Afternoon
3070	0	0	0	0	0	0	0	Spring	2011-09-29	September	15:30		Afternoon
3071	0	0	0	0	0	0	0	Spring	2011-09-29	September	16:00		Afternoon
3072	0	0	0	0	0	0	0	Spring	2011-09-29	September	16:30		Afternoon
3073	0	0	0	0	0	0	0	Spring	2011-09-29	September	17:00		Afternoon
3074	0	0	0	0	0	0	0	Spring	2011-09-29	September	17:30		Afternoon
3075	0	0	0	0	0	0	0	Spring	2011-09-29	September	18:00		Afternoon
3077	0	0	0	0	0	0	0	Spring	2011-09-29	September	19:00	19:02 set	Dusk
3078	0	0	0	0	0	0	0	Spring	2011-09-29	September	19:30		Dusk
3079	0	0	0	0	0	0	0	Spring	2011-09-29	September	20:00	20:14 end	Dusk
3080	0	0	0	0	0	0	0	Spring	2011-09-29	September	20:30		Night
3082	0	0	0	0	0	0	0	Spring	2011-09-29	September	21:30		Night
3083	0	0	0	0	0	0	0	Spring	2011-09-29	September	22:00		Night
3084	0	0	0	0	0	0	0	Spring	2011-09-29	September	22:30		Night
3085	0	0	0	0	0	0	0	Spring	2011-09-29	September	23:00		Night
3086	0	0	0	0	0	0	0	Spring	2011-09-29	September	23:30		Night
3087	0	0	0	0	0	0	0	Spring	2011-09-30	September	0:00		Night
3088	0	0	0	0	0	0	0	Spring	2011-09-30	September	0:30		Night
3089	0	0	0	0	0	0	0	Spring	2011-09-30	September	1:00		Night
3090	0	0	0	0	0	0	0	Spring	2011-09-30	September	1:30		Night
3091	0	0	0	0	0	0	0	Spring	2011-09-30	September	2:00		Night
3092	0	0	0	0	0	0	0	Spring	2011-09-30	September	2:30		Night
3095	0	0	0	0	0	0	0	Spring	2011-09-30	September	4:00		Night
3096	0	0	0	0	0	0	0	Spring	2011-09-30	September	4:30		Night
3097	0	0	0	0	0	0	0	Spring	2011-09-30	September	5:00		Night
3098	0	0	0	0	0	0	0	Spring	2011-09-30	September	5:30	5:16 begin	Dawn
3099	0	0	0	0	0	0	0	Spring	2011-09-30	September	6:00		Dawn
3100	0	0	0	0	0	0	0	Spring	2011-09-30	September	6:30	6:28 rise	Morning
3101	0	0	0	0	0	0	0	Spring	2011-09-30	September	7:00		Morning
3102	0	0	0	0	0	0	0	Spring	2011-09-30	September	7:30		Morning
3103	0	0	0	0	0	0	0	Spring	2011-09-30	September	8:00		Morning
3104	0	0	0	0	0	0	0	Spring	2011-09-30	September	8:30		Morning
3105	0	0	0	0	0	0	0	Spring	2011-09-30	September	9:00		Morning
3106	0	0	0	0	0	0	0	Spring	2011-09-30	September	9:30		Morning
3107	0	0	0	0	0	0	0	Spring	2011-09-30	September	10:00		Morning
3108	0	0	0	0	0	0	0	Spring	2011-09-30	September	10:30		Morning
3109	0	0	0	0	0	0	0	Spring	2011-09-30	September	11:00		Morning
3110	0	0	0	0	0	0	0	Spring	2011-09-30	September	11:30		Morning
3111	0	0	0	0	0	0	0	Spring	2011-09-30	September	12:00		Morning
3112	0	0	0	0	0	0	0	Spring	2011-09-30	September	12:30		Morning
3113	0	0	0	0	0	0	0	Spring	2011-09-30	September	13:00	12:45 transit	Afternoon
3114	0	0	0	0	0	0	0	Spring	2011-09-30	September	13:30		Afternoon
3116	0	0	0	0	0	0	0	Spring	2011-09-30	September	14:30		Afternoon
3117	0	0	0	0	0	0	0	Spring	2011-09-30	September	15:00		Afternoon
3120	0	0	0	0	0	0	0	Spring	2011-09-30	September	16:30		Afternoon
3127	0	0	0	0	0	0	0	Spring	2011-09-30	September	20:00		Dusk
3128	0	0	0	0	0	0	0	Spring	2011-09-30	September	20:30	20:16 end	Night
3129	0	0	0	0	0	0	0	Spring	2011-09-30	September	21:00		Night
3130	0	0	0	0	0	0	0	Spring	2011-09-30	September	21:30		Night
3132	0	0	0	0	0	0	0	Spring	2011-09-30	September	22:30		Night
3133	0	0	0	0	0	0	0	Spring	2011-09-30	September	23:00		Night
3134	0	0	0	0	0	0	0	Spring	2011-09-30	September	23:30		Night
3135	0	0	0	0	0	0	0	Spring	2011-10-01	October	0:00		Night
3136	0	0	0	0	0	0	0	Spring	2011-10-01	October	0:30		Night
3137	0	0	0	0	0	0	0	Spring	2011-10-01	October	1:00		Night
3139	0	0	0	0	0	0	0	Spring	2011-10-01	October	2:00		Night
3141	0	0	0	0	0	0	0	Spring	2011-10-01	October	3:00		Night
3142	0	0	0	0	0	0	0	Spring	2011-10-01	October	3:30		Night
3143	0	0	0	0	0	0	0	Spring	2011-10-01	October	4:00		Night
3145	0	0	0	0	0	0	0	Spring	2011-10-01	October	5:00	5:14 begin	Night
3146	0	0	0	0	0	0	0	Spring	2011-10-01	October	5:30		Dawn
3147	0	0	0	0	0	0	0	Spring	2011-10-01	October	6:00		Dawn
3148	0	0	0	0	0	0	0	Spring	2011-10-01	October	6:30	6:26 rise	Morning
3149	0	0	0	0	0	0	0	Spring	2011-10-01	October	7:00		Morning
3150	0	0	0	0	0	0	0	Spring	2011-10-01	October	7:30		Morning
3151	0	0	0	0	0	0	0	Spring	2011-10-01	October	8:00		Morning
3152	0	0	0	0	0	0	0	Spring	2011-10-01	October	8:30		Morning
3153	0	0	0	0	0	0	0	Spring	2011-10-01	October	9:00		Morning
3154	0	0	0	0	0	0	0	Spring	2011-10-01	October	9:30		Morning
3155	0	0	0	0	0	0	0	Spring	2011-10-01	October	10:00		Morning
3156	0	0	0	0	0	0	0	Spring	2011-10-01	October	10:30		Morning
3157	0	0	0	0	0	0	0	Spring	2011-10-01	October	11:00		Morning
3158	0	0	0	0	0	0	0	Spring	2011-10-01	October	11:30		Morning
3159	0	0	0	0	0	0	0	Spring	2011-10-01	October	12:00		Morning
3160	0	0	0	0	0	0	0	Spring	2011-10-01	October	12:30		Morning
3161	0	0	0	0	0	0	0	Spring	2011-10-01	October	13:00	12:45 transit	Afternoon
3162	0	0	0	0	0	0	0	Spring	2011-10-01	October	13:30		Afternoon
3163	0	0	0	0	0	0	0	Spring	2011-10-01	October	14:00		Afternoon
3164	0	0	0	0	0	0	0	Spring	2011-10-01	October	14:30		Afternoon
3166	0	0	0	0	0	0	0	Spring	2011-10-01	October	15:30		Afternoon
3167	0	0	0	0	0	0	0	Spring	2011-10-01	October	16:00		Afternoon
3169	0	0	0	0	0	0	0	Spring	2011-10-01	October	17:00		Afternoon
3170	0	0	0	0	0	0	0	Spring	2011-10-01	October	17:30		Afternoon
3171	0	0	0	0	0	0	0	Spring	2011-10-01	October	18:00		Afternoon
3172	0	0	0	0	0	0	0	Spring	2011-10-01	October	18:30		Afternoon
3173	0	0	0	0	0	0	0	Spring	2011-10-01	October	19:00	19:05 set	Afternoon
3174	0	0	0	0	0	0	0	Spring	2011-10-01	October	19:30		Dusk
3175	0	0	0	0	0	0	0	Spring	2011-10-01	October	20:00		Dusk
3176	0	0	0	0	0	0	0	Spring	2011-10-01	October	20:30	20:17 end	Night
3177	0	0	0	0	0	0	0	Spring	2011-10-01	October	21:00		Night
3178	0	0	0	0	0	0	0	Spring	2011-10-01	October	21:30		Night
3179	0	0	0	0	0	0	0	Spring	2011-10-01	October	22:00		Night
3180	0	0	0	0	0	0	0	Spring	2011-10-01	October	22:30		Night
3181	0	0	0	0	0	0	0	Spring	2011-10-01	October	23:00		Night
3182	0	0	0	0	0	0	0	Spring	2011-10-01	October	23:30		Night
3183	0	0	0	0	0	0	0	Spring	2011-10-02	October	0:00		Night
3184	0	0	0	0	0	0	0	Spring	2011-10-02	October	0:30		Night
3185	0	0	0	0	0	0	0	Spring	2011-10-02	October	1:00		Night
3186	0	0	0	0	0	0	0	Spring	2011-10-02	October	1:30		Night
3187	0	0	0	0	0	0	0	Spring	2011-10-02	October	2:00		Night
3188	0	0	0	0	0	0	0	Spring	2011-10-02	October	2:30		Night
3189	0	0	0	0	0	0	0	Spring	2011-10-02	October	3:00		Night
3190	0	0	0	0	0	0	0	Spring	2011-10-02	October	3:30		Night
3193	0	0	0	0	0	0	0	Spring	2011-10-02	October	5:00	5:11 begin	Night
3194	0	0	0	0	0	0	0	Spring	2011-10-02	October	5:30		Dawn
3195	0	0	0	0	0	0	0	Spring	2011-10-02	October	6:00		Dawn
3196	0	0	0	0	0	0	0	Spring	2011-10-02	October	6:30	6:23 rise	Morning
3197	0	0	0	0	0	0	0	Spring	2011-10-02	October	7:00		Morning
3198	0	0	0	0	0	0	0	Spring	2011-10-02	October	7:30		Morning
3199	0	0	0	0	0	0	0	Spring	2011-10-02	October	8:00		Morning
3200	0	0	0	0	0	0	0	Spring	2011-10-02	October	8:30		Morning
3201	0	0	0	0	0	0	0	Spring	2011-10-02	October	9:00		Morning
3202	1	16	0	16	0	0	0	Spring	2011-10-02	October	9:30		Morning
3203	0	0	0	0	0	0	0	Spring	2011-10-02	October	10:00		Morning
3204	0	0	0	0	0	0	0	Spring	2011-10-02	October	10:30		Morning
3205	0	0	0	0	0	0	0	Spring	2011-10-02	October	11:00		Morning
3206	0	0	0	0	0	0	0	Spring	2011-10-02	October	11:30		Morning
3207	0	0	0	0	0	0	0	Spring	2011-10-02	October	12:00		Morning
3208	0	0	0	0	0	0	0	Spring	2011-10-02	October	12:30		Morning
3209	0	0	0	0	0	0	0	Spring	2011-10-02	October	13:00	12:45 transit	Afternoon
3210	0	0	0	0	0	0	0	Spring	2011-10-02	October	13:30		Afternoon
3211	0	0	0	0	0	0	0	Spring	2011-10-02	October	14:00		Afternoon
3212	0	0	0	0	0	0	0	Spring	2011-10-02	October	14:30		Afternoon
3215	0	0	0	0	0	0	0	Spring	2011-10-02	October	16:00		Afternoon
3216	0	0	0	0	0	0	0	Spring	2011-10-02	October	16:30		Afternoon
3217	0	0	0	0	0	0	0	Spring	2011-10-02	October	17:00		Afternoon
3222	0	0	0	0	0	0	0	Spring	2011-10-02	October	19:30		Dusk
3229	0	0	0	0	0	0	0	Spring	2011-10-02	October	23:00		Night
3233	0	0	0	0	0	0	0	Spring	2011-10-03	October	1:00		Night
3240	0	0	0	0	0	0	0	Spring	2011-10-03	October	4:30		Night
3247	0	0	0	0	0	0	0	Spring	2011-10-03	October	8:00		Morning
3248	0	0	0	0	0	0	0	Spring	2011-10-03	October	8:30		Morning
3249	0	0	0	0	0	0	0	Spring	2011-10-03	October	9:00		Morning
3252	0	0	0	0	0	0	0	Spring	2011-10-03	October	10:30		Morning
3256	0	0	0	0	0	0	0	Spring	2011-10-03	October	12:30		Morning
3262	0	0	0	0	0	0	0	Spring	2011-10-03	October	15:30		Afternoon
3263	0	0	0	0	0	0	0	Spring	2011-10-03	October	16:00		Afternoon
3264	0	0	0	0	0	0	0	Spring	2011-10-03	October	16:30		Afternoon
3265	0	0	0	0	0	0	0	Spring	2011-10-03	October	17:00		Afternoon
3270	0	0	0	0	0	0	0	Spring	2011-10-03	October	19:30		Dusk
3274	0	0	0	0	0	0	0	Spring	2011-10-03	October	21:30		Night
3276	0	0	0	0	0	0	0	Spring	2011-10-03	October	22:30		Night
3277	0	0	0	0	0	0	0	Spring	2011-10-03	October	23:00		Night
3279	3	48	0	48	0	0	0	Spring	2011-10-04	October	0:00		Night
3280	3	48	0	48	0	0	0	Spring	2011-10-04	October	0:30		Night
3284	5	80	0	80	0	0	0	Spring	2011-10-04	October	2:30		Night
3285	3	48	0	48	0	0	0	Spring	2011-10-04	October	3:00		Night
3293	5	80	0	80	0	0	0	Spring	2011-10-04	October	7:00		Morning
3297	0	0	0	0	0	0	0	Spring	2011-10-04	October	9:00		Morning
3308	0	0	0	0	0	0	0	Spring	2011-10-04	October	14:30		Afternoon
3313	1	16	0	16	0	0	0	Spring	2011-10-04	October	17:00		Afternoon
3316	0	0	0	0	0	0	0	Spring	2011-10-04	October	18:30		Afternoon
3319	0	0	0	0	0	0	0	Spring	2011-10-04	October	20:00		Dusk
3322	4	64	0	64	0	0	0	Spring	2011-10-04	October	21:30		Night
3324	0	0	0	0	0	0	0	Spring	2011-10-04	October	22:30		Night
3325	0	0	0	0	0	0	0	Spring	2011-10-04	October	23:00		Night
3327	0	0	0	0	0	0	0	Spring	2011-10-05	October	0:00		Night
3330	0	0	0	0	0	0	0	Spring	2011-10-05	October	1:30		Night
3332	0	0	0	0	0	0	0	Spring	2011-10-05	October	2:30		Night
3333	0	0	0	0	0	0	0	Spring	2011-10-05	October	3:00		Night
3334	0	0	0	0	0	0	0	Spring	2011-10-05	October	3:30		Night
3335	0	0	0	0	0	0	0	Spring	2011-10-05	October	4:00		Night
3340	0	0	0	0	0	0	0	Spring	2011-10-05	October	6:30	6:17 rise	Morning
3341	0	0	0	0	0	0	0	Spring	2011-10-05	October	7:00		Morning
3342	0	0	0	0	0	0	0	Spring	2011-10-05	October	7:30		Morning
3343	0	0	0	0	0	0	0	Spring	2011-10-05	October	8:00		Morning
3344	1	16	0	16	0	0	0	Spring	2011-10-05	October	8:30		Morning
3345	0	0	0	0	0	0	0	Spring	2011-10-05	October	9:00		Morning
3346	0	0	0	0	0	0	0	Spring	2011-10-05	October	9:30		Morning
3349	0	0	0	0	0	0	0	Spring	2011-10-05	October	11:00		Morning
3351	0	0	0	0	0	0	0	Spring	2011-10-05	October	12:00		Morning
3355	0	0	0	0	0	0	0	Spring	2011-10-05	October	14:00		Afternoon
3356	0	0	0	0	0	0	0	Spring	2011-10-05	October	14:30		Afternoon
3358	0	0	0	0	0	0	0	Spring	2011-10-05	October	15:30		Afternoon
3359	0	0	0	0	0	0	0	Spring	2011-10-05	October	16:00		Afternoon
3361	0	0	0	0	0	0	0	Spring	2011-10-05	October	17:00		Afternoon
3362	0	0	0	0	0	0	0	Spring	2011-10-05	October	17:30		Afternoon
3363	0	0	0	0	0	0	0	Spring	2011-10-05	October	18:00		Afternoon
3364	0	0	0	0	0	0	0	Spring	2011-10-05	October	18:30		Afternoon
3365	2	32	0	32	0	0	0	Spring	2011-10-05	October	19:00	19:11 set	Afternoon
3366	0	0	0	0	0	0	0	Spring	2011-10-05	October	19:30		Dusk
3367	1	16	0	16	0	0	0	Spring	2011-10-05	October	20:00		Dusk
3368	0	0	0	0	0	0	0	Spring	2011-10-05	October	20:30	20:25 end	Night
3369	0	0	0	0	0	0	0	Spring	2011-10-05	October	21:00		Night
3370	0	0	0	0	0	0	0	Spring	2011-10-05	October	21:30		Night
3371	0	0	0	0	0	0	0	Spring	2011-10-05	October	22:00		Night
3372	0	0	0	0	0	0	0	Spring	2011-10-05	October	22:30		Night
3373	0	0	0	0	0	0	0	Spring	2011-10-05	October	23:00		Night
3374	0	0	0	0	0	0	0	Spring	2011-10-05	October	23:30		Night
3375	0	0	0	0	0	0	0	Spring	2011-10-06	October	0:00		Night
3376	0	0	0	0	0	0	0	Spring	2011-10-06	October	0:30		Night
3377	0	0	0	0	0	0	0	Spring	2011-10-06	October	1:00		Night
3378	0	0	0	0	0	0	0	Spring	2011-10-06	October	1:30		Night
3379	0	0	0	0	0	0	0	Spring	2011-10-06	October	2:00		Night
3380	0	0	0	0	0	0	0	Spring	2011-10-06	October	2:30		Night
3381	0	0	0	0	0	0	0	Spring	2011-10-06	October	3:00		Night
3382	0	0	0	0	0	0	0	Spring	2011-10-06	October	3:30		Night
3383	0	0	0	0	0	0	0	Spring	2011-10-06	October	4:00		Night
3384	0	0	0	0	0	0	0	Spring	2011-10-06	October	4:30		Night
3385	0	0	0	0	0	0	0	Spring	2011-10-06	October	5:00	5:02 begin	Dawn
3387	0	0	0	0	0	0	0	Spring	2011-10-06	October	6:00	6:15 rise	Dawn
3388	1	16	0	16	0	0	0	Spring	2011-10-06	October	6:30		Morning
3389	1	16	0	16	0	0	0	Spring	2011-10-06	October	7:00		Morning
3390	0	0	0	0	0	0	0	Spring	2011-10-06	October	7:30		Morning
3391	0	0	0	0	0	0	0	Spring	2011-10-06	October	8:00		Morning
3392	0	0	0	0	0	0	0	Spring	2011-10-06	October	8:30		Morning
3393	0	0	0	0	0	0	0	Spring	2011-10-06	October	9:00		Morning
3394	0	0	0	0	0	0	0	Spring	2011-10-06	October	9:30		Morning
3395	0	0	0	0	0	0	0	Spring	2011-10-06	October	10:00		Morning
3396	0	0	0	0	0	0	0	Spring	2011-10-06	October	10:30		Morning
3397	0	0	0	0	0	0	0	Spring	2011-10-06	October	11:00		Morning
3398	0	0	0	0	0	0	0	Spring	2011-10-06	October	11:30		Morning
3399	0	0	0	0	0	0	0	Spring	2011-10-06	October	12:00		Morning
3400	0	0	0	0	0	0	0	Spring	2011-10-06	October	12:30		Morning
3401	0	0	0	0	0	0	0	Spring	2011-10-06	October	13:00	12:43 transit	Afternoon
3402	0	0	0	0	0	0	0	Spring	2011-10-06	October	13:30		Afternoon
3403	0	0	0	0	0	0	0	Spring	2011-10-06	October	14:00		Afternoon
3404	0	0	0	0	0	0	0	Spring	2011-10-06	October	14:30		Afternoon
3405	0	0	0	0	0	0	0	Spring	2011-10-06	October	15:00		Afternoon
3406	0	0	0	0	0	0	0	Spring	2011-10-06	October	15:30		Afternoon
3407	0	0	0	0	0	0	0	Spring	2011-10-06	October	16:00		Afternoon
3408	0	0	0	0	0	0	0	Spring	2011-10-06	October	16:30		Afternoon
3409	0	0	0	0	0	0	0	Spring	2011-10-06	October	17:00		Afternoon
3410	0	0	0	0	0	0	0	Spring	2011-10-06	October	17:30		Afternoon
3411	0	0	0	0	0	0	0	Spring	2011-10-06	October	18:00		Afternoon
3412	0	0	0	0	0	0	0	Spring	2011-10-06	October	18:30		Afternoon
3413	0	0	0	0	0	0	0	Spring	2011-10-06	October	19:00		Afternoon
3414	0	0	0	0	0	0	0	Spring	2011-10-06	October	19:30	19:13 set	Dusk
3415	0	0	0	0	0	0	0	Spring	2011-10-06	October	20:00		Dusk
3416	0	0	0	0	0	0	0	Spring	2011-10-06	October	20:30	20:26 end	Night
3417	0	0	0	0	0	0	0	Spring	2011-10-06	October	21:00		Night
3418	0	0	0	0	0	0	0	Spring	2011-10-06	October	21:30		Night
3419	0	0	0	0	0	0	0	Spring	2011-10-06	October	22:00		Night
3420	0	0	0	0	0	0	0	Spring	2011-10-06	October	22:30		Night
3421	0	0	0	0	0	0	0	Spring	2011-10-06	October	23:00		Night
3422	0	0	0	0	0	0	0	Spring	2011-10-06	October	23:30		Night
3423	0	0	0	0	0	0	0	Spring	2011-10-07	October	0:00		Night
3424	0	0	0	0	0	0	0	Spring	2011-10-07	October	0:30		Night
3425	0	0	0	0	0	0	0	Spring	2011-10-07	October	1:00		Night
3426	0	0	0	0	0	0	0	Spring	2011-10-07	October	1:30		Night
3427	0	0	0	0	0	0	0	Spring	2011-10-07	October	2:00		Night
3428	0	0	0	0	0	0	0	Spring	2011-10-07	October	2:30		Night
3429	0	0	0	0	0	0	0	Spring	2011-10-07	October	3:00		Night
3430	0	0	0	0	0	0	0	Spring	2011-10-07	October	3:30		Night
3431	0	0	0	0	0	0	0	Spring	2011-10-07	October	4:00		Night
3432	0	0	0	0	0	0	0	Spring	2011-10-07	October	4:30		Night
3433	0	0	0	0	0	0	0	Spring	2011-10-07	October	5:00	4:59 begin	Dawn
3434	0	0	0	0	0	0	0	Spring	2011-10-07	October	5:30		Dawn
3435	0	0	0	0	0	0	0	Spring	2011-10-07	October	6:00	6:12 rise	Dawn
3436	0	0	0	0	0	0	0	Spring	2011-10-07	October	6:30		Morning
3437	0	0	0	0	0	0	0	Spring	2011-10-07	October	7:00		Morning
3438	0	0	0	0	0	0	0	Spring	2011-10-07	October	7:30		Morning
3439	0	0	0	0	0	0	0	Spring	2011-10-07	October	8:00		Morning
3440	0	0	0	0	0	0	0	Spring	2011-10-07	October	8:30		Morning
3441	0	0	0	0	0	0	0	Spring	2011-10-07	October	9:00		Morning
3442	0	0	0	0	0	0	0	Spring	2011-10-07	October	9:30		Morning
3443	0	0	0	0	0	0	0	Spring	2011-10-07	October	10:00		Morning
3444	0	0	0	0	0	0	0	Spring	2011-10-07	October	10:30		Morning
3445	0	0	0	0	0	0	0	Spring	2011-10-07	October	11:00		Morning
3446	0	0	0	0	0	0	0	Spring	2011-10-07	October	11:30		Morning
3447	0	0	0	0	0	0	0	Spring	2011-10-07	October	12:00		Morning
3448	0	0	0	0	0	0	0	Spring	2011-10-07	October	12:30		Morning
3449	0	0	0	0	0	0	0	Spring	2011-10-07	October	13:00	12:43 transit	Afternoon
3455	0	0	0	0	0	0	0	Spring	2011-10-07	October	16:00		Afternoon
3456	0	0	0	0	0	0	0	Spring	2011-10-07	October	16:30		Afternoon
3457	0	0	0	0	0	0	0	Spring	2011-10-07	October	17:00		Afternoon
3458	0	0	0	0	0	0	0	Spring	2011-10-07	October	17:30		Afternoon
3459	0	0	0	0	0	0	0	Spring	2011-10-07	October	18:00		Afternoon
3460	0	0	0	0	0	0	0	Spring	2011-10-07	October	18:30		Afternoon
3461	0	0	0	0	0	0	0	Spring	2011-10-07	October	19:00		Afternoon
3462	0	0	0	0	0	0	0	Spring	2011-10-07	October	19:30	19:15 set	Dusk
3463	0	0	0	0	0	0	0	Spring	2011-10-07	October	20:00		Dusk
3464	0	0	0	0	0	0	0	Spring	2011-10-07	October	20:30	20:28 end	Night
3465	0	0	0	0	0	0	0	Spring	2011-10-07	October	21:00		Night
3466	0	0	0	0	0	0	0	Spring	2011-10-07	October	21:30		Night
3467	3	48	0	48	0	0	0	Spring	2011-10-07	October	22:00		Night
3468	0	0	0	0	0	0	0	Spring	2011-10-07	October	22:30		Night
3469	0	0	0	0	0	0	0	Spring	2011-10-07	October	23:00		Night
3470	0	0	0	0	0	0	0	Spring	2011-10-07	October	23:30		Night
3471	0	0	0	0	0	0	0	Spring	2011-10-08	October	0:00		Night
3472	0	0	0	0	0	0	0	Spring	2011-10-08	October	0:30		Night
3474	0	0	0	0	0	0	0	Spring	2011-10-08	October	1:30		Night
3475	8	128	0	128	0	0	0	Spring	2011-10-08	October	2:00		Night
3476	5	80	0	80	0	0	0	Spring	2011-10-08	October	2:30		Night
3477	7	112	0	112	0	0	0	Spring	2011-10-08	October	3:00		Night
3478	5	80	0	80	0	0	0	Spring	2011-10-08	October	3:30		Night
3479	5	80	0	80	0	0	0	Spring	2011-10-08	October	4:00		Night
3480	0	0	0	0	0	0	0	Spring	2011-10-08	October	4:30		Night
3481	0	0	0	0	0	0	0	Spring	2011-10-08	October	5:00	4:57 begin	Dawn
3482	0	0	0	0	0	0	0	Spring	2011-10-08	October	5:30		Dawn
3483	0	0	0	0	0	0	0	Spring	2011-10-08	October	6:00	6:10 rise	Dawn
3484	0	0	0	0	0	0	0	Spring	2011-10-08	October	6:30		Morning
3485	0	0	0	0	0	0	0	Spring	2011-10-08	October	7:00		Morning
3486	0	0	0	0	0	0	0	Spring	2011-10-08	October	7:30		Morning
3487	0	0	0	0	0	0	0	Spring	2011-10-08	October	8:00		Morning
3488	10	160	0	160	0	0	0	Spring	2011-10-08	October	8:30		Morning
3489	0	0	0	0	0	0	0	Spring	2011-10-08	October	9:00		Morning
3490	0	0	0	0	0	0	0	Spring	2011-10-08	October	9:30		Morning
3491	0	0	0	0	0	0	0	Spring	2011-10-08	October	10:00		Morning
3492	0	0	0	0	0	0	0	Spring	2011-10-08	October	10:30		Morning
3493	0	0	0	0	0	0	0	Spring	2011-10-08	October	11:00		Morning
3494	0	0	0	0	0	0	0	Spring	2011-10-08	October	11:30		Morning
3495	0	0	0	0	0	0	0	Spring	2011-10-08	October	12:00		Morning
3496	1	16	0	16	0	0	0	Spring	2011-10-08	October	12:30		Morning
3497	0	0	0	0	0	0	0	Spring	2011-10-08	October	13:00	12:43 transit	Afternoon
3503	1	16	0	16	0	0	0	Spring	2011-10-08	October	16:00		Afternoon
3504	0	0	0	0	0	0	0	Spring	2011-10-08	October	16:30		Afternoon
3506	0	0	0	0	0	0	0	Spring	2011-10-08	October	17:30		Afternoon
3507	0	0	0	0	0	0	0	Spring	2011-10-08	October	18:00		Afternoon
3508	0	0	0	0	0	0	0	Spring	2011-10-08	October	18:30		Afternoon
3509	0	0	0	0	0	0	0	Spring	2011-10-08	October	19:00		Afternoon
3510	0	0	0	0	0	0	0	Spring	2011-10-08	October	19:30	19:16 set	Dusk
3511	0	0	0	0	0	0	0	Spring	2011-10-08	October	20:00		Dusk
3512	5	80	0	80	0	0	0	Spring	2011-10-08	October	20:30	20:30 end	Night
3513	3	48	0	48	0	0	0	Spring	2011-10-08	October	21:00		Night
3514	10	160	0	160	0	0	0	Spring	2011-10-08	October	21:30		Night
3515	1	16	0	16	0	0	0	Spring	2011-10-08	October	22:00		Night
3516	0	0	0	0	0	0	0	Spring	2011-10-08	October	22:30		Night
3517	0	0	0	0	0	0	0	Spring	2011-10-08	October	23:00		Night
3518	15	240	0	240	0	0	0	Spring	2011-10-08	October	23:30		Night
3520	0	0	0	0	0	0	0	Spring	2011-10-09	October	0:30		Night
3521	0	0	0	0	0	0	0	Spring	2011-10-09	October	1:00		Night
3522	0	0	0	0	0	0	0	Spring	2011-10-09	October	1:30		Night
3523	5	80	0	80	0	0	0	Spring	2011-10-09	October	2:00		Night
3525	0	0	0	0	0	0	0	Spring	2011-10-09	October	3:00		Night
3531	0	0	0	0	0	0	0	Spring	2011-10-09	October	6:00	6:08 rise	Dawn
3534	0	0	0	0	0	0	0	Spring	2011-10-09	October	7:30		Morning
3536	3	48	0	48	0	0	0	Spring	2011-10-09	October	8:30		Morning
3537	0	0	0	0	0	0	0	Spring	2011-10-09	October	9:00		Morning
3539	1	16	0	16	0	0	0	Spring	2011-10-09	October	10:00		Morning
3541	0	0	0	0	0	0	0	Spring	2011-10-09	October	11:00		Morning
3545	14	224	0	224	0	0	0	Spring	2011-10-09	October	13:00	12:42 transit	Afternoon
3547	0	0	0	0	0	0	0	Spring	2011-10-09	October	14:00		Afternoon
3552	4	64	0	64	0	0	0	Spring	2011-10-09	October	16:30		Afternoon
3554	8	128	0	128	0	0	0	Spring	2011-10-09	October	17:30		Afternoon
3557	6	96	0	96	0	0	0	Spring	2011-10-09	October	19:00		Afternoon
3567	5	80	0	80	0	0	0	Spring	2011-10-10	October	0:00		Night
3572	4	64	0	64	0	0	0	Spring	2011-10-10	October	2:30		Night
3574	0	0	0	0	0	0	0	Spring	2011-10-10	October	3:30		Night
3575	0	0	0	0	0	0	0	Spring	2011-10-10	October	4:00		Night
3576	0	0	0	0	0	0	0	Spring	2011-10-10	October	4:30		Night
3577	0	0	0	0	0	0	0	Spring	2011-10-10	October	5:00	4:52 begin	Dawn
3579	0	0	0	0	0	0	0	Spring	2011-10-10	October	6:00	6:06 rise	Dawn
3580	0	0	0	0	0	0	0	Spring	2011-10-10	October	6:30		Morning
3581	0	0	0	0	0	0	0	Spring	2011-10-10	October	7:00		Morning
3586	0	0	0	0	0	0	0	Spring	2011-10-10	October	9:30		Morning
3587	0	0	0	0	0	0	0	Spring	2011-10-10	October	10:00		Morning
3590	0	0	0	0	0	0	0	Spring	2011-10-10	October	11:30		Morning
3593	0	0	0	0	0	0	0	Spring	2011-10-10	October	13:00	12:42 transit	Afternoon
3595	0	0	0	0	0	0	0	Spring	2011-10-10	October	14:00		Afternoon
3597	0	0	0	0	0	0	0	Spring	2011-10-10	October	15:00		Afternoon
3599	0	0	0	0	0	0	0	Spring	2011-10-10	October	16:00		Afternoon
3601	0	0	0	0	0	0	0	Spring	2011-10-10	October	17:00		Afternoon
3602	0	0	0	0	0	0	0	Spring	2011-10-10	October	17:30		Afternoon
3603	0	0	0	0	0	0	0	Spring	2011-10-10	October	18:00		Afternoon
3604	0	0	0	0	0	0	0	Spring	2011-10-10	October	18:30		Afternoon
3605	0	0	0	0	0	0	0	Spring	2011-10-10	October	19:00		Afternoon
3608	0	0	0	0	0	0	0	Spring	2011-10-10	October	20:30	20:34 end	Dusk
3609	0	0	0	0	0	0	0	Spring	2011-10-10	October	21:00		Night
3610	0	0	0	0	0	0	0	Spring	2011-10-10	October	21:30		Night
3611	0	0	0	0	0	0	0	Spring	2011-10-10	October	22:00		Night
3612	0	0	0	0	0	0	0	Spring	2011-10-10	October	22:30		Night
3615	0	0	0	0	0	0	0	Spring	2011-10-11	October	0:00		Night
3619	0	0	0	0	0	0	0	Spring	2011-10-11	October	2:00		Night
3620	0	0	0	0	0	0	0	Spring	2011-10-11	October	2:30		Night
3621	0	0	0	0	0	0	0	Spring	2011-10-11	October	3:00		Night
3623	0	0	0	0	0	0	0	Spring	2011-10-11	October	4:00		Night
3626	0	0	0	0	0	0	0	Spring	2011-10-11	October	5:30		Dawn
3627	0	0	0	0	0	0	0	Spring	2011-10-11	October	6:00	6:04 rise	Dawn
3637	0	0	0	0	0	0	0	Spring	2011-10-11	October	11:00		Morning
3640	0	0	0	0	0	0	0	Spring	2011-10-11	October	12:30		Morning
3647	0	0	0	0	0	0	0	Spring	2011-10-11	October	16:00		Afternoon
3648	0	0	0	0	0	0	0	Spring	2011-10-11	October	16:30		Afternoon
3650	0	0	0	0	0	0	0	Spring	2011-10-11	October	17:30		Afternoon
3652	0	0	0	0	0	0	0	Spring	2011-10-11	October	18:30		Afternoon
3653	0	0	0	0	0	0	0	Spring	2011-10-11	October	19:00		Afternoon
3654	0	0	0	0	0	0	0	Spring	2011-10-11	October	19:30	19:21 set	Dusk
3655	0	0	0	0	0	0	0	Spring	2011-10-11	October	20:00		Dusk
3656	0	0	0	0	0	0	0	Spring	2011-10-11	October	20:30	20:36 end	Dusk
3657	0	0	0	0	0	0	0	Spring	2011-10-11	October	21:00		Night
3658	0	0	0	0	0	0	0	Spring	2011-10-11	October	21:30		Night
3659	0	0	0	0	0	0	0	Spring	2011-10-11	October	22:00		Night
3660	0	0	0	0	0	0	0	Spring	2011-10-11	October	22:30		Night
3661	0	0	0	0	0	0	0	Spring	2011-10-11	October	23:00		Night
3662	0	0	0	0	0	0	0	Spring	2011-10-11	October	23:30		Night
3663	0	0	0	0	0	0	0	Spring	2011-10-12	October	0:00		Night
3664	0	0	0	0	0	0	0	Spring	2011-10-12	October	0:30		Night
3665	0	0	0	0	0	0	0	Spring	2011-10-12	October	1:00		Night
3666	0	0	0	0	0	0	0	Spring	2011-10-12	October	1:30		Night
3667	0	0	0	0	0	0	0	Spring	2011-10-12	October	2:00		Night
3668	0	0	0	0	0	0	0	Spring	2011-10-12	October	2:30		Night
3669	0	0	0	0	0	0	0	Spring	2011-10-12	October	3:00		Night
3670	0	0	0	0	0	0	0	Spring	2011-10-12	October	3:30		Night
3671	0	0	0	0	0	0	0	Spring	2011-10-12	October	4:00		Night
3672	0	0	0	0	0	0	0	Spring	2011-10-12	October	4:30		Night
3673	0	0	0	0	0	0	0	Spring	2011-10-12	October	5:00	4:47 begin	Dawn
3675	0	0	0	0	0	0	0	Spring	2011-10-12	October	6:00	6:02 rise	Dawn
3676	0	0	0	0	0	0	0	Spring	2011-10-12	October	6:30		Morning
3677	0	0	0	0	0	0	0	Spring	2011-10-12	October	7:00		Morning
3678	0	0	0	0	0	0	0	Spring	2011-10-12	October	7:30		Morning
3679	0	0	0	0	0	0	0	Spring	2011-10-12	October	8:00		Morning
3680	0	0	0	0	0	0	0	Spring	2011-10-12	October	8:30		Morning
3681	0	0	0	0	0	0	0	Spring	2011-10-12	October	9:00		Morning
3682	0	0	0	0	0	0	0	Spring	2011-10-12	October	9:30		Morning
3683	0	0	0	0	0	0	0	Spring	2011-10-12	October	10:00		Morning
3685	0	0	0	0	0	0	0	Spring	2011-10-12	October	11:00		Morning
3687	0	0	0	0	0	0	0	Spring	2011-10-12	October	12:00		Morning
3688	0	0	0	0	0	0	0	Spring	2011-10-12	October	12:30		Morning
3689	0	0	0	0	0	0	0	Spring	2011-10-12	October	13:00	12:42 transit	Afternoon
3690	0	0	0	0	0	0	0	Spring	2011-10-12	October	13:30		Afternoon
3692	0	0	0	0	0	0	0	Spring	2011-10-12	October	14:30		Afternoon
3693	0	0	0	0	0	0	0	Spring	2011-10-12	October	15:00		Afternoon
3694	1	16	0	16	0	0	0	Spring	2011-10-12	October	15:30		Afternoon
3695	0	0	0	0	0	0	0	Spring	2011-10-12	October	16:00		Afternoon
3696	0	0	0	0	0	0	0	Spring	2011-10-12	October	16:30		Afternoon
3697	0	0	0	0	0	0	0	Spring	2011-10-12	October	17:00		Afternoon
3699	0	0	0	0	0	0	0	Spring	2011-10-12	October	18:00		Afternoon
3700	0	0	0	0	0	0	0	Spring	2011-10-12	October	18:30		Afternoon
3701	0	0	0	0	0	0	0	Spring	2011-10-12	October	19:00		Afternoon
3702	0	0	0	0	0	0	0	Spring	2011-10-12	October	19:30	19:23 set	Dusk
3703	0	0	0	0	0	0	0	Spring	2011-10-12	October	20:00		Dusk
3704	0	0	0	0	0	0	0	Spring	2011-10-12	October	20:30	20:38 end	Dusk
3705	0	0	0	0	0	0	0	Spring	2011-10-12	October	21:00		Night
3706	0	0	0	0	0	0	0	Spring	2011-10-12	October	21:30		Night
3707	0	0	0	0	0	0	0	Spring	2011-10-12	October	22:00		Night
3708	0	0	0	0	0	0	0	Spring	2011-10-12	October	22:30		Night
3709	0	0	0	0	0	0	0	Spring	2011-10-12	October	23:00		Night
3710	0	0	0	0	0	0	0	Spring	2011-10-12	October	23:30		Night
3711	0	0	0	0	0	0	0	Spring	2011-10-13	October	0:00		Night
3712	0	0	0	0	0	0	0	Spring	2011-10-13	October	0:30		Night
3713	0	0	0	0	0	0	0	Spring	2011-10-13	October	1:00		Night
3714	0	0	0	0	0	0	0	Spring	2011-10-13	October	1:30		Night
3715	0	0	0	0	0	0	0	Spring	2011-10-13	October	2:00		Night
3716	0	0	0	0	0	0	0	Spring	2011-10-13	October	2:30		Night
3717	0	0	0	0	0	0	0	Spring	2011-10-13	October	3:00		Night
3718	0	0	0	0	0	0	0	Spring	2011-10-13	October	3:30		Night
3719	0	0	0	0	0	0	0	Spring	2011-10-13	October	4:00		Night
3720	0	0	0	0	0	0	0	Spring	2011-10-13	October	4:30		Night
3722	0	0	0	0	0	0	0	Spring	2011-10-13	October	5:30		Dawn
3723	0	0	0	0	0	0	0	Spring	2011-10-13	October	6:00	5:59 rise	Morning
3724	0	0	0	0	0	0	0	Spring	2011-10-13	October	6:30		Morning
3727	0	0	0	0	0	0	0	Spring	2011-10-13	October	8:00		Morning
3728	0	0	0	0	0	0	0	Spring	2011-10-13	October	8:30		Morning
3729	0	0	0	0	0	0	0	Spring	2011-10-13	October	9:00		Morning
3730	1	16	0	16	0	0	0	Spring	2011-10-13	October	9:30		Morning
3731	0	0	0	0	0	0	0	Spring	2011-10-13	October	10:00		Morning
3732	0	0	0	0	0	0	0	Spring	2011-10-13	October	10:30		Morning
3733	0	0	0	0	0	0	0	Spring	2011-10-13	October	11:00		Morning
3734	0	0	0	0	0	0	0	Spring	2011-10-13	October	11:30		Morning
3735	0	0	0	0	0	0	0	Spring	2011-10-13	October	12:00		Morning
3737	0	0	0	0	0	0	0	Spring	2011-10-13	October	13:00	12:41 transit	Afternoon
3740	0	0	0	0	0	0	0	Spring	2011-10-13	October	14:30		Afternoon
3741	0	0	0	0	0	0	0	Spring	2011-10-13	October	15:00		Afternoon
3742	0	0	0	0	0	0	0	Spring	2011-10-13	October	15:30		Afternoon
3743	0	0	0	0	0	0	0	Spring	2011-10-13	October	16:00		Afternoon
3744	0	0	0	0	0	0	0	Spring	2011-10-13	October	16:30		Afternoon
3745	0	0	0	0	0	0	0	Spring	2011-10-13	October	17:00		Afternoon
3746	0	0	0	0	0	0	0	Spring	2011-10-13	October	17:30		Afternoon
3747	0	0	0	0	0	0	0	Spring	2011-10-13	October	18:00		Afternoon
3748	0	0	0	0	0	0	0	Spring	2011-10-13	October	18:30		Afternoon
3750	0	0	0	0	0	0	0	Spring	2011-10-13	October	19:30	19:24 set	Dusk
3751	0	0	0	0	0	0	0	Spring	2011-10-13	October	20:00		Dusk
3752	0	0	0	0	0	0	0	Spring	2011-10-13	October	20:30	20:40 end	Dusk
3753	0	0	0	0	0	0	0	Spring	2011-10-13	October	21:00		Night
3754	0	0	0	0	0	0	0	Spring	2011-10-13	October	21:30		Night
3755	0	0	0	0	0	0	0	Spring	2011-10-13	October	22:00		Night
3757	1	16	0	16	0	0	0	Spring	2011-10-13	October	23:00		Night
3758	2	32	0	32	0	0	0	Spring	2011-10-13	October	23:30		Night
3759	0	0	0	0	0	0	0	Spring	2011-10-14	October	0:00		Night
3760	0	0	0	0	0	0	0	Spring	2011-10-14	October	0:30		Night
3763	0	0	0	0	0	0	0	Spring	2011-10-14	October	2:00		Night
3764	12	192	0	192	0	0	0	Spring	2011-10-14	October	2:30		Night
3766	0	0	0	0	0	0	0	Spring	2011-10-14	October	3:30		Night
3767	0	0	0	0	0	0	0	Spring	2011-10-14	October	4:00		Night
3770	0	0	0	0	0	0	0	Spring	2011-10-14	October	5:30		Dawn
3771	0	0	0	0	0	0	0	Spring	2011-10-14	October	6:00	5:57 rise	Morning
3772	2	32	0	32	0	0	0	Spring	2011-10-14	October	6:30		Morning
3778	7	112	0	112	0	0	0	Spring	2011-10-14	October	9:30		Morning
3781	0	0	0	0	0	0	0	Spring	2011-10-14	October	11:00		Morning
3782	0	0	0	0	0	0	0	Spring	2011-10-14	October	11:30		Morning
3783	0	0	0	0	0	0	0	Spring	2011-10-14	October	12:00		Morning
3784	0	0	0	0	0	0	0	Spring	2011-10-14	October	12:30		Morning
3785	0	0	0	0	0	0	0	Spring	2011-10-14	October	13:00	12:41 transit	Afternoon
3786	0	0	0	0	0	0	0	Spring	2011-10-14	October	13:30		Afternoon
3787	0	0	0	0	0	0	0	Spring	2011-10-14	October	14:00		Afternoon
3789	0	0	0	0	0	0	0	Spring	2011-10-14	October	15:00		Afternoon
3790	0	0	0	0	0	0	0	Spring	2011-10-14	October	15:30		Afternoon
3792	0	0	0	0	0	0	0	Spring	2011-10-14	October	16:30		Afternoon
3793	0	0	0	0	0	0	0	Spring	2011-10-14	October	17:00		Afternoon
3794	0	0	0	0	0	0	0	Spring	2011-10-14	October	17:30		Afternoon
3795	0	0	0	0	0	0	0	Spring	2011-10-14	October	18:00		Afternoon
3796	0	0	0	0	0	0	0	Spring	2011-10-14	October	18:30		Afternoon
3797	0	0	0	0	0	0	0	Spring	2011-10-14	October	19:00		Afternoon
3798	0	0	0	0	0	0	0	Spring	2011-10-14	October	19:30	19:26 set	Dusk
3799	0	0	0	0	0	0	0	Spring	2011-10-14	October	20:00		Dusk
3801	0	0	0	0	0	0	0	Spring	2011-10-14	October	21:00		Night
3802	0	0	0	0	0	0	0	Spring	2011-10-14	October	21:30		Night
3803	0	0	0	0	0	0	0	Spring	2011-10-14	October	22:00		Night
3804	0	0	0	0	0	0	0	Spring	2011-10-14	October	22:30		Night
3805	0	0	0	0	0	0	0	Spring	2011-10-14	October	23:00		Night
3806	0	0	0	0	0	0	0	Spring	2011-10-14	October	23:30		Night
3808	0	0	0	0	0	0	0	Spring	2011-10-15	October	0:30		Night
3809	0	0	0	0	0	0	0	Spring	2011-10-15	October	1:00		Night
3811	0	0	0	0	0	0	0	Spring	2011-10-15	October	2:00		Night
3812	0	0	0	0	0	0	0	Spring	2011-10-15	October	2:30		Night
3813	0	0	0	0	0	0	0	Spring	2011-10-15	October	3:00		Night
3814	0	0	0	0	0	0	0	Spring	2011-10-15	October	3:30		Night
3815	0	0	0	0	0	0	0	Spring	2011-10-15	October	4:00		Night
3816	0	0	0	0	0	0	0	Spring	2011-10-15	October	4:30	4:40 begin	Night
3817	0	0	0	0	0	0	0	Spring	2011-10-15	October	5:00		Dawn
3818	0	0	0	0	0	0	0	Spring	2011-10-15	October	5:30		Dawn
3819	0	0	0	0	0	0	0	Spring	2011-10-15	October	6:00	5:55 rise	Morning
3820	0	0	0	0	0	0	0	Spring	2011-10-15	October	6:30		Morning
3821	0	0	0	0	0	0	0	Spring	2011-10-15	October	7:00		Morning
3822	0	0	0	0	0	0	0	Spring	2011-10-15	October	7:30		Morning
3823	0	0	0	0	0	0	0	Spring	2011-10-15	October	8:00		Morning
3824	0	0	0	0	0	0	0	Spring	2011-10-15	October	8:30		Morning
3825	1	16	0	16	0	0	0	Spring	2011-10-15	October	9:00		Morning
3827	0	0	0	0	0	0	0	Spring	2011-10-15	October	10:00		Morning
3828	0	0	0	0	0	0	0	Spring	2011-10-15	October	10:30		Morning
3829	0	0	0	0	0	0	0	Spring	2011-10-15	October	11:00		Morning
3830	0	0	0	0	0	0	0	Spring	2011-10-15	October	11:30		Morning
3833	0	0	0	0	0	0	0	Spring	2011-10-15	October	13:00	12:41 transit	Morning
3836	0	0	0	0	0	0	0	Spring	2011-10-15	October	14:30		Afternoon
3837	0	0	0	0	0	0	0	Spring	2011-10-15	October	15:00		Afternoon
3839	0	0	0	0	0	0	0	Spring	2011-10-15	October	16:00		Afternoon
3840	0	0	0	0	0	0	0	Spring	2011-10-15	October	16:30		Afternoon
3841	0	0	0	0	0	0	0	Spring	2011-10-15	October	17:00		Afternoon
3842	0	0	0	0	0	0	0	Spring	2011-10-15	October	17:30		Afternoon
3843	0	0	0	0	0	0	0	Spring	2011-10-15	October	18:00		Afternoon
3846	0	0	0	0	0	0	0	Spring	2011-10-15	October	19:30	19:28 set	Dusk
3847	0	0	0	0	0	0	0	Spring	2011-10-15	October	20:00		Dusk
3848	0	0	0	0	0	0	0	Spring	2011-10-15	October	20:30	20:44 end	Dusk
3849	0	0	0	0	0	0	0	Spring	2011-10-15	October	21:00		Night
3850	0	0	0	0	0	0	0	Spring	2011-10-15	October	21:30		Night
3851	0	0	0	0	0	0	0	Spring	2011-10-15	October	22:00		Night
3853	0	0	0	0	0	0	0	Spring	2011-10-15	October	23:00		Night
3854	0	0	0	0	0	0	0	Spring	2011-10-15	October	23:30		Night
3855	0	0	0	0	0	0	0	Spring	2011-10-16	October	0:00		Night
3856	0	0	0	0	0	0	0	Spring	2011-10-16	October	0:30		Night
3858	0	0	0	0	0	0	0	Spring	2011-10-16	October	1:30		Night
3860	0	0	0	0	0	0	0	Spring	2011-10-16	October	2:30		Night
3861	0	0	0	0	0	0	0	Spring	2011-10-16	October	3:00		Night
3862	0	0	0	0	0	0	0	Spring	2011-10-16	October	3:30		Night
3863	0	0	0	0	0	0	0	Spring	2011-10-16	October	4:00		Night
3864	0	0	0	0	0	0	0	Spring	2011-10-16	October	4:30	4:37 begin	Night
3865	0	0	0	0	0	0	0	Spring	2011-10-16	October	5:00		Dawn
3866	0	0	0	0	0	0	0	Spring	2011-10-16	October	5:30		Dawn
3867	0	0	0	0	0	0	0	Spring	2011-10-16	October	6:00	5:53 rise	Morning
3868	0	0	0	0	0	0	0	Spring	2011-10-16	October	6:30		Morning
3869	0	0	0	0	0	0	0	Spring	2011-10-16	October	7:00		Morning
3870	0	0	0	0	0	0	0	Spring	2011-10-16	October	7:30		Morning
3871	0	0	0	0	0	0	0	Spring	2011-10-16	October	8:00		Morning
3872	0	0	0	0	0	0	0	Spring	2011-10-16	October	8:30		Morning
3873	0	0	0	0	0	0	0	Spring	2011-10-16	October	9:00		Morning
3874	0	0	0	0	0	0	0	Spring	2011-10-16	October	9:30		Morning
3875	0	0	0	0	0	0	0	Spring	2011-10-16	October	10:00		Morning
3876	0	0	0	0	0	0	0	Spring	2011-10-16	October	10:30		Morning
3877	0	0	0	0	0	0	0	Spring	2011-10-16	October	11:00		Morning
3878	0	0	0	0	0	0	0	Spring	2011-10-16	October	11:30		Morning
3881	0	0	0	0	0	0	0	Spring	2011-10-16	October	13:00	12:41 transit	Morning
3882	0	0	0	0	0	0	0	Spring	2011-10-16	October	13:30		Afternoon
3883	0	0	0	0	0	0	0	Spring	2011-10-16	October	14:00		Afternoon
3884	0	0	0	0	0	0	0	Spring	2011-10-16	October	14:30		Afternoon
3886	0	0	0	0	0	0	0	Spring	2011-10-16	October	15:30		Afternoon
3887	0	0	0	0	0	0	0	Spring	2011-10-16	October	16:00		Afternoon
3888	0	0	0	0	0	0	0	Spring	2011-10-16	October	16:30		Afternoon
3889	0	0	0	0	0	0	0	Spring	2011-10-16	October	17:00		Afternoon
3890	0	0	0	0	0	0	0	Spring	2011-10-16	October	17:30		Afternoon
3891	0	0	0	0	0	0	0	Spring	2011-10-16	October	18:00		Afternoon
3892	0	0	0	0	0	0	0	Spring	2011-10-16	October	18:30		Afternoon
3895	0	0	0	0	0	0	0	Spring	2011-10-16	October	20:00		Dusk
3896	0	0	0	0	0	0	0	Spring	2011-10-16	October	20:30	20:46 end	Dusk
3897	0	0	0	0	0	0	0	Spring	2011-10-16	October	21:00		Night
3900	0	0	0	0	0	0	0	Spring	2011-10-16	October	22:30		Night
3901	0	0	0	0	0	0	0	Spring	2011-10-16	October	23:00		Night
3902	0	0	0	0	0	0	0	Spring	2011-10-16	October	23:30		Night
3903	0	0	0	0	0	0	0	Spring	2011-10-17	October	0:00		Night
3904	0	0	0	0	0	0	0	Spring	2011-10-17	October	0:30		Night
3905	0	0	0	0	0	0	0	Spring	2011-10-17	October	1:00		Night
3906	0	0	0	0	0	0	0	Spring	2011-10-17	October	1:30		Night
3907	0	0	0	0	0	0	0	Spring	2011-10-17	October	2:00		Night
3908	0	0	0	0	0	0	0	Spring	2011-10-17	October	2:30		Night
3910	0	0	0	0	0	0	0	Spring	2011-10-17	October	3:30		Night
3911	0	0	0	0	0	0	0	Spring	2011-10-17	October	4:00		Night
3912	0	0	0	0	0	0	0	Spring	2011-10-17	October	4:30	4:35 begin	Night
3913	0	0	0	0	0	0	0	Spring	2011-10-17	October	5:00		Dawn
3914	0	0	0	0	0	0	0	Spring	2011-10-17	October	5:30		Dawn
3915	0	0	0	0	0	0	0	Spring	2011-10-17	October	6:00	5:51 rise	Morning
3917	0	0	0	0	0	0	0	Spring	2011-10-17	October	7:00		Morning
3919	0	0	0	0	0	0	0	Spring	2011-10-17	October	8:00		Morning
3920	0	0	0	0	0	0	0	Spring	2011-10-17	October	8:30		Morning
3921	0	0	0	0	0	0	0	Spring	2011-10-17	October	9:00		Morning
3922	0	0	0	0	0	0	0	Spring	2011-10-17	October	9:30		Morning
3923	0	0	0	0	0	0	0	Spring	2011-10-17	October	10:00		Morning
3924	0	0	0	0	0	0	0	Spring	2011-10-17	October	10:30		Morning
3925	0	0	0	0	0	0	0	Spring	2011-10-17	October	11:00		Morning
3926	0	0	0	0	0	0	0	Spring	2011-10-17	October	11:30		Morning
3927	0	0	0	0	0	0	0	Spring	2011-10-17	October	12:00		Morning
3928	0	0	0	0	0	0	0	Spring	2011-10-17	October	12:30		Morning
3929	0	0	0	0	0	0	0	Spring	2011-10-17	October	13:00	12:40 transit	Morning
3930	0	0	0	0	0	0	0	Spring	2011-10-17	October	13:30		Afternoon
3931	0	0	0	0	0	0	0	Spring	2011-10-17	October	14:00		Afternoon
3932	0	0	0	0	0	0	0	Spring	2011-10-17	October	14:30		Afternoon
3933	0	0	0	0	0	0	0	Spring	2011-10-17	October	15:00		Afternoon
3934	0	0	0	0	0	0	0	Spring	2011-10-17	October	15:30		Afternoon
3935	0	0	0	0	0	0	0	Spring	2011-10-17	October	16:00		Afternoon
3936	0	0	0	0	0	0	0	Spring	2011-10-17	October	16:30		Afternoon
3937	0	0	0	0	0	0	0	Spring	2011-10-17	October	17:00		Afternoon
3938	0	0	0	0	0	0	0	Spring	2011-10-17	October	17:30		Afternoon
3939	0	0	0	0	0	0	0	Spring	2011-10-17	October	18:00		Afternoon
3940	0	0	0	0	0	0	0	Spring	2011-10-17	October	18:30		Afternoon
3941	0	0	0	0	0	0	0	Spring	2011-10-17	October	19:00		Afternoon
3942	0	0	0	0	0	0	0	Spring	2011-10-17	October	19:30	19:31 set	Dusk
3943	0	0	0	0	0	0	0	Spring	2011-10-17	October	20:00		Dusk
3945	0	0	0	0	0	0	0	Spring	2011-10-17	October	21:00	20:48 end	Night
3947	0	0	0	0	0	0	0	Spring	2011-10-17	October	22:00		Night
3948	0	0	0	0	0	0	0	Spring	2011-10-17	October	22:30		Night
3950	0	0	0	0	0	0	0	Spring	2011-10-17	October	23:30		Night
3951	0	0	0	0	0	0	0	Spring	2011-10-18	October	0:00		Night
3952	0	0	0	0	0	0	0	Spring	2011-10-18	October	0:30		Night
3953	0	0	0	0	0	0	0	Spring	2011-10-18	October	1:00		Night
3954	0	0	0	0	0	0	0	Spring	2011-10-18	October	1:30		Night
3955	0	0	0	0	0	0	0	Spring	2011-10-18	October	2:00		Night
3956	0	0	0	0	0	0	0	Spring	2011-10-18	October	2:30		Night
3957	0	0	0	0	0	0	0	Spring	2011-10-18	October	3:00		Night
3958	0	0	0	0	0	0	0	Spring	2011-10-18	October	3:30		Night
3960	0	0	0	0	0	0	0	Spring	2011-10-18	October	4:30	4:32 begin	Dawn
3961	0	0	0	0	0	0	0	Spring	2011-10-18	October	5:00		Dawn
3962	0	0	0	0	0	0	0	Spring	2011-10-18	October	5:30		Dawn
3963	0	0	0	0	0	0	0	Spring	2011-10-18	October	6:00	5:49 rise	Morning
3964	0	0	0	0	0	0	0	Spring	2011-10-18	October	6:30		Morning
3965	0	0	0	0	0	0	0	Spring	2011-10-18	October	7:00		Morning
3966	0	0	0	0	0	0	0	Spring	2011-10-18	October	7:30		Morning
3967	0	0	0	0	0	0	0	Spring	2011-10-18	October	8:00		Morning
3968	0	0	0	0	0	0	0	Spring	2011-10-18	October	8:30		Morning
3969	0	0	0	0	0	0	0	Spring	2011-10-18	October	9:00		Morning
3970	0	0	0	0	0	0	0	Spring	2011-10-18	October	9:30		Morning
3971	0	0	0	0	0	0	0	Spring	2011-10-18	October	10:00		Morning
3972	0	0	0	0	0	0	0	Spring	2011-10-18	October	10:30		Morning
3973	0	0	0	0	0	0	0	Spring	2011-10-18	October	11:00		Morning
3974	0	0	0	0	0	0	0	Spring	2011-10-18	October	11:30		Morning
3975	0	0	0	0	0	0	0	Spring	2011-10-18	October	12:00		Morning
3976	0	0	0	0	0	0	0	Spring	2011-10-18	October	12:30		Morning
3977	0	0	0	0	0	0	0	Spring	2011-10-18	October	13:00	12:40 transit	Morning
3978	0	0	0	0	0	0	0	Spring	2011-10-18	October	13:30		Afternoon
3979	0	0	0	0	0	0	0	Spring	2011-10-18	October	14:00		Afternoon
3980	1	16	0	16	0	0	0	Spring	2011-10-18	October	14:30		Afternoon
3981	0	0	0	0	0	0	0	Spring	2011-10-18	October	15:00		Afternoon
3982	0	0	0	0	0	0	0	Spring	2011-10-18	October	15:30		Afternoon
3984	0	0	0	0	0	0	0	Spring	2011-10-18	October	16:30		Afternoon
3985	0	0	0	0	0	0	0	Spring	2011-10-18	October	17:00		Afternoon
3986	0	0	0	0	0	0	0	Spring	2011-10-18	October	17:30		Afternoon
3987	0	0	0	0	0	0	0	Spring	2011-10-18	October	18:00		Afternoon
3988	0	0	0	0	0	0	0	Spring	2011-10-18	October	18:30		Afternoon
3989	0	0	0	0	0	0	0	Spring	2011-10-18	October	19:00		Afternoon
3990	0	0	0	0	0	0	0	Spring	2011-10-18	October	19:30	19:33 set	Afternoon
3991	0	0	0	0	0	0	0	Spring	2011-10-18	October	20:00		Dusk
3992	0	0	0	0	0	0	0	Spring	2011-10-18	October	20:30		Dusk
3993	0	0	0	0	0	0	0	Spring	2011-10-18	October	21:00	20:50 end	Night
3994	0	0	0	0	0	0	0	Spring	2011-10-18	October	21:30		Night
3995	0	0	0	0	0	0	0	Spring	2011-10-18	October	22:00		Night
3996	0	0	0	0	0	0	0	Spring	2011-10-18	October	22:30		Night
3997	0	0	0	0	0	0	0	Spring	2011-10-18	October	23:00		Night
4002	0	0	0	0	0	0	0	Spring	2011-10-19	October	1:30		Night
4004	0	0	0	0	0	0	0	Spring	2011-10-19	October	2:30		Night
4005	0	0	0	0	0	0	0	Spring	2011-10-19	October	3:00		Night
4006	1	16	0	16	0	0	0	Spring	2011-10-19	October	3:30		Night
4008	0	0	0	0	0	0	0	Spring	2011-10-19	October	4:30	4:30 begin	Dawn
4010	0	0	0	0	0	0	0	Spring	2011-10-19	October	5:30		Dawn
4012	0	0	0	0	0	0	0	Spring	2011-10-19	October	6:30		Morning
4013	0	0	0	0	0	0	0	Spring	2011-10-19	October	7:00		Morning
4015	0	0	0	0	0	0	0	Spring	2011-10-19	October	8:00		Morning
4017	0	0	0	0	0	0	0	Spring	2011-10-19	October	9:00		Morning
4019	0	0	0	0	0	0	0	Spring	2011-10-19	October	10:00		Morning
4020	0	0	0	0	0	0	0	Spring	2011-10-19	October	10:30		Morning
4021	0	0	0	0	0	0	0	Spring	2011-10-19	October	11:00		Morning
4022	0	0	0	0	0	0	0	Spring	2011-10-19	October	11:30		Morning
4023	0	0	0	0	0	0	0	Spring	2011-10-19	October	12:00		Morning
4025	0	0	0	0	0	0	0	Spring	2011-10-19	October	13:00	12:40 transit	Morning
4026	0	0	0	0	0	0	0	Spring	2011-10-19	October	13:30		Afternoon
4027	0	0	0	0	0	0	0	Spring	2011-10-19	October	14:00		Afternoon
4028	0	0	0	0	0	0	0	Spring	2011-10-19	October	14:30		Afternoon
4030	0	0	0	0	0	0	0	Spring	2011-10-19	October	15:30		Afternoon
4031	0	0	0	0	0	0	0	Spring	2011-10-19	October	16:00		Afternoon
4032	0	0	0	0	0	0	0	Spring	2011-10-19	October	16:30		Afternoon
4033	0	0	0	0	0	0	0	Spring	2011-10-19	October	17:00		Afternoon
4034	0	0	0	0	0	0	0	Spring	2011-10-19	October	17:30		Afternoon
4037	0	0	0	0	0	0	0	Spring	2011-10-19	October	19:00		Afternoon
4038	0	0	0	0	0	0	0	Spring	2011-10-19	October	19:30	19:34 set	Afternoon
4045	0	0	0	0	0	0	0	Spring	2011-10-19	October	23:00		Night
4047	0	0	0	0	0	0	0	Spring	2011-10-20	October	0:00		Night
4050	0	0	0	0	0	0	0	Spring	2011-10-20	October	1:30		Night
4051	0	0	0	0	0	0	0	Spring	2011-10-20	October	2:00		Night
4052	0	0	0	0	0	0	0	Spring	2011-10-20	October	2:30		Night
4053	0	0	0	0	0	0	0	Spring	2011-10-20	October	3:00		Night
4054	0	0	0	0	0	0	0	Spring	2011-10-20	October	3:30		Night
4055	0	0	0	0	0	0	0	Spring	2011-10-20	October	4:00		Night
4056	0	0	0	0	0	0	0	Spring	2011-10-20	October	4:30	4:27 begin	Dawn
4057	0	0	0	0	0	0	0	Spring	2011-10-20	October	5:00		Dawn
4058	0	0	0	0	0	0	0	Spring	2011-10-20	October	5:30	5:45 rise	Dawn
4059	0	0	0	0	0	0	0	Spring	2011-10-20	October	6:00		Morning
4060	0	0	0	0	0	0	0	Spring	2011-10-20	October	6:30		Morning
4061	0	0	0	0	0	0	0	Spring	2011-10-20	October	7:00		Morning
4064	0	0	0	0	0	0	0	Spring	2011-10-20	October	8:30		Morning
4068	0	0	0	0	0	0	0	Spring	2011-10-20	October	10:30		Morning
4070	0	0	0	0	0	0	0	Spring	2011-10-20	October	11:30		Morning
4077	0	0	0	0	0	0	0	Spring	2011-10-20	October	15:00		Afternoon
4082	0	0	0	0	0	0	0	Spring	2011-10-20	October	17:30		Afternoon
4083	0	0	0	0	0	0	0	Spring	2011-10-20	October	18:00		Afternoon
4084	0	0	0	0	0	0	0	Spring	2011-10-20	October	18:30		Afternoon
4085	0	0	0	0	0	0	0	Spring	2011-10-20	October	19:00		Afternoon
4089	0	0	0	0	0	0	0	Spring	2011-10-20	October	21:00	20:54 end	Night
4092	0	0	0	0	0	0	0	Spring	2011-10-20	October	22:30		Night
4095	0	0	0	0	0	0	0	Spring	2011-10-21	October	0:00		Night
4096	0	0	0	0	0	0	0	Spring	2011-10-21	October	0:30		Night
4097	0	0	0	0	0	0	0	Spring	2011-10-21	October	1:00		Night
4098	0	0	0	0	0	0	0	Spring	2011-10-21	October	1:30		Night
4099	0	0	0	0	0	0	0	Spring	2011-10-21	October	2:00		Night
4100	0	0	0	0	0	0	0	Spring	2011-10-21	October	2:30		Night
4101	0	0	0	0	0	0	0	Spring	2011-10-21	October	3:00		Night
4103	0	0	0	0	0	0	0	Spring	2011-10-21	October	4:00		Night
4104	0	0	0	0	0	0	0	Spring	2011-10-21	October	4:30	4:25 begin	Dawn
4105	0	0	0	0	0	0	0	Spring	2011-10-21	October	5:00		Dawn
4107	0	0	0	0	0	0	0	Spring	2011-10-21	October	6:00	5:43 rise	Morning
4108	0	0	0	0	0	0	0	Spring	2011-10-21	October	6:30		Morning
4109	0	0	0	0	0	0	0	Spring	2011-10-21	October	7:00		Morning
4111	0	0	0	0	0	0	0	Spring	2011-10-21	October	8:00		Morning
4112	0	0	0	0	0	0	0	Spring	2011-10-21	October	8:30		Morning
4113	0	0	0	0	0	0	0	Spring	2011-10-21	October	9:00		Morning
4114	0	0	0	0	0	0	0	Spring	2011-10-21	October	9:30		Morning
4115	0	0	0	0	0	0	0	Spring	2011-10-21	October	10:00		Morning
4116	0	0	0	0	0	0	0	Spring	2011-10-21	October	10:30		Morning
4117	0	0	0	0	0	0	0	Spring	2011-10-21	October	11:00		Morning
4118	0	0	0	0	0	0	0	Spring	2011-10-21	October	11:30		Morning
4120	0	0	0	0	0	0	0	Spring	2011-10-21	October	12:30		Morning
4122	0	0	0	0	0	0	0	Spring	2011-10-21	October	13:30		Afternoon
4123	0	0	0	0	0	0	0	Spring	2011-10-21	October	14:00		Afternoon
4127	0	0	0	0	0	0	0	Spring	2011-10-21	October	16:00		Afternoon
4128	0	0	0	0	0	0	0	Spring	2011-10-21	October	16:30		Afternoon
4129	0	0	0	0	0	0	0	Spring	2011-10-21	October	17:00		Afternoon
4130	0	0	0	0	0	0	0	Spring	2011-10-21	October	17:30		Afternoon
4131	0	0	0	0	0	0	0	Spring	2011-10-21	October	18:00		Afternoon
4133	0	0	0	0	0	0	0	Spring	2011-10-21	October	19:00		Afternoon
4134	0	0	0	0	0	0	0	Spring	2011-10-21	October	19:30	19:38 set	Afternoon
4137	0	0	0	0	0	0	0	Spring	2011-10-21	October	21:00	20:56 end	Night
4138	0	0	0	0	0	0	0	Spring	2011-10-21	October	21:30		Night
4139	0	0	0	0	0	0	0	Spring	2011-10-21	October	22:00		Night
4140	0	0	0	0	0	0	0	Spring	2011-10-21	October	22:30		Night
4144	0	0	0	0	0	0	0	Spring	2011-10-22	October	0:30		Night
4146	0	0	0	0	0	0	0	Spring	2011-10-22	October	1:30		Night
4147	0	0	0	0	0	0	0	Spring	2011-10-22	October	2:00		Night
4148	0	0	0	0	0	0	0	Spring	2011-10-22	October	2:30		Night
4149	0	0	0	0	0	0	0	Spring	2011-10-22	October	3:00		Night
4150	0	0	0	0	0	0	0	Spring	2011-10-22	October	3:30		Night
4151	0	0	0	0	0	0	0	Spring	2011-10-22	October	4:00		Night
4152	0	0	0	0	0	0	0	Spring	2011-10-22	October	4:30	4:23 begin	Dawn
4153	0	0	0	0	0	0	0	Spring	2011-10-22	October	5:00		Dawn
4154	0	0	0	0	0	0	0	Spring	2011-10-22	October	5:30	5:41 rise	Dawn
4155	0	0	0	0	0	0	0	Spring	2011-10-22	October	6:00		Morning
4156	0	0	0	0	0	0	0	Spring	2011-10-22	October	6:30		Morning
4161	4	64	0	64	0	0	0	Spring	2011-10-22	October	9:00		Morning
4163	0	0	0	0	0	0	0	Spring	2011-10-22	October	10:00		Morning
4164	0	0	0	0	0	0	0	Spring	2011-10-22	October	10:30		Morning
4172	0	0	0	0	0	0	0	Spring	2011-10-22	October	14:30		Afternoon
4173	0	0	0	0	0	0	0	Spring	2011-10-22	October	15:00		Afternoon
4174	1	16	0	16	0	0	0	Spring	2011-10-22	October	15:30		Afternoon
4175	0	0	0	0	0	0	0	Spring	2011-10-22	October	16:00		Afternoon
4176	0	0	0	0	0	0	0	Spring	2011-10-22	October	16:30		Afternoon
4178	0	0	0	0	0	0	0	Spring	2011-10-22	October	17:30		Afternoon
4180	0	0	0	0	0	0	0	Spring	2011-10-22	October	18:30		Afternoon
4183	0	0	0	0	0	0	0	Spring	2011-10-22	October	20:00		Dusk
4185	0	0	0	0	0	0	0	Spring	2011-10-22	October	21:00	20:58 end	Night
4186	0	0	0	0	0	0	0	Spring	2011-10-22	October	21:30		Night
4188	0	0	0	0	0	0	0	Spring	2011-10-22	October	22:30		Night
4189	2	32	0	32	0	0	0	Spring	2011-10-22	October	23:00		Night
4190	0	0	0	0	0	0	0	Spring	2011-10-22	October	23:30		Night
4191	0	0	0	0	0	0	0	Spring	2011-10-23	October	0:00		Night
4193	0	0	0	0	0	0	0	Spring	2011-10-23	October	1:00		Night
4206	0	0	0	0	0	0	0	Spring	2011-10-23	October	7:30		Morning
4221	0	0	0	0	0	0	0	Spring	2011-10-23	October	15:00		Afternoon
4223	0	0	0	0	0	0	0	Spring	2011-10-23	October	16:00		Afternoon
4234	0	0	0	0	0	0	0	Spring	2011-10-23	October	21:30		Night
4236	0	0	0	0	0	0	0	Spring	2011-10-23	October	22:30		Night
4238	10	160	0	160	0	0	0	Spring	2011-10-23	October	23:30		Night
4244	4	64	0	64	0	0	0	Spring	2011-10-24	October	2:30		Night
4247	1	16	0	16	0	0	0	Spring	2011-10-24	October	4:00		Night
4250	2	32	0	32	0	0	0	Spring	2011-10-24	October	5:30	5:37 rise	Dawn
4255	5	80	0	80	0	0	0	Spring	2011-10-24	October	8:00		Morning
4263	0	0	0	0	0	0	0	Spring	2011-10-24	October	12:00		Morning
4264	0	0	0	0	0	0	0	Spring	2011-10-24	October	12:30	12:39 transit	Morning
4265	0	0	0	0	0	0	0	Spring	2011-10-24	October	13:00		Afternoon
4267	3	48	0	48	0	0	0	Spring	2011-10-24	October	14:00		Afternoon
4268	0	0	0	0	0	0	0	Spring	2011-10-24	October	14:30		Afternoon
4271	0	0	0	0	0	0	0	Spring	2011-10-24	October	16:00		Afternoon
4283	0	0	0	0	0	0	0	Spring	2011-10-24	October	22:00		Night
4290	3	48	0	48	0	0	0	Spring	2011-10-25	October	1:30		Night
4294	8	128	0	128	0	0	0	Spring	2011-10-25	October	3:30		Night
4298	0	0	0	0	0	0	0	Spring	2011-10-25	October	5:30	5:35 rise	Dawn
4300	0	0	0	0	0	0	0	Spring	2011-10-25	October	6:30		Morning
4313	6	96	0	96	0	0	0	Spring	2011-10-25	October	13:00		Afternoon
4327	3	48	0	48	0	0	0	Spring	2011-10-25	October	20:00	19:45 set	Dusk
4328	0	0	0	0	0	0	0	Spring	2011-10-25	October	20:30		Dusk
4331	0	0	0	0	0	0	0	Spring	2011-10-25	October	22:00		Night
4332	0	0	0	0	0	0	0	Spring	2011-10-25	October	22:30		Night
4337	1	16	0	16	0	0	0	Spring	2011-10-26	October	1:00		Night
4347	0	0	0	0	0	0	0	Spring	2011-10-26	October	6:00		Morning
4350	0	0	0	0	0	0	0	Spring	2011-10-26	October	7:30		Morning
4353	0	0	0	0	0	0	0	Spring	2011-10-26	October	9:00		Morning
4354	0	0	0	0	0	0	0	Spring	2011-10-26	October	9:30		Morning
4356	0	0	0	0	0	0	0	Spring	2011-10-26	October	10:30		Morning
4357	0	0	0	0	0	0	0	Spring	2011-10-26	October	11:00		Morning
4360	0	0	0	0	0	0	0	Spring	2011-10-26	October	12:30		Morning
4364	0	0	0	0	0	0	0	Spring	2011-10-26	October	14:30		Afternoon
4365	0	0	0	0	0	0	0	Spring	2011-10-26	October	15:00		Afternoon
4366	0	0	0	0	0	0	0	Spring	2011-10-26	October	15:30		Afternoon
4367	0	0	0	0	0	0	0	Spring	2011-10-26	October	16:00		Afternoon
4368	0	0	0	0	0	0	0	Spring	2011-10-26	October	16:30		Afternoon
4370	0	0	0	0	0	0	0	Spring	2011-10-26	October	17:30		Afternoon
4371	0	0	0	0	0	0	0	Spring	2011-10-26	October	18:00		Afternoon
4372	0	0	0	0	0	0	0	Spring	2011-10-26	October	18:30		Afternoon
4373	0	0	0	0	0	0	0	Spring	2011-10-26	October	19:00		Afternoon
4374	0	0	0	0	0	0	0	Spring	2011-10-26	October	19:30		Afternoon
4377	0	0	0	0	0	0	0	Spring	2011-10-26	October	21:00	21:07 end	Dusk
4378	0	0	0	0	0	0	0	Spring	2011-10-26	October	21:30		Night
4380	0	0	0	0	0	0	0	Spring	2011-10-26	October	22:30		Night
4382	0	0	0	0	0	0	0	Spring	2011-10-26	October	23:30		Night
4387	3	48	0	48	0	0	0	Spring	2011-10-27	October	2:00		Night
4396	0	0	0	0	0	0	0	Spring	2011-10-27	October	6:30		Morning
4411	0	0	0	0	0	0	0	Spring	2011-10-27	October	14:00		Afternoon
4418	0	0	0	0	0	0	0	Spring	2011-10-27	October	17:30		Afternoon
4419	0	0	0	0	0	0	0	Spring	2011-10-27	October	18:00		Afternoon
4433	0	0	0	0	0	0	0	Spring	2011-10-28	October	1:00		Night
4434	0	0	0	0	0	0	0	Spring	2011-10-28	October	1:30		Night
4437	0	0	0	0	0	0	0	Spring	2011-10-28	October	3:00		Night
4438	0	0	0	0	0	0	0	Spring	2011-10-28	October	3:30		Night
4439	0	0	0	0	0	0	0	Spring	2011-10-28	October	4:00	4:08 begin	Night
4440	0	0	0	0	0	0	0	Spring	2011-10-28	October	4:30		Dawn
4442	0	0	0	0	0	0	0	Spring	2011-10-28	October	5:30	5:29 rise	Morning
4443	0	0	0	0	0	0	0	Spring	2011-10-28	October	6:00		Morning
4444	0	0	0	0	0	0	0	Spring	2011-10-28	October	6:30		Morning
4445	0	0	0	0	0	0	0	Spring	2011-10-28	October	7:00		Morning
4446	0	0	0	0	0	0	0	Spring	2011-10-28	October	7:30		Morning
4448	0	0	0	0	0	0	0	Spring	2011-10-28	October	8:30		Morning
4449	0	0	0	0	0	0	0	Spring	2011-10-28	October	9:00		Morning
4452	1	16	0	16	0	0	0	Spring	2011-10-28	October	10:30		Morning
4453	0	0	0	0	0	0	0	Spring	2011-10-28	October	11:00		Morning
4454	0	0	0	0	0	0	0	Spring	2011-10-28	October	11:30		Morning
4455	0	0	0	0	0	0	0	Spring	2011-10-28	October	12:00		Morning
4460	0	0	0	0	0	0	0	Spring	2011-10-28	October	14:30		Afternoon
4462	0	0	0	0	0	0	0	Spring	2011-10-28	October	15:30		Afternoon
4464	0	0	0	0	0	0	0	Spring	2011-10-28	October	16:30		Afternoon
4465	0	0	0	0	0	0	0	Spring	2011-10-28	October	17:00		Afternoon
4466	0	0	0	0	0	0	0	Spring	2011-10-28	October	17:30		Afternoon
4470	3	48	0	48	0	0	0	Spring	2011-10-28	October	19:30		Afternoon
4471	1	16	0	16	0	0	0	Spring	2011-10-28	October	20:00	19:50 set	Dusk
4473	0	0	0	0	0	0	0	Spring	2011-10-28	October	21:00	21:11 end	Dusk
4476	0	0	0	0	0	0	0	Spring	2011-10-28	October	22:30		Night
4478	0	0	0	0	0	0	0	Spring	2011-10-28	October	23:30		Night
4480	6	96	0	96	0	0	0	Spring	2011-10-29	October	0:30		Night
4483	0	0	0	0	0	0	0	Spring	2011-10-29	October	2:00		Night
4484	0	0	0	0	0	0	0	Spring	2011-10-29	October	2:30		Night
4485	0	0	0	0	0	0	0	Spring	2011-10-29	October	3:00		Night
4486	0	0	0	0	0	0	0	Spring	2011-10-29	October	3:30		Night
4487	0	0	0	0	0	0	0	Spring	2011-10-29	October	4:00	4:06 begin	Night
4488	0	0	0	0	0	0	0	Spring	2011-10-29	October	4:30		Dawn
4489	0	0	0	0	0	0	0	Spring	2011-10-29	October	5:00		Dawn
4490	0	0	0	0	0	0	0	Spring	2011-10-29	October	5:30	5:27 rise	Morning
4491	0	0	0	0	0	0	0	Spring	2011-10-29	October	6:00		Morning
4492	0	0	0	0	0	0	0	Spring	2011-10-29	October	6:30		Morning
4493	0	0	0	0	0	0	0	Spring	2011-10-29	October	7:00		Morning
4494	0	0	0	0	0	0	0	Spring	2011-10-29	October	7:30		Morning
4497	0	0	0	0	0	0	0	Spring	2011-10-29	October	9:00		Morning
4500	0	0	0	0	0	0	0	Spring	2011-10-29	October	10:30		Morning
4502	0	0	0	0	0	0	0	Spring	2011-10-29	October	11:30		Morning
4503	0	0	0	0	0	0	0	Spring	2011-10-29	October	12:00		Morning
4504	0	0	0	0	0	0	0	Spring	2011-10-29	October	12:30		Morning
4505	0	0	0	0	0	0	0	Spring	2011-10-29	October	13:00	12:39 transit	Afternoon
4506	0	0	0	0	0	0	0	Spring	2011-10-29	October	13:30		Afternoon
4509	0	0	0	0	0	0	0	Spring	2011-10-29	October	15:00		Afternoon
4510	0	0	0	0	0	0	0	Spring	2011-10-29	October	15:30		Afternoon
4511	0	0	0	0	0	0	0	Spring	2011-10-29	October	16:00		Afternoon
4513	0	0	0	0	0	0	0	Spring	2011-10-29	October	17:00		Afternoon
4515	0	0	0	0	0	0	0	Spring	2011-10-29	October	18:00		Afternoon
4516	0	0	0	0	0	0	0	Spring	2011-10-29	October	18:30		Afternoon
4517	0	0	0	0	0	0	0	Spring	2011-10-29	October	19:00		Afternoon
4518	0	0	0	0	0	0	0	Spring	2011-10-29	October	19:30		Afternoon
4519	0	0	0	0	0	0	0	Spring	2011-10-29	October	20:00	19:51 set	Dusk
4520	0	0	0	0	0	0	0	Spring	2011-10-29	October	20:30		Dusk
4521	0	0	0	0	0	0	0	Spring	2011-10-29	October	21:00	21:13 end	Dusk
4522	0	0	0	0	0	0	0	Spring	2011-10-29	October	21:30		Night
4523	0	0	0	0	0	0	0	Spring	2011-10-29	October	22:00		Night
4524	0	0	0	0	0	0	0	Spring	2011-10-29	October	22:30		Night
4525	0	0	0	0	0	0	0	Spring	2011-10-29	October	23:00		Night
4526	2	32	0	32	0	0	0	Spring	2011-10-29	October	23:30		Night
4528	0	0	0	0	0	0	0	Spring	2011-10-30	October	0:30		Night
4529	0	0	0	0	0	0	0	Spring	2011-10-30	October	1:00		Night
4531	0	0	0	0	0	0	0	Spring	2011-10-30	October	2:00		Night
4533	0	0	0	0	0	0	0	Spring	2011-10-30	October	3:00		Night
4537	0	0	0	0	0	0	0	Spring	2011-10-30	October	5:00		Dawn
4538	0	0	0	0	0	0	0	Spring	2011-10-30	October	5:30	5:25 rise	Morning
4541	0	0	0	0	0	0	0	Spring	2011-10-30	October	7:00		Morning
4542	0	0	0	0	0	0	0	Spring	2011-10-30	October	7:30		Morning
4549	0	0	0	0	0	0	0	Spring	2011-10-30	October	11:00		Morning
4550	0	0	0	0	0	0	0	Spring	2011-10-30	October	11:30		Morning
4551	0	0	0	0	0	0	0	Spring	2011-10-30	October	12:00		Morning
4552	0	0	0	0	0	0	0	Spring	2011-10-30	October	12:30		Morning
4553	0	0	0	0	0	0	0	Spring	2011-10-30	October	13:00	12:39 transit	Afternoon
4554	0	0	0	0	0	0	0	Spring	2011-10-30	October	13:30		Afternoon
4555	0	0	0	0	0	0	0	Spring	2011-10-30	October	14:00		Afternoon
4556	0	0	0	0	0	0	0	Spring	2011-10-30	October	14:30		Afternoon
4557	0	0	0	0	0	0	0	Spring	2011-10-30	October	15:00		Afternoon
4558	0	0	0	0	0	0	0	Spring	2011-10-30	October	15:30		Afternoon
4559	0	0	0	0	0	0	0	Spring	2011-10-30	October	16:00		Afternoon
4560	0	0	0	0	0	0	0	Spring	2011-10-30	October	16:30		Afternoon
4561	0	0	0	0	0	0	0	Spring	2011-10-30	October	17:00		Afternoon
4562	0	0	0	0	0	0	0	Spring	2011-10-30	October	17:30		Afternoon
4563	0	0	0	0	0	0	0	Spring	2011-10-30	October	18:00		Afternoon
4564	0	0	0	0	0	0	0	Spring	2011-10-30	October	18:30		Afternoon
4565	1	16	0	16	0	0	0	Spring	2011-10-30	October	19:00		Afternoon
4566	0	0	0	0	0	0	0	Spring	2011-10-30	October	19:30		Afternoon
4567	0	0	0	0	0	0	0	Spring	2011-10-30	October	20:00	19:53 set	Dusk
4570	3	48	0	48	0	0	0	Spring	2011-10-30	October	21:30	21:16 end	Night
4571	0	0	0	0	0	0	0	Spring	2011-10-30	October	22:00		Night
4572	0	0	0	0	0	0	0	Spring	2011-10-30	October	22:30		Night
4573	0	0	0	0	0	0	0	Spring	2011-10-30	October	23:00		Night
4574	0	0	0	0	0	0	0	Spring	2011-10-30	October	23:30		Night
4575	0	0	0	0	0	0	0	Spring	2011-10-31	October	0:00		Night
4576	0	0	0	0	0	0	0	Spring	2011-10-31	October	0:30		Night
4577	0	0	0	0	0	0	0	Spring	2011-10-31	October	1:00		Night
4578	0	0	0	0	0	0	0	Spring	2011-10-31	October	1:30		Night
4579	0	0	0	0	0	0	0	Spring	2011-10-31	October	2:00		Night
4580	0	0	0	0	0	0	0	Spring	2011-10-31	October	2:30		Night
4581	0	0	0	0	0	0	0	Spring	2011-10-31	October	3:00		Night
4584	0	0	0	0	0	0	0	Spring	2011-10-31	October	4:30		Dawn
4585	0	0	0	0	0	0	0	Spring	2011-10-31	October	5:00		Dawn
4587	0	0	0	0	0	0	0	Spring	2011-10-31	October	6:00		Morning
4588	0	0	0	0	0	0	0	Spring	2011-10-31	October	6:30		Morning
4589	0	0	0	0	0	0	0	Spring	2011-10-31	October	7:00		Morning
4590	0	0	0	0	0	0	0	Spring	2011-10-31	October	7:30		Morning
4591	0	0	0	0	0	0	0	Spring	2011-10-31	October	8:00		Morning
4592	0	0	0	0	0	0	0	Spring	2011-10-31	October	8:30		Morning
4593	0	0	0	0	0	0	0	Spring	2011-10-31	October	9:00		Morning
4594	0	0	0	0	0	0	0	Spring	2011-10-31	October	9:30		Morning
4595	0	0	0	0	0	0	0	Spring	2011-10-31	October	10:00		Morning
4597	5	80	0	80	0	0	0	Spring	2011-10-31	October	11:00		Morning
4598	0	0	0	0	0	0	0	Spring	2011-10-31	October	11:30		Morning
4599	0	0	0	0	0	0	0	Spring	2011-10-31	October	12:00		Morning
4600	0	0	0	0	0	0	0	Spring	2011-10-31	October	12:30		Morning
4601	0	0	0	0	0	0	0	Spring	2011-10-31	October	13:00		Morning
4602	0	0	0	0	0	0	0	Spring	2011-10-31	October	13:30	12:39 transit	Afternoon
4603	0	0	0	0	0	0	0	Spring	2011-10-31	October	14:00		Afternoon
4604	0	0	0	0	0	0	0	Spring	2011-10-31	October	14:30		Afternoon
4605	0	0	0	0	0	0	0	Spring	2011-10-31	October	15:00		Afternoon
4606	0	0	0	0	0	0	0	Spring	2011-10-31	October	15:30		Afternoon
4607	0	0	0	0	0	0	0	Spring	2011-10-31	October	16:00		Afternoon
4608	0	0	0	0	0	0	0	Spring	2011-10-31	October	16:30		Afternoon
4609	0	0	0	0	0	0	0	Spring	2011-10-31	October	17:00		Afternoon
4610	0	0	0	0	0	0	0	Spring	2011-10-31	October	17:30		Afternoon
4611	4	64	0	64	0	0	0	Spring	2011-10-31	October	18:00		Afternoon
4612	0	0	0	0	0	0	0	Spring	2011-10-31	October	18:30		Afternoon
4613	0	0	0	0	0	0	0	Spring	2011-10-31	October	19:00		Afternoon
4614	0	0	0	0	0	0	0	Spring	2011-10-31	October	19:30		Afternoon
4616	0	0	0	0	0	0	0	Spring	2011-10-31	October	20:30		Dusk
4617	0	0	0	0	0	0	0	Spring	2011-10-31	October	21:00		Dusk
4618	0	0	0	0	0	0	0	Spring	2011-10-31	October	21:30	21:18 end	Night
4619	0	0	0	0	0	0	0	Spring	2011-10-31	October	22:00		Night
4620	0	0	0	0	0	0	0	Spring	2011-10-31	October	22:30		Night
4621	0	0	0	0	0	0	0	Spring	2011-10-31	October	23:00		Night
4622	2	32	0	32	0	0	0	Spring	2011-10-31	October	23:30		Night
4625	0	0	0	0	0	0	0	Spring	2011-11-01	November	1:00		Night
4627	0	0	0	0	0	0	0	Spring	2011-11-01	November	2:00		Night
4629	0	0	0	0	0	0	0	Spring	2011-11-01	November	3:00		Night
4633	0	0	0	0	0	0	0	Spring	2011-11-01	November	5:00		Dawn
4634	1	16	0	16	0	0	0	Spring	2011-11-01	November	5:30	5:22 rise	Morning
4635	0	0	0	0	0	0	0	Spring	2011-11-01	November	6:00		Morning
4636	0	0	0	0	0	0	0	Spring	2011-11-01	November	6:30		Morning
4637	0	0	0	0	0	0	0	Spring	2011-11-01	November	7:00		Morning
4638	0	0	0	0	0	0	0	Spring	2011-11-01	November	7:30		Morning
4639	0	0	0	0	0	0	0	Spring	2011-11-01	November	8:00		Morning
4640	4	64	0	64	0	0	0	Spring	2011-11-01	November	8:30		Morning
4641	0	0	0	0	0	0	0	Spring	2011-11-01	November	9:00		Morning
4642	0	0	0	0	0	0	0	Spring	2011-11-01	November	9:30		Morning
4643	0	0	0	0	0	0	0	Spring	2011-11-01	November	10:00		Morning
4644	0	0	0	0	0	0	0	Spring	2011-11-01	November	10:30		Morning
4645	0	0	0	0	0	0	0	Spring	2011-11-01	November	11:00		Morning
4646	0	0	0	0	0	0	0	Spring	2011-11-01	November	11:30		Morning
4647	1	16	0	16	0	0	0	Spring	2011-11-01	November	12:00		Morning
4648	0	0	0	0	0	0	0	Spring	2011-11-01	November	12:30		Morning
4649	0	0	0	0	0	0	0	Spring	2011-11-01	November	13:00	12:40 Transit	Afternoon
4650	0	0	0	0	0	0	0	Spring	2011-11-01	November	13:30		Afternoon
4651	0	0	0	0	0	0	0	Spring	2011-11-01	November	14:00		Afternoon
4652	0	0	0	0	0	0	0	Spring	2011-11-01	November	14:30		Afternoon
4654	0	0	0	0	0	0	0	Spring	2011-11-01	November	15:30		Afternoon
4655	0	0	0	0	0	0	0	Spring	2011-11-01	November	16:00		Afternoon
4657	0	0	0	0	0	0	0	Spring	2011-11-01	November	17:00		Afternoon
4658	0	0	0	0	0	0	0	Spring	2011-11-01	November	17:30		Afternoon
4659	0	0	0	0	0	0	0	Spring	2011-11-01	November	18:00		Afternoon
4660	0	0	0	0	0	0	0	Spring	2011-11-01	November	18:30		Afternoon
4662	0	0	0	0	0	0	0	Spring	2011-11-01	November	19:30		Afternoon
4663	3	48	0	48	0	0	0	Spring	2011-11-01	November	20:00	19:57 set	Dusk
4664	15	240	0	240	0	0	0	Spring	2011-11-01	November	20:30		Dusk
4665	0	0	0	0	0	0	0	Spring	2011-11-01	November	21:00		Dusk
4666	0	0	0	0	0	0	0	Spring	2011-11-01	November	21:30	21:20 end	Night
4667	0	0	0	0	0	0	0	Spring	2011-11-01	November	22:00		Night
4668	0	0	0	0	0	0	0	Spring	2011-11-01	November	22:30		Night
4669	0	0	0	0	0	0	0	Spring	2011-11-01	November	23:00		Night
4670	0	0	0	0	0	0	0	Spring	2011-11-01	November	23:30		Night
4671	0	0	0	0	0	0	0	Spring	2011-11-02	November	0:00		Night
4672	0	0	0	0	0	0	0	Spring	2011-11-02	November	0:30		Night
4673	0	0	0	0	0	0	0	Spring	2011-11-02	November	1:00		Night
4674	0	0	0	0	0	0	0	Spring	2011-11-02	November	1:30		Night
4675	0	0	0	0	0	0	0	Spring	2011-11-02	November	2:00		Night
4676	0	0	0	0	0	0	0	Spring	2011-11-02	November	2:30		Night
4677	0	0	0	0	0	0	0	Spring	2011-11-02	November	3:00		Night
4678	0	0	0	0	0	0	0	Spring	2011-11-02	November	3:30		Night
4679	0	0	0	0	0	0	0	Spring	2011-11-02	November	4:00	3:56 begin	Dawn
4680	0	0	0	0	0	0	0	Spring	2011-11-02	November	4:30		Dawn
4681	0	0	0	0	0	0	0	Spring	2011-11-02	November	5:00		Dawn
4682	0	0	0	0	0	0	0	Spring	2011-11-02	November	5:30	5:20 rise	Morning
4683	0	0	0	0	0	0	0	Spring	2011-11-02	November	6:00		Morning
4684	0	0	0	0	0	0	0	Spring	2011-11-02	November	6:30		Morning
4685	0	0	0	0	0	0	0	Spring	2011-11-02	November	7:00		Morning
4686	0	0	0	0	0	0	0	Spring	2011-11-02	November	7:30		Morning
4687	0	0	0	0	0	0	0	Spring	2011-11-02	November	8:00		Morning
4688	0	0	0	0	0	0	0	Spring	2011-11-02	November	8:30		Morning
4689	0	0	0	0	0	0	0	Spring	2011-11-02	November	9:00		Morning
4690	0	0	0	0	0	0	0	Spring	2011-11-02	November	9:30		Morning
4692	1	16	0	16	0	0	0	Spring	2011-11-02	November	10:30		Morning
4696	0	0	0	0	0	0	0	Spring	2011-11-02	November	12:30		Morning
4697	0	0	0	0	0	0	0	Spring	2011-11-02	November	13:00	12:40 Transit	Afternoon
4698	0	0	0	0	0	0	0	Spring	2011-11-02	November	13:30		Afternoon
4699	0	0	0	0	0	0	0	Spring	2011-11-02	November	14:00		Afternoon
4700	0	0	0	0	0	0	0	Spring	2011-11-02	November	14:30		Afternoon
4701	0	0	0	0	0	0	0	Spring	2011-11-02	November	15:00		Afternoon
4702	0	0	0	0	0	0	0	Spring	2011-11-02	November	15:30		Afternoon
4704	0	0	0	0	0	0	0	Spring	2011-11-02	November	16:30		Afternoon
4705	0	0	0	0	0	0	0	Spring	2011-11-02	November	17:00		Afternoon
4707	0	0	0	0	0	0	0	Spring	2011-11-02	November	18:00		Afternoon
4708	0	0	0	0	0	0	0	Spring	2011-11-02	November	18:30		Afternoon
4709	0	0	0	0	0	0	0	Spring	2011-11-02	November	19:00		Afternoon
4710	0	0	0	0	0	0	0	Spring	2011-11-02	November	19:30		Afternoon
4711	0	0	0	0	0	0	0	Spring	2011-11-02	November	20:00	19:58 set	Dusk
4712	0	0	0	0	0	0	0	Spring	2011-11-02	November	20:30		Dusk
4713	1	16	0	16	0	0	0	Spring	2011-11-02	November	21:00		Dusk
4714	0	0	0	0	0	0	0	Spring	2011-11-02	November	21:30	21:23 end	Night
4715	0	0	0	0	0	0	0	Spring	2011-11-02	November	22:00		Night
4716	0	0	0	0	0	0	0	Spring	2011-11-02	November	22:30		Night
4717	0	0	0	0	0	0	0	Spring	2011-11-02	November	23:00		Night
4718	0	0	0	0	0	0	0	Spring	2011-11-02	November	23:30		Night
4719	0	0	0	0	0	0	0	Spring	2011-11-03	November	0:00		Night
4720	0	0	0	0	0	0	0	Spring	2011-11-03	November	0:30		Night
4721	0	0	0	0	0	0	0	Spring	2011-11-03	November	1:00		Night
4722	0	0	0	0	0	0	0	Spring	2011-11-03	November	1:30		Night
4724	1	16	0	16	0	0	0	Spring	2011-11-03	November	2:30		Night
4725	0	0	0	0	0	0	0	Spring	2011-11-03	November	3:00		Night
4731	0	0	0	0	0	0	0	Spring	2011-11-03	November	6:00		Morning
4732	0	0	0	0	0	0	0	Spring	2011-11-03	November	6:30		Morning
4735	0	0	0	0	0	0	0	Spring	2011-11-03	November	8:00		Morning
4738	0	0	0	0	0	0	0	Spring	2011-11-03	November	9:30		Morning
4739	0	0	0	0	0	0	0	Spring	2011-11-03	November	10:00		Morning
4742	0	0	0	0	0	0	0	Spring	2011-11-03	November	11:30		Morning
4745	0	0	0	0	0	0	0	Spring	2011-11-03	November	13:00	12:40 Transit	Afternoon
4747	0	0	0	0	0	0	0	Spring	2011-11-03	November	14:00		Afternoon
4749	0	0	0	0	0	0	0	Spring	2011-11-03	November	15:00		Afternoon
4750	0	0	0	0	0	0	0	Spring	2011-11-03	November	15:30		Afternoon
4751	0	0	0	0	0	0	0	Spring	2011-11-03	November	16:00		Afternoon
4752	0	0	0	0	0	0	0	Spring	2011-11-03	November	16:30		Afternoon
4753	0	0	0	0	0	0	0	Spring	2011-11-03	November	17:00		Afternoon
4754	0	0	0	0	0	0	0	Spring	2011-11-03	November	17:30		Afternoon
4756	0	0	0	0	0	0	0	Spring	2011-11-03	November	18:30		Afternoon
4758	0	0	0	0	0	0	0	Spring	2011-11-03	November	19:30		Afternoon
4760	0	0	0	0	0	0	0	Spring	2011-11-03	November	20:30		Dusk
4761	0	0	0	0	0	0	0	Spring	2011-11-03	November	21:00		Dusk
4762	0	0	0	0	0	0	0	Spring	2011-11-03	November	21:30	21:25 end	Night
4763	0	0	0	0	0	0	0	Spring	2011-11-03	November	22:00		Night
4764	0	0	0	0	0	0	0	Spring	2011-11-03	November	22:30		Night
4765	0	0	0	0	0	0	0	Spring	2011-11-03	November	23:00		Night
4766	0	0	0	0	0	0	0	Spring	2011-11-03	November	23:30		Night
4767	0	0	0	0	0	0	0	Spring	2011-11-04	November	0:00		Night
4768	0	0	0	0	0	0	0	Spring	2011-11-04	November	0:30		Night
4769	0	0	0	0	0	0	0	Spring	2011-11-04	November	1:00		Night
4770	0	0	0	0	0	0	0	Spring	2011-11-04	November	1:30		Night
4771	5	80	0	80	0	0	0	Spring	2011-11-04	November	2:00		Night
4772	0	0	0	0	0	0	0	Spring	2011-11-04	November	2:30		Night
4773	0	0	0	0	0	0	0	Spring	2011-11-04	November	3:00		Night
4774	0	0	0	0	0	0	0	Spring	2011-11-04	November	3:30		Night
4776	0	0	0	0	0	0	0	Spring	2011-11-04	November	4:30		Dawn
4777	0	0	0	0	0	0	0	Spring	2011-11-04	November	5:00		Dawn
4778	0	0	0	0	0	0	0	Spring	2011-11-04	November	5:30	5:16 rise	Morning
4779	0	0	0	0	0	0	0	Spring	2011-11-04	November	6:00		Morning
4780	0	0	0	0	0	0	0	Spring	2011-11-04	November	6:30		Morning
4781	0	0	0	0	0	0	0	Spring	2011-11-04	November	7:00		Morning
4782	0	0	0	0	0	0	0	Spring	2011-11-04	November	7:30		Morning
4783	0	0	0	0	0	0	0	Spring	2011-11-04	November	8:00		Morning
4784	0	0	0	0	0	0	0	Spring	2011-11-04	November	8:30		Morning
4785	0	0	0	0	0	0	0	Spring	2011-11-04	November	9:00		Morning
4786	0	0	0	0	0	0	0	Spring	2011-11-04	November	9:30		Morning
4787	0	0	0	0	0	0	0	Spring	2011-11-04	November	10:00		Morning
4789	0	0	0	0	0	0	0	Spring	2011-11-04	November	11:00		Morning
4790	0	0	0	0	0	0	0	Spring	2011-11-04	November	11:30		Morning
4791	0	0	0	0	0	0	0	Spring	2011-11-04	November	12:00		Morning
4792	0	0	0	0	0	0	0	Spring	2011-11-04	November	12:30		Morning
4793	0	0	0	0	0	0	0	Spring	2011-11-04	November	13:00	12:40 Transit	Afternoon
4794	0	0	0	0	0	0	0	Spring	2011-11-04	November	13:30		Afternoon
4795	0	0	0	0	0	0	0	Spring	2011-11-04	November	14:00		Afternoon
4796	0	0	0	0	0	0	0	Spring	2011-11-04	November	14:30		Afternoon
4797	0	0	0	0	0	0	0	Spring	2011-11-04	November	15:00		Afternoon
4799	0	0	0	0	0	0	0	Spring	2011-11-04	November	16:00		Afternoon
4800	0	0	0	0	0	0	0	Spring	2011-11-04	November	16:30		Afternoon
4801	0	0	0	0	0	0	0	Spring	2011-11-04	November	17:00		Afternoon
4802	0	0	0	0	0	0	0	Spring	2011-11-04	November	17:30		Afternoon
4804	0	0	0	0	0	0	0	Spring	2011-11-04	November	18:30		Afternoon
4805	1	16	0	16	0	0	0	Spring	2011-11-04	November	19:00		Afternoon
4806	0	0	0	0	0	0	0	Spring	2011-11-04	November	19:30		Afternoon
4807	0	0	0	0	0	0	0	Spring	2011-11-04	November	20:00	20:02 set	Dusk
4809	0	0	0	0	0	0	0	Spring	2011-11-04	November	21:00		Dusk
4811	2	32	0	32	0	0	0	Spring	2011-11-04	November	22:00		Night
4812	1	16	0	16	0	0	0	Spring	2011-11-04	November	22:30		Night
4814	0	0	0	0	0	0	0	Spring	2011-11-04	November	23:30		Night
4815	0	0	0	0	0	0	0	Spring	2011-11-05	November	0:00		Night
4816	0	0	0	0	0	0	0	Spring	2011-11-05	November	0:30		Night
4817	0	0	0	0	0	0	0	Spring	2011-11-05	November	1:00		Night
4818	0	0	0	0	0	0	0	Spring	2011-11-05	November	1:30		Night
4819	0	0	0	0	0	0	0	Spring	2011-11-05	November	2:00		Night
4820	0	0	0	0	0	0	0	Spring	2011-11-05	November	2:30		Night
4821	0	0	0	0	0	0	0	Spring	2011-11-05	November	3:00		Night
4823	0	0	0	0	0	0	0	Spring	2011-11-05	November	4:00	3:49 begin	Dawn
4824	0	0	0	0	0	0	0	Spring	2011-11-05	November	4:30		Dawn
4825	0	0	0	0	0	0	0	Spring	2011-11-05	November	5:00	5:14 rise	Dawn
4826	0	0	0	0	0	0	0	Spring	2011-11-05	November	5:30		Morning
4828	0	0	0	0	0	0	0	Spring	2011-11-05	November	6:30		Morning
4829	0	0	0	0	0	0	0	Spring	2011-11-05	November	7:00		Morning
4830	0	0	0	0	0	0	0	Spring	2011-11-05	November	7:30		Morning
4831	0	0	0	0	0	0	0	Spring	2011-11-05	November	8:00		Morning
4832	0	0	0	0	0	0	0	Spring	2011-11-05	November	8:30		Morning
4833	0	0	0	0	0	0	0	Spring	2011-11-05	November	9:00		Morning
4835	0	0	0	0	0	0	0	Spring	2011-11-05	November	10:00		Morning
4836	0	0	0	0	0	0	0	Spring	2011-11-05	November	10:30		Morning
4837	0	0	0	0	0	0	0	Spring	2011-11-05	November	11:00		Morning
4840	0	0	0	0	0	0	0	Spring	2011-11-05	November	12:30	12:40 Transit	Morning
4842	0	0	0	0	0	0	0	Spring	2011-11-05	November	13:30		Afternoon
4843	0	0	0	0	0	0	0	Spring	2011-11-05	November	14:00		Afternoon
4844	0	0	0	0	0	0	0	Spring	2011-11-05	November	14:30		Afternoon
4845	0	0	0	0	0	0	0	Spring	2011-11-05	November	15:00		Afternoon
4846	0	0	0	0	0	0	0	Spring	2011-11-05	November	15:30		Afternoon
4847	0	0	0	0	0	0	0	Spring	2011-11-05	November	16:00		Afternoon
4848	0	0	0	0	0	0	0	Spring	2011-11-05	November	16:30		Afternoon
4849	0	0	0	0	0	0	0	Spring	2011-11-05	November	17:00		Afternoon
4850	0	0	0	0	0	0	0	Spring	2011-11-05	November	17:30		Afternoon
4851	0	0	0	0	0	0	0	Spring	2011-11-05	November	18:00		Afternoon
4852	0	0	0	0	0	0	0	Spring	2011-11-05	November	18:30		Afternoon
4853	0	0	0	0	0	0	0	Spring	2011-11-05	November	19:00		Afternoon
4855	0	0	0	0	0	0	0	Spring	2011-11-05	November	20:00	20:04 set	Afternoon
4856	0	0	0	0	0	0	0	Spring	2011-11-05	November	20:30		Dusk
4857	0	0	0	0	0	0	0	Spring	2011-11-05	November	21:00		Dusk
4859	0	0	0	0	0	0	0	Spring	2011-11-05	November	22:00		Night
4860	0	0	0	0	0	0	0	Spring	2011-11-05	November	22:30		Night
4861	0	0	0	0	0	0	0	Spring	2011-11-05	November	23:00		Night
4862	0	0	0	0	0	0	0	Spring	2011-11-05	November	23:30		Night
4863	0	0	0	0	0	0	0	Spring	2011-11-06	November	0:00		Night
4864	0	0	0	0	0	0	0	Spring	2011-11-06	November	0:30		Night
4865	0	0	0	0	0	0	0	Spring	2011-11-06	November	1:00		Night
4866	0	0	0	0	0	0	0	Spring	2011-11-06	November	1:30		Night
4867	0	0	0	0	0	0	0	Spring	2011-11-06	November	2:00		Night
4868	0	0	0	0	0	0	0	Spring	2011-11-06	November	2:30		Night
4869	0	0	0	0	0	0	0	Spring	2011-11-06	November	3:00		Night
4870	0	0	0	0	0	0	0	Spring	2011-11-06	November	3:30		Night
4871	0	0	0	0	0	0	0	Spring	2011-11-06	November	4:00	3:47 begin	Dawn
4872	0	0	0	0	0	0	0	Spring	2011-11-06	November	4:30		Dawn
4873	0	0	0	0	0	0	0	Spring	2011-11-06	November	5:00	5:13 rise	Dawn
4874	0	0	0	0	0	0	0	Spring	2011-11-06	November	5:30		Morning
4875	0	0	0	0	0	0	0	Spring	2011-11-06	November	6:00		Morning
4876	0	0	0	0	0	0	0	Spring	2011-11-06	November	6:30		Morning
4877	0	0	0	0	0	0	0	Spring	2011-11-06	November	7:00		Morning
4878	0	0	0	0	0	0	0	Spring	2011-11-06	November	7:30		Morning
4879	0	0	0	0	0	0	0	Spring	2011-11-06	November	8:00		Morning
4880	0	0	0	0	0	0	0	Spring	2011-11-06	November	8:30		Morning
4881	0	0	0	0	0	0	0	Spring	2011-11-06	November	9:00		Morning
4882	0	0	0	0	0	0	0	Spring	2011-11-06	November	9:30		Morning
4883	0	0	0	0	0	0	0	Spring	2011-11-06	November	10:00		Morning
4885	0	0	0	0	0	0	0	Spring	2011-11-06	November	11:00		Morning
4886	0	0	0	0	0	0	0	Spring	2011-11-06	November	11:30		Morning
4887	0	0	0	0	0	0	0	Spring	2011-11-06	November	12:00		Morning
4889	0	0	0	0	0	0	0	Spring	2011-11-06	November	13:00	12:39 transit	Morning
4890	0	0	0	0	0	0	0	Spring	2011-11-06	November	13:30		Afternoon
4891	0	0	0	0	0	0	0	Spring	2011-11-06	November	14:00		Afternoon
4892	0	0	0	0	0	0	0	Spring	2011-11-06	November	14:30		Afternoon
4893	0	0	0	0	0	0	0	Spring	2011-11-06	November	15:00		Afternoon
4894	0	0	0	0	0	0	0	Spring	2011-11-06	November	15:30		Afternoon
4895	0	0	0	0	0	0	0	Spring	2011-11-06	November	16:00		Afternoon
4896	0	0	0	0	0	0	0	Spring	2011-11-06	November	16:30		Afternoon
4897	0	0	0	0	0	0	0	Spring	2011-11-06	November	17:00		Afternoon
4898	0	0	0	0	0	0	0	Spring	2011-11-06	November	17:30		Afternoon
4899	0	0	0	0	0	0	0	Spring	2011-11-06	November	18:00		Afternoon
4900	0	0	0	0	0	0	0	Spring	2011-11-06	November	18:30		Afternoon
4901	0	0	0	0	0	0	0	Spring	2011-11-06	November	19:00		Afternoon
4903	0	0	0	0	0	0	0	Spring	2011-11-06	November	20:00	20:05 set	Afternoon
4904	0	0	0	0	0	0	0	Spring	2011-11-06	November	20:30		Dusk
4905	0	0	0	0	0	0	0	Spring	2011-11-06	November	21:00		Dusk
4906	0	0	0	0	0	0	0	Spring	2011-11-06	November	21:30	21:32 end	Dusk
4907	0	0	0	0	0	0	0	Spring	2011-11-06	November	22:00		Night
4908	0	0	0	0	0	0	0	Spring	2011-11-06	November	22:30		Night
4909	0	0	0	0	0	0	0	Spring	2011-11-06	November	23:00		Night
4911	0	0	0	0	0	0	0	Spring	2011-11-07	November	0:00		Night
4912	0	0	0	0	0	0	0	Spring	2011-11-07	November	0:30		Night
4913	0	0	0	0	0	0	0	Spring	2011-11-07	November	1:00		Night
4914	0	0	0	0	0	0	0	Spring	2011-11-07	November	1:30		Night
4915	0	0	0	0	0	0	0	Spring	2011-11-07	November	2:00		Night
4916	0	0	0	0	0	0	0	Spring	2011-11-07	November	2:30		Night
4918	2	32	0	32	0	0	0	Spring	2011-11-07	November	3:30		Night
4919	0	0	0	0	0	0	0	Spring	2011-11-07	November	4:00	3:45 begin	Dawn
4920	0	0	0	0	0	0	0	Spring	2011-11-07	November	4:30		Dawn
4922	0	0	0	0	0	0	0	Spring	2011-11-07	November	5:30		Morning
4923	0	0	0	0	0	0	0	Spring	2011-11-07	November	6:00		Morning
4924	0	0	0	0	0	0	0	Spring	2011-11-07	November	6:30		Morning
4925	0	0	0	0	0	0	0	Spring	2011-11-07	November	7:00		Morning
4926	0	0	0	0	0	0	0	Spring	2011-11-07	November	7:30		Morning
4928	0	0	0	0	0	0	0	Spring	2011-11-07	November	8:30		Morning
4929	0	0	0	0	0	0	0	Spring	2011-11-07	November	9:00		Morning
4930	0	0	0	0	0	0	0	Spring	2011-11-07	November	9:30		Morning
4931	0	0	0	0	0	0	0	Spring	2011-11-07	November	10:00		Morning
4933	0	0	0	0	0	0	0	Spring	2011-11-07	November	11:00		Morning
4934	0	0	0	0	0	0	0	Spring	2011-11-07	November	11:30		Morning
4935	0	0	0	0	0	0	0	Spring	2011-11-07	November	12:00		Morning
4937	0	0	0	0	0	0	0	Spring	2011-11-07	November	13:00	12:39 transit	Morning
4942	0	0	0	0	0	0	0	Spring	2011-11-07	November	15:30		Afternoon
4943	0	0	0	0	0	0	0	Spring	2011-11-07	November	16:00		Afternoon
4945	0	0	0	0	0	0	0	Spring	2011-11-07	November	17:00		Afternoon
4946	0	0	0	0	0	0	0	Spring	2011-11-07	November	17:30		Afternoon
4947	1	16	0	16	0	0	0	Spring	2011-11-07	November	18:00		Afternoon
4951	0	0	0	0	0	0	0	Spring	2011-11-07	November	20:00	20:07 set	Afternoon
4954	0	0	0	0	0	0	0	Spring	2011-11-07	November	21:30	21:34 end	Dusk
4960	0	0	0	0	0	0	0	Spring	2011-11-08	November	0:30		Night
4962	0	0	0	0	0	0	0	Spring	2011-11-08	November	1:30		Night
4963	0	0	0	0	0	0	0	Spring	2011-11-08	November	2:00		Night
4964	0	0	0	0	0	0	0	Spring	2011-11-08	November	2:30		Night
4971	0	0	0	0	0	0	0	Spring	2011-11-08	November	6:00		Morning
4975	0	0	0	0	0	0	0	Spring	2011-11-08	November	8:00		Morning
4977	0	0	0	0	0	0	0	Spring	2011-11-08	November	9:00		Morning
4978	0	0	0	0	0	0	0	Spring	2011-11-08	November	9:30		Morning
4980	0	0	0	0	0	0	0	Spring	2011-11-08	November	10:30		Morning
4982	0	0	0	0	0	0	0	Spring	2011-11-08	November	11:30		Morning
4984	0	0	0	0	0	0	0	Spring	2011-11-08	November	12:30		Morning
4985	0	0	0	0	0	0	0	Spring	2011-11-08	November	13:00	12:39 transit	Afternoon
4986	0	0	0	0	0	0	0	Spring	2011-11-08	November	13:30		Afternoon
4987	0	0	0	0	0	0	0	Spring	2011-11-08	November	14:00		Afternoon
4988	0	0	0	0	0	0	0	Spring	2011-11-08	November	14:30		Afternoon
4989	0	0	0	0	0	0	0	Spring	2011-11-08	November	15:00		Afternoon
4991	0	0	0	0	0	0	0	Spring	2011-11-08	November	16:00		Afternoon
4994	0	0	0	0	0	0	0	Spring	2011-11-08	November	17:30		Afternoon
4995	0	0	0	0	0	0	0	Spring	2011-11-08	November	18:00		Afternoon
4997	0	0	0	0	0	0	0	Spring	2011-11-08	November	19:00		Afternoon
4998	0	0	0	0	0	0	0	Spring	2011-11-08	November	19:30		Afternoon
4999	0	0	0	0	0	0	0	Spring	2011-11-08	November	20:00	20:09 set	Afternoon
5000	0	0	0	0	0	0	0	Spring	2011-11-08	November	20:30		Dusk
5001	0	0	0	0	0	0	0	Spring	2011-11-08	November	21:00		Dusk
5002	0	0	0	0	0	0	0	Spring	2011-11-08	November	21:30	21:37 end	Dusk
5004	0	0	0	0	0	0	0	Spring	2011-11-08	November	22:30		Night
5006	0	0	0	0	0	0	0	Spring	2011-11-08	November	23:30		Night
5007	0	0	0	0	0	0	0	Spring	2011-11-09	November	0:00		Night
5008	0	0	0	0	0	0	0	Spring	2011-11-09	November	0:30		Night
5009	0	0	0	0	0	0	0	Spring	2011-11-09	November	1:00		Night
5011	0	0	0	0	0	0	0	Spring	2011-11-09	November	2:00		Night
5013	0	0	0	0	0	0	0	Spring	2011-11-09	November	3:00		Night
5014	0	0	0	0	0	0	0	Spring	2011-11-09	November	3:30	3:40 begin	Night
5015	0	0	0	0	0	0	0	Spring	2011-11-09	November	4:00		Dawn
5016	0	0	0	0	0	0	0	Spring	2011-11-09	November	4:30		Dawn
5017	0	0	0	0	0	0	0	Spring	2011-11-09	November	5:00	5:08 rise	Dawn
5018	0	0	0	0	0	0	0	Spring	2011-11-09	November	5:30		Morning
5019	0	0	0	0	0	0	0	Spring	2011-11-09	November	6:00		Morning
5020	0	0	0	0	0	0	0	Spring	2011-11-09	November	6:30		Morning
5021	0	0	0	0	0	0	0	Spring	2011-11-09	November	7:00		Morning
5022	0	0	0	0	0	0	0	Spring	2011-11-09	November	7:30		Morning
5023	0	0	0	0	0	0	0	Spring	2011-11-09	November	8:00		Morning
5024	0	0	0	0	0	0	0	Spring	2011-11-09	November	8:30		Morning
5026	0	0	0	0	0	0	0	Spring	2011-11-09	November	9:30		Morning
5027	0	0	0	0	0	0	0	Spring	2011-11-09	November	10:00		Morning
5028	0	0	0	0	0	0	0	Spring	2011-11-09	November	10:30		Morning
5029	0	0	0	0	0	0	0	Spring	2011-11-09	November	11:00		Morning
5030	0	0	0	0	0	0	0	Spring	2011-11-09	November	11:30		Morning
5031	0	0	0	0	0	0	0	Spring	2011-11-09	November	12:00		Morning
5032	0	0	0	0	0	0	0	Spring	2011-11-09	November	12:30		Morning
5034	0	0	0	0	0	0	0	Spring	2011-11-09	November	13:30		Afternoon
5035	0	0	0	0	0	0	0	Spring	2011-11-09	November	14:00		Afternoon
5036	0	0	0	0	0	0	0	Spring	2011-11-09	November	14:30		Afternoon
5037	0	0	0	0	0	0	0	Spring	2011-11-09	November	15:00		Afternoon
5038	0	0	0	0	0	0	0	Spring	2011-11-09	November	15:30		Afternoon
5039	0	0	0	0	0	0	0	Spring	2011-11-09	November	16:00		Afternoon
5040	0	0	0	0	0	0	0	Spring	2011-11-09	November	16:30		Afternoon
5041	0	0	0	0	0	0	0	Spring	2011-11-09	November	17:00		Afternoon
5042	0	0	0	0	0	0	0	Spring	2011-11-09	November	17:30		Afternoon
5043	0	0	0	0	0	0	0	Spring	2011-11-09	November	18:00		Afternoon
5044	0	0	0	0	0	0	0	Spring	2011-11-09	November	18:30		Afternoon
5045	0	0	0	0	0	0	0	Spring	2011-11-09	November	19:00		Afternoon
5046	0	0	0	0	0	0	0	Spring	2011-11-09	November	19:30		Afternoon
5047	0	0	0	0	0	0	0	Spring	2011-11-09	November	20:00	20:11 set	Afternoon
5048	0	0	0	0	0	0	0	Spring	2011-11-09	November	20:30		Dusk
5049	0	0	0	0	0	0	0	Spring	2011-11-09	November	21:00		Dusk
5050	0	0	0	0	0	0	0	Spring	2011-11-09	November	21:30	21:39 end	Dusk
5051	0	0	0	0	0	0	0	Spring	2011-11-09	November	22:00		Night
5052	0	0	0	0	0	0	0	Spring	2011-11-09	November	22:30		Night
5053	0	0	0	0	0	0	0	Spring	2011-11-09	November	23:00		Night
5054	0	0	0	0	0	0	0	Spring	2011-11-09	November	23:30		Night
5056	0	0	0	0	0	0	0	Spring	2011-11-10	November	0:30		Night
5057	0	0	0	0	0	0	0	Spring	2011-11-10	November	1:00		Night
5058	0	0	0	0	0	0	0	Spring	2011-11-10	November	1:30		Night
5059	0	0	0	0	0	0	0	Spring	2011-11-10	November	2:00		Night
5060	0	0	0	0	0	0	0	Spring	2011-11-10	November	2:30		Night
5061	0	0	0	0	0	0	0	Spring	2011-11-10	November	3:00		Night
5062	0	0	0	0	0	0	0	Spring	2011-11-10	November	3:30	3:38 begin	Night
5063	0	0	0	0	0	0	0	Spring	2011-11-10	November	4:00		Dawn
5064	0	0	0	0	0	0	0	Spring	2011-11-10	November	4:30		Dawn
5065	0	0	0	0	0	0	0	Spring	2011-11-10	November	5:00	5:06 rise	Dawn
5066	0	0	0	0	0	0	0	Spring	2011-11-10	November	5:30		Morning
5067	0	0	0	0	0	0	0	Spring	2011-11-10	November	6:00		Morning
5068	0	0	0	0	0	0	0	Spring	2011-11-10	November	6:30		Morning
5069	0	0	0	0	0	0	0	Spring	2011-11-10	November	7:00		Morning
5070	0	0	0	0	0	0	0	Spring	2011-11-10	November	7:30		Morning
5071	0	0	0	0	0	0	0	Spring	2011-11-10	November	8:00		Morning
5072	0	0	0	0	0	0	0	Spring	2011-11-10	November	8:30		Morning
5073	0	0	0	0	0	0	0	Spring	2011-11-10	November	9:00		Morning
5074	0	0	0	0	0	0	0	Spring	2011-11-10	November	9:30		Morning
5075	0	0	0	0	0	0	0	Spring	2011-11-10	November	10:00		Morning
5076	0	0	0	0	0	0	0	Spring	2011-11-10	November	10:30		Morning
5077	0	0	0	0	0	0	0	Spring	2011-11-10	November	11:00		Morning
5078	0	0	0	0	0	0	0	Spring	2011-11-10	November	11:30		Morning
5079	0	0	0	0	0	0	0	Spring	2011-11-10	November	12:00		Morning
5080	0	0	0	0	0	0	0	Spring	2011-11-10	November	12:30		Morning
5081	0	0	0	0	0	0	0	Spring	2011-11-10	November	13:00	12:39 transit	Afternoon
5083	0	0	0	0	0	0	0	Spring	2011-11-10	November	14:00		Afternoon
5084	0	0	0	0	0	0	0	Spring	2011-11-10	November	14:30		Afternoon
5085	0	0	0	0	0	0	0	Spring	2011-11-10	November	15:00		Afternoon
5086	0	0	0	0	0	0	0	Spring	2011-11-10	November	15:30		Afternoon
5087	0	0	0	0	0	0	0	Spring	2011-11-10	November	16:00		Afternoon
5089	0	0	0	0	0	0	0	Spring	2011-11-10	November	17:00		Afternoon
5090	0	0	0	0	0	0	0	Spring	2011-11-10	November	17:30		Afternoon
5091	0	0	0	0	0	0	0	Spring	2011-11-10	November	18:00		Afternoon
5092	0	0	0	0	0	0	0	Spring	2011-11-10	November	18:30		Afternoon
5094	1	16	0	16	0	0	0	Spring	2011-11-10	November	19:30		Afternoon
5095	0	0	0	0	0	0	0	Spring	2011-11-10	November	20:00	20:12 set	Afternoon
5096	0	0	0	0	0	0	0	Spring	2011-11-10	November	20:30		Dusk
5098	0	0	0	0	0	0	0	Spring	2011-11-10	November	21:30	21:42 end	Dusk
5099	0	0	0	0	0	0	0	Spring	2011-11-10	November	22:00		Night
5100	0	0	0	0	0	0	0	Spring	2011-11-10	November	22:30		Night
5101	0	0	0	0	0	0	0	Spring	2011-11-10	November	23:00		Night
5102	0	0	0	0	0	0	0	Spring	2011-11-10	November	23:30		Night
5104	0	0	0	0	0	0	0	Spring	2011-11-11	November	0:30		Night
5105	0	0	0	0	0	0	0	Spring	2011-11-11	November	1:00		Night
5106	0	0	0	0	0	0	0	Spring	2011-11-11	November	1:30		Night
5108	0	0	0	0	0	0	0	Spring	2011-11-11	November	2:30		Night
5109	0	0	0	0	0	0	0	Spring	2011-11-11	November	3:00		Night
5110	0	0	0	0	0	0	0	Spring	2011-11-11	November	3:30	3:36 begin	Night
5111	0	0	0	0	0	0	0	Spring	2011-11-11	November	4:00		Dawn
5114	0	0	0	0	0	0	0	Spring	2011-11-11	November	5:30		Morning
5115	0	0	0	0	0	0	0	Spring	2011-11-11	November	6:00		Morning
5118	0	0	0	0	0	0	0	Spring	2011-11-11	November	7:30		Morning
5119	0	0	0	0	0	0	0	Spring	2011-11-11	November	8:00		Morning
5120	0	0	0	0	0	0	0	Spring	2011-11-11	November	8:30		Morning
5121	0	0	0	0	0	0	0	Spring	2011-11-11	November	9:00		Morning
5123	0	0	0	0	0	0	0	Spring	2011-11-11	November	10:00		Morning
5125	0	0	0	0	0	0	0	Spring	2011-11-11	November	11:00		Morning
5128	0	0	0	0	0	0	0	Spring	2011-11-11	November	12:30		Morning
5132	0	0	0	0	0	0	0	Spring	2011-11-11	November	14:30		Afternoon
5134	0	0	0	0	0	0	0	Spring	2011-11-11	November	15:30		Afternoon
5141	0	0	0	0	0	0	0	Spring	2011-11-11	November	19:00		Afternoon
5145	0	0	0	0	0	0	0	Spring	2011-11-11	November	21:00		Dusk
5150	0	0	0	0	0	0	0	Spring	2011-11-11	November	23:30		Night
5151	0	0	0	0	0	0	0	Spring	2011-11-12	November	0:00		Night
5153	0	0	0	0	0	0	0	Spring	2011-11-12	November	1:00		Night
5154	0	0	0	0	0	0	0	Spring	2011-11-12	November	1:30		Night
5155	0	0	0	0	0	0	0	Spring	2011-11-12	November	2:00		Night
5157	0	0	0	0	0	0	0	Spring	2011-11-12	November	3:00		Night
5158	0	0	0	0	0	0	0	Spring	2011-11-12	November	3:30	3:33 begin	Night
5159	0	0	0	0	0	0	0	Spring	2011-11-12	November	4:00		Dawn
5160	0	0	0	0	0	0	0	Spring	2011-11-12	November	4:30		Dawn
5161	0	0	0	0	0	0	0	Spring	2011-11-12	November	5:00	5:03 rise	Dawn
5162	0	0	0	0	0	0	0	Spring	2011-11-12	November	5:30		Morning
5163	0	0	0	0	0	0	0	Spring	2011-11-12	November	6:00		Morning
5164	0	0	0	0	0	0	0	Spring	2011-11-12	November	6:30		Morning
5165	0	0	0	0	0	0	0	Spring	2011-11-12	November	7:00		Morning
5166	0	0	0	0	0	0	0	Spring	2011-11-12	November	7:30		Morning
5167	0	0	0	0	0	0	0	Spring	2011-11-12	November	8:00		Morning
5168	0	0	0	0	0	0	0	Spring	2011-11-12	November	8:30		Morning
5170	0	0	0	0	0	0	0	Spring	2011-11-12	November	9:30		Morning
5171	0	0	0	0	0	0	0	Spring	2011-11-12	November	10:00		Morning
5172	0	0	0	0	0	0	0	Spring	2011-11-12	November	10:30		Morning
5173	0	0	0	0	0	0	0	Spring	2011-11-12	November	11:00		Morning
5174	0	0	0	0	0	0	0	Spring	2011-11-12	November	11:30		Morning
5175	0	0	0	0	0	0	0	Spring	2011-11-12	November	12:00		Morning
5176	0	0	0	0	0	0	0	Spring	2011-11-12	November	12:30		Morning
5178	0	0	0	0	0	0	0	Spring	2011-11-12	November	13:30		Afternoon
5179	0	0	0	0	0	0	0	Spring	2011-11-12	November	14:00		Afternoon
5180	0	0	0	0	0	0	0	Spring	2011-11-12	November	14:30		Afternoon
5181	0	0	0	0	0	0	0	Spring	2011-11-12	November	15:00		Afternoon
5182	0	0	0	0	0	0	0	Spring	2011-11-12	November	15:30		Afternoon
5183	1	16	0	16	0	0	0	Spring	2011-11-12	November	16:00		Afternoon
5184	0	0	0	0	0	0	0	Spring	2011-11-12	November	16:30		Afternoon
5185	0	0	0	0	0	0	0	Spring	2011-11-12	November	17:00		Afternoon
5186	1	16	0	16	0	0	0	Spring	2011-11-12	November	17:30		Afternoon
5187	3	48	0	48	0	0	0	Spring	2011-11-12	November	18:00		Afternoon
5188	0	0	0	0	0	0	0	Spring	2011-11-12	November	18:30		Afternoon
5189	0	0	0	0	0	0	0	Spring	2011-11-12	November	19:00		Afternoon
5190	0	0	0	0	0	0	0	Spring	2011-11-12	November	19:30		Afternoon
5191	0	0	0	0	0	0	0	Spring	2011-11-12	November	20:00		Afternoon
5192	0	0	0	0	0	0	0	Spring	2011-11-12	November	20:30	20:16 set	Dusk
5193	0	0	0	0	0	0	0	Spring	2011-11-12	November	21:00		Dusk
5194	0	0	0	0	0	0	0	Spring	2011-11-12	November	21:30		Dusk
5195	0	0	0	0	0	0	0	Spring	2011-11-12	November	22:00	21:46 end	Night
5196	0	0	0	0	0	0	0	Spring	2011-11-12	November	22:30		Night
5197	0	0	0	0	0	0	0	Spring	2011-11-12	November	23:00		Night
5198	0	0	0	0	0	0	0	Spring	2011-11-12	November	23:30		Night
5199	0	0	0	0	0	0	0	Spring	2011-11-13	November	0:00		Night
5200	0	0	0	0	0	0	0	Spring	2011-11-13	November	0:30		Night
5202	0	0	0	0	0	0	0	Spring	2011-11-13	November	1:30		Night
5203	0	0	0	0	0	0	0	Spring	2011-11-13	November	2:00		Night
5205	0	0	0	0	0	0	0	Spring	2011-11-13	November	3:00		Night
5206	0	0	0	0	0	0	0	Spring	2011-11-13	November	3:30	3:31 begin	Night
5207	0	0	0	0	0	0	0	Spring	2011-11-13	November	4:00		Dawn
5208	0	0	0	0	0	0	0	Spring	2011-11-13	November	4:30		Dawn
5209	0	0	0	0	0	0	0	Spring	2011-11-13	November	5:00	5:02 rise	Dawn
5210	0	0	0	0	0	0	0	Spring	2011-11-13	November	5:30		Morning
[truncated: 12,433 more rows]

## Sheet: Random number
5230
11044
7621
7821
3159
2992
11359
1877
7446
5191
7566
11446
11766
11279
7480
831
14063
10606
11961
13989
14425
2845
1238
1192
228
2348
4334
6892
6707
9868
9859
3560
8532
5461
6238
723
1536
2939
12056
4732
1689
7118
12448
528
14211
9386
9648
8843
5723
12036
6173
10092
10878
10313
6318
14126
8951
3572
439
10361
500
11097
1352
588
4455
11139
11178
9549
7501
995
5697
8497
6481
12006
763
4452
2427
1033
3090
5240
12906
7273
4728
14408
2744
10374
3738
11460
11845
9547
3623
14271
3929
72
10525
2572
10537
6593
14278
2454
6595
13005
11503
7515
5567
2490
10388
10766
1815
5520
5328
4846
5126
8376
8123
1277
11523
7151
6150
5387
1734
13525
7106
4398
11375
3961
7131
7620
8290
11382
7706
2563
2187
8818
5100
10265
13779
11165
646
12687
8112
511
9195
6929
14101
5859
9837
10972
3359
3551
14323
13337
13125
2578
10822
8097
8539
14248
8159
1217
6956
13513
12086
8810
161
7714
3533
10434
6779
1497
643
14043
5236
11111
8036
13228
4106
8633
8874
667
12694
4532
1807
7829
6808
2414
14241
6913
9442
6758
3122
10842
3194
13417
9557
13246
8700
10611
8834
2739
3506
4918
4034
10110
1580
12722
4203
1573
8871
12376
2973
8900
6487
592
6095
6823
12608
12360
7066
6535
12641
1907
14325
2176
8492
3508
9674
9918
9932
462
6323
10800
7253
14332
8394
14335
11637
5806
5897
2793
6699
5996
7564
14117
9283
10925
3247
3880
1393
11294
10796
9210
7380
13245
7738
4285
5794
2505
5903
4093
10360
13961
10455
1163
11518
11213
13925
938
6748
4154
2875
6284
329
4385
1366
2935
10629
155
13537
10362
10083
13182
9693
6310
4731
240
9339
3145
1651
7557
5085
8637
12505
6283
6219
10278
8535
8588
12019
8701
823
10288
5258
137
11373
10169
12487
12590
7132
2706
12656
704
5693
14020
121
976
4907
5744
4198
2971
5395
11316
10774
10669
5202
9375
11791
11458
942
24
2349
10004
2255
11295
1524
3554
12052
11163
9034
4611
9061
330
10219
12022
7701
10993
804
10635
8038
11115
7864
1780
10964
10382
12828
10514
12339
3684
1339
4593
5819
3038
2339
13889
12916
6747
2289
12602
4260
533
12120
2651
9237
6199
3735
67
9922
11657
12363
12625
4140
2916
13938
10412
4083
6590
2953
13634
11865
1684
8362
2032
3225
3967
1560
3921
11345
7748
6905
2566
2743
5971
4782
10432
8562
4046
9976
10437
3007
5119
13311
879
8353
6780
3756
10079
5412
2831
2836
5186
8306
6941
7362
7509
3858
6221
9884
2494
3957
13462
11746
3017
7893
4925
8199
1448
12366
5924
4863
11668
989
8280
3829
13734
5410
11932
8749
2090
4981
4254
12553
6354
9368
9140
773
12922
12001
4102
4033
4005
7464
362
4364
8516
205
7389
1394
4778
6399
9189
9855
10791
13346
8823
665
5246
97
4474
3065
1970
11784
13612
8517
11145
6706
4355
4076
6475
2631
13493
2360
11824
8044
13448
623
12705
6824
2914
10845
5349
12666
8445
13305
14303
12158
9115
9419
12433
9108
7020
7026
6381
645
1219
8354
14432
9527
4104
12610
4341
12227
7863
9713
8990
3717
13383
7772
13660
8786
13027
1023
10045
3285
9324
12185
8293
6385
4376
7124
3782
1977
11167
2644
4787
9583
6027
13084
8960
7451
3267
5146
4952
307
1134
7918
13971
12425
2616
7581
940
11770
4130
5009
6621
6426
11478
7408
3481
9003
9390
10400
2129
5337
2719
10452
4827
8658
7064
7041
9580
8456
415
10297
8567
9151
14367
13917
2450
4713
7094
4905
216
9447
6554
73
8231
7686
5807
3988
591
6370
6477
10508
8010
1605
7656
11942
1587
9767
12078
8007
12416
4329
7583
6136
8425
7061
2376
5178
1986
14345
11047
5540
12764
10099
7788
12349
12432
12858
13946
13430
4121
11021
17
13894
342
5489
14025
2869
3619
3871
6624
6064
12682
14406
12635
6119
7810
3299
13013
12474
12340
13130
5879
7824
179
6415
6574
12299
9250
9964
10000
2375
10170
3250
11269
14318
40
1026
388
5431
9948
10217
3466
9388
13648
2026
2460
11578
11725
12624
454
2272
9875
4994
1074
5031
5492
1627
9680
10323
7636
11676
14282
13888
10504
32
9143
8035
10457
2206
1094
2137
3889
13516
8685
11050
3100
10081
10728
12026
5368
7056
13400
11719
10954
11901
8854
14208
13883
12187
576
5575
1925
4394
11464
8526
7373
5690
6113
707
7149
10759
9507
2223
11540
8196
9325
10279
1862
9886
2430
7523
2097
9638
2897
7150
6662
14362
1009
4899
2161
14347
1367
6893
14310
1686
13845
13932
6101
5127
441
2909
10074
2901
14031
1264
5582
7252
7536
8726
5826
7053
4161
13023
4314
20
6180
1786
6736
5345
8644
1774
12845
9096
36
3476
1168
1535
9494
1495
11703
9258
11986
9290
12243
6836
8665
3832
13093
5902
4403
4794
349
6144
3255
226
13887
12191
3774
12884
11421
5521
4706
10506
2600
14264
1887
9286
6166
2178
12714
7887
12782
6760
9164
8259
9649
13100
9459
8174
669
1309
10790
9978
3906
13437
10353
3830
6157
10947
9915
7378
5274
4064
5788
10256
10247
13858
7692
12356
7157
12874
13566
3650
3517
4983
14018
3613
13977
813
11639
6307
8065
10916
5899
13885
9565
2014
4620
10316
3411
3099
14263
2642
6914
13253
4536
14199
9898
12015
2952
5514
5565
2761
8464
2887
13778
12045
13168
10541
3991
9089
13503
10486
11286
4258
3794
5046
7874
8359
2989
14376
5588
3140
10024
1332
5823
697
12170
3307
6950
13898
2060
2608
6008
6551
1671
331
8886
1149
1799
6265
6243
3949
6146
14156
8481
6646
7447
6982
2474
5638
6873
12247
13696
2227
10865
6368
2132
7752
6320
1364
10093
11935
638
12692
9014
8361
3744
1498
8821
474
13205
395
2750
13978
11792
5699
102
10572
9869
4540
3703
5995
4921
13197
12732
13927
8596
9940
6898
10227
3073
12737
8043
1638
13740
8201
2671
9888
3391
6721
1724
13988
12381
13263
12638
3049
9943
13640
11303
6410
4074
1959
1234
10260
4157
12179
14064
13797
9318
7853
1088
12746
3483
12907
13325
7409
966
8086
5175
2861
14169
7222
2607
11416
8933
13244
9356
3305
13553
8051
6455
2508
13796
11143
10941
1181
4699
4697
7949
1491
298
5539
2196
7753
12485
8247
8407
9746
9441
7803
9156
5626
4356
3350
12860
10926
13741
12200
11257
7163
10411
8773
4498
201
5577
5304
2571
2018
13482
11010
12464
12302
12134
11616
406
3131
7942
12094
2727
12668
6726
10844
1920
4993
5923
11157
7699
2908
4215
10809
9414
9
6855
3729
7857
12976
13974
12642
6421
14001
6257
9893
8104
7067
10198
10230
8403
2143
13624
2485
8703
3661
11917
2523
3167
14212
12521
3360
12708
3785
5516
3728
14055
6163
4686
262
5166
11221
7448
903
3389
6356
6285
9735
5485
12055
4098
6000
3971
447
12846
6210
1174
2069
14045
3897
3951
5113
6716
2092
5366
7906
8370
1690
982
4054
9632
3283
4937
117
12837
9252
3513
13851
9810
1452
8760
9519
11067
5657
2071
320
13149
6787
9051
1218
6519
13172
281
9594
3088
8047
75
2833
10962
4955
10536
4960
10599
3069
5381
11326
809
13481
10062
8883
8771
838
3013
7524
1431
11681
13357
642
11709
13723
7425
6676
2812
10968
6272
4860
5456
7717
3960
953
12101
12403
10904
13251
9541
4733
13510
3248
8890
13904
5295
14284
5815
9264
13981
6497
7519
1899
2731
10899
1886
1208
13877
12199
13216
1082
7383
11080
1950
11531
11003
5653
14189
13682
14266
10793
5581
10168
1823
4232
3831
12142
14279
4063
5818
12217
11280
4873
8173
8879
8078
2658
7336
1237
1262
1314
6081
1717
7475
9166
5238
8076
2724
7612
6112
8985
4581
2398
7009
10686
8163
11318
10317
257
2889
1353
10484
1465
12343
4948
6306
11193
437
4819
4348
5509
4999
10449
13129
8305
7507
3838
12630
11713
7956
9236
5372
8835
14042
5518
3324
2670
4337
9526
8761
3201
9910
8597
13146
2146
13063
5884
7209
8978
521
710
13714
5142
695
2559
7284
8377
9516
6977
11041
2408
3608
1647
2873
14057
11366
5026
90
5282
8002
1242
12593
675
6231
7638
3107
328
9589
7203
9797
7644
6045
7732
8857
9562
13308
5580
12488
12623
12693
12964
6826
2290
8932
5503
11566
4479
7263
4209
7042
3845
11437
7542
3779
8325
13150
11068
11920
314
14405
8764
9581
7941
4362
6566
10082
2936
1997
4222
8270
10604
12912
4857
2472
7983
3614
653
1081
348
6714
12466
4619
11948
3731
4836
6325
6114
11266
4018
11971
5761
5062
10341
13438
12525
6868
223
12646
7735
14017
1656
6544
5562
13868
13340
10280
4436
9591
13
13728
130
13467
4062
2076
8025
2784
6227
10767
3309

## Sheet: Results
PPV	TPR	Deviation
0	0	0
0	0	0								Mean	SD	SE	95%CI	lower CI	Upper CI
	0	0							Positive prediction Value (PPV)	40.4284	41.2824	1.93111	3.78491	36.6435	44.2133
	0	0							True Positive Rate (TPR) - Sensitivity	80.3586	28.0875	1.74191	3.41408	76.9445	83.7727
	0	0							Deviation	0.610534	1.31013	0.0344891	0.0675975	0.542936	0.678131
	0	0
	0	0
	0	0
	0	0
	0	0
	0	0
	0	0
	0	3
	0	4
	0	3
	0	1
	0	1
100	20	0
100	25	0
100	25	0
50	33.3333	0
100	33.3333	0
100	33.3333	0
100	33.3333	0
100	33.3333	1
66.6667	40	0
100	40	0
16.6667	50	0
25	50	0
50	50	0
60	50	0
66.6667	50	0
66.6667	50	1
75	50	0
100	50	0
100	50	0
100	50	0
100	50	0
100	50	0
100	50	3
71.4286	55.5556	0
100	57.1429	0
50	60	0
66.6667	60	0
100	60	0
100	60	0
84.6154	61.1111	0
86.6667	61.9048	0
62.5	62.5	1
87.5	63.6364	4
100	64.7059	0
40	66.6667	0
50	66.6667	0
50	66.6667	0
50	66.6667	0
66.6667	66.6667	0
66.6667	66.6667	0
100	66.6667	0
100	66.6667	0
100	66.6667	0
100	66.6667	0
100	66.6667	2
73.3333	68.75	2
90	69.2308	0
38.8889	70	0
53.8462	70	0
100	71.4286	1
77.7778	73.6842	0
37.5	75	0
50	75	0
60	75	0
75	75	0
75	75	0
85.7143	75	0
85.7143	75	0
100	75	0
100	75	0
100	75	1
100	75	1
71.4286	76.9231	0
71.4286	76.9231	0
70	77.7778	2
77.7778	77.7778	0
87.5	77.7778	0
44.4444	80	0
44.4444	80	0
57.1429	80	0
57.1429	80	0
57.1429	80	0
66.6667	80	0
66.6667	80	0
80	80	0
100	80	0
86.6667	81.25	1
90	81.8182	0
45.4545	83.3333	0
62.5	83.3333	0
62.5	83.3333	0
62.5	83.3333	0
71.4286	83.3333	0
71.4286	83.3333	0
71.4286	83.3333	0
83.3333	83.3333	0
90.9091	83.3333	0
100	83.3333	0
91.3043	84	2
60	85.7143	0
63.1579	85.7143	0
66.6667	85.7143	0
75	85.7143	0
75	85.7143	0
85.7143	85.7143	0
92.3077	85.7143	0
100	85.7143	0
100	85.7143	0
100	85.7143	0
58.3333	87.5	0
63.6364	87.5	0
70	87.5	0
78.2609	87.8049	0
66.6667	88.8889	0
50	90	0
69.2308	90	0
75	90	0
83.3333	90.9091	0
83.3333	90.9091	0
83.3333	90.9091	0
83.3333	90.9091	0
73.3333	91.6667	0
77.2727	91.8919	0
66.6667	92.3077	0
70.5882	92.3077	0
81.25	92.8571	0
20	100	0
20	100	0
25	100	0
25	100	1
27.2727	100	0
33.3333	100	0
33.3333	100	0
33.3333	100	0
33.3333	100	0
33.3333	100	0
33.3333	100	0
40	100	0
40	100	0
42.8571	100	0
50	100	0
50	100	0
50	100	0
50	100	0
50	100	0
50	100	0
50	100	0
50	100	0
50	100	0
50	100	0
50	100	0
50	100	0
50	100	0
50	100	0
50	100	0
50	100	1
54.5455	100	0
54.5455	100	0
57.1429	100	0
57.1429	100	0
57.8947	100	0
60	100	0
60	100	0
60	100	0
60	100	0
61.5385	100	0
62.5	100	0
62.5	100	0
63.6364	100	0
64.2857	100	0
66.6667	100	0
66.6667	100	0
66.6667	100	0
66.6667	100	0
66.6667	100	0
66.6667	100	0
66.6667	100	0
66.6667	100	0
66.6667	100	0
66.6667	100	0
68.4211	100	0
71.4286	100	0
71.4286	100	0
72.7273	100	0
75	100	0
75	100	0
75	100	0
75	100	0
75	100	0
75	100	0
75	100	1
75	100	0
77.7778	100	0
77.7778	100	0
80	100	1
81.8182	100	0
83.3333	100	0
83.3333	100	0
85.7143	100	0
88.8889	100	0
91.6667	100	0
94.1176	100	0
100	100	0
100	100	0
100	100	0
100	100	0
100	100	0
100	100	0
100	100	0
100	100	0
100	100	0
100	100	0
100	100	0
100	100	0
100	100	0
100	100	0
100	100	0
100	100	0
100	100	0
100	100	0
100	100	0
100	100	0
100	100	0
100	100	0
100	100	0
100	100	0
100	100	0
100	100	0
100	100	0
100	100	0
100	100	0
100	100	0
100	100	0
100	100	0
100	100	0
100	100	0
100	100	0
100	100	0
100	100	0
100	100	0
100	100	0
100	100	1
100	100	1
100	100	1
100	100	2
100	100	1
100	100	1
100	100	1
100	100	2
100	100	1
100	100	1
100	100	2
100	100	1
0		0
0		0
0		0
0		0
0		0
0		0
0		0
0		0
0		0
0		0
0		0
0		0
0		0
0		0
0		0
0		0
0		0
0		0
0		0
0		0
0		0
0		0
0		0
0		0
0		0
0		0
0		0
0		0
0		0
0		0
0		0
0		0
0		0
0		0
0		0
0		0
0		0
0		0
0		0
0		0
0		0
0		0
0		0
0		0
0		0
0		0
0		0
0		0
0		0
0		0
0		0
0		0
0		0
0		0
0		0
0		0
0		0
0		0
0		0
0		0
0		0
0		0
0		0
0		0
0		0
0		0
0		0
0		0
0		0
0		0
0		0
0		0
0		0
0		0
0		0
0		0
0		0
0		0
0		0
0		0
0		0
0		0
0		0
0		0
0		0
0		0
0		0
0		0
0		0
0		0
0		0
0		0
0		0
0		0
0		0
0		0
0		0
0		0
0		0
0		0
0		0
0		0
0		0
0		0
0		0
0		0
0		0
0		0
0		0
0		0
0		0
0		0
0		0
0		0
0		0
0		0
0		0
0		0
0		0
0		0
0		0
0		0
0		0
0		0
0		0
0		0
0		0
0		0
0		0
0		0
0		0
0		0
0		0
0		0
0		0
0		0
0		0
0		0
0		0
0		0
0		0
0		0
0		0
0		0
0		0
0		0
0		0
0		0
0		0
0		0
0		0
0		0
0		0
0		0
0		0
0		0
0		0
0		0
0		0
0		0
0		0
0		0
0		0
0		0
0		0
0		0
0		0
0		0
0		0
0		0
0		0
0		0
0		0
0		0
0		0
0		0
0		0
0		0
0		0
0		0
0		0
0		0
0		0
0		0
0		0
0		0
0		0
0		0
0		0
0		0
0		0
0		0
0		0
0		0
0		0
0		0
0		0
0		1
0		1
0		1
0		1
0		1
0		1
0		2
0		2
0		3
0		2
0		1
0		2
0		1
0		1
0		2
		0
		0
		0
		0
		0
		0
		0
		0
		0
		0
		0
		0
		0
		0
		0
		0
		0
		0
		0
		0
		0
		0
		0
		0
		0
		0
		0
		0
		0
		0
		0
		0
		0
		0
		0
		0
		0
		0
		0
		0
		0
		0
		0
		0
		0
		0
		0
		0
		0
		0
		0
		0
		0
		0
		0
		0
		0
		0
		0
		0
		0
		0
		0
		0
		0
		0
		0
		0
		0
		0
		0
		0
		0
		0
		0
		0
		0
		0
		0
		0
		0
		0
		0
		0
		0
		0
		0
		0
		0
		0
		0
		0
		0
		0
		0
		0
		0
		0
		0
		0
		0
		0
		0
		0
		0
		0
		0
		0
		0
		0
		0
		0
		0
		0
		0
		0
		0
		0
		0
		0
		0
		0
		0
		0
		0
		0
		0
		0
		0
		0
		0
		0
		0
		0
		0
		0
		0
		0
		0
		0
		0
		0
		0
		0
		0
		0
		0
		0
		0
		0
		0
		0
		0
		0
		0
		0
		0
		0
		0
		0
		0
		0
		0
		0
		0
		0
		0
		0
		0
		0
		0
		0
		0
		0
		0
		0
		0
		0
		0
		0
		0
		0
		0
		0
		0
		0
		0
		0
		0
		0
		0
		0
		0
		0
		0
		0
		0
		0
		0
		0
		0
		0
		0
		0
		0
		0
		0
		0
		0
		0
		0
		0
		0
		0
		0
		0
		0
		0
		0
		0
		0
		0
		0
		0
		0
		0
		0
		0
		0
		0
		0
		0
		0
		0
		0
		0
		0
		0
		0
		0
		0
		0
		0
		0
		0
		0
		0
		0
		0
		0
		0
		0
		0
		0
		0
		0
		0
		0
		0
		0
		0
		0
		0
		0
		0
		0
		0
		0
		0
		0
		0
		0
		0
		0
		0
		0
		0
		0
		0
		0
		0
		0
		0
		0
		0
		0
		0
		0
		0
		0
		0
		0
		0
		0
		0
		0
		0
		0
		0
		0
		0
		0
		0
		0
		0
		0
		0
		0
		0
		0
		0
		0
		0
		0
		0
		0
		0
		0
		0
		0
		0
		0
		0
		0
		0
		0
		0
		0
		0
		0
		0
		0
		0
		0
		0
		0
		0
		0
		0
		0
		0
		0
		0
		0
		0
		0
		0
		0
		0
		0
		0
		0
		0
		0
		0
		0
		0
		0
		0
		0
		0
		0
		0
		0
		0
		0
		0
		0
		0
		0
		0
		0
		0
		0
		0
		0
		0
		0
		0
		0
		0
		0
		0
		0
		0
		0
		0
		0
		0
		0
		0
		0
		0
		0
		0
		0
		0
		0
		0
		0
		0
		0
		0
		0
		0
		0
		0
		0
		0
		0
		0
		0
		0
		0
		0
		0
		0
		0
		0
		0
		0
		0
		0
		0
		0
		0
		0
		0
		0
		0
		0
		0
		0
		0
		0
		0
		0
		0
		0
		0
		0
		0
		0
		0
		0
		0
		0
		0
		0
		0
		0
		0
		0
		0
		0
		0
		0
		0
		0
		0
		0
		0
		0
		0
		0
		0
		0
		0
		0
		0
		0
		0
		0
		0
		0
		0
		0
		0
		0
		0
		0
		0
		0
		0
		0
		0
		0
		0
		0
		0
		0
		0
		0
		0
		0
		0
		0
		0
		0
		0
		0
		0
		0
		0
		0
		0
		0
		0
		0
		0
		0
		0
		0
		0
		0
		0
		0
		0
		0
		0
		0
		0
		0
		0
		0
		0
		0
		0
		0
		0
		0
		0
		0
		0
		0
		0
		0
		0
		0
		0
		0
		0
		0
		0
		0
		0
		0
		0
		0
		0
		5
		5
		1
		2
		2
		1
		2
		2
		1
		2
		1
		2
		1
		1
		1
		1
		0
		0
		0
		0
		0
		0
		0
		0
		0
		0
		0
		0
		0
		0
		0
		0
		0
		0
		0
		0
		0
		0
		0
		0
		0
		0
		0
		0
		0
		0
		0
		0
		0
		0
		0
		0
		0
		0
		0
		0
		0
		0
		0
		0
		0
		0
		0
		0
		0
		1
		1
		1
		1
		3
		2
		1
		1
		1
		2
		1
		6
		4
		3
		2
		2
		1
		1
		1
		3
		2
		4
		2
		2
		6
		3
		4
		5
		1
		1
		1
		2
		1
		1
		3
		1
		1
		4
		1
		6
		1
		0
		1
		1
		7
		1
		1
		1
		2
		1
		1
		0
		2
		2
		1
		0
		5
		2
		2
		2
		1
		7
		2
		1
		2
		2
		1
		1
		1
		1
		2
		1
		1
		0
		0
		2
		3
		1
		3
		2
		2
		1
		1
		1
		1
		1
		2
		4
		3
		1
		3
		6
		2
		1
		1
		4
		2
		1
		1
		1
		1
		2
		5
		2
		1
		1
		0
		0
		1
		1
		2
		2
		5
		4
		3
		1
		5
		3
		3
		2
		2
		2
		0
		4
		2
		2
		2
		2
		4
		3
		1
		1
		4
		8
		6
		3
		3
		3
		2
		2
		5
		5
		2
		3
		3
		1
		1
		2
		2
		1
		1
		1
		1
		2
		3
		3
		1
		2
		1
		1
		1
		0
		0
		1
		9
		6
		8
		4
		6
		4
		3
		3
		2
		2
		4
		2
		6
		4
		2
		2
		2
		8
		3
		3
		2
		4
		4
		8
		1
		1
		1
		1
		1
		3
		1
		2
		4
		2
		1
		7
		3
		4
		9
		5
		3
		1
		3
		3
		2
		2
		1
		2
		1
		1
		1
		4
		1
		1
		1
		2
		4
		2
		6
		1
		8
		2
		1
		1
		3
		4
		1
		1
		1
		4
		1
		1
		2
		5
		1
		8
		1
		1
		2
		2
		1
		1
		2
		2
		2
		1
		1
		1
		3
		1
		1
		5
		1
		3
		1
		1
		1
		1
		2
		1
		1
		4
		1
		1
		3
		2
		2
		1
		2
		1
		1
		3
		3
		2
		1
		1
		6
		5
		1
		11
		1
		2
		1
		1
		7
		2
		1
		1
		1
		2
		1
		1
		2
		2
		1
		1
		3
		1
		1
		1
		3
		1
		1
		3
		2
		3
		1
		1
		1
		2
		2
		1
		3
		1
		1
		1
		1
		2
		3
		1
		1
		1
		1
		1
		1
		5
		1
		1
		3
		2
		1
		2
		1
		1
		1
		4
		1
		1
		3
		1
		1
		2
		1
		1
		2
		1
		2
		1
		1
		1
		1
		1
